# Supplementary material for: Epidermal PAR-6 and PKC-3 are essential for larval development of C. elegans and organize non-centrosomal microtubules
Source: eLife journal article supplement (doi:10.7554/elife.62067), 2020-12-10
Supplement: fig2-figsupp1-data1 [file Growth curve PAR-6 - PKC-3.xlsx]

## Sheet: Sheet1
	Aux_con_BOX285	Aux_con_P6degPKC3deg	Aux_con_PKC3deg	L4440	NGM_BOX285	NGM_PAR6degPKC3deg	NGM_PKC3deg				Aux_con_BOX285	Aux_con_P6degPKC3deg	Aux_con_PKC3deg	L4440	NGM_BOX285	NGM_PdegPKC3deg	NGM_PKC3deg				Aux_con_BOX285	Aux_con_P6degPKC3deg	Aux_con_PKC3deg	L4440	NGM_BOX285	NGM_PdegPKC3deg	NGM_PKC3deg				Aux_con_BOX285	Aux_con_P6degPKC3deg	Aux_con_PKC3deg	L4440	NGM_BOX285	NGM_PdegPKC3deg	NGM_PKC3deg				Aux_con_BOX285	Aux_con_P6degPKC3deg	Aux_con_PKC3deg	L4440	NGM_BOX285	NGM_PdegPKC3deg	NGM_PKC3deg
1	231.926	243.58	202.522	209.413	214.416	258.072	286.858			1	483.12	418.467	466.301	554.348	550.753	430.457	480.01			1	1007.25	965.633	1014.47	1045.56	1016.09	1132.14	933.322			1	1362.06	1319.15	1264.9	1412.09	1344.4	1366.96	1262.47			1	1324.32	1263.7	1388.04	1395.02	1543.96	1549.06	1405.88
2	191.715	226.883	229.73	179.059	232.181	229.778	299.022			2	440.317	453.748	455.618	528.28	473.147	536.853	478.894			2	985.49	1040.19	1032.3	975.374	1123.62	933.777	952.736			2	1288.12	1192.3	968.537	1277.15	1343.84	1224.67	1269.2			2	1388.6	1269.56	1373.47	1519.08	1494.41	1348.86	1290.2
3	234.418	242.594	300.011	165.905	201.023	272.336	344.975			3	505.627	464.534	439.025	558.91	541.254	544.556	527.283			3	1017.83	934.617	1106.8	987.749	727.034	1060.41	1262.8			3	1217.73	1276.02	1301.57	1360.68	1286.38	1299.05	1338.4			3	1400.81	1467.64	1365.93	1468.15	1471.87	1360.11	1432.55
4	224.463	297.147	227.433	271.532	236.722	269.903	221.909			4	447.172	426.921	445.678	526.432	540.908	569.882	493.596			4	1049.64	919.431	1037.53	1050.29	1156.88	990.954	1083.62			4	1227.86	1199.25	1273.6	1217.3	1384.1	1399.92	1204.48			4	1396.59	1172.31	1344.93	1413.26	1435.62	1398.93	1454.95
5	229.21	244.32	168.283	240.667	214.071	256.478	259.12			5	503.238	437.566	474.502	593.655	502.409	568.407	565.034			5	1049.69	1098.85	993.246	985.53	983.942	1050.15	916.403			5	1334.15	1149.48	1271.26	1270.88	1422.38	1093.34				5	1328.03	1337.72	1455.96	1509.33	1414.74	1311.3	1232.36
6	199.784	233.196	213.327	184.02	249.163		249.936			6	491.916	417.108	431.741	506.068	522.489	554.407	686.324			6	1051.05	973.766	1066.68	1112.04	1045.76	993.343	983.492			6		1223	1315.81	1319		1281.93				6	1444.46	1284.63	1337.81	1432.45	1596.95	1360.84	1366.35
7		233.851	216.076	234.328	251.39		247.156			7		434.655	454.288	558.49	458.88	563.986	687.683			7		914.906	929.896	1137.01	1068.59		927.025			7		1243.34	1300.86	1310.37		1273.82				7	1402.75	1350.58	1461.74	1518.87	1592.85	1439.68	1407.97
8		241.314	221.339	212.36			264.811			8				509.659		519.387				8		954.289	1043.75	1077.26			1072.39			8			1456.28	1384.84		1193.58				8		1298.99	1434.73	1456.57	1531.2		1420.42
9		206.756		247.026						9				551.577						9		1051.29		1082						9				1296.21						9			1497.49	1489.14	1517.83
10		236.759		237.931						10				567.395						10		706.326		1088.41						10				1429.27						10				1459.05
11		215.374		245.741						11										11				1074.86						11				1325.96						11				1508.58
12				250.473						12										12				1078.85						12				1336.47						12				1467.03
13				207.016						13										13				1104.23						13				1314.14						13
14										14										14										14				1394.86						14
Average	218.586	238.343	222.34	221.959	228.424	257.313	271.723				478.565	436.143	452.45	545.481	512.834	535.992	559.832				1026.82	955.929	1028.08	1061.47	1017.42	1026.8	1016.47				1285.98	1228.94	1269.1	1332.09	1356.22	1266.66	1268.64				1383.65	1305.64	1406.68	1469.71	1511.05	1395.54	1376.34
stdev	18.1746	22.9211	36.9357	31.7769	19.1205	16.9089	37.997				28.2437	17.7014	14.9806	27.4098	35.8741	45.9961	91.9622				27.5781	106.878	52.2057	50.7945	141.182	69.0364	118.557				63.5398	56.4724	136.099	59.2475	50.8038	97.3182	54.8363				43.1362	85.0352	57.1844	41.2976	63.6221	78.8067	76.9087
Average	Auxin_BOX285	Auxin_Par6degPKC3deg	Auxin_PKC3deg	L4440	NGM_BOX285	NGM_PAR6degPKC3deg	NGM_PKC3deg			St dev	Aux_con_BOX285	Aux_con_P6degPKC3deg	Aux_con_PKC3deg	L4440	NGM_BOX285	NGM_PdegPKC3deg	NGM_PKC3deg
	218.586	238.343	222.34	221.959	228.424	257.313	271.723				18.1746	22.9211	36.9357	31.7769	19.1205	16.9089	37.997
	478.565	436.143	452.45	545.481	512.834	535.992	559.832				28.2437	17.7014	14.9806	27.4098	35.8741	45.9961	91.9622
	1026.82	955.929	1028.08	1061.47	1017.42	1026.8	1016.47				27.5781	106.878	52.2057	50.7945	141.182	69.0364	118.557
	1285.98	1228.94	1269.1	1332.09	1356.22	1266.66	1268.64				63.5398	56.4724	136.099	59.2475	50.8038	97.3182	54.8363
	1383.65	1305.64	1406.68	1469.71	1511.05	1395.54	1376.34				43.1362	85.0352	57.1844	41.2976	63.6221	78.8067	76.9087
