# Supplementary material for: Epidermal PAR-6 and PKC-3 are essential for larval development of C. elegans and organize non-centrosomal microtubules
Source: eLife journal article supplement (doi:10.7554/elife.62067), 2020-12-10
Supplement: fig3-data1 [file PAR-6 molting.xlsx]

## Sheet: Control 9
File	Time	H development		Area	Mean Intensity	Min	Max	Average background	Corrected intenisty		H development	Corrected intenisty	St dev
191108_PAR6_9h_C	10:03:00	1 day, 1:03:00	Worm	5847.92	9712.53	3402	16383	2618.88	7093.66		1 day, 1:03:00	6802.59	442.347
			Background	4757.98	2620.78	2431	2812				1 day, 1:43:00	7459.76	95.1857
			Background	6259.33	2553.86	2361	2808				1 day, 2:53:00	6738.71	1897.89
			Background	12498	2640.97	2435	2879				1 day, 4:04:00	5983.15	2168.61
			Background	7946.18	2659.91	2451	2852				1 day, 4:54:00	2284.9	37.1708
191108_PAR6_9h_C-02	10:03:00	1 day, 1:03:00	Worm	5416.73	9630.42	3357	16383	2609.86	7020.56		1 day, 7:34:00	2450.76	1310.46
			Background	4044	2600.64	2393	2787				1 day, 8:35:00	2870.9	675.599
			Background	6434.94	2594.59	2399	2812
			Background	12065.2	2627.52	2434	2830
			Background	7835.71	2616.7	2429	2837
191108_PAR6_9h_C-03	10:04:00	1 day, 1:04:00	Worm	4924.52	8807.8	3655	16383	2514.24	6293.56
			Background	5949.33	2593.57	2387	2779
			Background	10165.6	2439.21	2258	2622
			Background	11330.6	2433.98	2263	2627
			Background	6303.85	2590.19	2386	2777
191108_PAR6_9h_C-04	10:43:00	1 day, 1:43:00	Worm	5086.12	9966.52	3342	16383	2611.17	7355.36
			Background	4732.42	2563.92	2358	2789
			Background	9158.97	2665.12	2450	2850
			Background	1648.93	2605.64	2436	2775
			Background	6138.14	2610	2410	2798
191108_PAR6_9h_C-05	10:44:00	1 day, 1:44:00	Worm	5266.68	10056	3693	16383	2514.26	7541.71
			Background	11478.2	2537.07	2313	2777
			Background	9209.26	2457.86	2247	2682
			Background	24166.7	2606.19	2338	2897
			Background	10511.1	2455.93	2235	2645
191108_PAR6_9h_C-06	10:44:00	1 day, 1:44:00	Worm	5727.55	9754.77	2490	16383	2272.56	7482.21
			Background	51707.1	2190.4	1996	2444
			Background	23460.1	2268.61	2081	2458
			Background	31685	2252.43	1999	2523
			Background	29975.9	2378.79	2142	2622
191108_PAR6_9h_C-07	11:53:00	1 day, 2:53:00	Worm	4945.96	9640.35	2836	16383	2302.8	7337.55
			Background	28557.8	2221.96	1975	2522
			Background	42262	2309.34	1995	2649
			Background	37071.2	2337.15	2113	2549
			Background	47113.2	2342.76	2050	2673
191108_PAR6_9h_C-08	11:53:00	1 day, 2:53:00	Worm	6508.32	6931.72	2702	14150	2318.09	4613.63
			Background	40622.2	2202.43	1992	2434
			Background	25392.7	2383.94	2128	2651
			Background	33579.6	2307.64	2113	2497
			Background	27411	2378.34	2090	2649
191108_PAR6_9h_C-09	11:54:00	1 day, 2:54:00	Worm	5880.08	10529.8	3244	16383	2264.87	8264.95
			Background	54459.1	2228.3	2021	2492
			Background	45190.5	2226.07	1955	2535
			Background	55610.9	2331.94	2027	2630
			Background	32047.7	2273.18	2079	2505
191108_PAR6_9h_C-10	13:04:00	1 day, 4:04:00	Worm	5402.71	10582.6	2740	16383	2208.37	8374.22
			Background	21128.5	2072.81	1872	2260
			Background	21807.1	2235.21	2013	2520
			Background	65445.1	2247.54	1929	2568
			Background	57331.6	2277.94	2035	2590
191108_PAR6_9h_C-11	13:53:00	1 day, 4:53:00	Worm	7217.36	5606.72	2658	11432	2288.34	3318.38
			Background	52019.6	2195.33	1976	2437
			Background	43296.7	2281.85	2013	2604
			Background	58886.5	2376.52	2029	2698
			Background	39499.2	2299.68	2106	2519
191108_PAR6_9h_C-12	13:05:00	1 day, 4:05:00	Worm	7078.85	6337.54	2610	14272	2194.08	4143.45
			Background	39534.7	2156.31	1961	2361
			Background	30499.4	2099.79	1874	2345
			Background	110566	2212.28	2010	2436
			Background	75191.1	2307.96	2046	2608
191108_PAR6_9h_C-13	13:06:00	1 day, 4:06:00	Worm	6011.99	8041.6	3325	16383	2609.82	5431.78
			Background	28140.6	2512.28	2266	2768
			Background	25594.7	2527.71	2311	2804
			Background	11410.6	2729.71	2501	2969
			Background	13215.3	2669.58	2448	2928
191108_PAR6_9h_C-14	13:54:00	1 day, 4:54:00	Worm	6280.77	6815.26	2479	12810	2320.24	4495.03
			Background	97873.8	2212.26	1926	2550
			Background	66366.1	2323.62	2019	2675
			Background	90150.2	2384.49	1989	2738
			Background	70443.9	2360.57	2052	2740
191108_PAR6_9h_C-15	13:54:00	1 day, 4:54:00	Worm	5636.86	8603.3	3010	16383	2246.13	6357.17
			Background	37213	2138.18	1924	2348
			Background	32851.6	2234.84	1960	2494
			Background	88913.5	2287.97	2037	2635
			Background	76526.8	2323.53	1989	2674
191108_PAR6_9h_C-16	16:34:00	1 day, 7:34:00	Worm	6422.57	6500.91	2819	16383	2539.18	3961.72
			Background	87380	2473.64	2191	2845
			Background	52000.6	2549.48	2265	2895
			Background	96462.3	2564.57	2278	2896
			Background	82052.3	2569.05	2187	2949
191108_PAR6_9h_C-17	16:35:00	1 day, 7:35:00	Worm	9346.12	4144.67	2473	6737	2378.35	1766.33
			Background	124379	2357	2087	2711
			Background	101066	2365.98	1990	2806
			Background	65121.9	2433.13	2151	2815
			Background	65892	2357.28	2132	2640
191108_PAR6_9h_C-18	16:35:00	1 day, 7:35:00	Worm	9816.89	4006.06	2489	6642	2381.83	1624.23
			Background	119910	2344.09	2043	2757
			Background	86786.4	2391.42	2042	2725
			Background	85947.9	2417.51	2067	2715
			Background	32030.4	2374.3	2163	2558
191108_PAR6_9h_C-19	17:35:00	1 day, 8:35:00	Worm	8999.85	4613.58	2612	7601	2331.09	2282.49
			Background	54084.8	2258.86	2036	2470
			Background	58619.4	2322.19	2041	2623
			Background	67909.5	2380.15	2077	2710
			Background	89002.5	2363.15	2077	2640
191108_PAR6_9h_C-20	17:35:00	1 day, 8:35:00	Worm	10025.5	5993.38	2768	10659	2384.7	3608.68
			Background	101277	2354.85	2103	2695
			Background	50879.3	2325.82	2043	2669
			Background	98111.2	2449.83	2125	2812
			Background	49481	2408.29	2114	2656
191108_PAR6_9h_C-21	17:36:00	1 day, 8:36:00	Worm	8787.96	5156.53	2726	9547	2435.01	2721.52
			Background	67038.8	2383.19	2144	2655
			Background	106356	2412.24	2045	2854
			Background	134342	2496.58	2235	2834
			Background	126098	2448.05	2058	2849

## Sheet: Auxin 9
File	Time	H development		Area	Mean Intensity	Min	Max	Average background	Corrected intenisty				H development	Corrected intenisty	St dev
191108_PAR6_9h_A	10:07:00	1 day, 1:07:00	Worm	3194.8	2124.29	1837	2389	1984.8	139.488		15:00:00		1 day, 1:10:00	714.476	914.907
			Background	98634.8	1956.97	1707	2230						1 day, 1:50:00	529.925	934.395
			Background	71542.9	1932.46	1631	2240						1 day, 2:55:00	445.985	744.302
			Background	118640	2000.52	1764	2273						1 day, 4:10:00	260.755	212.98
			Background	121150	2049.27	1737	2399						1 day, 4:55:00	196.741	54.5922
191108_PAR6_9h_A-02	10:07:00	1 day, 1:07:00	Worm	2808.12	1995.9	1777	2258	1770.06	225.833				1 day, 7:40:00	192.836	48.4569
			Background	69677.1	1732.63	1550	1967						1 day, 8:38:00	144.126	75.7414
			Background	120515	1763.33	1491	2053
			Background	96785.5	1789.49	1567	2039
			Background	82364	1794.8	1542	2100
191108_PAR6_9h_A-03	10:08:00	1 day, 1:08:00	Worm	5390.35	4272.19	2088	8574	1823.75	2448.44
			Background	60901.5	1762.11	1574	2000
			Background	97556.4	1773.01	1499	2069
			Background	109185	1868.39	1651	2146
			Background	94770.5	1891.5	1633	2147
191108_PAR6_9h_A-04	10:08:00	1 day, 1:08:00	Worm	2687.75	3325.43	2043	6449	1779.56	1545.88
			Background	105960	1747.27	1559	1973
			Background	137471	1761.96	1485	2101
			Background	77540.8	1782.94	1582	2026
			Background	109700	1826.06	1551	2109
191108_PAR6_9h_A-05	10:09:00	1 day, 1:09:00	Worm	913.506	2320.95	2115	2537	2060	260.944
			Background	54454.2	1981.64	1760	2207
			Background	103885	2031.64	1678	2446
			Background	145597	2102.89	1721	2418
			Background	171782	2123.83	1777	2442
191108_PAR6_9h_A-06	10:10:00	1 day, 1:10:00	Worm	3142.86	2202.56	1874	2543	2015.27	187.288
			Background	94932.1	1988.15	1698	2256
			Background	89503.8	1981.51	1689	2292
			Background	74333.7	2031.53	1825	2240
			Background	121097	2059.91	1717	2385
191108_PAR6_9h_A-07	10:11:00	1 day, 1:11:00	Worm	3066.18	2228.11	1944	2525	2034.65	193.46
			Background	78950.7	2000.34	1799	2243
			Background	109479	2028.71	1718	2346
			Background	70912.2	2063.98	1858	2275
			Background	90349.7	2045.58	1766	2365
191108_PAR6_9h_A-08	10:45:00	1 day, 1:45:00	Worm	5786.91	4569.31	1959	8995	1839.61	2729.7
			Background	137037	1831.87	1612	2090
			Background	107101	1836.23	1550	2132
			Background	106137	1860.07	1636	2085
			Background	123360	1830.29	1548	2121
191108_PAR6_9h_A-09	10:46:00	1 day, 1:46:00	Worm	2841.93	2683.46	1913	4195	1774.65	908.811
			Background	129342	1786.9	1551	2026
			Background	110684	1721.53	1433	2010
			Background	109596	1811.9	1617	2063
			Background	129754	1778.26	1501	2086
191108_PAR6_9h_A-10	10:46:00	1 day, 1:46:00	Worm	2853.47	2157.06	1833	2471	2053.22	103.842
			Background	63483.7	1984.25	1772	2217
			Background	103479	2091.89	1769	2406
			Background	96623.9	2057.59	1831	2290
			Background	115771	2079.16	1754	2389
191108_PAR6_9h_A-11	10:46:00	1 day, 1:46:00	Worm	2963.95	2025.47	1587	2369	1973.1	106.061
			Background	72684.7	1888.41	1671	2104
			Background	103764	1957.24	1651	2294
			Background	112543	2006.69	1780	2315
			Background	120269	2040.07	1708	2380
191108_PAR6_9h_A-12	10:47:00	1 day, 1:47:00	Worm	3144.51	1925.54	1651	2230	1807.27	118.272
			Background	88473.2	1754.5	1502	1986
			Background	108681	1798.19	1500	2119
			Background	125030	1864.25	1588	2138
			Background	87281.1	1812.14	1611	2050
191108_PAR6_9h_A-13	10:47:00	1 day, 1:47:00	Worm	1082.52	2185.93	1938	2439	1993	192.929
			Background	36507.3	1986.16	1745	2214
			Background	44056.1	2013.17	1769	2243
			Background	67152.6	1992.41	1588	2239
			Background	74083	1980.25	1739	2240
191108_PAR6_9h_A-14	10:47:00	1 day, 1:47:00	Worm	3208.81	2070.36	1657	2399	1982.49	87.8712
			Background	57877.4	1951.03	1739	2177
			Background	97027.9	1961.02	1671	2297
			Background	102057	2008.6	1792	2332
			Background	96668.4	2009.32	1714	2341
191108_PAR6_9h_A-15	10:49:00	1 day, 1:49:00	Worm	3607.03	2046.35	1684	2332	2054.43	-8.08175
			Background	13926	2022.05	1838	2212
			Background	34474.1	2097.4	1852	2334
			Background	14682.1	2021.86	1821	2206
			Background	27085.3	2076.43	1856	2275
191108_PAR6_9h_A-16	11:55:00	1 day, 2:55:00	Worm	3112.35	2057.33	1704	2379	1831.3	226.029
			Background	131832	1832.65	1602	2089
			Background	134223	1819.51	1510	2170
			Background	73215.7	1864.57	1664	2071
			Background	83155.4	1808.46	1577	2065
191108_PAR6_9h_A-17	11:55:00	1 day, 2:55:00	Worm	5763	3930.36	2069	7058	1800.29	2130.07
			Background	54454.2	1768.22	1589	1955
			Background	77675.2	1794.56	1518	2090
			Background	100097	1824.07	1615	2068
			Background	83158.7	1814.34	1545	2077
191108_PAR6_9h_A-18	11:56:00	1 day, 2:56:00	Worm	2863.36	1983.31	1709	2227	1843.69	139.615
			Background	42098.8	1691.39	1514	1894
			Background	43993.4	1880.95	1645	2101
			Background	61403.6	1791.25	1592	2018
			Background	41619.8	2011.17	1825	2210
191108_PAR6_9h_A-19	11:56:00	1 day, 2:56:00	Worm	3310.22	2067.48	1712	2395	1911.85	155.632
			Background	47284.7	1794.6	1601	2024
			Background	47673.8	1905.73	1651	2143
			Background	53568.7	1888.76	1672	2150
			Background	58070.3	2058.29	1834	2259
191108_PAR6_9h_A-20	11:56:00	1 day, 2:56:00	Worm	3862.61	2170.91	1850	2556	2097.02	73.8932
			Background	41991.6	1953.83	1755	2139
			Background	58906.3	2128.64	1859	2396
			Background	75938.1	2062.23	1844	2317
			Background	73694.7	2243.37	1981	2556
191108_PAR6_9h_A-21	11:57:00	1 day, 2:57:00	Worm	3203.04	2245.39	1941	2535	2039.67	205.72
			Background	54091.4	1979.78	1790	2210
			Background	119250	2046.84	1735	2378
			Background	122106	2068.31	1834	2350
			Background	129236	2063.75	1744	2398
191108_PAR6_9h_A-22	11:57:00	1 day, 2:57:00	Worm	1193.82	2264.51	2044	2544	2073.57	190.94
			Background	54597.7	2134.15	1913	2452
			Background	52218.3	1935.88	1678	2223
			Background	84527.4	2183.84	1910	2430
			Background	74676.7	2040.4	1717	2343
191108_PAR6_9h_A-23	13:08:00	1 day, 4:08:00	Worm	2635.81	2058.01	1739	2356	1880.08	177.928
			Background	65182.1	1832.82	1628	2068
			Background	100391	1862.39	1547	2193
			Background	100172	1928.01	1726	2152
			Background	109528	1897.11	1613	2200
191108_PAR6_9h_A-24	13:08:00	1 day, 4:08:00	Worm	3619.4	1993.94	1674	2435	1872.41	121.529
			Background	143935	1825.51	1595	2172
			Background	80170.9	1848.2	1566	2129
			Background	137956	1907.69	1679	2183
			Background	156239	1908.23	1583	2220
191108_PAR6_9h_A-25	13:08:00	1 day, 4:08:00	Worm	5997.98	2579.48	1828	4079	1761.17	818.307
			Background	60387.9	1749.24	1549	1950
			Background	86868.8	1744.4	1458	2060
			Background	91020.8	1806.07	1606	2025
			Background	61425.9	1744.98	1527	2003
191108_PAR6_9h_A-26	13:09:00	1 day, 4:09:00	Worm	3988.76	2058.09	1729	2395	1900.68	157.413
			Background	138193	1848.99	1611	2171
			Background	129286	1898.75	1595	2273
			Background	134582	1916.35	1716	2178
			Background	129342	1938.62	1637	2381
191108_PAR6_9h_A-27	13:09:00	1 day, 4:09:00	Worm	3393.49	1960.34	1736	2206	1734.7	225.632
			Background	96229.8	1705.83	1521	1927
			Background	86806.2	1706.06	1451	2004
			Background	95308	1753.46	1508	1986
			Background	123863	1773.47	1517	2059
191108_PAR6_9h_A-28	13:10:00	1 day, 4:10:00	Worm	3288.79	2238.36	1863	2543	2010.27	228.084
			Background	122062	1981.99	1289	2300
			Background	76835.9	1978.49	1658	2297
			Background	80909.6	2017.83	1794	2270
			Background	144136	2062.78	1711	2403
191108_PAR6_9h_A-29	13:10:00	1 day, 4:10:00	Worm	1639.86	2226.73	1991	2413	1976.54	250.19
			Background	97633	1949.55	1728	2208
			Background	141979	1997.82	1571	2424
			Background	75454.9	1982.69	1792	2194
			Background	88639.8	1976.09	1679	2274
191108_PAR6_9h_A-30	13:11:00	1 day, 4:11:00	Worm	4061.31	2002.78	1660	2324	1798.24	204.539
			Background	106258	1762.5	1548	2055
			Background	178091	1781.38	1467	2132
			Background	120642	1830.16	1611	2083
			Background	100420	1818.91	1569	2118
191108_PAR6_9h_A-31	13:12:00	1 day, 4:12:00	Worm	1190.53	2087.99	1871	2321	1924.81	163.172
			Background	39676.5	1841.92	1654	2075
			Background	56729.7	2004.99	1752	2238
			Background	73308.9	1902.82	1494	2137
			Background	57644.9	1949.52	1716	2186
191108_PAR6_9h_A-32	13:55:00	1 day, 4:55:00	Worm	2594.59	2044.14	1813	2280	1876.24	167.906
			Background	58424	1871.48	1637	2092
			Background	81142.1	1880.43	1621	2168
			Background	60063	1899.25	1691	2107
			Background	68020.8	1853.79	1592	2125
191108_PAR6_9h_A-33	13:55:00	1 day, 4:55:00	Worm	3072.78	1817.74	1500	2089	1719.87	97.8697
			Background	89055.3	1667.29	1488	1876
			Background	152044	1733.18	1438	2078
			Background	135166	1740.3	1509	2072
			Background	112750	1738.74	1469	2016
191108_PAR6_9h_A-34	13:55:00	1 day, 4:55:00	Worm	3437.19	1932.31	1679	2151	1744.97	187.343
			Background	105660	1718.54	1525	1946
			Background	104938	1712.19	1479	2021
			Background	127983	1785.83	1571	2007
			Background	126390	1763.31	1480	2058
191108_PAR6_9h_A-35	13:56:00	1 day, 4:56:00	Worm	912.682	2016.32	1750	2235	1827.62	188.694
			Background	71906.5	1800.84	1597	2022
			Background	104779	1820.04	1523	2136
			Background	97438.5	1869.02	1676	2120
			Background	87716.4	1820.6	1561	2070
191108_PAR6_9h_A-35-02	13:56:00	1 day, 4:56:00	Worm	3680.41	2025.68	1679	2363	1827.62	198.055
			Background	71906.5	1800.84	1597	2022
			Background	104779	1820.04	1523	2136
			Background	97438.5	1869.02	1676	2120
			Background	87716.4	1820.6	1561	2070
191108_PAR6_9h_A-36	13:56:00	1 day, 4:56:00	Worm	5135.59	2015.89	1691	2372	1748.71	267.177
			Background	75062.5	1698.12	1515	1923
			Background	113882	1764.37	1494	2058
			Background	138305	1777.02	1539	2042
			Background	101791	1755.33	1477	2033
191108_PAR6_9h_A-37	13:56:00	1 day, 4:56:00	Worm	3143.68	2200.62	1918	6144	2002.15	198.474
			Background	72223	1927.19	1719	2196
			Background	127571	2002.15	1682	2397
			Background	88432	1997.88	1808	2224
			Background	84682.3	2081.37	1808	2364
191108_PAR6_9h_A-38	13:57:00	1 day, 4:57:00	Worm	1313.37	2252.06	2009	2490	1983.65	268.408
			Background	200382	1971.54	1695	2282
			Background	157957	1988.14	1651	2352
			Background	76229.9	1970.75	1717	2253
			Background	120919	2004.17	1663	2340
191108_PAR6_9h_A-39	16:36:00	1 day, 7:36:00	Worm	3290.44	1921.48	1682	2189	1766.84	154.636
			Background	91431.4	1701.56	1484	1979
			Background	118248	1730.15	1467	2093
			Background	111527	1803.64	1576	2064
			Background	129039	1832.01	1569	2114
191108_PAR6_9h_A-40	16:38:00	1 day, 7:38:00	Worm	3597.96	2038.84	1804	2309	1818.89	219.945
			Background	115359	1760.29	1555	2027
			Background	170714	1805.73	1474	2174
			Background	189079	1847.3	1603	2110
			Background	170908	1862.26	1552	2172
191108_PAR6_9h_A-41	16:38:00	1 day, 7:38:00	Worm	6110.1	1982.36	1675	2355	1807.95	174.413
			Background	117592	1775.64	1490	2073
			Background	171423	1814.53	1495	2176
			Background	140146	1828.39	1579	2101
			Background	157638	1813.23	1446	2324
191108_PAR6_9h_A-42	16:39:00	1 day, 7:39:00	Worm	4555.99	2034.96	1683	2366	1912.85	122.111
			Background	94355	1858.27	1645	2108
			Background	131807	1885.74	1566	2272
			Background	140621	1949.76	1704	2208
			Background	170590	1957.63	1642	2295
191108_PAR6_9h_A-43	16:39:00	1 day, 7:39:00	Worm	3517.99	2197.33	1839	2551	2019.25	178.077
			Background	111865	1977.26	1727	2271
			Background	92351.5	1972.81	1672	2297
			Background	131827	2041.23	1823	2321
			Background	180963	2085.72	1734	2468
191108_PAR6_9h_A-44	16:40:00	1 day, 7:40:00	Worm	1673.66	2300.15	2074	2528	2050.88	249.272
			Background	35346.4	2012.02	1803	2279
			Background	64094.7	1969.31	1698	2306
			Background	31995.8	2118.56	1890	2335
			Background	58398.4	2103.6	1794	2375
191108_PAR6_9h_A-45	16:40:00	1 day, 7:40:00	Worm	1247.41	2129.81	1929	2374	1864.2	265.612
			Background	57014.2	1802.23	1597	2017
			Background	132917	1863.8	1546	2187
			Background	123261	1929.4	1701	2221
			Background	87409.7	1861.36	1631	2141
191108_PAR6_9h_A-46	16:40:00	1 day, 7:40:00	Worm	3452.86	2052.62	1733	2504	1874	178.626
			Background	47700.2	1859.69	1662	2070
			Background	90229.3	1810.67	1539	2300
			Background	155240	1895.5	1555	2258
			Background	86166.4	1930.12	1337	2141
191108_PAR6_9h_A-47	17:36:00	1 day, 8:36:00	Worm	7545.49	1921.84	1628	2217	1864.6	57.2383
			Background	163785	1787.67	1540	2067
			Background	167201	1867.08	1533	2221
			Background	160157	1921.46	1394	2242
			Background	163943	1882.2	1608	2176
191108_PAR6_9h_A-48	17:37:00	1 day, 8:37:00	Worm	3579.82	2011.15	1742	2272	1874.04	137.101
			Background	67672	1791.02	1593	2038
			Background	182507	1897.53	1555	2271
			Background	196971	1951.39	1609	2280
			Background	131789	1856.24	1011	2130
191108_PAR6_9h_A-49	17:37:00	1 day, 8:37:00	Worm	4649.98	2010.15	1673	2365	1935.13	75.0213
			Background	86281.8	1885.52	1654	2151
			Background	190695	1973.34	1621	2342
			Background	209496	1991.39	1643	2340
			Background	111570	1890.28	1676	3750
191108_PAR6_9h_A-50	17:37:00	1 day, 8:37:00	Worm	3291.26	1937.36	1702	2210	1849.32	88.0395
			Background	30760.8	1755.12	1564	1955
			Background	27807.5	1857.2	1655	2085
			Background	21864.8	1820.29	1588	2057
			Background	29456.5	1964.65	1782	2165
191108_PAR6_9h_A-51	17:37:00	1 day, 8:37:00	Worm	2521.21	1948.42	1702	2217	1768.89	179.527
			Background	127244	1725.53	1515	1967
			Background	173246	1796.48	1487	2155
			Background	134545	1762.63	1545	2017
			Background	151466	1790.91	1518	2145
191108_PAR6_9h_A-52	17:38:00	1 day, 8:38:00	Worm	1461.78	2208.22	2028	2428	1952.57	255.645
			Background	100123	1900.42	1669	2181
			Background	116085	1946.35	1654	2282
			Background	160424	2002.45	1683	2354
			Background	81569.2	1961.06	1757	2181
191108_PAR6_9h_A-53	17:38:00	1 day, 8:38:00	Worm	3175.84	2249.4	2000	2593	2033.09	216.312
			Background	36911.3	1915.6	1707	2152
			Background	59122.3	2030.71	1767	2275
			Background	80488.3	2177.08	1899	2426
			Background	80889.8	2008.96	1768	2274

## Sheet: Control 13
File	Time	H development		Area	Mean Intensity	Min	Max	Average background	Corrected intenisty		H development	Corrected intenisty	St dev
191108_PAR6_13h_C-14	12:36:00	23:36:00	Worm	6781.22	7620.46	2551	16383	2366.15	5254.31		22:45:00	2661.19	897.732	11:00:00
			Background	69757.1	2261.13	1944	2619				23:55:00	5023.36	597.897
			Background	113838	2347	1975	2768				1 day, 0:58:00	5282.63	1408.31
			Background	78673.7	2453.03	2165	2776				1 day, 4:30:00	3870.53	1168.08
			Background	122977	2403.43	2132	2756				1 day, 3:30:00	4618.87	1703.85
191108_PAR6_13h_C-15	11:45:00	22:45:00	Worm	5237	5772	2485	10488	2217.03	3554.96
			Background	104961	2205.04	1981	2477
			Background	78973.8	2187.64	1882	2559				27:30+28:04	5203.56	1884.4
			Background	74358.4	2225.56	1948	2521
			Background	98248.9	2249.9	1994	2528
191108_PAR6_13h_C-16	11:45:00	22:45:00	Worm	5688.8	4908.89	2846	8252	2400.27	2508.62
			Background	132871	2362.98	2067	2728
			Background	110669	2358.99	1974	2805				8374.22
			Background	87986.8	2422.91	2036	2776				4143.45
			Background	116366	2456.21	2182	2799				5431.78
191108_PAR6_13h_C-17	11:45:00	22:45:00	Worm	5761.35	5317.5	2797	9737	2269.45	3048.04
			Background	103037	2249.13	1968	2656
			Background	120632	2221.12	1905	2664
			Background	141396	2299.7	1936	2726
			Background	115094	2307.86	2072	2579
191108_PAR6_13h_C-18	11:46:00	22:46:00	Worm	4907.21	3523.42	2692	5277	2510.88	1012.54
			Background	162789	2518.26	2173	2945
			Background	100535	2452.93	2093	2903
			Background	100707	2516.67	2144	2929
			Background	110266	2555.64	2294	2856
191108_PAR6_13h_C-19	11:47:00	22:47:00	Worm	5845.45	5100.4	2753	9732	2498.53	2601.87
			Background	124797	2478.45	2187	2863
			Background	81725	2418.29	2047	2806
			Background	89797.3	2526.29	2186	2889
			Background	153441	2571.09	2284	2963
191108_PAR6_13h_C-20	11:47:00	22:47:00	Worm	5985.61	5666.91	2645	10543	2425.81	3241.1
			Background	106217	2398.12	2132	2720
			Background	97530.8	2381.94	2010	2817
			Background	112223	2441.81	2098	2829
			Background	141547	2481.37	2066	2847
191108_PAR6_13h_C-21	12:56:00	23:56:00	Worm	5827.31	7398.58	2833	15162	2285.54	5113.04
			Background	77169.8	2235.48	1895	2542
			Background	132554	2253.12	1878	2606
			Background	148667	2342.64	2011	2688
			Background	142550	2310.94	2044	2636
191108_PAR6_13h_C-22	12:56:00	23:56:00	Worm	6824.91	6395.13	2752	12973	2422.33	3972.8
			Background	120639	2381.15	2071	2779
			Background	100667	2395.14	1997	2808
			Background	109156	2504.99	2157	2862
			Background	96419.4	2408.05	2194	2691
191108_PAR6_13h_C-23	12:57:00	23:57:00	Worm	6193.37	8034.42	2867	16383	2223.87	5810.55
			Background	81754.7	2165.31	1927	2393
			Background	85172.1	2184.64	1860	2563
			Background	136432	2284.62	1920	2647
			Background	62187.7	2260.89	2038	2505
191108_PAR6_13h_C-24	12:57:00	23:57:00	Worm	6100.21	7172.11	2749	15353	2200.02	4972.09
			Background	131189	2139.72	1885	2517
			Background	107711	2197.33	1867	2565
			Background	125236	2280.5	1773	2636
			Background	151438	2182.53	1906	2518
191108_PAR6_13h_C-25	12:57:00	23:57:00	Worm	6196.67	7181.71	2718	14719	2164.31	5017.4
			Background	101640	2080.91	1786	2412
			Background	109044	2093.73	1764	2463
			Background	162442	2240.16	1858	2633
			Background	85806.9	2242.43	1999	2480
191108_PAR6_13h_C-26	13:57:00	1 day, 0:57:00	Worm	5744.04	5102.38	2520	9592	2244.4	2857.98
			Background	93909.8	2236.86	1908	2611
			Background	68456.9	2155.14	1895	2517
			Background	123858	2264.88	1898	2686
			Background	145752	2320.74	2031	2621
191108_PAR6_13h_C-27	13:47:00	1 day, 0:47:00	Worm	6091.14	8215.8	2715	16383	2304.97	5910.83
			Background	130595	2283.66	1985	2650
			Background	129012	2227.61	1899	2691
			Background	190642	2345.83	1946	2782
			Background	109522	2362.79	2107	2639
191108_PAR6_13h_C-28	13:47:00	1 day, 0:47:00	Worm	6876.85	8687.74	2432	16383	2198.25	6489.49
			Background	115504	2175.36	1914	2488
			Background	118294	2118.91	1821	2590
			Background	174127	2251.61	1854	2671
			Background	192489	2247.13	1942	2558
191108_PAR6_13h_C-29	13:57:00	1 day, 0:57:00	Worm	6006.22	8509.02	2905	16383	2264.15	6244.86
			Background	96745.9	2180.67	1940	2461
			Background	148198	2281.51	1924	2663
			Background	118835	2344.48	1978	2708
			Background	116719	2249.94	1980	2606
191108_PAR6_13h_C-30	13:49:00	1 day, 0:49:00	Worm	4959.98	6772.53	2669	13183	2447.98	4324.55
			Background	92987.2	2382.85	2124	2750
			Background	134008	2447.97	1991	2872
			Background	134186	2524.49	2141	2934
			Background	87763.4	2436.59	2178	2765
191108_PAR6_13h_C-31	13:49:00	1 day, 0:49:00	Worm	6156.27	8207.49	2839	16383	2339.41	5868.08
			Background	144743	2370.83	2101	2719
			Background	68677.9	2266.68	1939	2640
			Background	113446	2336.25	1949	2763
			Background	70537	2383.87	2170	2596
191108_PAR6_13h_C-32	17:14:00	1 day, 4:14:00	Worm	5903.16	7683.76	2659	16383	2369.48	5314.29
			Background	107449	2320.78	2028	2627
			Background	128048	2373.75	1990	2810
			Background	161235	2392.76	2003	2856
			Background	114403	2390.62	2139	2719
191108_PAR6_13h_C-33	13:49:00	1 day, 0:49:00	Worm	6047.44	8023.9	2646	16383	2408.12	5615.78
			Background	104773	2346.18	2072	2676
			Background	123155	2383.54	1957	2855
			Background	72463.8	2397.85	2031	2737
			Background	87469	2504.91	2213	2811
191108_PAR6_13h_C-34	17:14:00	1 day, 4:14:00	Worm	6255.21	7362.98	2616	16383	2263.62	5099.36
			Background	91973.1	2209.95	1979	2515
			Background	116519	2241.75	1911	2585
			Background	134231	2315.08	1989	2661
			Background	114955	2287.72	2043	2589
191108_PAR6_13h_C-35	16:28:00	1 day, 3:28:00	Worm	7947.01	5608.97	2527	13017	2431.7	3177.27
			Background	128194	2415.12	2128	2792
			Background	68166.7	2343.01	2038	2763
			Background	125912	2484.51	2125	2874
			Background	68780.1	2484.17	2231	2738
191108_PAR6_13h_C-36	16:28:00	1 day, 3:28:00	Worm	4811.57	9138.42	2700	16383	2398.51	6739.92
			Background	81311.9	2307.36	1981	2654
			Background	79989.5	2362.63	2021	2754
			Background	169887	2478.08	2079	2859
			Background	115310	2445.96	2172	2801
191108_PAR6_13h_C-37	16:28:00	1 day, 3:28:00	Worm	7139.03	5587.23	2469	11019	2283.14	3304.1
			Background	76800.5	2169.74	1930	2460
			Background	53187.8	2246.95	1893	2569
			Background	78535.1	2376.75	2084	2686
			Background	63183.6	2339.1	2073	2621
191108_PAR6_13h_C-38	16:28:00	1 day, 3:28:00	Worm	5980.66	7642.58	2739	16383	2388.39	5254.18
			Background	66375.1	2317.75	1992	2727
			Background	28978.3	2302.32	2018	2567
			Background	42171.3	2428.68	2163	2679
			Background	50275	2504.82	2276	2758
191108_PAR6_13h_C-39	17:29:00	1 day, 4:29:00	Worm	5993.03	6603.31	2793	14838	2354.72	4248.58
			Background	118010	2276.02	1966	2685
			Background	119547	2304.7	1907	2735
			Background	228977	2438.94	2031	2832
			Background	159326	2399.23	2089	2775
191108_PAR6_13h_C-40	17:29:00	1 day, 4:29:00	Worm	4789.31	6965.17	2934	15924	2354.09	4611.08
			Background	159781	2384.14	2087	2800
			Background	53913.4	2306.05	1997	2647
			Background	132138	2414.69	2027	2862
			Background	74102.8	2311.47	2078	2553
191108_PAR6_13h_C-41	17:29:00	1 day, 4:29:00	Worm	7618.87	5766.76	2618	12774	2503.42	3263.34
			Background	52114.4	2405.17	2156	2683
			Background	58530.3	2595.81	2279	2911
			Background	49129.8	2468.51	2181	2795
			Background	38622.8	2544.16	2288	2822
191108_PAR6_13h_C-42	17:30:00	1 day, 4:30:00	Worm	7120.9	5994.31	2639	12354	2215.76	3778.55
			Background	91812.3	2253.48	1992	2595
			Background	72198.3	2144.72	1850	2455
			Background	111916	2256.87	1954	2585
			Background	54226.6	2207.97	1969	2442
191108_PAR6_13h_C-43	17:30:00	1 day, 4:30:00	Worm	9502.77	4341.61	2631	7960	2249.07	2092.54
			Background	214743	2258.54	1970	2670
			Background	54493.8	2193.6	1942	2527
			Background	118802	2272.16	1966	2662
			Background	120619	2271.98	2059	2530
191108_PAR6_13h_C-44	17:31:00	1 day, 4:31:00	Worm	8191.05	5089.68	2763	11065	2533.21	2556.47
			Background	118934	2476.4	2147	2849
			Background	182111	2562.22	2104	3056
			Background	69815.6	2566.25	2218	2908
			Background	106109	2527.98	2295	2804

## Sheet: Auxin 13
File	Time	H development		Area	Mean Intensity	Min	Max	Average background	Corrected intenisty				File	H development	Corrected intensity		H development	Corrected intenisty	St dev
191108_PAR6_13h_A-16	11:48:00	22:48:00	Worm	2428.87	2133.22	1759	2633	1697.38	435.847		11:00:00		191108_PAR6_13h_A-16	22:48:00	435.847		22:50:00	685.191	761.562
			Background	97887	1677.4	1458	1912						191108_PAR6_13h_A-17	22:49:00	123.474		1 day, 0:00:00	615.301	731.693
			Background	85229.8	1677.84	1394	1958						191108_PAR6_13h_A-18	22:49:00	1113.91		1 day, 0:50:00	425.714	469.789
			Background	123340	1709.26	1423	2006						191108_PAR6_13h_A-19	22:49:00	272.402
			Background	144775	1725.01	1499	2001						191108_PAR6_13h_A-20	22:50:00	260.187
191108_PAR6_13h_A-17	11:49:00	22:49:00	Worm	2948.28	1883.38	1575	2228	1759.91	123.474				191108_PAR6_13h_A-21	22:50:00	644.67
			Background	90051.3	1732.16	1498	1971						191108_PAR6_13h_A-22	22:51:00	2399.73
			Background	71451.4	1755.48	1482	2031						191108_PAR6_13h_A-23	22:52:00	231.302
			Background	110175	1784.19	1487	2079						191108_PAR6_13h_A-24	1 day, 0:57:00	176.824
			Background	126829	1767.8	1556	2004						191108_PAR6_13h_A-25	1 day, 0:00:00	121.446
191108_PAR6_13h_A-18	11:49:00	22:49:00	Worm	2774.32	2835.98	1867	4636	1722.07	1113.91				191108_PAR6_13h_A-26	1 day, 0:00:00	1514.24
			Background	100825	1692.94	1488	1956						191108_PAR6_13h_A-27	1 day, 0:01:00	259.019
			Background	103564	1739.3	1481	2069						191108_PAR6_13h_A-28	1 day, 0:02:00	1836.79
			Background	117780	1755.69	1496	2021						191108_PAR6_13h_A-29	1 day, 0:02:00	212.675
			Background	84913.2	1700.34	1497	1913						191108_PAR6_13h_A-30	1 day, 0:02:00	218.591
191108_PAR6_13h_A-19	11:49:00	22:49:00	Worm	1146.01	2176.74	1932	2458	1904.34	272.402				191108_PAR6_13h_A-31	1 day, 0:02:00	144.343
			Background	108697	1884.3	1114	2148						191108_PAR6_13h_A-32	1 day, 0:51:00	1318.65
			Background	111860	1909.69	1609	2231						191108_PAR6_13h_A-33	1 day, 0:51:00	94.571
			Background	115458	1915.47	1649	2235						191108_PAR6_13h_A-34	1 day, 0:51:00	149.743
			Background	129507	1907.89	1681	2176						191108_PAR6_13h_A-35	1 day, 0:52:00	275.157
191108_PAR6_13h_A-20	11:50:00	22:50:00	Worm	2001.8	2258.33	2031	2484	1998.14	260.187				191108_PAR6_13h_A-36	1 day, 0:52:00	1175.44
			Background	77763.4	1954.84	1727	2180						191108_PAR6_13h_A-37	1 day, 0:52:00	237.342
			Background	92068.7	1948.26	1676	2275						191108_PAR6_13h_A-38	1 day, 0:52:00	198.01
			Background	134882	2029.74	1704	2342						191108_PAR6_13h_A-39	1 day, 0:52:00	205.679
			Background	118418	2059.73	1821	2343
191108_PAR6_13h_A-21	11:50:00	22:50:00	Worm	4466.95	2684.62	1968	3970	2039.95	644.67
			Background	79699.3	1972.86	1103	2252
			Background	143724	2026.85	1676	2391
			Background	207557	2107.51	1761	2490
			Background	115112	2052.59	1777	2301
191108_PAR6_13h_A-22	11:51:00	22:51:00	Worm	3125.54	4426.41	2403	8496	2026.68	2399.73
			Background	97738.6	2002.02	1784	2289
			Background	90597.1	1982.06	1683	2308
			Background	146391	2053.41	1736	2431
			Background	116546	2069.23	1859	2343
191108_PAR6_13h_A-23	11:52:00	22:52:00	Worm	3638.36	2187.44	1862	2503	1956.14	231.302
			Background	127429	1919.66	1668	2243
			Background	120331	1928.62	1627	2295
			Background	112549	1974.07	1648	2273
			Background	123851	2002.19	1791	2255
191108_PAR6_13h_A-24	13:57:00	1 day, 0:57:00	Worm	3061.24	1841.92	1536	2110	1665.1	176.824
			Background	63538.1	1586.5	1404	1813
			Background	97487.9	1662.65	1418	1939
			Background	51585.1	1713.51	1518	1919
			Background	97464	1697.75	1519	1932
191108_PAR6_13h_A-25	13:00:00	1 day, 0:00:00	Worm	3480.89	1753.94	1497	2083	1632.49	121.446
			Background	91231.9	1607.9	1399	1860
			Background	109705	1637.08	1369	1910
			Background	103027	1649.89	1364	1919
			Background	100526	1635.08	1424	1887
191108_PAR6_13h_A-26	13:00:00	1 day, 0:00:00	Worm	2987.86	3255.32	1796	6398	1741.08	1514.24
			Background	66118.7	1672.65	1480	1961
			Background	77169.8	1753.63	1507	2014
			Background	101033	1777.79	1530	2018
			Background	98605.9	1760.27	1520	2004
191108_PAR6_13h_A-27	13:01:00	1 day, 0:01:00	Worm	1420.55	2136.91	1928	2351	1877.89	259.019
			Background	100976	1814.04	1441	2072
			Background	131980	1868.49	1521	2207
			Background	88629.9	1923.16	1685	2200
			Background	178180	1905.87	1574	2207
191108_PAR6_13h_A-28	13:02:00	1 day, 0:02:00	Worm	3180.78	3852.35	2174	6930	2015.56	1836.79
			Background	43505.3	1937.33	1737	2143
			Background	130180	2035.44	1708	2404
			Background	96821.8	2051.46	1754	2367
			Background	127820	2038	1799	2338
191108_PAR6_13h_A-29	13:02:00	1 day, 0:02:00	Worm	1990.26	2177.24	1946	2488	1964.56	212.675
			Background	58995.3	1899.34	1705	2116
			Background	129607	1987.13	1650	2346
			Background	114455	1977.37	1699	2299
			Background	141478	1994.41	1696	2271
191108_PAR6_13h_A-30	13:02:00	1 day, 0:02:00	Worm	3791.71	2213.36	1809	2599	1994.77	218.591
			Background	89561.5	1964.25	1707	2222
			Background	71011.1	1922.82	1637	2227
			Background	118938	2036.01	1682	2373
			Background	125582	2056.01	1769	2348
191108_PAR6_13h_A-31	13:02:00	1 day, 0:02:00	Worm	4100.88	2213.97	1850	2542	2069.62	144.343
			Background	166420	2036.97	1708	2377
			Background	148443	2055.14	1717	2440
			Background	219400	2108.49	1773	2453
			Background	162571	2077.89	1832	2362
191108_PAR6_13h_A-32	13:51:00	1 day, 0:51:00	Worm	3168.41	3038.06	1802	6019	1719.41	1318.65
			Background	140466	1725.67	1517	2027
			Background	108018	1669.37	1418	1981
			Background	138015	1708.42	1444	2023
			Background	123224	1774.18	1570	2058
191108_PAR6_13h_A-33	13:51:00	1 day, 0:51:00	Worm	3134.61	1714.08	1407	1970	1619.51	94.571
			Background	90793.3	1584.02	1382	1804
			Background	97029.5	1570.61	1334	1823
			Background	135779	1646.25	1316	1917
			Background	156896	1677.15	1474	1914
191108_PAR6_13h_A-34	13:51:00	1 day, 0:51:00	Worm	3260.76	1779.89	1477	2070	1630.15	149.743
			Background	63420.2	1616.21	1439	1814
			Background	63797.9	1555.39	1314	1853
			Background	104473	1647.21	1345	1942
			Background	81875.9	1701.78	1498	1910
191108_PAR6_13h_A-35	13:52:00	1 day, 0:52:00	Worm	1501.35	2138.36	1937	2347	1863.2	275.157
			Background	134407	1841.6	1622	2130
			Background	119979	1809.32	1398	2137
			Background	150731	1890.59	1526	2216
			Background	112665	1911.3	1693	2151
191108_PAR6_13h_A-36	13:52:00	1 day, 0:52:00	Worm	3243.44	3133.51	2122	5174	1958.07	1175.44
			Background	103536	1911.52	1674	2175
			Background	132970	1925.46	1633	2329
			Background	150818	1996.91	1701	2340
			Background	129045	1998.37	1752	2265
191108_PAR6_13h_A-37	13:52:00	1 day, 0:52:00	Worm	1831.13	2198.53	1929	2457	1961.19	237.342
			Background	147643	1913.91	1630	2215
			Background	138926	1928.4	1529	2282
			Background	160868	1992.1	1709	2307
			Background	163820	2010.34	1741	2335
191108_PAR6_13h_A-38	13:52:00	1 day, 0:52:00	Worm	3805.73	2142.88	1815	2589	1944.86	198.01
			Background	98103	1879.88	1657	2178
			Background	92222.9	1913.38	1632	2234
			Background	98777.4	1981.25	1649	2281
			Background	106531	2004.95	1736	2284
191108_PAR6_13h_A-39	13:52:00	1 day, 0:52:00	Worm	3843.65	2163.84	1873	2441	1958.16	205.679
			Background	78489	1924.75	1708	2157
			Background	99232.5	1925.29	1598	2252
			Background	106739	1968.83	1653	2289
			Background	116389	2013.76	1770	2272
191108_PAR6_13h_A-40	16:30:00	1 day, 3:30:00	Worm					#DIV/0!	#DIV/0!
			Background
			Background
			Background
			Background
191108_PAR6_13h_A-41	16:31:00	1 day, 3:31:00	Worm					#DIV/0!	#DIV/0!
			Background
			Background
			Background
			Background
191108_PAR6_13h_A-42	16:31:00	1 day, 3:31:00	Worm					#DIV/0!	#DIV/0!
			Background
			Background
			Background
			Background
191108_PAR6_13h_A-43	16:31:00	1 day, 3:31:00	Worm					#DIV/0!	#DIV/0!
			Background
			Background
			Background
			Background
191108_PAR6_13h_A-44	16:32:00	1 day, 3:32:00	Worm					#DIV/0!	#DIV/0!
			Background
			Background
			Background
			Background
191108_PAR6_13h_A-45	16:33:00	1 day, 3:33:00	Worm					#DIV/0!	#DIV/0!
			Background
			Background
			Background
			Background
191108_PAR6_13h_A-46	16:33:00	1 day, 3:33:00	Worm					#DIV/0!	#DIV/0!
			Background
			Background
			Background
			Background
191108_PAR6_13h_A-47	17:32:00	1 day, 4:32:00	Worm					#DIV/0!	#DIV/0!
			Background
			Background
			Background
			Background
191108_PAR6_13h_A-48	17:32:00	1 day, 4:32:00	Worm					#DIV/0!	#DIV/0!
			Background
			Background
			Background
			Background
191108_PAR6_13h_A-49	17:32:00	1 day, 4:32:00	Worm					#DIV/0!	#DIV/0!
			Background
			Background
			Background
			Background
191108_PAR6_13h_A-50	17:33:00	1 day, 4:33:00	Worm					#DIV/0!	#DIV/0!
			Background
			Background
			Background
			Background
191108_PAR6_13h_A-51	17:33:00	1 day, 4:33:00	Worm					#DIV/0!	#DIV/0!
			Background
			Background
			Background
			Background
191108_PAR6_13h_A-52	17:34:00	1 day, 4:34:00	Worm					#DIV/0!	#DIV/0!
			Background
			Background
			Background
			Background
191108_PAR6_13h_A-53	17:34:00	1 day, 4:34:00	Worm					#DIV/0!	#DIV/0!
			Background
			Background
			Background
			Background

## Sheet: Control 20
File	Time	H development		Area	Mean Intensity	Min	Max	Average background	Corrected intenisty		H development	Corrected intenisty	St dev
191108_PAR6_20h_C-12	11:37:00	15:37:00	Worm	4018.44	5640.33	2468	11303	2215.76	3424.57		15:38:00	3685.06	1092.87		04:00:00
			Background	73934.6	2168.95	1932	2466				16:48:00	4345.83	1459.98
			Background	138030	2203.96	1853	2605				17:38:00	3900.75	1923.14
			Background	107884	2230.66	1975	2485				20:18:00	2235.29	757.704
			Background	105789	2259.48	1917	2616				21:20:00	2827.92	1285.6
191108_PAR6_20h_C-13	10:29:00	14:29:00	Worm	3329.19	4553.24	2248	8700	2129.61	2423.63
			Background	82829	2032.21	1803	2313
			Background	122265	2157.54	1813	2512
			Background	164827	2250.41	1925	2598
			Background	103536	2078.28	1832	2388
191108_PAR6_20h_C-14	11:37:00	15:37:00	Worm	4883.3	7000.89	2588	16383	2343.5	4657.39
			Background	89454.3	2285.9	1910	2564
			Background	134834	2359.26	1947	2772
			Background	106949	2343.95	2027	2696
			Background	135344	2384.91	1853	2753
191108_PAR6_20h_C-15	11:37:00	15:37:00	Worm	4556.81	4432.5	2113	8510	2179.58	2252.92
			Background	79735.6	2137.14	1908	2369
			Background	89635.7	2160.04	1862	2511
			Background	97530.8	2268.44	1894	2562
			Background	56383.4	2152.7	1939	2402
191108_PAR6_20h_C-16	11:38:00	15:38:00	Worm	3588.89	6660.74	2448	16383	2255.38	4405.35
			Background	126361	2247.63	1989	2576
			Background	79389.3	2185.47	1873	2528
			Background	98111.2	2254.2	1926	2654
			Background	139780	2334.24	2091	2675
191108_PAR6_20h_C-17	12:36:00	16:36:00	Worm	3552.61	7918.63	2778	16383	2475.92	5442.71
			Background	85183.6	2403.87	2154	2687
			Background	129612	2457.56	2064	2898
			Background	129861	2545.84	2160	2961
			Background	66240.7	2496.41	2275	2758
191108_PAR6_20h_C-18	12:48:00	16:48:00	Worm	4344.1	4227.2	2459	6930	2297.32	1929.87
			Background	112259	2254.29	2003	2575
			Background	63714.6	2249.66	1974	2560
			Background	85414.5	2330.61	2007	2682
			Background	101350	2354.73	2039	2627
191108_PAR6_20h_C-19	12:48:00	16:48:00	Worm	3304.45	7266.14	2428	16383	2185.23	5080.91
			Background	95707.9	2069.11	1868	2359
			Background	133609	2169.92	1633	2541
			Background	71459.6	2269.16	1950	2566
			Background	130976	2232.73	1950	2548
191108_PAR6_20h_C-20	12:49:00	16:49:00	Worm	4748.91	7770.88	2717	16383	2270.83	5500.05
			Background	60929.5	2179.14	1933	2434
			Background	127587	2316.64	1936	2698
			Background	70463.6	2256.86	1961	2568
			Background	109984	2330.69	2081	2636
191108_PAR6_20h_C-21	12:49:00	16:49:00	Worm	4378.73	5075.41	2604	10514	2306.57	2768.84
			Background	130366	2278.3	1982	2640
			Background	113024	2287.88	1920	2682
			Background	136787	2309.17	1944	2708
			Background	125127	2350.92	2090	2678
191108_PAR6_20h_C-22	12:49:00	16:49:00	Worm	3646.6	5502.02	2750	10508	2274.54	3227.48
			Background	79112.3	2239.35	2004	2497
			Background	103074	2216.84	1887	2618
			Background	108740	2293.71	1988	2741
			Background	84987.4	2348.25	2093	2666
191108_PAR6_20h_C-23	12:50:00	16:50:00	Worm	3409.16	7794.95	2766	16383	2465.8	5329.15
			Background	107259	2368.55	2081	2680
			Background	141099	2526	2117	2967
			Background	86407.1	2505.9	2136	2845
			Background	58579.8	2462.74	2212	2747
191108_PAR6_20h_C-24	12:50:00	16:50:00	Worm	4554.34	7655.47	2665	16383	2167.81	5487.66
			Background	86618.2	2109.42	1863	2376
			Background	103536	2148.17	1774	2550
			Background	131439	2197.71	1838	2550
			Background	92711	2215.94	1993	2462
191108_PAR6_20h_C-25	13:38:00	17:38:00	Worm	4377.9	8150.87	2480	16383	2281.55	5869.32
			Background	132699	2216.35	1934	2605
			Background	133918	2236.99	1876	2688
			Background	174584	2346.59	1972	2743
			Background	124068	2326.27	2067	2656
191108_PAR6_20h_C-26	13:38:00	17:38:00	Worm	2734.75	7972.81	2960	16383	2220.15	5752.66
			Background	95113.5	2073.05	1834	2483
			Background	223852	2238.41	1794	2677
			Background	174931	2321.99	1953	2695
			Background	132508	2247.17	1946	2579
191108_PAR6_20h_C-27	13:39:00	17:39:00	Worm	5098.49	3854.62	2599	5972	2390.51	1464.11
			Background	114818	2337.81	2045	2738
			Background	96069	2432.76	2073	2829
			Background	92960	2429.92	2083	2803
			Background	86502.8	2361.56	2113	2653
191108_PAR6_20h_C-28	13:39:00	17:39:00	Worm	4617.82	5007.44	2643	9761	2343.75	2663.69
			Background	138208	2251.28	2016	2604
			Background	142467	2341.67	1926	2747
			Background	160617	2416.73	2027	2809
			Background	79002.6	2365.34	2029	2635
191108_PAR6_20h_C-29	13:40:00	17:40:00	Worm	4055.54	6165.23	2624	16160	2411.23	3754
			Background	118934	2349.73	2096	2670
			Background	61669.9	2310.6	1990	2644
			Background	167172	2477.56	2073	2867
			Background	186131	2507.03	2178	2909
191108_PAR6_20h_C-30	16:17:00	20:17:00	Worm	4954.2	4611.98	2455	8137	2143.71	2468.27
			Background	79544.3	2035.16	1827	2298
			Background	151385	2093.62	1764	2420
			Background	76259.6	2279.26	1969	2607
			Background	104326	2166.77	1899	2508
191108_PAR6_20h_C-31	16:18:00	20:18:00	Worm	3636.71	5280.25	2498	10681	2377.84	2902.41
			Background	138348	2320.99	2003	2815
			Background	134742	2370.39	2001	2763
			Background	93964.2	2419.68	2058	2749
			Background	93157.8	2400.3	2012	2709
191108_PAR6_20h_C-32	16:18:00	20:18:00	Worm	5860.29	3806.1	2411	6430	2370.07	1436.03
			Background	116292	2333.88	2071	2679
			Background	189627	2364.77	1934	2783
			Background	141630	2424.74	2045	2771
			Background	105637	2356.9	2098	2659
191108_PAR6_20h_C-33	16:19:00	20:19:00	Worm	6800.18	5115.81	2411	11973	2171.58	2944.23
			Background	94160.4	2140.9	1897	2430
			Background	84214.1	2116.46	1817	2422
			Background	125737	2198.53	1827	2592
			Background	110561	2230.43	1991	2526
191108_PAR6_20h_C-34	16:19:00	20:19:00	Worm	6185.13	3975.72	2662	6709	2550.19	1425.53
			Background	70640.1	2434.47	2211	2703
			Background	138925	2565.23	2012	3012
			Background	122773	2617.81	2265	3001
			Background	137191	2583.24	2298	2939
191108_PAR6_20h_C-35	17:14:00	21:14:00	Worm	7935.47	5869.87	2850	12953	2577.61	3292.27
			Background	148898	2551.98	1395	2977
			Background	103319	2534.97	2121	2963
			Background	130292	2603.68	2226	2997
			Background	106745	2619.79	2328	2985
191108_PAR6_20h_C-36	17:21:00	21:21:00	Worm	8134.99	7284.28	2743	16383	2550.89	4733.39
			Background	176229	2495.39	2159	2923
			Background	79379.4	2509	2162	2884
			Background	182487	2614.07	976	3032
			Background	81120.7	2585.1	2329	2879
191108_PAR6_20h_C-37	17:21:00	21:21:00	Worm	5973.24	3924.57	2498	7348	2385.81	1538.77
			Background	95571.9	2352.94	2088	2714
			Background	58613.6	2282.14	2026	2607
			Background	96825.1	2401.84	2050	2787
			Background	66183.9	2506.3	2224	2908
191108_PAR6_20h_C-38	17:21:00	21:21:00	Worm	6071.35	5254.53	2510	10501	2333.81	2920.72
			Background	162663	2315.75	2040	2680
			Background	93860.3	2269.26	1940	2743
			Background	82156.2	2291.92	1992	2640
			Background	159669	2458.3	1912	2788
191108_PAR6_20h_C-39	17:22:00	21:22:00	Worm	6524.81	4831.15	2556	9152	2387.96	2443.2
			Background	113999	2356.27	2065	2704
			Background	72539.6	2384.54	2061	2771
			Background	68496.5	2398.73	2097	2738
			Background	92195.7	2412.29	2121	2725
191108_PAR6_20h_C-40	17:22:00	21:22:00	Worm	4735.72	4606.61	2663	8405	2321.11	2285.51
			Background	58659	2213.98	2004	2464
			Background	72747.4	2308.51	1996	2640
			Background	85315.5	2429.73	2053	2820
			Background	58992.1	2332.2	2039	2672
191108_PAR6_20h_C-41	17:22:00	21:22:00	Worm	6044.97	3512.67	2324	5479	2323.64	1189.03
			Background	65302.5	2208.03	2004	2454
			Background	58906.3	2396.82	1949	2711
			Background	98846.6	2393.96	2097	2686
			Background	46431.3	2295.74	2077	2499
191108_PAR6_20h_C-42	17:23:00	21:23:00	Worm	7552.09	7294.85	2697	16383	2427.63	4867.22
			Background	116957	2370.38	2105	2713
			Background	133537	2390.94	1998	2832
			Background	103223	2471.31	1125	2833
			Background	95433.4	2477.9	2212	2798
191108_PAR6_20h_C-43	17:23:00	21:23:00	Worm	5105.08	4759.23	2803	8789	2578.06	2181.17
			Background	175462	2554.95	2242	2996
			Background	72099.4	2525.51	2202	2915
			Background	104196	2621.14	2258	3014
			Background	88877.2	2610.66	2373	2904

## Sheet: Auxin 20
File	Time	H development		Area	Mean Intensity	Min	Max	Average background	Corrected intenisty			H development	Corrected intenisty	St dev
191108_PAR6_20h_A-21	12:51:00	16:51:00	Worm	3506.45	2158.74	1810	2619	1879.11	279.627			16:52:00	186.2	70.2172
			Background	62642.8	1764.07	1577	1970					17:44:00	270.402	162.175
			Background	129507	1884.89	1555	2222					20:22:00	681.757	854.587
			Background	70712.6	1964.12	1704	2234					21:24:00	777.932	1105.72
			Background	124699	1903.34	1666	2176
191108_PAR6_20h_A-22	12:52:00	16:52:00	Worm	3353.09	2071.43	1783	2441	1770.84	300.592
			Background	76470.7	1729.31	1555	1918
			Background	57389.3	1729.95	1507	1983
			Background	127383	1812.47	1525	2098
			Background	144050	1811.62	1586	2119
191108_PAR6_20h_A-23	12:53:00	16:53:00	Worm	1085.82	1940.61	1775	2151	1748.49	192.123
			Background	75448.4	1717.89	1535	1916
			Background	108424	1722.26	1435	2027
			Background	88632.4	1775.22	1512	2050
			Background	85711.3	1778.57	1587	2002
191108_PAR6_20h_A-24	12:53:00	16:53:00	Worm	1615.12	2021.24	1862	2237	1791.37	229.869
			Background	110208	1800.82	1563	2103
			Background	50566	1782	1552	2043
			Background	50378.1	1793.08	1583	2018
			Background	41070.7	1789.59	1611	1984
191108_PAR6_20h_A-25	12:53:00	16:53:00	Worm	1254.01	1823.04	1574	2038	1719.55	103.49
			Background	88183.8	1685.34	1478	1933
			Background	92791.8	1673.33	1387	1944
			Background	85915.7	1758.76	1501	2029
			Background	79624.3	1760.76	1546	1980
191108_PAR6_20h_A-26	12:53:00	16:53:00	Worm	1676.96	2031.12	1776	2227	1886.12	144.995
			Background	93675.6	1894.45	1625	2180
			Background	57135.4	1853.05	1611	2111
			Background	56230.9	1891.74	1663	2141
			Background	32510.3	1905.24	1704	2098
191108_PAR6_20h_A-27	12:53:00	16:53:00	Worm	2460.2	1973.31	1648	2205	1856.25	117.057
			Background	96699.7	1808.06	1592	2073
			Background	53418.7	1872.4	1632	2094
			Background	60519.8	1893.48	1639	2147
			Background	99652.1	1851.07	1613	2112
191108_PAR6_20h_A-28	12:53:00	16:53:00	Worm	1662.94	2028.81	1755	2240	1885.89	142.924
			Background	41471.4	1830.75	1532	2053
			Background	26844.5	1904.19	1684	2118
			Background	37908.9	1925.78	1698	2135
			Background	45470	1882.82	1641	2107
191108_PAR6_20h_A-29	12:54:00	16:54:00	Worm	2956.53	2263.36	1917	2671	2036.7	226.666
			Background	100684	2004.07	1771	2339
			Background	107256	2017.42	1689	2329
			Background	102154	2071.97	1735	2384
			Background	107418	2053.33	1811	2348
191108_PAR6_20h_A-30	12:55:00	16:55:00	Worm	1855.04	1516.33	1331	1709	1391.68	124.653
			Background	65099.7	1361.36	1159	1601
			Background	96056.7	1397.99	1159	1631
			Background	98896.1	1423.88	1202	1652
			Background	78093.2	1383.48	1196	1626
191108_PAR6_20h_A-31	13:43:00	17:43:00	Worm	2009.22	1945.86	1627	2245	1820.23	125.624
			Background	117298	1818.09	1582	2095
			Background	45483.2	1726.72	1489	1960
			Background	62824.2	1774.46	1536	2034
			Background	42969.4	1961.67	1767	2159
191108_PAR6_20h_A-32	13:43:00	17:43:00	Worm	2897.99	2397.39	1914	3230	1844.08	553.311
			Background	134948	1795.93	1571	2059
			Background	87419.6	1885.28	1616	2160
			Background	143265	1866.67	1598	2173
			Background	58174.2	1828.44	1625	2042
191108_PAR6_20h_A-33	13:44:00	17:44:00	Worm	4409.23	2259.14	1746	3116	1758.21	500.93
			Background	170700	1754.62	1506	2094
			Background	76312.4	1712.13	1439	2035
			Background	67223.5	1762.03	1523	1988
			Background	57105.7	1804.07	1588	1997
191108_PAR6_20h_A-34	13:44:00	17:44:00	Worm	1289.46	1892.15	1710	2065	1712.07	180.084
			Background	61735.9	1678.07	1509	1901
			Background	74518.4	1671.01	1453	1903
			Background	64776.5	1718.86	1504	1984
			Background	88523.5	1780.33	1581	1988
191108_PAR6_20h_A-35	13:44:00	17:44:00	Worm	1352.94	1925.18	1661	2212	1758.3	166.877
			Background	76071.6	1712.43	1526	1931
			Background	42219.2	1696.76	1475	1932
			Background	136038	1814.33	1551	2113
			Background	69650.7	1809.68	1559	2114
191108_PAR6_20h_A-36	13:44:00	17:44:00	Worm	1742.09	2020.53	1780	2257	1832.91	187.622
			Background	90846	1820.77	1618	2111
			Background	105281	1784.93	1494	2092
			Background	192217	1860.63	1539	2192
			Background	67493.9	1865.31	1672	2110
191108_PAR6_20h_A-37	13:44:00	17:44:00	Worm	1782.49	2026.53	1877	2187	1801.9	224.63
			Background	74689.8	1748.8	1552	1992
			Background	100255	1744.94	1436	2062
			Background	80969	1836.54	1569	2097
			Background	84926.4	1877.31	1652	2159
191108_PAR6_20h_A-38	13:46:00	17:46:00	Worm	2362.91	1613.76	1413	1990	1389.62	224.136
			Background	134427	1381.14	1179	1642
			Background	76190.4	1410.88	1219	1608
			Background	90031.5	1392.17	1184	1602
			Background	72203.3	1374.29	1193	1560
191108_PAR6_20h_A-39	16:21:00	20:21:00	Worm	3263.23	3991.34	1513	9540	1368.59	2622.75
			Background	42423.6	1316.41	1162	1468
			Background	54810.4	1311.7	1126	1523
			Background	138533	1431.9	1222	1655
			Background	119311	1414.33	1194	1610
191108_PAR6_20h_A-40	16:22:00	20:22:00	Worm	1723.95	1874.48	1673	2133	1791.09	83.3977
			Background	78362	1738.1	1547	2014
			Background	83944.5	1764.32	1519	2035
			Background	93088.6	1830.72	1547	2104
			Background	135057	1831.21	1615	2196
191108_PAR6_20h_A-41	16:22:00	20:22:00	Worm	1426.32	2071.57	1897	2306	1856.84	214.728
			Background	80706.8	1835.65	1602	2101
			Background	77697.5	1870.14	1617	2149
			Background	83971.7	1870.52	1616	2128
			Background	98568	1851.03	1625	2125
191108_PAR6_20h_A-42	16:23:00	20:23:00	Worm	1799.81	2148.26	1836	2455	1938.21	210.053
			Background	110302	1887.13	1624	2179
			Background	99463.3	1917.99	1631	2252
			Background	177609	1993.47	1666	2330
			Background	162834	1954.23	1358	2284
191108_PAR6_20h_A-43	16:23:00	20:23:00	Worm	1439.51	1984.2	1773	2192	1790.53	193.674
			Background	106745	1754.27	1487	2060
			Background	87380	1745.39	1494	2011
			Background	137563	1854.76	1569	2156
			Background	114040	1807.68	1600	2067
191108_PAR6_20h_A-44	16:23:00	20:23:00	Worm	2838.63	1974.21	1700	2339	1812.87	161.334
			Background	135789	1747.33	1492	2041
			Background	136980	1830.44	1542	2148
			Background	122812	1851.02	1566	2127
			Background	115794	1822.7	1608	2117
191108_PAR6_20h_A-45	16:23:00	20:23:00	Worm	1720.66	2026.2	1795	2211	1792.1	234.095
			Background	85896.8	1759.17	1556	1999
			Background	118414	1779.8	1506	2084
			Background	121559	1798.76	1545	2078
			Background	142101	1830.68	1579	2077
191108_PAR6_20h_A-46	16:24:00	20:24:00	Worm	3135.44	3129.43	2014	5045	1839.91	1289.52
			Background	120227	1821.88	1613	2076
			Background	121015	1817.18	1540	2105
			Background	188637	1863.83	1564	2196
			Background	156549	1856.75	1659	2103
191108_PAR6_20h_A-47	16:24:00	20:24:00	Worm	3546.84	2983.55	1891	4876	1857.29	1126.26
			Background	94852.9	1825.76	1600	2090
			Background	90484.9	1805.22	1468	2080
			Background	164332	1879.45	1577	2210
			Background	125238	1918.72	1675	2161
191108_PAR6_20h_A-48	17:24:00	21:24:00	Worm	1944.09	1954.43	1767	2160	1782.45	171.98
			Background	118175	1779.94	1563	2061
			Background	125680	1775.86	1474	2099
			Background	162156	1806.99	1480	2082
			Background	90481.6	1767	1571	1999
191108_PAR6_20h_A-49	17:24:00	21:24:00	Worm	2829.56	2049.66	1853	2317	1847.88	201.784
			Background	91551.8	1849.63	1649	2093
			Background	103502	1816.47	1483	2112
			Background	97220.8	1926.61	1541	2334
			Background	79926.8	1798.81	1598	1987
191108_PAR6_20h_A-50	17:25:00	21:25:00	Worm	1851.75	1966.96	1744	2157	1795.86	171.108
			Background	111131	1752.58	1497	2052
			Background	76724.6	1780.86	1542	2060
			Background	139203	1826.49	1526	2116
			Background	125388	1823.5	1610	2078
191108_PAR6_20h_A-51	17:25:00	21:25:00	Worm	3397.62	2529.38	1979	3716	1999.61	529.769
			Background	64349.4	1918.69	1679	2168
			Background	46143.6	1971.89	1733	2229
			Background	65769.1	2098.63	1841	2344
			Background	50835.6	2009.23	1789	2278
191108_PAR6_20h_A-52	17:26:00	21:26:00	Worm	3335.78	2544.94	2007	3629	1954.55	590.397
			Background	91335.8	1941.09	1731	2226
			Background	70046.5	1885.76	1599	2195
			Background	148938	2008.9	1714	2324
			Background	111477	1982.45	1718	2249
191108_PAR6_20h_A-53	17:27:00	21:27:00	Worm	3303.63	4447.95	1648	9645	1445.4	3002.55
			Background	155327	1436.61	1249	1686
			Background	105775	1432.32	1221	1665
			Background	110439	1479.22	1241	1745
			Background	98520.2	1433.44	1242	1649

## Sheet: Control 22
File	Time	H development		Area	Mean Intensity	Min	Max	Average background	Corrected intenisty		H development	Corrected intenisty	St dev
191108_PAR6_22h_C	09:20:00	11:20:00	Worm	4034.93	4023.72	2037	8895	1836.91	2186.8		11:20:00	1726.79	1074.65								02:00:00
			Background	108335	1845.57	1621	2133				12:15:00	3091.34	1371.56
			Background	140607	1845.38	1508	2205				13:30:00	4587.63	678.146
			Background	148987	1807.5	1433	2172				14:35:00	5032.65	778.653
			Background	132522	1849.2	1632	2140				15:30:00	4704.12	1075.52
191108_PAR6_22h_C-01	09:19:00	11:19:00	Worm	2953.23	4609.74	1717	9813	1633.4	2976.34		18:05:00	2898.23	914.612
			Background	34564.8	1518.94	1210	1699				19:15:00	2240.09	626.02
			Background	71011.1	1687.81	1464	1950
			Background	95497.7	1594.69	1392	1840
			Background	61468.7	1732.17	1522	1955
191108_PAR6_22h_C-02	09:20:00	11:20:00	Worm	2930.14	4975.23	2030	10649	1836.38	3138.85
			Background	138249	1823.84	1580	2104
			Background	102299	1865.9	1538	2179
			Background	94430.8	1831.38	1544	2130
			Background	147162	1824.41	1582	2103
191108_PAR6_22h_C-03	09:21:00	11:21:00	Worm	2954.88	2885.8	2087	4451	1912.01	973.783
			Background	51703.8	1894.89	1713	2121
			Background	76361	1846.54	1571	2164
			Background	146755	1930.33	1588	2312
			Background	140952	1976.3	1763	2268
191108_PAR6_22h_C-04	09:21:00	11:21:00	Worm	3295.38	3339.22	2098	7103	1913.7	1425.52
			Background	109584	1885.17	1661	2138
			Background	102673	1923.92	1628	2266
			Background	94770.5	1942.5	1643	2285
			Background	130910	1903.2	1665	2215
191108_PAR6_22h_C-05	09:21:00	11:21:00	Worm	3158.52	3518.67	2186	6216	2025.79	1492.89
			Background	115131	1990.55	1759	2265
			Background	89677	1962.43	1680	2317
			Background	126239	2059.02	1720	2465
			Background	126829	2091.15	1832	2387
191108_PAR6_22h_C-06	09:21:00	11:21:00	Worm	3836.23	5444.15	2326	13302	1972.09	3472.07
			Background	91423.2	1945.05	1742	2195
			Background	103965	1951.85	1636	2297
			Background	131156	2008.43	1668	2355
			Background	101775	1983.01	1758	2264
191108_PAR6_22h_C-07	09:22:00	11:22:00	Worm	2869.96	2518.82	1991	3277	2033.22	485.594
			Background	41731.1	1929.94	1682	2158
			Background	54866.4	2088.96	1774	2432
			Background	49089.4	2145.12	1871	2428
			Background	57959	1968.87	1781	2193
191108_PAR6_22h_C-08	09:22:00	11:22:00	Worm	3212.94	3460.59	2116	5903	2045.65	1414.94
			Background	80504.8	2003.1	1777	2279
			Background	101224	2029.79	1699	2417
			Background	95294.9	2080.14	1718	2373
			Background	62815.9	2069.56	1854	2306
191108_PAR6_22h_C-08-02	09:22:00	11:22:00	Worm	2854.29	2351.04	2026	2573	2045.65	305.395
			Background	80504.8	2003.1	1777	2279
			Background	101224	2029.79	1699	2417
			Background	95294.9	2080.14	1718	2373
			Background	62815.9	2069.56	1854	2306
191108_PAR6_22h_C-09	09:22:00	11:22:00	Worm	2839.45	3130.05	2148	4833	2007.57	1122.48
			Background	58681.2	1980.12	1698	2294
			Background	68220.3	1957.05	1700	2232
			Background	104538	2083.09	1777	2379
			Background	97234	2010.04	1799	2384
191108_PAR6_22h_C-10	10:14:00	12:14:00	Worm	1952.33	2322.6	2054	2620	2010.93	311.671
			Background	43993.4	1861.25	1681	2100
			Background	53516.8	1997.96	1746	2371
			Background	53326.3	2176.53	1930	2500
			Background	56475.8	2007.98	1778	2271
191108_PAR6_22h_C-11	10:14:00	12:14:00	Worm	3237.67	4914.35	2339	10348	1940.84	2973.51
			Background	87017.2	1876.41	1683	2113
			Background	100558	1913.8	1587	2263
			Background	154894	1967.59	1669	2317
			Background	161879	2005.55	1728	2336
191108_PAR6_22h_C-12	10:15:00	12:15:00	Worm	3151.93	3507.26	1999	5839	2026.63	1480.63
			Background	77083.3	1973.44	1679	2270
			Background	72642.7	2042.5	1781	2325
			Background	94050.7	2094.18	1778	2377
			Background	65159	1996.39	1766	2254
191108_PAR6_22h_C-13	10:15:00	12:15:00	Worm	3710.09	5685.97	2263	12779	1945.09	3740.88
			Background	104357	1886.58	1652	2197
			Background	109489	1919.81	1574	2262
			Background	108413	1996.26	1693	2318
			Background	102797	1977.7	1728	2254
191108_PAR6_22h_C-14	10:15:00	12:15:00	Worm	3522.93	6602.88	2233	15016	1998.85	4604.03
			Background	86187.8	1903.97	1663	2228
			Background	106019	1987.69	1676	2364
			Background	87876.3	2039.67	1732	2365
			Background	173184	2064.09	1763	2414
191108_PAR6_22h_C-15	10:15:00	12:15:00	Worm	3385.25	3560.68	1666	7212	1410.77	2149.91
			Background	120608	1350.32	1166	1567
			Background	114510	1401.4	1119	1748
			Background	101475	1461.81	1239	1696
			Background	92488.4	1429.57	1271	1588
191108_PAR6_22h_C-16	10:15:00	12:15:00	Worm	2794.11	5879.7	2436	12917	1664.21	4215.49
			Background	111131	1578.18	1393	1783
			Background	142611	1641.52	1346	1981
			Background	168203	1738.5	1451	2049
			Background	126751	1698.64	1514	1947
191108_PAR6_22h_C-17	10:16:00	12:16:00	Worm	3059.59	5974.77	2299	12357	1971.74	4003.02
			Background	94727.6	1880.97	1654	2165
			Background	108394	1959.36	1637	2317
			Background	184020	2055.09	1729	2423
			Background	115349	1991.56	1745	2266
191108_PAR6_22h_C-18	10:16:00	12:16:00	Worm	3669.69	5504.9	2567	10816	2034.07	3470.83
			Background	88473.2	2011.95	1714	2333
			Background	113695	2011.57	1698	2363
			Background	138203	2089.6	1780	2456
			Background	136531	2023.15	1797	2353
191108_PAR6_22h_C-19	10:16:00	12:16:00	Worm	3181.61	6141.71	2517	13234	2178.33	3963.39
			Background	119034	2138.83	1856	2451
			Background	115324	2151.05	1804	2528
			Background	201324	2247.97	1864	2651
			Background	117832	2175.46	1908	2460
191108_PAR6_22h_C-20	11:29:00	13:29:00	Worm	3007.64	6264.37	2077	13806	1753.43	4510.94
			Background	73895.1	1683.29	1494	1911
			Background	106999	1723.08	1408	2156
			Background	159091	1814.5	1497	2202
			Background	168428	1792.85	1581	2025
191108_PAR6_22h_C-21	11:29:00	13:29:00	Worm	2978.79	6024.87	2043	13943	1673.43	4351.44
			Background	105929	1598.26	1352	1886
			Background	109340	1669.85	1390	1963
			Background	176303	1752.91	1472	2053
			Background	125134	1672.71	1464	1904
191108_PAR6_22h_C-22	11:29:00	13:29:00	Worm	3220.36	6063.57	2062	12861	1889.85	4173.73
			Background	103589	1786.21	1530	2094
			Background	151372	1924.28	1452	2313
			Background	163244	1971.76	1682	2325
			Background	117506	1877.13	1645	2163
191108_PAR6_22h_C-23	11:30:00	13:30:00	Worm	3624.34	5759.74	2028	13180	1814.88	3944.86
			Background	122100	1759.29	1529	2043
			Background	116497	1749.76	1415	2053
			Background	162367	1927.27	1541	2315
			Background	122166	1823.21	1499	2157
191108_PAR6_22h_C-24	11:30:00	13:30:00	Worm	3548.49	5323.35	2430	10133	1902.37	3420.98
			Background	96091.3	1823.33	1616	2137
			Background	133738	1921.27	1532	2376
			Background	159244	1933.19	1615	2285
			Background	174154	1931.67	1677	2285
191108_PAR6_22h_C-25	11:30:00	13:30:00	Worm	2791.64	7682.72	2754	15588	1908.51	5774.21
			Background	122179	1895.96	1534	2251
			Background	106019	1925.25	1595	2260
			Background	130097	1920.94	1630	2214
			Background	167152	1891.9	1606	2209
191108_PAR6_22h_C-26	11:30:00	13:30:00	Worm	3379.48	6763.81	2362	15483	2030.71	4733.1
			Background	110310	1940.55	1666	2290
			Background	133735	2138.9	1745	2475
			Background	87662	2049.61	1757	2366
			Background	77921.7	1993.79	1764	2197
191108_PAR6_22h_C-27	11:31:00	13:31:00	Worm	2910.36	6749.29	2388	14467	2048.77	4700.52
			Background	134562	2021.84	1747	2375
			Background	85125.9	2022.59	1682	2407
			Background	125302	2061.54	1701	2393
			Background	109533	2089.1	1862	2328
191108_PAR6_22h_C-28	11:31:00	13:31:00	Worm	3555.09	7599.96	2735	16383	2249.43	5350.53
			Background	133044	2213.85	1931	2590
			Background	97958.7	2190.95	1836	2566
			Background	203352	2322.35	1876	2733
			Background	176976	2270.59	1981	2596
191108_PAR6_22h_C-29	11:32:00	13:32:00	Worm	3315.17	6973.68	2870	14158	2057.66	4916.02
			Background	82829	1994.04	1757	2371
			Background	136788	2030.88	1683	2433
			Background	193015	2114.73	1495	2480
			Background	204337	2090.98	1790	2505
191108_PAR6_22h_C-30	12:35:00	14:35:00	Worm	2597.89	5504.33	2413	12392	1808.75	3695.58
			Background	162888	1759.48	1510	2083
			Background	168976	1787.43	1475	2142
			Background	249380	1873.1	1498	2318
			Background	120417	1815.01	1507	2224
191108_PAR6_22h_C-31	12:36:00	14:36:00	Worm	3001.05	6926.15	2310	15150	1762.24	5163.92
			Background	79531.9	1737.72	1540	1960
			Background	114069	1781.06	1482	2114
			Background	141251	1766.54	1463	2083
			Background	132545	1763.63	1555	2039
191108_PAR6_22h_C-32	12:36:00	14:36:00	Worm	2965.6	7623.49	2674	15930	1877.81	5745.68
			Background	171584	1874.54	1614	2220
			Background	63177.9	1899.46	1625	2188
			Background	113413	1835.17	1623	2147
			Background	179608	1902.06	1577	3584
191108_PAR6_22h_C-33	12:37:00	14:37:00	Worm	3635.06	6578.81	2420	13548	1877.58	4701.24
			Background	111501	1786.53	1554	2044
			Background	135422	1866.22	1529	2299
			Background	114403	1925.12	1608	2300
			Background	213840	1932.44	1670	2220
191108_PAR6_22h_C-34	12:37:00	14:37:00	Worm	3084.32	5297.38	2119	11606	1854.93	3442.45
			Background	84407	1850.13	1584	2102
			Background	158525	1878.58	1553	2204
			Background	203548	1867.48	1533	2217
			Background	147246	1823.55	1607	2238
191108_PAR6_22h_C-35	12:37:00	14:37:00	Worm	3780.17	6803.26	2185	14542	1839.71	4963.55
			Background	76642.2	1808.48	1535	2100
			Background	163208	1847.27	1500	2198
			Background	237921	1908.02	1522	2244
			Background	124676	1795.06	1612	2146
191108_PAR6_22h_C-36	12:37:00	14:37:00	Worm	3340.73	6333.25	2341	15676	1861.5	4471.75
			Background	132308	1790.73	1553	2091
			Background	150659	1903.92	1577	2256
			Background	179884	1900.63	1583	2666
			Background	222150	1850.7	1536	2214
191108_PAR6_22h_C-37	12:39:00	14:39:00	Worm	2709.19	7809.7	2751	16383	2065.56	5744.14
			Background	171179	2010.5	1773	2371
			Background	147282	2094.85	1729	2465
			Background	154577	2044.59	1802	2350
			Background	139268	2112.31	1810	2448
191108_PAR6_22h_C-38	12:40:00	14:40:00	Worm	3044.75	7596.48	3011	16383	2018.58	5577.9
			Background	126559	1944.46	1724	2280
			Background	158598	2022.79	1690	2352
			Background	104212	2026.21	1793	2356
			Background	132450	2080.86	1765	2459
191108_PAR6_22h_C-39	12:40:00	14:40:00	Worm	2615.2	7797.72	2446	16383	2082.78	5714.94
			Background	76407.2	1995.6	1708	2357
			Background	105648	2028.01	1730	2369
			Background	96538.1	2147.08	1821	2441
			Background	73964.3	2160.43	1860	2398
191108_PAR6_22h_C-40	12:40:00	14:40:00	Worm	2991.16	7002.46	2560	15882	2057.44	4945.02
			Background	86845.7	1985.65	1770	2262
			Background	135849	2050.35	1707	2454
			Background	199632	2117.1	1749	2506
			Background	168903	2076.66	1776	2424
191108_PAR6_22h_C-41	12:40:00	14:40:00	Worm	3037.32	7657.78	2791	16383	2117.93	5539.85
			Background	78520.3	2035.48	1789	2286
			Background	114520	2090.09	1740	2503
			Background	210451	2187.21	1801	2614
			Background	196783	2158.95	1876	2500
191108_PAR6_22h_C-42	12:40:00	14:40:00	Worm	3351.45	7828.11	2604	16383	2109.69	5718.42
			Background	100133	2044.76	1814	2341
			Background	146474	2100.81	1725	2505
			Background	176961	2137.8	1851	2479
			Background	181114	2155.38	1777	2557
191108_PAR6_22h_C-43	13:27:00	15:27:00	Worm	3250.04	5122.14	1231	12235	1104.54	4017.6
			Background	105507	1245.71	1076	1434
			Background	224836	1045.92	784	1271
			Background	211092	1010.28	746	1249
			Background	133415	1116.25	914	1346
191108_PAR6_22h_C-44	13:28:00	15:28:00	Worm	3136.26	6675.9	2438	14129	1877.42	4798.48
			Background	126044	1800.08	1600	2082
			Background	166817	1882.85	1515	2283
			Background	158102	1898.52	1589	2226
			Background	154628	1928.25	1586	2243
191108_PAR6_22h_C-45	13:28:00	15:28:00	Worm	3052.17	4312.51	2370	8046	1942.5	2370.02
			Background	114416	1851.21	1621	2242
			Background	162991	1947.12	1630	2297
			Background	195893	1989.94	1648	2347
			Background	200971	1981.72	1720	2283
191108_PAR6_22h_C-46	13:29:00	15:29:00	Worm	2880.68	7231.94	2545	16340	1780.98	5450.96
			Background	121165	1717.03	1481	1988
			Background	111418	1773.61	1468	2104
			Background	82815.8	1800.05	1260	2017
			Background	150962	1833.22	1511	2169
191108_PAR6_22h_C-47	13:29:00	15:29:00	Worm	3336.61	7633.06	2187	16383	1875.08	5757.99
			Background	139206	1862.04	1589	2242
			Background	98582.8	1817.37	1539	2128
			Background	112457	1877.47	1607	2273
			Background	138048	1943.43	1580	2302
191108_PAR6_22h_C-48	13:29:00	15:29:00	Worm	3952.48	5524.62	2039	12702	1892.08	3632.54
			Background	129418	1833.11	1610	2146
			Background	158150	1894.46	1551	2282
			Background	146301	1913.91	1681	2189
			Background	129408	1926.83	1611	2276
191108_PAR6_22h_C-49	13:29:00	15:29:00	Worm	3362.99	6964.02	2248	16383	1850.59	5113.43
			Background	129930	1787.45	624	2090
			Background	219360	1854.54	1543	2202
			Background	133778	1873.66	1662	2132
			Background	168544	1886.7	1544	2208
191108_PAR6_22h_C-50	13:30:00	15:30:00	Worm	3103.28	7737.32	2248	16322	1834.57	5902.74
			Background	146827	1789.79	1499	2167
			Background	178678	1853.48	1534	2175
			Background	119554	1845.34	1595	2180
			Background	121513	1849.68	1593	2137
191108_PAR6_22h_C-51	13:30:00	15:30:00	Worm	3453.68	6520.14	2241	14618	1964.34	4555.79
			Background	47954.1	1897.57	1645	2187
			Background	54249.7	1936	1713	2170
			Background	111189	2040.75	1693	2412
			Background	76009	1983.06	1728	2315
191108_PAR6_22h_C-52	13:30:00	15:30:00	Worm	2667.97	7814.23	2420	16383	2061.58	5752.65
			Background	171169	2045.18	1795	2378
			Background	158759	2049.95	1628	2441
			Background	149411	2087.72	1848	2404
			Background	164011	2063.45	1721	2456
191108_PAR6_22h_C-53	13:31:00	15:31:00	Worm	3516.34	6630.77	2698	16383	2237.67	4393.1
			Background	165425	2201.51	1829	2589
			Background	51499.3	2223.33	1942	2510
			Background	131730	2246.2	1960	2578
			Background	176076	2279.64	1903	2698
191108_PAR6_22h_C-54	16:03:00	18:03:00	Worm	3921.15	4990.37	2543	10700	2151.58	2838.79
			Background	141302	2091.68	1821	2424
			Background	133778	2173.58	1818	2595
			Background	98584.5	2188.78	1945	2473
			Background	74083	2152.27	1841	2470
191108_PAR6_22h_C-55	16:06:00	18:06:00	Worm	3387.72	3316.19	2244	4746	2029.98	1286.21
			Background	73799.4	1975.78	1769	2226
			Background	106544	2032.8	1685	2411
			Background	90382.7	2045.63	1833	2297
			Background	67545	2065.72	1818	2340
191108_PAR6_22h_C-56	16:06:00	18:06:00	Worm	3898.07	4213.83	2285	8297	1956.13	2257.7
			Background	235689	1922.66	1492	2291
			Background	171076	1985.35	1588	2461
			Background	103215	2006.72	1768	2347
			Background	103219	1909.79	1662	2277
191108_PAR6_22h_C-57	16:07:00	18:07:00	Worm	4094.29	5033.34	2308	10260	1870.84	3162.5
			Background	92692.8	1861.68	1636	2178
			Background	120029	1840.68	1536	2215
			Background	161272	1854.42	1623	2321
			Background	195741	1926.58	1585	2293
191108_PAR6_22h_C-58	16:07:00	18:07:00	Worm	4627.72	4777.11	2156	9725	1900.31	2876.8
			Background	69710.1	1821.95	1546	2061
			Background	98985.2	1942	1625	2279
			Background	139379	1881.02	1613	2240
			Background	129201	1956.29	1634	2281
191108_PAR6_22h_C-59	16:07:00	18:07:00	Worm	3883.23	4781	2113	9594	1974.1	2806.9
			Background	42855.6	1917.96	1658	2184
			Background	88732.9	2124.16	1891	2359
			Background	50516.6	1833.34	1651	2082
			Background	66848.4	2020.95	1745	2291
191108_PAR6_22h_C-60	16:07:00	18:07:00	Worm	3230.25	7047.4	2416	16383	1903.48	5143.92
			Background	122406	1848.61	1605	2130
			Background	95908.3	1958.12	1668	2285
			Background	82142.2	1925.8	1705	2130
			Background	141501	1881.38	1219	2239
191108_PAR6_22h_C-61	16:08:00	18:08:00	Worm	4040.7	4851.44	2326	9143	1989.42	2862.02
			Background	78581.3	1888.17	1664	2148
			Background	161249	2043.62	1678	2413
			Background	144916	1984.34	1711	2323
			Background	151367	2041.56	1705	2412
191108_PAR6_22h_C-62	16:08:00	18:08:00	Worm	4401.81	5510.21	2401	12959	1968.3	3541.92
			Background	175208	1905.15	1673	2211
			Background	237008	2006.27	1608	2544
			Background	104113	1947.16	1739	2194
			Background	160770	2014.6	1625	2475
191108_PAR6_22h_C-63	16:08:00	18:08:00	Worm	3961.55	5309.42	2506	11755	2079.2	3230.21
			Background	137191	2026.99	1797	2355
			Background	194732	2085.75	1698	2513
			Background	106752	2060.08	1822	2370
			Background	179680	2143.98	1793	2518
191108_PAR6_22h_C-64	16:09:00	18:09:00	Worm	4633.49	4675.22	2570	8529	2198.08	2477.14
			Background	104872	2138.49	1894	2427
			Background	112348	2177.66	1825	2591
			Background	73294.9	2190.79	1960	2557
			Background	183757	2285.38	1907	2720
191108_PAR6_22h_C-65	16:09:00	18:09:00	Worm	4842.08	4518.99	2402	8505	2224.34	2294.65
			Background	119480	2133.67	1870	2508
			Background	79997.7	2267.83	1935	2591
			Background	215907	2269.79	1944	2657
			Background	79849.3	2226.07	1933	2544
191108_PAR6_22h_C-66	17:15:00	19:15:00	Worm	6152.98	3628.22	2171	6040	1951.13	1677.09
			Background	78093.2	1881.08	677	2193
			Background	107231	1969.32	1674	2317
			Background	107123	1947.47	1759	2236
			Background	164481	2006.65	1671	2345
191108_PAR6_22h_C-67	17:15:00	19:15:00	Worm	4853.62	5081.43	2049	9782	1995.51	3085.92
			Background	84342.7	1911.76	1665	2178
			Background	88019.8	2005.75	1700	2352
			Background	105921	2011.23	1762	2301
			Background	116546	2053.3	1730	2363
191108_PAR6_22h_C-68	17:15:00	19:15:00	Worm	5097.66	3938.91	2072	7482	1942.26	1996.65
			Background	94295.6	1855	1633	2128
			Background	200666	2000.44	1646	2343
			Background	91588.1	1935.38	1715	2178
			Background	104723	1978.23	1700	2306
191108_PAR6_22h_C-69	17:16:00	19:16:00	Worm	4673.89	4545.77	2193	9704	2043.86	2501.91
			Background	124741	1967.63	1726	2258
			Background	88725.5	2089.38	1772	2422
			Background	133294	2062.25	1822	2334
			Background	149994	2056.18	1717	3698
191108_PAR6_22h_C-70	17:16:00	19:16:00	Worm	5189.18	3993.88	2192	6882	2029.16	1964.72
			Background	178678	2014.64	1226	2427
			Background	65442.7	2054.49	1798	2328
			Background	82974.1	2005.34	1802	2230
			Background	80421.5	2042.16	1709	2402
191108_PAR6_22h_C-71	17:16:00	19:16:00	Worm	5168.56	4452.41	2218	9112	1979.93	2472.48
			Background	86519.3	1878.09	1650	2157
			Background	131248	2025.31	1703	2442
			Background	117156	1959.16	1739	2227
			Background	98226.6	2057.17	1753	2346
191108_PAR6_22h_C-72	17:16:00	19:16:00	Worm	5398.59	3760.39	2248	7169	1983.38	1777.02
			Background	59012.7	1935.72	1740	2165
			Background	104194	1950.18	1632	2307
			Background	124065	2050.16	1783	2357
			Background	88804.7	1997.45	1704	2311
191108_PAR6_22h_C-73	17:17:00	19:17:00	Worm	4388.62	4821.91	2215	11472	1859	2962.91
			Background	206818	1865.49	1586	2212
			Background	91855.2	1847.18	1549	2154
			Background	131222	1877.69	1640	2183
			Background	112750	1845.64	1539	2162
191108_PAR6_22h_C-74	17:17:00	19:17:00	Worm	4552.69	3152.3	1876	5846	1825.02	1327.28
			Background	108653	1855.97	1581	2217
			Background	111926	1767.92	1427	2152
			Background	134335	1844.65	1563	2149
			Background	113479	1831.55	1589	2107
191108_PAR6_22h_C-75	17:17:00	19:17:00	Worm	4017.61	5139.31	2070	13293	1833.05	3306.26
			Background	153152	1783.15	1540	2084
			Background	89002.5	1785.89	1507	2077
			Background	79313.4	1795.68	1566	2065
			Background	75349.4	1967.5	1573	2241
191108_PAR6_22h_C-76	17:15:00	19:15:00	Worm	5411.78	3831.88	1802	8135	1716.81	2115.06
			Background	148852	1648.19	1340	1954
			Background	110699	1769.54	1384	2085
			Background	137316	1703.59	1418	1980
			Background	97768.2	1745.93	1484	2018
191108_PAR6_22h_C-76-02	17:15:00	19:15:00	Worm	4725	3410.64	1960	5878	1716.81	1693.82
			Background	148852	1648.19	1340	1954
			Background	110699	1769.54	1384	2085
			Background	137316	1703.59	1418	1980
			Background	97768.2	1745.93	1484	2018

## Sheet: Auxin 22
File	Time	H development		Area	Mean Intensity	Min	Max	Average background	Corrected intenisty
191108_Par6_22h_A	09:23:00	11:23:00	Worm	1537.62	1367.21	1206	1547	1240.59	126.615						02:00:00
			Background	60693.7	1229	1078	1375
			Background	76838.4	1241.54	1064	1424
			Background	69129.7	1227.65	1096	1365								H development	Corrected intenisty	St dev
			Background	99034.6	1264.18	1065	1477								11:25:00	195.552	52.8032
191108_Par6_22h_A-02	09:24:00	11:24:00	Worm	1975.42	2248.63	2012	2476	1974.28	274.342						12:20:00	218.566	30.0159
			Background	76826	1936.63	1734	2197								13:35:00	200.834	41.1171
			Background	106801	1967.78	1622	2322								14:45:00	196.396	24.1831
			Background	111045	2011.15	1797	2281								15:35:00	187.006	41.7467
			Background	81794.3	1981.57	1717	2263								18:10:00	317.35	311.759
191108_Par6_22h_A-03	09:25:00	11:25:00	Worm	1749.51	1921.71	1719	2123	1716.81	204.902						19:18:00	482.881	611.636
			Background	79893	1660.37	1462	1912
			Background	120537	1666.37	1379	2000
			Background	155210	1768.21	1512	2061
			Background	166128	1772.27	1561	2008
191108_Par6_22h_A-04	09:25:00	11:25:00	Worm	2094.14	1922.33	1707	2159	1710.82	211.505
			Background	59618.6	1682.94	1508	1890
			Background	87601.8	1677.01	1415	1959
			Background	104839	1725.85	1481	1986
			Background	105119	1757.5	1559	1971
191108_Par6_22h_A-05	09:25:00	11:25:00	Worm	1486.51	1900.01	1734	2071	1648.56	251.448
			Background	79452.8	1623.9	1431	1866
			Background	99410.6	1615.26	1351	1893
			Background	116044	1672.89	1412	1930
			Background	123363	1682.2	1478	1903
191108_Par6_22h_A-06	09:26:00	11:26:00	Worm	1301.83	1795.36	1611	2027	1610.08	185.278
			Background	84768.1	1603.28	1404	1810
			Background	134299	1600.91	1311	1904
			Background	146425	1613.38	1342	1893
			Background	135700	1622.74	1420	1865
191108_Par6_22h_A-07	09:27:00	11:27:00	Worm	1921.83	1501.59	1310	1752	1375.77	125.814
			Background	78456	1385.78	1217	1580
			Background	147005	1386.43	1130	1681
			Background	100126	1329.35	1106	1585
			Background	111125	1401.53	1234	1602
191108_Par6_22h_A-08	09:27:00	11:27:00	Worm	1700.05	1495.11	1293	1767	1310.6	184.514
			Background	127801	1270.19	1091	1490
			Background	123031	1295.25	1087	1533
			Background	126650	1344.42	1114	1569
			Background	134661	1332.51	1149	1536
191108_Par6_22h_A-09	10:17:00	12:17:00	Worm	1794.03	1937.49	1746	3136	1719.05	218.448
			Background	87201.9	1681.43	1497	1921
			Background	106655	1696.06	1448	1976
			Background	148198	1754.68	1482	2076
			Background	125191	1744.01	1516	1964
191108_Par6_22h_A-10	10:18:00	12:18:00	Worm	1733.02	1707.32	1514	1928	1521.05	186.273
			Background	52627.2	1492.42	1337	1655
			Background	120880	1553.55	1326	1821
			Background	73459.7	1520.31	1285	1755
			Background	85797	1517.91	1339	1713
191108_Par6_22h_A-11	10:18:00	12:18:00	Worm	2218.63	1950.11	1736	2147	1773.08	177.027
			Background	123457	1752.03	1555	1991
			Background	104313	1732.01	1429	2075
			Background	125559	1824.97	1552	2088
			Background	80474.3	1783.32	1555	2023
191108_Par6_22h_A-12	10:18:00	12:18:00	Worm	1304.3	2006.42	1824	2206	1761.28	245.142
			Background	91357.2	1768.14	1580	1982
			Background	141082	1749.36	1453	2122
			Background	128517	1749.1	1488	2066
			Background	103605	1778.53	1563	2004
191108_Par6_22h_A-13	10:19:00	12:19:00	Worm	1535.98	1876.43	1653	2080	1663.6	212.832
			Background	126860	1633.58	1423	1863
			Background	115933	1662.28	1365	1953
			Background	96297.4	1673.13	1443	1927
			Background	94836.4	1685.42	1514	1907
191108_Par6_22h_A-14	10:19:00	12:19:00	Worm	1972.94	2225.38	1917	2467	1966.58	258.802
			Background	91670.5	1941.09	1721	2208
			Background	65561.4	1907.89	1646	2179
			Background	92406.8	1985.02	1722	2270
			Background	141645	2032.31	1792	2344
191108_Par6_22h_A-15	10:20:00	12:20:00	Worm	1747.86	1989.12	1778	2207	1742.68	246.437
			Background	136413	1704.88	1483	1999
			Background	123135	1707.35	1425	2037
			Background	103922	1772.45	1527	2034
			Background	83563.6	1786.03	1583	2019
191108_Par6_22h_A-16	10:20:00	12:20:00	Worm	1671.19	1544.51	1312	2335	1321.48	223.031
			Background	98204.4	1280.98	1115	1482
			Background	78438.7	1307.58	1119	1524
			Background	133850	1373.18	1154	1607
			Background	82982.3	1324.17	1144	1504
191108_Par6_22h_A-17	10:21:00	12:21:00	Worm	1465.9	1777.33	1504	2580	1578.35	198.982
			Background	112950	1591.6	1410	1826
			Background	95576.8	1556.01	1322	1816
			Background	139907	1580.98	1307	1902
			Background	103235	1584.82	1401	1792
191108_Par6_22h_A-18	11:33:00	13:33:00	Worm	1397.47	1900.77	1706	2090	1682.57	218.2
			Background	39143.1	1638.05	1477	1804
			Background	93863.6	1668.73	1412	1945
			Background	151048	1719.3	1446	2048
			Background	137582	1704.18	1495	1976
191108_Par6_22h_A-19	11:33:00	13:33:00	Worm	1531.85	1860.14	1653	2062	1628.3	231.846
			Background	94124.9	1620.66	887	1839
			Background	97352.7	1602.18	1351	1863
			Background	158530	1644.95	1383	1942
			Background	120800	1645.4	1457	1863
191108_Par6_22h_A-20	11:33:00	13:33:00	Worm	1693.45	1925.94	1735	2186	1756.17	169.769
			Background	53949.6	1741.25	1563	1953
			Background	106639	1719.82	1468	2035
			Background	141257	1764.62	1527	2075
			Background	104285	1798.99	1606	2021
191108_Par6_22h_A-21	11:33:00	13:33:00	Worm	1297.71	1817.64	1621	2062	1588.43	229.213
			Background	80995.3	1583.16	1402	1812
			Background	101590	1539.22	1264	1818
			Background	120147	1592.15	1346	1878
			Background	101924	1639.19	1461	1854
191108_Par6_22h_A-22	11:34:00	13:34:00	Worm	1554.94	1641.49	1325	1860	1480.79	160.699
			Background	104278	1455.95	1252	1669
			Background	138048	1476.98	1194	1775
			Background	130585	1495.65	1257	1761
			Background	78489	1494.57	1308	1677
191108_Par6_22h_A-23	11:34:00	13:34:00	Worm	1554.94	1917.55	1730	2102	1700	217.552
			Background	145464	1658.32	1412	1979
			Background	100255	1702.52	1429	2031
			Background	104159	1715.37	1515	1940
			Background	66027.2	1723.78	1483	1970
191108_Par6_22h_A-24	11:34:00	13:34:00	Worm	2353.84	1940.9	1693	2205	1794.13	146.771
			Background	137839	1756.96	1019	2073
			Background	151861	1755.36	1429	2214
			Background	95611.4	1813.23	1557	2074
			Background	131810	1850.97	1625	2101
191108_Par6_22h_A-25	11:35:00	13:35:00	Worm	1521.96	1995.06	1751	2175	1727.47	267.585
			Background	117795	1665.4	1453	1957
			Background	102732	1691.58	1405	1989
			Background	101310	1783.72	1522	2038
			Background	98546.5	1769.19	1574	1998
191108_Par6_22h_A-26	11:35:00	13:35:00	Worm	2408.26	2190.31	1919	2398	2024.44	165.87
			Background	176961	1980.2	1686	2305
			Background	60454.6	2010.98	1725	2276
			Background	65668.6	2052.81	1794	2347
			Background	112493	2053.78	1788	2332
191108_Par6_22h_A-27	12:41:00	14:41:00	Worm	1408.18	1975.48	1774	2205	1769.96	205.524
			Background	74847.3	1658.25	1460	1899
			Background	53588.5	1732.57	1512	1966
			Background	35498.1	1931.45	1750	2113
			Background	50292.3	1757.56	1576	1995
191108_Par6_22h_A-28	12:42:00	14:42:00	Worm	1586.27	1925.08	1707	2117	1715.73	209.345
			Background	132762	1707.11	1461	1993
			Background	56304.3	1701.33	1471	1951
			Background	100830	1755	1517	2015
			Background	96508.5	1699.5	1470	1945
191108_Par6_22h_A-29	12:42:00	14:42:00	Worm	2375.28	2056.75	1687	2369	1901.62	155.124
			Background	107378	1869.74	1463	2151
			Background	82077	1884.36	1587	2175
			Background	141191	1955.73	1668	2267
			Background	79735.6	1896.67	1691	2134
191108_Par6_22h_A-30	12:43:00	14:43:00	Worm	2064.46	1827.67	1609	2023	1647.19	180.48
			Background	96145.7	1617.36	1427	1845
			Background	103098	1628.32	1387	1903
			Background	124360	1677.87	1432	1992
			Background	88507.9	1665.2	1498	1872
191108_Par6_22h_A-31	12:43:00	14:43:00	Worm	2012.52	2146.15	1794	2404	1946.59	199.554
			Background	129342	1887.83	1671	2183
			Background	137044	1950.74	1622	2284
			Background	115042	1961.03	1726	2206
			Background	142091	1986.76	1675	2314
191108_Par6_22h_A-32	12:45:00	14:45:00	Worm	1535.15	1881.85	1603	2086	1641.31	240.545
			Background	90823	1594.36	1381	1824
			Background	127089	1602.75	1323	1910
			Background	140983	1678.82	1415	1982
			Background	155870	1689.3	1503	1922
191108_Par6_22h_A-33	12:46:00	14:46:00	Worm	1697.57	1668.75	1461	2121	1463.76	204.993
			Background	125305	1418.87	1195	1645
			Background	139948	1461.75	1216	1732
			Background	156081	1496.83	1238	1756
			Background	127330	1477.58	1299	1688
191108_Par6_22h_A-34	12:46:00	14:46:00	Worm	1240.82	1739.58	1525	1962	1564.11	175.471
			Background	90118	1499.27	1303	1743
			Background	149994	1548.47	1239	1864
			Background	156335	1607.86	1353	1890
			Background	135117	1600.82	1417	1829
191108_Par6_22h_A-35	12:46:00	14:46:00	Worm	1637.39	1570.6	1366	1806	1374.08	196.524
			Background	110429	1352.68	1173	1546
			Background	139203	1393.79	1144	1635
			Background	125681	1374.47	1148	1637
			Background	148631	1375.37	1188	1603
191108_Par6_22h_A-36	13:32:00	15:32:00	Worm	1524.43	1999.19	1803	2190	1761.92	237.262
			Background	213002	1782.08	1529	2098
			Background	160083	1729.73	1427	2066
			Background	90046.3	1738.99	1478	2006
			Background	85213.3	1796.9	1608	2010
191108_Par6_22h_A-37	13:32:00	15:32:00	Worm	1677.78	1782.07	1613	1974	1573.4	208.67
			Background	131373	1564.76	1376	1815
			Background	122001	1539.86	1245	1842
			Background	153977	1571.66	1314	1875
			Background	125147	1617.31	1431	1828
191108_Par6_22h_A-38	13:33:00	15:33:00	Worm	1584.62	1656.86	1389	1873	1467.94	188.912
			Background	113474	1430.19	1231	1634
			Background	180548	1453.02	1181	1745
			Background	82052.3	1481.18	1260	1705
			Background	133749	1507.38	1308	1743
191108_Par6_22h_A-39	13:34:00	15:34:00	Worm	1578.85	1955.24	1752	2172	1739.96	215.275
			Background	190728	1688.48	1465	2000
			Background	96640.4	1743.23	1482	2035
			Background	77146.7	1790.61	1556	2051
			Background	119527	1737.53	1516	1970
191108_Par6_22h_A-40	13:35:00	15:35:00	Worm	2850.17	2052.09	1729	2343	1899.53	152.552
			Background	126317	1843.8	1612	2128
			Background	105198	1938.39	1303	2242
			Background	144352	1956.01	1663	2261
			Background	82525.6	1859.93	1652	2050
191108_Par6_22h_A-41	13:35:00	15:35:00	Worm	2642.41	1983.76	1708	2212	1866.42	117.339
			Background	94491.8	1826.99	1598	2069
			Background	147022	1884.71	1570	2222
			Background	121147	1885.47	1597	2257
			Background	113656	1868.51	1625	2130
191108_Par6_22h_A-42	13:35:00	15:35:00	Worm	1663.77	1910.54	1684	2137	1691.91	218.632
			Background	129952	1659.6	1441	1898
			Background	108557	1685.61	1435	1974
			Background	108038	1705.12	1446	1974
			Background	161107	1717.32	1509	1986
191108_Par6_22h_A-43	13:36:00	15:36:00	Worm	2006.74	2184.41	1852	2463	1975.7	208.715
			Background	80151.1	1930.65	1708	2227
			Background	92547.7	1930.4	1618	2285
			Background	177926	2040.53	1715	2372
			Background	115161	2001.2	1787	2274
191108_Par6_22h_A-44	13:36:00	15:36:00	Worm	1688.5	1508.19	1298	1709	1372.49	135.698
			Background	76800.5	1309.75	1129	1490
			Background	70351.5	1395.48	1202	1596
			Background	134726	1425.32	1219	1647
			Background	94318.7	1359.41	1173	1561
191108_Par6_22h_A-45	16:10:00	18:10:00	Worm	3341.55	3022.65	1905	5341	1878.38	1144.27
			Background	87063.4	1837.65	1612	2086
			Background	76642.2	1869.91	1231	2162
			Background	86015.5	1917.59	1660	2185
			Background	68497.3	1888.38	1678	2121
191108_Par6_22h_A-46	16:11:00	18:11:00	Worm	3574.05	1923.82	1638	2153	1772.2	151.61
			Background	76099.7	1708.05	1506	1964
			Background	114533	1815.33	1528	2111
			Background	111085	1825.54	1560	2130
			Background	88040.4	1739.9	1532	1980
191108_Par6_22h_A-47	16:11:00	18:11:00	Worm	1349.65	1942.24	1690	2137	1740.15	202.087
			Background	122705	1712.05	1498	1968
			Background	180973	1764.17	1461	2084
			Background	140004	1763.66	1496	2064
			Background	97354.4	1720.74	1503	1949
191108_Par6_22h_A-48	16:11:00	18:11:00	Worm	1280.39	2039.2	1789	2293	1783.72	255.474
			Background	158935	1795.44	1569	2098
			Background	135381	1805.8	1521	2101
			Background	100082	1764.62	1505	2048
			Background	104654	1769.04	1569	2028
191108_Par6_22h_A-49	16:11:00	18:11:00	Worm	2225.23	2069.72	1813	2345	1853.33	216.39
			Background	126239	1847.71	1643	2097
			Background	128946	1857.48	1544	2193
			Background	83871.1	1846	1591	2142
			Background	85163	1862.14	1664	2087
191108_Par6_22h_A-50	16:12:00	18:12:00	Worm	1744.57	2004.54	1756	2241	1749.77	254.765
			Background	100380	1726.22	1535	1950
			Background	100303	1684.84	1414	1979
			Background	144002	1779.49	1479	2099
			Background	95294.9	1808.54	1622	2050
191108_Par6_22h_A-51	16:13:00	18:13:00	Worm	1468.37	1747.06	1599	1920	1530.27	216.795
			Background	175446	1510.7	1309	1784
			Background	166702	1547.13	1263	1827
			Background	159986	1541.74	1272	1833
			Background	113684	1521.51	1336	1739
191108_Par6_22h_A-52	16:13:00	18:13:00	Worm	1374.38	1838.48	1613	2087	1611.59	226.887
			Background	111659	1606.51	1420	1843
			Background	89863.3	1609.72	1337	1865
			Background	110049	1619.58	1363	1894
			Background	101226	1610.56	1420	1844
191108_Par6_22h_A-53	16:14:00	18:14:00	Worm	1515.37	1573.06	1338	1749	1385.19	187.87
			Background	114650	1349.09	1161	1572
			Background	132508	1375.23	1119	1654
			Background	126624	1419.52	1198	1671
			Background	81896.5	1396.93	1209	1569
191108_Par6_22h_A-54	17:17:00	19:17:00	Worm	2626.74	2656.36	1788	3826	1771.74	884.625
			Background	82809.2	1721.75	1541	1936
			Background	148502	1753.89	1409	2053
			Background	122779	1806.1	1549	2076
			Background	118960	1805.21	1606	2042
191108_Par6_22h_A-55	17:18:00	19:18:00	Worm	1718.18	1940.66	1751	2165	1733.97	206.69
			Background	111615	1703.96	1491	1973
			Background	132336	1711.85	1417	2040
			Background	155501	1755.68	1369	2080
			Background	95159.6	1764.38	1574	1977
191108_Par6_22h_A-56	17:18:00	19:18:00	Worm	1748.69	1930.94	1730	2148	1795.16	135.783
			Background	156424	1753.16	1489	2054
			Background	103528	1822.42	1541	2118
			Background	96396.3	1819.4	1543	2103
			Background	63027	1785.65	1607	1976
191108_Par6_22h_A-57	17:18:00	19:18:00	Worm	1219.38	2013.62	1819	2231	1766.22	247.41
			Background	118361	1723.66	1498	2004
			Background	141560	1717.66	1405	2055
			Background	129942	1790.03	1514	2098
			Background	140103	1833.51	1616	2099
191108_Par6_22h_A-58	17:18:00	19:18:00	Worm	1362.84	1724.66	1524	1952	1607.69	116.976
			Background	124337	1561.99	1358	1824
			Background	147167	1603.98	1319	1913
			Background	115268	1622.2	1372	1925
			Background	85811.9	1642.57	1461	1882
191108_Par6_22h_A-59	17:18:00	19:18:00	Worm	1638.21	1733.16	1511	3349	1511.76	221.399
			Background	154287	1480.76	1270	1762
			Background	105775	1479.35	1237	1780
			Background	109429	1538.89	1315	1779
			Background	114449	1548.06	1334	1781
191108_Par6_22h_A-60	17:19:00	19:19:00	Worm	1618.42	1973.09	1734	2177	1789.09	183.995
			Background	87261.3	1702.43	1497	1955
			Background	119020	1803.94	1535	2113
			Background	178876	1879.38	1583	2176
			Background	108706	1770.61	1554	2031
191108_Par6_22h_A-61	17:19:00	19:19:00	Worm	2818.84	3734.3	1994	7363	1868.12	1866.17
			Background	89454.3	1818.5	1620	2058
			Background	125074	1871.06	1579	2196
			Background	141983	1903.49	1603	2221
			Background	77367.7	1879.44	1669	2096

## Sheet: All data
CONTROL			AUXIN
Sample name	Time (h)	Normalised intensity	Sample name	Time (h)	Normalised intensity
191108_PAR6_22h_C	11:20:00	2186.8	191108_Par6_22h_A	11:23:00	126.615
191108_PAR6_22h_C-01	11:19:00	2976.34	191108_Par6_22h_A-02	11:24:00	274.342
191108_PAR6_22h_C-02	11:20:00	3138.85	191108_Par6_22h_A-03	11:25:00	204.902
191108_PAR6_22h_C-03	11:21:00	973.783	191108_Par6_22h_A-04	11:25:00	211.505
191108_PAR6_22h_C-04	11:21:00	1425.52	191108_Par6_22h_A-05	11:25:00	251.448
191108_PAR6_22h_C-05	11:21:00	1492.89	191108_Par6_22h_A-06	11:26:00	185.278
191108_PAR6_22h_C-06	11:21:00	3472.07	191108_Par6_22h_A-07	11:27:00	125.814
191108_PAR6_22h_C-07	11:22:00	485.594	191108_Par6_22h_A-08	11:27:00	184.514
191108_PAR6_22h_C-08	11:22:00	1414.94	191108_Par6_22h_A-09	12:17:00	218.448
191108_PAR6_22h_C-08-02	11:22:00	305.395	191108_Par6_22h_A-10	12:18:00	186.273
191108_PAR6_22h_C-09	11:22:00	1122.48	191108_Par6_22h_A-11	12:18:00	177.027
191108_PAR6_22h_C-10	12:14:00	311.671	191108_Par6_22h_A-12	12:18:00	245.142
191108_PAR6_22h_C-11	12:14:00	2973.51	191108_Par6_22h_A-13	12:19:00	212.832
191108_PAR6_22h_C-12	12:15:00	1480.63	191108_Par6_22h_A-14	12:19:00	258.802
191108_PAR6_22h_C-13	12:15:00	3740.88	191108_Par6_22h_A-15	12:20:00	246.437
191108_PAR6_22h_C-14	12:15:00	4604.03	191108_Par6_22h_A-16	12:20:00	223.031
191108_PAR6_22h_C-15	12:15:00	2149.91	191108_Par6_22h_A-17	12:21:00	198.982
191108_PAR6_22h_C-16	12:15:00	4215.49	191108_Par6_22h_A-18	13:33:00	218.2
191108_PAR6_22h_C-17	12:16:00	4003.02	191108_Par6_22h_A-19	13:33:00	231.846
191108_PAR6_22h_C-18	12:16:00	3470.83	191108_Par6_22h_A-20	13:33:00	169.769
191108_PAR6_22h_C-19	12:16:00	3963.39	191108_Par6_22h_A-21	13:33:00	229.213
191108_PAR6_22h_C-20	13:29:00	4510.94	191108_Par6_22h_A-22	13:34:00	160.699
191108_PAR6_22h_C-21	13:29:00	4351.44	191108_Par6_22h_A-23	13:34:00	217.552
191108_PAR6_22h_C-22	13:29:00	4173.73	191108_Par6_22h_A-24	13:34:00	146.771
191108_PAR6_22h_C-23	13:30:00	3944.86	191108_Par6_22h_A-25	13:35:00	267.585
191108_PAR6_22h_C-24	13:30:00	3420.98	191108_Par6_22h_A-26	13:35:00	165.87
191108_PAR6_22h_C-25	13:30:00	5774.21	191108_Par6_22h_A-27	14:41:00	205.524
191108_PAR6_22h_C-26	13:30:00	4733.1	191108_Par6_22h_A-28	14:42:00	209.345
191108_PAR6_22h_C-27	13:31:00	4700.52	191108_Par6_22h_A-29	14:42:00	155.124
191108_PAR6_22h_C-28	13:31:00	5350.53	191108_Par6_22h_A-30	14:43:00	180.48
191108_PAR6_22h_C-29	13:32:00	4916.02	191108_Par6_22h_A-31	14:43:00	199.554
191108_PAR6_22h_C-30	14:35:00	3695.58	191108_Par6_22h_A-32	14:45:00	240.545
191108_PAR6_22h_C-31	14:36:00	5163.92	191108_Par6_22h_A-33	14:46:00	204.993
191108_PAR6_22h_C-32	14:36:00	5745.68	191108_Par6_22h_A-34	14:46:00	175.471
191108_PAR6_22h_C-33	14:37:00	4701.24	191108_Par6_22h_A-35	14:46:00	196.524
191108_PAR6_22h_C-34	14:37:00	3442.45	191108_Par6_22h_A-36	15:32:00	237.262
191108_PAR6_22h_C-35	14:37:00	4963.55	191108_Par6_22h_A-37	15:32:00	208.67
191108_PAR6_22h_C-36	14:37:00	4471.75	191108_Par6_22h_A-38	15:33:00	188.912
191108_PAR6_22h_C-37	14:39:00	5744.14	191108_Par6_22h_A-39	15:34:00	215.275
191108_PAR6_22h_C-38	14:40:00	5577.9	191108_Par6_22h_A-40	15:35:00	152.552
191108_PAR6_22h_C-39	14:40:00	5714.94	191108_Par6_22h_A-41	15:35:00	117.339
191108_PAR6_22h_C-40	14:40:00	4945.02	191108_Par6_22h_A-42	15:35:00	218.632
191108_PAR6_22h_C-41	14:40:00	5539.85	191108_Par6_22h_A-43	15:36:00	208.715
191108_PAR6_22h_C-42	14:40:00	5718.42	191108_Par6_22h_A-44	15:36:00	135.698
191108_PAR6_22h_C-43	15:27:00	4017.6	191108_Par6_22h_A-45	18:10:00	1144.27
191108_PAR6_22h_C-44	15:28:00	4798.48	191108_Par6_22h_A-46	18:11:00	151.61
191108_PAR6_22h_C-45	15:28:00	2370.02	191108_Par6_22h_A-47	18:11:00	202.087
191108_PAR6_22h_C-46	15:29:00	5450.96	191108_Par6_22h_A-48	18:11:00	255.474
191108_PAR6_22h_C-47	15:29:00	5757.99	191108_Par6_22h_A-49	18:11:00	216.39
191108_PAR6_22h_C-48	15:29:00	3632.54	191108_Par6_22h_A-50	18:12:00	254.765
191108_PAR6_22h_C-49	15:29:00	5113.43	191108_Par6_22h_A-51	18:13:00	216.795
191108_PAR6_22h_C-50	15:30:00	5902.74	191108_Par6_22h_A-52	18:13:00	226.887
191108_PAR6_22h_C-51	15:30:00	4555.79	191108_Par6_22h_A-53	18:14:00	187.87
191108_PAR6_22h_C-52	15:30:00	5752.65	191108_Par6_22h_A-54	19:17:00	884.625
191108_PAR6_22h_C-53	15:31:00	4393.1	191108_Par6_22h_A-55	19:18:00	206.69
191108_PAR6_22h_C-54	18:03:00	2838.79	191108_Par6_22h_A-56	19:18:00	135.783
191108_PAR6_22h_C-55	18:06:00	1286.21	191108_Par6_22h_A-57	19:18:00	247.41
191108_PAR6_22h_C-56	18:06:00	2257.7	191108_Par6_22h_A-58	19:18:00	116.976
191108_PAR6_22h_C-57	18:07:00	3162.5	191108_Par6_22h_A-59	19:18:00	221.399
191108_PAR6_22h_C-58	18:07:00	2876.8	191108_Par6_22h_A-60	19:19:00	183.995
191108_PAR6_22h_C-59	18:07:00	2806.9	191108_Par6_22h_A-61	19:19:00	1866.17
191108_PAR6_22h_C-60	18:07:00	5143.92	191108_PAR6_9h_A	1 day, 1:07:00	139.488
191108_PAR6_22h_C-61	18:08:00	2862.02	191108_PAR6_9h_A-02	1 day, 1:07:00	225.833
191108_PAR6_22h_C-62	18:08:00	3541.92	191108_PAR6_9h_A-03	1 day, 1:08:00	2448.44
191108_PAR6_22h_C-63	18:08:00	3230.21	191108_PAR6_9h_A-04	1 day, 1:08:00	1545.88
191108_PAR6_22h_C-64	18:09:00	2477.14	191108_PAR6_9h_A-05	1 day, 1:09:00	260.944
191108_PAR6_22h_C-65	18:09:00	2294.65	191108_PAR6_9h_A-06	1 day, 1:10:00	187.288
191108_PAR6_22h_C-66	19:15:00	1677.09	191108_PAR6_9h_A-07	1 day, 1:11:00	193.46
191108_PAR6_22h_C-67	19:15:00	3085.92	191108_PAR6_9h_A-08	1 day, 1:45:00	2729.7
191108_PAR6_22h_C-68	19:15:00	1996.65	191108_PAR6_9h_A-09	1 day, 1:46:00	908.811
191108_PAR6_22h_C-69	19:16:00	2501.91	191108_PAR6_9h_A-10	1 day, 1:46:00	103.842
191108_PAR6_22h_C-70	19:16:00	1964.72	191108_PAR6_9h_A-11	1 day, 1:46:00	106.061
191108_PAR6_22h_C-71	19:16:00	2472.48	191108_PAR6_9h_A-12	1 day, 1:47:00	118.272
191108_PAR6_22h_C-72	19:16:00	1777.02	191108_PAR6_9h_A-13	1 day, 1:47:00	192.929
191108_PAR6_22h_C-73	19:17:00	2962.91	191108_PAR6_9h_A-14	1 day, 1:47:00	87.8712
191108_PAR6_22h_C-74	19:17:00	1327.28	191108_PAR6_9h_A-15	1 day, 1:49:00	-8.08175
191108_PAR6_22h_C-75	19:17:00	3306.26	191108_PAR6_9h_A-16	1 day, 1:55:00	226.029
191108_PAR6_22h_C-76	19:15:00	2115.06	191108_PAR6_9h_A-17	1 day, 1:55:00	2130.07
191108_PAR6_22h_C-76-02	19:15:00	1693.82	191108_PAR6_9h_A-18	1 day, 1:56:00	139.615
191108_PAR6_9h_C	1 day, 1:03:00	7093.66	191108_PAR6_9h_A-19	1 day, 1:56:00	155.632
191108_PAR6_9h_C-02	1 day, 1:03:00	7020.56	191108_PAR6_9h_A-20	1 day, 1:56:00	73.8932
191108_PAR6_9h_C-03	1 day, 1:04:00	6293.56	191108_PAR6_9h_A-21	1 day, 1:57:00	205.72
191108_PAR6_9h_C-04	1 day, 1:43:00	7355.36	191108_PAR6_9h_A-22	1 day, 1:57:00	190.94
191108_PAR6_9h_C-05	1 day, 1:44:00	7541.71	191108_PAR6_9h_A-23	1 day, 4:08:00	177.928
191108_PAR6_9h_C-06	1 day, 1:44:00	7482.21	191108_PAR6_9h_A-24	1 day, 4:08:00	121.529
191108_PAR6_9h_C-07	1 day, 2:53:00	7337.55	191108_PAR6_9h_A-25	1 day, 4:08:00	818.307
191108_PAR6_9h_C-08	1 day, 2:53:00	4613.63	191108_PAR6_9h_A-26	1 day, 4:09:00	157.413
191108_PAR6_9h_C-09	1 day, 2:54:00	8264.95	191108_PAR6_9h_A-27	1 day, 4:09:00	225.632
191108_PAR6_9h_C-10	1 day, 4:04:00	8374.22	191108_PAR6_9h_A-28	1 day, 4:10:00	228.084
191108_PAR6_9h_C-11	1 day, 4:53:00	3318.38	191108_PAR6_9h_A-29	1 day, 4:10:00	250.19
191108_PAR6_9h_C-12	1 day, 4:05:00	4143.45	191108_PAR6_9h_A-30	1 day, 4:11:00	204.539
191108_PAR6_9h_C-13	1 day, 4:06:00	5431.78	191108_PAR6_9h_A-31	1 day, 4:12:00	163.172
191108_PAR6_9h_C-14	1 day, 4:54:00	4495.03	191108_PAR6_9h_A-32	1 day, 4:55:00	167.906
191108_PAR6_9h_C-15	1 day, 4:54:00	6357.17	191108_PAR6_9h_A-33	1 day, 4:55:00	97.8697
191108_PAR6_9h_C-16	1 day, 7:34:00	3961.72	191108_PAR6_9h_A-34	1 day, 4:55:00	187.343
191108_PAR6_9h_C-17	1 day, 7:35:00	1766.33	191108_PAR6_9h_A-35	1 day, 4:56:00	188.694
191108_PAR6_9h_C-18	1 day, 7:35:00	1624.23	191108_PAR6_9h_A-35-02	1 day, 4:56:00	198.055
191108_PAR6_9h_C-19	1 day, 8:35:00	2282.49	191108_PAR6_9h_A-36	1 day, 4:56:00	267.177
191108_PAR6_9h_C-20	1 day, 8:35:00	3608.68	191108_PAR6_9h_A-37	1 day, 4:56:00	198.474
191108_PAR6_9h_C-21	1 day, 8:36:00	2721.52	191108_PAR6_9h_A-38	1 day, 4:57:00	268.408
191108_PAR6_20h_C-12	15:37:00	3424.57	191108_PAR6_9h_A-39	1 day, 7:36:00	154.636
191108_PAR6_20h_C-13	14:29:00	2423.63	191108_PAR6_9h_A-40	1 day, 7:38:00	219.945
191108_PAR6_20h_C-14	15:37:00	4657.39	191108_PAR6_9h_A-41	1 day, 7:38:00	174.413
191108_PAR6_20h_C-15	15:37:00	2252.92	191108_PAR6_9h_A-42	1 day, 7:39:00	122.111
191108_PAR6_20h_C-16	15:38:00	4405.35	191108_PAR6_9h_A-43	1 day, 7:39:00	178.077
191108_PAR6_20h_C-17	16:36:00	5442.71	191108_PAR6_9h_A-44	1 day, 7:40:00	249.272
191108_PAR6_20h_C-18	16:48:00	1929.87	191108_PAR6_9h_A-45	1 day, 7:40:00	265.612
191108_PAR6_20h_C-19	16:48:00	5080.91	191108_PAR6_9h_A-46	1 day, 7:40:00	178.626
191108_PAR6_20h_C-20	16:49:00	5500.05	191108_PAR6_9h_A-47	1 day, 8:36:00	57.2383
191108_PAR6_20h_C-21	16:49:00	2768.84	191108_PAR6_9h_A-48	1 day, 8:37:00	137.101
191108_PAR6_20h_C-22	16:49:00	3227.48	191108_PAR6_9h_A-49	1 day, 8:37:00	75.0213
191108_PAR6_20h_C-23	16:50:00	5329.15	191108_PAR6_9h_A-50	1 day, 8:37:00	88.0395
191108_PAR6_20h_C-24	16:50:00	5487.66	191108_PAR6_9h_A-51	1 day, 8:37:00	179.527
191108_PAR6_20h_C-25	17:38:00	5869.32	191108_PAR6_9h_A-52	1 day, 8:38:00	255.645
191108_PAR6_20h_C-26	17:38:00	5752.66	191108_PAR6_9h_A-53	1 day, 8:38:00	216.312
191108_PAR6_20h_C-27	17:39:00	1464.11	191108_PAR6_20h_A-21	16:51:00	279.627
191108_PAR6_20h_C-28	17:39:00	2663.69	191108_PAR6_20h_A-22	16:52:00	300.592
191108_PAR6_20h_C-29	17:40:00	3754	191108_PAR6_20h_A-23	16:53:00	192.123
191108_PAR6_20h_C-30	20:17:00	2468.27	191108_PAR6_20h_A-24	16:53:00	229.869
191108_PAR6_20h_C-31	20:18:00	2902.41	191108_PAR6_20h_A-25	16:53:00	103.49
191108_PAR6_20h_C-32	20:18:00	1436.03	191108_PAR6_20h_A-26	16:53:00	144.995
191108_PAR6_20h_C-33	20:19:00	2944.23	191108_PAR6_20h_A-27	16:53:00	117.057
191108_PAR6_20h_C-34	20:19:00	1425.53	191108_PAR6_20h_A-28	16:53:00	142.924
191108_PAR6_20h_C-35	21:14:00	3292.27	191108_PAR6_20h_A-29	16:54:00	226.666
191108_PAR6_20h_C-36	21:21:00	4733.39	191108_PAR6_20h_A-30	16:55:00	124.653
191108_PAR6_20h_C-37	21:21:00	1538.77	191108_PAR6_20h_A-31	17:43:00	125.624
191108_PAR6_20h_C-38	21:21:00	2920.72	191108_PAR6_20h_A-32	17:43:00	553.311
191108_PAR6_20h_C-39	21:22:00	2443.2	191108_PAR6_20h_A-33	17:44:00	500.93
191108_PAR6_20h_C-40	21:22:00	2285.51	191108_PAR6_20h_A-34	17:44:00	180.084
191108_PAR6_20h_C-41	21:22:00	1189.03	191108_PAR6_20h_A-35	17:44:00	166.877
191108_PAR6_20h_C-42	21:23:00	4867.22	191108_PAR6_20h_A-36	17:44:00	187.622
191108_PAR6_20h_C-43	21:23:00	2181.17	191108_PAR6_20h_A-37	17:44:00	224.63
191108_PAR6_13h_C-14	23:36:00	5254.31	191108_PAR6_20h_A-38	17:46:00	224.136
191108_PAR6_13h_C-15	22:45:00	3554.96	191108_PAR6_20h_A-39	20:21:00	2622.75
191108_PAR6_13h_C-16	22:45:00	2508.62	191108_PAR6_20h_A-40	20:22:00	83.3977
191108_PAR6_13h_C-17	22:45:00	3048.04	191108_PAR6_20h_A-41	20:22:00	214.728
191108_PAR6_13h_C-18	22:46:00	1012.54	191108_PAR6_20h_A-42	20:23:00	210.053
191108_PAR6_13h_C-19	22:47:00	2601.87	191108_PAR6_20h_A-43	20:23:00	193.674
191108_PAR6_13h_C-20	22:47:00	3241.1	191108_PAR6_20h_A-44	20:23:00	161.334
191108_PAR6_13h_C-21	23:56:00	5113.04	191108_PAR6_20h_A-45	20:23:00	234.095
191108_PAR6_13h_C-22	23:56:00	3972.8	191108_PAR6_20h_A-46	20:24:00	1289.52
191108_PAR6_13h_C-23	23:57:00	5810.55	191108_PAR6_20h_A-47	20:24:00	1126.26
191108_PAR6_13h_C-24	23:57:00	4972.09	191108_PAR6_20h_A-48	21:24:00	171.98
191108_PAR6_13h_C-25	23:57:00	5017.4	191108_PAR6_20h_A-49	21:24:00	201.784
191108_PAR6_13h_C-26	1 day, 0:57:00	2857.98	191108_PAR6_20h_A-50	21:25:00	171.108
191108_PAR6_13h_C-27	1 day, 0:47:00	5910.83	191108_PAR6_20h_A-51	21:25:00	529.769
191108_PAR6_13h_C-28	1 day, 0:47:00	6489.49	191108_PAR6_20h_A-52	21:26:00	590.397
191108_PAR6_13h_C-29	1 day, 0:57:00	6244.86	191108_PAR6_20h_A-53	21:27:00	3002.55
191108_PAR6_13h_C-30	1 day, 0:49:00	4324.55	191108_PAR6_13h_A-16	22:48:00	435.847
191108_PAR6_13h_C-31	1 day, 0:49:00	5868.08	191108_PAR6_13h_A-17	22:49:00	123.474
191108_PAR6_13h_C-32	1 day, 4:14:00	5314.29	191108_PAR6_13h_A-18	22:49:00	1113.91
191108_PAR6_13h_C-33	1 day, 0:49:00	5615.78	191108_PAR6_13h_A-19	22:49:00	272.402
191108_PAR6_13h_C-34	1 day, 4:14:00	5099.36	191108_PAR6_13h_A-20	22:50:00	260.187
191108_PAR6_13h_C-35	1 day, 3:28:00	3177.27	191108_PAR6_13h_A-21	22:50:00	644.67
191108_PAR6_13h_C-36	1 day, 3:28:00	6739.92	191108_PAR6_13h_A-22	22:51:00	2399.73
191108_PAR6_13h_C-37	1 day, 3:28:00	3304.1	191108_PAR6_13h_A-23	22:52:00	231.302
191108_PAR6_13h_C-38	1 day, 3:28:00	5254.18	191108_PAR6_13h_A-24	1 day, 0:57:00	176.824
191108_PAR6_13h_C-39	1 day, 4:29:00	4248.58	191108_PAR6_13h_A-25	1 day, 0:00:00	121.446
191108_PAR6_13h_C-40	1 day, 4:29:00	4611.08	191108_PAR6_13h_A-26	1 day, 0:00:00	1514.24
191108_PAR6_13h_C-41	1 day, 4:29:00	3263.34	191108_PAR6_13h_A-27	1 day, 0:01:00	259.019
191108_PAR6_13h_C-42	1 day, 4:30:00	3778.55	191108_PAR6_13h_A-28	1 day, 0:02:00	1836.79
191108_PAR6_13h_C-43	1 day, 4:30:00	2092.54	191108_PAR6_13h_A-29	1 day, 0:02:00	212.675
191108_PAR6_13h_C-44	1 day, 4:31:00	2556.47	191108_PAR6_13h_A-30	1 day, 0:02:00	218.591
			191108_PAR6_13h_A-31	1 day, 0:02:00	144.343
			191108_PAR6_13h_A-32	1 day, 0:51:00	1318.65
			191108_PAR6_13h_A-33	1 day, 0:51:00	94.571
			191108_PAR6_13h_A-34	1 day, 0:51:00	149.743
			191108_PAR6_13h_A-35	1 day, 0:52:00	275.157
			191108_PAR6_13h_A-36	1 day, 0:52:00	1175.44
			191108_PAR6_13h_A-37	1 day, 0:52:00	237.342
			191108_PAR6_13h_A-38	1 day, 0:52:00	198.01
			191108_PAR6_13h_A-39	1 day, 0:52:00	205.679

## Sheet: Grouped data
CONTROL			AUXIN
H development	Corrected intenisty	St dev	H development	Corrected intenisty	St dev
11:20:00	1726.79	1074.65	11:25:00	195.552	52.8032
12:15:00	3091.34	1371.56	12:20:00	218.566	30.0159
13:30:00	4587.63	678.146	13:35:00	200.834	41.1171
14:35:00	5032.65	778.653	14:45:00	196.396	24.1831
15:30:00	4704.12	1075.52	15:35:00	187.006	41.7467
16:48:00	4345.83	1459.98	16:52:00	186.2	70.2172
17:38:00	3900.75	1923.14	17:44:00	270.402	162.175
18:05:00	2898.23	914.612	18:10:00	317.35	311.759
19:15:00	2240.09	626.02	19:18:00	482.881	611.636
20:18:00	2235.29	757.704	20:22:00	681.757	854.587
21:20:00	2827.92	1285.6	21:24:00	777.932	1105.72
22:45:00	2661.19	897.732	22:50:00	685.191	761.562
23:55:00	5023.36	597.897	1 day, 0:00:00	615.301	731.693
1 day, 0:58:00	5282.63	1408.31	1 day, 0:50:00	425.714	469.789
1 day, 1:03:00	6802.59	442.347	1 day, 1:10:00	714.476	914.907
1 day, 1:43:00	7459.76	95.1857	1 day, 1:50:00	529.925	934.395
1 day, 2:53:00	6738.71	1897.89	1 day, 2:55:00	445.985	744.302
1 day, 4:30:00	3870.53	1168.08	1 day, 4:10:00	260.755	212.98
1 day, 4:54:00	2284.9	37.1708	1 day, 4:55:00	196.741	54.5922
1 day, 7:34:00	2450.76	1310.46	1 day, 7:40:00	192.836	48.4569
1 day, 8:35:00	2870.9	675.599	1 day, 8:38:00	144.126	75.7414
1 day, 3:45:00	5203.56	1884.4
