# Supplementary material for: Epidermal PAR-6 and PKC-3 are essential for larval development of C. elegans and organize non-centrosomal microtubules
Source: eLife journal article supplement (doi:10.7554/elife.62067), 2020-12-10
Supplement: fig3-figsupp1-data1 [file 201124_P6aid_pwrt2_canal_length L2.xlsx]

## Sheet: Auxin
201124_P6aid_pwrt2_1-3
	um	%
Head	64
Canal anterior	41	0.640625	64.0625	-64.0625
Rest of body	154
Canal posterior	124	0.805195	80.5195
Total body	218
Total canal	165	0.756881	75.6881
201124_P6aid_pwrt2_4-6
	um	%
Head	64
Canal anterior	41	0.640625	64.0625	-64.0625
Rest of body	172
Canal posterior	140	0.813953	81.3953
Total body	236
Total canal	181	0.766949	76.6949
201124_P6aid_pwrt2_7-9
	um	%
Head	81
Canal anterior	53	0.654321	65.4321	-65.4321
Rest of body	146
Canal posterior	115	0.787671	78.7671
Total body	227
Total canal	168	0.740088	74.0088
201124_P6aid_pwrt2_10-11
	um	%
Head	60
Canal anterior	35	0.583333	58.3333	-58.3333
Rest of body	144
Canal posterior	121	0.840278	84.0278
Total body	204
Total canal	156	0.764706	76.4706
201124_P6aid_pwrt2_12-14
	um	%
Head	65
Canal anterior	40	0.615385	61.5385	-61.5385
Rest of body	178
Canal posterior	154	0.865169	86.5169
Total body	243
Total canal	194	0.798354	79.8354
201124_P6aid_pwrt2_15-16
	um	%
Head	52
Canal anterior	32	0.615385	61.5385	-61.5385
Rest of body	125
Canal posterior	82	0.656	65.6
Total body	177
Total canal	114	0.644068	64.4068
201124_P6aid_pwrt2_17-18
	um	%
Head	65
Canal anterior	43	0.661538	66.1538	-66.1538
Rest of body	144
Canal posterior	116	0.805556	80.5556
Total body	209
Total canal	159	0.760766	76.0766
201124_P6aid_pwrt2_19-21
	um	%
Head	65
Canal anterior	37	0.569231	56.9231	-56.9231
Rest of body	154
Canal posterior	132	0.857143	85.7143
Total body	219
Total canal	169	0.771689	77.1689
201116_P6aid_pwrt2_A_8-10
	um	%
Head	81
Canal anterior	52	0.641975	64.1975	-64.1975
Rest of body	229
Canal posterior	214	0.934498	93.4498
Total body	310
Total canal	266	0.858065	85.8065
201116_P6aid_pwrt2_A_1-2
	um	%
Head	60
Canal anterior	33	0.55	55	-55
Rest of body	123
Canal posterior	86	0.699187	69.9187
Total body	183
Total canal	119	0.650273	65.0273

## Sheet: Control
201124_P6aid_pwrt2_C_1-2
	um	%
Head	84
Canal anterior	51	0.607143
Rest of body	199
Canal posterior	175	0.879397
Total body	283
Total canal	226	0.798587
201124_P6aid_pwrt2_C_3-4
	um	%
Head	85
Canal anterior	55	0.647059
Rest of body	212
Canal posterior	188	0.886792
Total body	297
Total canal	243	0.818182
201124_P6aid_pwrt2_C_5-7
	um	%
Head	81
Canal anterior	48	0.592593
Rest of body	200
Canal posterior	178	0.89
Total body	281
Total canal	226	0.80427
201124_P6aid_pwrt2_C_9-11
	um	%
Head	86
Canal anterior	51	0.593023
Rest of body	213
Canal posterior	186	0.873239
Total body	299
Total canal	237	0.792642
201124_P6aid_pwrt2_C_12-14
	um	%
Head	73
Canal anterior	42	0.575342
Rest of body	182
Canal posterior	161	0.884615
Total body	255
Total canal	203	0.796078
201124_P6aid_pwrt2_C_12-14
	um	%
Head	78
Canal anterior	46	0.589744
Rest of body	188
Canal posterior	181	0.962766
Total body	266
Total canal	227	0.853383
201116_P6aid_pwrt2_C_1-4
	um	%
Head	91
Canal anterior	52	0.571429
Rest of body	201
Canal posterior	178	0.885572
Total body	292
Total canal	230	0.787671
201116_P6aid_pwrt2_C_5-8
	um	%
Head	69
Canal anterior	43	0.623188
Rest of body	169
Canal posterior	141	0.83432
Total body	238
Total canal	184	0.773109
201116_P6aid_pwrt2_C_9-12
	um	%
Head	93
Canal anterior	60	0.645161
Rest of body	215
Canal posterior	178	0.827907
Total body	308
Total canal	238	0.772727
201116_P6aid_pwrt2_C_13-16
	um	%
Head	88
Canal anterior	60	0.681818
Rest of body	196
Canal posterior	168	0.857143
Total body	284
Total canal	228	0.802817
