# Supplementary material for: Epidermal PAR-6 and PKC-3 are essential for larval development of C. elegans and organize non-centrosomal microtubules
Source: eLife journal article supplement (doi:10.7554/elife.62067), 2020-12-10
Supplement: fig3-figsupp1-data1 [file 201130_P6aid_pwrt2_canal_length L1.xlsx]

## Sheet: Auxin
201130_P6aid_pwrt2_A_1
	um	%
Head	72
Canal anterior	31	0.430556	43.0556	-43.0556
Rest of body	139
Canal posterior	84	0.604317	60.4317
Total body	211
Total canal	115	0.545024	54.5024
201130_P6aid_pwrt2_A_2
	um	%
Head	74
Canal anterior	37	0.5	50	-50
Rest of body	149
Canal posterior	88	0.590604	59.0604
Total body	223
Total canal	125	0.560538	56.0538
201130_P6aid_pwrt2_A_3-4
	um	%
Head	70
Canal anterior	34	0.485714	48.5714	-48.5714
Rest of body	144
Canal posterior	86	0.597222	59.7222
Total body	214
Total canal	120	0.560748	56.0748
201130_P6aid_pwrt2_A_5-6
	um	%
Head	75
Canal anterior	32	0.426667	42.6667	-42.6667
Rest of body	140
Canal posterior	96	0.685714	68.5714
Total body	215
Total canal	128	0.595349	59.5349
201130_P6aid_pwrt2_A_7-8
	um	%
Head	75
Canal anterior	33	0.44	44	-44
Rest of body	133
Canal posterior	77	0.578947	57.8947
Total body	208
Total canal	110	0.528846	52.8846
201130_P6aid_pwrt2_A_7-8
	um	%
Head	70
Canal anterior	30	0.428571	42.8571	-42.8571
Rest of body	127
Canal posterior	72	0.566929	56.6929
Total body	197
Total canal	102	0.517766	51.7766
201130_P6aid_pwrt2_A_9-10
	um	%
Head	68
Canal anterior	31	0.455882	45.5882	-45.5882
Rest of body	137
Canal posterior	75	0.547445	54.7445
Total body	205
Total canal	106	0.517073	51.7073
201130_P6aid_pwrt2_A_11-12
	um	%
Head	74
Canal anterior	32	0.432432	43.2432	-43.2432
Rest of body	141
Canal posterior	89	0.631206	63.1206
Total body	215
Total canal	121	0.562791	56.2791
201130_P6aid_pwrt2_A_13-14
	um	%
Head	75
Canal anterior	32	0.426667	42.6667	-42.6667
Rest of body	150
Canal posterior	89	0.593333	59.3333
Total body	225
Total canal	121	0.537778	53.7778
201130_P6aid_pwrt2_A_15-16
	um	%
Head	73
Canal anterior	34	0.465753	46.5753	-46.5753
Rest of body	150
Canal posterior	88	0.586667	58.6667
Total body	223
Total canal	122	0.547085	54.7085

## Sheet: Control
201130_P6aid_pwrt2_C_1-3
	um	%
Head	72
Canal anterior	30	0.416667	41.6667	-41.6667
Rest of body	122
Canal posterior	89	0.729508	72.9508
Total body	194
Total canal	119	0.613402	61.3402
201130_P6aid_pwrt2_C_4-6
	um	%
Head	69
Canal anterior	26	0.376812	37.6812	-37.6812
Rest of body	145
Canal posterior	79	0.544828	54.4828
Total body	214
Total canal	105	0.490654	49.0654
201130_P6aid_pwrt2_C_7-8
	um	%
Head	72
Canal anterior	40	0.555556	55.5556	-55.5556
Rest of body	147
Canal posterior	104	0.707483	70.7483
Total body	219
Total canal	144	0.657534	65.7534
201130_P6aid_pwrt2_C_9-10
	um	%
Head	73
Canal anterior	38	0.520548	52.0548	-52.0548
Rest of body	142
Canal posterior	77	0.542254	54.2254
Total body	215
Total canal	115	0.534884	53.4884
201130_P6aid_pwrt2_C_11-12
	um	%
Head	69
Canal anterior	33	0.478261	47.8261	-47.8261
Rest of body	127
Canal posterior	77	0.606299	60.6299
Total body	196
Total canal	110	0.561224	56.1224
201130_P6aid_pwrt2_C_13-14
	um	%
Head	75
Canal anterior	38	0.506667	50.6667	-50.6667
Rest of body	138
Canal posterior	88	0.637681	63.7681
Total body	213
Total canal	126	0.591549	59.1549
201130_P6aid_pwrt2_C_15-16
	um	%
Head	74
Canal anterior	34	0.459459	45.9459	-45.9459
Rest of body	148
Canal posterior	81	0.547297	54.7297
Total body	222
Total canal	115	0.518018	51.8018
201130_P6aid_pwrt2_C_17-18
	um	%
Head	74
Canal anterior	26	0.351351	35.1351	-35.1351
Rest of body	142
Canal posterior	76	0.535211	53.5211
Total body	216
Total canal	102	0.472222	47.2222
201130_P6aid_pwrt2_C_19-20
	um	%
Head	72
Canal anterior	35	0.486111	48.6111	-48.6111
Rest of body	143
Canal posterior	80	0.559441	55.9441
Total body	215
Total canal	115	0.534884	53.4884
201130_P6aid_pwrt2_C_
	um	%
Head	72
Canal anterior	29	0.402778	40.2778	-40.2778
Rest of body	143
Canal posterior	87	0.608392	60.8392
Total body	215
Total canal	116	0.539535	53.9535
