# Supplementary material for: Epidermal PAR-6 and PKC-3 are essential for larval development of C. elegans and organize non-centrosomal microtubules
Source: eLife journal article supplement (doi:10.7554/elife.62067), 2020-12-10
Supplement: fig3-figsupp2-data1 [file 2020-11 - rescue Pdpy7-par6.xlsx]

## Sheet: 1st day - 1 h
Control	Size (um)		Auxin	Size (um)		Auxin + rescue	Size (um)			Average	St dev
201130_P6aid_pwrt2_NGM-04	259.468		201130_P6aid_pwrt2_A-04	204.745		201130_par6aid_pwrt2_pdpy7par6_Auxin-10	238.98		Control	258.098	20.3205
201130_P6aid_pwrt2_NGM-03	234.21		201130_P6aid_pwrt2_A-03	206.391		201130_par6aid_pwrt2_pdpy7par6_Auxin-08	265.093		Auxin	218.459	16.7442
201130_P6aid_pwrt2_NGM-02	260.054		201130_P6aid_pwrt2_A-02	235.841		201130_par6aid_pwrt2_pdpy7par6_Auxin-15	279.364		Rescue	267.54	17.1579
201130_P6aid_pwrt2_NGM	247.595		201130_P6aid_pwrt2_A	207.652		201130_par6aid_pwrt2_Pdpy7par6_A-10	273.128
201130_P6aid_pwrt2_NGM-05	289.163		201130_P6aid_pwrt2_A-05	237.664		201130_par6aid_pwrt2_Pdpy7par6_A-07	281.137

## Sheet: 2nd day - 25 h
Control	Size (um)		Auxin	Size (um)		Auxin + rescue	Size (um)			Average	St dev
201201_P6aid_pwrt2_C-04	376.773		201201_P6aid_pwrt2_A-04	368.306		201201_P6aid_pwrt2_pdpy7par6_A-04	368.342		Control	424.111	35.7036
201201_P6aid_pwrt2_C-03	445.024		201201_P6aid_pwrt2_A-03	383.806		201201_P6aid_pwrt2_pdpy7par6_A-03	416.931		Auxin	338.627	43.1615
201201_P6aid_pwrt2_C-02	456.644		201201_P6aid_pwrt2_A-02	355.357		201201_P6aid_pwrt2_pdpy7par6_A-02	404.275		Rescue	428.092	46.7674
201201_P6aid_pwrt2_C	446.976		201201_P6aid_pwrt2_A	287.564		201201_P6aid_pwrt2_pdpy7par6_A	475.761
201201_P6aid_pwrt2_C-05	395.136		201201_P6aid_pwrt2_A-05	298.101		201201_P6aid_pwrt2_pdpy7par6_A-05	475.151

## Sheet: 3rd day - 49 h
Control	Size (um)		Auxin	Size (um)		Auxin + rescue	Size (um)			Average	St dev
201202_P6aid_pwrt2_C-06-07	841.854		201202_P6aid_pwrt2_A-03	408.298		201202_P6aid_pwrt2_pdpy7par6_A	761.24		Control	819.18	26.4279
201202_P6aid_pwrt2_C-05-04	820.798		201202_P6aid_pwrt2_A-02	332.733		201202_P6aid_pwrt2_pdpy7par6_A-02	830.688		Auxin	349.768	33.1793
201202_P6aid_pwrt2_C-03-02	810.659		201202_P6aid_pwrt2_A	331.678		201202_P6aid_pwrt2_pdpy7par6_A-03	774.473		Rescue	781.326	36.544
201202_P6aid_pwrt2_C	779.046		201202_P6aid_pwrt2_A-05	331.495		201202_P6aid_pwrt2_pdpy7par6_A-04	736.923
201202_P6aid_pwrt2_C-08-09	843.545		201202_P6aid_pwrt2_A-04	344.634		201202_P6aid_pwrt2_pdpy7par6_A-05	803.308
