# Supplementary material for: Epidermal PAR-6 and PKC-3 are essential for larval development of C. elegans and organize non-centrosomal microtubules
Source: eLife journal article supplement (doi:10.7554/elife.62067), 2020-12-10
Supplement: fig3-figsupp2-data1 [file 200124_seam_count.xlsx]

## Sheet: Sheet1
	Head	Vs	V5	Tail	Total				Head	Vs	V5	Tail	Total			Head	Vs	V5	Tail	Total	Rescue
200124_P6aid_Pdpy7par6_rescue_C_SV_2	4	20	1	2	27			Fused_150119_P6deg_wrt-2TIR_scGreen_A_to_A2	3	5	1	1	10		200124_P6aid_Pdpy7par6_rescue_A1_1	4	11	1	2	18
200124_P6aid_Pdpy7par6_rescue_C_SV_3	4	10	1	1	16			Fused_150119_P6deg_wrt-2TIR_scGreen_A2_to_A3	3	5	2	1	11		200124_P6aid_Pdpy7par6_rescue_A1_2	4	19	1	2	26
200124_P6aid_Pdpy7par6_rescue_C_SV_4	4	10	1	1	16			Fused_150119_P6deg_wrt-2TIR_scGreen_A5_to_6	3	5	1	1	10		200124_P6aid_Pdpy7par6_rescue_A1_3_1-to-6	3	10	1	1	15
200124_P6aid_Pdpy7par6_rescue_C_SV_5	3	10	1	1	15			Fused_150119_P6deg_wrt-2TIR_scGreen_A7_to_11	3	5	1	1	10		200124_P6aid_Pdpy7par6_rescue_A1_3_7-to-12	5	10	1	2	18
Fused_150119_P6deg_wrt2TIR_scGreen_C_41_to_43	5	10	1	5	21			Fused_150119_P6deg_wrt-2TIR_scGreen_A7_to_11	3	5	1	1	10		200124_P6aid_Pdpy7par6_rescue_A1_3_13-to-15	3	5	1	1	10
Fused_150119_P6deg_wrt2TIR_scGreen_C_44_to_45	5	19	1	2	27			Fused_150119_P6deg_wrt-2TIR_scGreen_A12_to_14	3	5	2	1	11
Fused_150119_P6deg_wrt2TIR_scGreen_C_46_to_49	4	10	1	2	17			150119_P6deg_wrt-2TIR_scGreen_A15	3	5	2	1	11		200124_P6aid_Pdpy7par6_rescue_A2_1	3	5	1	1	10
Fused_150119_P6deg_wrt2TIR_scGreen_C_50_to_53	4	10	1	3	18			Fused_150119_P6deg_wrt-2TIR_scGreen_A16_to_18	3	5	1	1	10		200124_P6aid_Pdpy7par6_rescue_A2_3	3	5	1	1	10
Fused_150119_P6deg_wrt-2TIR_scGreen_C_0_to_4	4	10	2	5	21			Fused_150119_P6deg_wrt-2TIR_scGreen_A19_to_21	3	5	1	1	10		200124_P6aid_Pdpy7par6_rescue_A2_4	4	10	1	1	16
Fused_150119_P6deg_wrt-2TIR_scGreen_C_5_to_8	5	20	4		29			150119_P6deg_wrt-2TIR_scGreen_A22	2	5	1	1	9		200124_P6aid_Pdpy7par6_rescue_A2_5	2	5	1	1	9
								Fused_150119_P6deg_wrt-2TIR_scGreen_A23_to_24	3	5	1	1	10
															200124_P6aid_Pdpy7par6_rescue_A3_1	5	19	1	2	27
								Auxin controls were bad = progeny coming from mothers with rescue… so I used data from another day							200124_P6aid_Pdpy7par6_rescue_A3_2	4	20	1	2	27
															200124_P6aid_Pdpy7par6_rescue_A3_3	4	14	2	2	22
															200124_P6aid_Pdpy7par6_rescue_A3_4	5	14	5	1	25
															200124_P6aid_Pdpy7par6_rescue_A4_1	3	5	1	1	10
															200124_P6aid_Pdpy7par6_rescue_A4_2	3	15	1	2	21
															200124_P6aid_Pdpy7par6_rescue_A4_3	5	17	1	2	25
