# Supplementary material for: Epidermal PAR-6 and PKC-3 are essential for larval development of C. elegans and organize non-centrosomal microtubules
Source: eLife journal article supplement (doi:10.7554/elife.62067), 2020-12-10
Supplement: fig3-figsupp2-data1 [file 200609 seam number.xlsx]

## Sheet: Auxin
Worm	Time	Hours dev	Head	Vs	V5	T	Total			08:00:00
Fused_200609_neklaid_chc1gfp_seam_L2_A_10-to-12	11:28:00	19:28:00	3	3	1	1	8
Fused_200609_neklaid_chc1gfp_seam_L2_A_16	12:28:00	20:28:00	3	9	0	2	14
Fused_200609_neklaid_chc1gfp_seam_L2_A_17-to-19	12:30:00	20:30:00	3	9	1	1	14
Fused_200609_neklaid_chc1gfp_seam_L2_A_20-to-21	12:36:00	20:36:00	4	6	2	1	13	good example of seam cells not visible
Fused_200609_neklaid_chc1gfp_seam_L2_A_22-to-24	12:38:00	20:38:00	3	9	1	1	14	good example of seam cells not visible
Fused_200609_neklaid_chc1gfp_seam_L2_A_25-to-27	12:40:00	20:40:00	3	6	2	1	12
Fused_200609_neklaid_chc1gfp_seam_L2_A_28-to-29	12:41:00	20:41:00	3	8	2	2	15
Fused_200609_neklaid_chc1gfp_seam_L2_A_31-to-33	13:59:00	21:59:00	2	4	1	1	8
Fused_200609_neklaid_chc1gfp_seam_L2_A_36-to-38	14:05:00	22:05:00	3	5	1	1	10
Fused_200609_neklaid_chc1gfp_seam_L2_A_39-to-40	14:09:00	22:09:00	1	5	1	1	8

## Sheet: Control
Worm	Time	Hours dev	Head	Vs	V5	T	Total			08:00:00
Fused_200609_neklaid_chc1gfp_seam_L2_C_15-to-17	11:22:00	19:22:00	3	6	2	1	12
Fused_200609_neklaid_chc1gfp_seam_L2_C_18-to-20	11:24:00	19:24:00	3	5	1	1	10
Fused_200609_neklaid_chc1gfp_seam_L2_C_21-to-24	11:50:00	19:50:00	3	8	2	1	14
Fused_200609_neklaid_chc1gfp_seam_L2_C_25-to-28	11:52:00	19:52:00	4	11	2	2	19
Fused_200609_neklaid_chc1gfp_seam_L2_C_37-to-39	13:50:00	21:50:00	4	10	1	1	16	has finished 2nd
Fused_200609_neklaid_chc1gfp_seam_L2_C_43-to-46	13:57:00	21:57:00	4	14	1	2	21
