# Supplementary material for: Epidermal PAR-6 and PKC-3 are essential for larval development of C. elegans and organize non-centrosomal microtubules
Source: eLife journal article supplement (doi:10.7554/elife.62067), 2020-12-10
Supplement: fig4-figsupp2-data1 [file 190122_P6AID_PKC3mCh_background.xlsx]

## Sheet: Control
220119_P6deg_pwrt2TIR_mChPKC3_C_12	220119_P6deg_pwrt2TIR_mChPKC3_C_14	220119_P6deg_pwrt2TIR_mChPKC3_C_15	220119_P6deg_pwrt2TIR_mChPKC3_C_16	220119_P6deg_pwrt2TIR_mChPKC3_C_17	/1000	220119_P6deg_pwrt2TIR_mChPKC3_C_12	220119_P6deg_pwrt2TIR_mChPKC3_C_14	220119_P6deg_pwrt2TIR_mChPKC3_C_15	220119_P6deg_pwrt2TIR_mChPKC3_C_16	220119_P6deg_pwrt2TIR_mChPKC3_C_17	backrogund corrected	220119_P6deg_pwrt2TIR_mChPKC3_C_12	220119_P6deg_pwrt2TIR_mChPKC3_C_14	220119_P6deg_pwrt2TIR_mChPKC3_C_15	220119_P6deg_pwrt2TIR_mChPKC3_C_16	220119_P6deg_pwrt2TIR_mChPKC3_C_17
		2343765	1462490					2343.76	1462.49					1882.28	963.117
		2490998	1407138	1608368				2491	1407.14	1608.37				2029.51	907.765	1138.01
		2495050	1350697	1472081				2495.05	1350.7	1472.08				2033.57	851.324	1001.72
		2488913	1354794	1373311				2488.91	1354.79	1373.31				2027.43	855.421	902.949
		2421308	1418453	1380402				2421.31	1418.45	1380.4				1959.82	919.08	910.04
		2284547	1591585	1446298				2284.55	1591.59	1446.3				1823.06	1092.21	975.936
		2134955	1705322	1372976				2134.95	1705.32	1372.98				1673.47	1205.95	902.614
		2163818	1903140	1415731				2163.82	1903.14	1415.73				1702.33	1403.77	945.369
		2198458	1967422	1522673				2198.46	1967.42	1522.67				1736.97	1468.05	1052.31
	1951662	2319212	1954484	1615166			1951.66	2319.21	1954.48	1615.17			1484.91	1857.73	1455.11	1144.8
	1943762	2456808	1712830	1643457			1943.76	2456.81	1712.83	1643.46			1477.01	1995.32	1213.46	1173.1
	1948012	2719912	1540820	1650233			1948.01	2719.91	1540.82	1650.23			1481.26	2258.43	1041.45	1179.87
	1924506	2707645	1587773	1554198			1924.51	2707.64	1587.77	1554.2			1457.76	2246.16	1088.4	1083.84
1278709	1968198	2596258	1480640	1612882		1278.71	1968.2	2596.26	1480.64	1612.88		808.347	1501.45	2134.77	981.267	1142.52	1313.67	525.502
1244735	2136062	2599373	1450433	1544272		1244.73	2136.06	2599.37	1450.43	1544.27		774.373	1669.31	2137.89	951.06	1073.91	1321.31	566.864
1287739	2141175	2286410	1632599	1559911		1287.74	2141.18	2286.41	1632.6	1559.91		817.377	1674.43	1824.93	1133.23	1089.55	1307.9	424.399
1355446	2119066	2206638	1709401	1590948		1355.45	2119.07	2206.64	1709.4	1590.95		885.084	1652.32	1745.15	1210.03	1120.59	1322.63	364.749
1364007	2103542	2070296	1745259	1655144		1364.01	2103.54	2070.3	1745.26	1655.14		893.645	1636.79	1608.81	1245.89	1184.78	1313.98	311.907
1345999	2162503	2124351	1755938	1875906		1346	2162.5	2124.35	1755.94	1875.91		875.637	1695.75	1662.87	1256.57	1405.54	1379.27	335.404
1436276	1962986	2168672	1859042	1820458		1436.28	1962.99	2168.67	1859.04	1820.46		965.914	1496.24	1707.19	1359.67	1350.1	1375.82	270.763
1375051	2065854	2200003	2065818	1928159		1375.05	2065.85	2200	2065.82	1928.16		904.689	1599.1	1738.52	1566.45	1457.8	1453.31	322.647
1344438	2129214	2570444	2101659	1988916		1344.44	2129.21	2570.44	2101.66	1988.92		874.076	1662.46	2108.96	1602.29	1518.55	1553.27	443.178
1404816	2040380	3146842	2200667	2231529		1404.82	2040.38	3146.84	2200.67	2231.53		934.454	1573.63	2685.36	1701.29	1761.17	1731.18	626.866
1380500	2029558	3390587	2417310	2304692		1380.5	2029.56	3390.59	2417.31	2304.69		910.138	1562.81	2929.1	1917.94	1834.33	1830.86	730.293
1443604	2356224	3548983	2688901	2529164		1443.6	2356.22	3548.98	2688.9	2529.16		973.242	1889.48	3087.5	2189.53	2058.8	2039.71	755.082
1811792	2933932	3716786	2897105	3027219		1811.79	2933.93	3716.79	2897.11	3027.22		1341.43	2467.18	3255.3	2397.73	2556.86	2403.7	685.778
2013877	3154010	3768850	2962456	3145448		2013.88	3154.01	3768.85	2962.46	3145.45		1543.51	2687.26	3307.37	2463.08	2675.09	2535.26	637.881
2027572	3166804	3930986	2965631	3161519		2027.57	3166.8	3930.99	2965.63	3161.52		1557.21	2700.06	3469.5	2466.26	2691.16	2576.84	685.013
1878438	2900238	3593971	2621370	2953587		1878.44	2900.24	3593.97	2621.37	2953.59		1408.08	2433.49	3132.49	2122	2483.22	2315.85	626.574
1859683	2824425	3225444	2132795	2858394		1859.68	2824.43	3225.44	2132.8	2858.39		1389.32	2357.68	2763.96	1633.42	2388.03	2106.48	572.877
1742491	2793938	3108146	1994261	2875057		1742.49	2793.94	3108.15	1994.26	2875.06		1272.13	2327.19	2646.66	1494.89	2404.69	2029.11	606.156
1717544	2746467	2708642	1943040	2667763		1717.54	2746.47	2708.64	1943.04	2667.76		1247.18	2279.72	2247.16	1443.67	2197.4	1883.03	496.518
1684365	2749862	2814192	1937516	2387588		1684.37	2749.86	2814.19	1937.52	2387.59		1214	2283.11	2352.71	1438.14	1917.23	1841.04	504.613
1757133	2527875	2739391	2093382	2368646		1757.13	2527.88	2739.39	2093.38	2368.65		1286.77	2061.13	2277.91	1594.01	1898.28	1823.62	390.285
1835411	2366082	2721583	2154251	2437266		1835.41	2366.08	2721.58	2154.25	2437.27		1365.05	1899.33	2260.1	1654.88	1966.9	1829.25	337.409
1843632	2440292	2771222	2075396	2505050		1843.63	2440.29	2771.22	2075.4	2505.05		1373.27	1973.54	2309.74	1576.02	2034.69	1853.45	375.169
1981074	2355993	2797346	2164087	2622360		1981.07	2355.99	2797.35	2164.09	2622.36		1510.71	1889.24	2335.86	1664.71	2152	1910.51	339.097
2127543	2265016	2978977	2165027	2626993		2127.54	2265.02	2978.98	2165.03	2626.99		1657.18	1798.27	2517.49	1665.65	2156.63	1959.05	372.14
2079448	2330872	3272851	2119665	2689309		2079.45	2330.87	3272.85	2119.66	2689.31		1609.09	1864.12	2811.37	1620.29	2218.95	2024.76	504.639
1972956	2264176	3175062	1981548	2581159		1972.96	2264.18	3175.06	1981.55	2581.16		1502.59	1797.43	2713.58	1482.17	2110.8	1921.31	511.64
1688100	2251425	2836316	2002859	2488328		1688.1	2251.43	2836.32	2002.86	2488.33		1217.74	1784.68	2374.83	1503.49	2017.97	1779.74	448.072
1635906	2136826	2524147	1915996	2384941		1635.91	2136.83	2524.15	1916	2384.94		1165.54	1670.08	2062.66	1416.62	1914.58	1645.9	363.928
1703094	2112093	2332635	2077943	2470835		1703.09	2112.09	2332.64	2077.94	2470.84		1232.73	1645.34	1871.15	1578.57	2000.47	1665.65	295.698
1795547	2114798	2323806	2153176	2381021		1795.55	2114.8	2323.81	2153.18	2381.02		1325.18	1648.05	1862.32	1653.8	1910.66	1680	231.325
1603744	2270485		2168390	2332019		1603.74	2270.49		2168.39	2332.02		1133.38	1803.74		1669.02	1861.66
1628816	2426593		2170387	2220989		1628.82	2426.59		2170.39	2220.99		1158.45	1959.84		1671.01	1750.63
	2478156		2008684	2197542			2478.16		2008.68	2197.54			2011.41		1509.31	1727.18
	2546427		2021950	2563788			2546.43		2021.95	2563.79			2079.68		1522.58	2093.43
	2641838		2214079	2709053			2641.84		2214.08	2709.05			2175.09		1714.71	2238.69
			2387438						2387.44						1888.07
			2416780						2416.78						1917.41
			2457346						2457.35						1957.97
			2315797						2315.8						1816.42
			2043187						2043.19						1543.81
			2052420						2052.42						1553.05
			2115272						2115.27						1615.9
			2258104						2258.1						1758.73
			2218129						2218.13						1718.76
			2040140						2040.14						1540.77
			2116171						2116.17						1616.8
			2009843						2009.84						1510.47

## Sheet: Auxin
220119_P6deg_pwrt2TIR_mChPKC3_A_12	220119_P6deg_pwrt2TIR_mChPKC3_A_8	220119_P6deg_pwrt2TIR_mChPKC3_A_4	220119_P6deg_pwrt2TIR_mChPKC3_A_7	220119_P6deg_pwrt2TIR_mChPKC3_A_11	/1000	220119_P6deg_pwrt2TIR_mChPKC3_A_12	220119_P6deg_pwrt2TIR_mChPKC3_A_8	220119_P6deg_pwrt2TIR_mChPKC3_A_4	220119_P6deg_pwrt2TIR_mChPKC3_A_7	220119_P6deg_pwrt2TIR_mChPKC3_A_11	background	220119_P6deg_pwrt2TIR_mChPKC3_A_12	220119_P6deg_pwrt2TIR_mChPKC3_A_8	220119_P6deg_pwrt2TIR_mChPKC3_A_4	220119_P6deg_pwrt2TIR_mChPKC3_A_7	220119_P6deg_pwrt2TIR_mChPKC3_A_11
2028513			2775143	2134718		2028.51			2775.14	2134.72		1570.5			2302.24	1640.71		average	stdev
2075152	2246719	2524143	2746588	2024665		2075.15	2246.72	2524.14	2746.59	2024.66		1617.14	1762.49	2029.22	2273.69	1530.65		1842.64	306.277
2041171	2247698	2496368	2525668	1986321		2041.17	2247.7	2496.37	2525.67	1986.32		1583.16	1763.47	2001.44	2052.77	1492.31		1778.63	247.596
2187024	2196368	2471419	2490789	1962487		2187.02	2196.37	2471.42	2490.79	1962.49		1729.01	1712.14	1976.49	2017.89	1468.48		1780.8	223.299
2214465	2249909	2312825	2448339	1873495		2214.47	2249.91	2312.82	2448.34	1873.49		1756.45	1765.68	1817.9	1975.44	1379.48		1738.99	219.315
2191300	2179603	2336392	2473881	1845128		2191.3	2179.6	2336.39	2473.88	1845.13		1733.29	1695.37	1841.47	2000.98	1351.12		1724.44	240.033
2134608	2141605	2405938	2502697	1999393		2134.61	2141.61	2405.94	2502.7	1999.39		1676.6	1657.38	1911.01	2029.8	1505.38		1756.03	210.852
2273161	2121283	2203231	2534073	2117739		2273.16	2121.28	2203.23	2534.07	2117.74		1815.15	1637.05	1708.31	2061.17	1623.73		1769.08	180.064
2158142	2205539	2235742	2432826	2025090		2158.14	2205.54	2235.74	2432.83	2025.09		1700.13	1721.31	1740.82	1959.92	1531.08		1730.65	152.904
2264482	2144027	2237497	2527193	1973655		2264.48	2144.03	2237.5	2527.19	1973.65		1806.47	1659.8	1742.57	2054.29	1479.64		1748.55	210.391
2159735	2269530	2093923	2422295	2114373		2159.74	2269.53	2093.92	2422.3	2114.37		1701.72	1785.3	1599	1949.39	1620.36		1731.16	142.449
2285304	2239169	2154391	2394734	2045932		2285.3	2239.17	2154.39	2394.73	2045.93		1827.29	1754.94	1659.47	1921.83	1551.92		1743.09	143.804
2439153	2242270	2028838	2445614	2088041		2439.15	2242.27	2028.84	2445.61	2088.04		1981.14	1758.04	1533.91	1972.71	1594.03		1767.97	207.665
2396709	2188510	1973334	2549384	2178038		2396.71	2188.51	1973.33	2549.38	2178.04		1938.7	1704.28	1478.41	2076.48	1684.03		1776.38	233.946
2433345	2345273	2107380	2249135	2204131		2433.34	2345.27	2107.38	2249.14	2204.13		1975.33	1861.04	1612.45	1776.23	1710.12		1787.04	139.144
2497871	2418403	2115169	2075991	2204275		2497.87	2418.4	2115.17	2075.99	2204.28		2039.86	1934.17	1620.24	1603.09	1710.26		1781.53	195.555
2586438	2565474	2052975	1999615	2218967		2586.44	2565.47	2052.97	1999.62	2218.97		2128.43	2081.24	1558.05	1526.71	1724.96		1803.88	285.37
2675360	2415339	2217227	1868734	2267735		2675.36	2415.34	2217.23	1868.73	2267.74		2217.35	1931.11	1722.3	1395.83	1773.72		1808.06	300.467
2585188	2365468	2192863	1913260	2078863		2585.19	2365.47	2192.86	1913.26	2078.86		2127.18	1881.24	1697.94	1440.36	1584.85		1746.31	267.058
2664709	2397439	2326860	1847563	2062222		2664.71	2397.44	2326.86	1847.56	2062.22		2206.7	1913.21	1831.93	1374.66	1568.21		1778.94	320.804
2735812	2547203	2221359	1914305	2196792		2735.81	2547.2	2221.36	1914.31	2196.79		2277.8	2062.97	1726.43	1441.4	1702.78		1842.28	328.62
2668991	2547039	2115241	1854901	2320195		2668.99	2547.04	2115.24	1854.9	2320.2		2210.98	2062.81	1620.32	1382	1826.18		1820.46	333.008
2595533	2684801	2014750	1766994	2262431		2595.53	2684.8	2014.75	1766.99	2262.43		2137.52	2200.57	1519.82	1294.09	1768.42		1784.09	390.048
2596662	2544536	1900625	1694250	2264433		2596.66	2544.54	1900.62	1694.25	2264.43		2138.65	2060.31	1405.7	1221.35	1770.42		1719.29	400.329
2677846	2620918	1892656	1911044	2272364		2677.85	2620.92	1892.66	1911.04	2272.36		2219.83	2136.69	1397.73	1438.14	1778.35		1794.15	381.667
2741510	2603618	1832509	1933887	2136355		2741.51	2603.62	1832.51	1933.89	2136.36		2283.5	2119.39	1337.58	1460.99	1642.34		1768.76	413.677
2774924	2626871	1966422	1820881	2337310		2774.92	2626.87	1966.42	1820.88	2337.31		2316.91	2142.64	1471.5	1347.98	1843.3		1824.47	417.049
2562697	2667669	2126583	1906323	2310569		2562.7	2667.67	2126.58	1906.32	2310.57		2104.68	2183.44	1631.66	1433.42	1816.56		1833.95	315.074
2658883	2673579	2081733	1863915	2240604		2658.88	2673.58	2081.73	1863.91	2240.6		2200.87	2189.35	1586.81	1391.01	1746.59		1822.93	362.366
2642167	2511660	2005118	1852267	2271926		2642.17	2511.66	2005.12	1852.27	2271.93		2184.15	2027.43	1510.19	1379.37	1777.91		1775.81	338.298
2751480	2413728	2077256	1729817	2283087		2751.48	2413.73	2077.26	1729.82	2283.09		2293.47	1929.5	1582.33	1256.92	1789.08		1770.26	386.748
2928414	2560990	2218733	1839830	2225200		2928.41	2560.99	2218.73	1839.83	2225.2		2470.4	2076.76	1723.81	1366.93	1731.19		1873.82	417.397
2695665	2408328	2394617	1848138	2129092		2695.66	2408.33	2394.62	1848.14	2129.09		2237.65	1924.1	1899.69	1375.24	1635.08		1814.35	325.373
		2509161						2509.16						2014.24

## Sheet: Averages
	CONTROL				AUXIN
	Averages		Stdev		Averages		Stdev
	PAR-6	PKC-3	PAR-6	PKC-3	PAR-6	PKC-3	PAR-6	PKC-3
1	1373.27	1787.34	197.125	517.268	801.122	2219.81	149.748	213.158
2	1403.47	1794.97	222.223	558.507	825.565	2205.26	132.967	234.468
3	1407.44	1781.57	243.227	418.143	859.722	2236.85	142.578	209.27
4	1446.11	1796.3	256.22	359.384	857.698	2249.9	147.812	171.378
5	1399.22	1787.65	291.993	307.614	861.109	2211.47	131.884	147.652
6	1405.97	1852.94	300.708	330.31	836.497	2229.37	131.648	201.662
7	1406.48	1849.49	264.933	267.6	816.21	2211.97	109.585	135.774
8	1395.69	1926.98	272.534	323.16	823.614	2223.91	106.314	131.996
9	1431.66	2026.93	269.974	441.218	833.917	2248.78	91.9496	193.158
10	1568.82	2204.85	328.054	623.535	842.674	2257.2	88.0825	221.585
11	1739.46	2304.53	437.554	728.299	843.161	2267.85	144.35	126.04
12	1856.52	2513.38	527.74	753.765	847.092	2262.34	168.281	186.807
13	1843.87	2877.37	534.318	683.03	892.34	2284.69	100.81	278.016
14	1863.03	3008.93	421.778	634.321	843.812	2288.88	81.2596	294.73
15	1926.03	3050.5	370.03	680.935	859.638	2227.13	90.9716	259.333
16	1913.52	2789.52	358.405	621.422	863.183	2259.76	111.052	314.789
17	1881.31	2580.15	312.396	564.069	865.132	2323.09	88.8349	321.703
18	1813.52	2502.78	304.757	597.173	872.829	2301.27	97.5359	327.808
19	1763.91	2356.69	334.217	487.898	888.588	2264.9	104.58	386.046
20	1733.76	2314.7	300.715	495.924	909.086	2200.1	115.006	395.476
21	1741.82	2297.29	348.668	383.1	923.656	2274.97	98.4653	374.367
22	1698.05	2302.92	322.807	330.902	934.283	2249.58	96.2694	404.28
23	1668.51	2327.12	328.824	367.022	927.74	2305.28	82.6968	410.633
24	1691.94	2384.17	362.646	331.348	911.81	2314.77	104.466	311.555
25	1669.98	2432.71	261.43	363.681	930.032	2303.74	127.265	356.941
26	1649.94	2498.43	191.612	495.794	950.95	2256.63	131.006	331.919
27	1616.98	2394.98	247.059	502.327	973.616	2251.07	159.979	380.726
28	1602.97	2253.41	251.914	440.829	995.322	2354.63	95.6152	409.894
29	1608.73	2119.56	296.459	356.993	959.244	2295.17	138.344	320.355
