# Supplementary material for: Epidermal PAR-6 and PKC-3 are essential for larval development of C. elegans and organize non-centrosomal microtubules
Source: eLife journal article supplement (doi:10.7554/elife.62067), 2020-12-10
Supplement: fig4-figsupp2-data1 [file 191030_PKC3AID_P6mCH_L3_background.xlsx]

## Sheet: Control
Pixel	191030_PKC3AID_P3mCh_L3_C_5_w1SpinningDisc - Green	191030_PKC3AID_P3mCh_L3_C_5_w2SpinningDisc - Red	191030_PKC3AID_P3mCh_L3_C_10_w1SpinningDisc - Green	191030_PKC3AID_P3mCh_L3_C_10_w2SpinningDisc - Red	191030_PKC3AID_P6mCh_L3_C_8_w1SpinningDisc - Green	191030_PKC3AID_P6mCh_L3_C_8_w2SpinningDisc - Red	191030_PKC3AID_P6mCh_L3_C_7_w1SpinningDisc - Green	191030_PKC3AID_P6mCh_L3_C_7_w2SpinningDisc - Red	191030_PKC3AID_P6mCh_L3_C_6_w1SpinningDisc - Green	191030_PKC3AID_P6mCh_L3_C_6_w2SpinningDisc - Red		191030_PKC3AID_P3mCh_L3_C_5_w1SpinningDisc - Green	191030_PKC3AID_P3mCh_L3_C_5_w2SpinningDisc - Red	191030_PKC3AID_P3mCh_L3_C_10_w1SpinningDisc - Green	191030_PKC3AID_P3mCh_L3_C_10_w2SpinningDisc - Red	191030_PKC3AID_P6mCh_L3_C_8_w1SpinningDisc - Green	191030_PKC3AID_P6mCh_L3_C_8_w2SpinningDisc - Red	191030_PKC3AID_P6mCh_L3_C_7_w1SpinningDisc - Green	191030_PKC3AID_P6mCh_L3_C_7_w2SpinningDisc - Red	191030_PKC3AID_P6mCh_L3_C_6_w1SpinningDisc - Green	191030_PKC3AID_P6mCh_L3_C_6_w2SpinningDisc - Red
0
1							847.721	763.446										478.404	314.458
2							879.749	793.2										510.432	344.212
3							883.324	773.684										514.007	324.696
4	755.521	993.44					833.409	853.497				378.322	562.106					464.092	404.509
5	761.595	916.947					817.435	771.573	1095.81	1040.87		384.396	485.613					448.118	322.585	697.899	583.424
6	779.471	883.451					852.148	826.844	1056.7	1052.68		402.272	452.117					482.831	377.856	658.79	595.234
7	776.259	889.084					802.917	839.329	1077.48	1073.28		399.06	457.75					433.6	390.341	679.566	615.83
8	800.425	840.623			750.815	754.065	816.495	860.385	1023.78	1123.96		423.226	409.289			381.452	306.489	447.178	411.397	625.864	666.512
9	838.237	790.324			749.285	732.283	849.588	848.84	1062.95	1077.06		461.038	358.99			379.922	284.707	480.271	399.852	665.04	619.611		PKC-3 AID		PAR-6 mCh
10	805.912	848.15			706.361	750.289	843.83	863.89	1022.77	1042.17		428.713	416.816			336.998	302.713	474.513	414.902	624.852	584.724		Average	Stdev	Average	Stdev
11	819.217	885.703	1018.56	923.245	762.701	729.936	831.633	903.603	1008.14	1001.73		442.018	454.369	658.495	509.535	393.338	282.36	462.316	454.615	610.223	544.282		513.278	114.616	449.032	100.713
12	835.392	920.387	983.667	930.532	799.605	754.402	816.448	876.014	1021.8	982.508		458.193	489.053	623.599	516.822	430.242	306.826	447.131	427.026	623.889	525.059		516.611	98.304	452.957	90.2871
13	854.469	950.195	1028.65	918.742	783.097	835.58	783.275	854.528	1014.13	1056.71		477.27	518.861	668.582	505.032	413.734	388.004	413.958	405.54	616.218	599.264		517.952	117.98	483.34	87.0524
14	846.943	943.696	945.851	935.648	828.598	843.512	829.8	819.583	983.937	1088.09		469.744	512.362	585.783	521.938	459.235	395.936	460.483	370.595	586.023	630.639		512.254	67.3549	486.294	105.281
15	851.05	958.933	1007.53	961.403	837.032	814.528	798.706	827.447	950.635	1187.14		473.851	527.599	647.463	547.693	467.669	366.952	429.389	378.459	552.721	729.688		514.219	86.9324	510.078	148.121
16	820.577	936.403	1052.45	929.029	803.678	837.983	885.77	877.776	1082.32	1238.06		443.378	505.069	692.378	515.319	434.315	390.407	516.453	428.788	684.404	780.612		554.186	126.615	524.039	152.64
17	855.764	885.808	1056.82	898.144	758.198	821.705	825.761	817.849	1182.55	1318.32		478.565	454.474	696.747	484.434	388.835	374.129	456.444	368.861	784.637	860.873		561.046	170.154	508.554	203.236
18	839.429	858.791	965.112	874.876	718.844	866.735	844.818	811.435	1218.22	1235.75		462.23	427.457	605.044	461.166	349.481	419.159	475.501	362.447	820.308	778.299		542.513	179.776	489.706	165.187
19	840.821	912.766	973.777	900.627	698	847.191	808.912	783.777	1291.2	1231.63		463.622	481.432	613.709	486.917	328.637	399.615	439.595	334.789	893.289	774.179		547.77	218.251	495.386	168.044
20	933.609	876.644	994.743	927.542	684.282	837.071	869.66	756.035	1180.88	1235.2		556.41	445.31	634.675	513.832	314.919	389.495	500.343	307.047	782.964	777.756		557.862	172.412	486.688	179.504
21	906.238	903.505	1023.08	875.003	684.529	785.623	821.741	771.178	1027.67	1179.75		529.039	472.171	663.008	461.293	315.166	338.047	452.424	322.19	629.759	722.299		517.879	140.607	463.2	160.284
22	905.109	885.685	1037.2	898.312	712.039	792.817	857.152	822.399	974.714	1055.85		527.91	454.351	677.134	484.602	342.676	345.241	487.835	373.411	576.8	598.402		522.471	122.91	451.201	100.091
23	834.764	866.666	1061.34	987.017	698.791	753.305	882.667	827.601	986.705	1026.4		457.565	435.332	701.268	573.307	329.428	305.729	513.35	378.613	588.791	568.951		518.08	139.492	452.386	117.74
24	871.818	880.183	1078.37	992.659	639.809	669.355	916.618	797.048	990.863	1025.97		494.619	448.849	718.303	578.949	270.446	221.779	547.301	348.06	592.949	568.518		524.724	164.469	433.231	151.448
25	840.304	916.9	1075.31	911.078	664.009	708.541	955.048	851.157	943.446	1016.35		463.105	485.566	715.24	497.368	294.646	260.965	585.731	402.169	545.532	558.904		520.851	155.812	440.994	115.093
26	859.152	861.272	1008.56	956.824	690.506	726.085	863.326	856.491	988.33	1089.17		481.953	429.938	648.496	543.114	321.143	278.509	494.009	407.503	590.416	631.722		507.203	124.818	458.157	135.072
27	852.189	904.422	1121.37	1065.38	722.739	668.918	827.473	884.499	1016.57	1080.52		474.99	473.088	761.299	651.672	353.376	221.342	458.156	435.511	618.659	623.069		533.296	158.658	480.936	172.385
28	884.922	938.332	1246.39	1090.25	738.479	700.713	834.96	964.571	1028.81	1176.39		507.723	506.998	886.323	676.54	369.116	253.137	465.643	515.583	630.894	718.939		571.94	199.294	534.239	183.352
29	796.77	939.754	1223.31	1137.51	758.778	791.927	960.655	1019.16	1122.5	1185.76		419.571	508.42	863.237	723.802	389.415	344.351	591.338	570.172	724.585	728.313		597.629	201.099	575.012	160.703
30	784.654	940.009	1256.72	1243.24	797.766	738.559	911.786	1100.09	1217.56	1199.12		407.455	508.675	896.657	829.528	428.403	290.983	542.469	651.101	819.641	741.674		618.925	225.99	604.392	211.602
31	822.926	1115.57	1255.21	1321.78	870.838	812.603	1031.73	1037.77	1192.86	1344.31		445.727	684.235	895.146	908.067	501.475	365.027	662.413	588.782	794.948	886.863		659.942	190.101	686.595	224.798
32	922.846	1143.24	1258.58	1268.52	1108.75	962.855	1074.63	1067.36	1384.7	1461.96		545.647	711.907	898.511	854.808	739.385	515.279	705.317	618.367	986.789	1004.51		775.13	172.363	740.975	193.149
33	1085.46	1236.55	1192.37	1248.73	1261.14	1149.67	1125.63	1026.56	1505.07	1416.04		708.257	805.212	832.297	835.017	891.773	702.09	756.313	577.57	1107.15	958.588		859.159	155.432	775.695	143.624
34	1164.26	1366.28	1316.66	1252.03	1392.54	1154.42	1183.14	1124.73	1495.76	1472.39		787.058	934.948	956.596	838.323	1023.18	706.847	813.82	675.747	1097.84	1014.94		935.699	133.537	834.161	145.052
35	1129	1320.86	1356.09	1169.9	1357.15	1301.93	1102.21	1138.33	1383.31	1435.17		751.802	889.523	996.025	756.193	987.788	854.357	732.898	689.337	985.392	977.718		890.781	135.72	833.426	113.062
36	1033.15	1151.45	1201.98	1195.77	1286.1	1340.12	1148.34	1048.42	1253.05	1384.67		655.947	720.114	841.909	782.063	916.741	892.549	779.023	599.437	855.139	927.223		809.752	98.9204	784.277	132.706
37	988.888	1091.93	1137.41	1114.65	1206.18	1146	1118.29	975.99	1232.13	1297.54		611.689	660.6	777.341	700.941	836.816	698.422	748.975	527.002	834.217	840.092		761.808	91.9388	685.411	111.854
38	1002.56	1099.95	1192.21	1126.84	1068.27	1063.17	1005.26	1046.72	1141.34	1268.55		625.36	668.616	832.146	713.126	698.902	615.59	635.943	597.729	743.43	811.103		707.156	84.8061	681.233	85.622
39	1080	1014.11	1210.49	1069.72	986.407	1034.55	1004.1	1081.47	1315.21	1184.52		702.802	582.778	850.421	656.006	617.044	586.971	634.779	632.487	917.299	727.07		744.469	133.324	637.062	59.0278
40	1076.3	1088.99	1198.74	1079.76	1017.01	1043.13	994.137	1073.07	1173.89	1151.95		699.096	657.653	838.668	666.047	647.647	595.552	624.82	624.085	775.973	694.5		717.241	89.3143	647.567	38.4152
41	1108.55	1117.56	1098.01	1071.98	1054.47	945.764	944.453	1020.76	1078.29	1089.11		731.35	686.221	737.945	658.272	685.108	498.188	575.136	571.776	680.377	631.665		681.983	65.1872	609.224	75.1152
42	1138.45	1178.72	1115.13	1077.08	963.791	835.907	960.22	1021.3	1024.03	1164.15		761.251	747.388	755.059	663.372	594.428	388.331	590.903	572.31	626.115	706.7		665.551	85.6682	615.62	142.719
43	1099.04	1280.76	1185.76	1112.27	918.397	857.818	926.513	1120.54	988.587	1111.77		721.842	849.429	825.691	698.561	549.034	410.242	557.196	671.551	590.673	654.319		648.887	120.777	656.82	158.007
44	1069.72	1254.65	1238.35	1068.6	862.913	839.414	917.086	1098.09	1029.06	1207.2		692.517	823.314	878.284	654.89	493.55	391.838	547.769	649.102	631.147	749.754		648.653	149.328	653.78	163.24
45	1078.12	1145.93	1219.22	1065.81	927.851	860.349	847.798	1073.83	1103.1	1306.67		700.918	714.592	859.157	652.098	558.488	412.773	478.481	624.838	705.185	849.217		660.446	147.167	650.704	158.722
46	1008.87	1150.81	1198.25	1105.11	968.799	847.391	874.281	1023.5	1159.07	1472.41		631.666	719.475	838.186	691.402	599.436	399.815	504.964	574.507	761.155	1014.96		667.081	132.513	680.032	225.565
47	933.688	1125.89	1143.86	1045.13	1041.18	850.944	821.033	938.777	1145.97	1508.95		556.489	694.558	783.788	631.42	671.813	403.368	451.716	489.789	748.059	1051.5		642.373	137.623	654.128	249.973
48	879.285	1124.16	1224.88	1077.99	972.892	909.495	922.295	980.657	1135.74	1459.5		502.086	692.822	864.812	664.282	603.529	461.919	552.978	531.669	737.831	1002.05		652.247	147.72	670.548	208.111
49	856.956	1141.15	1083.39	1144.23	993.597	888.619	933.912	1005.18	1216.04	1392.99		479.757	709.813	723.325	730.519	624.234	441.043	564.595	556.19	818.128	935.539		642.008	132.538	674.621	187.767
50	927.841	1101.45	1140.24	1035.69	865.774	979.977	775.96	988.601	1206.25	1463.32		550.642	670.113	780.171	621.979	496.411	532.401	406.643	539.613	808.338	1005.88		608.441	177.527	673.996	194.276
51	1030.44	1199.72	1232.08	961.983	876.058	962.068	799.614	1038.31	1369.19	1346.39		653.24	768.388	872.016	548.273	506.695	514.492	430.297	589.318	971.273	888.942		686.704	231.618	661.883	160.309
52	1018.24	1172.07	1155.05	1094.68	934.296	980.823	826.132	1013.24	1295.59	1422.7		641.039	740.734	794.985	680.975	564.933	533.247	456.815	564.247	897.676	965.253		671.09	176.619	696.891	172.168
53	1004.06	1153.24	1210.11	1160.96	937.988	884.69	901.851	989.708	1206.03	1556.39		626.86	721.909	850.043	747.249	568.625	437.114	532.534	540.72	808.114	1098.95		677.235	143.409	709.188	252.946
54	951.914	1067.42	1262.29	1185.86	931.64	870.169	898.725	924.222	1284.25	1605.13		574.715	636.091	902.22	772.145	562.277	422.593	529.408	475.234	886.333	1147.68		690.991	186.395	690.749	290.153
55	1016.32	1063.35			984.655	888.139	810.723	960.88	1228.92	1606.02		639.124	632.016			615.292	440.563	441.406	511.892	831.009	1148.57
56	1035.02	1115			968.342	922.197	840.248	1064.77	1135.47	1519.07		657.823	683.666			598.979	474.621	470.931	615.786	737.553	1061.62
57	1066.67	1153.19			1039.25	1002.44	887.757	958.307	1179.65	1403.51		689.467	721.856			669.883	554.865	518.44	509.319	781.733	946.064
58	1095.6	1244.45			960.522	1013.7	825.832	963.379	1055.55	1343.92		718.405	813.114			591.159	566.122	456.515	514.391	657.639	886.471
59	1019.94	1349.26			922.455	1049.52	882.667	969.846	988.258	1299.02		642.738	917.921			553.092	601.947	513.35	520.858	590.344	841.57
60	1010.31	1363.62			1009.96	1015.12	825.272	1059.29	1143.91	1276.17		633.114	932.281			640.596	567.545	455.955	610.301	745.993	818.722
61	1126.14	1326.66			1027.34	1021.9	789.993	1010.34				748.945	895.329			657.979	574.324	420.676	561.35
62					1000.61	1049.44	810.628	1009.6								631.25	601.861	441.311	560.614
63					1006.66	1024.88	824.574	1027.94								637.301	577.305	455.257	578.949
							852.031	918.808										482.714	469.82
							830.686	909.792										461.369	460.804
							886.927	910.968										517.61	461.98

## Sheet: Auxin
Pixel	191030_PKC3AID_P6mCh_L3_A_8_w1SpinningDisc - Green	191030_PKC3AID_P6mCh_L3_A_8_w2SpinningDisc - Red	191030_PKC3AID_P6mCh_L3_A_7_w1SpinningDisc - Green	191030_PKC3AID_P6mCh_L3_A_7_w2SpinningDisc - Red	191030_PKC3AID_P6mCh_L3_A_6_w1SpinningDisc - Green	191030_PKC3AID_P6mCh_L3_A_6_w2SpinningDisc - Red	191030_PKC3AID_P6mCh_L3_A_5_w1SpinningDisc - Green	191030_PKC3AID_P6mCh_L3_A_5_w2SpinningDisc - Red	191030_PKC3AID_P6mCh_L3_A_4_w1SpinningDisc - Green	191030_PKC3AID_P6mCh_L3_A_4_w2SpinningDisc - Red		191030_PKC3AID_P6mCh_L3_A_8_w1SpinningDisc - Green	191030_PKC3AID_P6mCh_L3_A_8_w2SpinningDisc - Red	191030_PKC3AID_P6mCh_L3_A_7_w1SpinningDisc - Green	191030_PKC3AID_P6mCh_L3_A_7_w2SpinningDisc - Red	191030_PKC3AID_P6mCh_L3_A_6_w1SpinningDisc - Green	191030_PKC3AID_P6mCh_L3_A_6_w2SpinningDisc - Red	191030_PKC3AID_P6mCh_L3_A_5_w1SpinningDisc - Green	191030_PKC3AID_P6mCh_L3_A_5_w2SpinningDisc - Red	191030_PKC3AID_P6mCh_L3_A_4_w1SpinningDisc - Green	191030_PKC3AID_P6mCh_L3_A_4_w2SpinningDisc - Red
0	670.062	867.641			655.612	940.197						295.807	412.61			284.186	493.766
1	609.725	782.973			627.901	948.685						235.47	327.942			256.475	502.254
2	622.172	782.604			634.57	922.929						247.917	327.573			263.144	476.498
3	629.489	828.894			642.846	1027.98						255.234	373.863			271.42	581.548
4	589.375	870.018	634.435	860.727	629.446	1012.52	654.737	757.032				215.12	414.987	286.759	446.98	258.02	566.089	299.897	312.41
5	627.927	921.131	651.184	890.4	580.629	1050.97	626.631	767.131				253.672	466.1	303.508	476.653	209.203	604.536	271.791	322.509
6	570.903	819.54	656.855	845.76	630.459	1036.68	596.873	762.216				196.648	364.509	309.179	432.013	259.033	590.254	242.033	317.594
7	596.689	840.647	621.528	842.77	615.856	1052.17	598.952	807.4	639.777	847.549		222.434	385.616	273.852	429.023	244.43	605.743	244.112	362.778	293.718	443.922
8	580.539	855.469	618.149	836.974	623.783	932.572	586.671	811.848	602.844	883.288		206.284	400.438	270.473	423.227	252.357	486.141	231.831	367.226	256.785	479.661
9	578.928	797.838	603.345	807.006	548.955	833.232	594.773	784.856	550.443	805.878		204.673	342.807	255.669	393.259	177.529	386.801	239.933	340.234	204.384	402.251
10	575.18	802.161	628.234	846.711	572.155	937.256	565.612	764.119	602.161	856.465		200.925	347.13	280.558	432.964	200.729	490.825	210.772	319.497	256.102	452.838		PKC-3 AID		PAR-6 mCh
11	579.953	770.083	611.596	864.997	604.574	948.404	584.019	790.985	613.41	858.486		205.698	315.052	263.92	451.25	233.148	501.973	229.179	346.363	267.351	454.859		Average	Stdev	Average	Stdev
12	611.23	801.164	569.828	919.899	609.897	926.099	539.936	781.375	611.775	895.032		236.975	346.133	222.152	506.152	238.471	479.668	185.096	336.753	265.716	491.405		229.682	29.4682	432.022	83.2839
13	674.962	808.21	599.01	846.632	626.891	912.787	556.208	813.46	615.218	944.344		300.707	353.179	251.334	432.885	255.465	466.356	201.368	368.838	269.159	540.717		255.607	35.9785	432.395	76.1609
14	643.268	795.492	554.713	887.492	647.251	853.977	566.149	785.887	586.002	882.799		269.013	340.461	207.037	473.745	275.825	407.546	211.309	341.265	239.943	479.172		240.625	31.7528	408.438	67.8273
15	614.367	819.952	562.033	921.509	617.555	888.671	535.719	735.586	609.447	867.236		240.112	364.921	214.357	507.762	246.129	442.24	180.879	290.964	263.388	463.609		228.973	32.1304	413.899	86.018
16	628.293	835.625	538.568	859.032	617.862	994.097	546.206	713.164	644.913	844.739		254.038	380.594	190.892	445.285	246.436	547.666	191.366	268.542	298.854	441.112		236.317	45.8566	416.64	102.249
17	650.561	773.157	586.935	875.903	635.31	915.357	536.663	772.047	597.857	876.917		276.306	318.126	239.259	462.156	263.884	468.926	181.823	327.425	251.798	473.29		242.614	36.6698	409.985	79.7772
18	651.073	765.958	585.917	883.842	616.954	963.48	541.562	819.385	614.435	851.136		276.818	310.927	238.241	470.095	245.528	517.049	186.722	374.763	268.376	447.509		243.137	35.2979	424.069	81.4636
19	558.852	775.661	607.236	830.147	661.32	906.904	519.273	764.649	676.069	929.631		184.597	320.63	259.56	416.4	289.894	460.473	164.433	320.027	330.01	526.004		245.699	69.9844	408.707	89.6091
20	569.949	799.559	614.21	823.608	655.102	864.813	549.096	814.535	716.854	899.508		195.694	344.528	266.534	409.861	283.676	418.382	194.256	369.913	370.795	495.881		262.191	72.9937	407.713	57.6915
21	607.88	851.165	597.559	850.105	602.945	976.476	513.908	839.13	712.572	901.081		233.625	396.134	249.883	436.358	231.519	530.045	159.068	394.508	366.513	497.454		248.122	74.8932	450.9	60.8729
22	620.612	883.532	556.364	877.176	609.615	945.092	544.764	754.444	697.373	903.253		246.357	428.501	208.688	463.429	238.189	498.661	189.924	309.822	351.314	499.626		246.894	62.6196	440.008	78.4599
23	597.153	894.206	577.332	858.171	678.704	865.656	554.606	745.665	652.25	958.878		222.898	439.175	229.656	444.424	307.278	419.225	199.766	301.043	306.191	555.251		253.158	50.1503	431.824	90.4287
24	604.156	810.875	591.231	860.787	658.963	908.333	537.568	788.404	687.229	1009.13		229.901	355.844	243.555	447.04	287.537	461.902	182.728	343.782	341.17	605.499		256.978	60.1011	442.813	105.142
25	568.505	788.317	604.051	873.563	608.52	906.262	567.818	797.498	636.43	987.907		194.25	333.286	256.375	459.816	237.094	459.831	212.978	352.876	290.371	584.28		238.214	37.4871	438.018	100.699
26	598.622	840.052	600.436	836.97	716.768	913.739	570.92	759.649	623.838	972.889		224.367	385.021	252.76	423.223	345.342	467.308	216.08	315.027	277.779	569.262		263.266	51.9546	431.968	94.9398
27	577.555	853.861	599.841	847.31	688.459	938.566	604.805	800.777	593.542	951.616		203.3	398.83	252.165	433.563	317.033	492.135	249.965	356.155	247.483	547.989		253.989	40.6379	445.734	75.7985
28	620.388	899.616	602.534	840.654	651.711	878.071	592.056	833.023	590.156	946.498		246.133	444.585	254.858	426.907	280.285	431.64	237.216	388.401	244.097	542.871		252.518	16.7505	446.881	57.5989
29	588.141	797.187	591.633	827.836	626.75	920.492	562.492	834.77	603.346	962.102		213.886	342.156	243.957	414.089	255.324	474.061	207.652	390.148	257.287	558.475		235.621	23.3548	435.786	83.4232
30	632.213	797.646	619.554	890.565	624.935	889.513	602.898	793.968	591.346	944.515		257.958	342.615	271.878	476.818	253.509	443.082	248.058	349.346	245.287	540.888		255.338	10.4619	430.55	84.8512
31	641.276	783.557	595.659	886.879	642.207	955.353	578.765	824.788	602.045	902.06		267.021	328.526	247.983	473.132	270.781	508.922	223.925	380.166	255.986	498.433		253.139	18.6554	437.836	79.4442
32	603.95	804.745	617.237	851.214	626.821	902.932	551.823	786.938	570.166	896.542		229.695	349.714	269.561	437.467	255.395	456.501	196.983	342.316	224.107	492.915		235.148	28.2949	415.783	66.7832
33	617.356	853.925	605.348	907.883	616.896	841.408	556.874	809.426	612.322	920.562		243.101	398.894	257.672	494.136	245.47	394.977	202.034	364.804	266.263	516.935		242.908	24.7018	433.949	67.1525
34	590.465	886.862	585.819	970.805	626.144	897.65	575.322	902.118	597.07	939.1		216.21	431.831	238.143	557.058	254.718	451.219	220.482	457.496	251.011	535.473		236.113	17.4117	486.615	55.7929
35	642.572	880.571	595.671	942.829	600.848	886.843	586.679	836.436	637.798	963.988		268.317	425.54	247.995	529.082	229.422	440.412	231.839	391.814	291.739	560.361		253.862	26.2696	469.442	71.7973
36	626.021	888.789	609.467	902.8	613.794	985.417	582.247	976.48	653.106	976.542		251.766	433.758	261.791	489.053	242.368	538.986	227.407	531.858	307.047	572.915		258.076	30.1625	513.314	53.556
37	667.893	895.823	607.059	900.115	660.219	942.09	585.83	881.579	628.799	964.057		293.638	440.792	259.383	486.368	288.793	495.659	230.99	436.957	282.74	560.43		271.109	25.9932	484.041	50.1574
38	611.168	888.44	652.979	885.832	617.556	1030.37	555.619	845.263	629.388	995.378		236.913	433.409	305.303	472.085	246.13	583.936	200.779	400.641	283.329	591.751		254.491	40.8576	496.364	87.2972
39	607.886	828.319	616.323	999.168	623.833	1010.36	551.428	933.722	586.138	1024.64		233.631	373.288	268.647	585.421	252.407	563.928	196.588	489.1	240.079	621.011		238.27	26.8552	526.55	98.333
40	601.992	828.242	629.584	884.942	601.944	912.969	593.773	965.497	602.476	1026.26		227.737	373.211	281.908	471.195	230.518	466.538	238.933	520.875	256.417	622.631		247.103	22.4443	490.89	90.9451
41	589.458	852.19	650.984	898.737	666.642	983.584	619.32	916.478	657.161	992.244		215.203	397.159	303.308	484.99	295.216	537.153	264.48	471.856	311.102	588.617		277.862	39.239	495.955	72.0159
42	603.001	962.772	670.255	887.005	630.808	1049.83	653.406	908.755	642.994	1027.03		228.746	507.741	322.579	473.258	259.382	603.401	298.566	464.133	296.935	623.402		281.242	37.0433	534.387	74.2782
43	595.725	966.157	679.354	916.878	627.649	994.666	624.444	945.087	642.578	962.928		221.47	511.126	331.678	503.131	256.223	548.235	269.604	500.465	296.519	559.301		275.099	41.601	524.452	27.3296
44	603.607	972.89	625.128	888.387	734.236	896.543	567.95	923.796	613.796	907.052		229.352	517.859	277.452	474.64	362.81	450.112	213.11	479.174	267.737	503.425		270.092	58.2302	485.042	26.3516
45	653.693	930.534	584.924	879.515	696.613	1022.15	549.828	880.823	621.494	923.455		279.438	475.503	237.248	465.768	325.187	575.724	194.988	436.201	275.435	519.828		262.459	48.9372	494.605	54.3691
46	657.174	934.586	589.773	858.422	667.658	1000.96	576.552	883.872	673.166	885.097		282.919	479.555	242.097	444.675	296.232	554.529	221.712	439.25	327.107	481.47		274.013	42.267	479.896	46.0035
47	653.062	943.81	598.376	872.17	673.417	904.864	591.421	843.842	738.044	897.238		278.807	488.779	250.7	458.423	301.991	458.433	236.581	399.22	391.985	493.611		292.013	61.3348	459.693	37.6052
48	587.337	919.288	610.464	831.655	660.205	934.319	574.364	889.668	721.691	984.273		213.082	464.257	262.788	417.908	288.779	487.888	219.524	445.046	375.632	580.646		271.961	65.8237	479.149	62.2761
49	585.48	903.459	668.78	876.828	602.391	953.406	592.64	872.512	725.566	886.916		211.225	448.428	321.104	463.081	230.965	506.975	237.8	427.89	379.507	483.289		276.12	71.4689	465.933	30.6084
50	591.911	905.957	630.482	886.179	599.408	913.662	579.675	812.465	703.486	893.21		217.656	450.926	282.806	472.432	227.982	467.231	224.835	367.843	357.427	489.583		262.141	59.2536	449.603	47.7409
51	599.416	903.051	677.47	852.524	655.673	852.975	557.396	870.318	712.54	907.073		225.161	448.02	329.794	438.777	284.247	406.544	202.556	425.696	366.481	503.446		281.648	68.8617	444.497	36.4487
52	717.119	952.791	656.715	907.842	597.933	895.56	601.037	805.495	647.669	905.437		342.864	497.76	309.039	494.095	226.507	449.129	246.197	360.873	301.61	501.81		285.243	47.7724	460.733	59.7453
53	579.983	936.034	676.013	917.71	641.941	942.837	595.372	864.618	660.288	926.67		205.728	481.003	328.337	503.963	270.515	496.406	240.532	419.996	314.229	523.043		271.868	50.8465	484.882	39.3014
54	588.452	990.717	683.198	897.289	650.286	898.122	596.935	807.52	688.233	857.886		214.197	535.686	335.522	483.542	278.86	451.691	242.095	362.898	342.174	454.259		282.57	56.3103	457.615	62.8191
55	586.847	969.986	681.37	1017.06	679.381	846.1	579.104	807.093	629.675	886.847		212.592	514.955	333.694	603.315	307.955	399.669	224.264	362.471	283.616	483.22		272.424	52.538	472.726	95.4468
56	613.124	957.885	611.538	964.043	645.83	930.574	571.186	858.715	601.818	882.079		238.869	502.854	263.862	550.296	274.404	484.143	216.346	414.093	255.759	478.452		249.848	22.7884	485.968	49.1148
57	623.931	810.831	614.11	921.974	639.176	899.766	555.137	810.826	613.844	913.32		249.676	355.8	266.434	508.227	267.75	453.335	200.297	366.204	267.785	509.693		250.388	29.0309	438.652	74.5256
58	605.216	890.123	624.364	860.928	716.119	845.205	569.2	824.709	621.352	892.334		230.961	435.092	276.688	447.181	344.693	398.774	214.36	380.087	275.293	488.707		268.399	50.6429	429.968	42.5264
	619.697	917.416	609.581	864.703	679.273	934.305	502.767	858.175	611.72	792.15		245.442	462.385	261.905	450.956	307.847	487.874	147.927	413.553	265.661	388.523		245.756	59.3357	440.658	39.5607
	621.514	961.954	633.687	850.517	699.138	933.049	547.082	807.483	627.701	857.89		247.259	506.923	286.011	436.77	327.712	486.618	192.242	362.861	281.642	454.263		266.973	50.597	449.487	55.6017
	624.391	900.634	642.27	886.719	727.181	924.912	579.722	912.934	586.197	887.97		250.136	445.603	294.594	472.972	355.755	478.481	224.882	468.312	240.138	484.343		273.101	52.9921	469.942	14.8705
	602.471	980.277	611.165	909.265	712.214	903.121	582.161	766.226	615.29	856.894		228.216	525.246	263.489	495.518	340.788	456.69	227.321	321.604	269.231	453.267		265.809	46.1885	450.465	77.9001
	607.711	921.032	544.64	851.549	704.707	930.596	559.105	857.327	640.249	894.368		233.456	466.001	196.964	437.802	333.281	484.165	204.265	412.705	294.19	490.741		252.431	59.2392	458.283	32.7101
	611.839	853.971	589.723	854.771	733.684	887.792	582.009	885.435	655.419	920.364		237.584	398.94	242.047	441.024	362.258	441.361	227.169	440.813	309.36	516.737		275.684	58.2364	447.775	42.6491
	648.178	851.816	610.845	830.196	735.276	892.103	609.425	819.971	645.61	982.345		273.923	396.785	263.169	416.449	363.85	445.672	254.585	375.349	299.551	578.718		291.016	44.0808	442.595	80.379
	639.193	841.112	610.818	878.308	734.415	854.749	601.121	854.311	603.246	872.255		264.938	386.081	263.142	464.561	362.989	408.318	246.281	409.689	257.187	468.628		278.907	47.5649	427.455	36.9653
	625.384	851.289	612	881.972	666.677	891.799	566.05	903.999	591.665	910.062		251.129	396.258	264.324	468.225	295.251	445.368	211.21	459.377	245.606	506.435		253.504	30.4823	455.133	39.9466
	628.99	832.496	638.451	852.379	711.242	931.93	531.718	922.293	595.098	973.566		254.735	377.465	290.775	438.632	339.816	485.499	176.878	477.671	249.039	569.939
	740.171	786.848	636.752	888.161	715.288	886.975	557.276	883.32	596.175	875.341		365.916	331.817	289.076	474.414	343.862	440.544	202.436	438.698	250.116	471.714
	706.869	876.402	626.214	857.367	756.31	877.837	610.273	853.062	617.622	921.886		332.614	421.371	278.538	443.62	384.884	431.406	255.433	408.44	271.563	518.259
	662.191	866.018	617.441	910.803	742.22	947.609	629.736	834.515	597.49	981.903		287.936	410.987	269.765	497.056	370.794	501.178	274.896	389.893	251.431	578.276
	600.516	850.67	671.827	949.435	769.573	930.658	575.721	902.189	574.051	925.269		226.261	395.639	324.151	535.688	398.147	484.227	220.881	457.567	227.992	521.642
	698.571	833.776	653.999	868.502	729.567	998.081	595.449	954.466				324.316	378.745	306.323	454.755	358.141	551.65	240.609	509.844
	668.696	846.76	638.674	852.598	756.498	869.828	588.215	854.691				294.441	391.729	290.998	438.851	385.072	423.397	233.375	410.069
	626.013	777.137	621.264	812.19	701.441	875.741	597.671	871.843				251.758	322.106	273.588	398.443	330.015	429.31	242.831	427.221
	602.241	834.171			766.186	975.393						227.986	379.14			394.76	528.962
	634.769	911.422			820.589	972.745						260.514	456.391			449.163	526.314
	589.572	968.599			712.482	888.585						215.317	513.568			341.056	442.154
	576.99	1056.11			625.354	912.759						202.735	601.083			253.928	466.328
