# Supplementary material for: Epidermal PAR-6 and PKC-3 are essential for larval development of C. elegans and organize non-centrosomal microtubules
Source: eLife journal article supplement (doi:10.7554/elife.62067), 2020-12-10
Supplement: fig4-figsupp2-data1 [file 201027_PAR-6_levels_upon_PKC-3_deg.xlsx]

## Sheet: Control PAR-6
Worm	201027_PKC3aid_P6mch_pelt2_C_9								Average	Average - bckgrnd	St dev		201027_PKC3aid_P6mch_pelt2_C_6								Average	Average - bckgrnd	St dev		201027_PKC3aid_P6mch_pelt2_C_3								Average	Average - bckgrnd	St dev		201027_PKC3aid_P6mch_pelt2_C_8								Average	Average - bckgrnd	St dev		201027_PKC3aid_P6mch_pelt2_C_1_top
Profile	1	2	3	4	5	6	7	8					1	2	3	4	5	6	7	8					1	2	3	4	5	6	7	8					1	2	3	4	5	6	7	8					1
		845.658														735.475	723.299														677.204							744.958											735.373
		843.879														749.827	713.143			689.264											671.402						801.602	763.486	786.548			749.95							717.649
	808.975	857.186											845.685	766.439	734.197	755.245	712.294	728.609	706.705	671.745	740.115	316.614	51.8225							679.978	670.675	650.29					779.696	746.941	808.045	719.967		756.884	796.057						755.068
	777.936	856.883											849.214	764.66	747.532	747.852	723.671	746.698	711.358	665.446	744.554	321.053	52.3429							696.841	679.736	654.9					777.871	751.147	801.559	725.148	769.896	783.598	804.712	760.57	771.813	330.859	26.3968		750.78
	775.657	829.898											860.383	808.957	795.157	733.332	692.341	723.366	705.232	669.407	748.522	325.021	66.0013							679.945	696.862	649.183					789.428	777.133	809.121	729.636	755.333	746.868	830.324	744.061	772.738	331.784	35.0308		738.203
	801.742	842.61	767.968	760.031			713.941	796.177					852.571	807.793	787.891	727.921	694.539	724.482	717.213	700.287	751.587	328.086	57.3677							691.254	686.188	650.595					756.307	757.565	800.267	751.766	732.989	760.915	831.611	769.841	770.158	329.204	31.2565		725.258
	833.666	836.893	771.463	757.153		734.482	721.887	792.46					852.854	794.687	789.37	746.721	711.25	741.089	721.175	692.065	756.151	332.65	52.918							681.45	687.395	656.533					796.796	759.014	798.846	735.373	692.457	755.696	839.771	764.442	767.799	326.845	44.6374		746.591
	840.006	882.878	784.389	796.239		700.862	712.276	800.113					880.819	792.718	789.233	751.032	730.832	744.041	700.13	688.025	759.604	336.103	61.4953							712.132	699.408	641.847					785.065	778.646	811.183	763.689	731.692	799.523	875.019	807.879	794.087	353.133	41.7459		743.207
	857.474	861.533	758.863	778.359	782.927	718.821	718.484	837.388	789.231	371.163	57.6277		868.229	788.764	776.563	780.116	725.481	731.985	695.332	711.316	759.723	336.222	55.7389							706.401	690.954	657.039					791.308	761.177	794.459	777.63	725.32	806.401	860.158	789.854	788.288	347.334	38.4645		720.737
	809.995	893.559	778.491	785.112	792.674	729.167	704.242	831.227	790.558	372.49	58.6028		859.68	814.82	795.68	771.154	721.013	746.854	743.178	684.057	767.054	343.553	55.6569							695.599	688.061	666.016					801.98	750.014	813.655	721.295	734.247	806.451	884	806.257	789.737	348.783	52.7814		727.622
	805.175	873.43	806.428	791.42	751.208	737.166	724.081	844.759	791.708	373.64	52.2077		837.802	788.109	798.051	774.954	751.686	766.495	719.26	684.94	765.162	341.661	47.3688							699.594	677.61	656.863					804.56	800.421	839.383	741.284	724.837	803.26	899.275	807.839	802.607	361.653	54.172		708.031
	827.813	857.935	781.05	791.071	774.741	718.772	713.987	842.612	788.498	370.43	53.3994		821.289	822.456	797.371	771.756	771.599	779.3	719.894	668.202	768.983	345.482	52.2202		790.949	804.239	811.872	831.945	674.544	678.143	684.225	660.188	742.013	297.915	73.5829		805.697	782.368	824.108	779.045	779.276	841.368	899.582	783.064	811.814	370.86	42.4119		703.985
	831.356	817.416	781.466	795.728	777.765	763.539	719.387	805.522	786.522	368.454	34.9446		843.02	813.672	782.501	777.029	772.289	763.469	709.922	666.142	766.005	342.505	55.7558		757.648	809.369	817.047	815.27	697.2	677.302	695.148	662.901	741.486	297.388	65.9291		815.37	822.744	815.456	766.911	753.928	870.765	897.099	779.595	815.234	374.28	49.5778		721.527
	807.825	825.829	765.575	802.597	745.627	736.245	726.321	799.838	776.232	358.164	37.5131		849.73	832.157	828.004	775.284	778.279	764.016	717.13	656.94	775.193	351.692	64.4529		768.41	768.963	816.946	842.848	710.7	685.421	700.674	661.095	744.382	300.284	65.0282		809.025	821.016	787.636	781.892	776.887	893.259	868.766	793.058	816.442	375.488	42.8444		740.073
	816.682	809.424	767.321	808.665	735.465	751.369	729.91	836.299	781.892	363.824	40.7901		841.207	841.007	853.593	808.221	770.462	771.659	693.328	667.529	780.876	357.375	69.6898		739.142	766.167	802.569	835.746	704.929	690.097	728.262	670.639	742.194	298.096	56.5662		793.475	782.99	793.42	749.147	770.095	878.087	909.839	811.543	811.074	370.12	54.9933		757.598
	810.227	802.374	792.085	820.099	770.595	758.022	679.369	823.062	781.979	363.911	47.3427		838.605	821.877	852.356	799.516	779.213	739.961	713.501	698.334	780.42	356.919	57.9387		745.153	763.709	780.451	831.859	700.856	707.715	715.867	683.746	741.17	297.072	49.2422		776.93	790.429	783.988	789.675	785.208	906.804	882.201	798.28	814.189	373.235	50.3729		701.592
	796.349	797.948	777.809	815.353	766.744	787.571	714.268	795.304	781.418	363.35	30.743		824.492	844.468	858.958	781.781	780.994	777.144	707.607	689.792	783.155	359.654	60.5699		767.779	772.148	789.134	833.509	727.206	734.982	706.007	699.803	753.821	309.723	45.3483		797.102	794.025	782.202	765.479	790.662	917.935	869.388	790.945	813.467	372.513	52.0908		737.145
	820.184	796.348	769.142	815.408	759.008	808.422	727.571	798.654	786.842	368.774	32.1256		840.135	840.794	857.771	781.187	806.506	761.316	738.581	687.775	789.258	365.757	58.4915		762.017	790.192	799.499	811.589	705.989	739.538	722.066	694.26	753.144	309.046	44.4936		791.47	808.498	785.797	776.823	818.783	912.693	840.767	802.436	817.158	376.204	43.5053		765.038
	828.688	797.08	765.109	843.6	749.964	770.917	753.609	812.212	790.147	372.079	35.5044		864.445	820.376	839.225	781.33	780.383	747.401	771.413	704.754	788.666	365.165	51.3647		731.124	769.169	788.986	792.287	707.821	728.057	729.991	723.84	746.409	302.311	32.2357		799.494	820.456	782.479	764.216	832.268	907.234	822.672	797.754	815.822	374.868	43.1989		752.591
	833.58	796.182	798.664	838.409	764.372	784.469	767.857	829.927	801.683	383.615	29.3646		860.612	841.448	862.931	780.723	788.701	759.732	737.507	717.58	793.654	370.153	55.8686		708.042	759.706	781.63	800.032	717.141	726.74	735.769	706.237	741.912	297.814	34.9969		813.781	808.833	761.071	792.059	824.961	880.127	809.513	814.973	813.165	372.211	33.4195		751.095
	828.282	806.188	796.278	859.67	778.74	780.295	744.163	850.786	805.55	387.482	39.1031		848.21	853.844	845.573	815.092	803.946	766.646	757.992	725.512	802.102	378.601	47.7103		699.951	746.505	788.917	775.452	715.904	708.065	707.92	682.391	728.138	284.04	38.0201		799.426	811.792	761.396	776.218	815.933	875.992	827.07	799.592	808.427	367.473	34.6176		714.629
	830.808	819.099	765.365	846.765	803.847	775.224	761.185	838.317	805.076	387.008	34.0121		883.118	860.209	835.691	811.825	820.919	772.824	754.653	724.531	807.971	384.47	53.9406		724.076	794.184	817.146	765.227	713.078	737.691	716.513	697.665	745.697	301.599	42.4124		788.975	804.659	776.307	784.927	843.711	851.053	830.524	813.326	811.685	370.731	27.9433		713.773
	828.017	819.466	778.487	850.349	798.733	763.416	749.887	849.394	804.719	386.651	38.312		888.677	889.589	834.404	835.674	818.128	762.853	730.314	724.109	810.469	386.968	65.2396		757.196	778.129	804.374	799.957	730.563	732.83	746.443	684.963	754.307	310.209	39.7527		806.672	806.607	795.209	777.204	835.975	858.307	803.39	776.528	807.487	366.533	27.874		708.977
	855.711	847.281	804.426	830.852	788.447	768.057	777.762	858.682	816.402	398.334	36.3521		880.521	914.833	837.712	829.385	824.636	753.599	749.881	711.43	812.75	389.249	69.4592		749.623	761.185	790.812	789.05	729.02	747.261	755.211	701.051	752.902	308.804	29.5665		797.412	821.116	781.15	777.511	820.706	873.718	820.918	820.287	814.102	373.148	30.3194		729.484
	865.813	876.257	807.262	856.827	779.701	790.17	783.52	830.569	823.765	405.697	38.9599		881.234	906.418	851.152	844.625	847.701	760.411	749.871	709.511	818.865	395.364	69.9268		740.503	788.601	764.464	793.51	718.451	726.393	736.568	727.451	749.493	305.395	29.0861		783.097	810.994	798.883	770.307	863.537	834.545	831.887	839.333	816.573	375.619	31.3651		715.497
	859.913	914.062	825.424	880.812	797.365	801.747	765.838	849.981	836.893	418.825	48.6433		886.304	900.524	854.235	871.49	826.352	797.171	747.794	727.001	826.359	402.858	64.1473		738.815	798.36	795.419	775.922	723.289	738.236	731.164	704.273	750.685	306.587	34.8312		772.866	786.693	772.242	791.806	834.095	847.791	817.326	797.793	802.577	361.623	27.9013		747.745
	872.518	882.327	808.774	877.147	814.772	794.359	797.766	827.795	834.432	416.364	37.0486		894.872	902.31	862.924	851.995	831.996	800.499	765.525	725.942	829.508	406.007	61.9474		746.076	800.293	805.334	760.358	735.776	752.132	754.481	713.236	758.461	314.363	30.9834		775.188	805.61	787.113	813.263	831.352	847.852	842.563	812.127	814.383	373.429	25.5383		744.397
	846.195	884.06	860.707	881.714	803.814	777.853	805.99	848.339	838.584	420.516	38.7858		902.544	892.126	871.182	875.892	819.438	800.027	783.924	736.678	835.226	411.725	59.2184		763.06	772.552	816.246	788.809	724.439	732.161	743.057	726.426	758.344	314.246	32.9337		790.487	834.261	799.244	825.568	813.336	821.659	825.808	812.442	815.351	374.397	14.6448		752.527
	889.487	918.964	830.51	884.107	833.048	765.243	786.175	870.276	847.226	429.158	53.1208		911.656	909.318	871.432	896.248	835.073	789.812	778.137	748.744	842.552	419.051	64.0726		740.687	771.007	807.501	797.5	751.583	767.428	765.336	756.186	769.654	325.555	22.6156		800.95	822.15	767.774	830.867	795.948	837.468	830.599	824.607	813.795	372.841	23.6715		782.917
	890.492	942.442	869.347	878.395	810.431	809.7	818.447	879.198	862.307	444.239	46.5864		952.153	923.706	889.571	886.909	872.117	799.817	805.676	738.538	858.561	435.06	71.3197		762.8	789.256	799.865	790.368	744.561	747.885	750.897	752.192	767.228	323.13	22.3166		808.746	832.158	805.642	818.644	807.983	804.103	844.754	813.803	816.979	376.025	14.4308		767.426
	907.363	927.031	836.055	879.935	814.185	827.576	806.611	885.398	860.519	442.451	45.2782		926.801	921.883	892.834	908.887	886.474	823.179	786.414	749.616	862.011	438.51	66.9581		743.718	733.132	792.974	805.923	719.008	739.537	732.361	738.403	750.632	306.534	31.1919		805.413	805.148	802.172	806.564	793.993	808.513	838.335	816.377	809.564	368.61	13.1916		751.703
	951.555	977.258	823.258	877.526	813.309	856.891	821.516	881.313	875.328	457.26	60.985		906.226	919.055	889.096	915.85	847.514	794.145	804.906	768.185	855.622	432.121	60.2316		744.877	759.464	776.65	814.559	729.459	772.744	758.68	722.53	759.87	315.772	29.2371		774.965	818.366	803.923	835.193	795.891	822.61	800.837	838.218	811.25	370.296	21.3637		766.573
	978.039	989.322	899.78	880.51	833.292	833.445	850.336	938.845	900.446	482.378	62.452		926.065	936.596	898.994	926.737	868.925	827.365	795.33	769.438	868.681	445.18	64.5106		751.984	744.212	784.693	810.282	729.158	767.488	759.699	733.1	760.077	315.979	27.2095		806.847	785.678	784.023	833.723	787.234	803.01	864.198	853.286	814.75	373.796	31.7059		789.365
	1010.09	988.339	944.538	967.753	879.264	843.417	865.087	963.073	932.695	514.627	61.8453		929.806	937.571	875.026	911.42	859.069	841.879	805.767	784.009	868.068	444.567	56.4222		763.13	754.871	797.304	831.081	762.055	745.901	768.529	752.84	771.964	327.866	28.4408		810.581	805.551	811.284	818.96	807.753	804.974	849.212	825.213	816.691	375.737	14.848		785.378
	1103.45	1078.8	1000.85	1020.46	939.741	870.231	905.186	1034.69	994.174	576.106	82.568		971.064	974.039	936.682	950.909	886.699	850.327	823.194	814.881	900.974	477.473	65.7379		789.745	789.238	816.553	865.633	770.027	749.755	754.308	727.844	782.888	338.79	43.3874		800.494	822.735	787.216	846.583	785.82	828.323	832.489	838.164	817.728	376.774	23.4568		761.657
	1233.39	1194.5	1075.85	1161.94	1023.68	960.259	1002	1153.83	1100.68	682.614	99.2791		967.086	981.241	941.06	960.082	904.425	867.742	818.909	833.384	909.241	485.74	63.0043		768.312	781.477	807.873	871.243	746.055	764.244	780.267	722.078	780.194	336.096	44.7153		808.145	820.964	798.436	847.114	808.857	813.146	872.039	876.639	830.668	389.714	30.5157		784.134
	1398.39	1325.75	1223.82	1353.95	1168.05	1045.43	1145.65	1320.89	1247.74	829.673	121.706		1003.8	1039.01	1021.74	1006.27	975.797	915.545	856.349	866.892	960.675	537.174	71.4627		747.958	783.645	802.256	848.921	737.833	774.707	774.565	761.893	778.972	334.874	34.7243		812.097	850.39	817.793	858.953	848.213	853.014	889.834	894.495	853.099	412.145	29.4139		797.281
	1525.59	1488.83	1401.17	1574.14	1339.21	1209.61	1250.78	1497.19	1410.81	992.746	133.474		1068.19	1097.89	1088.09	1054.33	1025.55	952.765	858.97	889.867	1004.46	580.957	92.3421		782.527	786.883	799.945	842.815	756.168	768.828	794.732	753.078	785.622	341.524	28.7329		811.422	864.748	847.11	907.416	864.864	862.095	886.749	919.407	870.476	429.522	34.2084		785.186
	1682.3	1610.36	1553.3	1779.82	1589.07	1430.09	1390.02	1638.98	1584.24	1166.17	127.621		1129.29	1210.2	1212.58	1193.58	1190.66	1047.03	918.237	1051.15	1119.09	695.59	105.538		779.424	772.749	805.972	857.755	781.316	765.717	811.295	751.708	790.742	346.644	33.4573		845.017	893.248	883.621	867.853	872.583	876.451	883.1	952.725	884.325	443.371	31.1138		788.365
	1716.68	1683.69	1711.1	1866.93	1641.65	1609.11	1413.69	1659.79	1662.83	1244.76	126.907		1432.58	1373.31	1462.87	1361.61	1350.84	1145.01	1071.69	1233.86	1303.97	880.469	139.516		774.048	772.687	844.743	892.222	773.478	755.761	833.449	753.71	800.012	355.914	50.4953		888.493	943.357	920.788	931.924	947.248	869.609	942.614	1011.37	931.925	490.971	42.5688		771.321
	1603.04	1649.51	1652.93	1737.46	1584.72	1605.37	1276.59	1552.24	1582.73	1164.66	135.706		1706.62	1602.85	1689.75	1542.74	1580.29	1374.01	1203.84	1449.07	1518.65	1095.14	169.429		792.527	787.958	834.654	899.647	803.748	755.558	829.397	776.398	809.986	365.888	44.6317		959.344	997.628	986.523	1068.65	987.314	923.019	1007.7	1101.69	1003.98	563.03	57.2145		772.882
	1363.59	1446.11	1503.4	1510.86	1405.78	1560.29	1144.74	1384.62	1414.92	996.854	128.601		1887.88	1865.77	1892.02	1717.33	1648.73	1482.46	1375.24	1614.23	1685.46	1261.96	193.11		801.12	765.144	833.149	925.098	808.005	773.75	810.214	775.141	811.453	367.355	51.2566		1083.89	1095.46	1043.13	1221.35	1166.16	1045.32	1184.25	1186.56	1128.26	687.311	69.4952		794.676
	1143.07	1236.94	1264.38	1280.65	1254.86	1367.25	1001.13	1149.02	1212.16	794.096	111.614		1854.85	1881.68	1774.69	1671.71	1603.57	1435.24	1417.93	1500.96	1642.58	1219.08	183.445		812.189	767.034	837.318	917.865	827.277	803.137	824.192	776.73	820.718	376.62	46.24		1204.16	1268.06	1226.49	1323.29	1348.56	1233.83	1272.51	1343.98	1277.61	836.656	55.5068		829.535
	1057.52	1060.78	1104.48	1092.61	1066.49	1138.18	922.482	1026.25	1058.6	640.531	64.6278		1749.71	1667.62	1604.69	1519.85	1454.48	1357.45	1349.08	1357.34	1507.53	1084.03	154.399		814.944	795.33	854.995	902.8	832.841	796.306	850.101	779.253	828.321	384.223	40.45		1366.73	1453.51	1365.71	1432.07	1513.62	1389.56	1391.94	1446.12	1419.91	978.954	51.0108		817.126
	979.883	1012.67	969.597	1026.03	989.129	991.909	845.788	955.725	971.341	553.273	55.4483		1523.9	1447.94	1407.32	1363.12	1312.99	1235.09	1223.06	1211.36	1340.6	917.096	114.949		843.008	812.694	842.416	896.689	823.482	778.175	842.904	770.169	826.192	382.094	40.4066		1493.61	1497.51	1440.76	1520.88	1478.41	1414.51	1435.31	1489.23	1471.28	1030.32	36.7772		786.493
	951.018	950.905	930.945	970.633	913.209	893.116	809.683	929.607	918.639	500.572	50.1668		1357.86	1303.87	1251.61	1228.54	1164.59	1127.56	1152.12	1134.46	1215.08	791.576	84.9016		816.664	827.062	839.019	882.208	821.129	800.498	836.941	789.996	826.69	382.592	28.0392		1433.83	1542.61	1418.99	1504.08	1452.23	1439.59	1426.07	1433.79	1456.4	1015.45	43.6653		797.62
	947.211	865.642	922.498	920.097	856.235	845.292	789.122	937.703	885.475	467.407	55.1043		1189.41	1163.12	1139.71	1093.54	1069.87	1072.91	1046.13	987.78	1095.31	671.807	66.0712		808.227	814.071	847.465	867.546	823.459	803.031	836.026	800.954	825.097	380.999	23.6049		1317.49	1482.24	1421.95	1388.94	1345.88	1351.78	1357.93	1377.86	1380.51	939.554	51.6171		801.394
	907.806	869.53	874.969	849.376	857.391	817.441	766.614	889.88	854.126	436.058	44.5116		1084.8	1058.84	1045.52	1042.28	1002.43	988.234	952.689	924.653	1012.43	588.931	55.2099		801.146	796.286	889.736	880.968	824.261	821.492	834.239	809.365	832.187	388.089	35.1449		1264.04	1382.41	1355.27	1313.56	1245.48	1263.84	1314.47	1299.05	1304.76	863.811	47.2589		784.188
	894.165	879.867	879.367	841.914	840.61	796.939	733.474	882.53	843.608	425.54	54.751		1042.56	991.189	971.138	986.799	914.947	925.969	881.154	865.617	947.421	523.92	60.5654		791.656	822.137	871.296	874.479	825.895	817.214	821.966	810.107	829.344	385.246	28.9161		1176.18	1268.26	1258.42	1208.39	1150.1	1170.08	1242.32	1232.3	1213.25	772.301	43.9536		785.52
	858.046	834.831	862.772	846.929	813.951	783.016	733.712	889.763	827.877	409.809	49.9178		982.381	974.018	956.596	945.515	904.737	885.339	859.961	825.215	916.72	493.219	56.9922		792.243	815.444	866.882	861.598	829.803	820.487	821.097	806.346	826.737	382.639	25.747		1090.38	1141.5	1193.92	1097.56	1085.58	1124.58	1141.06	1119	1124.2	683.242	35.4914		784.34
	887.267	851.125	845.706	830.685	811.202	750.343	718.032	855.066	818.678	400.61	57.0854		956.04	960.13	957.54	896.812	898.825	823.716	838.374	810.193	892.704	469.203	62.4899		801.787	811.142	856.609	870.883	834.316	823.828	838.892	821.98	832.43	388.332	22.9407		971.78	1103.97	1110.37	1060.96	1018.66	1024.11	1081.2	1061.92	1054.12	613.168	46.9464		781.489
	905.222	838.951	834.992		786.947	758.903	722.86	862.91	815.826	397.758	63.0179		941.91	917.651	899.703	897.928	898.958	807.464	801.505	780.946	868.258	444.757	61.4714		814.853	832.134	859.057	899.572	821.269	853.843	859.756	800.895	842.672	398.574	31.6478		938.655	1023.04	1039.53	985.864	962.739	998.703	1033.28	1000.13	997.743	556.789	34.8745		832.879
	902.788	851.879	823.519		779.041	757.811		874.372					941.046	947.438	902.212	908.851	875.725	857.593	814.39	804.931	881.523	458.022	53.5084		847.24	863.022	875.471	843.098	840.251	851.691	835.684	797.255	844.214	400.116	22.9617		883.178	956.463	981.306	939.804	898.97	947.816	946.201	936.432	936.271	495.317	31.3745		856.664
					795.107								924.857	962.124	937.118	930.846	889.714	842.406	809.615	814.933	888.952	465.451	59.3521		846.773	879.885	913.833	866.374	847.239	842.928	858.079	827.344	860.307	416.209	26.8132		869.984	919.359	935.377	930.522	880.69	885.983	905.253	877.099	900.533	459.579	25.5734		932.294
													900.345	926.719	931.622	856.932	860.168	814.419	808.781	807.283	863.284	439.783	51.5643		856.916	899.77	942.025	887.063	865.008	840.024	874.557	820.721	873.261	429.163	37.462		867.364	871.168	884.006	887.888	858.356	853.595	863.13	859.426	868.117	427.163	12.3045		978.179
													923.765	894.51	897.032	938.286	859.666	839.63	806.932	828.476	873.537	450.036	47.0804		862.405	887.122	935.883	907.53	871.67	864.099	867.407	850.988	880.888	436.79	28.1763		841.905	832.506	856.768	863.981	858.095	844.462	863.084	885.46	855.783	414.829	16.3451		1041.01
														894.157	922.088										885.729	967.23	970.563	964.327	888.47	903.188	909.4	881.556	921.308	477.21	39.243		848.433	836.45	854.802	845.576	813.468	782.141	831.216	831.394	830.435	389.481	23.3141		1179.58
														900.104	954.609										948.818	991.996	1055.33	987.941	966.911	942.844	980.286	920.227	974.294	530.197	40.9158		823.898	844.443	809.7	822.743	789.29	759.093	806.827	785.436	805.179	364.225	26.6991		1351.93
																									1064.07	1080.51	1165.21	1084.63	1100.85	978.127	1051.54	985.85	1063.85	619.75	60.8694		816.219	835.01	815.354	814.704	789.623	776.986	790.593	772.545	801.379	360.425	22.0554		1427.09
																									1172.76	1240.47	1361.81	1260.8	1254.31	1138.19	1168.69	1078.62	1209.46	765.359	87.8529		795.781	787.266	795.085	821.765	795.052	810.063	765.826	782.727	794.196	353.242	16.9042		1470.54
																									1330.32	1368.26	1531.36	1384.47	1373.85	1277.33	1305.06	1196.11	1345.85	901.747	97.2572		740.362	814.282	822.754	784.727	784.525	782.679	778.365	772.669	785.045	344.091	25.29		1388.97
																									1438.69	1470.02	1628.64	1566.66	1484.06	1464.92	1496.61	1360.36	1488.75	1044.65	80.7382		780.342	787.565	817.91	792.126	790.909	791.001	761.265	781.76	787.86	346.906	15.7728		1275.47
																									1500.27	1507.23	1640.88	1586.98	1490.04	1510.04	1512.92	1424.25	1521.58	1077.48	65.2959		746.372	763.817	781.761	808.703	779.959	783.27	792.602	802.394	782.36	341.406	20.1641		1208.94
																									1453.15	1414.2	1523.27	1474.32	1309.6	1451.59	1389.25	1417.74	1429.14	985.042	63.4882		742.112			796.499	812.066		795.719	765.95					1104.95
																									1376.57	1343.86	1341.75	1292.85	1170.31	1366.01	1266.92	1324.8	1310.38	866.286	67.1942						852.688			803.531					1062.64
																									1196.65	1166.85	1162.12	1144.21	997.251	1157.27	1068.98	1176.54	1133.73	689.636	66.7367														1005.85
																									1049.98	1020.54	1016.96	978.016	917.849	1042.93	944.999	998.759	996.253	552.155	46.5935														997.195
																									922.776	922.381	915.061	929.127	875.625	895.354	875.979	902.072	904.797	460.699	21.0707														929.237
																									866.15	877.219	873.755	885.662	826.753	844.271	801.622	821.995	849.678	405.58	30.5542														920.079
																									820.697	842.353	852.146	820.166	768.056	832.318	787.9	829.27	819.113	375.015	28.014														892.117
																									804.048	814.405	805.191	815.668	781.5	783.808	803.608	766.395	796.828	352.73	17.5766														891.67
																									771.608	782.69	781.127	794.981	779.719	765.724	764.963	766.52	775.917	331.819	10.5672														880.422
																									764.378	779.945	793.629	783.169	773.675	746.225	765.969	740.683	768.459	324.361	18.1177														895.455
																									746.03	786.117	783.451	760.167	780.119	769.588	766.062	741.567	766.638	322.54	16.6819
																									769.354	814.139	802.919	799.557	774.775	766.089	745.271	746.374	777.31	333.212	25.8741
																									786.961	801.458	825.2	785.936	780.748	762.355	738.066	763.634	780.545	336.447	26.5196
																									796.927	813.226	833.057	820.865	761.487	759.439	753.046	772.249	788.787	344.689	31.1904
																									810.415	848.195	829.775	847.883	758.445	751.637		776.217
																														782.939		758.578
[truncated: 29 more columns]

## Sheet: Auxin PAR-6
Worm	201027_PKC3aid_P6mch_pelt2_A_2h_6								Average	Average - bckgrnd	St dev		201027_PKC3aid_P6mch_pelt2_A_2h_3								Average	Average - bckgrnd	St dev		201027_PKC3aid_P6mch_pelt2_A_2h_1								Average	Average - bckgrnd	St dev		201027_PKC3aid_P6mch_pelt2_A_2h_4								Average	Average - bckgrnd	St dev		201027_PKC3aid_P6mch_pelt2_A_2h_2
Profile	1	2	3	4	5	6	7	8					1	2	3	4	5	6	7	8					1	2	3	4	5	6	7	8					1	2	3	4	5	6	7	8					1
								685.848											616.482								786.476				765.054											691.377
								709.367											622.329								787.872				770.136						832.957					688.59
		829.2						698.826						898.887		839.434		707.615	639.002								759.31	800.644	742.858		804.357						839.414					715.381
		863.601					717.328	668.866						878.612	847.297	834.391		734.909	645.164	626.62							765.167	798.05	736.124		784.538						832.146					692.069
		831.831					728.753	658.269					885.212	860.707	835.735	800.86	765.323	725.89	630.253	614.915	764.862	305.512	101.497			775.142	781.507	798.536	762.648	811.974	770.539	797.511					854.103					725.807
	912.843	809.634		740.053			733.148	689.192					852.081	866.452	834.897	771.572	750.371	719.778	632.139	633.846	757.642	298.292	92.1828		673.101	808.858	803.143	745.656	758.801	805.146	772.839	792.543	770.011	341.995	45.4617		843.186					702.224
	900.355	827.293		724.243	810.932	817.488	727.201	704.269					866.664	832.64	829.876	806.667	776.913	694.329	620.845	625.005	756.617	297.267	96.9604		690.85	783.084	776.455	747.793	758.938	765.218	765.297	763.183	756.352	328.336	28.5218		857.589					700.628
	913.753	835.509	864.294	746.24	797.774	814.395	713.074	704.329	798.671	360.042	73.8063		836.438	825.863	828.048	811.292	767.044	711.131	621.16	644.131	755.638	296.288	86.5447		693.845	758.821	766.971	768.909	768.958	784.826	770.284	762.93	759.443	331.427	27.5533		870.062			682.795		732.306	713.215
	912.895	808.438	871.129	768.748	773.266	805.345	720.059	679.177	792.382	353.753	75.7065		878.021	836.072	863.644	809.089	768.111	718.375	629.658	600.655	762.953	303.603	104.865		706.726	760.25	756.882	756.396	728.631	823.981	754.793	789.797	759.682	331.666	35.5621		866.468			726.226		749.059	708.667
	919.129	790.253	851.976	756.545	807.343	816.963	718.78	697.806	794.849	356.22	71.7598		863.448	855.386	845.419	797.546	754.225	717.407	642.026	602.432	759.736	300.386	99.354		676.041	758.778	756.115	764.458	749.426	808.143	778.957	788.245	760.02	332.004	39.0463		847.335	781.593		714.314		736.042	691.237
	904.889	817.161	827.333	726.153	810.456	794.252	732.87	708.279	790.174	351.545	65.2313		870.142	869.264	808.978	786.54	772.229	706.305	645.194	620.139	759.849	300.499	94.8285		705.169	790.571	775.264	753.098	774.501	792.896	763.692	791.531	768.34	340.324	29.1925		886.164	820.153		701.799		717.873	703.831
	896.034	838.256	844.969	730.849	791.975	799.927	727.614	711.724	792.668	354.039	65.6363		873.346	878.07	822.249	787.102	747.866	716.338	622.09	626.206	759.158	299.808	100.261		693.224	796.982	802.735	740.462	753.548	836.734	763.49	769.181	769.544	341.528	43.6416		886.904	809.033	761.417	692.844		740.246	722.096	685.2
	895.796	841.435	851.44	722.504	807.988	791.801	712.303	694.294	789.695	351.066	73.3791		835.273	860.486	834.001	820.362	741.391	724.122	644.849	609.427	758.739	299.389	94.4427		696.171	779.823	773.382	759.842	746.43	788.869	734.469	777.424	757.051	329.035	30.5886		854.792	815.92	773.178	718.82	727.875	730.931	743.835	723.164	761.064	290.664	49.9546		738.617
	875.866	823.931	817.931	732.521	784.444	786.811	706.967	689.13	777.2	338.571	63.7045		900.262	881.678	834.321	828.131	758.41	743.307	638.312	610.81	774.404	315.054	107.126		704.549	747.623	762.975	751.064	776.962	805.989	747.385	791.718	761.033	333.017	31.3415		860.702	794.179	771.311	726.407	725.275	717.498	764.281	725.025	760.585	290.185	49.014		731.174
	886.465	834.998	851.207	753.109	792.763	784.845	715.362	699.644	789.799	351.17	65.6903		877.529	877.955	845.734	801.092	785.036	715.731	639.88	633.106	772.008	312.658	99.0881		709.165	754.734	743.87	744.143	749.067	794.465	765.421	770.137	753.875	325.859	24.6778		877.859	817.138	765.225	720.005	741.934	744.724	723.881	718.944	763.714	293.314	56.3433		757.324
	882.723	859.235	838.94	732.498	787.333	785.891	721.832	677.526	785.747	347.118	71.9814		875.338	899.891	827.003	804.933	759.574	710.065	638.54	642.341	769.711	310.361	99.7971		702.666	743.633	769.918	757.468	783.667	776.745	773.691	753.19	757.622	329.606	25.8815		883.303	805.398	761.9	710.649	745.115	731.453	754.217	711.323	762.92	292.52	57.4145		758.164
	905.101	854.439	835.55	775.652	785.736	813.769	720.397	692.93	797.947	359.318	69.7203		894.524	890.129	869.686	798.127	709.562	724.246	647.154	626.135	769.945	310.595	108.365		685.612	747.545	775.916	745.131	789.132	773.971	744.58	761.374	752.908	324.892	31.7225		916.057	755.448	768.093	726.492	739.221	704.573	751.3	744.988	763.272	292.872	64.6774		765.194
	869.018	810.125	851.332	761.012	809.576	831.037	724.441	711.401	795.993	357.364	57.9489		895.322	877.837	854.407	766.697	742.644	734.513	664.532	620.063	769.502	310.152	100.057		688.471	738.736	751.345	731.612	778.392	804.081	757.62	788.131	754.798	326.782	36.4717		883.775	769.505	785.985	725.083	730.808	750.059	724.483	736.211	763.239	292.839	53.4516		728.517
	882.101	851.159	841.149	776.976	811.791	837.829	750.761	690.562	805.291	366.662	62.4825		888.834	887.342	803.545	808.497	751.387	713.404	647.735	623.831	765.572	306.222	100.146		708.012	761.044	755.168	748.71	780.891	793.335	761.553	756.711	758.178	330.162	25.0399		871.147	791.594	743.138	719.263	722.87	772.506	718.558	729.483	758.57	288.17	52.7299		748.682
	872.035	856.111	839.933	751.785	819.616	805.588	731.64	711.153	798.483	359.854	60.0253		893.187	905.279	807.471	826.513	734.769	733.376	659.297	645.253	775.643	316.293	98.719		721.031	749.451	752.182	755.663	795.963	784.897	767.559	757.789	760.567	332.551	22.9361		903.376	787.352	791.232	733.665	740.356	751.308	708.263	747.576	770.391	299.991	60.2406		765.839
	849.72	870.959	835.362	746.431	817.735	815.801	715.19	710.896	795.262	356.633	62.2715		876.903	881.64	809.444	793.92	730.441	752.989	647.281	638.749	766.421	307.071	92.627		708.306	729.891	749.349	755.607	775.767	824.996	804.756	793.076	767.719	339.703	39.2886		895.724	795.824	770.664	727.231	752.936	741.046	712.141	726.386	765.244	294.844	59.1625		756.716
	874.421	844.196	822.784	766.659	810.379	835.916	728.341	686.178	796.109	357.48	63.796		872.922	885.728	838.904	809.088	757.07	724.062	649.918	627.914	770.701	311.351	97.9382		720.76	732.432	751.073	750.521	822.518	797.092	793.456	783.684	768.942	340.926	35.4445		899.48	789.517	796.029	711.451	745.864	733.857	723.083	737.386	767.083	296.683	61.3388		755.806
	861.28	858.261	858.9	758.797	801.064	839.463	718.735	694.51	798.876	360.247	67.1852		867.185	883.376	839.487	804.774	777.872	744.92	636.718	619.498	771.729	312.379	99.5839		714.113	734.282	752.302	742.277	809.212	786.339	791.816	799.222	766.195	338.179	34.8456		907.874	814.794	802.508	711.689	749.852	742.935	709.214	716.793	769.457	299.057	68.8006		752.362
	843.033	859.709	853.35	753.484	823.297	813.397	727.147	701.595	796.876	358.247	61.0179		860.582	890.239	794.093	813.537	779.464	742.263	634.044	622.921	767.143	307.793	97.1364		731.746	744.598	741.595	746.483	804.215	751.391	783.202	824.496	765.966	337.95	33.8049		903.992	855.143	809.867	737.905	741.885	752.67	701.848	699.656	775.371	304.971	73.9456		773.819
	827.335	839.188	842.177	758.666	829.01	804.203	728.768	710.241	792.448	353.819	52.514		907.075	888.194	791.052	792.477	756.636	746.396	650.523	631.992	770.543	311.193	98.3885		766.917	753.714	751.798	746.183	786.954	759.862	764.578	801.435	766.43	338.414	18.8192		909.213	823.163	807.373	703.851	762.638	754.199	695.322	704.684	770.055	299.655	73.8008		764.814
	843.529	848.936	833.457	766.189	829.099	804.137	714.461	711.759	793.946	355.317	56.3485		904.18	874.102	815.394	795.337	753.344	751.013	648.18	628.617	771.271	311.921	97.8325		742.046	728.88	770.227	737.35	806.134	780.638	799.382	770.989	766.956	338.94	28.6539		897.887	826.749	821.51	682.834	739.502	736.423	705.683	705.288	764.484	294.084	75.5601		730.015
	834.174	855.976	803.928	773.314	841.303	819.589	722.411	699.134	793.729	355.1	57.3184		907.817	884.237	802.091	809.58	757.133	761.739	634.98	648.573	775.769	316.419	98.2581		722.239	730.59	774.552	761.074	800.671	781.945	805.654	785.653	770.297	342.281	30.551		897.439	829.628	811.294	694.527	734.874	718.34	707.311	707.059	762.559	292.159	74.2089		733.73
	856.939	855.461	806.233	779.408	844.267	857.344	713.189	700.168	801.626	362.997	64.9287		896.027	882.353	804.315	798.43	775.561	740.57	643.433	628.802	771.186	311.836	98.077		715.314	737.59	790.505	734.046	802.959	802.119	797.58	751.785	766.487	338.471	35.5885		919.339	822.575	798.741	700.518	746.467	736.663	694.821	695.509	764.329	293.929	78.6754		733.642
	854.893	853.97	848.576	783.444	833.001	837.835	722.737	709.507	805.495	366.866	59.7581		889.143	872.385	833.134	812.822	748.091	721.389	644.192	622.411	767.946	308.596	100.653		750.256	718.624	776.058	773.166	804.064	818.17	773.712	772.725	773.347	345.331	30.4451		902.395	840.26	814.455	694.573	758.47	755.982	727.004	694.766	773.488	303.088	73.554		731.775
	850.004	835.718	866.073	781.204	835.252	833.433	776.614	730.387	813.586	374.957	45.9377		914.158	880.078	840.069	814.323	745.008	721.398	657.747	625.22	774.75	315.4	104.294		749.433	727.291	755.728	764.963	768.195	807.591	777.101	767.71	764.751	336.735	23.0768		917.235	867.238	803.186	726.417	746.257	760.585	707.167	699.349	778.429	308.029	78.5199		720.715
	867.976	850.296	853.89	783.035	826.127	854.357	732.939	738.287	813.363	374.734	54.5851		921.166	937.242	850.067	804.224	746.38	725.885	632.678	656.778	784.303	324.953	113.984		716.29	712.012	788.594	800.107	760.582	787.208	764.819	779.668	763.66	335.644	33.1298		880.561	887.483	821.036	709.463	758.634	769.03	692.609	708.8	778.452	308.052	77.0796		750.767
	864.633	885.858	834.503	780.656	823.597	829.077	730.597	722.71	808.954	370.325	59.3598		921.696	915.139	829.472	807.825	771.244	720.425	658.102	622.528	780.804	321.454	110.09		744.791	731.892	757.007	775.08	786.693	775.478	782.527	781.727	766.899	338.883	20.0305		897.819	874.714	822.652	708.437	764.487	763.261	694.482	707.877	779.216	308.816	78.2154		731.22
	867.111	890.636	834.58	767.874	837.402	810.468	749.184	722.746	810	371.371	58.8042		905.033	884.77	819.437	816.704	744.485	701.416	670.672	632.17	771.836	312.486	100.159		755.257	739.167	753.586	794.707	769.074	780.772	767.669	772.521	766.594	338.578	17.2534		868.573	860.434	807.944	702.476	765.134	799.308	714.126	696.828	776.853	306.453	68.5328		721.999
	856.262	882.568	820.239	799.392	851.505	792.179	760.49	748.387	813.878	375.249	47.4959		941.873	892.517	844.56	808.107	769.229	712.523	682.864	647.825	787.437	328.087	103.478		752.551	746.501	771.533	802.484	770.436	795.238	767.679	787.482	774.238	346.222	19.7075		854.773	829.257	808.369	701.862	760.647	789.631	711.549	708.393	770.56	300.16	59.1548		737.168
	845.861	877.201	857.443	770.258	848.759	803.428	765.308	731.538	812.475	373.846	52.4845		886.27	904.777	825.207	801.12	757.048	753.596	662.617	656.166	780.85	321.5	92.338		734.111	755.094	792.387	789.05	769.599	804.353	799.538	795.279	779.926	351.91	24.7208		882.679	864.995	794.294	693.83	759.439	762.08	704.508	702.191	770.502	300.102	72.872		712.692
	833.529	919.882	858.201	775.755	822.77	830.087	749.435	751.618	817.66	379.031	57.6907		954.021	882.856	863.43	810.48	768.449	741.046	667.804	633.922	790.251	330.901	109.211		744.379	744.7	781.976	822.081	789.078	772.4	795.614	776.698	778.366	350.35	25.8102		888.284	847.538	800.732	689.52	735.927	768.365	725.623	692.118	768.513	298.113	72.3145		704.389
	855.845	874.569	860.572	779.958	824.697	822.032	755.578	750.958	815.526	376.897	48.2481		951.016	895.868	853.623	849.821	783.437	739.851	670.779	649.95	799.293	339.943	107.208		755.54	760.335	787.943	791.117	786.8	790.275	796.454	793.289	782.719	354.703	15.6373		863.896	825.872	817.175	723.289	713.026	771.787	689.312	710.837	764.399	293.999	64.7574		724.535
	879.061	909.042	873.259	806.901	840.931	823.092	760.892	709.219	825.3	386.671	65.9155		939.19	881.401	827.669	844.926	781.669	725.419	672.099	636.004	788.547	329.197	104.803		730.258	748.263	772.142	790.454	780.626	784.395	765.921	782.919	769.372	341.356	20.6169		891.369	834.458	765.319	693.224	752.186	761.894	724.645	700.94	765.504	295.104	67.453		721.96
	874.106	879.337	901.592	849.961	826.961	823.445	783.82	726.679	833.238	394.609	56.9204		957.362	904.365	863.039	847.145	747.062	710.631	688.705	662.248	797.57	338.22	109.515		744.602	748.367	752.662	780.242	786.336	822.356	798.413	782.645	776.953	348.937	27.0106		856.634	830.388	780.993	667.491	751.19	757.969	718.419	688.583	756.458	286.058	65.5766		735.352
	909.069	928.455	877.887	832.144	857.345	828.478	782.591	743.908	844.985	406.356	61.9404		958.35	953.441	862.969	847.871	766.271	724.407	696.954	662.256	809.065	349.715	113.806		737.394	728.785	741.811	777.75	825.289	791.146	781.698	805.436	773.664	345.648	34.6528		885.577	867.698	795.975	725.927	755.401	756.075	699.745	684.664	771.383	300.983	73.8046		730.61
	911.737	939.53	904.296	838.21	872.992	809.626	769.995	748.767	849.394	410.765	69.4044		1005.95	951.259	904.677	850.959	793.206	739.759	696.514	644.837	823.395	364.045	127.014		729.883	744.872	770.284	779.169	825.772	807.59	772.606	783.004	776.647	348.631	30.8703		899.752	850.767	824.981	718.19	770.692	764.707	727.167	701.249	782.188	311.788	70.1707		718.686
	932.95	936.416	929.659	822.468	892.922	815.173	774.471	762.455	858.314	419.685	73.0195		974.159	957.7	876.056	871.883	803.736	733.714	697.288	690.981	825.69	366.34	111.941		752.23	737.098	795.123	788.588	780.01	817.559	811.3	800.895	785.35	357.334	28.0616		852.962	870.119	839.393	705.174	764.938	743.544	766.769	715.339	782.28	311.88	63.7425		732.221
	925.561	951.67	924.305	811.46	910.277	853.176	789.505	765.277	866.404	427.775	71.0947		971.154	940.552	870.598	869.181	762.73	751.993	706.268	688.167	820.08	360.73	107.291		715.032	749.064	757.952	782.453	788.203	797.778	788.583	807.59	773.332	345.316	30.5486		845.512	869.931	849.636	745.772	752.499	737.158	735.623	738.865	784.374	313.974	59.161		729.958
	941.906	974.501	938.763	827.366	927.116	883.736	793.806	762.096	881.161	442.532	77.9561		1006.9	966.37	886.673	841.668	785.967	694.187	706.287	679.147	820.9	361.55	125.938		713.147	738.283	762.364	790.889	761.161	807.309	794.07	794.702	770.241	342.225	32.4963		885.839	881.072	849.975	718.012	757.185	783.045	723.851	714.815	789.224	318.824	73.102		716.51
	961.641	999.531	948.582	873.648	977.691	898.016	811.877	764.378	904.42	465.791	83.4978		999.58	975.785	900.372	859.171	789.025	737.649	719.479	667.157	831.027	371.677	122.326		722.26	737.495	761.159	769.485	764.255	802.928	761.041	798.773	764.675	336.659	27.2885		880.096	845.041	869.38	706.257	792.704	788.841	740.578	707.558	791.307	320.907	69.38		738.291
	921.122	955.999	944.169	853.935	926.338	881.623	788.85	764.301	879.542	440.913	71.8199		954.455	926.965	872.358	844.898	800.75	735.084	685.746	665.392	810.706	351.356	108.034		716.711	734.031	783.979	790.872	781.502	784.286	785.195	803.342	772.49	344.474	30.2228		872.036	868.622	853.424	685.059	767.282	779.441	745.253	718.862	786.247	315.847	71.2384		745.491
	958.952	949.256	920.614	839.891	896.412	883.313	770.133	772.718	873.911	435.282	73.5352		951.039	891.685	837.32	843.316	751.242	710.029	685.554	637.201	788.423	329.073	109.211		750.899	735.567	779.456	816.569	775.455	789.24	767.385	817.237	778.976	350.96	28.7902		895.692	874.544	850.105	722.059	784.283	782.041	728.108	715.515	794.043	323.643	71.6051		755.37
	914.56	951.678	904.68	850.274	897.418	882.231	798.79	754.144	869.222	430.593	65.0699		929.061	892.993	871.229	807.718	764.866	706.704	689.771	636.22	787.32	327.97	105.603		730.155	707.72	770.975	765.316	780.125	785.09	807.197	808.263	769.355	341.339	35.1809		907.792	827.414	839.424	762.971	808.554	770.146	720.205	731.389	795.987	325.587	62.3428		740.168
	861.85	953.291	894.07	836.738	864.519	853.754	777.39	733.32	846.867	408.238	67.5704		935.692	874.227	864.239	808.557	754.709	706.299	674.431	631.224	781.172	321.822	107.151		715.133	739.121	787.831	774.546	796.061	798.253	824.813	812.808	781.071	353.055	37.103		903.196	837.578	859.943	720.931	816.133	792.415	741.681	765.812	804.711	334.311	61.6635		746.753
	888.298	875.114	858.943	813.67	839.641	838.848	768.682	739.074	827.784	389.155	51.6826		874.097	865.978	842.081	796.373	738.547	690.696	667.216	629.718	763.088	303.738	94.9278		736.005	746.008	786.131	803.387	796.182	784.972	821.5	825.018	787.4	359.384	32.2333		893.763	843.113	857.364	741.905	800.934	773.059	722.807	774.623	800.946	330.546	59.3274		770.763
	861.768	882.592	883.936	792.128	811.344	829.959	767.06	709.437	817.278	378.649	60.5553		901.897	878.988	819.377	800.659	772.712	709.425	652.471	640.273	771.975	312.625	97.7906		726.262	737.26	762.592	810.324	806.913	823.222	779.419	822.262	783.532	355.516	38.2027		903.797	883.953	849.661	763.76	776.823	791.984	748.281	756.922	809.398	338.998	60.9766		776.745
	855.191	896.768	863.807	754.64	856.985	828.891	728.484	728.204	814.121	375.492	66.8633		896.872	894.729	827.532	790.752	748.781	693.276	648.031	637.106	767.135	307.785	102.958		741.808	757.304	784.249	795.024	797.763	827.086	813.15	843.461	794.981	366.965	33.9769		927.474	872.688	845.15	753.572	786.076	810.103	782.89	764.782	817.842	347.442	59.7729		773.146
	860.57	846.194	830.948	746.072	808.4	795.73	743.009	726.96	794.735	356.106	50.8759		895.583	894.178	831.748	769.216	723.706	710.255	671.289	623.671	764.956	305.606	101.186		750.176	761.793	775.505	787.649	788.682	815.878	813.14	822.094	789.365	361.349	26.2702		947.381	907.2	895.097	738.235	799.969	816.704	787.312	757.487	831.173	360.773	76.1058		802.288
	894.065	824.355	820.862	732.935	790.386	795.373	736.698	708.427	787.888	349.259	60.6009		879.293	875.34	814.99	780.572	742.572	727.777	657.605	616.353	761.813	302.463	95.1812		718.797	763.174	774.834	776.283	779.095	820.26	808.862	828.501	783.726	355.71	35.3865		960.099	895.315	897.463	755.016	808.517	804.18	802.117	769.298	836.501	366.101	72.3266		795.759
	836.205	825.829	820.085	755.195	864.531	778.426	725.096	700.741	788.264	349.635	57.7921		859.044	866.294	823.041	773.33	745.082	721.541	659.132	610.407	757.234	297.884	92.1589		743.079	750.162	754.073	768.976	790.985	840.755	797.038	820.757	783.228	355.212	35.3091		958.947	919.785	907.182	759.926	823.565	853.183	767.651	781.683	846.49	376.09	75.7642		794.925
	830.177	821.617	802.971	752.271	798.388	784.291	719.259	722.182	778.894	340.265	42.9708		859.437	875.997	791.208	806.507	751.863	696.844	644.861	604.144	753.858	294.508	98.4022		756.282	773.602	743.726	764.886	806.556	840.221	811.332	801.722	787.291	359.275	32.7497		968.913	940.363	925.076	760.966	827.186	858.013	776.467	752.959	851.243	380.843	85.5784		807.082
	852.109	839.565	813.228	748.289	813.891	791.72	722.333	722.006	787.893	349.264	51.1773		847.001	830.281	826.432	788.173	732.546	702.517	620.953	607.819	744.465	285.115	94.3671		764.212	789.762	768.069	776.86	822.335	843.724	841.287	823.589	803.73	375.714	32.735		944.865	931.294	914.05	736.071	805.334	817.437	790.241	765.469	838.095	367.695	80.4706		790.84
	809.412	835.9	829.493	759.458	790.396	772.552	731.266						843.502		814.161	775.109	760.663	709.074	670.307	588.993					767.415	787.607	802.024	829.66	814.237	851.542	842.093	836.167	816.343	388.327	29.0358		938.058	885.119	890.336	740.87	808.24	814.484	758.314	755.555	823.872	353.472	73.089		863.929
	805.459	844.557	775.219	768.682	780.277	780.048	741.131						868.309		802.11	794.709	740.954	688.681	660.894	614.987					794.014	801.832	807.992	824.775	821.425	870.27	867.741	838.219	828.283	400.267	28.6946		897.84	862.777	845.61	759.746	815.103	774.283	757.05	738.005	806.302	335.902	57.909		862.474
	803.904		820.261	766.257	770.606	785.69	728.338						857.155		836.095		721.146			636.047					815.837	819.675	851.233	800.224	834.325	917.054	895.954	876.347	851.331	423.315	41.5754		881.17	845.229	804.471	741.809	783.561	817.448	782.783	731.681	798.519	328.119	50.0877		851.816
	828.511		827.652	757.015	766.873	785.44							886.945				735.144			621.971					783.185	789.553	819.771	813.796	846.719	891.492	869.726	864.278	834.815	406.799	39.3215		843.256	819.416	805.09	734.04	805.384	769.427	789.628	753.982	790.028	319.628	35.8929		817.624
	840.818		831.337	765.827	768.799	768.89														614.028					780.926	805.696	815.942	807.305	852.794	875.123	834.144	844.958	827.111	399.095	30.3349		864.505	810.477	806.364	739.74	752.053	760.38	773.002	734.865	780.173	309.773	44.139		830.841
			836.859		803.726	773.872														622.901					735.904	812.204	804.392	826.951	848.975	865.375	840.792	802.169	817.095	389.079	39.6521		865.037	801.265	791.563	736.721	731.231	758.713	720.939	716.741	765.276	294.876	51.0985		812.617
			853.418																	630.637					781.438	797.342	825.865	821.503	832.981	843.53	816.021	828.088	818.346	390.33	20.0663		818.631	776.024	791.366	732.038	754.366	737.298	704.386	719.359	754.183	283.783	38.6951		817.089
																				622.015					766.689	796.891	823.857	827.801	833.629	799.811	812.742	839.868	812.661	384.645	24.0882		774.644	791.258	783.062	715.62	742.147	710.198	697.756	724.246	742.366	271.966	36.1683		761.339
																									738.202	781.478	800.774	806.195	819.263	771.71	836.103	808.294	795.252	367.236	30.6229		796.164	764.631	781.881	713.111	753.205	729.222	716.301	706.554	745.134	274.734	33.8022		767.962
																									709.501	769.94	767.367	833.114	853.057	820.594	814.29	813.395	797.657	369.641	46.0342		789.569	782.258	773.023	704.271	760.587	702.948	718.658	718.69	743.75	273.35	36.2603		762.427
																									693.07	738.181	749.643	783.06	809.024	793.354	783.813	784.428	766.822	338.806	37.6109		797.579	805.116	756.746	689.528	719.845	704.373	680.071	678.593	728.981	258.581	51.3389		783.62
																									742.086	743.447	775.672	770.367	787.737	773.074	784.596	742.45	764.929	336.913	19.2981		802.646	770.829	755.787	699.688	742.266		715.148	696.118					772.595
																									709.559	731.268	752.021	784.598	793.712	767.932	777.558	762.294	759.868	331.852	28.1612		782.112	785.508	760.068	673.212	710.474		713.126	688.432					752.811
																									698.133	750.641	769.384	725.245	763.299	762.55	791.93	765.575	753.345	325.329	29.0928		798.202	776.194	767.256	684.688	727.233		720.152	698.915					743.601
																									682.453	732.212	741.379	712.683	750.638	763.609	760.614	754.015	737.2	309.184	27.6448			794.2	761.073	695.65	718.299		708.644	716.905					761.688
																									681.665	724.33	710.574	762.182	743.523	752.014	763.451	752.782	736.315	308.299	28.7052			794.629	761.575	672.281	739.953		721.796	712.284					750.744
																									681.406	730.621	711.289	725.327	731.389	742.022	735.567	769.623	728.406	300.39	25.2439			814.067	768.299	680.491	738.098		730.376	715.997					733.26
																									685.925	705.323	712.627	720.222	727.074	724.42	735.595	722.062	716.656	288.64	15.3925			826.106	780.394	677.558	756.908		747.723	715.118					756.892
																									691.779	692.296	713.492	739.405	751.973	741.142	746.381	739.467	726.992	298.976	24.3074				775.636		736.879		730.732	733.853					751.873
																									690.738	719.535	731.851	710.916	754.865	741.252		747.785									748.595			718.717
																									715.76	705.474	726.906	692.434	746.435	757.175		757.277									745.437			740.504
																									722.561		747.657	722.611		754.43		755.397												706.044
																														771.026		721.641
[truncated: 29 more columns]

## Sheet: Together
Control		Auxin
Average	Stdev	Average	Stdev
		340.613	40.9623
		342.762	35.8872
		340.735	36.8876
		340.103	35.904
		343.148	37.3085
		343.665	37.2293
350.051	32.5335	344.474	34.7955
353.603	33.4497	343.047	36.1037
357.837	35.6644	338.166	32.8826
361.479	30.3196	342.664	34.6554
361.998	29.0871	345.682	34.6401
362.573	36.2086	346.734	32.6783
367.167	34.1182	347.262	28.6198
370.515	33.4154	348.977	34.9322
372.908	34.1142	348.755	32.9877
376.191	30.489	345.539	34.0966
380.601	30.9795	347.59	36.8795
384.021	28.9566	348.651	39.3995
384.627	29.0135	347.036	37.9146
389.001	29.4156	350.167	37.918
393.954	33.4995	347.101	41.6543
396.671	31.3445	351.451	41.264
398.144	30.5339	354.336	37.8123
403.755	35.358	356.827	35.8642
406.379	37.1974	359.505	37.507
410.995	38.0212	359.769	42.2943
415.526	40.9183	363.544	35.7772
420.465	41.3841	362.238	37.4945
431.79	43.7256	369.988	40.2527
442.876	39.1534	373.097	37.0762
464.221	42.4275	374.619	39.4874
489.117	42.9176	376.072	39.871
541.96	50.7944	384.023	41.485
617.612	65.2873	391.276	39.5099
756.632	82.491	402.97	41.3303
929.395	101.149	410.248	45.9592
1096.84	109.49	415.876	43.516
1173.53	122.977	432.94	51.0999
1116.57	121.039	409.374	46.3844
1002.72	116.285	394.696	47.4036
857.921	121.81	387.403	46.8349
736.714	131.747	377.539	43.2004
640.399	126.104	363.349	42.2413
573.822	117.801	356.519	37.4098
527.58	102.682	348.911	38.5322
483.796	87.4411	335.753	37.2317
458.598	82.7499	330.67	37.629
437.833	76.1958	328.775	36.4976
434.974	78.5659	323.163	33.9441
