# Supplementary material for: Epidermal PAR-6 and PKC-3 are essential for larval development of C. elegans and organize non-centrosomal microtubules
Source: eLife journal article supplement (doi:10.7554/elife.62067), 2020-12-10
Supplement: fig4-figsupp2-data1 [file PKC-3_BOX285_Auxin_5-9.xlsx]

## Sheet: Raw data
		Auxin 5 Anterior				Auxin 6 Anterior				Auxin 7 Anterior				Auxin 8 Anterior
			Anterior				Anterior				Average	Average			Average	Average			Average Anterior				Average stdev
			Average	Average			Average	Average			green	red			green	red
			green	red			green	red										0				0
		0	1023.59	1928.93		0				0				0				1				1
		1	1041.85	1970.7		1				1				1				2				2
		2	1115.49	2132.13		2				2				2				3	1103.71	2103.8		3	178.24	482.402
		3	1229.74	2444.91		3				3				3	977.672	1762.69		4	1164.59	2275.63		4	354.311	723.068
		4	1415.13	2786.92		4				4				4	914.055	1764.34		5	1231.42	2452.31		5	423.888	963.779
		5	1531.15	3133.81		5				5				5	931.683	1770.82		6	1263.1	2448.85		6	454.011	1078.24
		6	1584.13	3211.29		6				6				6	942.061	1686.42		7	1244.92	2405.26		7	471.434	1110.45
		7	1578.28	3190.47		7				7				7	911.57	1620.05		8	1143.95	2179.16		8	314.022	772.393
		8	1366	2725.32		8				8				8	921.904	1632.99		9	1146.95	2128.07		9	232.754	692.041
		9	1311.54	2617.41		9				9				9	982.372	1638.72		10	1095.43	2010.07		10	197.395	585.587
		10	1235.01	2424.14		10				10				10	955.854	1595.99		11	1065.45	1900.73		11	153.533	460.581
		11	1174.01	2226.41		11				11				11	956.884	1575.05		12	1059.04	1858.39		12	139.818	460.806
		12	1157.9	2184.23		12				12				12	960.172	1532.55		13	1041.68	1848.07		13	134.975	458.896
		13	1137.12	2172.56		13				13				13	946.238	1523.58		14	1009.08	1836.66		14	161.499	485.412
		14	1123.28	2179.9		14				14				14	894.883	1493.42		15	1039.67	1894.45		15	137.434	444.047
		15	1136.85	2208.44		15				15				15	942.486	1580.46		16	1061.8	1909.53		16	137.673	511.782
		16	1159.15	2271.42		16				16				16	964.45	1547.65		17	1164.95	1924.43		17	14.5629	504.821
		17	1175.25	2281.39		17				17				17	1154.65	1567.47		18	1167.28	1958.71		18	19.848	554.604
		18	1181.31	2350.87		18				18				18	1153.24	1566.54		19	1118.41	1788.65		19	86.7056	501.449
		19	1193.15	2362.27		19				19	1023.35	1433.49		19	1138.73	1570.19		20	1138.47	1795.84		20	75.9996	494.099
		20	1206.44	2363.61		20				20	1056.41	1463.38		20	1152.55	1560.52		21	1178.27	1758.88		21	117.025	407.6
		21	1198.32	2369.48		21	1335.68	1566.19		21	1080.59	1526.12		21	1098.5	1573.74		22	1192.79	1768.81		22	129.845	397.985
		22	1189.97	2364.05		22	1376.99	1606.8		22	1111.82	1532.68		22	1092.37	1571.68		23	1213.39	1776.04		23	104.512	395.327
		23	1186.49	2366.31		23	1270.59	1613.94		23	1317.22	1526.74		23	1079.25	1597.15		24	1245.94	1788.71		24	157.572	394.231
		24	1194.78	2378.33		24	1254.4	1605.46		24	1455.56	1550.49		24	1079.04	1620.55		25	1277.76	1782.81		25	210.275	386.378
		25	1209.36	2352.33		25	1157.82	1503.83		25	1590.84	1595.87		25	1153	1679.2		26	1317.84	1796.19		26	262.798	393.757
		26	1220.74	2370.37		26	1147.94	1474.43		26	1709.45	1664.16		26	1193.21	1675.79		27	1322.18	1796		27	285.36	394.598
		27	1230.08	2371.71		27	1115.59	1474.61		27	1744.04	1673.86		27	1199.03	1663.82		28	1291.11	1809.46		28	249.99	415.393
		28	1222.62	2407.12		28	1081.92	1444.28		28	1654.09	1699.24		28	1205.8	1687.19		29	1303.19	1790.07		29	296.64	425.276
		29	1218.08	2412.65		29	1046.23	1452.74		29	1731.33	1631.74		29	1217.12	1663.15		30	1302.38	1813.64		30	291.853	433.456
		30	1251.57	2444.68		30	1034.57	1455.76		30	1717.1	1671.43		30	1206.29	1682.7		31	1308.8	1808.97		31	290.063	447.146
		31	1274.11	2460.08		31	1033.4	1443.67		31	1716.12	1694.19		31	1211.57	1637.93		32	1288.12	1812.29		32	269.407	427.95
		32	1279.53	2434.35		32	1013.26	1461.52		32	1655.62	1712.85		32	1204.09	1640.42		33	1293.28	1808.66		33	251.515	446.126
		33	1300.85	2462.07		33	1035.17	1457.73		33	1632.7	1682.28		33	1204.41	1632.55		34	1293.68	1811.18		34	255.992	458.576
		34	1321	2487.65		34	1023.79	1468.37		34	1631.29	1637.94		34	1198.67	1650.76		35	1276.51	1798.31		35	263.85	497.327
		35	1296.93	2536.98		35	1003.22	1454.17		35	1628.53	1593.44		35	1177.38	1608.67		36	1277.87	1793.76		36	243.749	504.353
		36	1325.92	2540.66		36	1018.05	1446.73		36	1591.13	1544.42		36	1176.39	1643.24		37	1278.56	1800.63		37	226.906	515.401
		37	1358.02	2566.13		37	1020.07	1456.76		37	1548.77	1546.31		37	1187.36	1633.33		38	1282.91	1820.52		38	218.902	537.364
		38	1377.77	2615.66		38	1018.18	1470.79		38	1526.34	1518.69		38	1209.33	1676.94		39	1307.07	1827.16		39	229.211	538.599
		39	1410.05	2623.51		39	1040.29	1484.16		39	1565.63	1511.96		39	1212.31	1688.99		40	1315.37	1854.48		40	209.313	524.474
		40	1441.08	2628.06		40	1085.89	1542.7		40	1536.94	1516.43		40	1197.56	1730.73		41	1325	1873.14		41	190.619	523.125
		41	1479.36	2641.88		41	1112.83	1569.72		41	1492.63	1518.63		41	1215.17	1762.33		42	1336.7	1903.31		42	164.084	499.612
		42	1483.8	2628.63		42	1158.46	1617		42	1468.19	1534.79		42	1236.33	1832.82		43	1336.96	1923.06		43	151.631	479.556
		43	1489.69	2606.64		43	1162.37	1653.96		43	1434.29	1536.47		43	1261.49	1895.17		44	1351.94	1958.5		44	152.237	466.485
		44	1516.7	2613.98		44	1169.6	1689.5		44	1427.74	1570.16		44	1293.71	1960.37		45	1362.44	1959.63		45	157.263	449.035
		45	1502.14	2579.11		45	1168.69	1705.62		45	1478.01	1564.95		45	1300.93	1988.82		46	1374.31	1980.06		46	149.884	436.733
		46	1507.07	2581.09		46	1200.41	1711.21		46	1491.53	1609.62		46	1298.23	2018.32		47	1393.76	2007.31		47	163.369	425.576
		47	1546.82	2594.06		47	1216.84	1729.46		47	1517.61	1660.3		47	1293.75	2045.43		48	1416.81	2035.66		48	186.614	401.083
		48	1588.9	2590.58		48	1231.2	1757.47		48	1565.55	1725.55		48	1281.6	2069.04		49	1437.75	2060.74		49	206.59	403.49
		49	1580.67	2631.31		49	1253.13	1736.98		49	1649.2	1819.89		49	1267.99	2054.79		50	1469.5	2101.8		50	264.809	405.516
		50	1592.1	2661.41		50	1282.3	1697.12		50	1783.05	1977.43		50	1220.53	2071.22		51	1503.74	2145.04		51	325.385	405.358
		51	1624.67	2683.31		51	1298.17	1699.57		51	1904.63	2113.75		51	1187.47	2083.54		52	1505.7	2163.79		52	344.135	403.938
		52	1660.54	2692.15		52	1304.49	1710.19		52	1909.52	2156.26		52	1148.27	2096.54		53	1481.84	2175.54		53	332.421	419.291
		53	1631.63	2746.08		53	1309.03	1736.67		53	1866.81	2127.41		53	1119.89	2092.01		54	1459.17	2145.62		54	307.054	408.28
		54	1599.4	2703.18		54	1311.27	1720.92		54	1810.34	2078.07		54	1115.68	2080.3		55	1436.47	2114.52		55	299.63	421.42
		55	1556.65	2698.71		55	1271.01	1692.9		55	1795.63	2017.09		55	1122.6	2049.37		56	1412.71	2101.93		56	316.236	438.97
		56	1523.59	2710.08		56	1246.01	1661.41		56	1800.05	2026.1		56	1081.2	2010.14		57	1385.91	2087.22		57	339.633	466.812
		57	1463.83	2740.78		57	1205.35	1633.21		57	1825.88	2004.26		57	1048.57	1970.64		58	1364.99	2052.85		58	333.198	464.767
		58	1423.23	2705.96		58	1187.55	1607.72		58	1806.08	1978.12		58	1043.08	1919.61		59	1367.04	2042.4		59	344.323	431.615
		59	1389.41	2632.96		59	1191.1	1604.65		59	1839.07	2024.32		59	1048.59	1907.66		60	1356.85	2012.91		60	352.362	380.126
		60	1342.2	2509.4		60	1207.33	1591.57		60	1849.07	2032.93		60	1028.79	1917.75		61	1357.3	1985.57		61	331.389	356.749
		61	1328.36	2448.17		61	1224.89	1589.62		61	1824.02	2018.63		61	1051.92	1885.85		62	1344.59	1967.76		62	325.437	333.04
		62	1305.1	2373.79		62	1220.61	1570.84		62	1805.43	2034.95		62	1047.23	1891.45		63	1346.81	1965.09		63	322.227	312.365
		63	1304.59	2314.45		63	1239.78	1581.23		63	1800.33	2088.91		63	1042.55	1875.77		64	1337.61	1965.69		64	331.882	294.661
		64	1297.02	2280.31		64	1229.3	1588.59		64	1803.2	2090.03		64	1020.93	1903.83		65	1340.47	1968.73		65	342.141	286.277
		65	1262.24	2271.99		65	1224.46	1609.97		65	1833.02	2105.22		65	1042.15	1887.73		66	1341.46	1972.89		66	336.809	287.131
		66	1279.22	2287.25		66	1222.51	1612.71		66	1823.13	2089.96		66	1040.97	1901.65		67	1348.63	1975.16		67	338.005	295.536
		67	1290.28	2314.71		67	1231.2	1617.62		67	1830.28	2080.94		67	1042.75	1887.38		68	1347.92	1965.69		68	332.168	323.172
		68	1276.24	2351.84		68	1260.07	1587.94		68	1818.47	2065.11		68	1036.91	1857.84		69	1364.51	1978.43		69	319.787	353.032
		69	1277.35	2421.99		69	1312.54	1593.64		69	1812.77	2065.99		69	1055.39	1832.08		70	1379.99	2001.42		70	325.663	369.764
		70	1275.13	2458.99		70	1355.52	1600.22		70	1830.8	2111.54		70	1058.51	1834.95		71	1404.47	2020.55		71	336.184	399.31
		71	1300.56	2528.44		71	1388.69	1594.97		71	1864.85	2113.33		71	1063.79	1845.44		72	1407.69	2014.69		72	322.779	403.167
		72	1325.86	2545.3		72	1399.1	1603.55		72	1841.3	2077.25		72	1064.51	1832.66		73	1402.39	2009		73	316.672	418.065
		73	1301.08	2570.61		73	1405.24	1580.76		73	1829.6	2033.54		73	1073.66	1851.1		74	1390.68	2003.12		74	290.01	403.956
		74	1310.06	2547.8		74	1397.38	1587.88		74	1776.23	2016.05		74	1079.03	1860.75		75	1374.54	2017.98		75	273.435	406.33
		75	1321.24	2585.81		75	1361.02	1632.19		75	1738.88	1988.09		75	1077	1865.84		76	1363.03	1992.87		76	271.65	376.682
		76	1341.23	2527.62		76	1306.47	1655.73		76	1729.81	1951.15		76	1074.62	1836.97		77	1351.71	2000.12		77	254.03	362.009
		77	1353.89	2513.39		77	1257.98	1665.59		77	1697.99	1940.97		77	1096.96	1880.55		78	1345.34	1980.69		78	245.258	352.85
		78	1369.6	2489.87		78	1252.19	1674.84		78	1670.31	1875.77		78	1089.25	1882.27		79	1351.45	1977.59		79	238.927	353.056
		79	1394.16	2494.82		79	1267.01	1698.35		79	1656.42	1866.48		79	1088.2	1850.72		80	1354.1	1991.52		80	236.141	363.873
		80	1382.14	2527.28		80	1273.05	1715.09		80	1662.14	1869.73		80	1099.06	1853.97		81	1355.08	2001.68		81	247.033	350.8
		81	1408.49	2521.8		81	1279.51	1753.11		81	1661.35	1867.02		81	1070.99	1864.8		82	1367.71	2006.2		82	242.198	366.034
		82	1439.82	2554.18		82	1297.8	1791.84		82	1654.61	1844.84		82	1078.6	1833.94		83	1386.69	2012.49		83	249.896	333.425
		83	1427.89	2508.62		83	1334.03	1789.08		83	1694.75	1887.78		83	1090.09	1864.49		84	1405.25	2039.58		84	296.754	329.821
		84	1432.19	2514.17		84	1290.19	1769.69		84	1800.27	1997.72		84	1098.35	1876.74		85	1420.33	2066.39		85	347.367	340.479
		85	1431.57	2512.47		85	1263.66	1718.31		85	1897.24	2124.24		85	1088.85	1910.56		86	1404.29	2039.16		86	331.262	354.437
		86	1471.9	2510.74		86	1217.4	1666.9		86	1839.83	2063.62		86	1088.05	1915.4		87	1353.36	1998.63		87	286.427	366.201
		87	1458.5	2516.22		87	1155.97	1652.77		87	1709.2	1907.89		87	1089.77	1917.64		88	1323.48	1957.56		88	244.396	397.009
		88	1488.2	2530.61		88	1140.67	1638.4		88	1575.91	1758.63		88	1089.13	1902.59		89	1306.08	1916.08		89	209.743	397.001
		89	1477.78	2485.2		89	1129.23	1637.75		89	1497.33	1649.9		89	1119.96	1891.49		90	1291.02	1908.67		90	197.195	416.498
		90	1472.65	2498.28		90	1107.66	1612.95		90	1450.06	1616.57		90	1133.7	1906.89		91	1294.67	1887.94		91	191.086	443.071
		91	1461.54	2513.72		91	1098.99	1575.01		91	1455.69	1572.66		91	1162.46	1890.38		92	1306.57	1866.14		92	187.524	431.043
		92	1456.52	2485.79		92	1107.45	1583.28		92	1476.33	1562.27		92	1185.97	1833.23		93	1311.84	1848.48		93	166.696	429.715
		93	1434.85	2471.14		93	1128.67	1592.26		93	1470.12	1535.9		93	1213.73	1794.61		94	1327.39	1840.09		94	162.636	419.952
		94	1441.4	2456.33		94	1150.88	1646.39		94	1487.57	1522.65		94	1229.72	1735		95	1348.99	1834.04		95	137.767	409.891
		95	1418.95	2433.8		95	1213.88	1663.93		95	1507.39	1511.8		95	1255.72	1726.62		96	1352.35	1845.16		96	105.068	412.553
		96	1396.14	2449.41		96	1288.31	1735.4		96	1478.44	1523.19		96	1246.52	1672.63		97	1361.88	1852.75		97	81.1563	417.029
		97	1386.55	2458.46		97	1335.12	1770.02		97	1458.92	1516.27		97	1266.91	1666.23		98	1349.46	1845.76		98	75.7701	418.176
		98	1399.31	2454.35		98	1316.13	1750.61		98	1423.32	1507.28		98	1259.06	1670.81		99	1313.97	1841.46		99	77.3828	428.324
		99	1362.55	2469.55		99	1302.38	1722.04		99	1381.45	1508.89		99	1209.49	1665.34		100	1296.49	1821.16		100	88.5195	460.798
		100	1333.12	2500.16		100	1298.88	1686.95		100	1380.42	1479.65		100	1173.55	1617.86		101	1273.14	1798.82		101	112.89	459.315
		101	1296.28	2481.79		101	1277.91	1630		101	1395.73	1487.97		101	1122.65	1595.51		102	1267	1766.31		102	147.827	441.31
		102	1264.35	2422.29		102	1294.12	1611.28		102	1434.36	1468.67		102	1075.15	1563.01		103	1258.08	1744.03		103	161.563	415.833
		103	1254.71	2362.59		103	1283.26	1607.98		103	1443.93	1478.09		103	1050.42	1527.47		104	1249.98	1728.26		104	186.166	406.655
		104	1246.55	2337.11		104	1263.44	1558.84		104	1472.7	1499.67		104	1017.22	1517.41		105	1235.61	1721.14		105	179.452	419.026
		105	1241.48	2349.46		105	1277.49	1526.38		105	1428.16	1509.02		105	995.308	1499.71		106	1224.86	1701.7		106	180.443	414.648
		106	1235.87	2322.34		106	1263.16	1528.24		106	1417.99	1494.39		106	982.393	1461.83		107	1215.53	1695.67		107	180.328	414.379
		107	1209.01	2316.67		107	1272.13	1507.64		107	1406.2	1493.38		107	974.792	1464.99		108	1188.21	1690.67		108	163.686	437.166
		108	1160.1	2345.3		108	1246.53	1507.96		108	1367.69	1460.28		108	978.507	1449.14		109	1166.86	1670.03		109	160.926	432.527
		109	1136.9	2318		109	1260.11	1484.63		109	1317	1441.53		109	953.421	1435.94		110	1144.26	1661.97		110	147.796	417.38
		110	1096.43	2286.05		110	1245.03	1497.2		110	1278.55	1448.36		110	957.029	1416.28		111	1138.53	1670.17		111	149.695	421.474
		111	1099.9	2299.5		111	1245.59	1514.32		111	1265.47	1448.95		111	943.187	1417.9		112	1137.96	1667.26		112	147.493	420.775
		112	1098.93	2295.31		112	1258.77	1516.4		112	1248.4	1435.51		112	945.74	1421.82		113	1138.87	1657.17		113	154.514	418.914
		113	1095.56	2282.07		113	1262.54	1497.28		113	1258.73	1458.46		113	938.651	1390.86		114	1152.73	1638.5		114	173.361	375.594
		114	1077.6	2196.86		114	1322.48	1514		114	1265.47	1451.93		114	945.381	1391.22		115	1148.64	1626.7		115	202.357	356.572
		115	1044.46	2154.63		115	1369.73	1524.57		115	1257.92	1442.41		115	922.439	1385.19		116	1143.08	1618.68		116	221.821	346.84
		116	1016.47	2127.81		116	1415.31	1542.8		116	1223.36	1434.27		116	917.188	1369.85		117	1133.53	1628.11		117	223.968	349.019
		117	997.25	2139.45		117	1416.92	1556.49		117	1202.78	1441.07		117	917.175	1375.41		118	1136	1637.69		118	234.789	355.465
		118	977.87	2157.29		118	1413.92	1571.98		118	1243.37	1440.26		118	908.831	1381.21		119	1130.28	1606.59		119	230.531	392.245
		119	992.245	2173.14		119	1426.06	1564.78		119	1193.63	1320.11		119	909.188	1368.31		120	1136.13	1651.54		120	222.311	434.086
		120	1011.86	2295.29		120	1415.12	1529.09		120	1205.42	1387.83		120	912.104	1393.96		121	1114.28	1646.38		121	197.912	436.183
		121	1004.88	2298.37		121	1365.89	1480.47		121	1169.89	1406.75		121	916.442	1399.95		122	1115.44	1643.86		122	174.427	455.893
		122	1016.88	2325.68		122	1278.08	1465.97		122	1246.28	1393.97		122	920.535	1389.81		123	1100.41	1633.84		123	179.395	424.922
		123	975.886	2270.03		123	1221.28	1441.32		123	1284.47	1438.98		123	919.986	1385.04		124	1109.76	1641.89		124	187.346	439.069
		124	991.103	2297.87		124	1149.68	1434.14		124	1357.12	1464.78		124	941.126	1370.76		125	1096.8	1618.42		125	220.984	433.119
		125	938.612	2264.47		125	1115.02	1375.96		125	1402.73	1467.44		125	930.819	1365.81		126	976.599	1640.76		126	87.9726	475.269
		126	924.671	2189.18		126	1078.17	1383.94		126				126	926.952	1349.15		127	966.392	1637.5		127	91.2558	495.552
		127	918.52	2209.62		127	1071.62	1360.54		127				127	909.034	1342.35		128	952.055	1652.01		128	80.0208	468.848
		128	889.685	2193.22		128	1042.28	1369.77		128				128	924.199	1393.04		129	959.615	1384.38		129	106.446	16.5623
		129				129	1034.88	1396.09		129				129	884.347	1372.67		130	963.732	1372.5		130	101.425	9.35608
		130				130	1035.45	1379.12		130				130	892.014	1365.89		131	958.56	1383.64		131	100.616	27.8919
		131				131	1029.71	1403.36		131				131	887.414	1363.91		132	907.765	1436.17		132	143.665	82.4718
		132				132	1009.35	1377.85		132				132	806.178	1494.49		133	904.928	1463.57		133	124.66	120.745
		133				133	993.076	1378.19		133				133	816.78	1548.95		134	900.726	1453.09		134	128.519	122.588
		134				134	991.603	1366.41		134				134	809.85	1539.77		135	901.568	1423.39		135	138.454	151.712
		135				135	999.469	1316.11		135				135	803.666	1530.67		136	918.402	1450.51		136	127.285	210.031
		136				136	1008.41	1301.99		136				136	828.398	1599.02		137	930.689	1435.63		137	106.836	194.488
		137				137	1006.23	1298.11		137				137	855.145	1573.15		138				138
		138				138	988.065	1305.08		138				138				139				139
		139				139	985.527	1338.15		139				139				140				140
		140				140	988.508	1337.47		140				140				141				141
		141				141	960.438	1325.45		141				141				142				142
		142				142	937.243	1321.77		142				142				143				143
		143				143	919.993	1320.09		143				143				144				144
		144				144	900.301	1294.13		144				144				145				145
		145				145	901.151	1288.38		145				145				146				146
		146				146	906.213	1287.1		146				146				147				147
		147				147	874.419	1274.43		147				147				148				148
		148				148	872.366	1264.25		148				148				149				149
		149				149	880.131	1280.13		149				149				150				150
		150				150	895.559	1288.68		150				150
							917.212	1310.49
							915.571	1327.18
							917.22	1307.14
							907.037	1308.15
							896.264	1312.61
							907.322	1307.82
							942.872	1311.56
							1052.14	1443.94
							1129.4	1496.38
							1103.01	1506.49

## Sheet: Background corrected
		Auxin 5 Anterior				Auxin 6 Anterior				Auxin 7 Anterior				Auxin 8 Anterior
			Anterior				Anterior				Average	Average			Average	Average			Average Anterior				Average stdev
			Average	Average			Average	Average			green	red			green	red
			green	red			green	red										0				0
		0	535.097	1414.7		0				0				0				1				1
		1	553.356	1456.47		1				1				1				2				2
		2	627.003	1617.9		2				2				2				3	597.205	1576.54		3	203.715	500.831
		3	741.253	1930.68		3				3				3	453.157	1222.39		4	658.088	1748.37		4	379.785	741.498
		4	926.637	2272.69		4				4				4	389.54	1224.05		5	724.915	1925.05		5	449.362	982.208
		5	1042.66	2619.58		5				5				5	407.168	1230.53		6	756.593	1921.59		6	479.485	1096.67
		6	1095.64	2697.06		6				6				6	417.546	1146.13		7	738.422	1878		7	496.908	1128.88
		7	1089.79	2676.24		7				7				7	387.055	1079.76		8	637.449	1651.89		8	339.496	790.822
		8	877.51	2211.09		8				8				8	397.389	1092.7		9	640.452	1600.8		9	258.228	710.47
		9	823.047	2103.18		9				9				9	457.857	1098.43		10	588.932	1482.8		10	222.87	604.016
		10	746.524	1909.91		10				10				10	431.339	1055.7		11	558.946	1373.46		11	179.007	479.01
		11	685.523	1712.18		11				11				11	432.369	1034.75		12	552.536	1331.13		12	165.292	479.235
		12	669.416	1670		12				12				12	435.657	992.257		13	535.178	1320.81		13	160.45	477.325
		13	648.633	1658.33		13				13				13	421.723	983.289		14	502.578	1309.4		14	186.974	503.841
		14	634.789	1665.67		14				14				14	370.368	953.128		15	533.165	1367.19		15	162.908	462.476
		15	648.358	1694.21		15				15				15	417.971	1040.17		16	555.298	1382.27		16	163.148	530.211
		16	670.66	1757.19		16				16				16	439.935	1007.35		17	658.449	1397.17		17	40.0371	523.251
		17	686.76	1767.16		17				17				17	630.139	1027.17		18	660.774	1431.45		18	45.3222	573.033
		18	692.821	1836.64		18				18				18	628.726	1026.25		19	611.126	1260.6		19	95.1187	512.624
		19	704.664	1848.04		19				19	514.502	903.865		19	614.212	1029.9		20	631.182	1267.79		20	85.2368	505.525
		20	717.947	1849.38		20				20	547.56	933.761		20	628.039	1020.22		21	665.385	1212.67		21	113.821	429.288
		21	709.831	1855.25		21	805.981	965.469		21	571.739	996.5		21	573.989	1033.44		22	679.901	1222.59		22	125.111	418.349
		22	701.483	1849.82		22	847.294	1006.08		22	602.972	1003.06		22	567.855	1031.39		23	700.5	1229.82		23	107.269	415.609
		23	698.002	1852.08		23	740.889	1013.22		23	808.37	997.121		23	554.738	1056.85		24	733.056	1242.49		24	161.565	415.674
		24	706.286	1864.1		24	724.699	1004.74		24	946.714	1020.87		24	554.524	1080.26		25	764.868	1236.59		25	215.872	412.949
		25	720.875	1838.1		25	628.126	903.11		25	1081.99	1066.25		25	628.481	1138.9		26	804.949	1249.97		26	267.865	422.468
		26	732.246	1856.13		26	618.242	873.71		26	1200.61	1134.54		26	668.7	1135.49		27	809.296	1249.78		27	291.001	423.349
		27	741.596	1857.48		27	585.888	873.887		27	1235.19	1144.24		27	674.514	1123.52		28	778.222	1263.24		28	256.335	445.306
		28	734.134	1892.89		28	552.224	843.558		28	1145.25	1169.62		28	681.286	1146.9		29	790.304	1243.85		29	302.745	453.404
		29	729.591	1898.42		29	516.533	852.019		29	1222.49	1102.12		29	692.605	1122.86		30	789.493	1267.43		30	299.262	462.265
		30	763.076	1930.44		30	504.868	855.039		30	1208.25	1141.81		30	681.772	1142.41		31	795.913	1262.75		31	298.082	476.012
		31	785.622	1945.85		31	503.702	842.951		31	1207.27	1164.57		31	687.057	1097.63		32	775.237	1266.07		32	278.398	456.954
		32	791.04	1920.12		32	483.558	860.802		32	1146.77	1183.23		32	679.576	1100.13		33	780.394	1262.44		33	261.193	474.4
		33	812.361	1947.84		33	505.472	857.004		33	1123.85	1152.66		33	679.894	1092.26		34	780.797	1264.96		34	266.439	485.859
		34	832.511	1973.42		34	494.087	867.646		34	1122.44	1108.32		34	674.152	1110.47		35	763.625	1252.1		35	273.991	523.46
		35	808.44	2022.75		35	473.518	853.446		35	1119.68	1063.82		35	652.862	1068.38		36	764.985	1247.54		36	255.109	530.085
		36	837.429	2026.43		36	488.354	846.011		36	1082.28	1014.79		36	651.877	1102.95		37	765.669	1254.42		37	239.695	540.756
		37	869.535	2051.9		37	490.373	856.038		37	1039.92	1016.68		37	662.849	1093.04		38	770.02	1274.3		38	232.373	562.097
		38	889.284	2101.43		38	488.483	870.066		38	1017.5	989.07		38	684.815	1136.65		39	794.184	1280.94		39	242.851	562.971
		39	921.564	2109.28		39	510.591	883.442		39	1056.79	982.336		39	687.793	1148.7		40	802.481	1308.26		40	224.236	547.817
		40	952.595	2113.82		40	556.192	941.983		40	1028.09	986.803		40	673.048	1190.43		41	812.112	1326.92		41	207.052	546.033
		41	990.875	2127.65		41	583.134	969.002		41	983.787	989.011		41	690.654	1222.03		42	823.809	1357.09		42	181.077	522.075
		42	995.31	2114.4		42	628.764	1016.28		42	959.344	1005.16		42	711.818	1292.53		43	824.071	1376.84		43	169.184	501.375
		43	1001.2	2092.41		43	632.675	1053.24		43	925.439	1006.85		43	736.97	1354.87		44	839.047	1412.28		44	169.995	488.371
		44	1028.21	2099.75		44	639.9	1088.78		44	918.887	1040.54		44	769.195	1420.07		45	849.553	1413.41		45	174.088	470.379
		45	1013.65	2064.88		45	638.99	1104.9		45	969.159	1035.33		45	776.413	1448.53		46	861.422	1433.84		46	166.8	459.139
		46	1018.58	2066.86		46	670.71	1110.49		46	982.683	1080		46	773.716	1478.02		47	880.867	1461.09		47	180.593	448.853
		47	1058.33	2079.83		47	687.143	1128.74		47	1008.76	1130.67		47	769.234	1505.14		48	903.925	1489.44		48	203.706	425.377
		48	1100.41	2076.34		48	701.498	1156.75		48	1056.7	1195.93		48	757.084	1528.75		49	924.859	1514.52		49	222.04	430.676
		49	1092.18	2117.07		49	723.427	1136.26		49	1140.35	1290.26		49	743.48	1514.49		50	956.609	1555.58		50	278.089	437.058
		50	1103.61	2147.18		50	752.605	1096.4		50	1274.2	1447.81		50	696.018	1530.93		51	990.847	1598.82		51	337.67	439.12
		51	1136.18	2169.08		51	768.468	1098.84		51	1395.78	1584.13		51	662.955	1543.25		52	992.817	1617.57		52	356.936	438.18
		52	1172.05	2177.92		52	774.796	1109.47		52	1400.67	1626.64		52	623.753	1556.25		53	968.953	1629.33		53	345.054	452.206
		53	1143.14	2231.85		53	779.335	1135.95		53	1357.97	1597.79		53	595.373	1551.72		54	946.284	1599.4		54	319.644	440.958
		54	1110.91	2188.95		54	781.57	1120.2		54	1301.49	1548.45		54	591.162	1540.01		55	923.584	1568.3		55	311.979	453.29
		55	1068.16	2184.48		55	741.31	1092.18		55	1286.78	1487.46		55	598.081	1509.08		56	899.827	1555.72		56	328.075	471.066
		56	1035.1	2195.85		56	716.314	1060.68		56	1291.2	1496.48		56	556.684	1469.85		57	873.018	1541.01		57	350.406	498.401
		57	975.338	2226.55		57	675.647	1032.49		57	1317.03	1474.64		57	524.051	1430.35		58	852.098	1506.64		58	343.487	496.177
		58	934.745	2191.73		58	657.853	1007		58	1297.23	1448.5		58	518.564	1379.31		59	854.154	1496.18		59	353.52	464.213
		59	900.924	2118.73		59	661.399	1003.93		59	1330.22	1494.7		59	524.075	1367.36		60	843.959	1466.69		60	360.289	414.335
		60	853.716	1995.17		60	677.629	990.846		60	1340.22	1503.3		60	504.27	1377.45		61	844.409	1439.35		61	338.82	391.061
		61	839.872	1933.94		61	695.191	988.899		61	1315.17	1489.01		61	527.403	1345.56		62	831.704	1421.54		62	332.485	368.61
		62	816.611	1859.56		62	690.912	970.116		62	1296.58	1505.32		62	522.712	1351.16		63	833.926	1418.87		63	329.038	348.456
		63	816.105	1800.22		63	710.081	980.503		63	1291.48	1559.29		63	518.035	1335.47		64	824.721	1419.47		64	338.75	331.365
		64	808.528	1766.08		64	699.597	987.87		64	1294.35	1560.41		64	496.412	1363.54		65	827.578	1422.51		65	347.951	322.617
		65	773.746	1757.76		65	694.763	1009.25		65	1324.17	1575.6		65	517.632	1347.44		66	828.57	1426.68		66	343.119	323.549
		66	790.733	1773.02		66	692.808	1011.99		66	1314.28	1560.34		66	516.457	1361.36		67	835.741	1428.94		67	344.42	331.409
		67	801.791	1800.48		67	701.504	1016.89		67	1321.43	1551.31		67	518.238	1347.09		68	835.035	1419.47		68	337.899	358.482
		68	787.754	1837.61		68	730.369	987.223		68	1309.63	1535.49		68	512.392	1317.55		69	851.625	1432.21		69	324.615	387.166
		69	788.865	1907.76		69	782.841	992.923		69	1303.92	1536.37		69	530.871	1291.78		70	867.103	1455.21		70	329.657	403.803
		70	786.645	1944.76		70	825.824	999.497		70	1321.95	1581.92		70	533.995	1294.65		71	891.586	1474.33		71	340.191	433.027
		71	812.076	2014.21		71	858.99	994.247		71	1356	1583.71		71	539.276	1305.15		72	894.805	1468.48		72	327.296	436.126
		72	837.37	2031.07		72	869.401	1002.83		72	1332.45	1547.63		72	539.998	1292.37		73	889.505	1462.78		73	320.38	450.996
		73	812.588	2056.38		73	875.539	980.034		73	1320.75	1503.92		73	549.144	1310.8		74	877.787	1456.9		74	294.137	436.92
		74	821.57	2033.57		74	867.677	987.158		74	1267.38	1486.43		74	554.519	1320.45		75	861.649	1471.76		75	278.715	437.875
		75	832.753	2071.58		75	831.326	1031.46		75	1230.04	1458.47		75	552.483	1325.54		76	850.144	1446.65		76	278.639	407.309
		76	852.745	2013.39		76	776.771	1055.01		76	1220.96	1421.53		76	550.101	1296.67		77	838.817	1453.91		77	262.427	393.013
		77	865.4	1999.16		77	728.286	1064.86		77	1189.14	1411.34		77	572.445	1340.26		78	832.452	1434.47		78	254.546	382.571
		78	881.113	1975.64		78	722.495	1074.12		78	1161.47	1346.14		78	564.736	1341.97		79	838.558	1431.37		79	248.861	381.483
		79	905.667	1980.59		79	737.307	1097.63		79	1147.57	1336.86		79	563.688	1310.42		80	841.208	1445.3		80	245.513	391.685
		80	893.647	2013.05		80	743.352	1114.37		80	1153.29	1340.1		80	574.546	1313.68		81	842.197	1455.46		81	257.121	377.609
		81	920.001	2007.57		81	749.811	1152.38		81	1152.5	1337.39		81	546.47	1324.51		82	854.821	1459.98		82	252.929	390.417
		82	951.335	2039.95		82	768.102	1191.12		82	1145.76	1315.22		82	554.088	1293.65		83	873.802	1466.27		83	259.192	359.639
		83	939.403	1994.39		83	804.332	1188.35		83	1185.9	1358.16		83	565.572	1324.2		84	892.363	1493.36		84	305.903	359.218
		84	943.706	1999.94		84	760.49	1168.97		84	1291.42	1468.1		84	573.837	1336.44		85	907.442	1520.18		85	356.089	373.558
		85	943.078	1998.24		85	733.96	1117.59		85	1388.39	1594.62		85	564.338	1370.26		86	891.406	1492.95		86	341.901	387.846
		86	983.413	1996.51		86	687.7	1066.18		86	1330.98	1533.99		86	563.531	1375.1		87	840.471	1452.41		87	298.844	397.264
		87	970.011	2001.99		87	626.271	1052.05		87	1200.35	1378.27		87	565.251	1377.34		88	810.589	1411.34		88	259.416	424.794
		88	999.707	2016.38		88	610.973	1037.67		88	1067.06	1229.01		88	564.618	1362.3		89	793.189	1369.87		89	225.983	422.2
		89	989.295	1970.97		89	599.527	1037.03		89	988.485	1120.27		89	595.448	1351.19		90	778.13	1362.45		90	214.21	441.571
		90	984.164	1984.05		90	577.958	1012.23		90	941.214	1086.95		90	609.184	1366.59		91	781.781	1341.72		91	207.901	467.957
		91	973.047	1999.49		91	569.292	974.287		91	946.841	1043.04		91	637.944	1350.08		92	793.683	1319.92		92	203.89	455.228
		92	968.034	1971.56		92	577.754	982.561		92	967.485	1032.64		92	661.459	1292.94		93	798.955	1302.26		93	182.678	452.777
		93	946.361	1956.91		93	598.969	991.538		93	961.275	1006.28		93	689.217	1254.32		94	814.507	1293.87		94	178.367	440.507
		94	952.912	1942.09		94	621.182	1045.67		94	978.726	993.029		94	705.208	1194.71		95	836.098	1287.82		95	152.068	429.45
		95	930.464	1919.57		95	684.183	1063.21		95	998.542	982.174		95	731.202	1186.33		96	839.463	1298.94		96	118.205	429.26
		96	907.651	1935.18		96	758.607	1134.68		96	969.591	993.567		96	722.003	1132.34		97	848.989	1306.53		97	92.8879	432.217
		97	898.065	1944.23		97	805.425	1169.3		97	950.068	986.651		97	742.399	1125.93		98	836.568	1299.55		98	90.3788	433.942
		98	910.822	1940.12		98	786.432	1149.89		98	914.472	977.662		98	734.545	1130.51		99	801.079	1295.24		99	90.7903	445.258
		99	874.058	1955.32		99	772.683	1121.31		99	872.601	979.267		99	684.971	1125.05		100	783.606	1274.94		100	99.6345	478.063
		100	844.636	1985.92		100	769.177	1086.23		100	871.576	950.031		100	649.034	1077.57		101	760.255	1252.6		101	122.093	478.395
		101	807.786	1967.56		101	748.216	1029.27		101	886.879	958.351		101	598.137	1055.21		102	754.108	1220.09		102	154.23	460.126
		102	775.865	1908.06		102	764.425	1010.56		102	925.51	939.046		102	550.634	1022.71		103	745.189	1197.81		103	167.985	434.383
		103	766.218	1848.36		103	753.557	1007.26		103	935.079	948.465		103	525.903	987.175		104	737.088	1182.04		104	192.868	427.295
		104	758.062	1822.88		104	733.737	958.121		104	963.849	970.051		104	492.705	977.118		105	722.72	1174.93		105	185.886	440.764
		105	752.986	1835.23		105	747.788	925.654		105	919.313	979.399		105	470.793	959.417		106	711.968	1155.48		106	187.223	435.505
		106	747.386	1808.11		106	733.466	927.515		106	909.144	964.766		106	457.878	921.536		107	702.645	1149.45		107	185.743	435.971
		107	720.522	1802.44		107	742.435	906.918		107	897.348	963.758		107	450.277	924.694		108	675.32	1144.45		108	167.733	457.87
		108	671.615	1831.07		108	716.832	907.238		108	858.841	930.653		108	453.992	908.845		109	653.97	1123.81		109	163.605	453.45
		109	648.406	1803.76		109	730.415	883.91		109	808.151	911.91		109	428.906	895.647		110	631.371	1115.76		110	148.635	437.725
		110	607.942	1771.82		110	715.326	896.478		110	769.702	918.737		110	432.514	875.986		111	625.646	1123.95		111	150.929	441.264
		111	611.407	1785.27		111	715.887	913.6		111	756.62	919.322		111	418.672	877.608		112	625.072	1121.04		112	147.973	440.259
		112	610.445	1781.08		112	729.069	915.682		112	739.548	905.883		112	421.225	881.53		113	625.982	1110.95		113	154.926	439.1
		113	607.07	1767.83		113	732.843	896.557		113	749.878	928.835		113	414.136	850.569		114	639.846	1092.29		114	170.832	394.836
		114	589.115	1682.62		114	792.777	913.28		114	756.625	922.312		114	420.866	850.931		115	635.751	1080.48		115	197.905	374.906
		115	555.974	1640.4		115	840.036	923.85		115	749.07	912.783		115	397.924	844.897		116	630.196	1072.47		116	215.417	363.764
		116	527.983	1613.58		116	885.616	942.082		116	714.511	904.647		116	392.673	829.559		117	620.643	1081.89		117	216.739	365.634
		117	508.761	1625.22		117	887.218	955.772		117	693.932	911.446		117	392.66	835.115		118	623.109	1091.47		118	227.667	371.566
		118	489.381	1643.06		118	884.218	971.255		118	734.523	910.64		118	384.316	840.916		119	617.394	1060.37		119	223.186	405.932
		119	503.756	1658.91		119	896.359	964.062		119	684.787	790.491		119	384.673	828.019		120	623.239	1105.33		120	215.732	451.783
		120	523.375	1781.06		120	885.421	928.372		120	696.572	858.211		120	387.589	853.667		121	601.388	1100.17		121	191.302	456.068
		121	516.395	1784.14		121	836.192	879.743		121	661.039	877.129		121	391.927	859.653		122	602.555	1097.64		122	170.895	475.93
		122	528.386	1811.45		122	748.385	865.244		122	737.43	864.349		122	396.02	849.515		123	587.519	1087.63		123	176.181	446.562
		123	487.397	1755.8		123	691.584	840.595		123	775.624	909.36		123	395.471	844.749		124	596.869	1095.67		124	187.183	461.22
		124	502.614	1783.64		124	619.984	833.42		124	848.268	935.159		124	416.611	830.467		125	583.91	1072.2		125	220.25	457.106
		125	450.123	1750.24		125	585.325	775.236		125	893.887	937.817		125	406.304	825.519		126	462.364	1089.01		126	76.4573	507.604
		126	436.182	1674.95		126	548.473	783.221		126				126	402.437	808.856		127	452.158	1085.75		127	81.0017	528.382
		127	430.031	1695.39		127	541.924	759.821		127				127	384.519	802.053		128	437.821	1100.26		128	64.7495	502.939
		128	401.196	1678.99		128	512.582	769.045		128				128	399.684	852.745		129	432.508	813.869		129	102.78	26.1667
		129				129	505.185	795.366		129				129	359.832	832.371		130	436.625	801.994		130	97.7589	33.373
		130				130	505.751	778.395		130				130	367.499	825.592		131	431.453	813.127		131	96.9504	14.8372
		131				131	500.007	802.636		131				131	362.899	823.619		132	380.658	865.663		132	140	125.201
		132				132	479.653	777.132		132				132	281.663	954.193		133	377.821	893.066		133	120.994	163.474
		133				133	463.377	777.473		133				133	292.265	1008.66		134	373.619	882.581		134	124.853	165.317
		134				134	461.904	765.684		134				134	285.335	999.477		135	374.461	852.882		135	134.788	194.441
		135				135	469.77	715.392		135				135	279.151	990.373		136	391.295	880		136	123.62	252.76
		136				136	478.707	701.272		136				136	303.883	1058.73		137	403.582	865.121		137	103.17	237.217
		137				137	476.534	697.383		137				137	330.63	1032.86		138				138
		138				138	458.366	704.357		138				138				139				139
		139				139	455.828	737.429		139				139				140				140
		140				140	458.809	736.748		140				140				141				141
		141				141	430.739	724.723		141				141				142				142
		142				142	407.544	721.045		142				142				143				143
		143				143	390.294	719.365		143				143				144				144
		144				144	370.602	693.405		144				144				145				145
		145				145	371.452	687.655		145				145				146				146
		146				146	376.514	686.382		146				146				147				147
		147				147	344.721	673.704		147				147				148				148
		148				148	342.667	663.525		148				148				149				149
		149				149	350.432	679.403		149				149				150				150
		150				150	365.86	687.958		150				150
							387.513	709.763
							385.872	726.454
							387.521	706.422
							377.338	707.433
							366.566	711.887
							377.623	707.096
							413.173	710.84
							522.44	843.216
							599.703	895.657
							573.307	905.764
