# Supplementary material for: Epidermal PAR-6 and PKC-3 are essential for larval development of C. elegans and organize non-centrosomal microtubules
Source: eLife journal article supplement (doi:10.7554/elife.62067), 2020-12-10
Supplement: fig4-figsupp2-data1 [file PKC-3_BOX285_Control_0-4.xlsx]

## Sheet: Raw data
	Anterior Average																				Average Anterior PAR-6 eGFP	Average Anterior PKC-3 mCh		Stdev Anterior PAR-6 eGFP	Stdev Anterior PKC-3 mCh			Posterior Average																				Average Posterior PAR-6 eGFP	Average Posterior PKC-3 mCh
	PKC-3_BOX285_Control_				PKC-3_BOX285_Control_1				PKC-3_BOX285_Control_2				PKC-3_BOX285_Control_3				PKC-3_BOX285_Control_4											PKC-3_BOX285_Control_				PKC-3_BOX285_Control_1				PKC-3_BOX285_Control_2				PKC-3_BOX285_Control_3				PKC-3_BOX285_Control_4
	0				0				0				0	1312.33	1119.62		0			0			0					0				0				0								0			0
	1				1	1293.86	1295.82		1				1	1230.22	1121.63		1			1	1262.04	1208.73	1	45.0031	123.17			1				1				1								1			1
	2				2	1232.36	1208.72		2				2	1219.03	1184.64		2			2	1225.69	1196.68	2	9.42856	17.0278			2				2				2								2			2
	3				3	1247.89	1271.34		3				3	1233.1	1163.65		3			3	1240.5	1217.5	3	10.4599	76.1487			3				3				3								3			3
	4				4	1269.82	1273.32		4				4	1262.79	1169.91		4			4	1266.3	1221.62	4	4.97237	73.1243			4				4				4								4			4
	5				5	1342.8	1349.62		5				5	1635.59	1396.74		5	1034.74	1138.59	5	#REF!	#REF!	5	#REF!	#REF!			5				5				5								5			5
	6				6	1344.48	1321.21		6				6	1600.75	1411.29		6	1057.73	1056.91	6	1326.65	1290.36	6	283.425	138.943			6				6				6								6			6
	7				7	1403.37	1328.12		7				7	1666.25	1406.69		7	1081.09	1116.77	7	1375.78	1263.91	7	305.199	183.517			7				7				7								7			7
	8				8	1424.19	1356.65		8				8	1756.28	1424.17		8	1035.13	1113.85	8	1420.52	1299.2	8	337.612	161.555			8				8				8								8			8
	9				9	1442.35	1343.6		9				9	1910.04	1464.16		9	1067.53	1101.35	9	1462.5	1307.2	9	437.802	177.969			9				9				9								9			9
	10				10	1435.33	1363.29		10				10	2113.55	1480.22		10	1012.74	1167.95	10	1538.8	1314.96	10	530.63	194.004			10				10				10	1528.81	2677.52						10			10
	11				11	1411.07	1341.86		11				11	2283.78	1508.7		11	1129.58	1198.1	11	1569.2	1339.5	11	650.104	170.388			11				11				11	1401.67	2566.04						11	1318.1	1403.18	11	1359.88	1984.61
	12				12	1388.13	1362.74		12				12	2356.67	1508.56		12	1142.54	1149.94	12	1624.79	1356.47	12	646.876	155.321			12				12				12	1316.89	2340.02						12	1377.58	1386.42	12	1347.24	1863.22
	13				13	1378.88	1333.73		13				13	2302.08	1534.06		13	1119.65	1217.61	13	1607.83	1339.25	13	612.741	192.122			13				13				13	1298.78	2018.35						13	1436.01	1393.03	13	1367.39	1705.69
	14	1049.87	1102.83		14	1356.16	1331.01		14	1353.09	1878.48		14	2195.76	1525.66		14	1108.14	1167.82	14	1414.91	1411.12	14	457.555	304.323			14				14				14	1270	1939.28						14	1415.41	1350.38	14	1342.7	1644.83
	15	1039.92	1136.55		15	1367.61	1332.39		15	1981.12	2593.7		15	1904.1	1485.66		15	1093.26	1243.37	15	1480.18	1543.23	15	440.33	603.65			15				15				15	1277.07	1901.62						15	1437.74	1375.67	15	1357.4	1638.64
	16	1015.87	1142.91		16	1356.78	1347.35		16	2123.38	2553.3		16	1662.83	1452.63		16	1037.57	1270.06	16	1450.42	1547.91	16	453.641	573.775			16				16				16	1265.75	1938.29						16	1466.89	1392.23	16	1366.32	1665.26
	17	1019.29	1186.28		17	1379.29	1358.53		17	2382.29	2571.6		17	1545.26	1425.34		17	1079.29	1271.46	17	1472.74	1562.36	17	555.936	571.351			17				17				17	1242.59	1856.4						17	1501.79	1364.79	17	1372.19	1610.59
	18	1410.01	1334.53		18	1406.97	1351.17		18	2790.51	2533.32		18	1481.86	1401.8		18	1114.23	1258.46	18	1633.73	1578.45	18	665.224	535.81			18				18				18	1218.58	1842.31						18	1540.02	1425.24	18	1379.3	1633.77
	19	1294.49	1308.28		19	1446.72	1375.01		19	2552.86	2374.52		19	1494.13	1408.98		19	1071.24	1253.21	19	1580.48	1545.05	19	563.481	467.343			19				19				19	1202.13	1837.61						19	1571.91	1446.93	19	1387.02	1642.27
	20	1176.28	1263.54		20	1502.31	1371.55		20	2637.45	2431.48		20	1566.06	1442.89		20	1081.12	1253.35	20	1590.67	1552.54	20	621.626	497.604			20	1084.57	1384.5		20				20	1166.2	1798.6						20	1587.41	1435.77	20	1279.39	1539.62
	21	1120.75	1237.81		21	1531.89	1395.8		21	2577.04	2453.81		21	1645.85	1443.4		21	1148.91	1319.25	21	1591.33	1556.83	21	604.128	509.228			21	1014.37	1342.83		21				21	1123.09	1828.03						21	1550.98	1452.71	21	1229.48	1541.19
	22	1035.5	1217.29		22	1589.13	1422.63		22	2423.48	2395.86		22	1737.32	1451.18		22	1187.18	1321.2	22	1586.87	1561.24	22	551.901	475.599			22	1065.45	1308.36		22				22	1120.88	1851.33						22	1580.41	1487.82	22	1255.58	1549.17
	23	1005.62	1206.84		23	1585	1418.71		23	2248.32	2366.4		23	1783.27	1450.82		23	1248.57	1276.95	23	1561.88	1552.79	23	492.585	464.662			23	1126.12	1311.2		23				23	1138.64	1885.29						23	1591.59	1506.89	23	1285.45	1567.79
	24	967.521	1200.38		24	1564	1450.76		24	2074.77	2349.67		24	1801.09	1466.31		24	1114.95	1305.08	24	1531.19	1548.82	24	437.892	461.817			24	1099.78	1309.52		24				24	1172.68	1923.63						24	1619.07	1536.47	24	1297.17	1589.87
	25	960.832	1183.53		25	1525.88	1422.15		25	1958.42	2325.54		25	1816.41	1464.71		25	1056.7	1350.57	25	1475.3	1540.2	25	432.101	452.464			25	1091.62	1324.13		25				25	1203.43	1982						25	1622.53	1557.04	25	1305.86	1621.06
	26	944.743	1179.6		26	1491.48	1419.12		26	1888.5	2341.39		26	1768.1	1462.6		26	1098.52	1411.51	26	1429.91	1550.66	26	419.268	454.981			26	1069.2	1288.47		26				26	1240.19	2013.18						26	1671.23	1550.85	26	1326.88	1617.5
	27	936.741	1176.02		27	1465.76	1407.14		27	1832.66	2325.24		27	1738.89	1469.36		27	1074.96	1331.28	27	1414.51	1557.85	27	390.772	443.467			27	1080.26	1323.26		27				27	1292.3	2044.68						27	1681.65	1565.31	27	1351.41	1644.42
	28	931.923	1183.85		28	1476.92	1400.53		28	1843.87	2317.26		28	1704.58	1446.08		28	1016.13	1283.36	28	1406.45	1535.8	28	393.775	447.976			28	1065.86	1316.02		28				28	1353.15	2086.4						28	1733.43	1582.97	28	1384.15	1661.8
	29	941.713	1182.45		29	1478.49	1383.95		29	1823.1	2284.41		29	1634.89	1450.21		29	1016.99	1279.82	29	1378.86	1516.88	29	385.843	440.908			29	1070.45	1332.99		29				29	1457.35	2115.26						29	1785.32	1602.66	29	1437.71	1683.63
	30	952.447	1192.69		30	1504	1388.52		30	1801.07	2338.31		30	1594.18	1470.11		30	1029.77	1301.51	30	1373.74	1533.89	30	371.796	461.86			30	1069.63	1349.26		30				30	1546.57	2116.48						30	1854.52	1643.88	30	1490.24	1703.21
	31	937.549	1206.36		31	1534.04	1377.03		31	1806.35	2377.16		31	1605.69	1498.48		31	1093.57	1404.4	31	1382.68	1552.11	31	379.087	473.438			31	1123.37	1371.46		31				31	1635.9	2140.49						31	1969.09	1691.53	31	1576.12	1734.49
	32	964.504	1195.56		32	1512.45	1412.38		32	1827.71	2437.66		32	1618.62	1534.82		32	1083.21	1389.72	32	1403.37	1596.97	32	362.93	485.514			32	1151.02	1408.69		32				32	1732.97	2160.45						32	2034.33	1727.18	32	1639.44	1765.44
	33	951.785	1196.38		33	1530.86	1387.2		33	1865.37	2442.92		33	1648.29	1524.94		33	1082.32	1312.56	33	1415.9	1588.23	33	385.787	491.902			33	1154.71	1433.26		33				33	1803.92	2167.86						33	2118.16	1822.14	33	1692.26	1807.75
	34	977.02	1190.72		34	1578.99	1417.33		34	1883.76	2460.5		34	1685.2	1542.49		34	1088.68	1468.4	34	1441.46	1584.72	34	393.269	506.486			34	1196.04	1486.49		34				34	1915.52	2198.78						34	2195.53	1873.88	34	1769.03	1853.05
	35	1014.23	1193.2		35	1626.18	1445.17		35	1872.77	2527.94		35	1721.66	1569.41		35	1155.31	1361.11	35	1464.7	1640.82	35	388.246	514.893			35	1225.21	1520.89		35				35	1927.45	2217.21						35	2224.06	1919.05	35	1792.24	1885.72
	36	1029.76	1197.52		36	1677.43	1456.91		36	1877.33	2515.93		36	1770.92	1595.58		36	1178.56	1464.39	36	1502.15	1625.41	36	383.133	518.473			36	1262.32	1549.72		36				36	1961.87	2206.77						36	2226.11	1944.5	36	1816.77	1900.33
	37	1068.97	1205.5		37	1692.5	1507.3		37	1878.62	2507.2		37	1806.6	1585.12		37	1207.59	1404.97	37	1525.05	1653.9	37	374.296	497.824			37	1319.49	1591.19		37				37	1956.28	2231.7						37	2303.94	1964.1	37	1859.9	1929
	38	1091.87	1205.85		38	1700.76	1522.9		38	1851.64	2524.64		38	1807.33	1597.1		38	1282.78	1380.15	38	1531.84	1651.09	38	355.461	510.207			38	1403.56	1643.15		38				38	1915.61	2219.87						38	2354.61	1973.51	38	1891.26	1945.51
	39	1130.43	1220.48		39	1771.17	1540.52		39	1842.86	2589.38		39	1824.55	1628.73		39	1369.52	1524.94	39	1570.36	1671.85	39	337.428	536.143			39	1441.71	1708.87		39				39	1807.65	2186.7						39	2402.33	2009.88	39	1883.9	1968.48
	40	1171.01	1200.83		40	1824.6	1567.67		40	1818.21	2620.94		40	1864.9	1632.67		40	1400.85	1618.62	40	1609.65	1709.41	40	318.167	536.086			40	1503.43	1720.56		40				40	1667.21	2169.74						40	2409.68	2053.8	40	1860.11	1981.37
	41	1197.31	1193.93		41	1865.13	1585.47		41	1807.71	2663.51		41	1897.1	1654.68		41	1453.42	1562.3	41	1633.62	1743.24	41	315.387	547.013			41	1549.62	1756.98		41				41	1557.29	2097.47						41	2400.48	2079.38	41	1835.8	1977.94
	42	1218.81	1217.56		42	1909.35	1587.01		42	1775.93	2644.84		42	1995.69	1700.57		42	1447.38	1772.01	42	1670.64	1742.45	42	325.982	535.769			42	1609.37	1787.73		42				42	1517.99	2081.98						42	2447.46	2096.86	42	1858.28	1988.86
	43	1262.45	1234.48		43	1977.01	1599.44		43	1784.79	2665.39		43	2079.28	1695.06		43	1556.78	1772.24	43	1710.18	1793.28	43	347.322	529.27			43	1650.33	1816.27		43				43	1465.13	2056.76						43	2399.17	2140.04	43	1838.21	2004.36
	44	1283.16	1231.57		44	2087.75	1602.88		44	1866.33	2683.8		44	2138.97	1724.32		44	1653.41	1873.01	44	1786.6	1802.96	44	363.141	536.082			44	1652.71	1826.43		44				44	1455.89	2046.62						44	2374.87	2134.89	44	1827.83	2002.65
	45	1335.39	1276.09		45	2140.8	1635.84		45	1967.21	2679.18		45	2113.61	1767.9		45	1677.45	2013.16	45	1842.08	1846.4	45	343.129	517.198			45	1710.27	1817.67		45				45	1497.48	2043.89						45	2383.43	2163.33	45	1863.73	2008.3
	46	1394.34	1289.04		46	2177.45	1692.24		46	2044.87	2639.41		46	2096.45	1800.96		46	1791.05	1997.53	46	1878.11	1886.96	46	331.429	496.216			46	1722.48	1847.78		46				46	1551.51	2052.47						46	2400.59	2222.98	46	1891.52	2041.08
	47	1448.27	1348.84		47	2281.21	1762.75		47	2122.35	2652.23		47	2140.17	1859.55		47	1907.07	2101.24	47	1956.61	1924.18	47	336.287	473.467			47	1775.15	1850.35		47				47	1648.93	2090.36						47	2473.58	2285.04	47	1965.89	2075.25
	48	1557.65	1402.12		48	2441.94	1860.88		48	2244.58	2705.91		48	2186.11	1893.9		48	1924.06	2278.05	48	2067.47	1992.81	48	343.261	473.385			48	1840.9	1897.02		48				48	1867.25	2167.78						48	2606.96	2329.39	48	2105.04	2131.4
	49	1734.43	1557.98		49	2698.92	2098.35		49	2489.17	2907.68		49	2247.85	1999.18		49	2120.59	2381.05	49	2218.89	2168.25	49	395.583	491.099			49	1997.4	1997.36		49				49	2044.16	2350.52						49	2687.6	2520.57	49	2243.05	2289.48
	50	1999.53	1819.16		50	3303.53	2537.87		50	2801.07	3178.86		50	2435.23	2119.62		50	2875.37	2854.11	50	2531.99	2407.31	50	531.459	510.32			50	2161.04	2143.8		50				50	2213.2	2632.57						50	2847	2668.57	50	2407.08	2481.64
	51	2481.28	2127.68		51	3983.25	3093.3		51	3265.36	3621.81		51	2723.69	2391.94		51	3881.68	3594.89	51	3065.79	2817.77	51	586.623	587.639			51	2310.59	2318.71		51				51	2368.08	2932.66						51	3185.19	2981.22	51	2621.29	2744.2
	52	3027.79	2496.19		52	4163.6	3470.38		52	3679.1	3988.28		52	3094.69	2691.64		52	4940.06	4623.81	52	3569.37	3248.28	52	495.309	630.983			52	2482.94	2512.84		52				52	2464.03	3178.28						52	3651.38	3468.79	52	2866.12	3053.3
	53	3181.88	2679.9		53	3841.56	3399.03		53	3739.56	4023.47		53	3559.18	3047.27		53	4481.61	4520.1	53	3852.45	3554.69	53	657.92	776.168			53	2751.94	2788.3		53				53	2551.43	3188.05						53	4133.94	4056.73	53	3145.77	3344.36
	54	2702.51	2518.58		54	3314.28	3098.4		54	3417.45	3797.97		54	3885.25	3303.11		54	3394.35	3797.51	54	3560.22	3447.63	54	665.421	754.801			54	3030.56	3098.52		54				54	2436.86	2987.24						54	4243.13	4326.65	54	3236.85	3470.8
	55	2172.89	2143.47		55	2816.75	2728.03		55	3035.52	3498.37		55	3980.23	3383.01		55	2898.78	3040.87	55	3079.95	3110.08	55	671.448	666.729			55	3053.64	3271.56		55				55	2247.66	2773.96						55	4017.65	4129.62	55	3106.32	3391.71
	56	1863.27	1830.96		56	2420.56	2397.68		56	2627.67	3121.38		56	3717.5	3243.4		56	2536.94	2760.75	56	2705.56	2726.86	56	681.56	598.342			56	2907.21	3220.67		56				56	2066.73	2634.31						56	3470.06	3561.19	56	2814.67	3138.72
	57	1692	1662.82		57	2130.15	2171.84		57	2312.84	2826.82		57	3262.53	2909.04		57	2189.17	2657.34	57	2386.89	2466.25	57	579.556	535.021			57	2738.43	3073.95		57				57	1905.13	2509.81						57	2870.27	3055.88	57	2504.61	2879.88
	58	1616.14	1590.72		58	1950.92	1972.47		58	2104.07	2650.57		58	2792.98	2582.47		58	2241.88	2562.41	58	2130.66	2290.71	58	430.071	484.843			58	2509.37	2791.76		58				58	1747.18	2388.86						58	2516.18	2745.23	58	2257.58	2641.95
	59	1612.75	1554.59		59	1799.87	1867.22		59	2014.37	2549.31		59	2556.44	2416.26		59	2226.99	2627.07	59	2045.06	2189.96	59	370.203	454.679			59	2410.66	2665.89		59				59	1620.96	2293.6						59	2347.76	2617.84	59	2126.46	2525.78
	60	1652.03	1598.49		60	1759.62	1806.93		60	1994.53	2528.92		60	2476.39	2330.83		60	2270.17	2515.72	60	2021.91	2178.45	60	337.254	453.234			60	2458.82	2710.29		60				60	1586.56	2176.63						60	2430.63	2595.21	60	2158.67	2494.04
	61	1803.69	1669.29		61	1769.4	1810.6		61	2080.17	2621.28		61	2595.6	2445.96		61	2306.45	2557.45	61	2103.8	2212.57	61	343.511	438.79			61	2699.65	2897.02		61				61	1627.95	2080.87						61	2768.01	2866.87	61	2365.2	2614.92
	62	2024.3	1819.27		62	1851.67	1865.77		62	2307.79	2801.89		62	2968.82	2735.17		62	2448.89	2552.46	62	2291.81	2355.91	62	425.468	477.381			62	3060.16	3302.36		62				62	1685.31	2086.17						62	3286.42	3320.57	62	2677.3	2903.03
	63	2329.02	2078.04		63	1986.16	1930.72		63	2643.52	3131.63		63	3358.59	3027.19		63	2547.96	2788.75	63	2553.24	2544.01	63	509.777	541.316			63	3448	3635.27		63				63	1839.07	2160.78						63	3781.15	3697.88	63	3022.74	3164.65
	64	2640.89	2372.48		64	2276.43	2137.25		64	3092.81	3529.06		64	3661.79	3255.35		64	2688.97	3035.93	64	2843.98	2816.58	64	543.532	583.016			64	3543.27	3819.45		64				64	2070.07	2388.23						64	3810.25	3718.5	64	3141.2	3308.73
	65	2635.15	2503.74		65	2691.12	2457.79		65	3584.03	3874.73		65	3895.72	3446.14		65	2802.35	3043.13	65	3099	3063.66	65	595.75	609.402			65	3275.48	3545.82		65				65	2316.35	2698.75						65	3499.98	3472.5	65	3030.6	3239.02
	66	2376.96	2319.1		66	3333.59	2904.04		66	3766.39	3935.86		66	3905.45	3467.65		66	3175.69	3250.45	66	3236.95	3133.95	66	645.174	608.175			66	2896.01	3160.27		66				66	2493.43	2867.53						66	3168.41	3116.25	66	2852.62	3048.02
	67	2064.47	2081.96		67	3621.24	3184.7		67	3387.98	3705.95		67	3645.8	3166.86		67	4003.79	3625.91	67	3179.04	3077.98	67	651.796	599.046			67	2719.28	2814.37		67				67	2498.94	2750.98						67	2820.95	2759.41	67	2679.72	2774.92
	68	1846.78	1824.53		68	3415.41	3126.14		68	2827.23	3317.24		68	3277.51	2892.18		68	4238.46	4157.56	68	3074.14	2957.2	68	804.59	687.842			68	2625.57	2609.04		68				68	2388.45	2531.73						68	2435.31	2448.02	68	2483.11	2529.59
	69	1716.14	1667.08		69	3006.98	2846.48		69	2420	2962.89		69	3047.77	2680.63		69	4025.67	4119.13	69	2885.87	2862.93	69	929.473	887.358			69	2406.73	2457.24		69				69	2175.94	2421.18						69	2224.03	2228.31	69	2268.9	2368.91
	70	1573.01	1565.38		70	2611.01	2483.23		70	2219.47	2725.9		70	2878.08	2503.26		70	3247.8	3522.09	70	2661.45	2679.38	70	907.004	919.992			70	2156.94	2277.57		70				70	2038.56	2377.92						70	2168.9	2111.53	70	2121.47	2255.67
	71	1485.75	1499.23		71	2298.03	2156.22		71	2088.44	2603.73		71	2734.56	2381.64		71	2790.22	3010.64	71	2370.92	2432.58	71	665.164	735.941			71	1950.17	2079.17		71				71	1916.41	2393.87						71	2203.51	2067.18	71	2023.36	2180.07
	72	1454.48	1482.99		72	2028.26	1916.38		72	2014.77	2553.19		72	2620.02	2320.17		72	2692.41	2588.1	72	2181.55	2256.67	72	534.481	586.26			72	1869.66	1987.99		72				72	1785.37	2405.06						72	2221.9	2023.78	72	1958.98	2138.94
	73	1399.74	1462.99		73	1881.54	1767.47		73	1948.3	2509.2		73	2514.31	2241.51		73	2396.59	2389.23	73	2087.26	2113.85	73	520.308	485.051			73	1737.15	1995.05		73				73	1697.39	2357.09						73	2228.65	2016.67	73	1887.73	2122.94
	74	1368.03	1455.74		74	1842.66	1723.56		74	1905.88	2530.15		74	2406.36	2154.78		74	2306.45	2089.47	74	1983.9	2050.69	74	434.199	451.747			74	1641.5	1941.31		74				74	1648.15	2312.25						74	2204.37	1980.1	74	1831.34	2077.89
	75	1348.91	1425.2		75	1841.74	1698.4		75	1872.18	2492.17		75	2336.91	2093		75	2157.38	2165.83	75	1941.24	1959.65	75	404.803	409.912			75	1584.41	1944.82		75				75	1611.94	2279.02						75	2159.18	1966.91	75	1785.18	2063.59
	76	1332.88	1410.01		76	1843.22	1685.19		76	1872.58	2452.83		76	2263.37	2002.25		76	1941.82	2006.53	76	1893.89	1943.22	76	361.834	407.32			76	1537.27	1942.9		76				76	1563.03	2297.99						76	2060.47	1961.68	76	1720.26	2067.52
	77	1313.7	1386.34		77	1836	1682.14		77	1936.86	2454.72		77	2179.6	1974.13		77	1761.49	1863.87	77	1841.6	1900.77	77	320.964	398.707			77	1514.92	1964.65		77				77	1553.54	2316.31						77	1991.11	1965.12	77	1686.53	2082.03
	78	1332.42	1400.06		78	1816.19	1658.67		78	1984.24	2451.44		78	2137.82	1851.07		78	1815.55	1739.33	78	1806.43	1845.02	78	303.41	387.573			78	1547.52	1967.93		78				78	1512.32	2265.23						78	1962.6	2017.44	78	1674.15	2083.53
	79	1313.83	1385.25		79	1798.6	1649.64		79	1986.12	2447.3		79	2101.39	1753.72		79	1682.73	1660.42	79	1803.1	1795.05	79	300.846	393.484			79	1567.84	1991.65		79				79	1485.15	2205.73						79	1990.85	2019.3	79	1681.28	2072.23
	80	1355.36	1388.79		80	1777.63	1669.24		80	1976.52	2429.5		80	2042.1	1701.99		80	1578.61	1530.12	80	1766.87	1769.99	80	272.142	389.566			80	1646.88	1975.44		80				80	1461.69	2121.18						80	2022.55	2046.24	80	1710.37	2047.62
	81	1367.81	1367.91		81	1745.08	1615.2		81	1945.39	2405.2		81	1976.39	1664.36		81	1587.72	1574.64	81	1722.66	1716.56	81	255.518	401.104			81	1733.86	1943.5		81				81	1445.85	2054.53						81	2067.04	2082.89	81	1748.91	2026.98
	82	1351.5	1366.69		82	1690.18	1577.08		82	1862.9	2413.25		82	1873.08	1628.75		82	1624.3	1537.69	82	1673.08	1712.08	82	216.231	404.656			82	1817.81	1954.91		82				82	1465.9	1969.26						82	2078.89	2087.59	82	1787.53	2003.92
	83	1367.1	1355.79		83	1671.07	1559.16		83	1807.81	2454.89		83	1793.39	1637.65		83	1609.55	1568.95	83	1652.73	1709.04	83	177.881	429.537			83	1884.89	1995.07		83				83	1470.59	1913.19						83	2103.66	2094.45	83	1819.72	2000.9
	84	1381.29	1352.32		84	1622.08	1551.88		84	1781.51	2494.74		84	1762.36	1612.68		84	1451.18	1633.17	84	1631.36	1716.11	84	160.314	446.635			84	1961.28	1985.73		84				84	1508.58	1888.53						84	2078	2109.26	84	1849.29	1994.5
	85	1348.16	1316.96		85	1577.83	1534.33		85	1763.14	2483.77		85	1703.24	1617.28		85	1489.29	1696.25	85	1568.71	1717.1	85	172.076	446.738			85	1964.16	1989.97		85				85	1519.2	1852.11						85	2102.6	2091.82	85	1861.99	1977.97
	86	1335.79	1300.68		86	1557.93	1519.7		86	1745.33	2492.94		86	1662.62	1621.41		86	1484.85	1763.25	86	1558.19	1726.2	86	158.221	453.729			86	1908.38	1979.32		86				86	1530.69	1860.15						86	2060.28	2038.18	86	1833.12	1959.22
	87	1309.01	1294.63		87	1562.56	1542.82		87	1729.83	2510.56		87	1661.96	1595.3		87	1652.46	1809.31	87	1549.64	1741.31	87	163.826	461.646			87	1767.14	1960.65		87				87	1533.63	1883.43						87	1990.62	2016.54	87	1763.8	1953.54
	88	1263.74	1254.69		88	1586.67	1547.92		88	1739.04	2512.89		88	1646.74	1621.36		88	1800.01	1939.44	88	1577.73	1749.23	88	183.736	471.228			88	1575.93	1910.51		88				88	1522.77	1906.03						88	1946.57	2005.65	88	1681.76	1940.73
	89	1238.85	1235.56		89	1610.11	1519.45		89	1752.12	2524.66		89	1591.97	1606.18		89	1828.86	2072.36	89	1598.61	1765.06	89	220.076	493.288			89	1452.29	1892.77		89				89	1517.67	1933.63						89	1915.85	1971.23	89	1628.6	1932.54
	90	1189.26	1239.75		90	1618.77	1536.2		90	1742.44	2544.75		90	1599.41	1608.62		90	1942.46	2071.09	90	1595.75	1800.34	90	245.781	512.087			90	1379.72	1944.25		90				90	1494.41	1947						90	1889.44	1971.16	90	1587.86	1954.14
	91	1150.3	1222.75		91				91	1733.38	2574.68		91	1585.34	1596.8		91	2007.82	2026.58	91	1602.87	1866.33	91	335.402	586.1			91	1329.38	1948.09		91				91	1485.02	1909.95						91	1940.28	1989.96	91	1584.89	1949.33
	92	1111.41	1213.1		92				92	1722.14	2509.71		92	1568.69	1565.88		92	2058.96	1887.65	92	1602.52	1828.82	92	374.572	563.021			92	1310.59	1938.71		92				92	1481.62	1895.64						92	2003.8	2005.64	92	1598.67	1946.66
	93	1092.64	1213.81		93				93	1730.06	2521.76		93	1576.71	1558.46		93	1930.68	1898.8	93	1614.59	1795.42	93	401.939	556.923			93	1280.58	1960.32		93				93	1518.38	1824.48						93	2054.41	2023.06	93	1617.79	1935.95
	94	1101.14	1207.24		94				94	1753.43	2547.58		94	1630.18	1584.19		94	2076.23	1909.24	94	1603.86	1809.45	94	357.119	567.516			94	1289.53	1925.38		94				94	1560.3	1796.51						94	2140.36	2043.42	94	1663.4	1921.77
	95	1102.31	1198.88		95				95	1793.83	2482.32		95	1640.2	1580.63		95	1877.09	1818.75	95	1653.14	1792.77	95	409.219	543.676			95	1301.29	1893.65		95				95	1622.81	1760.3						95	2150.91	2043.53	95	1691.67	1899.16
	96	1052.13	1164.37		96				96	1823.59	2462.2		96	1671.23	1580.27		96	1728.67	1834.59	96	1606.01	1756.4	96	379.413	542.701			96	1324.05	2090.79		96				96	1682.92	1786.06						96	2154.65	2120.47	96	1720.54	1999.11
	97	1069.19	1159.96		97				97	1920.71	2439.22		97	1654.61	1611.39		97	1678.83	1804.82	97	1593.29	1761.29	97	366.954	531.987			97	1324.22	2000.89		97				97	1732.44	1779.81						97	2082.86	2078.72	97	1713.18	1953.14
	98	1043.68	1166.29		98				98	1706.8	2350.07		98	1693.58	1590.68		98	1631.31	1744.7	98	1530.72	1727.97	98	324.894	492.36			98	1502.01	1791.15		98				98	1781.71	1758.73						98	2063.38	2090.34	98	1782.37	1880.08
	99	1062.31	1146.93		99				99	1817.6	2355.86		99	1695.69	1609.49		99	1719.83	1813.22	99	1551.73	1714.24	99	335.298	498.47			99				99				99	1821.16	1738.44						99	1972.03	2104.24	99	1896.59	1921.34
	100	1051.3	1132.6		100				100	1828.83	2330		100	1713.23	1581.82		100	1807.79	1910.17	100	1578.3	1714.41	100	355.31	498.263			100				100				100	1906.86	1726.34						100	1889.76	2074.39	100	1898.31	1900.37
	101	1032.98	1151.45		101				101	1917.66	2218.08		101	1667.22	1584.83		101	1794.49	1818.58	101	1606.41	1716.13	101	395.791	456.692			101				101				101	1929.13	1721.21						101	1869.12	2016.29	101	1899.12	1868.75
	102	933.748	1115.92		102				102	1904.77	2228.49		102	1637.8	1578.51		102	1995.29	1788.23	102	1567.7	1685.37	102	436.601	464.906			102				102				102	1678.72	1661.51						102	1823.35	1949.92	102	1751.04	1805.71
	103	887.111	1115.08		103				103	1962.18	2197.25		103	1669.32	1555.01		103	2131.36	1817.66	103	1628.47	1663.89	103	515.492	452.025			103				103				103	1732.83	1641.05						103	1782.95	1919.41	103	1757.89	1780.23
	104				104				104				104	1682.79	1554.17		104	2118.38	1944.06	104	1907.07	1685.92	104	317.185	186.314			104				104				104	1932.84	1746.9						104	1736.29	1923.72	104	1834.57	1835.31
	105				105				105				105	1717.47	1541.06		105	2177.77	1945.9	105	1917.93	1742.56	105	283.485	284.964			105				105				105	1996.6	1700.76						105	1673.87	1875.11	105	1835.24	1787.93
	106				106				106				106	1743.93	1527.75		106	2354.51	2024.96	106	1960.85	1736.82	106	306.768	295.673			106				106				106	1952.15	1634.6						106	1603.41	1852.62	106	1777.78	1743.61
	107				107				107				107	1660.18	1490.91		107	2026.47	1857.34	107	2007.35	1757.94	107	490.962	377.631			107				107				107	1917.62	1565.48						107			107
	108				108				108				108	1629.45	1481.11		108	1986.41	1919.5	108	1827.96	1669.22	108	280.736	266.034			108				108				108	1498.56	1484.06						108			108
	109				109				109				109	1568.74	1436.94		109	1914.24	1984.42	109	1777.58	1678.22	109	295.338	341.219			109				109				109	1425.5	1453.72						109			109
	110				110				110				110	1548.65	1397.5		110	1727.07	2016.38	110	1731.44	1690.96	110	258.513	415.016			110				110				110								110			110
	111				111				111				111	1508.21	1380.79		111	1710.29	1930.23	111	1617.64	1698.59	111	154.751	449.436			111				111				111								111			111
	112				112				112				112	1455.45	1314.83		112	1585.68	1850.94	112	1582.87	1622.53	112	180.198	435.154			112				112				112								112			112
	113				113				113				113	1466.53	1320.15		113	1673.53	1913.84	113	1526.11	1585.55	113	84.25	375.326			113				113				113								113			113
	114				114				114				114	1579.53	1348.78		114	1597.05	1846.33	114	1626.53	1631.31	114	66.4652	399.557			114				114				114								114			114
	115				115				115				115	1632.03	1404.1		115			115	1614.54	1625.22	115	24.7374	312.708			115				115				115								115			115
	116				116				116				116	2113.09	1572.09		116			116			116					116				116				116								116			116
	117				117				117				117				117			117			117					117				117				117								117			117
	118				118				118				118				118			118			118					118				118				118								118			118
	119				119				119				119				119			119			119					119				119				119								119			119
	120				120				120				120				120			120			120					120				120				120								120			120
	121				121				121				121				121			121			121					121				121				121								121			121
	122				122				122				122				122			122			122					122				122				122								122			122
	123				123				123				123				123			123			123					123				123				123								123			123
	124				124				124				124				124			124			124					124				124				124								124			124
	125				125				125				125				125			125			125					125				125				125								125			125
	126				126				126				126				126			126			126					126				126				126								126			126
	127				127				127				127				127			127			127					127				127				127								127			127
	128				128				128				128				128			128			128					128				128				128								128			128
	129				129				129				129				129			129			129					129				129				129								129			129
	130				130				130				130				130			130			130					130				130				130								130			130
	131				131				131				131				131			131			131					131				131				131								131			131
	132				132				132				132				132			132			132					132				132				132								132			132
	133				133				133				133				133			133			133					133				133				133								133			133
	134				134				134				134				134			134			134					134				134				134								134			134
	135				135				135				135				135			135			135					135				135				135								135			135
	136				136				136				136				136			136			136					136				136				136								136			136
	137				137				137				137				137			137			137					137				137				137								137			137
	138				138				138				138				138			138			138					138				138				138								138			138
	139				139				139				139				139			139			139					139				139				139								139			139
	140				140				140				140				140			140			140					140				140				140								140			140
	141				141				141				141				141			141			141					141				141				141								141			141
	142				142				142				142				142			142			142					142				142				142								142			142
	143				143				143				143				143			143			143					143				143				143								143			143
	144				144				144				144				144			144			144					144				144				144								144			144
	145				145				145				145				145			145			145					145				145				145								145			145
	146				146				146				146				146			146			146					146				146				146								146			146
	147				147				147				147				147			147			147					147				147				147								147			147
	148				148				148				148				148			148			148					148				148				148								148			148
	149				149				149				149				149			149			149					149				149				149								149			149
	150				150				150				150				150			150			150					150				150				150								150			150
[truncated: 9 more columns]

## Sheet: Background corrected
	Anterior Average																				Average Anterior PAR-6 eGFP	Average Anterior PKC-3 mCh		Stdev Anterior PAR-6 eGFP	Stdev Anterior PKC-3 mCh			Posterior Average																				Average Posterior PAR-6 eGFP	Average Posterior PKC-3 mCh
	PKC-3_BOX285_Control_				PKC-3_BOX285_Control_1				PKC-3_BOX285_Control_2				PKC-3_BOX285_Control_3				PKC-3_BOX285_Control_4											PKC-3_BOX285_Control_				PKC-3_BOX285_Control_1				PKC-3_BOX285_Control_2				PKC-3_BOX285_Control_3				PKC-3_BOX285_Control_4
	0				0				0				0	794.973	528.865		0			0			0					0				0				0								0			0
	1				1	832.425	713.9		1				1	712.857	530.88		1			1	772.641	622.39	1	84.5473	129.415			1				1				1								1			1
	2				2	770.925	626.8		2				2	701.667	593.887		2			2	736.296	610.343	2	48.9728	23.273			2				2				2								2			2
	3				3	786.457	689.422		3				3	715.74	572.899		3			3	751.098	631.16	3	50.0041	82.3938			3				3				3								3			3
	4				4	808.383	691.404		4				4	745.427	579.159		4			4	776.905	635.282	4	44.5166	79.3694			4				4				4								4			4
	5				5	881.367	767.696		5				5	1118.23	805.985		5	488.463	456.87	5	829.354	676.85	5	318.089	191.468			5				5				5								5			5
	6				6	883.041	739.286		6				6	1083.39	820.538		6	511.455	375.196	6	825.961	645.007	6	290.207	237.168			6				6				6								6			6
	7				7	941.934	746.198		7				7	1148.89	815.942		7	534.812	435.051	7	875.214	665.73	7	312.431	202.795			7				7				7								7			7
	8				8	962.751	774.73		8				8	1238.92	833.421		8	488.857	432.134	8	896.843	680.095	8	379.35	216.736			8				8				8								8			8
	9				9	980.911	761.675		9				9	1392.68	873.413		9	521.254	419.635	9	964.948	684.908	9	435.932	236.429			9				9				9								9			9
	10				10	973.9	781.374		10				10	1596.19	889.468		10	466.465	486.228	10	1012.18	719.023	10	565.833	208.725			10				10				10	1033.58	1851.56						10			10
	11				11	949.638	759.938		11				11	1766.42	917.947		11	583.307	516.386	11	1099.79	731.424	11	605.678	202.293			11				11				11	906.439	1740.07						11	771.822	721.462	11	839.13	1230.77
	12				12	926.691	780.822		12				12	1839.32	917.803		12	596.263	468.222	12	1120.76	722.282	12	643.848	230.437			12				12				12	821.668	1514.05						12	831.308	704.705	12	826.488	1109.38
	13				13	917.449	751.811		13				13	1784.73	943.313		13	573.38	535.893	13	1091.85	743.672	13	624.221	203.832			13				13				13	803.549	1192.39						13	889.734	711.31	13	846.642	951.848
	14	494.067	444.545		14	894.721	749.09		14	857.863	1052.51		14	1678.4	934.91		14	561.868	486.106	14	897.383	733.433	14	470.847	267.991			14				14				14	774.769	1113.31						14	869.133	668.661	14	821.951	890.985
	15	484.119	478.268		15	906.177	750.475		15	1485.9	1767.74		15	1386.74	894.904		15	546.982	561.65	15	961.983	890.607	15	463.303	516.538			15				15				15	781.839	1075.65						15	891.465	693.948	15	836.652	884.799
	16	460.068	484.63		16	895.347	765.433		16	1628.16	1727.33		16	1145.47	861.874		16	491.297	588.345	16	924.067	885.522	16	486.87	493.116			16				16				16	770.52	1112.32						16	920.617	710.515	16	845.569	911.418
	17	463.488	527.999		17	917.851	776.614		17	1887.06	1745.64		17	1027.9	834.583		17	533.012	589.739	17	965.863	894.915	17	568.881	492.221			17				17				17	747.367	1030.43						17	955.52	683.076	17	851.443	856.753
	18	854.2	676.247		18	945.532	769.254		18	2295.29	1707.35		18	964.501	811.044		18	567.957	576.741	18	1125.49	908.127	18	672.897	455.811			18				18				18	723.355	1016.34						18	993.747	743.523	18	858.551	879.933
	19	738.681	649.998		19	985.283	793.091		19	2057.63	1548.55		19	976.77	818.225		19	524.969	571.494	19	1056.67	876.272	19	591.02	389.338			19				19				19	706.907	1011.64						19	1025.64	765.217	19	866.272	888.43
	20	620.476	605.255		20	1040.88	789.631		20	2142.22	1605.52		20	1048.7	852.14		20	534.848	571.629	20	1077.42	884.834	20	640.145	420.053			20	528.765	726.218		20				20	670.968	972.636						20	1041.14	754.053	20	746.956	817.635
	21	564.949	579.526		21	1070.46	813.883		21	2081.81	1627.85		21	1128.49	852.646		21	602.636	637.535	21	1089.67	902.287	21	612.118	421.6			21	458.562	684.55		21				21	627.865	1002.06						21	1004.7	770.995	21	697.043	819.202
	22	479.695	559.008		22	1127.7	840.709		22	1928.26	1569.9		22	1219.96	860.432		22	640.91	639.486	22	1079.3	893.906	22	568.895	399.312			22	509.642	650.078		22				22	625.653	1025.36						22	1034.14	806.103	22	723.145	827.182
	23	449.818	548.559		23	1123.56	836.789		23	1753.09	1540.43		23	1265.91	860.07		23	702.299	595.237	23	1058.94	876.217	23	506.724	396.644			23	570.319	652.919		23				23	643.415	1059.33						23	1045.31	825.167	23	753.015	845.804
	24	411.716	542.1		24	1102.56	868.843		24	1579.54	1523.7		24	1283.73	875.555		24	568.675	623.357	24	989.246	886.712	24	489.498	385.459			24	543.97	651.234		24				24	677.454	1097.66						24	1072.79	854.748	24	764.739	867.881
	25	405.027	525.244		25	1064.44	840.226		25	1463.19	1499.57		25	1299.05	873.953		25	510.429	668.855	25	948.427	881.571	25	471.302	372.798			25	535.814	665.844		25				25	708.201	1156.04						25	1076.26	875.327	25	773.425	899.07
	26	388.938	521.319		26	1030.04	837.199		26	1393.27	1515.42		26	1250.75	871.847		26	552.249	729.787	26	923.05	895.115	26	436.667	372.738			26	513.397	630.19		26				26	744.967	1187.21						26	1124.96	869.135	26	794.441	895.512
	27	380.936	517.732		27	1004.32	825.223		27	1337.43	1499.28		27	1221.53	878.606		27	528.692	649.558	27	894.583	874.08	27	422.127	377.715			27	524.458	664.981		27				27	797.075	1218.71						27	1135.38	883.592	27	818.971	922.428
	28	376.118	525.564		28	1015.48	818.614		28	1348.64	1491.3		28	1187.22	855.331		28	469.853	601.644	28	879.462	858.49	28	434.303	380.413			28	510.057	657.732		28				28	857.924	1260.44						28	1187.15	901.256	28	851.712	939.809
	29	385.908	524.166		29	1017.06	802.027		29	1327.88	1458.45		29	1117.53	859.46		29	470.719	598.097	29	863.817	848.44	29	414.163	368.175			29	514.649	674.703		29				29	962.122	1289.29						29	1239.04	920.939	29	905.272	961.645
	30	396.642	534.408		30	1042.57	806.597		30	1305.84	1512.34		30	1076.82	879.361		30	483.495	619.789	30	861.073	870.499	30	398.612	384.687			30	513.823	690.979		30				30	1051.34	1290.51						30	1308.25	962.163	30	957.804	981.218
	31	381.745	548.08		31	1072.6	795.106		31	1311.12	1551.19		31	1088.34	907.727		31	547.297	722.685	31	880.221	904.958	31	395.384	384.147			31	567.564	713.171		31				31	1140.67	1314.52						31	1422.82	1009.81	31	1043.68	1012.5
	32	408.699	537.28		32	1051.01	830.463		32	1332.48	1611.69		32	1101.26	944.07		32	536.942	708.002	32	886.08	926.301	32	394.516	411.78			32	595.217	750.403		32				32	1237.74	1334.49						32	1488.06	1045.47	32	1107.01	1043.45
	33	395.98	538.092		33	1069.42	805.285		33	1370.15	1616.95		33	1130.93	934.184		33	536.045	630.837	33	900.504	905.071	33	415.201	426.457			33	598.902	774.972		33				33	1308.7	1341.9						33	1571.88	1140.43	33	1159.83	1085.77
	34	421.215	532.433		34	1117.55	835.405		34	1388.54	1634.54		34	1167.84	951.735		34	542.403	786.68	34	927.509	948.158	34	421.622	413.141			34	640.237	828.21		34				34	1420.29	1372.82						34	1649.25	1192.16	34	1236.59	1131.06
	35	458.43	534.913		35	1164.75	863.255		35	1377.55	1701.98		35	1204.3	978.658		35	609.037	679.393	35	962.811	951.639	35	403.316	452.583			35	669.408	862.61		35				35	1432.22	1391.25						35	1677.79	1237.33	35	1259.81	1163.73
	36	473.958	539.233		36	1215.99	874.987		36	1382.1	1689.96		36	1253.56	1004.83		36	632.284	782.668	36	991.579	978.336	36	408.817	432.694			36	706.518	891.441		36				36	1466.64	1380.81						36	1679.84	1262.78	36	1284.33	1178.34
	37	513.164	547.212		37	1231.07	925.379		37	1383.39	1681.23		37	1289.24	994.369		37	661.317	723.253	37	1015.64	974.288	37	398.288	432.427			37	763.684	932.909		37				37	1461.05	1405.74						37	1757.67	1282.38	37	1327.47	1207.01
	38	536.066	547.57		38	1239.32	940.982		38	1356.41	1698.67		38	1289.97	1006.35		38	736.505	698.433	38	1031.66	978.401	38	370.149	442.993			38	847.755	984.862		38				38	1420.38	1393.9						38	1808.34	1291.79	38	1358.83	1223.52
	39	574.625	562.196		39	1309.73	958.597		39	1347.63	1763.42		39	1307.19	1037.98		39	823.251	843.225	39	1072.49	1033.08	39	352.512	446.302			39	885.904	1050.58		39				39	1312.43	1360.74						39	1856.06	1328.16	39	1351.46	1246.49
	40	615.202	542.547		40	1363.16	985.751		40	1322.98	1794.98		40	1347.54	1041.91		40	854.573	936.898	40	1100.69	1060.42	40	344.788	455.232			40	947.624	1062.28		40				40	1171.99	1343.77						40	1863.41	1372.09	40	1327.67	1259.38
	41	641.503	535.651		41	1403.69	1003.55		41	1312.48	1837.54		41	1379.74	1063.93		41	907.151	880.578	41	1128.91	1064.25	41	338.697	478.23			41	993.82	1098.69		41				41	1062.06	1271.5						41	1854.2	1397.66	41	1303.36	1255.95
	42	663.006	559.273		42	1447.92	1005.09		42	1280.7	1818.88		42	1478.33	1109.81		42	901.105	1090.3	42	1154.21	1116.67	42	358.002	451.934			42	1053.57	1129.45		42				42	1022.77	1256.02						42	1901.19	1415.15	42	1325.84	1266.87
	43	706.644	576.201		43	1515.58	1017.52		43	1289.56	1839.43		43	1561.92	1104.31		43	1010.5	1090.52	43	1216.84	1125.6	43	359.336	454.08			43	1094.53	1157.99		43				43	969.9	1230.79						43	1852.89	1458.33	43	1305.77	1282.37
	44	727.353	573.284		44	1626.32	1020.96		44	1371.1	1857.84		44	1621.61	1133.57		44	1107.13	1191.29	44	1290.7	1155.39	44	380.677	461.551			44	1096.91	1168.14		44				44	960.666	1220.66						44	1828.6	1453.17	44	1295.39	1280.66
	45	779.587	617.81		45	1679.36	1053.92		45	1471.98	1853.21		45	1596.25	1177.15		45	1131.18	1331.44	45	1331.67	1206.71	45	372.684	448.483			45	1154.47	1159.38		45				45	1002.25	1217.92						45	1837.16	1481.61	45	1331.29	1286.31
	46	838.537	630.76		46	1716.01	1110.32		46	1549.64	1813.44		46	1579.09	1210.21		46	1244.78	1315.81	46	1385.61	1216.11	46	350.938	424.443			46	1166.67	1189.49		46				46	1056.28	1226.5						46	1854.31	1541.26	46	1359.09	1319.09
	47	892.462	690.557		47	1819.78	1180.83		47	1627.13	1826.26		47	1622.81	1268.8		47	1360.8	1419.52	47	1464.6	1277.19	47	359.067	410.862			47	1219.35	1192.06		47				47	1153.7	1264.39						47	1927.3	1603.32	47	1433.45	1353.26
	48	1001.85	743.832		48	1980.5	1278.96		48	1749.35	1879.94		48	1668.75	1303.15		48	1377.78	1596.33	48	1555.65	1360.44	48	377.209	422.981			48	1285.09	1238.74		48				48	1372.02	1341.81						48	2060.69	1647.68	48	1572.6	1409.41
	49	1178.63	899.696		49	2237.49	1516.43		49	1993.94	2081.71		49	1730.49	1408.43		49	1574.32	1699.33	49	1742.97	1521.12	49	404.541	431.542			49	1441.59	1339.07		49				49	1548.93	1524.55						49	2141.33	1838.85	49	1710.62	1567.49
	50	1443.73	1160.88		50	2842.1	1955.95		50	2305.84	2352.89		50	1917.87	1528.87		50	2329.1	2172.39	50	2167.73	1834.2	50	521.174	486.012			50	1605.23	1485.51		50				50	1717.97	1806.6						50	2300.72	1986.85	50	1874.64	1759.66
	51	1925.47	1469.4		51	3521.81	2511.38		51	2770.13	2795.85		51	2206.33	1801.19		51	3335.41	2913.18	51	2751.83	2298.2	51	691.776	633.489			51	1754.78	1660.43		51				51	1872.86	2106.7						51	2638.92	2299.5	51	2088.85	2022.21
	52	2471.99	1837.9		52	3702.17	2888.46		52	3183.87	3162.31		52	2577.33	2100.89		52	4393.79	3942.09	52	3265.83	2786.33	52	802.125	845.121			52	1927.13	1854.56		52				52	1968.81	2352.31						52	3105.11	2787.07	52	2333.68	2331.31
	53	2626.07	2021.61		53	3380.13	2817.11		53	3244.34	3197.51		53	3041.82	2456.51		53	3935.34	3838.38	53	3245.54	2866.22	53	479.37	696.147			53	2196.14	2130.02		53				53	2056.2	2362.09						53	3587.66	3375.02	53	2613.33	2622.37
	54	2146.71	1860.3		54	2852.84	2516.48		54	2922.23	2972		54	3367.89	2712.35		54	2848.08	3115.8	54	2827.55	2635.39	54	437.476	491.153			54	2474.76	2440.24		54				54	1941.63	2161.27						54	3696.86	3644.93	54	2704.41	2748.81
	55	1617.08	1485.19		55	2355.31	2146.11		55	2540.29	2672.4		55	3462.87	2792.26		55	2352.5	2359.15	55	2465.61	2291.02	55	660.506	517.613			55	2497.84	2613.27		55				55	1752.43	1948						55	3471.38	3447.9	55	2573.88	2669.72
	56	1307.47	1172.67		56	1959.13	1815.76		56	2132.45	2295.42		56	3200.14	2652.64		56	1990.66	2079.03	56	2117.97	2003.11	56	683.677	556.287			56	2351.41	2562.39		56				56	1571.5	1808.34						56	2923.78	2879.47	56	2282.23	2416.73
	57	1136.19	1004.53		57	1668.71	1589.92		57	1817.62	2000.85		57	2745.17	2318.29		57	1642.9	1975.62	57	1802.12	1777.84	57	586.557	503.551			57	2182.63	2415.67		57				57	1409.9	1683.85						57	2324	2374.16	57	1972.18	2157.89
	58	1060.33	932.44		58	1489.49	1390.55		58	1608.84	1824.6		58	2275.62	1991.72		58	1695.6	1880.7	58	1625.98	1604	58	437.541	439.347			58	1953.56	2133.47		58				58	1251.95	1562.89						58	1969.91	2063.51	58	1725.14	1919.96
	59	1056.95	896.303		59	1338.44	1285.3		59	1519.14	1723.35		59	2039.09	1825.51		59	1680.72	1945.35	59	1526.87	1535.16	59	368.248	435.471			59	1854.85	2007.61		59				59	1125.74	1467.63						59	1801.49	1936.12	59	1594.03	1803.79
	60	1096.23	940.204		60	1298.18	1225.01		60	1499.3	1702.95		60	1959.03	1740.08		60	1723.9	1834	60	1515.33	1488.45	60	340.376	386.88			60	1903.02	2052.01		60				60	1091.33	1350.66						60	1884.36	1913.49	60	1626.24	1772.05
	61	1247.88	1011		61	1307.96	1228.68		61	1584.94	1795.31		61	2078.24	1855.21		61	1760.17	1875.73	61	1595.84	1553.19	61	340.508	404.086			61	2143.84	2238.74		61				61	1132.72	1254.9						61	2221.73	2185.15	61	1832.77	1892.93
	62	1468.5	1160.99		62	1390.23	1283.85		62	1812.57	1975.93		62	2451.46	2144.41		62	1902.62	1870.74	62	1805.07	1687.18	62	422.125	437.517			62	2504.36	2644.07		62				62	1190.08	1260.2						62	2740.14	2638.85	62	2144.86	2181.04
	63	1773.22	1419.75		63	1524.72	1348.8		63	2148.29	2305.67		63	2841.23	2436.44		63	2001.68	2107.03	63	2057.83	1923.54	63	497.561	506.676			63	2892.19	2976.99		63				63	1343.84	1334.81						63	3234.88	3016.17	63	2490.3	2442.66
	64	2085.09	1714.2		64	1815	1555.33		64	2597.58	2703.1		64	3144.43	2664.59		64	2142.69	2354.21	64	2356.96	2198.29	64	522.387	534.864			64	2987.46	3161.17		64				64	1574.85	1562.27						64	3263.98	3036.78	64	2608.76	2586.74
	65	2079.34	1845.45		65	2229.68	1875.87		65	3088.8	3048.76		65	3378.36	2855.39		65	2256.08	2361.41	65	2606.45	2397.38	65	585.463	550.445			65	2719.67	2887.54		65				65	1821.12	1872.78						65	2953.71	2790.78	65	2498.17	2517.03
	66	1821.16	1660.81		66	2872.15	2322.12		66	3271.16	3109.89		66	3388.09	2876.9		66	2629.42	2568.73	66	2796.4	2507.69	66	624.544	559.983			66	2340.21	2501.99		66				66	1998.2	2041.56						66	2622.14	2434.53	66	2320.18	2326.03
	67	1508.66	1423.68		67	3159.81	2602.78		67	2892.75	2879.98		67	3128.44	2576.11		67	3457.52	2944.19	67	2829.44	2485.35	67	765.097	615.516			67	2163.47	2156.08		67				67	2003.72	1925.01						67	2274.67	2077.69	67	2147.29	2052.93
	68	1290.97	1166.25		68	2953.98	2544.22		68	2332	2491.28		68	2760.15	2301.43		68	3692.19	3475.84	68	2605.86	2395.8	68	884.453	824.37			68	2069.76	1950.75		68				68	1893.23	1705.76						68	1889.04	1766.3	68	1950.68	1807.61
	69	1160.34	1008.8		69	2545.55	2264.56		69	1924.77	2136.93		69	2530.41	2089.88		69	3479.4	3437.41	69	2328.09	2187.52	69	857.327	861.634			69	1850.92	1798.95		69				69	1680.72	1595.21						69	1677.75	1546.6	69	1736.46	1646.92
	70	1017.2	907.097		70	2149.58	1901.31		70	1724.24	1899.94		70	2360.72	1912.5		70	2701.52	2840.38	70	1990.65	1892.25	70	649.254	683.744			70	1601.14	1619.28		70				70	1543.33	1551.96						70	1622.63	1429.81	70	1589.03	1533.68
	71	929.95	840.95		71	1836.6	1574.3		71	1593.21	1777.76		71	2217.2	1790.89		71	2243.94	2328.92	71	1764.18	1662.56	71	539.866	537.728			71	1394.36	1420.88		71				71	1421.18	1567.91						71	1657.24	1385.46	71	1490.93	1458.08
	72	898.674	824.703		72	1566.82	1334.46		72	1519.55	1727.22		72	2102.66	1729.41		72	2146.13	1906.38	72	1646.77	1504.43	72	509.762	433.801			72	1313.86	1329.7		72				72	1290.15	1579.1						72	1675.63	1342.06	72	1426.54	1416.95
	73	843.935	804.708		73	1420.11	1185.55		73	1453.07	1683.23		73	1996.95	1650.76		73	1850.32	1707.51	73	1512.88	1406.35	73	449.405	399.319			73	1181.34	1336.77		73				73	1202.16	1531.12						73	1682.38	1334.95	73	1355.29	1400.95
	74	812.228	797.457		74	1381.23	1141.64		74	1410.65	1704.18		74	1889	1564.03		74	1760.18	1407.75	74	1450.66	1323.01	74	418.915	360.439			74	1085.69	1283.02		74				74	1152.92	1486.29						74	1658.09	1298.38	74	1298.9	1355.9
	75	793.101	766.912		75	1380.31	1116.48		75	1376.95	1666.21		75	1819.55	1502.25		75	1611.11	1484.11	75	1396.2	1307.19	75	383.981	362.807			75	1028.61	1286.54		75				75	1116.72	1453.06						75	1612.91	1285.2	75	1252.74	1341.6
	76	777.08	751.725		76	1381.78	1103.27		76	1377.35	1626.87		76	1746.02	1411.5		76	1395.55	1324.81	76	1335.55	1243.64	76	349.233	332.909			76	981.466	1284.61		76				76	1067.8	1472.02						76	1514.2	1279.96	76	1187.82	1345.53
	77	757.896	728.056		77	1374.56	1100.22		77	1441.63	1628.76		77	1662.24	1383.38		77	1215.22	1182.15	77	1290.31	1204.51	77	338.169	335.547			77	959.117	1306.37		77				77	1058.32	1490.34						77	1444.84	1283.4	77	1154.09	1360.04
	78	776.62	741.781		78	1354.76	1076.75		78	1489.01	1625.47		78	1620.46	1260.32		78	1269.27	1057.62	78	1302.02	1152.39	78	322.595	323.559			78	991.711	1309.65		78				78	1017.1	1439.26						78	1416.32	1335.72	78	1141.71	1361.54
	79	758.027	726.966		79	1337.17	1067.72		79	1490.89	1621.33		79	1584.03	1162.96		79	1136.45	978.699	79	1261.31	1111.54	79	328.442	327.87			79	1012.03	1333.37		79				79	989.923	1379.77						79	1444.57	1337.59	79	1148.84	1350.24
	80	799.552	730.507		80	1316.2	1087.32		80	1481.29	1603.54		80	1524.74	1111.23		80	1032.33	848.405	80	1230.82	1076.2	80	308.952	335.718			80	1091.08	1317.16		80				80	966.462	1295.22						80	1476.27	1364.52	80	1177.94	1325.63
	81	812.01	709.625		81	1283.64	1033.28		81	1450.16	1579.23		81	1459.03	1073.61		81	1041.45	892.923	81	1209.26	1057.73	81	279.25	324.482			81	1178.05	1285.22		81				81	950.625	1228.57						81	1520.76	1401.17	81	1216.48	1304.99
	82	795.696	708.405		82	1228.75	995.159		82	1367.67	1587.28		82	1355.72	1038		82	1078.02	855.973	82	1165.17	1036.96	82	237.416	333.656			82	1262.01	1296.63		82				82	970.676	1143.3						82	1532.62	1405.87	82	1255.1	1281.93
	83	811.294	697.502		83	1209.63	977.239		83	1312.59	1628.93		83	1276.03	1046.9		83	1063.28	887.233	83	1134.56	1047.56	83	204.283	350.421			83	1329.09	1336.79		83				83	975.368	1087.22						83	1557.38	1412.73	83	1287.28	1278.91
	84	825.49	694.035		84	1160.64	969.961		84	1286.29	1668.77		84	1245.01	1021.93		84	904.907	951.452	84	1084.47	1061.23	84	207.134	362.583			84	1405.48	1327.45		84				84	1013.36	1062.56						84	1531.73	1427.54	84	1316.85	1272.51
	85	792.359	658.68		85	1116.4	952.415		85	1267.92	1657.8		85	1185.88	1026.52		85	943.021	1014.53	85	1061.12	1061.99	85	192.072	365.091			85	1408.36	1331.69		85				85	1023.98	1026.14						85	1556.32	1410.11	85	1329.55	1255.98
	86	779.984	642.396		86	1096.5	937.778		86	1250.1	1666.97		86	1145.26	1030.66		86	938.572	1081.53	86	1042.08	1071.87	86	184.587	373.62			86	1352.58	1321.04		86				86	1035.46	1034.18						86	1514.01	1356.46	86	1300.68	1237.23
	87	753.2	636.346		87	1101.12	960.904		87	1234.61	1684.6		87	1144.6	1004.55		87	1106.19	1127.59	87	1067.94	1082.8	87	183.902	382.252			87	1211.34	1302.36		87				87	1038.4	1057.46						87	1444.35	1334.82	87	1231.36	1231.55
	88	707.938	596.409		88	1125.23	965.997		88	1243.81	1686.92		88	1129.38	1030.61		88	1253.74	1257.72	88	1092.02	1107.53	88	223.166	401.697			88	1020.12	1252.22		88				88	1027.54	1080.07						88	1400.3	1323.93	88	1149.32	1218.74
	89	683.042	577.274		89	1148.67	937.532		89	1256.89	1698.69		89	1074.61	1015.42		89	1282.59	1390.65	89	1089.16	1123.91	89	241.988	432.099			89	896.484	1234.49		89				89	1022.44	1107.66						89	1369.58	1289.52	89	1096.17	1210.56
	90	633.457	581.463		90	1157.34	954.284		90	1247.21	1718.78		90	1082.05	1017.87		90	1396.19	1389.37	90	1103.25	1132.35	90	287.497	435.39			90	823.916	1285.96		90				90	999.185	1121.03						90	1343.17	1289.45	90	1055.42	1232.15
	91	594.495	564.462		91				91	1238.15	1748.72		91	1067.98	1006.04		91	1461.55	1344.86	91	1090.54	1166.02	91	367.88	502.986			91	773.575	1289.8		91				91	989.794	1083.98						91	1394.01	1308.24	91	1052.46	1227.34
	92	555.606	554.815		92				92	1226.92	1683.75		92	1051.33	975.128		92	1512.69	1205.94	92	1086.64	1104.91	92	401.846	470.712			92	754.789	1280.43		92				92	986.39	1069.67						92	1457.52	1323.92	92	1066.23	1224.67
	93	536.836	555.527		93				93	1234.83	1695.79		93	1059.35	967.71		93	1384.41	1217.08	93	1053.86	1109.03	93	369.394	476.9			93	724.771	1302.03		93				93	1023.16	998.511						93	1508.14	1341.35	93	1085.36	1213.96
	94	545.335	548.952		94				94	1258.2	1721.62		94	1112.82	993.44		94	1529.95	1227.53	94	1111.58	1122.88	94	415.198	488.393			94	733.722	1267.09		94				94	1065.08	970.546						94	1594.08	1361.7	94	1130.96	1199.78
	95	546.502	540.596		95				95	1298.6	1656.35		95	1122.84	989.879		95	1330.81	1137.03	95	1074.69	1080.96	95	363.793	459.894			95	745.484	1235.37		95				95	1127.58	934.329						95	1604.64	1361.81	95	1159.23	1177.17
	96	496.325	506.083		96				96	1328.37	1636.24		96	1153.87	989.516		96	1182.39	1152.88	96	1040.24	1071.18	96	370.576	466.179			96	768.243	1432.5		96				96	1187.7	960.095						96	1608.37	1438.75	96	1188.1	1277.12
	97	513.388	501.676		97				97	1425.48	1613.25		97	1137.25	1020.64		97	1132.56	1123.11	97	1052.17	1064.67	97	384.424	455.799			97	768.42	1342.61		97				97	1237.22	953.845						97	1536.58	1397	97	1180.74	1231.15
	98	487.877	508.004		98				98	1211.58	1524.11		98	1176.22	999.925		98	1085.04	1062.98	98	990.177	1023.75	98	339.083	415.715			98	946.207	1132.87		98				98	1286.48	932.766						98	1517.11	1408.63	98	1249.93	1158.09
	99	506.504	488.645		99				99	1322.37	1529.89		99	1178.33	1018.74		99	1173.56	1131.51	99	1045.19	1042.2	99	365.702	429.261			99				99				99	1325.93	912.477						99	1425.75	1422.52	99	1375.84	1167.5
	100	495.49	474.313		100				100	1333.6	1504.03		100	1195.87	991.069		100	1261.52	1228.45	100	1071.62	1049.47	100	388.184	436.989			100				100				100	1411.63	900.371						100	1343.49	1392.68	100	1377.56	1146.52
	101	477.173	493.171		101				101	1422.43	1392.11		101	1149.87	994.073		101	1248.22	1136.86	101	1074.42	1004.06	101	413.808	378.299			101				101				101	1433.9	895.24						101	1322.85	1334.57	101	1378.37	1114.9
	102	377.943	457.638		102				102	1409.54	1402.52		102	1120.44	987.754		102	1449.01	1106.51	102	1089.24	988.606	102	496.302	394.612			102				102				102	1183.5	835.543						102	1277.08	1268.2	102	1230.29	1051.87
	103	331.306	456.793		103				103	1466.95	1371.28		103	1151.96	964.259		103	1585.08	1135.94	103	1133.83	982.069	103	565.383	387.898			103				103				103	1237.6	815.088						103	1236.68	1237.69	103	1237.14	1026.39
	104				104				104				104	1165.43	963.421		104	1572.11	1262.35	104	1368.77	1112.88	104	287.565	211.372			104				104				104	1437.62	920.935						104	1190.01	1242	104	1313.82	1081.47
	105				105				105				105	1200.11	950.312		105	1631.49	1264.18	105	1415.8	1107.24	105	305.03	221.937			105				105				105	1501.38	874.798						105	1127.6	1193.39	105	1314.49	1034.09
	106				106				106				106	1226.57	936.999		106	1808.23	1343.24	106	1517.4	1140.12	106	411.298	287.259			106				106				106	1456.92	808.638						106	1057.14	1170.9	106	1257.03	989.767
	107				107				107				107	1142.82	900.159		107	1480.2	1175.62	107	1311.51	1037.89	107	238.561	194.781			107				107				107	1422.39	739.514						107			107
	108				108				108				108	1112.09	890.357		108	1440.14	1237.78	108	1276.12	1064.07	108	231.966	245.664			108				108				108	1003.33	658.096						108			108
	109				109				109				109	1051.39	846.187		109	1367.97	1302.7	109	1209.68	1074.44	109	223.856	322.806			109				109				109	930.273	627.75						109			109
	110				110				110				110	1031.29	806.747		110	1180.79	1334.67	110	1106.04	1070.71	110	105.715	373.295			110				110				110								110			110
	111				111				111				111	990.855	790.034		111	1164.02	1248.51	111	1077.44	1019.27	111	122.446	324.192			111				111				111								111			111
	112				112				112				112	938.095	724.077		112	1039.41	1169.23	112	988.751	946.652	112	71.638	314.769			112				112				112								112			112
	113				113				113				113	949.173	729.403		113	1127.26	1232.12	113	1038.22	980.76	113	125.924	355.473			113				113				113								113			113
	114				114				114				114	1062.18	758.024		114	1050.78	1164.62	114	1056.48	961.319	114	8.0589	287.504			114				114				114								114			114
	115				115				115				115	1114.68	813.346		115			115	1114.68	813.346	115	#DIV/0!	#DIV/0!			115				115				115								115			115
	116				116				116				116	1595.73	981.336		116			116			116					116				116				116								116			116
	117				117				117				117				117			117			117					117				117				117								117			117
	118				118				118				118				118			118			118					118				118				118								118			118
	119				119				119				119				119			119			119					119				119				119								119			119
	120				120				120				120				120			120			120					120				120				120								120			120
	121				121				121				121				121			121			121					121				121				121								121			121
	122				122				122				122				122			122			122					122				122				122								122			122
	123				123				123				123				123			123			123					123				123				123								123			123
	124				124				124				124				124			124			124					124				124				124								124			124
	125				125				125				125				125			125			125					125				125				125								125			125
	126				126				126				126				126			126			126					126				126				126								126			126
	127				127				127				127				127			127			127					127				127				127								127			127
	128				128				128				128				128			128			128					128				128				128								128			128
	129				129				129				129				129			129			129					129				129				129								129			129
	130				130				130				130				130			130			130					130				130				130								130			130
	131				131				131				131				131			131			131					131				131				131								131			131
	132				132				132				132				132			132			132					132				132				132								132			132
	133				133				133				133				133			133			133					133				133				133								133			133
	134				134				134				134				134			134			134					134				134				134								134			134
	135				135				135				135				135			135			135					135				135				135								135			135
	136				136				136				136				136			136			136					136				136				136								136			136
	137				137				137				137				137			137			137					137				137				137								137			137
	138				138				138				138				138			138			138					138				138				138								138			138
	139				139				139				139				139			139			139					139				139				139								139			139
	140				140				140				140				140			140			140					140				140				140								140			140
	141				141				141				141				141			141			141					141				141				141								141			141
	142				142				142				142				142			142			142					142				142				142								142			142
	143				143				143				143				143			143			143					143				143				143								143			143
	144				144				144				144				144			144			144					144				144				144								144			144
	145				145				145				145				145			145			145					145				145				145								145			145
	146				146				146				146				146			146			146					146				146				146								146			146
	147				147				147				147				147			147			147					147				147				147								147			147
	148				148				148				148				148			148			148					148				148				148								148			148
	149				149				149				149				149			149			149					149				149				149								149			149
	150				150				150				150				150			150			150					150				150				150								150			150
[truncated: 9 more columns]
