# Supplementary material for: Epidermal PAR-6 and PKC-3 are essential for larval development of C. elegans and organize non-centrosomal microtubules
Source: eLife journal article supplement (doi:10.7554/elife.62067), 2020-12-10
Supplement: fig5-data1 [file Directionality 1-2 hours L2.xlsx]

## Sheet: Controls
MAX_191002_P6AID_ebp2eGFP_C_L2short_3							MAX_191002_P6AID_ebp2eGFP_C_L2short_12							MAX_191002_P6AID_ebp2eGFP_C_L2short_1							MAX_191002_P6AID_ebp2eGFP_C_L2short_4							MAX_191002_P6AID_ebp2eGFP_C_L2short_5
	Area	Mean	Min	Max	Angle	Length		Area	Mean	Min	Max	Angle	Length		Area	Mean	Min	Max	Angle	Length		Area	Mean	Min	Max	Angle	Length		Area	Mean	Min	Max	Angle	Length
1	0.554	8096.92	4433	10019.4	95.856	4.619	1	0.415	8305.12	6012.34	12415.3	104.036	3.395	1	0.471	6290.68	4396.86	9850.92	104.036	3.871	1	0.484	7123.78	5225.18	11900.5	64.179	4.052	1	42	7781.98	6153.25	11338.6	140.906	41.231
2	0.581	6937.88	5151.5	9471.6	105.751	4.784	2	0.471	7873.59	4685.49	15688.3	101.976	3.899	2	0.581	6758.57	4611.67	9737.03	75.964	4.86	2	0.498	6985.2	4987.78	10102	151.26	4.159	2	49	10216	5226.5	13893.2	36.634	47.901
3	0.526	6632.14	4476.5	8749.61	91.548	4.296	3	0.526	8326.38	5747	13316.9	107.447	4.372	3	0.415	6561.3	4857.49	9035.81	119.249	3.405	3	0.36	7916.98	5968.76	10469.1	78.69	2.988	3	13	9815.73	6105	14550.3	114.444	12.298
4	0.554	7342.84	5547.28	10236.1	146.725	4.552	4	0.374	11667.4	8499.86	14407	60.524	3.087	4	0.443	6822.51	4347.26	9492.23	86.309	3.657	4	0.401	8490.05	6301.05	10863.4	114.775	3.345	4	18	7313.26	6170.25	9091.37	156.371	17.007
5	0.484	7619.51	5452.5	9111.78	84.958	4.016	5	0.388	10541	6927.68	15203.2	143.973	3.153	5	0.498	8220.75	5211.67	10385.7	88.363	4.118	5	0.415	8414.3	6892.48	10556	95.906	3.43	5	28	9181.85	6413.25	11194.8	118.443	26.618
6	0.36	7127.29	5731.58	9091.17	92.386	2.888	6	0.304	9920.85	7505.4	13345.9	117.759	2.503	6	0.498	8310.61	6134.6	9742.26	163.61	4.132	6	0.457	7645.42	5856.51	10802	55.305	3.736	6	31	7845.24	5887	10719.7	9.462	30.414
7	0.304	7795.57	6304	8795.14	90	2.412	7	0.36	9727.03	5524.42	12636.6	90	2.882	7	0.291	8679.57	6882.67	10693.1	87.138	2.4	7	0.429	8428.53	7473.28	11230.4	70.346	3.498	7	38	8589.34	5433	11278.6	120.7	36.963
8	0.401	8303.02	6583.77	10904.8	115.641	3.237	8	0.304	12080.3	6209.25	15360.9	115.346	2.42	8	0.346	8214.52	6952.89	9699	90	2.824	8	0.401	8252.33	6374.5	9923.71	165.466	3.24	8	79	10776.6	6775	13829.7	17.969	77.642
9	0.54	7550.61	5452	10042.3	140.389	4.474	9	0.54	8927.35	6575.32	13467.1	40.601	4.422	9	0.346	8190.8	6639.6	9770.4	114.444	2.824	9	0.388	9117.01	6945.09	12795.5	83.66	3.19	9	30	8654.62	5966.06	12703.4	104.036	28.862
10	0.609	7100.6	5870.82	8791.14	66.975	5.091	10	0.72	8724.73	6265.09	12243	161.565	5.953	10	0.346	7379	6369.31	9360.89	90	2.863	10	0.36	7877.15	5851.19	10734	118.61	2.897	10	19	8694.5	6656.38	10968.8	80.538	18.337
11	0.443	6977.98	5155.25	8621.82	80.838	3.704	11	0.457	11034.5	7992.1	14075.8	128.66	3.721	11	0.346	7789.76	6284.49	9251.62	58.241	2.872	11	0.277	7872.92	6280.37	10730	96.009	2.248	11	18	9861.19	7693	11045.3	125.538	16.919
12	0.581	7020.35	6009.27	9085	94.185	4.832	12	0.429	9303.49	5530.44	13457.9	82.147	3.495	12	0.304	7698.2	6411	9046.71	58.57	2.524	12	0.332	10116.7	7396.47	13169.2	87.397	2.648	12	18	9673.12	7538.5	11511	76.759	17.464
13	0.429	6324.33	4969.02	7518.5	72.759	3.572	13	0.443	8220.42	4193.75	15931.2	70.974	3.609	13	0.651	8740.31	7073.2	11502.3	169.919	5.416	13	0.54	7854.82	5758.38	9883.32	116.565	4.499	13	26	8701.25	6308.49	10997.7	73.74	25.48
14	0.471	7456.06	6134.89	9149.56	109.537	3.906	14	0.346	9459.68	6621	13518.5	60.255	2.846	14	0.332	8181.1	6563.4	10321.4	136.736	2.746	14	0.567	7729.66	5442.34	11129.3	53.13	4.706	14	32	8971.27	7133.87	10945.8	95.528	31.145
15	0.498	8097.81	4066	10967.2	108.435	4.148	15	0.263	10006.8	8059.94	12776.4	29.358	2.16	15	0.221	8415.46	7051.32	10245.1	33.69	1.741	15	0.512	7292.79	5178.25	9336.43	101.31	4.257	15	25	7883.51	6135.09	11317.8	73.072	23.717
16	0.457	6758.01	4547.5	8943.21	100.954	3.773	16	0.263	10492.8	6758	13523	99.462	2.147	16	0.471	8393.75	5293.24	12536.5	61.113	3.931	16	0.651	6743.76	4735.09	10680.7	96.203	5.45	16	26	9478.25	6824.76	12432.6	115.56	25.495
17	0.471	6915.94	4702	9853.93	106.189	3.854	17	0.291	10907.4	6254.35	16174.4	92.862	2.354	17	0.457	7383.89	5465.4	9665.62	47.603	3.722	17	0.443	6294.83	4116.5	9996.92	25.71	3.604	17	14	10890.6	7405.5	13375.4	90	12.51
18	0.471	8042.62	5606	8956.07	96.911	3.904	18	0.291	10617.7	7457	14907.4	162.474	2.327	18	0.443	7249.41	5274.1	9592.67	54.246	3.601	18	0.526	7876.94	6000.32	10727.8	38.418	4.355	18	31	9668.11	6055.4	12832	47.726	29.732
19	0.512	8121.07	6348	9685.44	78.69	4.199	19	0.36	8491.58	5928.12	13203.2	80.538	2.912	19	0.498	7823.11	6158.13	9649.67	161.03	4.068	19	0.554	7125.38	3579.5	10778.5	109.359	4.614	19	32	9501.55	6111	11422.4	99.162	30.907
20	0.374	7893.33	6246.64	11665.8	110.556	3.037	20	0.415	7939.84	6574.85	12397	78.311	3.439	20	0.388	7212.58	5638.3	8756.93	102.995	3.158	20	0.415	6832.64	3609.03	8915.17	91.975	3.412	20	41	8850.67	4925.95	12832.8	95.711	39.702
21	0.512	6259.88	3872.5	8905.83	83.48	4.203	21	0.374	9374.5	6453.75	13528.5	105.642	3.054	21	0.318	8313.93	6260.99	10424.3	97.765	2.579	21	0.457	6632.5	3755.75	8834	119.745	3.794	21	30	7314.53	1917.42	10876.1	80.218	28.935
22	0.429	5417.68	3682.25	7652.6	90	3.53	22	0.429	9745.62	7485.1	12124.8	17.819	3.516	22	0.388	7238.82	5089	8677.32	105.068	3.206	22	0.706	7310.95	5418.99	9917	24.538	5.896	22	28	8632.25	6758.67	12620.5	164.932	26.926
23	0.429	6704.38	5552.35	7790	109.654	3.498	23	0.443	10769.6	7805.87	14998.4	70.974	3.59	23	0.484	8951.96	5181.67	11363.7	151.928	4.019	23	0.54	7986.98	5100	10927.5	91.507	4.474	23	41	9505.6	5562.5	12817	90	40
24	0.471	6981.54	5705.02	8635.38	107.354	3.906	24	0.415	9806.21	6436.25	12991	106.504	3.386	24	0.318	9064.82	7174.34	10935.3	68.199	2.549	24	0.595	6794.01	4527.16	9532.49	114.102	4.898	24	33	8208.07	6810	10364.1	111.801	32.311
25	0.374	7517.56	6275.5	9000.75	40.365	3.044	25	0.374	9583.19	6014	12990	83.418	3.079	25	0.401	8325.12	6641	9720.54	154.359	3.332	25	0.526	6408.8	5125	8739.34	32.829	4.359	25	39	9092.63	7101.17	11691.5	85.486	37.62
26	0.498	6889.73	5394.51	10618.2	33.69	4.16	26	0.221	12397.4	10523.5	14187.6	56.31	1.73	26	0.332	8889.76	6423.33	10425	94.97	2.755	26	0.761	6792.23	3835.33	10659	102.758	6.349	26	21	9767.92	8068.25	11734.2	40.914	19.912
27	0.554	6829.84	5211.22	8417.41	154.093	4.604	27	0.221	10921.3	8710.75	13384.3	15.945	1.77	27	0.484	7489.1	4569.33	10253.3	96.911	3.945	27	0.401	7611.98	4417	10740.5	94.086	3.244	27	34	9530.09	6835.02	13333.5	36.529	32.901
28	0.304	6959.35	5540.88	8583.14	90	2.412	28	0.415	8114.98	6992.57	10747.5	46.397	3.371	28	0.374	8712.76	6114.67	10485.3	94.399	3.107	28	0.471	6282.3	5098.51	8630.92	107.879	3.888	28	40	9886.31	5986	14461.5	73.856	39.08
29	0.318	7217.28	6388	8570.8	92.726	2.532	29	0.277	8154.09	6918.83	9628.7	98.973	2.215	29	0.471	8073.32	5967.33	11389.4	24.305	3.934	29	0.388	5565.5	4340.82	7661.83	114.624	3.184	29	38	9779.29	7260.5	12994.6	91.548	37.014
30	0.332	6830.65	5223.53	8423.73	77.196	2.654	30	0.332	7357.49	6222.26	9819.39	90	2.647	30	0.512	8402.04	6549.35	10762.7	109.44	4.205	30	0.332	6212.65	3839.88	8513.15	43.264	2.746	30	31	9980.83	7564	13616.7	170.218	29.517

## Sheet: Auxin
MAX_191002_P6AID_ebp2eGFP_A_L2short_9							MAX_191002_P6AID_ebp2eGFP_A_L2short_7							MAX_191002_P6AID_ebp2eGFP_A_L2short_3							MAX_191002_P6AID_ebp2eGFP_A_L2short_11							MAX_191002_P6AID_ebp2eGFP_A_L2short_A5
	Area	Mean	Min	Max	Angle	Length		Area	Mean	Min	Max	Angle	Length		Area	Mean	Min	Max	Angle	Length		Area	Mean	Min	Max	Angle	Length		Area	Mean	Min	Max	Angle	Length
1	0.498	10903.2	7044.16	15098.8	126.87	4.071	1	0.36	8458.58	5076.5	12228.5	90	2.941	1	48	10637.4	7304.5	14346.6	93.652	47.13	1	64	9562.98	4877.68	14261.2	165.303	63.423	1	36	8780.36	6340.9	13391.4	101.634	34.817
2	0.401	9442.69	6471.57	13828.5	63.435	3.341	2	0.443	9303.32	6288.19	11475	149.349	3.642	2	19	8935.02	6807	11866	40.601	18.118	2	51	8300.25	6344.33	11950.2	21.371	49.684	2	33	7778.23	4575	10622.5	167.276	32.164
3	0.567	9645.33	5867.5	14982.9	11.592	4.684	3	0.637	7085.82	4785.5	10301.6	167.196	5.308	3	29	9272.36	7041.8	11568.2	154.359	27.731	3	48	9481.57	6284	12475.3	14.621	47.416	3	23	8051.02	6112	12147.3	95.194	22.142
4	0.208	10650.1	9150.19	12026.5	56.31	1.615	4	0.291	7421.09	5160.15	9902.9	40.914	2.343	4	40	10164.7	5059.76	14882.1	87.064	38.581	4	45	10732.3	7910	14044.1	17.199	43.966	4	23	7622.97	4124	11830.6	6.204	22.142
5	0.872	7934.15	5942.67	12088.4	19.592	7.293	5	0.443	6753.61	5397.98	8040.51	153.435	3.63	5	34	9297.99	6548.55	13047.4	174.806	33.136	5	57	6508.98	5479.7	11746.6	57.995	56.34	5	19	9226.6	5458.57	12224.2	170.538	17.755
6	0.318	10607.5	6744	14918.7	146.31	2.545	6	0.595	8278.93	6593.96	12013.3	8.326	4.933	6	38	9453.41	6251	12965.5	90	37	6	30	7865.16	6245.89	11124.9	165.964	28.862	6	32	7472.19	5652.42	10419.9	116.565	30.859
7	0.54	10056.1	7566.17	14635.1	18.435	4.483	7	0.346	9412.21	5606	14224.2	124.992	2.859	7	45	8655.84	6398.91	11866	95.194	44.181	7	45	7352.45	5318.49	12399.2	158.199	43.546	7	16	7951.15	6242.89	9283.67	45	15.207
8	0.581	11311.1	6284	15380.5	18.435	4.855	8	0.415	9612.86	7291.91	13207.2	102.095	3.369	8	27	8409.75	6258.45	11317	57.529	25.656	8	55	8127.51	5893.94	11756.5	32.229	54.378	8	14	7079.53	5690.86	9751.93	135	13.435
9	0.36	11713.6	9303.44	15813	126.87	2.931	9	0.304	7505.22	5608.2	11341.5	127.405	2.435	9	11	8663.58	7672.73	10768.5	143.13	10.124	9	28	7195.11	6224.06	9364.69	164.932	26.58	9	30	6585.78	5180.86	9262.93	97.853	29.347
10	0.318	9561.58	8095.5	13200.2	135	2.621	10	0.346	9967.63	7255.44	13590.6	118.61	2.869	10	42	6808.71	5203.22	9504	11.31	40.893	10	26	9394.99	6079.59	11764.8	113.499	25.283	10	27	7440.86	5613	9802.42	10.886	26.476
11	0.318	8903.53	6655.93	11881.5	105.945	2.554	11	0.388	9760.83	6064.55	13887.6	72.255	3.162	11	39	8706.13	6462.9	12075	98.973	37.977	11	34	7517.28	5243.18	10911.7	102.339	32.757	11	19	8835.93	5733.81	13670	100.008	17.755
12	1.052	8978.87	6309.59	14640	24.507	8.87	12	0.484	10022.5	6742	13293.5	13.627	3.981	12	44	8954.59	4445.19	13910	7.943	43.35	12	22	8973.19	6280	12482.1	140.906	20.616	12	24	7848.79	5895.25	9556.35	52.125	23.2
13	0.277	11417	6190.54	15324.9	47.121	2.205	13	0.304	9594.87	5559.84	13885.1	157.166	2.449	13	42	8668.73	6298	13266.7	94.185	41.11	13	23	6940.82	5750.4	9112.59	160.71	21.662	13	15	9565.98	5625.5	12072.5	63.435	14.089
14	0.457	10450.3	6624	14866.2	157.521	3.769	14	0.443	8426.64	5433	12976.4	132.397	3.669	14	20	8742.53	5076.5	12165.9	132.879	19.474	14	36	9227.59	6269.06	13477.2	23.629	35.387	14	53	9419.53	5600	13816.4	21.595	51.624
15	0.401	9565.51	6335	12408.5	19.093	3.293	15	0.277	8207.25	6189.51	10321.3	120.466	2.24	15	43	8046.13	5934.35	10520.2	159.444	42.252	15	21	7147.43	5292	9195.08	113.962	20.359	15	32	9126.76	5500	11279.3	16.699	31.321
16	0.263	11342.8	6473.5	15981.3	144.462	2.072	16	0.332	8571.3	6918.91	10575.8	7.431	2.67	16	20	9349.07	8239.7	11646	145.491	19.138	16	26	9661.76	6687.26	13015.5	149.421	25.387	16	20	7832.33	5352.5	12070.2	168.111	19.416
17	0.36	12719.5	8277.25	16021.2	31.759	2.937	17	0.429	6964.8	4472.5	9327.84	144.689	3.475	17	33	9229.53	6820.6	13863.7	97.352	31.753	17	40	9219.88	7053.93	13408.2	52.253	39.205	17	26	7964.8	5220	12058.4	78.69	25.495
18	0.388	8171.94	5164.62	11569.4	8.427	3.162	18	0.401	8381.51	5293	10909.4	10.125	3.346	18	43	8901.59	6382.36	13040.6	94.086	41.647	18	31	9286.03	6763.53	13012.1	66.038	29.547	18	22	9523.75	8405.82	10956.2	104.036	21.225
19	0.263	8889.52	7183.26	12852.1	139.399	2.169	19	0.484	8885.22	5672.27	14721.9	6.71	4.028	19	23	8035.55	6210.67	9517.72	26.565	22.361	19	20	8544.81	6339.75	11603.9	42.879	19.092	19	30	10305.5	6844.72	13197.6	92.045	28.539
20	0.235	10901.3	6682	14687.9	161.565	1.86	20	0.277	8652.46	5970	10421.7	93.013	2.238	20	26	9231.88	6378.13	12824.1	106.26	24.865	20	29	7845.09	5693.5	12786.2	167.905	28.258	20	17	8861.77	5340	13498.2	29.745	15.953
21	0.526	6603.12	3998.5	11367.8	117.255	4.341	21	0.318	7759.26	4529.75	11270.3	158.199	2.611	21	34	11253.3	7897.5	13926	162.646	33.049	21	16	7411.22	5787	8618.8	97.595	15.133	21	28	6554.27	5418.86	10382.5	31.329	26.926
22	0.249	7798.08	5947.19	9389.41	86.634	2.001	22	0.318	7300.66	5807.63	8581.34	129.472	2.591	22	24	9792.14	7192.38	13246.5	153.435	23.033	22	42	8555.99	6273.92	11784.7	41.055	41.488	22	32	8576.79	6899.26	11314.3	159.228	31.016
23	0.401	7078.69	3991.5	10879.2	161.565	3.293	23	0.318	6751.56	5292	10481	147.724	2.644	23	21	10843.3	7859.35	15440.7	95.711	20.056	23	32	10106.6	7631.27	14585.4	65.095	31.325	23	27	9972.52	5388.5	13764.4	173.418	26.12
24	0.457	10306.6	7030.5	14299.9	102.339	3.796	24	0.443	7991.41	5362.26	10882.8	120.651	3.642	24	33	7531.04	5994.91	11464.8	86.424	32.035	24	21	10730.4	8446	12913.6	98.531	20.304	24	33	8651.18	5774.51	11639	43.727	32.175
25	0.457	9902.81	6339	14143.4	174.644	3.781	25	0.36	8251.71	5528	12368.3	36.87	2.906	25	22	7535.26	6432.4	9647.1	81.469	20.718	25	32	5225.52	3326.84	8327.92	10.954	30.992	25	14	8324.76	6408.5	9748.85	85.601	12.54
26	0.263	9081.78	6140	11799	160.56	2.121	26	0.277	7447.68	5672.79	10566.3	156.038	2.264	26	28	10438.9	7473.59	14454.5	90	27.005	26	43	9030.03	6815.5	11714.2	47.911	42.479	26	39	8113.65	5516.9	13185.6	178.493	38.003
27	0.346	10564.8	7310.08	14720.6	14.621	2.796	27	0.429	7781.47	5350	9965.85	168.311	3.554	27	31	8487	4746.25	13985.1	29.982	30.017	27	45	8197.62	4596.19	13647.1	169.461	43.832	27	23	7801.8	5852.6	10465.6	125.218	21.506
28	0.54	7651.79	5670.26	13025.4	4.514	4.49	28	0.429	10189.4	7733.1	13661.6	84.289	3.553	28	17	7850.24	6194.02	9558.61	108.435	16.286	28	20	10003.4	7001.5	13595.9	130.601	18.822	28	25	7312.29	5516	11258	80.538	24.331
29	0.664	9703.43	6535	14002.7	16.113	5.511	29	0.249	8883.87	5811.59	13293.5	144.462	1.942	29	10	7481.32	5407.61	10623.5	63.435	9.179	29	33	8842.94	6825.9	11191	20.136	32.257	29	34	8111.62	6392.64	11836.5	19.537	32.894
30	0.36	8373.97	3977	14217.5	96.843	2.962	30	0.332	10311	6991.46	14597.4	12.804	2.699	30	20	9192.77	6941.33	11274.7	152.103	19.235	30	13	10526.7	8607.11	12677.7	109.983	11.705	30	19	10262.9	8358.81	12289.8	40.601	17.734

## Sheet: Angles to radiants
Control	Auxin				Control	Auxin
9.462	4.514		3.14159		0.165143	0.0787842										150
15.945	6.204				0.278293	0.10828
17.819	6.71				0.311	0.117112
17.969	7.431				0.313618	0.129695
24.305	7.943				0.424202	0.138632
24.538	8.326				0.428269	0.145316
25.71	8.427				0.448724	0.147079
29.358	10.125				0.512394	0.176715
32.829	10.886				0.572974	0.189997
33.69	10.954				0.588001	0.191183
33.69	11.31				0.588001	0.197397
36.529	11.592				0.637551	0.202319
36.634	12.804				0.639384	0.223472
38.418	13.627				0.670521	0.237836
40.365	14.621				0.704502	0.255185
40.601	14.621				0.708621	0.255185
40.914	16.113				0.714084	0.281225
43.264	16.699				0.755099	0.291453
46.397	17.199				0.80978	0.300179
47.603	18.435				0.830829	0.321751
47.726	18.435				0.832976	0.321751
53.13	19.093				0.927293	0.333236
54.246	19.537				0.946771	0.340985
55.305	19.592				0.965254	0.341945
56.31	20.136				0.982795	0.351439
58.241	21.371				1.0165	0.372994
58.57	21.595				1.02224	0.376904
60.255	23.629				1.05165	0.412404
60.524	24.507				1.05634	0.427728
61.113	26.565				1.06662	0.463647
64.179	29.745				1.12013	0.519148
66.975	29.982				1.16893	0.523285
68.199	31.329				1.1903	0.546794
70.346	31.759				1.22777	0.554299
70.974	32.229				1.23873	0.562502
70.974	36.87				1.23873	0.643503
72.759	40.601				1.26988	0.708621
73.072	40.601				1.27535	0.708621
73.74	40.914				1.28701	0.714084
73.856	41.055				1.28903	0.716545
75.964	42.879				1.32582	0.74838
76.759	43.727				1.3397	0.76318
77.196	45				1.34732	0.785398
78.311	47.121				1.36678	0.822417
78.69	47.911				1.3734	0.836205
78.69	52.125				1.3734	0.909753
80.218	52.253				1.40007	0.911987
80.538	56.31				1.40565	0.982795
80.538	57.529				1.40565	1.00407
80.838	57.995				1.41089	1.0122
82.147	63.435				1.43374	1.10715
83.418	63.435				1.45592	1.10715
83.48	63.435				1.457	1.10715
83.66	65.095				1.46014	1.13612
84.958	66.038				1.4828	1.15258
85.486	72.255				1.49201	1.26109
86.309	78.69				1.50638	1.3734
87.138	80.538				1.52085	1.40565
87.397	81.469				1.52537	1.4219
88.363	84.289				1.54223	1.47112
90	85.601				1.5708	1.49402
90	86.424				1.5708	1.50838
90	86.634				1.5708	1.51205
90	87.064				1.5708	1.51955
90	90				1.5708	1.5708
90	90				1.5708	1.5708
90	90				1.5708	1.5708
90	92.045				1.5708	1.60649
90	93.013				1.5708	1.62338
91.507	93.652				1.5971	1.63454
91.548	94.086				1.59781	1.64211
91.548	94.185				1.59781	1.64384
91.975	95.194				1.60527	1.66145
92.386	95.194				1.61244	1.66145
92.726	95.711				1.61837	1.67047
92.862	96.843				1.62075	1.69023
94.086	97.352				1.64211	1.69911
94.185	97.595				1.64384	1.70335
94.399	97.853				1.64757	1.70786
94.97	98.531				1.65754	1.71969
95.528	98.973				1.66728	1.7274
95.711	100.008				1.67047	1.74547
95.856	101.634				1.673	1.77385
95.906	102.095				1.67388	1.78189
96.009	102.339				1.67567	1.78615
96.203	102.339				1.67906	1.78615
96.911	104.036				1.69142	1.81577
96.911	105.945				1.69142	1.84909
97.765	106.26				1.70632	1.85459
98.973	108.435				1.7274	1.89255
99.162	109.983				1.7307	1.91957
99.462	113.499				1.73594	1.98093
100.954	113.962				1.76198	1.98901
101.31	116.565				1.76819	2.03444
101.976	117.255				1.77982	2.04649
102.758	118.61				1.79347	2.07014
102.995	120.466				1.7976	2.10253
104.036	120.651				1.81577	2.10576
104.036	124.992				1.81577	2.18152
104.036	125.218				1.81577	2.18547
105.068	126.87				1.83378	2.2143
105.642	126.87				1.8438	2.2143
105.751	127.405				1.8457	2.22364
106.189	129.472				1.85335	2.25971
106.504	130.601				1.85885	2.27942
107.354	132.397				1.87368	2.31076
107.447	132.879				1.8753	2.31918
107.879	135				1.88284	2.35619
108.435	135				1.89255	2.35619
109.359	139.399				1.90867	2.43297
109.44	140.906				1.91009	2.45927
109.537	143.13				1.91178	2.49809
109.654	144.462				1.91382	2.52134
110.556	144.462				1.92957	2.52134
111.801	144.689				1.9513	2.5253
114.102	145.491				1.99146	2.5393
114.444	146.31				1.99742	2.55359
114.444	147.724				1.99742	2.57827
114.624	149.349				2.00057	2.60663
114.775	149.421				2.0032	2.60789
115.346	152.103				2.01317	2.6547
115.56	153.435				2.0169	2.67795
115.641	153.435				2.01832	2.67795
116.565	154.359				2.03444	2.69407
117.759	156.038				2.05528	2.72338
118.443	157.166				2.06722	2.74306
118.61	157.521				2.07014	2.74926
119.249	158.199				2.08129	2.76109
119.745	158.199				2.08994	2.76109
120.7	159.228				2.10661	2.77905
125.538	159.444				2.19105	2.78282
128.66	160.56				2.24554	2.8023
136.736	160.71				2.38649	2.80492
140.389	161.565				2.45025	2.81984
140.906	161.565				2.45927	2.81984
143.973	162.646				2.5128	2.83871
146.725	164.932				2.56083	2.87861
151.26	165.303				2.63999	2.88508
151.928	165.964				2.65164	2.89662
154.093	167.196				2.68943	2.91812
154.359	167.276				2.69407	2.91952
156.371	167.905				2.72919	2.9305
161.03	168.111				2.8105	2.93409
161.565	168.311				2.81984	2.93758
162.474	169.461				2.83571	2.95765
163.61	170.538				2.85553	2.97645
164.932	173.418				2.87861	3.02672
165.466	174.644				2.88793	3.04811
169.919	174.806				2.96565	3.05094
170.218	178.493				2.97086	3.11529
