# Supplementary material for: Epidermal PAR-6 and PKC-3 are essential for larval development of C. elegans and organize non-centrosomal microtubules
Source: eLife journal article supplement (doi:10.7554/elife.62067), 2020-12-10
Supplement: fig5-data1 [file Directionality.xlsx]

## Sheet: Sheet1
Angle					Angle
Control	Auxin				Control	Auxin
90	90.707		3.14159		1.5708	1.58314
90	96.582				1.5708	1.68567
91.548	82.972				1.59781	1.44813
89.119	91.507				1.55542	1.5971
93.879	90				1.6385	1.5708
78.179	90.855				1.36448	1.58572
95.711	91.569				1.67047	1.59818
138.447	93.136				2.41636	1.62553
90	90.843				1.5708	1.58551
86.634	86.424				1.51205	1.50838
67.557	90				1.17909	1.5708
104.036	93.18				1.81577	1.6263
110.556	90.855				1.92957	1.58572
97.326	91.79				1.69866	1.60204
60.642	92.684				1.0584	1.61764
103.536	96.009				1.80704	1.67567
89.182	91.488				1.55652	1.59677
87.089	91.614				1.51999	1.59897
86.121	90				1.5031	1.5708
95.013	90				1.65829	1.5708
98.881	90.868				1.7258	1.58595
94.205	90.807				1.64419	1.58488
90	92.684				1.5708	1.61764
89.246	94.927				1.55764	1.65679
90.895	90				1.58642	1.5708
108.435	90.909				1.89255	1.58666
110.353	89.226				1.92602	1.55729
90.735	92.454				1.58362	1.61363
93.013	93.972				1.62338	1.64012
95.648	89.145				1.66937	1.55587
101.182	88.091				1.76596	1.53748
108.048	90				1.88579	1.5708
85.03	86.055				1.48405	1.50194
87.274	93.122				1.52322	1.62529
95.315	96.843				1.66356	1.69023
96.953	94.086				1.69215	1.64211
90	84.472				1.5708	1.47431
128.66	86.878				2.24554	1.51631
91.193	92.603				1.59162	1.61623
92.603	79.919				1.61623	1.39485
94.145	96.459				1.64314	1.68353
109.537	95.024				1.91178	1.65848
94.399	95.412				1.64757	1.66525
90	98.973				1.5708	1.7274
90.939	91.975				1.58718	1.60527
90	86.496				1.5708	1.50964
100.981	88.768				1.76245	1.54929
99.605	95.024				1.73844	1.65848
92.911	90				1.6216	1.5708
96.71	90				1.68791	1.5708
91.591	94.635				1.59856	1.65169
93.136	87.93				1.62553	1.53467
94.467	93.215				1.64876	1.62691
100.305	102.458				1.75065	1.78823
95.793	87.537				1.6719	1.52781
96.613	85.962				1.68621	1.50032
96.843	95.262				1.69023	1.66264
106.06	94.83				1.8511	1.6551
101.143	96.089				1.76528	1.67707
90	98.746				1.5708	1.72344
92.353	91.023				1.61186	1.58865
94.028	89.045				1.6411	1.55413
83.48	87.563				1.457	1.52826
94.399	80.789				1.64757	1.41003
92.49	95.599				1.61426	1.66852
94.332	96.654				1.6464	1.68693
90	91.469				1.5708	1.59644
92.643	96.633				1.61693	1.68656
87.436	90				1.52605	1.5708
77.619	90				1.35471	1.5708
97.927	88.409				1.70915	1.54303
90	96.557				1.5708	1.68524
90	90				1.5708	1.5708
99.593	95.711				1.73823	1.67047
90.61	90.807				1.58144	1.58488
93.225	90				1.62708	1.5708
93.27	92.603				1.62787	1.61623
106.113	90				1.85202	1.5708
90	88.877				1.5708	1.5512
87.274	90				1.52322	1.5708
90.666	90				1.58242	1.5708
85.544	98.13				1.49302	1.71269
92.148	77.905				1.60829	1.3597
72.688	93.576				1.26864	1.63321
87.138	90				1.52085	1.5708
87.357	90				1.52467	1.5708
99.605	97.853				1.73844	1.70786
97.028	97.125				1.69346	1.69515
101.023	85.236				1.76318	1.48765
89.012	88.025				1.55355	1.53633
90	79.114				1.5708	1.3808
102.529	90				1.78947	1.5708
92.322	90				1.61132	1.5708
92.231	87.955				1.60973	1.5351
87.678	90				1.53027	1.5708
94.399	90				1.64757	1.5708
92.095	118.301				1.60736	2.06474
90	91.219				1.5708	1.59207
82.942	96.17				1.44761	1.67848
95.886	90				1.67353	1.5708
