# Supplementary material for: Epidermal PAR-6 and PKC-3 are essential for larval development of C. elegans and organize non-centrosomal microtubules
Source: eLife journal article supplement (doi:10.7554/elife.62067), 2020-12-10
Supplement: fig5-data1 [file Microtubule growth rate in hyp7 1 to 2 hours.xlsx]

## Sheet: Control L1 animal 1
																Mean speed										Average mean speed
Track_1206	11	1	1	0	0	0	11704	0	11704	1289	1	1	66420	28627	0	0.344	0.802	0.027	0.311	0.237	288797	441548	204263	292328	65683	0.368576
Track_1209	11	1	1	0	0	0	11704	0	11704	0.463	4	4	64608	27759	0	0.254	0.411	0.056	0.304	0.124	444349	627829	232589	452766	137285
Track_1211	11	0	0	0	0	0	10640	0	10640	0.476	6	6	84533	39518	0	0.275	0.615	0.088	0.269	0.147	968204	1032317	907840	981151	43030
Track_1214	15	0	0	0	0	0	14896	0	14896	2398	9	9	53073	26572	0	0.272	0.804	0.025	0.227	0.206	398248	666459	228619	375637	143102
Track_1220	11	1	1	0	0	0	11704	0	11704	0.117	15	15	73165	29798	0	0.317	0.835	0.11	0.284	0.22	414501	779332	214429	355806	181522
Track_1224	23	0	0	0	0	0	23408	0	23408	2536	19	19	84279	54602	0	0.395	0.899	0.029	0.362	0.211	393429	660724	212532	383394	119121
Track_1225	27	0	0	0	0	0	27664	0	27664	2933	20	20	84033	54246	0	0.352	0.886	0.038	0.297	0.214	390355	685046	219508	368426	121300
Track_1227	14	0	0	0	0	0	13832	0	13832	2161	22	22	50197	25332	0	0.289	0.64	0.064	0.272	0.176	378557	548220	209099	384101	98267
Track_1228	14	2	1	0	0	0	15960	0	15960	1169	23	23	83944	46291	0	0.27	0.709	0.061	0.275	0.17	379760	665708	201418	344609	143157
Track_1238	10	1	1	0	0	0	10640	0	10640	1282	33	33	82154	63664	0	0.429	0.738	0.106	0.433	0.22	302439	432286	212831	314601	78590
Track_1242	18	1	1	0	0	0	19152	0	19152	2636	37	37	55210	26254	0	0.245	0.542	0.087	0.184	0.139	381864	578066	246638	369944	100914
Track_1272	17	0	0	0	0	0	17024	2128	19152	2714	67	67	82201	39928	0	0.295	0.635	0.075	0.238	0.202	343772	545142	208444	336282	102851
Track_1280	25	1	1	0	0	0	26600	5320	31920	2685	75	75	72321	31844	0	0.271	0.562	0.028	0.28	0.152	386359	675125	216859	373967	108867
Track_1286	15	0	0	0	0	0	14896	3192	18088	2391	81	81	78702	37177	0	0.347	0.617	0.089	0.317	0.152	411165	631184	240109	401286	131946
Track_1292	21	2	1	0	0	0	23408	3192	26600	3027	87	87	58787	25073	0	0.302	0.904	0.045	0.271	0.239	345330	842651	200950	262047	169413
Track_1293	34	0	0	0	0	0	35112	3192	38304	1017	88	88	83604	64051	0	0.299	0.916	0.046	0.245	0.198	478687	798712	216994	482312	131075
Track_1300	15	2	1	0	0	0	17024	6384	23408	0.961	95	95	62979	24419	0	0.33	0.722	0.095	0.26	0.213	352611	695605	200832	252552	156600
Track_1302	18	1	1	0	0	0	19152	6384	25536	1321	97	97	84065	61369	0	0.358	0.791	0.076	0.309	0.192	402513	710901	217892	361420	147453
Track_1304	16	1	1	0	0	0	17024	6384	23408	1701	99	99	85928	49397	0	0.298	0.917	0.071	0.23	0.228	302982	471917	204783	326236	77265
Track_1305	19	1	1	0	0	0	20216	6384	26600	2338	100	100	82885	72631	0	0.357	0.667	0.027	0.355	0.187	385091	679119	204652	373852	113861
Track_1306	12	2	1	0	0	0	13832	6384	20216	1043	101	101	74014	32626	0	0.231	0.377	0.06	0.237	0.112	297884	458786	221148	268191	78642
Track_1324	11	0	0	0	0	0	10640	9576	20216	1011	119	119	80716	40051	0	0.23	0.677	0.067	0.224	0.195	353894	498208	236141	352010	93993
Track_1328	21	0	0	0	0	0	21280	8512	29792	0.907	123	123	65741	28337	0	0.327	0.829	0.015	0.254	0.267	354809	548047	221577	327334	87067
Track_1329	16	0	0	0	0	0	15960	9576	25536	1050	124	124	83330	42973	0	0.244	0.831	0.016	0.118	0.247	293594	483145	200365	290982	70269
Track_1336	15	0	0	0	0	0	14896	11704	26600	2438	131	131	64998	25571	0	0.366	0.91	0.072	0.345	0.22	443519	701871	217086	434296	136832
Track_1337	12	0	0	0	0	0	11704	11704	23408	0.809	132	132	77655	34519	0	0.328	0.878	0.093	0.233	0.247	461329	602869	240782	454741	95494
Track_1338	31	0	0	0	0	0	31920	11704	43624	1024	133	133	77239	35690	0	0.371	0.888	0.094	0.292	0.228	367550	622230	202930	363571	110273
Track_1340	13	0	0	0	0	0	12768	11704	24472	1040	135	135	84939	56825	0	0.297	0.777	0.005	0.201	0.282	317976	403809	200966	340519	60468
Track_1344	26	1	1	0	0	0	27664	12768	40432	0.818	139	139	74557	32860	0	0.341	0.735	0.035	0.299	0.185	377406	815174	202493	345227	161504
Track_1349	11	1	1	0	0	0	11704	12768	24472	1166	144	144	70535	27252	0	0.261	0.663	0.025	0.208	0.183	352267	577135	217031	309575	94992
Track_1353	16	0	0	0	0	0	15960	13832	29792	0.948	148	148	84469	41321	0	0.287	0.729	0.047	0.229	0.215	391328	724930	204064	415663	154504
Track_1357	14	1	1	0	0	0	14896	13832	28728	1723	152	152	71514	29023	0	0.37	0.779	0.035	0.293	0.276	367697	648294	211597	362861	135661
Track_1360	21	0	0	0	0	0	21280	14896	36176	2959	155	155	56152	25090	0	0.277	0.67	0.047	0.265	0.149	398567	571642	205076	409509	104030
Track_1362	17	1	1	0	0	0	18088	14896	32984	1926	157	157	81957	72104	0	0.33	0.847	0.081	0.275	0.207	407062	650148	243407	398130	116986
Track_1363	11	0	0	0	0	0	10640	14896	25536	1863	158	158	64002	24678	0	0.219	0.484	0.027	0.224	0.142	486577	610213	250704	481831	102080
Track_1366	27	2	1	0	0	0	29792	14896	44688	1598	161	161	51932	27366	0	0.364	0.892	0.045	0.32	0.23	294015	474977	201793	301191	73366
Track_1368	25	0	0	0	0	0	25536	14896	40432	3243	163	163	48658	26906	0	0.291	0.817	0.104	0.251	0.18	337471	598147	202291	340821	91577
Track_1369	24	0	0	0	0	0	24472	14896	39368	1645	164	164	70299	30239	0	0.27	0.673	0.045	0.233	0.18	352633	669519	205212	316408	123930
Track_1371	26	0	0	0	0	0	26600	14896	41496	3191	166	166	83863	62551	0	0.249	0.627	0.057	0.22	0.158	398382	638171	215479	414491	93463
Track_1373	14	0	0	0	0	0	13832	14896	28728	2364	168	168	84599	59364	0	0.256	0.786	0.088	0.205	0.176	410959	642266	281782	390309	103092
Track_1374	25	2	1	0	0	0	27664	14896	42560	3668	169	169	52529	25936	0	0.304	0.716	0.047	0.342	0.167	371885	686558	200792	362824	119209
Track_1385	12	0	0	0	0	0	11704	17024	28728	2461	180	180	82980	46565	0	0.344	0.65	0.098	0.361	0.135	386979	510031	234807	385032	90375
Track_1388	11	0	0	0	0	0	10640	17024	27664	2081	183	183	60242	24801	0	0.247	0.418	0.105	0.272	0.102	426222	708008	224253	484498	163167
Track_1392	21	1	1	0	0	0	22344	18088	40432	3545	187	187	84259	54416	0	0.268	0.638	0.031	0.273	0.156	375852	553007	201689	361648	100370
Track_1397	12	1	1	0	0	0	12768	18088	30856	1264	192	192	82762	63679	0	0.356	0.619	0.104	0.324	0.162	338110	529067	210984	348085	92522
Track_1398	20	0	0	0	0	0	20216	18088	38304	1254	193	193	83528	60902	0	0.271	0.784	0.027	0.23	0.186	324878	469241	216586	329188	71983
Track_1399	20	0	0	0	0	0	20216	19152	39368	2606	194	194	83085	66907	0	0.312	0.583	0.088	0.329	0.15	432144	670139	224542	428137	128366
Track_1410	13	0	0	0	0	0	12768	20216	32984	0.393	205	205	84269	39380	0	0.214	0.423	0.048	0.209	0.122	315759	402826	210893	308745	45282
Track_1413	11	0	0	0	0	0	10640	20216	30856	1803	208	208	48004	27202	0	0.261	0.707	0.055	0.2	0.19	376830	794672	212532	311306	169070
Track_1417	15	0	0	0	0	0	14896	20216	35112	2645	212	212	69063	27023	0	0.325	0.515	0.16	0.327	0.117	417494	638600	200283	430145	144309
Track_1418	17	2	1	0	0	0	19152	20216	39368	2819	213	213	49840	26435	0	0.239	0.597	0.063	0.22	0.143	362858	568199	221665	357924	103414
Track_1423	18	2	1	0	0	0	20216	21280	41496	2091	218	218	80166	36185	0	0.398	0.904	0.12	0.329	0.237	327080	498816	205920	311730	83227
Track_1426	12	0	0	0	0	0	11704	22344	34048	0.841	221	221	60120	27216	0	0.243	0.622	0.043	0.22	0.178	331492	548138	200165	311791	120470
Track_1433	15	0	0	0	0	0	14896	22344	37240	1250	228	228	79259	37597	0	0.298	0.724	0.08	0.317	0.184	304965	441133	201257	304250	59952
Track_1440	12	1	1	0	0	0	12768	23408	36176	1162	235	235	51098	25420	0	0.229	0.511	0.068	0.185	0.134	387787	533880	275229	361901	72724
Track_1445	12	0	0	0	0	0	11704	25536	37240	2067	240	240	65237	26587	0	0.303	0.457	0.043	0.349	0.142	378173	622261	234568	383652	115131
Track_1447	25	3	1	0	0	0	28728	25536	54264	0.917	242	242	83949	57842	0	0.252	0.517	0.006	0.279	0.157	261072	361288	203594	251636	40385
Track_1458	22	0	0	0	0	0	22344	27664	50008	2891	253	253	82699	69344	0	0.337	0.802	0.114	0.273	0.207	358211	546407	216732	375383	85689
Track_1464	14	1	1	0	0	0	14896	27664	42560	0.295	259	259	84529	39931	0	0.227	0.482	0.049	0.223	0.124	559105	803582	238007	717526	219947
Track_1465	13	0	0	0	0	0	12768	27664	40432	2316	260	260	67642	26631	0	0.325	0.492	0.062	0.343	0.121	356529	531477	250558	333731	86010
Track_1473	20	1	1	0	0	0	21280	28728	50008	3841	268	268	84378	53341	0	0.331	0.76	0.072	0.341	0.172	442923	731289	203894	412012	159697
Track_1474	19	0	0	0	0	0	19152	28728	47880	3024	269	269	85281	49322	0	0.347	0.689	0.116	0.326	0.174	419419	675898	223891	391388	150016
Track_1497	13	3	1	0	0	0	15960	32984	48944	2740	292	292	85737	52923	0	0.311	0.593	0.107	0.28	0.159	365110	537075	221121	337201	88870
Track_1503	11	0	0	0	0	0	10640	32984	43624	0.514	298	298	81203	38161	0	0.355	0.692	0.105	0.352	0.168	436075	753360	216564	389891	169496
Track_1506	24	1	1	0	0	0	25536	34048	59584	2047	301	301	83768	41532	0	0.33	0.869	0.043	0.277	0.23	329622	520347	200839	338388	88759
Track_1511	17	0	0	0	0	0	17024	35112	52136	2662	306	306	83627	60459	0	0.343	0.689	0.104	0.363	0.15	440761	813965	249351	394697	165912
Track_1513	21	0	0	0	0	0	21280	36176	57456	3571	308	308	75289	31948	0	0.323	0.801	0.042	0.277	0.23	440223	869929	214273	402870	150831
Track_1515	13	1	1	0	0	0	13832	36176	50008	0.422	310	310	72945	32235	0	0.349	0.694	0.017	0.389	0.198	300257	411052	208685	301846	69620
Track_1532	15	2	1	0	0	0	17024	40432	57456	1810	327	327	74145	28928	0	0.338	0.913	0.024	0.293	0.251	418641	659376	206256	407089	145708
Track_1533	11	1	1	0	0	0	11704	40432	52136	0.723	328	328	83215	61233	0	0.352	0.799	0.073	0.27	0.22	337229	489326	248655	318793	86785
Track_1538	10	1	1	0	0	0	10640	41496	52136	1025	333	333	70058	28726	0	0.205	0.306	0.029	0.247	0.108	373123	541472	222938	360400	105456
Track_1550	19	2	1	0	0	0	21280	42560	63840	3770	345	345	84602	64571	0	0.336	0.771	0.045	0.352	0.196	302463	423917	216479	309419	62723
Track_1551	10	1	1	0	0	0	10640	42560	53200	1208	346	346	64509	24480	0	0.244	0.527	0.007	0.207	0.149	349082	562254	226625	317655	116215
Track_1552	15	0	0	0	0	0	14896	42560	57456	1151	347	347	76739	32692	0	0.283	0.838	0.074	0.216	0.211	420888	688520	202952	426041	137420
Track_1553	13	1	1	0	0	0	13832	42560	56392	1285	348	348	56149	23613	0	0.201	0.717	0.033	0.134	0.187	355150	573611	230442	334090	86888
Track_1562	15	2	1	0	0	0	17024	43624	60648	0.833	357	357	83701	68148	0	0.339	0.806	0.106	0.292	0.194	376139	748357	237970	317946	130921
Track_1563	18	2	1	0	0	0	20216	43624	63840	3191	358	358	71520	31352	0	0.352	0.799	0.18	0.295	0.161	268413	440649	200415	251909	61129
Track_1564	20	0	0	0	0	0	20216	43624	63840	4185	359	359	83342	64042	0	0.351	0.708	0.077	0.31	0.204	357418	482858	208829	367204	75928
Track_1565	10	1	1	0	0	0	10640	43624	54264	1082	360	360	78281	34811	0	0.184	0.446	0.004	0.174	0.13	352321	636934	201637	360077	124552
Track_1567	16	0	0	0	0	0	15960	44688	60648	2222	362	362	49540	24239	0	0.247	0.357	0.065	0.268	0.079	384489	557302	206503	381950	94152
Track_1578	10	1	1	0	0	0	10640	45752	56392	1471	373	373	72783	28194	0	0.319	0.768	0.022	0.261	0.264	266494	384462	218202	256721	47864
Track_1579	16	1	1	0	0	0	17024	45752	62776	0.334	374	374	73795	32615	0	0.333	0.59	0.132	0.34	0.159	277585	369380	225075	265549	38009
Track_1581	11	0	0	0	0	0	10640	45752	56392	0.587	376	376	81956	72581	0	0.26	0.747	0.057	0.252	0.216	393713	631577	228823	372966	111361
Track_1587	16	1	1	0	0	0	17024	46816	63840	0.53	382	382	83333	50249	0	0.317	0.624	0.009	0.302	0.176	329659	481121	215804	329923	78740
Track_1594	17	0	0	0	0	0	17024	46816	63840	0.549	389	389	83508	43937	0	0.331	0.856	0.017	0.328	0.216	258759	303068	213584	254712	24900
Track_1597	13	0	0	0	0	0	12768	46816	59584	2139	392	392	79973	39506	0	0.284	0.717	0.128	0.24	0.161	357663	566841	234793	338863	111009
Track_1598	16	0	0	0	0	0	15960	47880	63840	3266	393	393	56559	25851	0	0.277	0.606	0.107	0.215	0.165	392441	593895	205399	405823	106251
Track_1606	11	0	0	0	0	0	10640	50008	60648	1852	401	401	59712	27061	0	0.245	0.601	0.072	0.242	0.145	425429	649226	214817	435255	130718
Track_1607	14	0	0	0	0	0	13832	50008	63840	2543	402	402	51710	25721	0	0.3	0.525	0.121	0.292	0.124	369519	501942	231657	378117	79593
Track_1617	11	0	0	0	0	0	10640	53200	63840	2217	412	412	59685	24202	0	0.312	0.679	0.1	0.247	0.199	375528	558349	264168	351415	86470
Track_1619	11	0	0	0	0	0	10640	53200	63840	1838	414	414	84930	50575	0	0.337	0.647	0.168	0.33	0.139	386098	573741	214515	356747	112928
Track_108	12	1	1	0	0	0	12768	0	12768	0.634	108	108	56256	24970	0	0.555	0.87	0.307	0.515	0.185	79034	158003	9913	83796	44839
Track_110	60	1	1	0	0	0	63840	0	63840	5925	110	110	83310	39717	0	0.376	1127	0.029	0.35	0.242	200648	511803	18174	180459	128325
Track_112	19	0	0	0	0	0	19152	0	19152	0.918	112	112	55555	24932	0	0.446	0.846	0.074	0.474	0.215	149039	578066	34925	103582	138119
Track_113	10	0	0	0	0	0	9576	0	9576	1423	113	113	56922	24800	0	0.533	1008	0.121	0.566	0.318	116519	165857	35003	121527	43958
Track_114	60	1	1	0	0	0	63840	0	63840	1674	114	114	62136	26222	0	0.36	0.965	0.018	0.34	0.203	141616	695605	0.527	113901	118847
Track_115	15	0	0	0	0	0	14896	0	14896	2464	115	115	65236	25816	0	0.446	0.745	0.097	0.506	0.239	208941	701871	16091	161935	166636
Track_116	11	0	0	0	0	0	10640	0	10640	0.248	116	116	79681	33545	0	0.461	0.869	0.2	0.499	0.235	99071	175280	38051	85714	46854
Track_117	57	3	2	0	0	0	63840	0	63840	3281	117	117	60058	25095	0	0.42	1110	0.072	0.391	0.245	128585	480647	13577	103203	94930
Track_118	61	0	0	0	0	0	63840	0	63840	2204	118	118	61361	25059	0	0.366	1032	0.05	0.328	0.232	136861	381054	13295	123082	88547
Track_119	27	0	0	0	0	0	27664	0	27664	2533	119	119	74267	32392	0	0.43	0.959	0.06	0.372	0.269	199331	453053	5524	176993	112885
Track_120	26	0	0	0	0	0	26600	0	26600	0.906	120	120	82951	39117	0	0.443	0.867	0.095	0.465	0.245	155045	542080	18979	132009	138243
Track_121	59	1	2	0	0	0	63840	0	63840	0.359	121	121	58479	24926	0	0.442	0.963	0.021	0.435	0.242	104868	683042	2354	82942	99759
Track_122	53	1	1	0	0	0	56392	0	56392	0.816	122	122	60287	24240	0	0.374	1116	0.034	0.317	0.239	155926	543064	0.197	147106	106007
Track_123	19	0	0	0	0	0	19152	0	19152	0.952	123	123	68220	25438	0	0.319	0.804	0.015	0.266	0.232	248251	508863	10304	259634	165566
Track_124	19	0	0	0	0	0	19152	0	19152	0.829	124	124	56773	25467	0	0.354	1200	0.031	0.237	0.285	219226	504339	68514	153707	131766
Track_126	33	1	2	0	0	0	36176	0	36176	1823	126	126	56743	27135	0	0.397	1039	0.101	0.307	0.263	214301	711074	29105	124962	189038
Track_127	60	1	1	0	0	0	63840	0	63840	2241	127	127	76825	32156	0	0.391	0.925	0.041	0.342	0.235	110286	869929	0.133	87455	114463
Track_129	60	1	1	0	0	0	63840	0	63840	2094	129	129	57915	25151	0	0.404	1025	0.066	0.417	0.254	151711	466588	8100	126022	101531
Track_130	61	0	0	0	0	0	63840	0	63840	3946	130	130	63972	25730	0	0.389	0.899	0.035	0.328	0.249	137805	649386	5076	101264	134442
Track_132	11	0	0	0	0	0	10640	0	10640	1002	132	132	75590	33576	0	0.433	0.737	0.18	0.45	0.192	141452	332088	43239	98234	107780
Track_133	22	0	0	0	0	0	22344	0	22344	0.432	133	133	77245	33393	0	0.302	0.845	0.054	0.27	0.184	147918	332392	14844	144837	81350
Track_134	23	0	0	0	0	0	23408	0	23408	1016	134	134	58559	25821	0	0.345	0.646	0.041	0.373	0.161	174605	631511	12915	136902	147928
Track_135	32	0	0	0	0	0	32984	0	32984	1964	135	135	77246	31955	0	0.353	1061	0.055	0.29	0.247	172218	563787	14018	134057	134880
Track_136	18	0	0	0	0	0	18088	0	18088	2071	136	136	82233	38792	0	0.431	1159	0.038	0.384	0.288	123413	248527	17060	131253	55433
Track_137	56	3	2	0	0	0	63840	0	63840	3568	137	137	79946	38888	0	0.299	1026	0.008	0.231	0.236	159442	499911	20460	154815	90377
Track_138	61	0	0	0	0	0	63840	0	63840	6785	138	138	81677	38324	0	0.396	1166	0.061	0.294	0.264	155127	946449	3645	110879	147511
Track_139	22	0	0	0	0	0	22344	0	22344	2353	139	139	68697	26998	0	0.457	0.874	0.077	0.459	0.253	123585	279622	21546	120701	65249
Track_140	59	1	2	0	0	0	63840	0	63840	1037	140	140	84199	41279	0	0.389	1149	0.044	0.316	0.267	212877	949410	9427	92534	239283
Track_141	25	1	1	0	0	0	26600	0	26600	1385	141	141	69271	25823	0	0.327	0.867	0.047	0.248	0.245	144394	403518	50838	119003	86530
Track_142	14	1	2	0	0	0	15960	0	15960	1172	142	142	76098	34067	0	0.382	0.917	0.051	0.249	0.282	184272	630078	4209	172483	158925
Track_143	61	0	0	0	0	0	63840	0	63840	2065	143	143	64527	26373	0	0.405	1066	0.034	0.388	0.256	117389	512500	1450	107962	81618
Track_144	45	1	1	0	0	0	47880	0	47880	2076	144	144	61738	26117	0	0.438	0.976	0.043	0.419	0.239	150860	523152	23650	119158	109117
Track_145	58	3	1	0	0	0	63840	0	63840	1245	145	145	76272	34304	0	0.384	1023	0.074	0.377	0.221	135997	441598	6539	134706	78645
Track_146	60	1	1	0	0	0	63840	0	63840	2580	146	146	64800	27539	0	0.389	0.955	0.043	0.394	0.222	128722	622262	16547	107691	109115
Track_147	59	1	2	0	0	0	63840	0	63840	2471	147	147	79162	34647	0	0.414	0.936	0.004	0.408	0.233	150053	636934	7568	106913	114954
Track_148	20	0	0	0	0	0	20216	0	20216	1303	148	148	65172	25587	0	0.434	0.884	0.072	0.467	0.235	278841	650766	22186	337174	219195
Track_149	22	0	0	0	0	0	22344	0	22344	1302	149	149	71485	26749	0	0.352	0.829	0.087	0.335	0.203	124552	186195	41330	131336	39129
Track_150	61	0	0	0	0	0	63840	0	63840	2676	150	150	79846	34960	0	0.34	0.971	0.021	0.286	0.211	98472	204235	20308	98978	42800
Track_151	56	3	2	0	0	0	63840	0	63840	1207	151	151	82800	40764	0	0.404	1000	0.087	0.407	0.202	174103	532349	7869	133645	127985
Track_152	19	0	0	0	0	0	19152	0	19152	2115	152	152	56205	26137	0	0.376	0.943	0.101	0.266	0.249	312419	851579	21851	296790	215467
Track_153	17	0	0	0	0	0	17024	0	17024	2251	153	153	60249	25530	0	0.508	1119	0.072	0.529	0.331	106110	220480	27392	90461	55137
Track_155	60	1	1	0	0	0	63840	0	63840	0.55	155	155	69990	26898	0	0.355	0.865	0.037	0.349	0.19	114932	258570	7401	112094	53712
Track_157	15	0	0	0	0	0	14896	0	14896	1029	157	157	70672	26644	0	0.286	0.838	0.08	0.191	0.225	103769	187176	21801	117078	46006
Track_158	59	1	1	0	0	0	62776	0	62776	2907	158	158	76996	33789	0	0.394	1034	0.074	0.406	0.218	219902	688520	13289	160154	160822
Track_159	13	1	1	0	0	0	13832	0	13832	0.538	159	159	71196	27079	0	0.258	0.424	0.01	0.25	0.115	107260	217010	25338	104149	52392
Track_160	60	1	1	0	0	0	63840	0	63840	2502	160	160	55493	25537	0	0.361	0.93	0.047	0.297	0.246	225349	593894	21490	174548	163882
Track_161	58	2	2	0	0	0	63840	0	63840	2507	161	161	78713	33590	0	0.462	1324	0.066	0.391	0.286	197153	794542	12925	105892	188705
Track_162	34	1	1	0	0	0	36176	0	36176	3450	162	162	61784	27873	0	0.418	1222	0.098	0.339	0.272	109851	252524	32077	87231	62043
Track_163	16	0	0	0	0	0	15960	0	15960	1494	163	163	66604	26057	0	0.335	0.664	0.05	0.242	0.206	114039	290719	34830	89446	77380
Track_164	10	0	0	0	0	0	9576	0	9576	0.517	164	164	57297	26604	0	0.345	0.601	0.198	0.337	0.143	176767	438204	2723	176507	117917
Track_165	22	1	1	0	0	0	23408	0	23408	1241	165	165	58306	27132	0	0.397	1156	0.075	0.361	0.249	107131	201481	20686	109974	52147
Track_166	57	1	1	0	0	0	60648	0	60648	2043	166	166	64337	27689	0	0.419	1031	0.027	0.375	0.255	125049	610213	13429	107848	100633
Track_167	30	0	0	0	0	0	30856	0	30856	1962	167	167	81532	40116	0	0.386	1021	0.059	0.276	0.279	135500	302402	28045	116549	65234
Track_170	59	2	1	0	0	0	63840	0	63840	4130	170	170	63102	26054	0	0.374	0.851	0.033	0.364	0.205	139664	382317	32539	138651	65336
Track_174	37	0	0	0	0	0	38304	2128	40432	1353	174	174	84940	40219	0	0.372	1090	0.048	0.317	0.268	496569	1039824	1869	404932	376282
Track_177	55	2	2	0	0	0	60648	2128	62776	3566	177	177	83721	40878	0	0.36	1051	0.044	0.342	0.196	208259	806341	10383	111136	223535
Track_178	25	0	0	0	0	0	25536	2128	27664	0.982	178	178	70527	30517	0	0.336	0.963	0.068	0.267	0.217	186018	316409	77071	190210	59850
Track_179	12	0	0	0	0	0	11704	3192	14896	0.822	179	179	63550	27744	0	0.316	0.849	0.03	0.255	0.269	192236	365410	86626	149982	99615
Track_180	56	2	2	0	0	0	61712	2128	63840	2219	180	180	80981	37972	0	0.395	1050	0.032	0.352	0.242	163453	753359	5400	126902	145288
Track_181	56	2	1	0	0	0	60648	2128	62776	4250	181	181	56623	25666	0	0.407	1030	0.021	0.361	0.251	108909	472014	0.762	92326	80793
Track_182	13	0	0	0	0	0	12768	2128	14896	2609	182	182	69075	28026	0	0.405	0.833	0.138	0.379	0.223	127673	240444	18429	136460	71225
Track_183	58	0	0	0	0	0	60648	3192	63840	4946	183	183	70453	27002	0	0.393	1091	0.062	0.363	0.242	152939	603429	13691	140094	120392
Track_184	25	0	0	0	0	0	25536	2128	27664	2330	184	184	62804	28066	0	0.282	0.9	0.016	0.21	0.236	157008	577378	0.842	100042	143674
Track_185	57	1	1	0	0	0	60648	3192	63840	0.739	185	185	65625	27675	0	0.335	0.691	0.044	0.332	0.184	201225	627829	23755	139908	150634
Track_186	54	1	2	0	0	0	58520	3192	61712	1161	186	186	72628	28860	0	0.403	0.96	0.058	0.363	0.2	142573	779332	1962	109963	155272
Track_187	23	1	1	0	0	0	24472	3192	27664	2444	187	187	72962	27754	0	0.376	1087	0.084	0.293	0.244	118649	201364	2010	136816	58919
Track_188	58	0	0	0	0	0	60648	3192	63840	0.359	188	188	73105	32004	0	0.407	0.939	0.081	0.388	0.232	198493	440649	1819	203051	117028
Track_189	57	0	0	0	0	0	59584	4256	63840	2454	189	189	76943	31656	0	0.473	0.932	0.04	0.475	0.247	132277	609948	2110	101028	114140
Track_190	55	2	1	0	0	0	59584	4256	63840	4021	190	190	77264	33564	0	0.442	1085	0.091	0.412	0.22	100259	219401	0.242	101581	54232
Track_193	34	0	0	0	0	0	35112	5320	40432	1676	193	193	67094	26375	0	0.379	0.916	0.029	0.38	0.202	86274	186983	3064	84678	53250
Track_194	27	0	0	0	0	0	27664	5320	32984	2386	194	194	75567	34126	0	0.438	0.884	0.013	0.476	0.276	160508	463575	1559	105888	132735
Track_195	40	2	2	0	0	0	44688	5320	50008	1136	195	195	60685	27698	0	0.374	0.985	0.039	0.292	0.253	100653	300160	5548	89910	57068
Track_196	22	4	2	0	0	0	27664	5320	32984	1833	196	196	55734	26124	0	0.477	0.97	0.063	0.444	0.247	152926	450962	8154	106738	126399
Track_197	34	1	2	0	0	0	37240	5320	42560	0.26	197	197	73763	28184	0	0.335	0.904	0.012	0.289	0.232	140208	440820	18559	129351	82674
Track_198	26	0	0	0	0	0	26600	5320	31920	0.341	198	198	69374	25866	0	0.359	0.816	0.049	0.371	0.195	114864	206217	6514	116005	51824
Track_199	56	0	0	0	0	0	58520	5320	63840	4430	199	199	68140	28758	0	0.436	1239	0.019	0.395	0.271	120151	541472	10431	87935	107497
Track_200	27	1	1	0	0	0	28728	5320	34048	1052	200	200	82625	42883	0	0.37	0.874	0.018	0.395	0.251	159318	440399	1281	141396	88762
Track_201	15	0	0	0	0	0	14896	6384	21280	0.42	201	201	78767	32829	0	0.518	1041	0.065	0.438	0.308	229990	672177	3774	121520	240456
Track_202	14	1	1	0	0	0	14896	6384	21280	0.363	202	202	55125	25553	0	0.448	1123	0.065	0.324	0.377	170288	481555	4585	182118	137012
Track_203	30	1	2	0	0	0	32984	6384	39368	1795	203	203	78446	34416	0	0.427	0.909	0.093	0.398	0.242	115039	238714	28752	111518	49053
Track_204	20	0	0	0	0	0	20216	7448	27664	1001	204	204	84171	41754	0	0.324	0.824	0.047	0.229	0.253	227364	724930	2436	166249	220101
Track_205	16	0	0	0	0	0	15960	7448	23408	1225	205	205	85857	41184	0	0.406	1105	0	0.338	0.317	151764	391583	10701	126669	118107
Track_206	13	1	2	0	0	0	14896	8512	23408	1845	206	206	56065	23964	0	0.503	0.891	0.168	0.494	0.253	220161	656095	25094	128973	191508
Track_207	33	1	1	0	0	0	35112	8512	43624	0.123	207	207	80729	40171	0	0.32	0.734	0.067	0.302	0.183	256680	498208	22789	236141	142295
Track_208	50	2	1	0	0	0	54264	9576	63840	2213	208	208	58581	26352	0	0.393	1127	0.051	0.287	0.263	124951	250622	22837	121934	55597
Track_209	49	2	2	0	0	0	54264	9576	63840	1553	209	209	79125	37288	0	0.361	0.961	0.062	0.301	0.219	160431	448769	3315	131562	111366
Track_210	52	0	0	0	0	0	54264	9576	63840	1965	210	210	78534	34795	0	0.482	1120	0.045	0.414	0.272	94563	447189	5374	82944	69533
Track_211	51	0	0	0	0	0	53200	10640	63840	1934	211	211	66910	27610	0	0.358	1136	0.035	0.36	0.247	219781	531477	19306	196346	127580
Track_213	50	1	1	0	0	0	53200	10640	63840	3817	213	213	63420	24499	0	0.413	0.935	0.054	0.386	0.196	146685	601271	13405	115471	131844
Track_214	14	1	2	0	0	0	15960	10640	26600	1786	214	214	66812	25571	0	0.289	0.523	0.045	0.33	0.14	60535	111292	12385	63222	33129
Track_215	29	1	2	0	0	0	31920	9576	41496	2355	215	215	65151	27486	0	0.308	0.729	0.065	0.252	0.193	109927	255388	13457	95755	57911
Track_216	10	1	1	0	0	0	10640	9576	20216	1406	216	216	63315	26380	0	0.444	0.84	0.249	0.335	0.21	80958	174349	3166	60189	57358
Track_217	17	0	0	0	0	0	17024	11704	28728	0.965	217	217	77700	35721	0	0.373	0.839	0.118	0.346	0.223	298062	622230	5873	331407	184491
Track_218	44	5	2	0	0	0	52136	11704	63840	0.704	218	218	85006	42453	0	0.373	1080	0.081	0.339	0.238	62549	163042	2143	57095	36655
Track_219	35	1	1	0	0	0	37240	11704	48944	2518	219	219	75591	32398	0	0.427	1017	0.009	0.377	0.266	107825	540694	13434	75981	97834
Track_221	32	0	0	0	0	0	32984	12768	45752	2945	221	221	56245	27111	0	0.405	1078	0.11	0.344	0.201	123059	511723	8403	87485	108036
Track_222	46	3	1	0	0	0	51072	12768	63840	2100	222	222	69154	27579	0	0.337	0.85	0.018	0.339	0.209	110062	251432	2089	110561	58960
Track_223	10	0	0	0	0	0	9576	12768	22344	1254	223	223	69290	27404	0	0.372	0.702	0.053	0.371	0.227	123276	287816	21686	113296	74938
Track_224	14	1	1	0	0	0	14896	12768	27664	0.773	224	224	63894	28711	0	0.334	0.805	0.156	0.255	0.197	94191	251840	26244	97147	58464
Track_225	10	0	0	0	0	0	9576	12768	22344	0.323	225	225	71175	28376	0	0.32	0.881	0.093	0.313	0.239	127735	276028	18956	116205	90953
Track_226	47	2	1	0	0	0	51072	12768	63840	3606	226	226	70062	29866	0	0.38	0.938	0.065	0.344	0.223	137149	307056	6062	127853	76538
Track_227	10	0	0	0	0	0	9576	12768	22344	1057	227	227	68405	30460	0	0.3	0.642	0.063	0.232	0.219	119592	246577	49409	114049	52244
Track_228	27	1	1	0	0	0	28728	12768	41496	1798	228	228	70465	31142	0	0.457	1172	0.023	0.373	0.327	139230	294341	3641	148897	73808
Track_229	46	2	2	0	0	0	51072	12768	63840	1826	229	229	73964	29508	0	0.463	0.988	0.038	0.502	0.261	101335	416867	13454	86318	81283
Track_230	13	1	2	0	0	0	14896	12768	27664	1518	230	230	79821	38185	0	0.457	1188	0.09	0.411	0.276	91971	162570	21416	93584	37083
Track_231	49	0	0	0	0	0	51072	12768	63840	0.927	231	231	79860	36773	0	0.42	0.96	0.071	0.427	0.224	160022	441133	14555	159744	90622
Track_232	15	0	0	0	0	0	14896	12768	27664	0.988	232	232	73315	30991	0	0.439	1046	0.026	0.525	0.323	91776	153414	22580	99309	37596
Track_233	47	2	1	0	0	0	51072	12768	63840	1460	233	233	81699	36952	0	0.482	1216	0.019	0.413	0.288	139221	756042	1198	102067	147243
Track_234	21	0	0	0	0	0	21280	12768	34048	2498	234	234	74223	30639	0	0.365	0.807	0.101	0.275	0.231	167350	465778	23223	144932	125994
Track_235	31	3	2	0	0	0	37240	12768	50008	0.456	235	235	67315	25707	0	0.404	1028	0.045	0.363	0.24	81725	191985	9995	82837	36536
Track_236	32	0	0	0	0	0	32984	12768	45752	1453	236	236	75014	33133	0	0.38	0.93	0.035	0.322	0.214	232848	647092	26968	202493	181616
Track_237	12	1	1	0	0	0	12768	12768	25536	1011	237	237	55334	26616	0	0.473	0.802	0.193	0.507	0.223	101743	312669	17322	94766	75548
Track_238	46	2	1	0	0	0	50008	13832	63840	3209	238	238	61988	26932	0	0.407	1205	0.064	0.327	0.268	102835	627166	13761	86909	95094
Track_239	47	0	0	0	0	0	48944	14896	63840	4056	239	239	67119	25368	0	0.386	1315	0.032	0.343	0.278	86524	302526	6380	70140	53253
Track_240	12	0	0	0	0	0	11704	14896	26600	0.857	240	240	60334	27222	0	0.246	0.679	0.104	0.196	0.16	146354	279813	39455	136323	65318
Track_242	46	1	1	0	0	0	48944	14896	63840	2025	242	242	79866	37313	0	0.379	0.93	0.081	0.284	0.227	166547	418164	5934	164462	82162
Track_243	19	0	0	0	0	0	19152	14896	34048	0.327	243	243	80124	36806	0	0.434	0.827	0.084	0.449	0.227	101706	380789	26522	77774	82889
Track_244	14	1	1	0	0	0	14896	14896	29792	0.223	244	244	83958	42756	0	0.298	0.636	0.049	0.244	0.154	73192	304984	3370	30968	89638
Track_245	43	3	2	0	0	0	48944	14896	63840	2221	245	245	82622	42732	0	0.379	0.895	0.074	0.344	0.226	148030	520347	33638	110073	104932
Track_246	43	2	2	0	0	0	47880	15960	63840	1526	246	246	74249	32938	0	0.338	0.962	0.074	0.287	0.231	224990	815174	3455	214273	149777
Track_247	46	0	0	0	0	0	47880	15960	63840	1167	247	247	55517	26784	0	0.433	1090	0.053	0.376	0.26	146669	682860	21946	87068	156105
Track_249	44	0	0	0	0	0	45752	18088	63840	4020	249	249	71738	28772	0	0.374	1025	0.022	0.339	0.264	180676	625704	2079	134638	129588
Track_250	44	0	0	0	0	0	45752	18088	63840	0.711	250	250	67559	29565	0	0.36	1025	0.037	0.305	0.261	132881	454249	8634	100997	99716
Track_253	27	0	0	0	0	0	27664	18088	45752	1111	253	253	76803	31834	0	0.382	1008	0.062	0.338	0.26	129782	328457	26451	105277	82537
Track_254	20	0	0	0	0	0	20216	18088	38304	1936	254	254	81384	36011	0	0.327	0.679	0.112	0.27	0.18	198061	616267	19641	174468	142707
Track_255	41	0	0	0	0	0	42560	19152	61712	1814	255	255	62415	27038	0	0.388	0.855	0.023	0.376	0.238	112480	237226	5826	105016	60956
Track_256	34	2	2	0	0	0	38304	19152	57456	0.139	256	256	73911	29816	0	0.368	0.872	0.078	0.324	0.209	105211	238099	14941	106880	46646
Track_257	33	0	0	0	0	0	34048	19152	53200	1836	257	257	72641	30190	0	0.466	1243	0.046	0.379	0.299	129446	459055	13596	122538	91466
Track_258	38	1	1	0	0	0	40432	19152	59584	1954	258	258	55985	23797	0	0.34	0.982	0.089	0.265	0.193	294984	694539	22447	279718	166699
Track_259	43	0	0	0	0	0	44688	19152	63840	1202	259	259	58780	27038	0	0.353	1011	0.053	0.334	0.23	98740	197224	1603	93629	45600
Track_260	32	2	2	0	0	0	36176	20216	56392	3218	260	260	65569	25699	0	0.5	1030	0.089	0.424	0.242	113337	525366	22320	81063	102993
Track_261	42	0	0	0	0	0	43624	20216	63840	1027	261	261	80715	40048	0	0.457	0.955	0.128	0.407	0.272	171259	566841	28511	124651	138539
Track_262	11	1	2	0	0	0	12768	20216	32984	0.96	262	262	62977	24344	0	0.531	0.991	0.079	0.494	0.314	69333	126869	13349	70171	40984
Track_263	13	0	0	0	0	0	12768	20216	32984	0.575	263	263	65100	25164	0	0.498	1114	0.11	0.526	0.314	180129	632289	32795	109437	172212
Track_264	41	0	0	0	0	0	42560	21280	63840	3931	264	264	79261	34919	0	0.362	0.83	0.04	0.342	0.218	107048	238377	29952	97737	50643
Track_265	30	0	0	0	0	0	30856	21280	52136	0.606	265	265	79461	34137	0	0.405	0.808	0.068	0.381	0.207	92490	179955	6481	98481	48420
Track_266	37	2	1	0	0	0	40432	21280	61712	2235	266	266	72642	27478	0	0.346	0.955	0.016	0.325	0.238	102500	263435	19501	84947	67151
Track_267	30	0	0	0	0	0	30856	21280	52136	4478	267	267	56294	27286	0	0.405	1074	0.064	0.373	0.271	76853	123707	10781	79943	31363
Track_268	30	1	1	0	0	0	31920	22344	54264	1860	268	268	77234	32573	0	0.475	0.891	0.098	0.464	0.202	123059	351743	27048	121143	71735
Track_269	35	0	0	0	0	0	36176	22344	58520	1491	269	269	64185	28225	0	0.43	0.884	0.022	0.363	0.217	74550	257859	1234	60828	58746
Track_270	32	1	1	0	0	0	34048	22344	56392	0.689	270	270	64353	26544	0	0.354	0.817	0.066	0.361	0.205	98244	232368	33875	95914	46224
Track_272	22	2	2	0	0	0	25536	22344	47880	1255	272	272	65722	25028	0	0.374	0.777	0.126	0.345	0.181	121998	520736	6303	82904	142382
Track_273	19	0	0	0	0	0	19152	22344	41496	3454	273	273	73945	31927	0	0.578	1156	0.102	0.62	0.283	117626	242284	43133	109155	53035
Track_274	39	0	0	0	0	0	40432	23408	63840	2232	274	274	58228	25904	0	0.411	1005	0.042	0.369	0.256	113564	372254	0.73	103360	70935
Track_275	39	0	0	0	0	0	40432	23408	63840	1137	275	275	56697	26283	0	0.392	0.838	0.032	0.353	0.22	122623	495425	5918	87055	114814
Track_276	33	2	1	0	0	0	36176	23408	59584	0.118	276	276	85961	41970	0	0.485	1088	0	0.447	0.302	127140	661239	6865	97836	131817
Track_277	38	0	0	0	0	0	39368	24472	63840	2472	277	277	82519	37728	0	0.385	0.884	0.113	0.29	0.218	139986	764351	1187	73831	197782
Track_278	9	1	1	0	0	0	9576	24472	34048	1838	278	278	78708	37030	0	0.408	0.705	0.249	0.369	0.17	108028	242769	39274	100122	59849
Track_280	33	1	1	0	0	0	35112	25536	60648	0.977	280	280	58466	24977	0	0.392	1161	0.021	0.326	0.287	171509	461873	19336	169626	101314
Track_281	17	1	1	0	0	0	18088	25536	43624	1225	281	281	73228	32532	0	0.341	0.697	0.017	0.357	0.173	242670	465813	7786	261421	106413
Track_283	29	0	0	0	0	0	29792	26600	56392	2533	283	283	65230	25931	0	0.391	0.845	0.122	0.369	0.182	127798	434605	18129	103904	86209
Track_284	26	1	1	0	0	0	27664	26600	54264	1153	284	284	70861	30926	0	0.325	0.952	0.058	0.261	0.2	261644	669519	55241	245662	151362
Track_285	33	3	1	0	0	0	37240	26600	63840	4251	285	285	82107	39893	0	0.439	0.959	0.024	0.46	0.211	87775	232827	4233	90936	51093
Track_286	36	0	0	0	0	0	37240	26600	63840	2594	286	286	63000	25340	0	0.367	1077	0.05	0.288	0.252	129817	280361	5426	129880	64030
Track_287	36	0	0	0	0	0	37240	26600	63840	2960	287	287	68992	28262	0	0.4	1114	0.046	0.329	0.231	123604	218450	16916	123781	59577
Track_288	36	0	0	0	0	0	37240	26600	63840	2598	288	288	71231	27064	0	0.435	0.937	0.114	0.417	0.199	134168	406464	28840	106970	88823
Track_289	32	3	2	0	0	0	37240	26600	63840	4497	289	289	71106	28205	0	0.37	0.999	0.025	0.293	0.248	117523	444648	7899	110826	88147
Track_290	22	1	1	0	0	0	23408	27664	51072	1878	290	290	82673	42544	0	0.414	0.896	0.109	0.385	0.229	160829	452146	6449	166010	97904
Track_291	29	0	0	0	0	0	29792	27664	57456	1803	291	291	84364	42163	0	0.319	0.782	0.034	0.35	0.154	109384	466588	3618	66303	124636
Track_292	20	0	0	0	0	0	20216	27664	47880	3415	292	292	62293	24122	0	0.383	0.669	0.059	0.365	0.2	124531	261191	20520	122244	64828
Track_293	34	1	1	0	0	0	36176	27664	63840	0.792	293	293	56016	24197	0	0.462	0.93	0.055	0.522	0.23	166544	530946	15119	115900	134760
Track_294	34	1	1	0	0	0	36176	27664	63840	0.98	294	294	75255	31888	0	0.431	0.952	0.008	0.386	0.264	116498	341565	16066	80094	84138
Track_295	16	1	1	0	0	0	17024	28728	45752	1710	295	295	58698	26422	0	0.468	1048	0.043	0.388	0.284	158245	257161	40504	170885	59662
Track_296	33	1	1	0	0	0	35112	28728	63840	1782	296	296	59176	27653	0	0.387	0.931	0.035	0.342	0.236	158955	536086	13301	109932	143527
Track_297	28	0	0	0	0	0	28728	28728	57456	4773	297	297	74444	31387	0	0.368	0.644	0.107	0.346	0.165	184657	625978	29215	127310	137725
Track_298	30	2	2	0	0	0	35112	28728	63840	2823	298	298	74926	32945	0	0.45	0.91	0.083	0.439	0.221	116826	579914	15364	92856	107451
Track_299	10	1	1	0	0	0	10640	28728	39368	1454	299	299	80087	34708	0	0.343	0.623	0.029	0.305	0.178	91416	191878	28411	80592	56361
Track_302	31	1	2	0	0	0	34048	29792	63840	2587	302	302	81925	41176	0	0.408	0.892	0.039	0.386	0.238	115261	306562	34298	103454	54172
Track_304	15	0	0	0	0	0	14896	30856	45752	1063	304	304	67397	29967	0	0.461	1076	0.138	0.442	0.259	119522	237591	19070	105081	68411
Track_305	29	1	1	0	0	0	30856	30856	61712	2215	305	305	67053	29833	0	0.441	1014	0.05	0.442	0.252	103562	247376	27606	99858	58285
Track_306	29	2	2	0	0	0	32984	30856	63840	1409	306	306	83147	38413	0	0.385	1008	0.06	0.329	0.279	89832	376878	11347	76173	73521
Track_307	30	1	2	0	0	0	32984	30856	63840	2014	307	307	63953	24949	0	0.442	0.898	0.065	0.429	0.222	179658	575343	50576	123008	141887
Track_309	14	0	0	0	0	0	13832	29792	43624	1628	309	309	79411	35853	0	0.472	0.901	0.214	0.421	0.2	126157	367772	17925	137602	93833
Track_310	31	0	0	0	0	0	31920	31920	63840	2780	310	310	66324	26320	0	0.361	0.992	0.012	0.337	0.2	96033	226066	6893	76476	56640
Track_311	28	1	1	0	0	0	29792	32984	62776	1795	311	311	79002	33709	0	0.418	1132	0.054	0.35	0.261	135669	668045	6489	96478	146208
Track_312	28	0	0	0	0	0	28728	32984	61712	2354	312	312	61918	25736	0	0.319	0.715	0.108	0.281	0.152	122724	256478	19030	117892	62770
Track_313	29	1	1	0	0	0	30856	32984	63840	0.829	313	313	76160	34033	0	0.518	1180	0.053	0.542	0.251	98635	205010	15894	87834	53299
Track_315	28	1	2	0	0	0	30856	32984	63840	1712	315	315	80867	39410	0	0.4	0.902	0.077	0.392	0.196	157574	483607	23421	125690	106324
Track_316	29	1	1	0	0	0	30856	32984	63840	1166	316	316	84704	40603	0	0.277	0.667	0.063	0.228	0.176	488299	822650	85073	585729	252414
Track_318	21	1	2	0	0	0	23408	32984	56392	0.788	318	318	81022	35027	0	0.416	1141	0.019	0.423	0.277	81230	159576	7908	83733	40470
Track_319	17	1	2	0	0	0	19152	32984	52136	1436	319	319	77992	36018	0	0.525	1002	0.082	0.54	0.308	139117	398458	22794	123043	95035
Track_320	27	1	1	0	0	0	28728	35112	63840	3163	320	320	60295	25733	0	0.336	0.919	0.026	0.318	0.23	136186	315720	15406	138195	74481
Track_321	16	1	1	0	0	0	17024	35112	52136	2174	321	321	59114	26965	0	0.345	0.699	0.118	0.244	0.209	116606	318020	6191	112923	78839
Track_322	28	0	0	0	0	0	28728	35112	63840	1665	322	322	57369	27331	0	0.426	0.979	0.1	0.365	0.251	116183	370876	18877	89832	89636
Track_323	28	0	0	0	0	0	28728	35112	63840	0.651	323	323	56157	26981	0	0.361	0.789	0.078	0.355	0.212	169272	529443	11783	130214	123946
Track_324	29	0	0	0	0	0	29792	34048	63840	2131	324	324	70484	27452	0	0.416	1334	0.062	0.404	0.315	114343	195385	32178	112595	40593
Track_325	19	0	0	0	0	0	19152	34048	53200	1105	325	325	70931	28720	0	0.411	0.66	0.055	0.469	0.208	80658	218474	2735	58288	65069
Track_326	28	0	0	0	0	0	28728	35112	63840	1801	326	326	59817	25962	0	0.388	1071	0.058	0.331	0.272	179099	647592	29457	136386	155327
Track_327	28	0	0	0	0	0	28728	35112	63840	3273	327	327	82390	39122	0	0.406	0.754	0.128	0.413	0.192	104396	226560	7285	97677	51310
Track_328	28	0	0	0	0	0	28728	35112	63840	1379	328	328	82242	38080	0	0.369	0.807	0.036	0.292	0.19	209234	696902	29384	126497	196905
Track_330	14	0	0	0	0	0	13832	36176	50008	1086	330	330	65696	29370	0	0.45	0.762	0.151	0.529	0.199	73256	202389	7248	62753	56852
Track_331	27	0	0	0	0	0	27664	36176	63840	2162	331	331	64172	26686	0	0.35	1083	0.028	0.303	0.237	100560	192297	29177	99133	40556
Track_334	26	0	0	0	0	0	26600	37240	63840	3039	334	334	77280	32005	0	0.448	1073	0.051	0.36	0.302	155018	519140	6365	113047	134546
Track_338	23	1	2	0	0	0	25536	38304	63840	0.774	338	338	69422	29753	0	0.417	1049	0.064	0.329	0.252	161529	278815	51424	151861	57113
Track_340	24	1	1	0	0	0	25536	38304	63840	2390	340	340	78331	36303	0	0.465	0.876	0.076	0.408	0.24	135353	447344	25008	98901	112543
Track_341	25	0	0	0	0	0	25536	38304	63840	1418	341	341	83662	38896	0	0.427	0.881	0.148	0.406	0.196	153242	422029	5082	142516	109575
Track_342	22	1	1	0	0	0	23408	40432	63840	1318	342	342	62878	25479	0	0.428	0.792	0.124	0.395	0.204	106606	347672	5851	92656	87905
Track_343	23	0	0	0	0	0	23408	40432	63840	2454	343	343	61068	25919	0	0.319	0.838	0.033	0.341	0.209	139703	252042	8085	152499	73733
Track_345	20	1	2	0	0	0	22344	41496	63840	1545	345	345	79430	34242	0	0.42	0.884	0.057	0.448	0.237	90085	168594	15366	91368	39048
Track_346	12	0	0	0	0	0	11704	41496	53200	1515	346	346	80385	34496	0	0.445	0.859	0.112	0.441	0.266	88940	153366	52593	75439	35620
Track_347	11	0	0	0	0	0	10640	41496	52136	1043	347	347	77061	34975	0	0.35	0.718	0.07	0.336	0.201	150182	343116	46235	133317	89488
Track_348	22	0	0	0	0	0	22344	41496	63840	0.5	348	348	80042	37552	0	0.434	1046	0.053	0.401	0.304	164574	540381	9018	126157	120127
Track_349	22	0	0	0	0	0	22344	41496	63840	0.562	349	349	69655	30938	0	0.419	1076	0.154	0.338	0.227	98040	227132	8773	90686	68795
Track_350	22	0	0	0	0	0	22344	41496	63840	2326	350	350	72389	30501	0	0.361	0.762	0.028	0.319	0.231	121596	256764	3439	123006	68479
Track_351	10	0	0	0	0	0	9576	43624	53200	1053	351	351	67895	28107	0	0.351	0.967	0.076	0.173	0.327	75795	162844	22244	62897	41743
Track_352	20	0	0	0	0	0	20216	43624	63840	0.329	352	352	67281	28963	0	0.301	0.733	0.024	0.285	0.2	150456	287615	14593	138175	71128
Track_354	18	2	1	0	0	0	20216	42560	62776	0.51	354	354	75815	29416	0	0.465	0.994	0.13	0.356	0.258	66707	158843	11632	63031	39529
Track_355	20	0	0	0	0	0	20216	43624	63840	0.781	355	355	82964	42569	0	0.38	0.829	0.066	0.41	0.228	106811	240179	9335	110118	54467
Track_357	19	1	1	0	0	0	20216	43624	63840	1226	357	357	82077	40147	0	0.335	0.737	0.059	0.32	0.184	221312	532616	39569	172927	143071
Track_359	11	1	1	0	0	0	11704	42560	54264	0.369	359	359	76808	30863	0	0.296	0.622	0.113	0.237	0.203	136143	244047	39207	112128	71418
Track_360	14	1	1	0	0	0	14896	42560	57456	0.763	360	360	58433	23267	0	0.449	0.87	0.145	0.351	0.23	93098	177327	47862	88813	36890
Track_361	18	0	0	0	0	0	18088	45752	63840	1555	361	361	73076	31645	0	0.349	0.736	0.051	0.366	0.201	114395	289410	17372	105669	68561
Track_363	18	0	0	0	0	0	18088	45752	63840	1539	363	363	65530	25325	0	0.446	0.959	0.025	0.38	0.287	91413	285676	17214	79858	61183
Track_364	18	0	0	0	0	0	18088	45752	63840	0.4	364	364	67922	26223	0	0.434	0.971	0.117	0.307	0.257	64707	189385	0.626	60297	47629
Track_365	17	1	1	0	0	0	18088	45752	63840	1946	365	365	56946	24817	0	0.5	1095	0.186	0.433	0.282	101719	317727	24825	90753	67305
Track_366	16	2	1	0	0	0	18088	45752	63840	0.582	366	366	54811	26176	0	0.476	0.947	0.101	0.487	0.261	82586	189285	16599	89046	44520
Track_367	17	0	0	0	0	0	17024	46816	63840	1690	367	367	60676	24023	0	0.453	1062	0.132	0.414	0.232	111924	558349	25439	72478	135887
Track_368	17	0	0	0	0	0	17024	46816	63840	0.842	368	368	61783	24440	0	0.322	0.736	0.09	0.286	0.194	71659	140132	13811	75125	34002
Track_369	17	0	0	0	0	0	17024	46816	63840	0.493	369	369	61739	25544	0	0.269	0.633	0.013	0.296	0.169	93907	151894	45138	93991	40017
Track_370	16	0	0	0	0	0	15960	47880	63840	0.813	370	370	72160	29190	0	0.443	0.988	0.068	0.341	0.294	186336	618964	20515	124740	171654
Track_372	14	1	2	0	0	0	15960	47880	63840	1522	372	372	58868	24901	0	0.342	0.884	0.079	0.25	0.244	82357	126518	9798	97184	36126
Track_373	11	0	0	0	0	0	10640	47880	58520	2326	373	373	64920	25329	0	0.291	0.605	0.092	0.235	0.164	134836	286381	13720	116084	75087
Track_374	16	0	0	0	0	0	15960	47880	63840	2080	374	374	68822	27583	0	0.308	0.897	0.046	0.295	0.245	130877	389698	24695	87158	106072
Track_377	16	0	0	0	0	0	15960	47880	63840	2283	377	377	78946	35375	0	0.392	1047	0.039	0.348	0.279	123813	252600	21804	132448	67456
Track_378	10	0	0	0	0	0	9576	47880	57456	0.97	378	378	83069	41709	0	0.542	0.966	0.244	0.517	0.253	97635	179653	3120	94942	48345
Track_379	15	0	0	0	0	0	14896	48944	63840	1745	379	379	76265	34650	0	0.314	0.733	0.025	0.335	0.183	65817	170794	13218	53688	41878
Track_380	14	0	0	0	0	0	13832	50008	63840	1042	380	380	81958	36166	0	0.316	0.789	0.054	0.305	0.2	196036	518519	51436	142170	150018
Track_381	14	0	0	0	0	0	13832	50008	63840	0.414	381	381	66696	29548	0	0.378	0.807	0.056	0.387	0.206	149328	330408	13964	142550	84126
Track_382	14	0	0	0	0	0	13832	50008	63840	0.072	382	382	68204	25169	0	0.176	0.293	0.101	0.132	0.073	72005	122719	9552	82845	31672
Track_383	14	0	0	0	0	0	13832	50008	63840	1086	383	383	66132	28561	0	0.314	0.83	0.114	0.267	0.194	121977	439876	27361	97397	107849
Track_385	13	0	0	0	0	0	12768	51072	63840	1474	385	385	77391	33597	0	0.318	0.645	0.034	0.283	0.21	84876	138654	3864	82994	41249
Track_386	8	1	2	0	0	0	9576	51072	60648	1381	386	386	84923	42119	0	0.223	0.47	0.044	0.22	0.163	61981	113935	22199	65333	32434
Track_387	13	0	0	0	0	0	12768	51072	63840	2270	387	387	71735	28442	0	0.384	0.563	0.187	0.408	0.107	173583	470046	48275	142319	133419
Track_388	11	1	2	0	0	0	12768	51072	63840	0.092	388	388	76712	30336	0	0.382	0.833	0.149	0.352	0.189	229032	538168	50775	104686	188773
Track_390	12	0	0	0	0	0	11704	52136	63840	1124	390	390	75083	30081	0	0.328	0.624	0.084	0.312	0.142	115969	204662	1274	120692	48080
Track_392	12	0	0	0	0	0	11704	52136	63840	1429	392	392	74234	32386	0	0.467	0.866	0.13	0.447	0.242	148396	369380	29556	139716	90789
Track_393	10	1	2	0	0	0	11704	52136	63840	0.324	393	393	55452	25262	0	0.416	1009	0.176	0.263	0.286	101523	145882	28838	109042	33068
Track_394	12	0	0	0	0	0	11704	52136	63840	0.97	394	394	82520	40067	0	0.417	0.866	0.046	0.387	0.257	146414	304875	23849	146180	68412
Track_396	11	0	0	0	0	0	10640	53200	63840	1676	396	396	63909	27895	0	0.604	1206	0.199	0.524	0.304	87194	134308	19146	97615	36557

## Sheet: Control L1 animal 2
																Mean speed										Average mean speed
Track_0	31	0	0	0	0	0	31920	0	31920	0.075	0	0	46686	37852	0	0.27	0.81	0.038	0.249	0.203	321243	511107	218311	315878	76252	0.276412
Track_1	19	0	0	0	0	0	19152	0	19152	1374	1	1	48660	37374	0	0.233	0.701	0.046	0.213	0.193	323755	501343	205060	319058	76463
Track_2	9	1	2	0	0	0	10640	0	10640	1504	2	2	50216	37219	0	0.365	1093	0.104	0.324	0.304	253368	324485	204044	233195	45171
Track_4	39	2	1	0	0	0	42560	0	42560	2105	4	4	48064	37156	0	0.209	0.852	0.031	0.143	0.231	330702	574213	203866	322466	84725
Track_6	12	0	0	0	0	0	11704	0	11704	0.908	6	6	46770	38792	0	0.328	0.913	0.003	0.312	0.291	267168	319477	202007	277342	36750
Track_8	22	1	1	0	0	0	23408	0	23408	0.426	8	8	46820	39488	0	0.287	0.799	0.027	0.269	0.198	281828	467714	216816	281840	61283
Track_10	15	0	0	0	0	0	14896	0	14896	2868	10	10	48870	43610	0	0.276	1067	0.035	0.151	0.304	326064	463447	220763	327918	64493
Track_12	20	1	1	0	0	0	21280	0	21280	1893	12	12	48646	40096	0	0.262	1093	0.05	0.116	0.312	317486	676325	215735	278934	115672
Track_15	42	3	2	0	0	0	47880	0	47880	3471	15	15	48176	44033	0	0.276	1014	0.023	0.231	0.248	372711	744789	206270	349054	121877
Track_16	59	2	1	0	0	0	63840	0	63840	0.884	16	16	51757	44977	0	0.235	0.854	0.011	0.135	0.242	557439	1069372	270897	555300	184746
Track_17	20	1	1	0	0	0	21280	0	21280	2331	17	17	50439	45269	0	0.227	1131	0.027	0.149	0.254	440092	872248	225965	451902	173141
Track_18	36	2	1	0	0	0	39368	0	39368	1295	18	18	50987	44460	0	0.215	1104	0.016	0.125	0.247	363159	612636	207363	351931	112467
Track_19	21	0	0	0	0	0	21280	0	21280	0.41	19	19	49301	44246	0	0.299	1075	0.041	0.145	0.339	293630	421440	206993	275766	64382
Track_20	17	0	0	0	0	0	17024	0	17024	1267	20	20	47206	42947	0	0.261	1250	0.027	0.148	0.309	275129	415334	201595	252448	69455
Track_25	26	2	2	0	0	0	29792	0	29792	1672	25	25	50965	45326	0	0.298	1042	0.017	0.168	0.32	482116	1338597	216482	444031	254289
Track_27	11	0	0	0	0	0	10640	0	10640	0.67	27	27	49193	45403	0	0.424	1094	0.087	0.462	0.304	316180	542072	207836	275516	108510
Track_29	35	2	2	0	0	0	40432	0	40432	1948	29	29	50385	16411	0	0.24	0.927	0.038	0.192	0.206	374666	850307	202943	327897	148749
Track_30	15	0	0	0	0	0	14896	0	14896	1826	30	30	55545	14364	0	0.2	0.668	0.038	0.174	0.176	412473	732276	220583	391398	150518
Track_35	13	2	2	0	0	0	17024	0	17024	0.596	35	35	51954	9674	0	0.233	0.715	0.04	0.151	0.235	318221	507649	205456	299289	91132
Track_36	27	3	2	0	0	0	31920	0	31920	3297	36	36	51341	47268	0	0.293	1270	0.046	0.229	0.285	320011	647849	201330	281941	110667
Track_37	21	1	2	0	0	0	23408	0	23408	4079	37	37	50261	17045	0	0.229	0.886	0.028	0.176	0.209	520516	901984	252822	513488	173739
Track_38	13	0	0	0	0	0	12768	0	12768	0.075	38	38	55518	18545	0	0.426	1252	0.02	0.452	0.437	289368	425417	208351	260853	62571
Track_39	14	2	2	0	0	0	17024	0	17024	0.92	39	39	54241	18346	0	0.342	1352	0.044	0.153	0.394	308204	512257	200694	253483	113002
Track_42	18	2	2	0	0	0	22344	0	22344	1729	42	42	51306	18365	0	0.437	1303	0.013	0.156	0.441	292542	612465	204686	278979	99225
Track_43	30	3	2	0	0	0	36176	0	36176	1675	43	43	49586	18321	0	0.391	1225	0.026	0.16	0.4	314081	675772	202359	268748	125911
Track_44	14	2	1	0	0	0	15960	0	15960	1774	44	44	56348	16449	0	0.244	0.913	0.028	0.132	0.268	256557	368630	204721	251896	40626
Track_46	20	1	1	0	0	0	21280	0	21280	0.897	46	46	56170	17548	0	0.302	1386	0.017	0.106	0.384	244413	302688	200372	240155	24736
Track_47	14	0	0	0	0	0	13832	0	13832	2421	47	47	52551	16235	0	0.432	1323	0.038	0.225	0.418	418063	621310	204329	475686	127984
Track_50	57	3	2	0	0	0	63840	0	63840	3348	50	50	53660	19220	0	0.302	1308	0.004	0.194	0.313	360701	844190	200301	329413	137492
Track_51	15	3	2	0	0	0	19152	0	19152	1776	51	51	48703	20344	0	0.262	0.928	0.031	0.134	0.314	272245	436358	204112	239159	71165
Track_52	25	1	1	0	0	0	26600	0	26600	1979	52	52	52163	21190	0	0.339	1180	0.007	0.241	0.276	335619	658295	202442	284569	139795
Track_53	13	0	0	0	0	0	12768	0	12768	2818	53	53	49752	20204	0	0.329	1091	0.03	0.147	0.369	349251	509458	211069	326094	87797
Track_54	15	0	0	0	0	0	14896	0	14896	0.851	54	54	48386	20877	0	0.236	1033	0.02	0.155	0.277	370865	646279	218192	306353	118179
Track_55	22	2	1	0	0	0	24472	0	24472	0.397	55	55	49623	19799	0	0.243	0.785	0.004	0.249	0.174	292388	459501	209648	291321	67988
Track_58	22	2	1	0	0	0	24472	0	24472	0.608	58	58	56709	19117	0	0.114	0.525	0.023	0.053	0.137	299604	438483	216691	289719	53108
Track_59	28	3	2	0	0	0	34048	0	34048	0.618	59	59	52994	18466	0	0.222	1168	0.045	0.13	0.28	308696	440788	212703	308088	63763
Track_60	30	1	1	0	0	0	31920	0	31920	2267	60	60	57115	22366	0	0.18	0.551	0.007	0.084	0.185	347791	721515	210589	300253	135567
Track_61	34	2	2	0	0	0	38304	0	38304	3368	61	61	53114	22090	0	0.278	1226	0.022	0.197	0.285	526010	923584	200752	579550	202910
Track_62	16	1	1	0	0	0	17024	0	17024	0.229	62	62	52639	23013	0	0.174	0.589	0.026	0.107	0.162	559870	843413	201666	608214	200048
Track_65	60	0	0	0	0	0	62776	0	62776	4356	65	65	48874	21592	0	0.194	1299	0.01	0.11	0.251	368720	741965	211976	324175	122625
Track_66	17	1	1	0	0	0	18088	0	18088	1092	66	66	51474	23480	0	0.202	1148	0.01	0.096	0.298	265741	355707	201243	269955	44152
Track_67	31	1	1	0	0	0	32984	0	32984	1350	67	67	53887	22505	0	0.164	0.506	0.031	0.149	0.103	478955	1047964	226474	454250	205649
Track_68	14	0	0	0	0	0	13832	0	13832	0.774	68	68	57175	22424	0	0.33	1012	0.026	0.155	0.333	485769	1274793	202435	332673	341746
Track_69	20	0	0	0	0	0	20216	0	20216	1110	69	69	48571	22674	0	0.345	1247	0.036	0.135	0.39	326295	636008	225103	271057	113700
Track_72	13	0	0	0	0	0	12768	0	12768	1602	72	72	57366	21118	0	0.25	1068	0.036	0.196	0.29	456840	696454	217804	472395	154582
Track_74	14	2	1	0	0	0	15960	0	15960	1184	74	74	52992	27900	0	0.33	0.997	0.045	0.163	0.307	314346	500496	203258	270004	108632
Track_75	21	1	2	0	0	0	23408	0	23408	0.776	75	75	48177	28112	0	0.26	1108	0.017	0.084	0.365	312433	510821	201804	274197	92785
Track_76	23	1	1	0	0	0	24472	0	24472	0.556	76	76	52240	27755	0	0.325	1035	0.063	0.201	0.294	288754	423628	200324	287684	56197
Track_78	26	0	0	0	0	0	26600	0	26600	0.447	78	78	52595	26148	0	0.228	0.724	0.032	0.133	0.226	411653	1028147	201551	419477	169994
Track_84	12	1	1	0	0	0	12768	0	12768	1376	84	84	49445	25891	0	0.29	1285	0.059	0.123	0.397	376923	711058	264001	349103	115578
Track_85	59	1	2	0	0	0	63840	0	63840	1744	85	85	50337	29323	0	0.18	1102	0.005	0.064	0.294	370641	1224579	207678	302960	188659
Track_86	16	1	1	0	0	0	17024	0	17024	0.838	86	86	46744	31187	0	0.138	0.831	0.035	0.069	0.199	244921	317899	211522	234365	32157
Track_87	47	3	1	0	0	0	52136	0	52136	0.95	87	87	48196	32484	0	0.32	1179	0.008	0.165	0.342	304979	657915	200118	262022	112010
Track_88	25	0	0	0	0	0	25536	0	25536	0.874	88	88	48618	29778	0	0.13	0.701	0.017	0.083	0.148	359146	609336	209979	341810	99940
Track_89	31	0	0	0	0	0	31920	0	31920	3456	89	89	50763	27911	0	0.245	1378	0.027	0.089	0.334	323346	548423	200820	313979	78145
Track_92	21	0	0	0	0	0	21280	0	21280	0.33	92	92	49096	32523	0	0.275	1231	0.004	0.107	0.37	422238	858313	205780	321363	188198
Track_93	47	2	2	0	0	0	52136	0	52136	1787	93	93	50282	31157	0	0.197	0.971	0.018	0.144	0.192	427241	872168	212263	384334	166692
Track_95	22	1	1	0	0	0	23408	0	23408	2099	95	95	47030	34791	0	0.199	0.923	0.013	0.105	0.251	357795	560821	208772	341474	112964
Track_96	27	0	0	0	0	0	27664	0	27664	1526	96	96	50461	33707	0	0.146	0.85	0.012	0.088	0.196	390272	671529	201237	393123	137765
Track_98	14	0	0	0	0	0	13832	0	13832	0.913	98	98	48660	35618	0	0.123	0.392	0.007	0.102	0.102	377036	662997	204362	350287	112802
Track_99	42	2	1	0	0	0	45752	0	45752	3270	99	99	47819	38014	0	0.241	1344	0.027	0.116	0.318	359063	669280	203395	332725	112195
Track_104	20	0	0	0	0	0	20216	1064	21280	2053	104	104	50454	19101	0	0.257	0.843	0.064	0.121	0.261	328075	526973	213091	314603	94431
Track_106	12	1	1	0	0	0	12768	1064	13832	0.713	106	106	48587	39214	0	0.241	0.675	0.035	0.15	0.207	269968	327012	208095	268079	40073
Track_107	12	2	1	0	0	0	13832	1064	14896	0.875	107	107	52521	7126	0	0.127	0.368	0.011	0.097	0.098	299966	391906	238962	296595	40968
Track_108	11	0	0	0	0	0	10640	1064	11704	0.577	108	108	53703	4780	0	0.177	0.487	0.043	0.165	0.136	261455	314570	206837	252624	35928
Track_110	17	0	0	0	0	0	17024	2128	19152	2652	110	110	54318	6349	0	0.432	1302	0.035	0.238	0.468	333861	477247	202318	333655	95427
Track_112	54	4	2	0	0	0	61712	2128	63840	0.608	112	112	48675	36093	0	0.413	1388	0.005	0.17	0.447	286880	545982	201624	269462	71496
Track_115	27	2	1	0	0	0	29792	2128	31920	0.159	115	115	52408	24855	0	0.237	0.567	0.046	0.221	0.146	430726	790058	224155	384288	177589
Track_116	15	4	2	0	0	0	20216	2128	22344	0.631	116	116	53809	24228	0	0.191	0.666	0.073	0.145	0.159	359673	692637	231899	352381	114314
Track_117	43	1	2	0	0	0	46816	2128	48944	2153	117	117	48981	48816	0	0.346	1342	0.009	0.223	0.321	391149	864429	209891	354894	158034
Track_120	12	0	0	0	0	0	11704	3192	14896	1165	120	120	47559	45732	0	0.258	1231	0.017	0.148	0.343	382056	530610	233283	418602	95030
Track_121	47	2	2	0	0	0	52136	3192	55328	0.699	121	121	49193	49740	0	0.198	0.825	0.013	0.114	0.216	338788	672404	202681	293817	126103
Track_125	54	1	1	0	0	0	57456	3192	60648	3689	125	125	46748	35519	0	0.23	1152	0.007	0.132	0.253	296152	519776	204479	274953	72642
Track_127	48	6	2	0	0	0	58520	5320	63840	3937	127	127	49084	17392	0	0.349	1404	0.004	0.164	0.382	279458	569946	201544	245030	87239
Track_129	17	1	2	0	0	0	19152	4256	23408	1302	129	129	56527	21021	0	0.135	0.409	0.018	0.113	0.118	422271	621766	259354	404308	117076
Track_140	50	2	1	0	0	0	54264	6384	60648	1389	140	140	49821	47054	0	0.193	1133	0.012	0.107	0.23	336055	694634	200354	319343	98624
Track_141	15	1	1	0	0	0	15960	6384	22344	1013	141	141	48852	49859	0	0.2	1216	0.037	0.101	0.305	390000	688859	204082	395379	141944
Track_142	14	2	2	0	0	0	17024	6384	23408	2957	142	142	55068	9411	0	0.352	1369	0.052	0.123	0.417	233412	287478	200258	230049	26994
Track_144	11	0	0	0	0	0	10640	6384	17024	0.232	144	144	50145	39664	0	0.064	0.129	0.014	0.058	0.039	346927	472901	212243	344064	75183
Track_145	51	2	2	0	0	0	56392	7448	63840	2117	145	145	52958	20654	0	0.253	1108	0.006	0.161	0.24	436989	995339	219260	411670	199156
Track_149	13	3	1	0	0	0	15960	7448	23408	1305	149	149	51217	41351	0	0.238	1148	0.048	0.092	0.315	261711	356377	208877	259793	41308
Track_152	11	0	0	0	0	0	10640	8512	19152	0.775	152	152	51596	40524	0	0.137	0.321	0.028	0.156	0.089	314317	471136	230961	299027	77880
Track_153	25	4	2	0	0	0	32984	9576	42560	3562	153	153	48560	19544	0	0.354	1344	0.03	0.203	0.382	278940	399968	208157	276451	49310
Track_155	33	3	2	0	0	0	38304	9576	47880	2096	155	155	48446	26202	0	0.3	1218	0.01	0.173	0.32	309667	446185	203554	325561	68306
Track_157	16	2	1	0	0	0	18088	10640	28728	2024	157	157	51943	15316	0	0.427	1366	0.039	0.26	0.423	248094	317290	209174	240004	34754
Track_158	24	1	2	0	0	0	26600	10640	37240	1554	158	158	49357	20900	0	0.369	1026	0.021	0.274	0.319	311895	584763	201730	283117	93738
Track_159	13	1	1	0	0	0	13832	10640	24472	1333	159	159	53552	27786	0	0.187	1000	0.027	0.125	0.27	299697	465942	202164	280133	75495
Track_160	22	3	1	0	0	0	25536	10640	36176	0.617	160	160	56763	25154	0	0.296	1258	0.003	0.126	0.376	411033	948262	202679	408649	193075
Track_162	13	1	1	0	0	0	13832	10640	24472	3144	162	162	47760	39596	0	0.351	1275	0.041	0.186	0.44	277287	401943	203149	272741	53188
Track_165	15	1	1	0	0	0	15960	11704	27664	1218	165	165	53779	4089	0	0.296	0.826	0.02	0.214	0.282	373584	910482	209365	331761	177679
Track_166	14	1	1	0	0	0	14896	8512	23408	3719	166	166	50928	11700	0	0.563	1350	0.028	0.441	0.479	288299	435739	207705	284621	62462
Track_168	18	2	2	0	0	0	21280	11704	32984	0.676	168	168	49836	15486	0	0.427	1193	0.035	0.225	0.379	291445	524186	205113	281246	96077
Track_169	44	2	1	0	0	0	47880	11704	59584	1235	169	169	48687	41521	0	0.153	0.802	0.027	0.099	0.145	329926	714765	226449	305854	90476
Track_170	18	2	2	0	0	0	21280	11704	32984	1573	170	170	55638	21971	0	0.298	1354	0.016	0.162	0.383	311721	471311	221059	299005	74872
Track_171	46	4	1	0	0	0	52136	8512	60648	0.751	171	171	48073	27720	0	0.203	1057	0.016	0.1	0.254	321031	554067	200927	309311	93952
Track_176	9	1	2	0	0	0	10640	12768	23408	1316	176	176	50991	20308	0	0.209	1274	0.004	0.069	0.431	311278	490104	217558	288617	88156
Track_177	18	2	1	0	0	0	20216	12768	32984	0.146	177	177	51795	43373	0	0.44	1255	0.055	0.306	0.379	331547	526001	209776	322260	94280
Track_178	26	4	2	0	0	0	31920	13832	45752	3102	178	178	51572	9963	0	0.35	1346	0.019	0.118	0.426	263711	503847	202244	228419	82472
Track_179	40	0	0	0	0	0	41496	13832	55328	0.897	179	179	56154	21363	0	0.133	0.932	0.011	0.061	0.214	369548	753531	202312	365979	105983
Track_182	32	0	0	0	0	0	32984	14896	47880	0.755	182	182	47485	46189	0	0.163	0.48	0.009	0.148	0.124	343106	585381	222490	341864	82955
Track_183	44	2	2	0	0	0	48944	14896	63840	2425	183	183	47957	45576	0	0.193	1060	0.02	0.142	0.191	414090	647368	200698	413288	94534
Track_185	38	1	1	0	0	0	40432	14896	55328	0.282	185	185	49903	48448	0	0.223	1227	0.008	0.11	0.3	301199	467318	201128	298681	74537
Track_186	10	3	1	0	0	0	12768	14896	27664	1274	186	186	49579	24021	0	0.25	1009	0.03	0.068	0.368	239672	295360	202491	231793	32194
Track_187	44	2	2	0	0	0	48944	14896	63840	1991	187	187	49152	45704	0	0.248	1090	0.009	0.135	0.268	358083	616728	210840	340053	107898
Track_188	45	2	1	0	0	0	48944	14896	63840	2733	188	188	51882	23252	0	0.17	1019	0.014	0.088	0.215	377831	711081	213269	347022	135879
Track_189	21	1	1	0	0	0	22344	14896	37240	1185	189	189	49657	31934	0	0.382	1258	0.042	0.22	0.426	364517	746539	200465	333295	154320
Track_190	11	1	1	0	0	0	11704	14896	26600	2970	190	190	50183	37342	0	0.57	1289	0.038	0.672	0.507	310726	642605	201891	243619	128767
Track_191	19	1	1	0	0	0	20216	14896	35112	0.173	191	191	56038	16356	0	0.335	1156	0.022	0.106	0.438	301941	551348	200371	272474	95291
Track_193	35	2	2	0	0	0	39368	15960	55328	1575	193	193	48298	33439	0	0.283	1113	0.028	0.181	0.291	288215	493142	202214	274273	70956
Track_197	13	1	2	0	0	0	14896	15960	30856	1474	197	197	48931	42313	0	0.506	0.978	0.009	0.746	0.362	301325	531868	202709	265251	87963
Track_200	11	0	0	0	0	0	10640	17024	27664	0.455	200	200	46856	42229	0	0.325	0.806	0.055	0.256	0.213	236264	348462	203111	210359	46110
Track_201	39	1	2	0	0	0	42560	17024	59584	1451	201	201	52427	22171	0	0.267	0.925	0.004	0.175	0.236	466986	1016113	201399	443886	199717
Track_202	10	1	1	0	0	0	10640	17024	27664	1521	202	202	49336	44124	0	0.266	0.966	0.032	0.244	0.279	394571	797965	231949	308427	196881
Track_203	40	3	2	0	0	0	46816	17024	63840	0.71	203	203	52650	26458	0	0.29	1069	0.016	0.217	0.253	367830	840115	206959	335965	145130
Track_204	28	1	1	0	0	0	29792	17024	46816	2557	204	204	52644	25445	0	0.22	0.861	0.034	0.126	0.227	390774	819835	200856	346235	153729
Track_205	27	0	0	0	0	0	27664	17024	44688	0.912	205	205	56404	24429	0	0.173	0.774	0.025	0.127	0.16	403649	658812	216186	377535	121275
Track_207	44	1	1	0	0	0	46816	17024	63840	0.694	207	207	47109	34376	0	0.221	0.931	0.021	0.151	0.213	273416	408444	202411	279203	49809
Track_209	36	1	1	0	0	0	38304	17024	55328	4041	209	209	46832	37650	0	0.279	0.966	0.03	0.211	0.262	269674	434343	200069	253208	54328
Track_211	33	3	2	0	0	0	38304	18088	56392	1055	211	211	55412	22694	0	0.209	1335	0.031	0.138	0.281	362326	796639	204711	273510	150456
Track_212	26	1	1	0	0	0	27664	18088	45752	0.938	212	212	53992	24101	0	0.232	0.878	0.042	0.156	0.205	354060	717174	210634	279622	156745
Track_213	16	0	0	0	0	0	15960	19152	35112	1586	213	213	53870	9805	0	0.251	1124	0.061	0.215	0.254	407493	808697	230847	414654	142466
Track_218	17	1	1	0	0	0	18088	21280	39368	0.763	218	218	57192	22696	0	0.312	0.974	0.016	0.174	0.339	356396	763743	214295	336776	126545
Track_219	22	2	2	0	0	0	25536	21280	46816	1979	219	219	49848	27304	0	0.394	1262	0.022	0.164	0.426	261295	441813	207232	240416	56979
Track_221	36	1	1	0	0	0	38304	22344	60648	1644	221	221	48887	32629	0	0.383	1223	0.014	0.132	0.413	326662	606038	215180	302883	92087
Track_222	11	2	2	0	0	0	14896	22344	37240	3197	222	222	47308	32748	0	0.408	1114	0.031	0.094	0.45	287577	457677	209817	257394	85485
Track_223	26	0	0	0	0	0	26600	22344	48944	2109	223	223	46871	39270	0	0.239	1308	0.017	0.103	0.312	299267	436900	209957	290870	53540
Track_227	12	0	0	0	0	0	11704	21280	32984	0.239	227	227	48213	42323	0	0.321	1095	0.076	0.172	0.346	391823	661632	245181	393923	122243
Track_235	17	0	0	0	0	0	17024	24472	41496	2327	235	235	52149	8046	0	0.204	0.562	0.023	0.187	0.155	415107	694053	263070	415001	120895
Track_236	38	0	0	0	0	0	39368	24472	63840	0.082	236	236	56671	19151	0	0.053	0.112	0.006	0.05	0.028	351730	611122	208565	318958	105136
Track_238	11	1	1	0	0	0	11704	23408	35112	0.831	238	238	52581	24426	0	0.505	1280	0.042	0.374	0.462	344006	445988	202029	378258	77973
Track_240	38	0	0	0	0	0	39368	24472	63840	1246	240	240	48506	29666	0	0.181	1151	0.006	0.07	0.304	381960	655875	228075	380743	107661
Track_242	29	0	0	0	0	0	29792	25536	55328	1832	242	242	55095	8171	0	0.163	1384	0.004	0.077	0.297	280276	393109	213293	261424	54357
Track_243	12	0	0	0	0	0	11704	25536	37240	1561	243	243	55226	6186	0	0.252	0.768	0.134	0.195	0.176	310792	459597	222133	318287	68964
Track_246	35	2	1	0	0	0	38304	25536	63840	2948	246	246	47974	45253	0	0.288	1156	0.022	0.157	0.306	353515	500492	202212	354302	90214
Track_247	30	3	2	0	0	0	36176	25536	61712	1790	247	247	51019	23819	0	0.366	1352	0.01	0.163	0.426	282591	505047	202351	267002	65787
Track_251	10	1	1	0	0	0	10640	26600	37240	0.966	251	251	48800	37831	0	0.581	1287	0.123	0.541	0.327	237728	256532	200670	243355	16538
Track_252	26	2	2	0	0	0	29792	26600	56392	3197	252	252	52057	15861	0	0.281	0.95	0.015	0.152	0.273	295861	435922	220187	278956	52396
Track_253	15	0	0	0	0	0	14896	26600	41496	1783	253	253	54440	14466	0	0.167	0.569	0.025	0.141	0.136	315053	566641	210605	298313	96039
Track_255	14	0	0	0	0	0	13832	26600	40432	2135	255	255	54592	17597	0	0.442	1026	0.011	0.279	0.373	322268	577995	208668	316005	100889
Track_257	33	2	1	0	0	0	36176	27664	63840	3021	257	257	51236	43154	0	0.364	1364	0.014	0.166	0.405	329248	626318	200703	300878	112111
Track_258	31	3	2	0	0	0	36176	27664	63840	0.927	258	258	49361	24074	0	0.294	1250	0.031	0.115	0.36	267684	378250	203819	261425	48388
Track_264	10	2	1	0	0	0	11704	27664	39368	0.162	264	264	50031	13381	0	0.071	0.261	0.009	0.049	0.075	308390	575487	208380	285505	102900
Track_269	22	2	1	0	0	0	24472	28728	53200	1507	269	269	49255	35066	0	0.305	1151	0.01	0.1	0.393	277304	423203	200149	269285	65456
Track_271	31	3	1	0	0	0	35112	28728	63840	4123	271	271	52431	10955	0	0.361	1298	0.01	0.154	0.419	270095	511521	200478	244593	75274
Track_272	17	3	2	0	0	0	23408	28728	52136	3923	272	272	51158	38401	0	0.544	1390	0.065	0.366	0.437	266293	360535	201440	256749	47525
Track_274	17	2	2	0	0	0	21280	28728	50008	1491	274	274	50764	18618	0	0.282	0.98	0.044	0.172	0.272	300667	465380	201981	290146	79778
Track_277	16	2	2	0	0	0	19152	30856	50008	2181	277	277	52976	16875	0	0.355	1097	0.03	0.139	0.381	280899	439072	207556	243373	70186
Track_278	33	0	0	0	0	0	34048	29792	63840	0.951	278	278	52404	24388	0	0.203	0.808	0.02	0.16	0.203	479311	967715	219721	406856	192399
Track_280	32	0	0	0	0	0	32984	29792	62776	4677	280	280	53720	20390	0	0.265	1099	0.06	0.186	0.252	466831	814687	205836	446958	144571
Track_283	15	1	1	0	0	0	15960	29792	45752	1691	283	283	50408	40647	0	0.379	0.999	0.02	0.191	0.343	274870	431552	202084	254630	71083
Track_292	22	0	0	0	0	0	22344	31920	54264	3780	292	292	49331	20565	0	0.352	1310	0.017	0.17	0.358	258974	383634	201222	256535	44773
Track_293	24	1	1	0	0	0	25536	31920	57456	2031	293	293	48395	28327	0	0.344	1096	0.062	0.16	0.36	323093	688047	205202	275450	138266
Track_296	15	0	0	0	0	0	14896	32984	47880	1092	296	296	50601	15555	0	0.42	1289	0.057	0.168	0.431	308870	575872	200712	305070	95501
Track_297	30	0	0	0	0	0	30856	32984	63840	2785	297	297	55973	20682	0	0.273	1235	0.014	0.075	0.363	308652	523126	202708	295109	93144
Track_298	11	1	2	0	0	0	12768	32984	45752	0.71	298	298	48808	24668	0	0.273	0.814	0.054	0.129	0.29	293127	404260	203694	243144	77700
Track_299	25	1	2	0	0	0	27664	32984	60648	1114	299	299	53970	23544	0	0.149	0.488	0.007	0.105	0.138	534420	1031651	240008	497962	206869
Track_300	18	3	2	0	0	0	22344	32984	55328	1329	300	300	55365	7294	0	0.183	0.72	0.081	0.142	0.146	343827	580944	224340	336491	99258
Track_301	18	2	2	0	0	0	21280	32984	54264	0.881	301	301	54087	5715	0	0.413	1065	0.029	0.265	0.375	289541	475983	201027	271965	71832
Track_302	15	1	1	0	0	0	15960	34048	50008	0.844	302	302	53054	12717	0	0.103	0.38	0.016	0.071	0.107	274837	358935	215222	269914	40260
Track_303	13	2	2	0	0	0	15960	34048	50008	2006	303	303	51220	46672	0	0.128	0.25	0.014	0.134	0.081	330495	507172	207916	326263	81529
Track_304	24	2	2	0	0	0	27664	34048	61712	2896	304	304	49829	43996	0	0.297	0.871	0.033	0.198	0.277	306107	514935	204833	296327	82284
Track_305	16	3	2	0	0	0	20216	34048	54264	3022	305	305	48613	44682	0	0.378	1066	0.04	0.251	0.34	293156	474279	205390	256449	86512
Track_309	25	0	0	0	0	0	25536	34048	59584	0.969	309	309	52346	27927	0	0.172	0.512	0.047	0.151	0.112	278663	414617	212094	284303	54170
Track_310	16	1	1	0	0	0	17024	34048	51072	1006	310	310	47012	30809	0	0.338	1245	0.054	0.158	0.361	275258	335861	200115	276794	44155
Track_312	26	2	1	0	0	0	28728	35112	63840	4405	312	312	48215	23354	0	0.439	1329	0.028	0.172	0.46	276945	491124	205945	263115	72146
Track_313	27	1	1	0	0	0	28728	35112	63840	3202	313	313	54429	24732	0	0.186	0.581	0.032	0.159	0.131	516545	951569	203664	495991	212102
Track_314	22	2	2	0	0	0	25536	36176	61712	0.825	314	314	51464	43410	0	0.264	0.811	0.049	0.153	0.271	336106	612184	202956	331466	105216
Track_315	22	0	0	0	0	0	22344	36176	58520	1926	315	315	52539	26553	0	0.184	1043	0.023	0.157	0.209	471748	781864	250887	464338	161524
Track_316	14	0	0	0	0	0	13832	36176	50008	1871	316	316	51679	11747	0	0.51	1254	0.053	0.228	0.464	298935	629006	203515	255091	126932
Track_318	11	2	2	0	0	0	13832	36176	50008	1115	318	318	55416	18049	0	0.468	1278	0.089	0.199	0.455	260330	345709	225727	241857	36985
Track_323	18	1	1	0	0	0	19152	37240	56392	0.816	323	323	54238	21736	0	0.472	1300	0.031	0.235	0.483	292426	562966	203613	269284	81029
Track_325	22	2	2	0	0	0	25536	38304	63840	1792	325	325	49609	15660	0	0.18	0.636	0.028	0.137	0.148	345029	589586	208485	340676	108227
Track_327	22	2	2	0	0	0	25536	38304	63840	3469	327	327	52731	20207	0	0.363	0.878	0.091	0.23	0.247	301026	505617	201009	292358	78653
Track_328	21	1	1	0	0	0	22344	38304	60648	1616	328	328	49939	45321	0	0.33	0.805	0.059	0.189	0.271	326690	511334	208856	303474	83100
Track_337	22	0	0	0	0	0	22344	41496	63840	0.157	337	337	46586	35004	0	0.107	0.369	0.03	0.089	0.08	270713	351573	207213	278789	42240
Track_339	15	2	2	0	0	0	18088	41496	59584	0.328	339	339	48071	21557	0	0.285	0.986	0.016	0.188	0.305	269974	405969	202777	255927	56263
Track_340	18	1	2	0	0	0	20216	41496	61712	1415	340	340	49244	47017	0	0.229	1255	0.026	0.147	0.286	375999	577192	210981	395039	117210
Track_345	20	1	1	0	0	0	21280	42560	63840	1316	345	345	50966	27398	0	0.289	1118	0.02	0.103	0.338	311314	526180	200089	304848	93736
Track_346	19	2	1	0	0	0	21280	42560	63840	0.184	346	346	46772	38228	0	0.311	0.939	0.043	0.234	0.276	263149	418813	200208	245636	57350
Track_347	14	1	1	0	0	0	14896	42560	57456	0.904	347	347	48603	37530	0	0.264	0.774	0.075	0.172	0.206	264236	353638	217772	260898	39046
Track_350	19	0	0	0	0	0	19152	44688	63840	0.874	350	350	48619	39464	0	0.287	0.952	0.057	0.219	0.252	290607	466310	219369	282951	63894
Track_355	10	2	2	0	0	0	12768	44688	57456	1001	355	355	52358	47970	0	0.237	0.843	0.044	0.164	0.247	236417	286084	210694	230625	24051
Track_358	17	2	1	0	0	0	19152	44688	63840	1235	358	358	49332	19346	0	0.16	0.612	0.016	0.103	0.166	353436	582715	202020	324666	106511
Track_359	19	0	0	0	0	0	19152	44688	63840	1966	359	359	56406	24092	0	0.191	0.663	0.017	0.107	0.205	496654	1029349	210618	424357	243608
Track_361	12	1	1	0	0	0	12768	45752	58520	1059	361	361	54862	15254	0	0.181	0.614	0.037	0.087	0.184	296966	543986	204357	274462	95996
Track_365	18	0	0	0	0	0	18088	45752	63840	0.949	365	365	57311	21567	0	0.209	0.797	0.029	0.104	0.241	502432	823704	200247	575012	216657
Track_367	16	2	1	0	0	0	18088	45752	63840	2275	367	367	51540	11740	0	0.288	1265	0.032	0.134	0.364	283067	540587	205305	237631	100252
Track_372	16	1	1	0	0	0	17024	46816	63840	0.211	372	372	50775	44501	0	0.369	1156	0.077	0.235	0.36	325974	530945	215955	316524	89152
Track_374	15	1	1	0	0	0	15960	47880	63840	0.988	374	374	49183	32155	0	0.369	1161	0.002	0.227	0.379	281981	461731	205672	261120	70382
Track_378	11	0	0	0	0	0	10640	48944	59584	0.258	378	378	46896	42247	0	0.185	0.686	0.055	0.151	0.183	338298	467380	217495	314306	94316
Track_379	12	0	0	0	0	0	11704	48944	60648	0.902	379	379	49347	21528	0	0.208	1047	0.008	0.138	0.288	277347	440031	206664	265372	59426
Track_392	11	1	1	0	0	0	11704	52136	63840	0.776	392	392	48534	30494	0	0.237	0.971	0.021	0.099	0.339	323720	540824	204768	309299	86241
Track_393	12	0	0	0	0	0	11704	52136	63840	0.505	393	393	50710	30820	0	0.168	0.267	0.061	0.162	0.062	410532	539566	241083	440823	86460
Track_395	8	2	2	0	0	0	10640	53200	63840	2755	395	395	54897	3791	0	0.403	0.939	0.013	0.221	0.384	228032	298635	201852	221984	28582

## Sheet: Control L1 animal 3
																Mean speed										Average
Track_0	16	2	1	0	0	0	18088	0	18088	1297	0	0	32485	82376	0	0.172	0.941	0.022	0.102	0.228	380309	612820	233533	361202	110560	0.299027
Track_1	12	0	0	0	0	0	11704	0	11704	1939	1	1	53934	65933	0	0.405	1359	0.022	0.251	0.44	311222	440028	207766	339410	69874
Track_3	31	3	2	0	0	0	37240	0	37240	4194	3	3	31895	82861	0	0.235	1095	0.034	0.179	0.203	356702	518656	208558	360192	83106
Track_9	13	0	0	0	0	0	12768	0	12768	1190	9	9	55273	66924	0	0.299	1094	0.034	0.227	0.282	355051	467544	214130	346374	76843
Track_10	37	4	2	0	0	0	43624	0	43624	3826	10	10	29118	82284	0	0.232	1121	0.018	0.184	0.228	356205	543600	208013	330996	100755
Track_13	24	1	2	0	0	0	26600	0	26600	0.697	13	13	36811	66068	0	0.311	1387	0.041	0.218	0.354	354765	571383	207997	334146	112713
Track_14	22	0	0	0	0	0	22344	0	22344	2484	14	14	37402	65308	0	0.235	1040	0.032	0.195	0.211	363813	588643	220445	378645	83120
Track_15	11	1	1	0	0	0	11704	0	11704	2055	15	15	54641	65307	0	0.277	0.916	0.006	0.264	0.254	294076	416170	211932	295888	59026
Track_17	11	0	0	0	0	0	10640	0	10640	0.375	17	17	39005	65714	0	0.173	0.418	0.046	0.165	0.112	350507	563520	216397	342944	100765
Track_18	11	0	0	0	0	0	10640	0	10640	1140	18	18	51509	65971	0	0.481	1002	0.083	0.721	0.403	242008	352972	201955	227827	43540
Track_19	44	1	1	0	0	0	46816	0	46816	1295	19	19	41064	65894	0	0.254	0.982	0.004	0.189	0.217	418753	847868	213368	384996	148132
Track_20	22	0	0	0	0	0	22344	0	22344	0.529	20	20	27600	88481	0	0.138	0.32	0.01	0.13	0.081	454908	735820	203795	457913	117647
Track_21	22	2	1	0	0	0	24472	0	24472	2320	21	21	25756	87807	0	0.336	1272	0.059	0.183	0.384	285286	489223	200604	256112	83768
Track_22	18	1	2	0	0	0	20216	1064	21280	5057	22	22	42441	69238	0	0.455	1231	0.034	0.308	0.382	387864	618098	211099	396342	119050
Track_25	29	1	2	0	0	0	31920	0	31920	2418	25	25	24080	90802	0	0.282	1137	0.043	0.239	0.246	325717	510822	200297	317415	89902
Track_27	23	0	0	0	0	0	23408	0	23408	2743	27	27	45359	67373	0	0.259	1015	0.05	0.202	0.221	396033	635528	206117	374859	118945
Track_30	14	1	1	0	0	0	14896	0	14896	1462	30	30	44642	60969	0	0.323	0.914	0.064	0.303	0.248	372636	606481	216170	354884	118982
Track_33	45	4	2	0	0	0	52136	0	52136	2528	33	33	43248	62190	0	0.265	0.833	0.043	0.236	0.147	374472	745672	212466	344604	128608
Track_35	45	2	1	0	0	0	48944	0	48944	1477	35	35	23860	91748	0	0.323	1262	0.036	0.232	0.306	330345	505083	208237	314014	82181
Track_36	22	0	0	0	0	0	22344	0	22344	2158	36	36	25660	92521	0	0.356	1314	0.021	0.23	0.373	318662	434574	214548	325583	63805
Track_39	25	1	1	0	0	0	26600	0	26600	0.987	39	39	39511	74099	0	0.23	0.658	0.032	0.196	0.18	296288	581752	207782	274395	84244
Track_40	13	3	2	0	0	0	18088	0	18088	1582	40	40	25821	92941	0	0.38	0.927	0.035	0.331	0.299	278682	451715	214981	264817	66428
Track_41	22	1	1	0	0	0	23408	0	23408	1943	41	41	22201	94157	0	0.245	1089	0.033	0.155	0.236	362937	596773	201330	331426	102349
Track_42	39	3	2	0	0	0	45752	0	45752	1569	42	42	38463	75248	0	0.419	1290	0.032	0.308	0.34	292326	429483	207846	277098	56578
Track_43	18	1	1	0	0	0	19152	0	19152	3449	43	43	41602	64278	0	0.49	1352	0.038	0.206	0.465	370754	774568	215839	284548	175511
Track_44	14	0	0	0	0	0	13832	0	13832	0.768	44	44	30622	80711	0	0.228	0.856	0.037	0.092	0.26	282391	380066	210588	291663	50708
Track_45	16	1	2	0	0	0	18088	0	18088	1521	45	45	40387	64509	0	0.359	1209	0.058	0.272	0.328	340779	625291	205891	291717	111067
Track_47	17	2	2	0	0	0	20216	0	20216	2500	47	47	61066	63682	0	0.184	0.316	0.043	0.186	0.076	366218	600909	205114	315702	115428
Track_48	11	0	0	0	0	0	10640	0	10640	2441	48	48	58634	64843	0	0.484	1052	0.044	0.558	0.401	249442	344036	204454	226841	42811
Track_50	25	1	1	0	0	0	26600	1064	27664	0.278	50	50	66759	63476	0	0.21	1071	0	0.141	0.228	296773	589241	202448	283192	92495
Track_52	16	1	1	0	0	0	17024	0	17024	1724	52	52	64268	61520	0	0.615	1312	0.115	0.347	0.486	342062	574991	204512	299373	121863
Track_53	15	1	2	0	0	0	17024	0	17024	2817	53	53	65195	60023	0	0.177	0.305	0.054	0.165	0.084	371110	608124	243561	302724	122597
Track_54	15	2	2	0	0	0	18088	0	18088	0.464	54	54	37130	78294	0	0.141	0.38	0.023	0.114	0.101	294879	417744	227149	281833	51874
Track_55	22	0	0	0	0	0	22344	0	22344	0.846	55	55	34405	78620	0	0.276	0.945	0.048	0.192	0.234	320873	530247	200873	334027	69742
Track_56	13	0	0	0	0	0	12768	0	12768	1523	56	56	59512	62898	0	0.284	0.706	0.042	0.244	0.196	363468	570053	222251	362580	85394
Track_58	20	1	1	0	0	0	21280	1064	22344	2622	58	58	32283	80082	0	0.457	1301	0.052	0.261	0.399	386417	645614	216039	377443	131686
Track_59	11	2	2	0	0	0	14896	0	14896	1774	59	59	35840	76966	0	0.299	0.783	0.039	0.241	0.268	320402	463702	232373	316846	68010
Track_70	32	2	1	0	0	0	35112	2128	37240	3445	70	70	62111	61950	0	0.314	1034	0.029	0.246	0.264	365798	631597	203423	337018	110920
Track_77	11	1	1	0	0	0	11704	2128	13832	1227	77	77	35194	66024	0	0.168	0.294	0.052	0.191	0.081	329562	511065	212927	293924	80947
Track_79	26	1	1	0	0	0	27664	2128	29792	3655	79	79	37705	73255	0	0.288	1233	0.04	0.181	0.295	339482	549048	218830	342160	90246
Track_80	13	2	2	0	0	0	15960	3192	19152	1453	80	80	66093	61125	0	0.253	0.987	0.022	0.195	0.256	362390	618913	203989	303386	138814
Track_82	11	1	1	0	0	0	11704	3192	14896	1166	82	82	37110	75800	0	0.395	1130	0.125	0.215	0.385	290702	413236	217726	270224	70250
Track_84	16	1	2	0	0	0	18088	3192	21280	0.817	84	84	52998	65767	0	0.608	1371	0.013	0.363	0.533	240748	304639	202394	243418	31591
Track_86	16	1	2	0	0	0	18088	4256	22344	2883	86	86	34608	77451	0	0.426	1328	0.051	0.24	0.407	302285	583469	203630	265150	96972
Track_87	43	2	2	0	0	0	47880	4256	52136	3074	87	87	40019	63837	0	0.325	1359	0.033	0.23	0.298	402042	692804	207651	404745	114754
Track_88	11	0	0	0	0	0	10640	4256	14896	1008	88	88	40309	72025	0	0.246	0.697	0.026	0.292	0.203	348908	517271	206314	306814	116724
Track_94	26	2	1	0	0	0	28728	5320	34048	6347	94	94	50349	66136	0	0.303	1336	0.037	0.239	0.267	425764	764167	209852	459865	150802
Track_95	13	0	0	0	0	0	12768	6384	19152	0.941	95	95	57161	65995	0	0.247	0.875	0.02	0.209	0.245	304818	484928	211413	291654	75335
Track_97	35	2	2	0	0	0	39368	5320	44688	2627	97	97	35925	66124	0	0.265	1383	0.029	0.24	0.234	365811	596280	211994	350861	107982
Track_101	31	2	2	0	0	0	35112	7448	42560	2435	101	101	27852	87396	0	0.225	1199	0.033	0.131	0.253	302058	450173	204634	290113	56586
Track_102	22	3	1	0	0	0	25536	7448	32984	2290	102	102	60962	65127	0	0.36	1040	0.038	0.285	0.308	301031	458129	201274	282517	66929
Track_103	13	2	1	0	0	0	14896	7448	22344	1500	103	103	26158	90240	0	0.516	1253	0.037	0.464	0.45	295255	439894	217237	254546	75962
Track_104	27	3	2	0	0	0	32984	8512	41496	2285	104	104	24310	94134	0	0.303	1164	0.074	0.212	0.234	331746	618384	201048	269506	121544
Track_107	19	0	0	0	0	0	19152	8512	27664	0.379	107	107	40551	66518	0	0.357	0.996	0.012	0.317	0.231	388439	625226	212018	370735	109808
Track_110	20	2	2	0	0	0	23408	8512	31920	4549	110	110	41175	74396	0	0.355	1225	0.059	0.279	0.333	263459	509797	207264	235516	78088
Track_113	16	4	2	0	0	0	21280	9576	30856	0.743	113	113	41496	75291	0	0.292	0.781	0.068	0.255	0.182	260537	363469	201065	253725	49454
Track_114	19	0	0	0	0	0	19152	9576	28728	2130	114	114	56634	62326	0	0.34	1306	0.017	0.274	0.358	343031	521471	208404	319910	88269
Track_116	19	1	1	0	0	0	20216	9576	29792	1313	116	116	24824	91633	0	0.406	1208	0.019	0.339	0.365	284497	555148	203862	270423	82304
Track_120	22	3	1	0	0	0	25536	7448	32984	1840	120	120	28290	84825	0	0.24	1393	0.081	0.158	0.286	353013	609680	207029	308456	98003
Track_126	9	1	2	0	0	0	10640	7448	18088	1340	126	126	59381	63868	0	0.293	1031	0.069	0.228	0.316	393528	657345	212961	318064	147129
Track_127	27	0	0	0	0	0	27664	11704	39368	1393	127	127	35280	77990	0	0.331	1270	0.069	0.242	0.29	304205	521433	201174	308868	87057
Track_128	15	2	2	0	0	0	18088	11704	29792	0.122	128	128	26448	85656	0	0.221	0.879	0.022	0.169	0.215	325896	494640	208308	320977	77791
Track_129	18	2	2	0	0	0	21280	11704	32984	0.692	129	129	52366	65903	0	0.618	1342	0.111	0.629	0.439	283785	539247	202283	236936	104206
Track_133	17	0	0	0	0	0	17024	11704	28728	2874	133	133	26727	90088	0	0.332	1185	0.011	0.233	0.288	360302	587573	216699	338437	110705
Track_134	12	0	0	0	0	0	11704	12768	24472	1306	134	134	43880	71244	0	0.292	1246	0.027	0.178	0.345	430633	547498	269865	444663	86725
Track_136	47	1	2	0	0	0	51072	12768	63840	3298	136	136	42517	72227	0	0.223	1115	0.011	0.163	0.222	402170	896848	200432	371405	142848
Track_139	17	1	1	0	0	0	18088	13832	31920	2163	139	139	42202	69078	0	0.304	0.628	0.015	0.284	0.173	270591	339983	200877	271106	46058
Track_145	12	0	0	0	0	0	11704	14896	26600	0.681	145	145	30476	84142	0	0.29	0.709	0.079	0.263	0.204	391775	677266	204704	373448	138151
Track_148	12	2	2	0	0	0	14896	14896	29792	0.784	148	148	30599	68948	0	0.21	0.639	0.022	0.155	0.193	317774	451853	207527	316761	75970
Track_154	14	1	2	0	0	0	15960	15960	31920	2354	154	154	37756	75074	0	0.363	1001	0.093	0.233	0.275	372502	775530	216030	387389	143499
Track_155	19	3	2	0	0	0	23408	15960	39368	2432	155	155	64509	63549	0	0.299	1395	0.058	0.219	0.34	274179	513397	207019	271239	67035
Track_159	16	1	1	0	0	0	17024	17024	34048	1648	159	159	62151	59984	0	0.246	0.504	0.071	0.241	0.138	321057	538859	218249	284201	101618
Track_163	14	2	1	0	0	0	15960	17024	32984	2966	163	163	50178	68728	0	0.408	1149	0.028	0.328	0.332	280240	510855	203835	255638	82988
Track_164	20	0	0	0	0	0	20216	17024	37240	1555	164	164	56730	66293	0	0.307	0.941	0.023	0.248	0.291	315313	539998	203013	303890	82721
Track_165	17	1	2	0	0	0	19152	19152	38304	0.96	165	165	41833	63638	0	0.221	0.442	0.08	0.215	0.118	317439	490897	212947	312047	71725
Track_167	14	0	0	0	0	0	13832	18088	31920	2428	167	167	41817	62210	0	0.275	0.527	0.091	0.284	0.141	418693	670335	243665	411388	106034
Track_171	9	2	1	0	0	0	10640	19152	29792	1515	171	171	45126	68763	0	0.239	0.501	0.037	0.236	0.136	319059	470164	220045	318493	76216
Track_172	11	1	1	0	0	0	11704	19152	30856	1939	172	172	23425	96706	0	0.311	0.719	0.134	0.201	0.212	317396	489404	200982	313441	77181
Track_173	27	1	1	0	0	0	28728	18088	46816	1688	173	173	43668	69876	0	0.208	0.658	0.049	0.161	0.152	456232	780599	248194	454192	149239
Track_174	13	2	1	0	0	0	14896	19152	34048	3770	174	174	45570	68458	0	0.375	0.839	0.08	0.374	0.187	321191	503347	211136	325809	86455
Track_178	10	1	1	0	0	0	10640	21280	31920	0.918	178	178	38020	64519	0	0.67	1225	0.309	0.589	0.337	261806	320294	207757	267287	39152
Track_179	10	1	2	0	0	0	11704	20216	31920	1742	179	179	28227	87894	0	0.392	1165	0.045	0.329	0.343	282442	385947	221193	290221	51953
Track_180	21	0	0	0	0	0	21280	20216	41496	0.585	180	180	25916	91351	0	0.329	0.935	0.023	0.294	0.239	318885	449053	202024	337659	82569
Track_182	27	4	1	0	0	0	31920	21280	53200	1963	182	182	50401	66293	0	0.3	1219	0.037	0.176	0.276	316982	670102	204896	261226	117300
Track_186	13	1	2	0	0	0	14896	22344	37240	2845	186	186	23617	93351	0	0.38	0.838	0.108	0.32	0.239	343518	572917	234534	329232	80798
Track_188	26	0	0	0	0	0	26600	22344	48944	4233	188	188	41369	61281	0	0.273	0.887	0.054	0.207	0.189	400698	598200	224437	434715	102287
Track_189	32	2	1	0	0	0	35112	22344	57456	0.903	189	189	35496	76348	0	0.365	0.998	0.041	0.286	0.275	297735	487462	202080	272013	78778
Track_197	13	0	0	0	0	0	12768	24472	37240	1964	197	197	59754	64204	0	0.332	0.81	0.098	0.305	0.234	301177	418451	212781	292517	63837
Track_200	29	0	0	0	0	0	29792	24472	54264	2490	200	200	31589	80872	0	0.233	0.712	0.015	0.21	0.164	352461	539158	203522	345286	77413
Track_206	13	1	1	0	0	0	13832	24472	38304	2639	206	206	45305	70739	0	0.328	1150	0.026	0.29	0.297	313603	456888	211109	285104	77092
Track_217	16	2	2	0	0	0	19152	26600	45752	0.764	217	217	39894	66072	0	0.362	1279	0.075	0.326	0.302	321119	495709	201619	313462	89971
Track_218	18	0	0	0	0	0	18088	26600	44688	0.985	218	218	39130	74296	0	0.163	0.571	0.015	0.116	0.146	329892	477314	213941	335409	92819
Track_219	16	1	1	0	0	0	17024	27664	44688	4250	219	219	21975	93559	0	0.388	1234	0.078	0.262	0.35	332464	489669	210952	312259	97160
Track_222	13	0	0	0	0	0	12768	27664	40432	1082	222	222	34529	76588	0	0.425	0.944	0.058	0.374	0.351	386794	764242	202533	349909	179549
Track_223	15	1	2	0	0	0	17024	28728	45752	1706	223	223	41933	69327	0	0.313	1153	0.089	0.211	0.286	331361	550328	201606	295690	112740
Track_228	10	1	2	0	0	0	11704	29792	41496	0.823	228	228	54553	64877	0	0.297	0.742	0.047	0.202	0.255	219924	240997	200181	223329	14420
Track_230	14	2	1	0	0	0	15960	29792	45752	2410	230	230	53605	66063	0	0.171	0.282	0.065	0.179	0.06	351488	491108	224748	336950	91423
Track_232	28	2	2	0	0	0	32984	29792	62776	2386	232	232	24192	92737	0	0.297	1239	0.043	0.216	0.27	314020	478436	200961	299037	73633
Track_237	20	2	1	0	0	0	22344	30856	53200	1199	237	237	61583	65106	0	0.237	0.971	0.039	0.133	0.249	331921	584264	222421	309093	92047
Track_240	19	3	2	0	0	0	23408	30856	54264	2288	240	240	46780	69109	0	0.299	1009	0.015	0.196	0.306	290097	463043	209528	274403	73750
Track_243	25	1	1	0	0	0	26600	31920	58520	4608	243	243	39443	66041	0	0.247	0.888	0.025	0.194	0.198	368417	572343	244439	363573	82460
Track_245	12	1	1	0	0	0	12768	31920	44688	0.193	245	245	33986	66371	0	0.233	0.599	0.111	0.162	0.174	294750	384734	214974	297835	52033
Track_250	13	0	0	0	0	0	12768	32984	45752	1955	250	250	34112	79444	0	0.286	1338	0.029	0.182	0.352	337794	541707	214378	347866	97493
Track_251	11	2	1	0	0	0	12768	34048	46816	0.526	251	251	26111	90018	0	0.43	1357	0.047	0.277	0.464	260601	316796	202519	260773	35065
Track_252	14	1	2	0	0	0	15960	34048	50008	1118	252	252	25611	93733	0	0.324	0.99	0.002	0.186	0.336	263017	342689	202066	251485	44557
Track_253	9	1	2	0	0	0	10640	34048	44688	0.915	253	253	66171	61977	0	0.21	0.389	0.02	0.201	0.132	264141	309092	233534	262631	23949
Track_254	24	1	1	0	0	0	25536	35112	60648	3230	254	254	54594	63482	0	0.263	1400	0.048	0.182	0.28	378413	660199	228153	344187	100738
Track_255	10	1	2	0	0	0	11704	35112	46816	1565	255	255	26964	86711	0	0.212	0.534	0.009	0.122	0.191	335680	496739	206991	361220	89262
Track_258	13	1	1	0	0	0	13832	35112	48944	2539	258	258	29087	82705	0	0.298	1403	0.041	0.202	0.365	370015	566327	210531	383745	94447
Track_259	27	1	1	0	0	0	28728	35112	63840	3637	259	259	51964	66202	0	0.345	1219	0.03	0.213	0.317	358854	604513	200297	366912	105300
Track_261	13	2	2	0	0	0	17024	36176	53200	3278	261	261	37220	76596	0	0.347	1024	0.078	0.287	0.302	292934	383125	201212	264079	66728
Track_262	19	0	0	0	0	0	19152	36176	55328	1571	262	262	35780	75111	0	0.18	0.376	0.008	0.212	0.09	371956	647283	207185	335229	117517
Track_264	9	2	2	0	0	0	11704	36176	47880	0.69	264	264	56040	67145	0	0.123	0.334	0.033	0.119	0.099	271958	334661	213647	274925	35670
Track_267	25	2	1	0	0	0	27664	36176	63840	4157	267	267	26292	88827	0	0.283	0.978	0.014	0.238	0.215	344403	516364	202320	371312	88778
Track_269	26	1	1	0	0	0	27664	36176	63840	4611	269	269	38732	74265	0	0.392	1272	0.082	0.237	0.38	301367	462142	205143	288149	75744
Track_270	22	2	1	0	0	0	24472	37240	61712	1247	270	270	44806	69888	0	0.37	1211	0.016	0.205	0.384	309576	479381	216689	305101	70283
Track_271	12	0	0	0	0	0	11704	37240	48944	1579	271	271	47671	69591	0	0.192	0.767	0.03	0.126	0.21	432282	657446	245628	443979	114926
Track_276	17	2	1	0	0	0	19152	37240	56392	2036	276	276	46102	67400	0	0.288	1177	0.056	0.164	0.332	310708	516855	203340	253158	90705
Track_282	10	1	1	0	0	0	10640	38304	48944	1720	282	282	27718	84636	0	0.211	0.446	0.071	0.196	0.116	365133	618063	205170	331732	126324
Track_284	19	4	1	0	0	0	23408	39368	62776	0.907	284	284	27675	88179	0	0.376	1128	0.083	0.283	0.325	268443	399295	202003	256892	52894
Track_288	11	1	1	0	0	0	11704	40432	52136	0.632	288	288	36725	65127	0	0.312	1136	0.06	0.255	0.32	331230	418643	205911	349106	64376
Track_289	17	4	2	0	0	0	23408	40432	63840	3611	289	289	57123	64017	0	0.359	1148	0.02	0.325	0.309	278374	404379	201892	264354	70978
Track_290	15	0	0	0	0	0	14896	40432	55328	1959	290	290	21681	94949	0	0.235	1292	0.067	0.175	0.315	351827	559369	246633	326006	93648
Track_292	16	0	0	0	0	0	15960	40432	56392	0.577	292	292	45330	68159	0	0.259	0.933	0.06	0.237	0.216	343506	516885	201225	313893	104910
Track_299	8	2	2	0	0	0	10640	41496	52136	0.179	299	299	30694	82210	0	0.228	0.462	0.066	0.139	0.176	233089	286152	211313	230429	21850
Track_300	21	0	0	0	0	0	21280	42560	63840	1495	300	300	23989	93848	0	0.228	0.776	0.058	0.167	0.191	365543	591536	226651	340651	92542
Track_307	9	2	2	0	0	0	11704	43624	55328	0.632	307	307	63269	64475	0	0.133	0.194	0.04	0.181	0.061	261282	295092	223365	261744	22084
Track_308	15	1	2	0	0	0	17024	43624	60648	1593	308	308	37294	66407	0	0.219	0.541	0.06	0.18	0.149	321539	463043	236855	303695	65589
Track_311	10	1	1	0	0	0	10640	43624	54264	0.917	311	311	47903	69807	0	0.261	0.838	0.053	0.196	0.235	334977	569269	209632	320314	107409
Track_316	14	0	0	0	0	0	13832	44688	58520	2039	316	316	65113	60063	0	0.281	1183	0.043	0.212	0.287	411779	644121	221530	415516	123917
Track_317	18	1	1	0	0	0	19152	44688	63840	1238	317	317	34386	78807	0	0.283	0.984	0.019	0.21	0.246	290543	436644	204066	273872	70676
Track_321	18	0	0	0	0	0	18088	45752	63840	2922	321	321	41143	62477	0	0.235	0.554	0.05	0.214	0.137	425700	684067	232914	405426	137483
Track_323	10	1	1	0	0	0	10640	45752	56392	0.752	323	323	52993	67664	0	0.276	0.537	0.114	0.202	0.167	316751	414906	214768	324790	74371
Track_324	16	1	1	0	0	0	17024	46816	63840	0.172	324	324	28145	87073	0	0.178	0.463	0.043	0.118	0.142	349314	599821	204679	340339	99410
Track_326	12	1	1	0	0	0	12768	46816	59584	1337	326	326	23851	90665	0	0.162	0.283	0.037	0.148	0.082	336055	626843	200632	313307	105615
Track_328	15	0	0	0	0	0	14896	46816	61712	1433	328	328	25867	91571	0	0.472	1396	0.078	0.253	0.428	257176	404304	200906	221506	64559
Track_330	13	1	1	0	0	0	13832	47880	61712	0.756	330	330	31035	79410	0	0.166	0.283	0.043	0.166	0.079	355543	514934	216563	358787	89971
Track_331	11	0	0	0	0	0	10640	47880	58520	1528	331	331	43907	61009	0	0.219	0.347	0.106	0.202	0.077	531157	837279	240321	596689	176196
Track_333	15	1	1	0	0	0	15960	47880	63840	1164	333	333	23314	90090	0	0.204	0.408	0.07	0.18	0.092	332382	490824	206367	329328	80891
Track_334	16	0	0	0	0	0	15960	47880	63840	1197	334	334	39973	73466	0	0.319	0.889	0.041	0.256	0.25	312735	508053	202327	298498	73793
Track_339	11	0	0	0	0	0	10640	50008	60648	2233	339	339	62046	61466	0	0.248	0.535	0.038	0.239	0.144	414287	755261	207703	367341	152422
Track_342	12	2	1	0	0	0	13832	50008	63840	0.262	342	342	41793	70430	0	0.267	1301	0.042	0.168	0.356	345047	550070	219861	337381	101945
Track_346	14	0	0	0	0	0	13832	50008	63840	2360	346	346	60048	63217	0	0.22	0.482	0.044	0.203	0.129	385982	676866	207132	383883	133612
Track_350	13	0	0	0	0	0	12768	51072	63840	1458	350	350	40737	67152	0	0.282	1123	0.044	0.196	0.29	358372	509207	270414	327737	81568
Track_352	13	0	0	0	0	0	12768	51072	63840	1395	352	352	39469	74275	0	0.227	1005	0.017	0.165	0.264	325396	421577	251988	324155	46396
Track_360	10	1	1	0	0	0	10640	53200	63840	0.805	360	360	32932	79637	0	0.413	1242	0.092	0.239	0.445	278558	383349	212778	257832	63157
Track_361	11	0	0	0	0	0	10640	53200	63840	0.921	361	361	62254	62702	0	0.22	0.648	0.084	0.19	0.163	274018	393742	200338	253350	64769

## Sheet: Control L1 animal 4
																Mean speed										Average
Track_2	52	1	1	0	0	0	55328	0	55328	6908	2	2	61138	32012	0	0.255	1237	0.022	0.202	0.205	480423	986493	203953	471190	212610	0.314212
Track_4	23	3	2	0	0	0	27664	0	27664	0.26	4	4	63788	30926	0	0.242	1088	0.029	0.191	0.228	377669	704183	208848	367944	138912
Track_5	16	0	0	0	0	0	15960	0	15960	2527	5	5	68391	30390	0	0.308	0.728	0.062	0.296	0.215	403412	914413	209538	352584	187282
Track_6	14	0	0	0	0	0	13832	0	13832	1968	6	6	63805	30243	0	0.352	0.963	0.041	0.33	0.249	487284	911776	206188	493132	209732
Track_8	13	0	0	0	0	0	12768	0	12768	1377	8	8	62089	31323	0	0.339	0.777	0.081	0.311	0.196	349875	611558	212781	349620	109193
Track_9	30	1	2	0	0	0	32984	0	32984	5846	9	9	77632	33314	0	0.352	1183	0.082	0.288	0.255	409267	745744	217807	384589	150738
Track_11	25	2	1	0	0	0	27664	0	27664	3941	11	11	73029	29920	0	0.226	0.474	0.042	0.229	0.124	409622	669115	201834	412701	138722
Track_12	12	0	0	0	0	0	11704	0	11704	1171	12	12	57460	34565	0	0.523	1248	0.163	0.437	0.346	355455	628180	217241	308970	139463
Track_13	49	1	1	0	0	0	52136	0	52136	5208	13	13	77519	32043	0	0.377	1321	0.07	0.315	0.256	468609	889225	213262	427076	191732
Track_15	21	2	2	0	0	0	24472	0	24472	0.427	15	15	80598	35106	0	0.376	0.917	0.051	0.316	0.246	376774	787677	204328	335724	165710
Track_16	11	2	1	0	0	0	12768	0	12768	1208	16	16	55296	35655	0	0.55	1342	0.07	0.399	0.547	239583	357128	200648	214915	45474
Track_18	14	1	1	0	0	0	14896	0	14896	3139	18	18	55809	34359	0	0.493	1393	0.187	0.336	0.369	470748	783312	212546	531253	182743
Track_19	10	1	2	0	0	0	11704	0	11704	0.222	19	19	51614	43108	0	0.125	0.247	0.038	0.091	0.075	268832	335176	204047	270145	36734
Track_20	40	3	1	0	0	0	44688	0	44688	2021	20	20	47741	43965	0	0.257	0.745	0.026	0.233	0.152	370116	710273	201126	359761	116658
Track_23	39	1	2	0	0	0	42560	0	42560	0.734	23	23	50591	47760	0	0.297	1309	0.044	0.252	0.23	433529	784539	200864	424749	172413
Track_30	17	1	2	0	0	0	19152	0	19152	2808	30	30	52468	37190	0	0.498	1392	0.089	0.324	0.418	318552	628022	201001	260451	121527
Track_32	12	1	1	0	0	0	12768	0	12768	1440	32	32	51755	39290	0	0.302	0.923	0.11	0.253	0.225	299914	485754	214462	289157	84589
Track_33	19	1	1	0	0	0	20216	0	20216	4097	33	33	50651	41922	0	0.252	0.4	0.146	0.247	0.09	489936	813723	254821	476701	156628
Track_37	16	1	1	0	0	0	17024	0	17024	2884	37	37	68804	28228	0	0.308	1104	0.03	0.174	0.284	387485	565970	211456	377409	116017
Track_39	22	1	1	0	0	0	23408	0	23408	4124	39	39	75421	30802	0	0.378	0.927	0.022	0.325	0.226	473501	891472	202938	483932	180645
Track_40	36	0	0	0	0	0	37240	0	37240	0.273	40	40	66566	30663	0	0.264	1018	0.043	0.197	0.227	367300	632907	209472	351090	112142
Track_43	46	3	2	0	0	0	53200	0	53200	2664	43	43	62868	27971	0	0.352	1182	0.019	0.285	0.302	366811	607251	201494	370921	122360
Track_48	10	1	1	0	0	0	10640	0	10640	1803	48	48	51230	60932	0	0.404	1244	0.038	0.306	0.381	316047	520937	201727	271384	104197
Track_52	17	2	1	0	0	0	19152	0	19152	2650	52	52	50626	64085	0	0.249	1180	0.041	0.231	0.263	309924	531192	200878	284543	98831
Track_57	10	1	1	0	0	0	10640	1064	11704	2247	57	57	79529	31099	0	0.413	0.752	0.212	0.324	0.199	445181	887060	208889	349059	242646
Track_59	16	1	2	0	0	0	18088	2128	20216	0.858	59	59	53040	64200	0	0.154	0.293	0.033	0.158	0.077	273900	403547	200017	259082	62353
Track_61	17	1	1	0	0	0	18088	2128	20216	0.455	61	61	62053	31658	0	0.356	1209	0.036	0.267	0.328	354701	708540	206201	323214	110465
Track_62	21	1	2	0	0	0	23408	2128	25536	0.365	62	62	59235	32894	0	0.24	0.521	0.072	0.24	0.126	464128	897644	211758	436434	185981
Track_63	13	0	0	0	0	0	12768	2128	14896	1610	63	63	53362	39343	0	0.244	1027	0.087	0.161	0.259	434601	785620	218225	403802	169547
Track_66	10	2	2	0	0	0	12768	3192	15960	1668	66	66	67448	28743	0	0.466	1296	0.18	0.26	0.381	257583	308872	201774	265123	37603
Track_67	13	0	0	0	0	0	12768	3192	15960	3467	67	67	77613	30460	0	0.327	0.622	0.133	0.306	0.156	427829	723972	202491	403677	163012
Track_72	9	2	2	0	0	0	11704	4256	15960	1931	72	72	69924	30657	0	0.382	1306	0.03	0.316	0.397	243951	304272	207984	240271	32592
Track_76	11	0	0	0	0	0	10640	5320	15960	2169	76	76	55925	31896	0	0.256	0.482	0.068	0.285	0.122	379840	571115	297529	355091	82276
Track_78	24	1	1	0	0	0	25536	5320	30856	5131	78	78	52903	38673	0	0.421	1150	0.125	0.289	0.327	374984	622951	212392	349205	121291
Track_81	33	2	1	0	0	0	36176	6384	42560	6332	81	81	79171	32264	0	0.316	0.855	0.125	0.291	0.188	414558	718436	202619	396560	127890
Track_85	17	1	1	0	0	0	18088	7448	25536	4657	85	85	68402	27755	0	0.321	1009	0.038	0.238	0.234	400855	927549	215248	353637	177173
Track_88	18	1	1	0	0	0	19152	8512	27664	4514	88	88	54069	34772	0	0.279	0.513	0.092	0.265	0.116	399513	531901	282365	418405	69245
Track_94	18	0	0	0	0	0	18088	9576	27664	3836	94	94	51452	63933	0	0.35	1313	0.005	0.339	0.29	378096	769307	208482	322705	175128
Track_98	32	2	1	0	0	0	35112	9576	44688	6383	98	98	66874	27055	0	0.321	0.706	0.049	0.322	0.152	448383	1043552	206681	386921	196745
Track_99	17	0	0	0	0	0	17024	10640	27664	2485	99	99	57561	34856	0	0.289	0.628	0.02	0.324	0.178	362244	504587	233956	345989	79183
Track_102	13	0	0	0	0	0	12768	10640	23408	2093	102	102	49782	56390	0	0.233	0.483	0.047	0.243	0.126	413978	594380	212394	384095	119370
Track_103	16	0	0	0	0	0	15960	10640	26600	2525	103	103	50910	40418	0	0.335	1377	0.076	0.244	0.314	434359	618973	213717	471330	122178
Track_107	13	0	0	0	0	0	12768	11704	24472	0.376	107	107	64799	29449	0	0.437	1294	0.151	0.3	0.371	399303	747377	201530	401711	167345
Track_113	27	2	1	0	0	0	29792	13832	43624	0.988	113	113	50561	52498	0	0.184	0.715	0.024	0.148	0.147	302823	521245	207882	289655	79170
Track_115	44	2	1	0	0	0	47880	14896	62776	6690	115	115	49762	51759	0	0.263	1202	0.035	0.243	0.207	384665	837757	201269	374378	140772
Track_120	24	1	2	0	0	0	26600	15960	42560	0.742	120	120	48832	62555	0	0.231	0.557	0.008	0.166	0.167	381280	688692	207029	387969	129613
Track_122	15	0	0	0	0	0	14896	15960	30856	1987	122	122	47585	51336	0	0.241	1036	0.028	0.179	0.247	553390	806653	218703	546053	153920
Track_126	15	1	1	0	0	0	15960	19152	35112	5274	126	126	59119	31146	0	0.429	0.942	0.148	0.371	0.239	441588	717322	236766	428935	151847
Track_129	37	3	2	0	0	0	44688	19152	63840	5447	129	129	64079	29523	0	0.337	1170	0.061	0.299	0.224	469062	738161	210284	477232	154951
Track_131	22	1	1	0	0	0	23408	18088	41496	1745	131	131	74316	31382	0	0.24	0.796	0.074	0.177	0.176	315399	565072	202148	324046	78544
Track_134	16	2	2	0	0	0	19152	20216	39368	0.658	134	134	74166	32394	0	0.277	0.92	0.015	0.175	0.274	306193	455760	216826	294127	78876
Track_136	27	1	1	0	0	0	28728	20216	48944	2145	136	136	50975	62684	0	0.285	1231	0.016	0.205	0.298	361471	601308	203801	365154	91358
Track_139	23	1	2	0	0	0	25536	21280	46816	2285	139	139	50708	59779	0	0.261	1211	0.054	0.207	0.244	336457	619940	210384	324045	91797
Track_141	14	1	1	0	0	0	14896	21280	36176	2266	141	141	47422	48220	0	0.237	0.704	0.051	0.207	0.178	310552	455437	207930	285334	90603
Track_142	12	1	1	0	0	0	12768	21280	34048	0.86	142	142	50376	49175	0	0.23	0.596	0.095	0.205	0.15	302128	568769	210897	244788	116553
Track_143	28	4	2	0	0	0	34048	22344	56392	1799	143	143	50888	56906	0	0.203	1161	0.02	0.142	0.227	326514	731148	201360	310497	114353
Track_144	12	0	0	0	0	0	11704	21280	32984	1179	144	144	75755	30917	0	0.485	1136	0.072	0.294	0.393	336560	461366	265037	308767	67454
Track_149	11	0	0	0	0	0	10640	23408	34048	1741	149	149	63733	28024	0	0.331	0.63	0.098	0.339	0.193	482992	972152	215840	445813	228358
Track_152	25	0	0	0	0	0	25536	24472	50008	1721	152	152	60019	32072	0	0.315	1099	0.037	0.223	0.257	428539	961117	209830	411596	164794
Track_155	17	0	0	0	0	0	17024	23408	40432	1983	155	155	50890	46001	0	0.228	0.915	0.042	0.126	0.25	284487	434113	201364	258436	74906
Track_161	21	3	1	0	0	0	24472	26600	51072	3219	161	161	66748	28894	0	0.255	0.836	0.036	0.19	0.205	360510	588302	205646	359993	106172
Track_164	12	1	1	0	0	0	12768	23408	36176	0.907	164	164	50454	51735	0	0.322	0.976	0.035	0.169	0.331	287051	435321	201096	283984	78818
Track_170	15	2	1	0	0	0	17024	27664	44688	2319	170	170	49596	61401	0	0.256	0.715	0.063	0.245	0.161	370692	488547	251494	374924	81649
Track_171	28	0	0	0	0	0	28728	27664	56392	3415	171	171	51498	40901	0	0.205	0.539	0.024	0.186	0.11	376729	594796	240647	370767	106304
Track_175	10	2	2	0	0	0	12768	23408	36176	0.127	175	175	51946	37029	0	0.253	0.845	0.084	0.144	0.244	398427	604728	254230	408783	123798
Track_179	18	0	0	0	0	0	18088	28728	46816	1665	179	179	48514	45534	0	0.29	1205	0.092	0.215	0.26	445633	799394	200524	452924	146224
Track_181	17	1	1	0	0	0	18088	29792	47880	1227	181	181	78430	34123	0	0.226	0.529	0.035	0.222	0.148	304439	441269	218595	286206	57457
Track_184	22	0	0	0	0	0	22344	29792	52136	0.979	184	184	58495	33628	0	0.408	1105	0.094	0.258	0.315	341701	879651	200154	314352	171117
Track_185	17	2	2	0	0	0	20216	29792	50008	0.863	185	185	50607	47170	0	0.408	1394	0.054	0.312	0.385	281358	533915	207564	253331	78983
Track_190	17	1	1	0	0	0	18088	31920	50008	1476	190	190	55134	34827	0	0.381	1396	0.095	0.273	0.362	351139	752090	211016	315279	130547
Track_194	27	2	2	0	0	0	30856	32984	63840	4481	194	194	48977	46812	0	0.389	1138	0.064	0.298	0.311	423627	635078	201969	450881	125228
Track_199	11	1	1	0	0	0	11704	34048	45752	1687	199	199	56646	31604	0	0.372	1064	0.101	0.318	0.324	258593	394464	204328	246032	55315
Track_200	11	0	0	0	0	0	10640	34048	44688	1511	200	200	59104	30905	0	0.376	1036	0.073	0.306	0.269	491812	720777	219788	534492	153441
Track_201	20	1	1	0	0	0	21280	35112	56392	1806	201	201	66847	29557	0	0.464	1377	0.057	0.35	0.385	433872	803854	214827	412107	167305
Track_202	24	3	1	0	0	0	27664	34048	61712	0.221	202	202	54483	37785	0	0.271	0.811	0.077	0.185	0.21	315124	598620	202499	285201	99711
Track_203	24	2	1	0	0	0	26600	34048	60648	2876	203	203	49275	41375	0	0.294	1065	0.056	0.208	0.249	336257	626841	201049	305450	114199
Track_204	24	0	0	0	0	0	24472	34048	58520	3501	204	204	54031	34829	0	0.292	0.937	0.058	0.257	0.219	376992	580334	209478	362844	105602
Track_205	26	1	1	0	0	0	27664	34048	61712	1920	205	205	71247	30506	0	0.357	1304	0.046	0.237	0.364	360852	625375	202221	364770	114102
Track_207	19	0	0	0	0	0	19152	36176	55328	4186	207	207	66431	26943	0	0.276	0.557	0.089	0.295	0.155	490856	793381	309124	491097	132462
Track_215	13	1	1	0	0	0	13832	40432	54264	1824	215	215	49795	52518	0	0.226	0.519	0.055	0.239	0.124	355656	431811	252917	386456	58536
Track_218	14	0	0	0	0	0	13832	39368	53200	3138	218	218	73625	30477	0	0.266	0.545	0.084	0.288	0.131	458556	662557	309536	474507	100619
Track_221	12	0	0	0	0	0	11704	41496	53200	2506	221	221	75061	29353	0	0.226	0.371	0.079	0.232	0.082	329100	430771	242121	343201	59964
Track_222	19	3	1	0	0	0	22344	41496	63840	2218	222	222	61597	31764	0	0.278	1404	0.029	0.228	0.321	356464	684017	215356	299551	126250
Track_224	8	2	2	0	0	0	10640	41496	52136	0.775	224	224	56333	35207	0	0.544	1352	0.128	0.328	0.524	225697	254500	207487	228821	16292
Track_225	20	0	0	0	0	0	20216	41496	61712	3457	225	225	51565	65075	0	0.217	0.434	0.019	0.196	0.122	324946	705937	233242	287650	109871
Track_226	20	1	1	0	0	0	21280	42560	63840	3569	226	226	49227	53834	0	0.185	0.419	0.032	0.194	0.094	450794	617776	296425	444814	91775
Track_227	12	3	2	0	0	0	15960	39368	55328	1581	227	227	68171	27947	0	0.16	0.417	0.047	0.149	0.121	309530	638453	212532	269116	120749
Track_229	11	2	1	0	0	0	12768	42560	55328	0.617	229	229	58952	33278	0	0.55	1206	0.012	0.765	0.443	229063	292246	207676	222213	24440
Track_232	10	1	1	0	0	0	10640	43624	54264	2091	232	232	80778	33121	0	0.246	0.499	0.072	0.205	0.154	336747	408865	209375	357852	57502
Track_238	18	1	1	0	0	0	19152	44688	63840	1332	238	238	68922	30916	0	0.351	0.969	0.044	0.245	0.307	411334	702749	237083	371467	150231
Track_241	18	1	2	0	0	0	20216	43624	63840	1552	241	241	76327	31091	0	0.336	1018	0.066	0.267	0.256	329419	539363	225968	304916	78826
Track_250	15	1	1	0	0	0	15960	47880	63840	1531	250	250	55494	36590	0	0.244	0.431	0.042	0.269	0.129	313031	477770	205050	293485	81804
Track_251	13	1	1	0	0	0	13832	47880	61712	4914	251	251	60650	29868	0	0.405	1246	0.058	0.255	0.364	457857	718468	225590	481009	155093
Track_262	14	0	0	0	0	0	13832	50008	63840	3055	262	262	50289	61177	0	0.247	0.454	0.028	0.271	0.108	348855	506971	220111	353024	73475
Track_265	12	0	0	0	0	0	11704	51072	62776	0.418	265	265	56377	32475	0	0.371	1222	0.059	0.159	0.42	386250	616633	233326	412058	139536
Track_266	13	0	0	0	0	0	12768	51072	63840	2857	266	266	51334	40991	0	0.25	0.402	0.067	0.287	0.103	317995	470427	205938	288926	79451
Track_272	11	1	1	0	0	0	11704	52136	63840	1241	272	272	50157	51878	0	0.222	0.519	0.085	0.22	0.121	339795	523231	223920	284451	106275
Track_275	11	0	0	0	0	0	10640	53200	63840	0.954	275	275	66256	30843	0	0.361	0.974	0.028	0.28	0.346	252154	326634	210583	249000	32697
Track_276	10	1	1	0	0	0	10640	53200	63840	1053	276	276	82228	31936	0	0.331	1387	0.138	0.169	0.401	431785	672494	232485	473660	143856

## Sheet: Auxin L1 animal 1
																Mean speed										Average
Track_3	11	1	1	0	0	0	11704	0	11704	2316	3	3	85253	29412	0	0.276	0.591	0.078	0.227	0.157	476969	693825	205189	528702	149522	0.28034
Track_5	12	0	0	0	0	0	11704	0	11704	1765	5	5	88947	26778	0	0.307	0.753	0.043	0.157	0.269	296331	514780	210006	257161	89499
Track_6	13	0	0	0	0	0	12768	0	12768	2475	6	6	81441	25072	0	0.22	0.434	0.031	0.23	0.093	420200	651256	217508	395823	117797
Track_7	23	0	0	0	0	0	23408	0	23408	5389	7	7	88678	29776	0	0.322	0.704	0.081	0.301	0.175	522089	854528	315017	494794	148534
Track_9	12	0	0	0	0	0	11704	0	11704	3470	9	9	67035	24288	0	0.339	0.492	0.042	0.378	0.146	581997	938686	235021	590718	226106
Track_10	19	1	1	0	0	0	20216	0	20216	0.706	10	10	84873	23461	0	0.206	0.475	0.039	0.187	0.12	356722	579409	206792	341581	103984
Track_11	13	0	0	0	0	0	12768	0	12768	1684	11	11	57724	24314	0	0.194	0.348	0.017	0.21	0.091	539445	828831	291430	516270	196002
Track_15	21	1	1	0	0	0	22344	0	22344	3230	15	15	81083	22535	0	0.226	0.644	0.059	0.191	0.168	362730	545565	215468	383129	105531
Track_25	14	1	1	0	0	0	14896	0	14896	2515	25	25	64262	25269	0	0.233	0.507	0.044	0.188	0.143	473717	874077	202587	428892	221847
Track_26	14	1	1	0	0	0	14896	0	14896	0.654	26	26	96593	30953	0	0.365	1329	0.026	0.253	0.37	307138	568069	209119	261852	114233
Track_30	15	2	2	0	0	0	18088	2128	20216	0.04	30	30	87585	24652	0	0.227	1030	0.008	0.149	0.262	311985	465858	201237	305682	70259
Track_32	19	0	0	0	0	0	19152	1064	20216	0.508	32	32	83769	22855	0	0.179	0.445	0.017	0.153	0.129	327069	519975	221456	323524	73960
Track_36	12	1	1	0	0	0	12768	2128	14896	1810	36	36	89945	26517	0	0.313	0.938	0.067	0.208	0.29	308936	428606	227743	297787	67112
Track_38	8	2	2	0	0	0	10640	4256	14896	1201	38	38	67841	26003	0	0.183	0.287	0.032	0.181	0.084	385330	610662	211665	398741	115094
Track_42	19	1	2	0	0	0	21280	4256	25536	3349	42	42	84883	23773	0	0.236	0.515	0.033	0.211	0.157	434683	1001286	217972	403552	179137
Track_46	20	3	2	0	0	0	24472	3192	27664	0.417	46	46	52939	27146	0	0.119	0.297	0.022	0.111	0.076	265496	335347	203703	255862	36054
Track_51	18	1	2	0	0	0	20216	6384	26600	1139	51	51	91847	28334	0	0.471	1402	0.072	0.267	0.456	290498	400224	205248	292141	62111
Track_52	21	1	1	0	0	0	22344	6384	28728	2025	52	52	88344	25367	0	0.41	1114	0.071	0.286	0.342	333364	500796	201641	339952	92647
Track_53	10	1	2	0	0	0	11704	7448	19152	1478	53	53	89471	27744	0	0.212	0.489	0.025	0.152	0.173	300718	382102	211957	311765	64970
Track_59	14	1	1	0	0	0	14896	8512	23408	5050	59	59	69426	21648	0	0.398	0.838	0.184	0.351	0.194	540622	1079886	303836	512396	195141
Track_60	36	2	2	0	0	0	41496	8512	50008	8681	60	60	55114	26639	0	0.363	0.919	0.017	0.336	0.223	517376	789997	200094	520094	157548
Track_63	8	2	2	0	0	0	10640	9576	20216	0.318	63	63	86621	24100	0	0.176	0.273	0.05	0.191	0.085	273973	377248	203672	267497	55242
Track_69	24	3	2	0	0	0	28728	11704	40432	0.794	69	69	90659	26798	0	0.241	0.97	0.049	0.158	0.258	334432	532485	211771	318527	89038
Track_71	11	0	0	0	0	0	10640	12768	23408	3932	71	71	99458	36089	0	0.431	0.718	0.247	0.429	0.15	493506	648641	277589	484750	111189
Track_73	11	0	0	0	0	0	10640	12768	23408	0.239	73	73	98895	33404	0	0.461	1341	0.032	0.329	0.419	273027	388607	201570	277190	55450
Track_77	9	1	2	0	0	0	10640	13832	24472	2742	77	77	45686	35952	0	0.419	0.999	0.134	0.412	0.29	544372	831390	204815	536797	214777
Track_79	20	0	0	0	0	0	20216	13832	34048	5455	79	79	48036	35622	0	0.322	0.633	0.038	0.332	0.156	661107	1045484	451576	639791	144154
Track_80	18	1	1	0	0	0	19152	13832	32984	2705	80	80	62682	26283	0	0.325	0.794	0.07	0.305	0.162	509350	946020	216377	486723	206929
Track_81	22	0	0	0	0	0	22344	13832	36176	6662	81	81	62132	27732	0	0.336	0.606	0.121	0.335	0.117	519737	851541	215187	570861	178153
Track_83	15	2	1	0	0	0	17024	15960	32984	3092	83	83	87158	27306	0	0.346	0.905	0.069	0.341	0.259	338897	674095	206594	273978	133227
Track_88	17	0	0	0	0	0	17024	17024	34048	1148	88	88	81596	22478	0	0.406	0.986	0.026	0.415	0.277	307548	581882	215788	264543	97516
Track_89	16	0	0	0	0	0	15960	17024	32984	3200	89	89	46330	35305	0	0.351	0.762	0.07	0.335	0.169	427565	969932	232354	359451	213697
Track_96	19	1	1	0	0	0	20216	18088	38304	4021	96	96	65597	24771	0	0.302	0.745	0.083	0.275	0.171	436147	883096	204811	452592	212055
Track_97	10	1	1	0	0	0	10640	18088	28728	0.545	97	97	87444	28900	0	0.194	0.351	0.015	0.207	0.108	360449	638636	200320	339496	129304
Track_105	22	2	2	0	0	0	25536	20216	45752	4230	105	105	45695	35125	0	0.295	0.439	0.067	0.303	0.103	485804	842661	206105	453976	155265
Track_107	16	2	2	0	0	0	19152	21280	40432	2313	107	107	90228	27006	0	0.376	1255	0.05	0.281	0.359	287408	468239	201914	267981	72718
Track_113	13	2	1	0	0	0	14896	22344	37240	0.307	113	113	89577	27674	0	0.514	1114	0.176	0.412	0.349	296414	441929	225500	279201	63740
Track_116	23	3	2	0	0	0	27664	22344	50008	2931	116	116	71074	22003	0	0.388	1331	0.023	0.207	0.387	388972	783415	200350	346778	162661
Track_124	36	1	1	0	0	0	38304	25536	63840	2407	124	124	86333	24634	0	0.331	1279	0.023	0.276	0.3	398744	734137	202169	360239	148071
Track_126	30	3	1	0	0	0	34048	25536	59584	0.237	126	126	86356	23911	0	0.296	1168	0.017	0.183	0.295	303550	462913	206781	283682	72191
Track_127	18	1	2	0	0	0	20216	25536	45752	4176	127	127	53126	27193	0	0.348	1123	0.044	0.247	0.288	439421	655758	201140	419277	141300
Track_128	14	1	1	0	0	0	14896	25536	40432	0.993	128	128	82011	22231	0	0.228	0.646	0.042	0.2	0.178	374246	667842	209240	408545	117941
Track_130	23	1	1	0	0	0	24472	26600	51072	5187	130	130	74284	21266	0	0.252	0.408	0.121	0.249	0.08	372573	566195	253578	353729	86249
Track_135	10	2	2	0	0	0	12768	26600	39368	2361	135	135	91099	29341	0	0.394	0.713	0.048	0.345	0.264	235749	287616	202750	231136	25638
Track_137	13	2	2	0	0	0	15960	27664	43624	0.323	137	137	88747	28734	0	0.413	1174	0.046	0.425	0.383	299011	454364	209452	283561	81679
Track_140	22	3	2	0	0	0	26600	27664	54264	2114	140	140	45066	34192	0	0.176	0.562	0.019	0.134	0.144	269228	410458	203766	251048	62659
Track_143	23	0	0	0	0	0	23408	28728	52136	3765	143	143	67378	23358	0	0.247	0.998	0.035	0.243	0.194	448053	725089	206014	461155	144085
Track_144	19	0	0	0	0	0	19152	28728	47880	2995	144	144	64760	23979	0	0.326	0.943	0.074	0.238	0.246	412855	707582	218746	409547	129814
Track_145	11	0	0	0	0	0	10640	29792	40432	2318	145	145	85095	29136	0	0.376	0.821	0.2	0.313	0.19	451882	753740	204883	465921	158739
Track_149	29	0	0	0	0	0	29792	34048	63840	0.139	149	149	85027	23318	0	0.146	0.62	0.016	0.103	0.153	368458	598569	204735	373005	99509
Track_150	21	1	2	0	0	0	23408	34048	57456	3900	150	150	78094	21483	0	0.256	0.972	0.008	0.236	0.211	411432	750042	256933	404982	110308
Track_151	19	0	0	0	0	0	19152	34048	53200	1927	151	151	63790	23119	0	0.304	0.986	0.088	0.249	0.24	406861	607750	206330	388254	121302
Track_152	19	2	2	0	0	0	22344	35112	57456	0.111	152	152	83790	22745	0	0.206	0.632	0.012	0.134	0.188	320757	513633	216263	297632	81851
Track_153	12	0	0	0	0	0	11704	36176	47880	2620	153	153	98256	35962	0	0.263	0.467	0.03	0.295	0.144	490049	688188	267840	521950	122541
Track_164	21	0	0	0	0	0	21280	40432	61712	4836	164	164	67931	23730	0	0.262	0.579	0.021	0.252	0.166	471424	718288	271039	464009	126165
Track_165	13	0	0	0	0	0	12768	40432	53200	1004	165	165	86991	27436	0	0.411	1123	0.131	0.309	0.284	414961	825314	200668	397000	186924
Track_167	11	0	0	0	0	0	10640	40432	51072	2638	167	167	94366	30229	0	0.295	0.557	0.029	0.337	0.172	370981	479412	255807	360823	61270
Track_168	20	2	1	0	0	0	22344	41496	63840	0.924	168	168	89749	26050	0	0.529	1383	0.109	0.353	0.406	324616	681639	220449	282039	108553
Track_171	19	1	2	0	0	0	21280	42560	63840	3321	171	171	53836	29497	0	0.244	0.629	0.015	0.254	0.186	490074	646804	200368	531928	135884
Track_175	16	1	1	0	0	0	17024	42560	59584	3240	175	175	58931	27078	0	0.294	0.713	0.054	0.262	0.197	342072	555483	225444	336352	88319
Track_176	18	0	0	0	0	0	18088	45752	63840	2023	176	176	64479	26806	0	0.261	0.886	0.091	0.201	0.194	371096	563082	210052	348550	112676
Track_178	12	0	0	0	0	0	11704	43624	55328	1124	178	178	91368	27853	0	0.428	0.95	0.041	0.375	0.304	327073	477169	214705	331654	79003
Track_179	19	1	1	0	0	0	20216	43624	63840	3446	179	179	97177	31336	0	0.297	0.874	0.019	0.296	0.228	406267	688069	218298	392312	126652
Track_194	16	0	0	0	0	0	15960	46816	62776	2889	194	194	48561	31785	0	0.331	1141	0.086	0.239	0.292	350216	493172	203653	354684	90150
Track_198	15	0	0	0	0	0	14896	48944	63840	3764	198	198	91915	28833	0	0.333	1306	0.067	0.196	0.416	424288	802095	244716	406291	161554
Track_199	10	1	2	0	0	0	11704	48944	60648	0.151	199	199	89122	27220	0	0.219	0.691	0.014	0.109	0.249	268523	352534	201710	266630	52819
Track_201	14	0	0	0	0	0	13832	50008	63840	0.69	201	201	62320	25902	0	0.332	1237	0.068	0.238	0.305	371349	504365	243241	394339	82849
Track_209	10	1	2	0	0	0	11704	52136	63840	2970	209	209	71743	21896	0	0.372	1380	0.089	0.243	0.4	331862	582541	249951	304171	92941
Track_211	11	1	1	0	0	0	11704	52136	63840	2510	211	211	89358	29647	0	0.27	0.882	0.083	0.179	0.233	344584	604022	205445	322554	121068
Track_213	9	1	2	0	0	0	10640	53200	63840	1591	213	213	91311	26870	0	0.198	0.338	0.109	0.221	0.074	287942	411869	204062	279021	68945
Track_1	60	1	1	0	0	0	63840	0	63840	0.091	1	1	11242	71900	0	0.055	0.174	0.005	0.04	0.041	322981	538997	205676	307901	72764
Track_2	12	1	2	0	0	0	13832	0	13832	0.531	2	2	14490	71802	0	0.267	0.464	0.042	0.307	0.151	608566	1041949	211863	701617	294251
Track_4	41	1	2	0	0	0	44688	0	44688	1808	4	4	14163	72009	0	0.374	1357	0.025	0.242	0.335	433853	1059237	200560	347446	222286
Track_5	21	0	0	0	0	0	21280	0	21280	3932	5	5	24437	69525	0	0.306	1096	0.031	0.243	0.255	472283	1100583	211138	403032	224143
Track_6	31	2	2	0	0	0	35112	0	35112	3990	6	6	16185	70795	0	0.311	1213	0.051	0.213	0.328	319760	584462	200457	303354	92962
Track_7	22	0	0	0	0	0	22344	0	22344	0.525	7	7	12810	72651	0	0.275	0.999	0.061	0.184	0.227	782967	1574399	224602	851136	430200
Track_8	18	2	1	0	0	0	20216	0	20216	1081	8	8	11800	72749	0	0.271	1265	0.04	0.169	0.313	553823	1169943	223256	483991	283772
Track_10	36	2	1	0	0	0	39368	0	39368	6603	10	10	29174	71444	0	0.292	0.79	0.022	0.273	0.19	390299	754940	202195	324523	172389
Track_16	44	1	1	0	0	0	46816	0	46816	1350	16	16	20048	69152	0	0.261	1345	0.01	0.138	0.303	348735	681152	212522	288514	126584
Track_20	24	0	0	0	0	0	24472	0	24472	3520	20	20	32940	68693	0	0.199	0.551	0.007	0.205	0.124	489058	761490	260385	473221	140259
Track_22	16	3	2	0	0	0	20216	0	20216	1897	22	22	17168	71534	0	0.476	1313	0.039	0.237	0.463	283741	433316	207590	285971	62858
Track_24	22	0	0	0	0	0	22344	0	22344	3629	24	24	17709	69983	0	0.27	1122	0.025	0.21	0.233	313458	576604	206279	290145	99565
Track_29	18	0	0	0	0	0	18088	0	18088	1874	29	29	15111	68091	0	0.172	0.601	0.024	0.123	0.152	597273	847225	294416	580745	150686
Track_31	23	1	1	0	0	0	24472	0	24472	2531	31	31	23056	68135	0	0.289	1382	0.012	0.166	0.352	380785	632160	205097	375277	120551
Track_32	19	1	1	0	0	0	20216	0	20216	0.897	32	32	37273	64674	0	0.348	1043	0.018	0.228	0.319	374540	616345	253531	328456	104455
Track_33	24	0	0	0	0	0	24472	0	24472	4567	33	33	19086	73124	0	0.197	0.55	0.022	0.191	0.146	448252	683719	208788	462657	122016
Track_35	27	1	2	0	0	0	29792	0	29792	6257	35	35	18223	75889	0	0.248	0.475	0.095	0.252	0.106	498967	868254	217992	500534	201443
Track_37	10	1	2	0	0	0	11704	0	11704	2110	37	37	14517	77317	0	0.298	1162	0.093	0.239	0.332	297462	402646	207400	318348	55921
Track_41	24	1	1	0	0	0	25536	2128	27664	1994	41	41	11129	69223	0	0.209	1152	0.014	0.107	0.279	371943	597773	211634	355631	128455
Track_43	22	1	1	0	0	0	23408	2128	25536	0.553	43	43	23969	75297	0	0.159	0.613	0.022	0.123	0.153	337541	610161	203506	285433	117179
Track_45	15	0	0	0	0	0	14896	2128	17024	0.382	45	45	43872	58225	0	0.257	1005	0.051	0.147	0.27	301627	544241	202852	287247	89229
Track_47	16	1	2	0	0	0	18088	2128	20216	2934	47	47	45560	55515	0	0.305	1058	0.008	0.188	0.276	400473	823583	206774	347287	198660
Track_51	11	0	0	0	0	0	10640	1064	11704	1339	51	51	40074	62650	0	0.132	0.218	0.052	0.137	0.059	438392	625720	229792	464630	123773
Track_52	14	0	0	0	0	0	13832	2128	15960	0.829	52	52	20995	69095	0	0.281	0.718	0.041	0.251	0.229	339263	642764	220595	310704	119389
Track_56	14	0	0	0	0	0	13832	4256	18088	1876	56	56	24233	69109	0	0.345	0.93	0.054	0.185	0.312	394779	643684	211519	416990	128426
Track_59	13	2	2	0	0	0	15960	4256	20216	0.176	59	59	41096	59146	0	0.168	0.407	0.04	0.125	0.133	233040	310539	202207	220507	30682
Track_64	24	2	2	0	0	0	27664	5320	32984	3357	64	64	18323	77264	0	0.186	1022	0.009	0.135	0.218	334369	486338	205328	336328	84216
Track_68	18	1	2	0	0	0	20216	7448	27664	2030	68	68	38590	63281	0	0.363	1294	0.053	0.299	0.296	485122	992728	212020	428539	245306
Track_73	43	6	2	0	0	0	52136	9576	61712	2739	73	73	40371	60502	0	0.358	1092	0.04	0.284	0.287	279287	471536	202796	252703	67136
Track_77	24	1	1	0	0	0	25536	9576	35112	5852	77	77	31910	69186	0	0.289	0.865	0.033	0.278	0.18	443859	815562	232800	387018	164601
Track_81	21	2	1	0	0	0	23408	11704	35112	1643	81	81	24646	68728	0	0.199	1245	0.005	0.116	0.285	308618	477182	200012	281116	84303
Track_82	47	1	2	0	0	0	51072	12768	63840	1118	82	82	12640	72748	0	0.29	1190	0.017	0.203	0.282	605052	1437805	217050	555710	278934
Track_86	20	1	1	0	0	0	21280	12768	34048	3256	86	86	24092	71561	0	0.213	0.598	0.09	0.19	0.121	483906	831046	201781	526285	200739
Track_90	18	1	1	0	0	0	19152	14896	34048	1687	90	90	31070	68229	0	0.335	1010	0.047	0.242	0.279	390767	635074	209950	406704	129675
Track_94	13	3	1	0	0	0	15960	15960	31920	1122	94	94	16516	72200	0	0.181	0.569	0.055	0.137	0.154	357007	739933	217759	296321	139529
Track_99	12	1	2	0	0	0	13832	19152	32984	3042	99	99	35777	66909	0	0.347	1265	0.127	0.262	0.314	483853	800699	206480	518581	175368
Track_100	12	1	2	0	0	0	13832	19152	32984	0.892	100	100	18456	73376	0	0.529	1367	0.051	0.282	0.476	232262	280359	200365	224662	28234
Track_101	21	0	0	0	0	0	21280	20216	41496	1695	101	101	18659	71261	0	0.177	0.55	0.042	0.146	0.128	519639	824680	248194	510579	142719
Track_106	40	0	0	0	0	0	41496	22344	63840	0.41	106	106	14387	71762	0	0.292	0.709	0.016	0.234	0.204	413890	1051649	200589	348031	193865
Track_109	9	1	2	0	0	0	10640	23408	34048	2225	109	109	19514	74770	0	0.3	0.585	0.073	0.356	0.165	297430	410260	212688	286339	58211
Track_110	21	0	0	0	0	0	21280	23408	44688	2605	110	110	38640	63144	0	0.206	0.454	0.059	0.195	0.113	584084	1337704	228410	419189	357123
Track_112	13	0	0	0	0	0	12768	23408	36176	3165	112	112	42317	58541	0	0.365	1260	0.038	0.32	0.33	388429	646915	202630	404346	119239
Track_115	14	0	0	0	0	0	13832	24472	38304	2467	115	115	25879	73929	0	0.188	0.388	0.036	0.16	0.111	471282	802651	204225	498418	165046
Track_117	24	0	0	0	0	0	24472	24472	48944	0.803	117	117	23577	74504	0	0.234	0.768	0.019	0.14	0.222	331674	577292	207585	339530	107520
Track_120	12	0	0	0	0	0	11704	26600	38304	1497	120	120	17889	75501	0	0.252	0.761	0.091	0.236	0.183	439755	875002	210120	337557	250676
Track_123	13	0	0	0	0	0	12768	26600	39368	1907	123	123	30679	70762	0	0.167	0.337	0.038	0.157	0.094	341657	464888	209454	350963	81701
Track_130	26	3	1	0	0	0	29792	28728	58520	7959	130	130	27032	69200	0	0.291	1150	0.038	0.244	0.211	443096	756425	211023	449652	155458
Track_131	22	2	1	0	0	0	24472	29792	54264	3889	131	131	24078	72706	0	0.213	1195	0.036	0.168	0.241	419275	585655	211772	437840	119439
Track_132	32	1	1	0	0	0	34048	29792	63840	0.229	132	132	13250	72491	0	0.314	1189	0.025	0.219	0.261	441325	834800	220336	426617	161268
Track_133	11	0	0	0	0	0	10640	29792	40432	1032	133	133	13551	70256	0	0.269	0.967	0.075	0.203	0.268	437235	585745	203899	476480	111634
Track_135	31	1	1	0	0	0	32984	30856	63840	4071	135	135	28098	70844	0	0.273	1357	0.023	0.188	0.262	470303	813269	238433	468056	139996
Track_136	14	0	0	0	0	0	13832	31920	45752	2294	136	136	16186	71456	0	0.314	1245	0.049	0.214	0.319	278812	372974	202759	294055	58569
Track_138	21	0	0	0	0	0	21280	30856	52136	5695	138	138	20717	68524	0	0.276	0.668	0.028	0.22	0.177	538894	810556	246938	537871	130654
Track_139	14	1	1	0	0	0	14896	31920	46816	0.589	139	139	43797	57973	0	0.29	1075	0.049	0.138	0.293	296500	516302	200339	238727	100650
Track_142	18	1	1	0	0	0	19152	34048	53200	2403	142	142	22872	75436	0	0.184	0.804	0.024	0.145	0.183	407139	565029	216380	432541	105923
Track_144	25	1	2	0	0	0	27664	34048	61712	0.345	144	144	24638	68305	0	0.158	0.769	0.007	0.105	0.174	395491	685104	207716	378314	128125
Track_145	28	0	0	0	0	0	28728	35112	63840	4746	145	145	30005	68815	0	0.21	0.599	0.009	0.148	0.174	505803	806754	222327	490017	162136
Track_146	11	3	2	0	0	0	14896	36176	51072	1707	146	146	39766	60904	0	0.218	0.809	0.029	0.147	0.234	249714	322166	202775	243214	32868
Track_147	11	0	0	0	0	0	10640	35112	45752	0.531	147	147	37502	65476	0	0.215	0.651	0.087	0.17	0.175	420525	728143	223583	415066	153736
Track_149	24	0	0	0	0	0	24472	35112	59584	1217	149	149	39288	64425	0	0.223	1039	0.039	0.186	0.203	347388	648419	204879	348242	110456
Track_158	11	0	0	0	0	0	10640	38304	48944	0.394	158	158	24236	75225	0	0.102	0.208	0.032	0.115	0.05	367223	730182	229509	354895	133413
Track_163	13	0	0	0	0	0	12768	39368	52136	0.461	163	163	45560	55412	0	0.387	0.996	0.064	0.336	0.309	348659	669833	200910	232096	171365
Track_166	16	1	1	0	0	0	17024	40432	57456	1374	166	166	37875	65601	0	0.184	0.355	0.017	0.197	0.109	414277	608832	225317	407042	119416
Track_167	14	0	0	0	0	0	13832	40432	54264	1247	167	167	18953	74735	0	0.138	0.422	0.05	0.112	0.107	464002	693106	207593	449622	116880
Track_168	16	1	1	0	0	0	17024	40432	57456	1124	168	168	39911	61397	0	0.281	1200	0.035	0.179	0.309	300210	512853	223917	292630	69203
Track_171	14	0	0	0	0	0	13832	42560	56392	2266	171	171	34325	66585	0	0.248	0.405	0.095	0.254	0.095	567976	813636	222411	600741	149711
Track_175	13	2	1	0	0	0	14896	45752	60648	1778	175	175	21415	68446	0	0.263	1157	0.056	0.162	0.309	295728	527319	202759	236047	103792
Track_180	15	2	1	0	0	0	17024	45752	62776	1615	180	180	30689	71175	0	0.158	0.417	0.016	0.143	0.118	370586	587688	205884	354141	103917
Track_181	13	1	1	0	0	0	13832	47880	61712	4086	181	181	20366	69894	0	0.296	0.479	0.091	0.307	0.116	341675	542716	212704	311309	82111
Track_189	12	1	2	0	0	0	13832	50008	63840	0.539	189	189	36996	64579	0	0.152	0.546	0.029	0.099	0.152	346493	505585	272790	311880	75657
Track_190	14	0	0	0	0	0	13832	50008	63840	0.861	190	190	14667	71162	0	0.249	0.602	0.027	0.151	0.197	363908	627705	242278	377287	114240
Track_204	11	1	1	0	0	0	11704	52136	63840	1496	204	204	18261	75628	0	0.227	0.765	0.074	0.124	0.23	368327	537084	256472	372152	92945
Track_207	12	0	0	0	0	0	11704	52136	63840	2849	207	207	24903	70553	0	0.253	0.387	0.121	0.232	0.083	438481	621000	200032	462790	110467
Track_208	9	1	2	0	0	0	10640	53200	63840	2033	208	208	17230	72980	0	0.268	0.582	0.04	0.3	0.181	351951	722507	234318	273063	169199
Track_214	11	0	0	0	0	0	10640	53200	63840	3695	214	214	22946	67884	0	0.373	0.59	0.085	0.458	0.191	348325	449831	250142	344078	59902
Track_215	11	0	0	0	0	0	10640	53200	63840	2158	215	215	13712	68728	0	0.207	0.352	0.037	0.189	0.106	449732	719565	231364	477937	126500
Track_217	11	0	0	0	0	0	10640	53200	63840	3941	217	217	42743	60019	0	0.42	1085	0.138	0.416	0.276	361572	610857	204326	371390	142204

## Sheet: Auxin L1 animal 2
																Mean speed										Average
Track_2	12	0	0	0	0	0	11704	0	11704	2092	2	2	80989	82754	0	0.213	0.397	0.099	0.18	0.092	457206	609550	210599	486748	119415	0.237024
Track_5	11	0	0	0	0	0	10640	0	10640	0.58	5	5	74332	84702	0	0.121	0.252	0.033	0.112	0.072	329386	615300	209965	249623	128601
Track_8	10	1	2	0	0	0	11704	0	11704	1876	8	8	47418	81373	0	0.304	0.514	0.035	0.33	0.171	578529	1092364	273638	574387	255680
Track_10	42	2	2	0	0	0	47880	0	47880	10116	10	10	73462	82601	0	0.25	0.42	0.02	0.254	0.092	482067	775709	268195	467597	122746
Track_11	13	0	0	0	0	0	12768	0	12768	2922	11	11	54929	84416	0	0.26	0.407	0.064	0.303	0.118	470349	668331	206403	526416	167636
Track_13	12	0	0	0	0	0	11704	0	11704	2732	13	13	83342	77718	0	0.253	0.415	0.156	0.218	0.093	504881	710649	329270	509688	108761
Track_17	14	1	2	0	0	0	15960	0	15960	3434	17	17	62592	87050	0	0.281	0.725	0.055	0.21	0.192	457362	736425	261841	451714	156464
Track_19	9	1	2	0	0	0	10640	0	10640	1833	19	19	64093	88296	0	0.25	0.735	0.032	0.118	0.301	259301	400581	202257	239603	59551
Track_26	16	0	0	0	0	0	15960	2128	18088	2105	26	26	86083	76397	0	0.17	0.362	0.033	0.198	0.09	385978	640945	209331	367314	123706
Track_28	20	0	0	0	0	0	20216	3192	23408	2103	28	28	86348	74035	0	0.313	1179	0.011	0.28	0.269	406937	703296	208145	448848	147965
Track_32	13	0	0	0	0	0	12768	7448	20216	0.485	32	32	87742	77796	0	0.129	0.302	0.025	0.133	0.079	348559	558412	215283	347793	93963
Track_34	9	1	2	0	0	0	10640	7448	18088	0.778	34	34	54114	87930	0	0.222	0.974	0.002	0.135	0.324	382993	508667	299802	368015	75414
Track_37	11	0	0	0	0	0	10640	8512	19152	2470	37	37	75302	84020	0	0.275	0.486	0.069	0.298	0.129	419332	613463	230118	414976	117574
Track_38	23	0	0	0	0	0	23408	8512	31920	4664	38	38	74128	84267	0	0.24	0.634	0.059	0.214	0.155	428072	791059	264167	423388	122324
Track_41	14	2	2	0	0	0	17024	9576	26600	1803	41	41	61912	86834	0	0.152	0.3	0.025	0.152	0.079	309133	478127	202287	305702	65134
Track_53	23	3	2	0	0	0	27664	13832	41496	6007	53	53	87515	71707	0	0.384	1382	0.036	0.281	0.357	332211	641491	200118	293255	122329
Track_55	18	0	0	0	0	0	18088	15960	34048	0.601	55	55	47661	84554	0	0.208	1122	0.034	0.145	0.254	505091	816285	203028	542524	162208
Track_56	46	0	0	0	0	0	47880	15960	63840	12220	56	56	59336	84722	0	0.283	0.565	0.076	0.299	0.108	503646	868239	263946	495129	114828
Track_63	20	1	1	0	0	0	21280	18088	39368	4166	63	63	81061	78383	0	0.216	0.405	0.06	0.186	0.102	439194	777563	210188	414897	170342
Track_70	15	1	1	0	0	0	15960	22344	38304	0.478	70	70	64131	89024	0	0.199	0.365	0.042	0.208	0.1	378806	686793	202591	356138	132448
Track_79	14	1	2	0	0	0	15960	25536	41496	1533	79	79	88504	76705	0	0.166	0.374	0.023	0.16	0.11	299607	457583	200616	283184	77058
Track_84	22	2	2	0	0	0	26600	27664	54264	2803	84	84	49691	84368	0	0.322	1006	0.044	0.269	0.207	410680	616940	221126	392072	105436
Track_86	16	0	0	0	0	0	15960	28728	44688	2949	86	86	57875	87048	0	0.264	0.53	0.073	0.268	0.126	479271	884724	222944	481155	175817
Track_90	32	0	0	0	0	0	32984	30856	63840	6254	90	90	85012	75404	0	0.436	1293	0.034	0.343	0.336	327832	576283	206577	309725	108881
Track_92	19	3	2	0	0	0	23408	31920	55328	1730	92	92	90322	73922	0	0.188	0.4	0.019	0.178	0.122	314083	540724	203227	294997	87368
Track_101	27	2	1	0	0	0	29792	34048	63840	3393	101	101	77653	83837	0	0.235	1293	0.021	0.156	0.288	320722	599058	203842	298397	98590
Track_103	13	0	0	0	0	0	12768	36176	48944	0.901	103	103	63194	89138	0	0.243	0.824	0.054	0.207	0.202	409768	657948	232675	425055	133540
Track_109	18	0	0	0	0	0	18088	37240	55328	3639	109	109	54169	85411	0	0.269	0.971	0.053	0.232	0.217	421130	689834	234032	436175	120255
Track_114	10	1	2	0	0	0	11704	39368	51072	1645	114	114	87046	72528	0	0.234	0.613	0.048	0.174	0.167	320906	499586	200991	335585	97326
Track_117	11	1	1	0	0	0	11704	39368	51072	0.798	117	117	74719	84776	0	0.207	0.338	0.049	0.247	0.096	332726	478598	210030	376834	102700
Track_122	19	0	0	0	0	0	19152	40432	59584	3416	122	122	86917	78131	0	0.198	0.674	0.035	0.135	0.181	418416	806017	232605	363505	172224
Track_128	12	0	0	0	0	0	11704	45752	57456	3123	128	128	84834	78973	0	0.274	0.495	0.165	0.263	0.089	423624	581913	221572	453596	120005
Track_132	15	0	0	0	0	0	14896	47880	62776	3541	132	132	51103	84098	0	0.258	0.457	0.131	0.285	0.1	381722	512066	204875	425109	101501
Track_133	14	1	2	0	0	0	15960	47880	63840	0.8	133	133	52329	84561	0	0.102	0.278	0.03	0.077	0.078	360998	535516	228278	377682	97147
Track_138	15	0	0	0	0	0	14896	48944	63840	1024	138	138	79302	79665	0	0.167	0.42	0.042	0.131	0.113	411302	563886	236310	413413	82227
Track_141	13	1	2	0	0	0	14896	48944	63840	0.217	141	141	62256	88676	0	0.322	1228	0.016	0.248	0.347	271245	459352	200956	258032	63444
Track_142	10	1	1	0	0	0	10640	48944	59584	1849	142	142	80060	81743	0	0.193	0.373	0.066	0.169	0.108	364409	493153	250167	367743	78333
Track_147	12	1	2	0	0	0	13832	50008	63840	2943	147	147	48643	82640	0	0.231	0.36	0.048	0.246	0.104	539094	887208	248227	502957	210314
Track_149	11	1	1	0	0	0	11704	52136	63840	3297	149	149	53066	85578	0	0.294	0.501	0.162	0.293	0.103	346785	470589	227001	320734	68654
Track_151	12	0	0	0	0	0	11704	52136	63840	0.53	151	151	46194	82886	0	0.168	0.34	0.069	0.12	0.1	328613	431781	249942	326565	51345
Track_152	11	0	0	0	0	0	10640	53200	63840	1047	152	152	70909	85803	0	0.224	0.996	0.029	0.128	0.303	428300	730859	212460	408046	169816

## Sheet: Auxin L1 animal 3
																Mean speed										Average
Track_0	14	0	0	0	0	0	13832	0	13832	0.913	0	0	45242	35893	0	0.235	0.867	0.018	0.192	0.216	506191	740122	209314	564592	143464	0.267928
Track_1	48	4	2	0	0	0	55328	0	55328	3188	1	1	70894	48838	0	0.262	1351	0.016	0.199	0.266	414626	793298	201101	390051	165501
Track_2	14	2	2	0	0	0	17024	0	17024	1026	2	2	44658	35116	0	0.367	1376	0.068	0.285	0.346	360571	816344	206568	276365	175696
Track_3	17	0	0	0	0	0	17024	1064	18088	1175	3	3	46647	36439	0	0.255	0.808	0.019	0.188	0.252	431893	574122	203570	429875	109175
Track_11	11	0	0	0	0	0	10640	0	10640	3092	11	11	76866	54070	0	0.313	1184	0.123	0.2	0.319	330433	537526	207990	304959	101046
Track_12	27	1	1	0	0	0	28728	2128	30856	1657	12	12	87231	67344	0	0.351	1249	0.066	0.195	0.363	340645	614666	202574	279519	124800
Track_17	54	2	1	0	0	0	58520	0	58520	2474	17	17	59148	42219	0	0.225	0.847	0.019	0.175	0.167	360716	894941	201578	332151	136761
Track_18	39	1	1	0	0	0	41496	0	41496	2474	18	18	44303	33207	0	0.289	0.996	0.04	0.258	0.204	419533	783569	200537	384255	154335
Track_19	23	3	2	0	0	0	28728	0	28728	3332	19	19	47071	33739	0	0.158	0.54	0.021	0.115	0.139	393511	596122	206708	421093	114106
Track_24	14	2	2	0	0	0	17024	0	17024	2250	24	24	76621	58170	0	0.232	0.338	0.115	0.232	0.067	428948	681099	253813	456508	124825
Track_25	14	1	2	0	0	0	15960	0	15960	1443	25	25	52791	37715	0	0.285	1254	0.034	0.191	0.311	433078	651073	220179	372897	147839
Track_27	17	0	0	0	0	0	17024	0	17024	3334	27	27	80334	56195	0	0.282	0.52	0.076	0.278	0.127	458805	839862	244690	410100	168946
Track_29	16	1	1	0	0	0	17024	0	17024	0.719	29	29	70462	46249	0	0.172	0.541	0.018	0.16	0.147	368005	712685	240069	351233	109843
Track_30	30	1	1	0	0	0	31920	0	31920	4140	30	30	72215	51552	0	0.287	1295	0.054	0.203	0.276	453552	865948	201100	433605	157043
Track_31	13	0	0	0	0	0	12768	0	12768	1947	31	31	48924	35901	0	0.197	0.523	0.028	0.188	0.144	603263	901323	302265	579210	165126
Track_33	29	1	2	0	0	0	31920	0	31920	5233	33	33	61633	42341	0	0.24	0.597	0.065	0.227	0.133	557061	919243	201077	510678	195653
Track_35	26	0	0	0	0	0	26600	0	26600	3242	35	35	55870	39888	0	0.272	1081	0.035	0.19	0.258	430266	743905	221429	426497	146792
Track_36	12	2	2	0	0	0	14896	0	14896	0.855	36	36	82530	67264	0	0.337	1040	0.047	0.215	0.299	268049	380753	202703	272309	55385
Track_37	13	1	1	0	0	0	13832	1064	14896	3152	37	37	92309	75902	0	0.247	0.472	0.103	0.25	0.108	398200	644698	234673	395304	109939
Track_38	13	0	0	0	0	0	12768	0	12768	0.449	38	38	63917	41605	0	0.276	1302	0.07	0.187	0.332	396866	603341	219004	387868	129824
Track_39	11	1	2	0	0	0	12768	0	12768	1049	39	39	50420	38251	0	0.469	1122	0.045	0.432	0.436	274460	430444	213136	265823	62123
Track_41	56	5	1	0	0	0	63840	0	63840	1959	41	41	44528	33499	0	0.3	1252	0.029	0.201	0.288	345144	678924	201706	334345	100105
Track_43	28	4	2	0	0	0	34048	0	34048	2043	43	43	56631	41938	0	0.469	1319	0.048	0.294	0.381	302552	508782	205955	282380	83989
Track_52	13	0	0	0	0	0	12768	3192	15960	1490	52	52	67613	43965	0	0.152	0.286	0.06	0.12	0.08	423445	550025	314972	417392	83111
Track_55	11	0	0	0	0	0	10640	3192	13832	2472	55	55	67726	49068	0	0.249	0.316	0.154	0.261	0.05	592399	896214	285270	625443	213740
Track_56	26	3	1	0	0	0	29792	3192	32984	7394	56	56	80241	57518	0	0.286	0.832	0.083	0.24	0.149	369708	604854	200409	371318	101275
Track_61	29	1	2	0	0	0	31920	4256	36176	2173	61	61	64293	42843	0	0.298	0.889	0.045	0.275	0.205	332493	633724	200695	269397	133847
Track_62	12	1	2	0	0	0	13832	4256	18088	0.293	62	62	59733	42619	0	0.238	0.621	0.03	0.199	0.18	287303	363881	217848	302623	52843
Track_64	16	2	2	0	0	0	19152	5320	24472	0.399	64	64	83118	65783	0	0.371	0.718	0.043	0.326	0.238	283773	461746	204233	243848	78692
Track_65	41	0	0	0	0	0	42560	6384	48944	7856	65	65	82438	57756	0	0.305	1270	0.023	0.244	0.294	392977	760630	203555	396708	150020
Track_67	34	0	0	0	0	0	35112	4256	39368	3870	67	67	68289	45144	0	0.199	0.68	0.016	0.171	0.155	484320	744277	206563	509108	161152
Track_68	31	2	1	0	0	0	34048	5320	39368	3715	68	68	79277	53939	0	0.262	0.693	0.072	0.248	0.115	383576	694912	201940	369604	133856
Track_70	13	2	2	0	0	0	17024	4256	21280	2715	70	70	76890	59262	0	0.173	0.423	0.069	0.17	0.094	334885	688226	203562	313654	115681
Track_74	10	2	1	0	0	0	11704	9576	21280	2448	74	74	74276	48682	0	0.336	1166	0.089	0.179	0.37	268486	366182	200785	259795	45238
Track_75	12	0	0	0	0	0	11704	9576	21280	1590	75	75	85843	67283	0	0.18	0.337	0.069	0.161	0.084	351935	514026	205402	360846	87613
Track_76	11	0	0	0	0	0	10640	8512	19152	1507	76	76	47920	33485	0	0.176	0.376	0.038	0.177	0.088	515413	874847	218748	520147	168611
Track_78	39	3	1	0	0	0	43624	10640	54264	2413	78	78	57401	39078	0	0.262	0.973	0.028	0.213	0.181	384430	741600	203054	358104	151796
Track_79	16	1	1	0	0	0	17024	10640	27664	1108	79	79	91923	72204	0	0.311	1221	0.042	0.125	0.368	343066	520177	200073	335253	87849
Track_87	18	0	0	0	0	0	18088	12768	30856	2228	87	87	57842	41322	0	0.322	0.869	0.09	0.258	0.234	422080	765167	212382	388440	150670
Track_93	28	5	2	0	0	0	35112	13832	48944	4537	93	93	77184	52628	0	0.273	0.839	0.034	0.24	0.188	304860	552807	202720	306979	73456
Track_95	8	2	2	0	0	0	11704	14896	26600	1176	95	95	57317	41625	0	0.172	0.322	0.061	0.147	0.095	250228	295639	200631	261239	29894
Track_105	12	1	1	0	0	0	12768	15960	28728	1188	105	105	83152	57419	0	0.137	0.333	0.017	0.073	0.12	360044	533954	200298	390459	106698
Track_107	20	0	0	0	0	0	20216	17024	37240	3047	107	107	54959	37590	0	0.253	0.796	0.042	0.187	0.203	328109	536702	214808	334986	81154
Track_109	10	1	2	0	0	0	11704	17024	28728	1644	109	109	74168	52161	0	0.233	0.388	0.147	0.219	0.075	269162	344895	204324	269311	46960
Track_110	19	0	0	0	0	0	19152	18088	37240	3797	110	110	93142	79823	0	0.221	0.459	0.003	0.262	0.112	386547	677556	235275	389885	95053
Track_112	10	2	1	0	0	0	11704	18088	29792	0.604	112	112	83794	59038	0	0.15	0.367	0.044	0.126	0.105	290331	460248	216701	267263	76738
Track_113	16	0	0	0	0	0	15960	18088	34048	2807	113	113	63912	44578	0	0.205	0.303	0.08	0.218	0.068	409594	522845	240491	449292	95285
Track_114	16	0	0	0	0	0	15960	18088	34048	3657	114	114	46741	35345	0	0.533	1363	0.031	0.379	0.44	327494	561482	212026	312323	89977
Track_116	17	0	0	0	0	0	17024	18088	35112	1434	116	116	40005	31528	0	0.199	0.549	0.06	0.181	0.117	461246	608809	245952	472495	92954
Track_125	11	2	1	0	0	0	12768	21280	34048	0.709	125	125	44408	34936	0	0.267	0.557	0.067	0.329	0.154	283037	465924	228290	273359	60111
Track_129	24	1	1	0	0	0	25536	21280	46816	4853	129	129	60939	42905	0	0.226	0.701	0.041	0.215	0.136	431691	829766	228881	416054	152009
Track_130	11	0	0	0	0	0	10640	20216	30856	1129	130	130	50930	37424	0	0.166	0.266	0.046	0.185	0.069	406014	619083	260159	303271	146769
Track_131	35	2	2	0	0	0	39368	22344	61712	2926	131	131	56382	41393	0	0.345	0.893	0.029	0.286	0.242	365695	962346	209305	331711	155786
Track_133	29	1	2	0	0	0	31920	23408	55328	5938	133	133	90242	70311	0	0.288	1338	0.067	0.283	0.235	333708	510586	204942	337339	77063
Track_134	14	1	2	0	0	0	15960	23408	39368	1313	134	134	45754	35386	0	0.485	1357	0.012	0.327	0.446	283233	433425	200702	252274	74425
Track_140	18	2	1	0	0	0	20216	25536	45752	2150	140	140	55203	37549	0	0.31	1394	0.022	0.219	0.31	402576	702015	200504	403355	134736
Track_143	19	1	2	0	0	0	21280	25536	46816	4342	143	143	85819	69517	0	0.392	1245	0.09	0.286	0.326	294255	515918	200607	303213	79023
Track_147	12	0	0	0	0	0	11704	27664	39368	3267	147	147	48367	36611	0	0.386	0.911	0.135	0.335	0.28	371964	497564	206433	388247	85249
Track_148	20	0	0	0	0	0	20216	27664	47880	1879	148	148	46729	36480	0	0.34	0.888	0.038	0.24	0.265	379013	663571	206249	342164	148871
Track_156	20	1	2	0	0	0	22344	29792	52136	1624	156	156	45137	35868	0	0.239	1089	0.035	0.137	0.269	383386	631550	225575	341891	135367
Track_160	14	0	0	0	0	0	13832	30856	44688	1814	160	160	52155	38222	0	0.354	1127	0.069	0.278	0.305	429498	848222	219010	377203	204380
Track_161	13	2	1	0	0	0	14896	30856	45752	0.906	161	161	73912	49031	0	0.506	1281	0.033	0.484	0.426	335368	732054	203008	264117	154509
Track_162	17	2	2	0	0	0	21280	30856	52136	1379	162	162	58188	38778	0	0.243	0.705	0.093	0.211	0.151	473913	783137	222376	416645	193659
Track_163	29	0	0	0	0	0	29792	31920	61712	5858	163	163	79606	55690	0	0.24	0.486	0.021	0.284	0.131	466534	807879	229032	450709	147778
Track_164	10	2	2	0	0	0	12768	31920	44688	1139	164	164	62249	40339	0	0.314	0.882	0.078	0.264	0.243	285037	602920	215559	276122	108974
Track_165	25	1	1	0	0	0	26600	31920	58520	1723	165	165	70396	46024	0	0.3	0.904	0.012	0.2	0.302	290733	448807	202596	286875	67866
Track_167	17	0	0	0	0	0	17024	32984	50008	0.905	167	167	55863	41317	0	0.2	0.388	0.047	0.227	0.101	440100	1087641	291044	385649	197511
Track_170	28	1	1	0	0	0	29792	34048	63840	1781	170	170	46813	34119	0	0.237	1219	0.071	0.155	0.246	413112	854889	221057	367831	145577
Track_172	26	3	1	0	0	0	29792	34048	63840	1374	172	172	45138	35187	0	0.346	1189	0.05	0.161	0.358	282497	522909	204099	270950	75000
Track_174	14	0	0	0	0	0	13832	36176	50008	3679	174	174	92412	75014	0	0.308	0.516	0.177	0.278	0.095	301041	408735	201544	299374	65611
Track_175	13	1	2	0	0	0	14896	36176	51072	0.485	175	175	83710	66307	0	0.297	0.885	0.033	0.278	0.296	290279	441971	211370	273193	77235
Track_181	16	1	2	0	0	0	18088	38304	56392	3640	181	181	74701	52007	0	0.316	0.738	0.055	0.211	0.218	371309	531359	222169	402297	96817
Track_185	14	0	0	0	0	0	13832	37240	51072	2396	185	185	48749	37340	0	0.235	0.552	0.049	0.175	0.16	558807	1060837	227480	516907	214496
Track_187	12	1	1	0	0	0	12768	38304	51072	0.577	187	187	83444	61320	0	0.196	0.615	0.013	0.159	0.176	444877	667824	296095	421807	127327
Track_188	25	0	0	0	0	0	25536	38304	63840	1987	188	188	45638	35013	0	0.392	1264	0.03	0.283	0.335	427628	776708	248939	366680	150043
Track_189	24	0	0	0	0	0	24472	39368	63840	5812	189	189	48317	36119	0	0.262	1275	0.06	0.235	0.238	444965	722580	207890	462987	142700
Track_190	13	0	0	0	0	0	12768	39368	52136	1475	190	190	63286	41210	0	0.25	1175	0.039	0.145	0.306	446582	680191	205460	455629	163215
Track_191	20	0	0	0	0	0	20216	39368	59584	1938	191	191	54864	39922	0	0.294	1181	0.058	0.206	0.304	471535	892916	222585	459841	194787
Track_194	21	1	1	0	0	0	22344	40432	62776	4532	194	194	74020	49769	0	0.256	0.478	0.052	0.262	0.11	418462	571034	206681	411469	101492
Track_196	16	1	1	0	0	0	17024	40432	57456	4639	196	196	78448	57996	0	0.28	0.763	0.041	0.231	0.192	367567	591870	212469	331577	130477
Track_200	9	1	2	0	0	0	10640	41496	52136	1353	200	200	76897	58974	0	0.263	1065	0.057	0.182	0.329	378271	695966	202502	318219	185175
Track_202	11	1	1	0	0	0	11704	42560	54264	0.491	202	202	50972	38312	0	0.109	0.235	0.027	0.088	0.081	346273	475638	273066	320700	60868
Track_205	19	1	1	0	0	0	20216	43624	63840	4292	205	205	61945	42669	0	0.226	0.363	0.04	0.252	0.093	478391	739699	212009	466257	153576
Track_208	19	0	0	0	0	0	19152	44688	63840	3955	208	208	85028	64756	0	0.282	0.956	0.073	0.244	0.203	348665	493353	208362	370915	69738
Track_211	15	1	1	0	0	0	15960	45752	61712	2782	211	211	84836	63876	0	0.201	0.318	0.093	0.215	0.064	335044	523360	206527	331992	80773
Track_220	11	0	0	0	0	0	10640	48944	59584	1874	220	220	79867	54922	0	0.252	0.599	0.153	0.2	0.134	401462	651928	215188	416264	122823
Track_225	9	3	2	0	0	0	12768	50008	62776	1836	225	225	70604	48923	0	0.166	0.26	0.071	0.193	0.062	322025	512465	216868	314974	84780
Track_231	11	1	2	0	0	0	12768	51072	63840	1239	231	231	84597	66515	0	0.305	1161	0.045	0.126	0.401	304421	492347	213398	303571	77854
Track_232	11	1	2	0	0	0	12768	51072	63840	0.684	232	232	76906	51435	0	0.287	0.823	0.065	0.145	0.272	286258	378723	211488	274280	49436
Track_233	13	0	0	0	0	0	12768	51072	63840	2361	233	233	59629	43676	0	0.287	0.782	0.041	0.232	0.217	421791	700467	205778	365871	151047
Track_235	10	1	2	0	0	0	11704	51072	62776	1610	235	235	86486	69769	0	0.138	0.245	0.025	0.153	0.073	325822	527590	209154	302464	107670
Track_236	12	0	0	0	0	0	11704	52136	63840	0.989	236	236	40309	32019	0	0.111	0.287	0.046	0.107	0.069	288322	467943	202955	257097	84998
Track_237	12	0	0	0	0	0	11704	52136	63840	0.304	237	237	47389	34024	0	0.142	0.551	0.031	0.096	0.147	422475	641793	216459	412399	114392
Track_239	12	0	0	0	0	0	11704	52136	63840	2666	239	239	53468	38084	0	0.236	0.394	0.094	0.205	0.093	508103	740473	251763	519082	143021
Track_240	10	1	2	0	0	0	11704	52136	63840	2418	240	240	60908	40888	0	0.221	0.412	0.018	0.224	0.113	343833	489195	202905	375196	94820
Track_242	11	0	0	0	0	0	10640	53200	63840	2041	242	242	65585	43348	0	0.193	0.383	0.114	0.185	0.081	499742	713520	294033	456458	141196
Track_244	11	0	0	0	0	0	10640	53200	63840	0.099	244	244	88734	65829	0	0.284	0.93	0.074	0.204	0.275	281845	447364	208176	247894	82205

## Sheet: Auxin L1 animal 4
																Mean speed										Average
Track_4	10	3	2	0	0	0	13832	0	13832	0.283	4	4	50411	65042	0	0.207	0.358	0.069	0.183	0.105	327653	475606	210177	327746	92717	0.314667
Track_6	32	1	2	0	0	0	35112	0	35112	4883	6	6	51746	70924	0	0.261	0.494	0.047	0.228	0.132	585368	843963	258154	642115	150441
Track_8	38	0	0	0	0	0	39368	0	39368	1116	8	8	51423	75402	0	0.189	0.855	0.018	0.169	0.161	422628	596348	200136	432452	73906
Track_10	16	2	1	0	0	0	18088	0	18088	0.313	10	10	51094	49894	0	0.27	0.595	0.043	0.274	0.16	304392	382295	231071	304482	39703
Track_14	20	1	2	0	0	0	22344	0	22344	5170	14	14	54588	54818	0	0.326	1368	0.062	0.21	0.323	433769	652560	204359	465525	130338
Track_15	32	0	0	0	0	0	32984	0	32984	9405	15	15	54432	51498	0	0.36	0.958	0.02	0.368	0.219	512495	868508	214729	515542	157625
Track_16	18	0	0	0	0	0	18088	0	18088	7032	16	16	53846	56019	0	0.429	0.905	0.092	0.342	0.278	490285	940724	212659	482246	181778
Track_20	14	1	2	0	0	0	15960	0	15960	1606	20	20	50982	62159	0	0.299	0.714	0.026	0.247	0.17	374877	604148	231361	394503	108127
Track_23	16	0	0	0	0	0	15960	0	15960	3416	23	23	54370	44294	0	0.31	0.763	0.044	0.31	0.184	553262	993922	263547	511377	213601
Track_27	11	0	0	0	0	0	10640	0	10640	0.673	27	27	51613	48096	0	0.311	0.558	0.058	0.393	0.181	295442	420576	204988	267276	75828
Track_29	15	1	1	0	0	0	15960	1064	17024	0.74	29	29	50527	68427	0	0.296	1130	0.027	0.209	0.289	362968	584044	203487	370637	100267
Track_31	11	0	0	0	0	0	10640	1064	11704	1474	31	31	54942	74000	0	0.531	1334	0.06	0.338	0.492	333699	574603	210111	318305	104233
Track_32	13	2	2	0	0	0	15960	2128	18088	1953	32	32	54269	46018	0	0.207	0.517	0.084	0.173	0.129	290105	402848	240452	269498	45826
Track_34	12	0	0	0	0	0	11704	2128	13832	2720	34	34	55401	42098	0	0.454	1124	0.115	0.346	0.328	491478	706321	210343	575550	189339
Track_35	10	1	1	0	0	0	10640	2128	12768	1534	35	35	52218	74892	0	0.321	1401	0.042	0.21	0.412	269835	356383	201637	278102	47319
Track_36	25	3	2	0	0	0	29792	2128	31920	3267	36	36	57281	83789	0	0.292	0.858	0.055	0.276	0.184	344132	628319	203035	363630	101368
Track_39	10	1	1	0	0	0	10640	3192	13832	1016	39	39	51817	46411	0	0.302	0.542	0.079	0.249	0.156	501168	1068652	207718	483344	304864
Track_40	19	3	1	0	0	0	22344	4256	26600	3908	40	40	55576	50518	0	0.411	1048	0.034	0.383	0.281	395469	634400	203797	388425	139508
Track_46	17	1	1	0	0	0	18088	6384	24472	0.508	46	46	50622	69323	0	0.18	0.403	0.05	0.203	0.104	335609	487656	208979	303544	79287
Track_50	31	0	0	0	0	0	31920	7448	39368	6513	50	50	57425	82106	0	0.292	0.525	0.084	0.326	0.139	437243	827584	214235	433294	157291
Track_56	19	3	2	0	0	0	23408	9576	32984	2015	56	56	51195	64727	0	0.331	0.93	0.112	0.295	0.223	336023	543979	212182	322366	93346
Track_58	20	0	0	0	0	0	20216	10640	30856	3118	58	58	52188	62113	0	0.318	0.925	0.024	0.258	0.249	471410	860098	210204	444514	161087
Track_60	34	3	1	0	0	0	38304	10640	48944	4663	60	60	55554	42094	0	0.335	1249	0.04	0.249	0.295	402547	992808	200280	314088	210055
Track_61	11	0	0	0	0	0	10640	11704	22344	0.412	61	61	56838	85441	0	0.338	1010	0.094	0.311	0.258	413586	634715	207352	411429	114520
Track_65	34	0	0	0	0	0	35112	13832	48944	6178	65	65	55316	78859	0	0.265	0.725	0.037	0.223	0.161	390874	682105	226341	352453	114009
Track_66	14	1	1	0	0	0	14896	13832	28728	1936	66	66	50507	48348	0	0.362	1307	0.007	0.316	0.318	332597	464840	217679	335987	78554
Track_68	17	0	0	0	0	0	17024	14896	31920	4310	68	68	56026	76996	0	0.31	0.647	0.063	0.268	0.144	553266	846911	259316	574939	175768
Track_71	19	0	0	0	0	0	19152	15960	35112	3906	71	71	53583	61025	0	0.373	0.94	0.083	0.327	0.232	480157	845131	210941	471291	154472
Track_73	25	0	0	0	0	0	25536	15960	41496	5217	73	73	58465	88060	0	0.316	0.586	0.065	0.313	0.159	468041	736240	296213	460054	118477
Track_75	13	1	2	0	0	0	14896	17024	31920	3998	75	75	54337	72024	0	0.402	0.734	0.203	0.384	0.17	446513	783449	206229	479490	166606
Track_77	26	0	0	0	0	0	26600	18088	44688	5442	77	77	54092	53179	0	0.276	1081	0.052	0.204	0.242	464943	771916	200768	439644	168453
Track_79	11	0	0	0	0	0	10640	19152	29792	2066	79	79	51173	57848	0	0.284	0.618	0.006	0.265	0.199	444620	888463	219055	397099	189471
Track_87	35	1	1	0	0	0	37240	21280	58520	2507	87	87	52625	65685	0	0.329	0.738	0.047	0.297	0.181	495790	800477	238033	535659	140706
Track_90	13	0	0	0	0	0	12768	22344	35112	1192	90	90	53982	50184	0	0.267	1134	0.03	0.148	0.321	322335	522525	204359	329376	98651
Track_97	25	0	0	0	0	0	25536	23408	48944	4933	97	97	55581	77124	0	0.268	0.69	0.049	0.265	0.151	520920	822860	237381	521472	139291
Track_98	28	1	1	0	0	0	29792	23408	53200	1443	98	98	51036	50007	0	0.248	1009	0.046	0.197	0.196	278737	360140	207308	274149	34771
Track_100	12	1	2	0	0	0	13832	24472	38304	1263	100	100	50500	63026	0	0.252	0.603	0.047	0.19	0.171	353090	613240	202873	337476	113128
Track_101	27	0	0	0	0	0	27664	24472	52136	6211	101	101	53617	59256	0	0.291	0.683	0.065	0.298	0.148	453315	849955	207715	439940	151535
Track_104	33	1	1	0	0	0	35112	28728	63840	6344	104	104	55621	77192	0	0.29	0.711	0.007	0.253	0.157	550474	752147	267455	562088	137689
Track_106	14	1	2	0	0	0	15960	28728	44688	4166	106	106	50941	46489	0	0.299	0.447	0.102	0.322	0.112	506888	746990	337618	516493	129492
Track_108	10	1	1	0	0	0	10640	29792	40432	1614	108	108	56368	79768	0	0.296	1239	0.098	0.213	0.36	549775	821694	201291	612886	206470
Track_110	26	1	1	0	0	0	27664	30856	58520	1473	110	110	51085	62321	0	0.402	1332	0.039	0.318	0.309	337629	636653	203215	331545	107624
Track_111	18	2	2	0	0	0	21280	30856	52136	0.331	111	111	50890	67417	0	0.316	0.653	0.139	0.243	0.172	391256	703894	204646	417144	133079
Track_118	25	3	2	0	0	0	29792	31920	61712	4232	118	118	52440	70228	0	0.334	0.978	0.05	0.307	0.226	385919	876162	215192	319405	171958
Track_119	10	1	1	0	0	0	10640	34048	44688	0.872	119	119	54514	45995	0	0.318	1180	0.103	0.189	0.341	306359	466304	200873	335591	75793
Track_127	16	0	0	0	0	0	15960	38304	54264	0.624	127	127	51325	75491	0	0.239	0.575	0.035	0.244	0.145	394908	494335	241684	415571	66603
Track_128	24	1	1	0	0	0	25536	38304	63840	5572	128	128	54780	46308	0	0.298	0.566	0.06	0.295	0.142	423748	879555	207644	392128	185857
Track_132	14	0	0	0	0	0	13832	39368	53200	0.797	132	132	51828	66608	0	0.256	0.526	0.092	0.224	0.132	393611	702713	204752	377507	148682
Track_133	14	1	2	0	0	0	15960	39368	55328	0.704	133	133	52375	74957	0	0.338	1370	0.053	0.22	0.354	357322	765917	201909	276741	178908
Track_134	21	2	1	0	0	0	23408	40432	63840	1371	134	134	51166	60299	0	0.342	0.998	0.047	0.313	0.262	367282	715109	220715	312907	149480
Track_152	15	1	1	0	0	0	15960	47880	63840	3225	152	152	52429	69097	0	0.292	0.654	0.072	0.3	0.142	396589	558111	220079	434733	111715
Track_153	12	0	0	0	0	0	11704	48944	60648	3404	153	153	55296	50315	0	0.366	0.889	0.019	0.323	0.237	459220	613847	256826	468209	105486
Track_156	10	2	1	0	0	0	11704	50008	61712	3301	156	156	52736	73948	0	0.544	1205	0.135	0.514	0.341	293065	429055	206613	291733	71796
Track_157	14	0	0	0	0	0	13832	50008	63840	1487	157	157	51437	75787	0	0.188	0.443	0.003	0.183	0.133	421708	650225	255263	393065	122507
Track_162	11	1	1	0	0	0	11704	51072	62776	0.228	162	162	51092	49961	0	0.372	0.929	0.155	0.312	0.227	237030	305445	203322	223680	34400
Track_163	13	0	0	0	0	0	12768	51072	63840	2677	163	163	53140	51884	0	0.304	0.453	0.107	0.341	0.115	493927	692196	326848	510410	118488
Track_164	13	0	0	0	0	0	12768	51072	63840	2793	164	164	55721	78136	0	0.329	0.637	0.145	0.298	0.164	547399	894972	226506	508471	214051

## Sheet: Auxin L1 animal 5
																Mean speed										Average
Track_1	25	0	0	0	0	0	25536	0	25536	1538	1	1	28317	26362	0	0.319	1250	0.024	0.166	0.331	426910	871220	209770	415955	161504	0.286483
Track_2	46	2	2	0	0	0	51072	0	51072	4102	2	2	25984	27827	0	0.263	1226	0.028	0.223	0.223	509424	1127564	201667	426752	256906
Track_3	19	1	1	0	0	0	20216	0	20216	2334	3	3	50911	23117	0	0.131	0.362	0.016	0.121	0.093	352947	582657	216548	325504	103523
Track_4	10	2	2	0	0	0	13832	0	13832	2419	4	4	28374	26499	0	0.46	0.986	0.191	0.413	0.255	348820	757309	202063	243808	187014
Track_6	44	3	1	0	0	0	48944	0	48944	0.585	6	6	25843	29064	0	0.267	0.997	0.022	0.222	0.184	620382	1576753	208150	564052	311907
Track_7	11	0	0	0	0	0	10640	0	10640	2343	7	7	46193	22348	0	0.229	0.546	0.028	0.212	0.147	677533	995552	351115	739048	221819
Track_10	13	0	0	0	0	0	12768	0	12768	2793	10	10	54694	23912	0	0.226	0.311	0.144	0.251	0.062	668841	886086	353452	737956	153265
Track_13	13	0	0	0	0	0	12768	1064	13832	0.348	13	13	34608	24775	0	0.178	0.609	0.018	0.187	0.152	374261	583806	248156	337701	91349
Track_14	38	3	2	0	0	0	43624	0	43624	2512	14	14	28199	27601	0	0.292	1003	0.014	0.211	0.243	518019	1230387	225013	492781	246664
Track_17	14	0	0	0	0	0	13832	0	13832	1313	17	17	50264	23799	0	0.206	0.484	0.063	0.159	0.139	426482	637059	209697	501041	132867
Track_18	18	1	1	0	0	0	19152	0	19152	1808	18	18	36204	26931	0	0.178	0.393	0.059	0.18	0.104	414728	777289	227327	398263	141671
Track_19	16	0	0	0	0	0	15960	0	15960	2773	19	19	35884	24326	0	0.314	0.871	0.055	0.219	0.256	585599	1048655	292634	534576	212712
Track_20	16	0	0	0	0	0	15960	0	15960	0.678	20	20	37280	23807	0	0.309	1028	0.036	0.256	0.28	512273	970985	204137	417507	250314
Track_23	19	0	0	0	0	0	19152	0	19152	2852	23	23	53392	22446	0	0.16	0.364	0.063	0.13	0.091	474839	830750	223327	427445	174630
Track_24	37	2	2	0	0	0	42560	0	42560	0.968	24	24	34996	24069	0	0.298	1255	0.048	0.233	0.229	442952	832873	244336	453595	143120
Track_26	27	3	2	0	0	0	31920	0	31920	0.175	26	26	34124	23139	0	0.211	0.621	0.028	0.204	0.154	671876	1106697	238836	706710	202543
Track_30	28	1	1	0	0	0	29792	0	29792	6340	30	30	32556	26427	0	0.228	0.388	0.047	0.223	0.102	684780	1225430	241872	685188	210129
Track_34	51	1	1	0	0	0	54264	2128	56392	3802	34	34	48476	22335	0	0.259	1077	0.028	0.22	0.2	470200	895656	213932	420667	179486
Track_35	10	2	2	0	0	0	12768	2128	14896	1273	35	35	25898	27120	0	0.254	0.531	0.101	0.219	0.148	331780	605016	210297	299085	129540
Track_42	20	1	2	0	0	0	22344	6384	28728	2137	42	42	36337	23057	0	0.349	1387	0.036	0.224	0.332	426033	822146	208979	393720	186118
Track_43	21	1	2	0	0	0	23408	6384	29792	2517	43	43	54439	26910	0	0.281	0.673	0.034	0.252	0.173	525184	845922	204602	520876	209602
Track_44	52	1	2	0	0	0	56392	7448	63840	2896	44	44	34979	24887	0	0.28	0.833	0.013	0.268	0.163	500833	1376657	208011	437803	264220
Track_45	16	0	0	0	0	0	15960	7448	23408	1081	45	45	26468	30850	0	0.251	1082	0.045	0.161	0.307	424966	678976	201417	450461	148581
Track_46	13	0	0	0	0	0	12768	7448	20216	3013	46	46	18527	33839	0	0.272	0.611	0.105	0.249	0.146	539812	1084981	200102	570138	228233
Track_47	16	0	0	0	0	0	15960	7448	23408	3198	47	47	42010	23377	0	0.299	0.622	0.042	0.293	0.164	565658	1134608	202491	634961	273120
Track_50	17	2	2	0	0	0	20216	5320	25536	1737	50	50	26449	28865	0	0.248	0.611	0.009	0.262	0.159	658880	1113543	200920	697792	275957
Track_51	49	0	0	0	0	0	51072	9576	60648	5796	51	51	33747	24874	0	0.322	1130	0.029	0.267	0.248	412138	844474	201575	403290	154428
Track_52	9	1	2	0	0	0	10640	8512	19152	0.947	52	52	21414	29823	0	0.264	0.529	0.077	0.181	0.188	329331	516188	210194	299416	104110
Track_53	21	1	1	0	0	0	22344	10640	32984	0.937	53	53	24605	27770	0	0.321	1293	0.04	0.314	0.273	510091	1023839	208492	493240	245227
Track_54	9	2	2	0	0	0	11704	10640	22344	2302	54	54	57383	25429	0	0.511	1267	0.125	0.28	0.478	238687	361105	201004	216179	49428
Track_55	13	0	0	0	0	0	12768	10640	23408	1929	55	55	43876	23330	0	0.254	0.489	0.082	0.291	0.119	467114	865444	201786	470005	190717
Track_58	26	2	2	0	0	0	29792	11704	41496	1742	58	58	29263	29255	0	0.257	1205	0.044	0.184	0.234	390135	680834	200829	369771	121283
Track_61	15	2	2	0	0	0	18088	12768	30856	1706	61	61	18611	30582	0	0.251	0.949	0.012	0.169	0.261	407485	659710	208241	423676	135853
Track_64	12	0	0	0	0	0	11704	12768	24472	1449	64	64	54247	23405	0	0.222	0.429	0.034	0.24	0.134	364625	556879	239651	335004	94466
Track_67	19	1	1	0	0	0	20216	13832	34048	3075	67	67	25250	31843	0	0.312	1039	0.088	0.234	0.251	379719	872563	201342	380607	175166
Track_70	17	1	2	0	0	0	19152	13832	32984	1577	70	70	33916	25291	0	0.256	0.468	0.114	0.234	0.109	446433	824658	231787	374043	192969
Track_71	14	1	1	0	0	0	14896	14896	29792	2460	71	71	55143	26801	0	0.515	1206	0.079	0.229	0.43	414126	886812	201381	371053	193569
Track_73	22	1	2	0	0	0	24472	14896	39368	2532	73	73	56442	24585	0	0.225	0.687	0.074	0.21	0.13	486720	780309	206409	560306	176000
Track_74	34	3	1	0	0	0	38304	14896	53200	5122	74	74	35035	25025	0	0.302	1075	0.007	0.179	0.326	384166	758823	204248	332891	163177
Track_75	20	2	1	0	0	0	22344	14896	37240	1557	75	75	32121	24085	0	0.296	1015	0.018	0.25	0.254	432040	927876	231364	389632	185066
Track_76	11	0	0	0	0	0	10640	15960	26600	2905	76	76	36432	25061	0	0.37	1018	0.076	0.359	0.276	561101	1043002	200013	627379	283714
Track_78	15	0	0	0	0	0	14896	15960	30856	2413	78	78	18966	32269	0	0.282	0.625	0.033	0.274	0.187	410391	693077	264987	362546	124101
Track_79	11	0	0	0	0	0	10640	17024	27664	3203	79	79	33461	28924	0	0.353	1247	0.105	0.22	0.353	522653	847683	204290	501505	187119
Track_80	12	0	0	0	0	0	11704	17024	28728	2469	80	80	18257	31100	0	0.223	0.509	0.03	0.192	0.134	488185	1006415	249145	441515	191998
Track_82	25	1	1	0	0	0	26600	17024	43624	4874	82	82	55206	24390	0	0.211	0.394	0.043	0.212	0.107	451774	971084	200177	402493	170071
Track_85	13	4	2	0	0	0	19152	18088	37240	2546	85	85	45768	23316	0	0.309	1246	0.023	0.158	0.346	357044	596230	201891	331206	123351
Track_88	26	2	2	0	0	0	30856	19152	50008	3665	88	88	41858	22498	0	0.269	0.61	0.009	0.256	0.204	432975	710060	210103	441795	123933
Track_89	11	0	0	0	0	0	10640	20216	30856	0.546	89	89	23644	28893	0	0.39	1019	0.032	0.337	0.337	452835	795085	210763	346966	207671
Track_93	34	4	2	0	0	0	41496	20216	61712	2392	93	93	34475	24025	0	0.277	0.714	0.035	0.252	0.155	431907	900573	203620	410138	184463
Track_95	20	1	1	0	0	0	21280	21280	42560	1428	95	95	37136	24843	0	0.355	1075	0.039	0.3	0.293	432444	881210	209396	321548	222751
Track_98	33	2	2	0	0	0	37240	21280	58520	3141	98	98	26141	28950	0	0.364	1230	0.085	0.282	0.289	513938	1159292	206224	449116	236799
Track_100	14	1	1	0	0	0	14896	22344	37240	1469	100	100	17884	35340	0	0.204	0.545	0.026	0.171	0.158	356955	566344	205424	408657	120240
Track_102	19	0	0	0	0	0	19152	22344	41496	2603	102	102	32570	30265	0	0.252	0.515	0.063	0.274	0.106	621283	1383643	261850	644987	274752
Track_103	29	1	1	0	0	0	30856	23408	54264	5442	103	103	32372	26655	0	0.236	0.444	0.054	0.215	0.113	514775	867403	211959	470425	211095
Track_106	11	1	2	0	0	0	12768	26600	39368	0.437	106	106	57390	26459	0	0.267	0.619	0.031	0.285	0.201	455493	828798	203778	356876	228277
Track_107	33	2	2	0	0	0	37240	26600	63840	5045	107	107	34336	27941	0	0.293	0.717	0.099	0.29	0.168	514250	986711	243290	494212	178830
Track_109	14	0	0	0	0	0	13832	25536	39368	2217	109	109	22967	29632	0	0.31	0.817	0.033	0.317	0.258	381963	833194	251207	366674	142717
Track_112	28	3	2	0	0	0	34048	28728	62776	0.293	112	112	28054	28523	0	0.354	1068	0.053	0.294	0.246	534606	1056117	202158	488110	247740
Track_114	18	1	1	0	0	0	19152	29792	48944	1496	114	114	24341	29193	0	0.29	0.714	0.042	0.299	0.172	413585	721154	201221	414256	155480
Track_116	15	1	1	0	0	0	15960	29792	45752	3309	116	116	53419	26945	0	0.226	0.397	0.038	0.254	0.113	503752	773956	271641	509762	162589
Track_117	12	0	0	0	0	0	11704	29792	41496	0.975	117	117	27677	28788	0	0.347	0.932	0.169	0.259	0.228	712467	1525780	260078	619306	333818
Track_120	30	1	1	0	0	0	31920	31920	63840	1786	120	120	30484	29215	0	0.23	1052	0.01	0.186	0.202	509088	786806	251316	529057	151972
Track_122	20	2	1	0	0	0	22344	31920	54264	5851	122	122	55939	24290	0	0.285	0.785	0.042	0.31	0.196	448992	696577	256292	446677	137189
Track_125	21	0	0	0	0	0	21280	32984	54264	3868	125	125	37153	25735	0	0.251	0.569	0.052	0.227	0.132	445214	712882	286379	459572	125354
Track_126	11	0	0	0	0	0	10640	32984	43624	0.47	126	126	16145	31607	0	0.312	1271	0	0.117	0.499	407585	560255	242275	469978	127007
Track_132	18	3	1	0	0	0	21280	32984	54264	1949	132	132	24588	30384	0	0.304	0.793	0.032	0.254	0.184	313361	540667	201229	314167	79854
Track_138	22	1	2	0	0	0	24472	39368	63840	0.012	138	138	22483	29204	0	0.389	1099	0.07	0.283	0.274	309222	494281	203932	295720	71647
Track_141	10	1	1	0	0	0	10640	39368	50008	2617	141	141	25972	31049	0	0.268	0.374	0.162	0.27	0.071	278973	354269	201696	304377	51510
Track_142	23	1	1	0	0	0	24472	39368	63840	3410	142	142	22908	30768	0	0.357	1374	0.046	0.292	0.299	361245	742460	206041	351389	130443
Track_147	22	0	0	0	0	0	22344	41496	63840	1376	147	147	36187	24166	0	0.365	1245	0.073	0.304	0.299	499959	835936	200624	512750	175411
Track_149	20	1	2	0	0	0	22344	41496	63840	2325	149	149	24530	28627	0	0.402	1381	0.131	0.266	0.332	676262	1217263	213304	733728	278195
Track_151	17	2	2	0	0	0	21280	42560	63840	1548	151	151	29348	27028	0	0.149	0.377	0.011	0.128	0.093	379087	494096	218889	396769	92284
Track_152	23	0	0	0	0	0	23408	40432	63840	5014	152	152	33520	28741	0	0.257	0.577	0.087	0.244	0.133	468741	802673	253925	450003	153917
Track_159	17	2	1	0	0	0	19152	44688	63840	3342	159	159	49289	23925	0	0.301	0.719	0.086	0.257	0.182	549718	1002872	282265	480453	212797
Track_160	11	0	0	0	0	0	10640	45752	56392	1703	160	160	24959	33627	0	0.285	0.57	0.122	0.219	0.158	545251	831189	305268	553209	148746
Track_161	17	1	2	0	0	0	19152	44688	63840	1619	161	161	24696	30327	0	0.212	0.469	0.088	0.184	0.106	286500	456807	202792	266119	68538
Track_163	13	2	1	0	0	0	14896	48944	63840	0.679	163	163	42290	22308	0	0.175	0.316	0.04	0.181	0.081	471128	752988	220450	475477	189254
Track_164	13	2	1	0	0	0	14896	48944	63840	3007	164	164	22189	29307	0	0.438	0.914	0.077	0.452	0.261	297951	589407	200135	247682	107599
Track_165	13	0	0	0	0	0	12768	48944	61712	2848	165	165	26057	31502	0	0.281	0.609	0.083	0.273	0.133	423317	778639	210298	408142	160389
Track_169	15	0	0	0	0	0	14896	48944	63840	0.541	169	169	26266	28513	0	0.285	0.69	0.06	0.276	0.178	528128	1057914	209998	536300	215120
Track_170	13	1	2	0	0	0	14896	46816	61712	4306	170	170	38939	23369	0	0.294	0.592	0.066	0.326	0.151	547244	906177	241824	574297	168805
Track_171	15	1	1	0	0	0	15960	47880	63840	3199	171	171	57096	25545	0	0.42	1307	0.059	0.277	0.393	392025	701850	201548	348500	151288
Track_173	12	1	2	0	0	0	13832	50008	63840	2681	173	173	36188	22774	0	0.244	0.459	0.07	0.228	0.125	373466	496901	208876	411379	98974
Track_174	13	0	0	0	0	0	12768	50008	62776	2005	174	174	34221	23322	0	0.245	0.436	0.058	0.276	0.131	465350	749921	225105	413562	173003
Track_179	12	0	0	0	0	0	11704	52136	63840	2269	179	179	36682	26877	0	0.251	0.549	0.093	0.221	0.134	414971	560915	332052	389603	76324
Track_181	11	0	0	0	0	0	10640	53200	63840	2321	181	181	18962	33534	0	0.236	0.627	0.101	0.204	0.151	480912	653737	343371	458280	98484
Track_183	11	2	1	0	0	0	12768	51072	63840	0.651	183	183	32436	30221	0	0.436	1371	0.117	0.368	0.419	290093	538665	202655	240141	117026

## Sheet: Averages
Auxin L17	Auxin L1 1	Auxin L1 4	Auxin L1 5	Auxin L1 10		Control L1 5	Control L1 7	Control L1 9	Control L1 11		Mean speed = um/sec
Mean speed	Mean speed	Mean speed	Mean speed	Mean speed		Mean speed	Mean speed	Mean speed	Mean speed			Average	St dev
0.276	0.213	0.235	0.207	0.319		0.344	0.27	0.172	0.255		Auxin	0.2792	0.0818853
0.307	0.121	0.262	0.261	0.263		0.254	0.233	0.405	0.242		Control	0.325088	0.0959908
0.22	0.304	0.367	0.189	0.131		0.275	0.365	0.235	0.308
0.322	0.25	0.255	0.27	0.46		0.272	0.209	0.299	0.352
0.339	0.26	0.313	0.326	0.267		0.317	0.328	0.232	0.339		Dif between auxin and control (t.test)	1.00036e-17
0.206	0.253	0.351	0.36	0.229		0.395	0.287	0.311	0.352
0.194	0.281	0.225	0.429	0.226		0.352	0.276	0.235	0.226
0.226	0.25	0.289	0.299	0.178		0.289	0.262	0.277	0.523
0.233	0.17	0.158	0.31	0.292		0.27	0.276	0.173	0.377		Mean speed = um/min
0.365	0.313	0.232	0.311	0.206		0.429	0.235	0.481	0.376			Average	St dev
0.227	0.129	0.285	0.296	0.178		0.245	0.227	0.254	0.55		Auxin	16.752
0.179	0.222	0.282	0.531	0.314		0.295	0.215	0.138	0.493		Control	19.5053
0.313	0.275	0.172	0.207	0.309		0.271	0.299	0.336	0.125
0.183	0.24	0.287	0.454	0.16		0.347	0.261	0.455	0.257		In the paper they measure 8-11 um/min
0.236	0.152	0.197	0.321	0.298		0.302	0.298	0.282	0.297
0.119	0.384	0.24	0.292	0.211		0.299	0.424	0.259	0.498
0.471	0.208	0.272	0.302	0.228		0.33	0.24	0.323	0.302
0.41	0.283	0.337	0.411	0.259		0.358	0.2	0.265	0.252
0.212	0.216	0.247	0.18	0.254		0.298	0.233	0.323	0.308
0.398	0.199	0.276	0.292	0.349		0.357	0.293	0.356	0.378
0.363	0.166	0.469	0.331	0.281		0.231	0.229	0.23	0.264
0.176	0.322	0.3	0.318	0.28		0.23	0.426	0.38	0.352
0.241	0.264	0.469	0.335	0.251		0.327	0.342	0.245	0.404
0.431	0.436	0.152	0.338	0.272		0.244	0.437	0.419	0.249
0.461	0.188	0.249	0.265	0.299		0.366	0.391	0.49	0.413
0.419	0.235	0.286	0.362	0.248		0.328	0.244	0.228	0.154
0.322	0.243	0.298	0.31	0.322		0.371	0.302	0.359	0.356
0.325	0.269	0.238	0.373	0.264		0.297	0.432	0.184	0.24
0.336	0.234	0.371	0.316	0.321		0.341	0.302	0.484	0.244
0.346	0.207	0.305	0.402	0.511		0.261	0.262	0.21	0.466
0.406	0.198	0.199	0.276	0.254		0.287	0.339	0.615	0.327
0.351	0.274	0.262	0.284	0.257		0.37	0.329	0.177	0.382
0.302	0.258	0.173	0.329	0.251		0.277	0.236	0.141	0.256
0.194	0.102	0.336	0.267	0.222		0.33	0.243	0.276	0.421
0.295	0.167	0.18	0.268	0.312		0.219	0.114	0.284	0.316
0.376	0.322	0.176	0.248	0.256		0.364	0.222	0.457	0.321
0.514	0.193	0.262	0.252	0.515		0.291	0.18	0.299	0.279
0.388	0.231	0.311	0.291	0.225		0.27	0.278	0.314	0.35
0.331	0.294	0.322	0.29	0.302		0.249	0.174	0.168	0.321
0.296	0.168	0.273	0.299	0.296		0.256	0.194	0.288	0.289
0.348	0.224	0.172	0.296	0.37		0.304	0.202	0.253	0.233
0.228		0.137	0.402	0.282		0.344	0.164	0.395	0.335
0.252		0.253	0.316	0.353		0.247	0.33	0.608	0.437
0.394		0.233	0.334	0.223		0.268	0.345	0.426	0.184
0.413		0.221	0.318	0.211		0.356	0.25	0.325	0.263
0.176		0.15	0.239	0.309		0.271	0.33	0.246	0.231
0.247		0.205	0.298	0.269		0.312	0.26	0.303	0.241
0.326		0.533	0.256	0.39		0.214	0.325	0.247	0.429
0.376		0.199	0.338	0.277		0.261	0.228	0.265	0.337
0.146		0.267	0.342	0.355		0.325	0.29	0.225	0.24
0.256		0.226	0.292	0.364		0.239	0.18	0.36	0.277
0.304		0.166	0.366	0.204		0.398	0.138	0.516	0.285
0.206		0.345	0.544	0.252		0.243	0.32	0.303	0.261
0.263		0.288	0.188	0.236		0.298	0.13	0.357	0.237
0.262		0.485	0.372	0.267		0.229	0.245	0.355	0.23
0.411		0.31	0.304	0.293		0.303	0.275	0.292	0.203
0.295		0.392	0.329	0.31		0.252	0.197	0.34	0.485
0.529		0.386		0.354		0.337	0.199	0.406	0.331
0.244		0.34		0.29		0.227	0.146	0.24	0.315
0.294		0.239		0.226		0.325	0.123	0.293	0.228
0.261		0.354		0.347		0.331	0.241	0.331	0.255
0.428		0.506		0.23		0.347	0.257	0.221	0.322
0.297		0.243		0.285		0.311	0.241	0.618	0.256
0.331		0.24		0.251		0.355	0.127	0.332	0.205
0.333		0.314		0.312		0.33	0.177	0.292	0.253
0.219		0.3		0.304		0.343	0.432	0.223	0.29
0.332		0.2		0.389		0.323	0.413	0.304	0.226
0.372		0.237		0.268		0.349	0.237	0.29	0.408
0.27		0.346		0.357		0.338	0.191	0.21	0.408
0.198		0.308		0.365		0.352	0.346	0.363	0.381
0.055		0.297		0.402		0.205	0.258	0.299	0.389
0.267		0.316		0.149		0.336	0.198	0.246	0.372
0.374		0.235		0.257		0.244	0.23	0.408	0.376
0.306		0.196		0.301		0.283	0.349	0.307	0.464
0.311		0.392		0.285		0.201	0.135	0.221	0.271
0.275		0.262		0.212		0.339	0.193	0.275	0.294
0.271		0.25		0.175		0.352	0.2	0.239	0.292
0.292		0.294		0.438		0.351	0.352	0.311	0.357
0.261		0.256		0.281		0.184	0.064	0.208	0.276
0.199		0.28		0.285		0.247	0.253	0.375	0.226
0.476		0.263		0.294		0.319	0.238	0.67	0.266
0.27		0.109		0.42		0.333	0.137	0.392	0.226
0.172		0.226		0.244		0.26	0.354	0.329	0.278
0.289		0.282		0.245		0.317	0.3	0.3	0.544
0.348		0.201		0.251		0.331	0.427	0.38	0.217
0.197		0.252		0.236		0.284	0.369	0.273	0.185
0.248		0.166		0.436		0.277	0.187	0.365	0.16
0.298		0.305				0.245	0.296	0.332	0.55
0.209		0.287				0.3	0.351	0.233	0.246
0.159		0.287				0.312	0.296	0.328	0.351
0.257		0.138				0.337	0.563	0.362	0.336
0.305		0.111				0.555	0.427	0.163	0.244
0.132		0.142				0.376	0.153	0.388	0.405
0.281		0.236				0.446	0.298	0.425	0.247
0.345		0.221				0.533	0.203	0.313	0.371
0.168		0.193				0.36	0.209	0.297	0.25
0.186		0.284				0.446	0.44	0.171	0.222
0.363						0.461	0.35	0.297	0.361
0.358						0.42	0.133	0.237	0.331
0.289						0.366	0.163	0.299
0.199						0.43	0.193	0.247
0.29						0.443	0.223	0.233
0.213						0.442	0.25	0.286
0.335						0.374	0.248	0.43
0.181						0.319	0.17	0.324
0.347						0.354	0.382	0.21
0.529						0.397	0.57	0.263
0.177						0.391	0.335	0.212
0.292						0.404	0.283	0.298
0.3						0.389	0.506	0.345
0.206						0.433	0.325	0.347
0.365						0.302	0.267	0.18
0.188						0.345	0.266	0.123
0.234						0.353	0.29	0.283
0.252						0.431	0.22	0.392
0.167						0.299	0.173	0.37
0.291						0.396	0.221	0.192
0.213						0.457	0.279	0.288
0.314						0.389	0.209	0.211
0.269						0.327	0.232	0.376
0.273						0.382	0.251	0.312
0.314						0.405	0.312	0.359
0.276						0.438	0.394	0.235
0.29						0.384	0.383	0.259
0.184						0.389	0.408	0.228
0.158						0.414	0.239	0.228
0.21						0.434	0.321	0.133
0.218						0.352	0.204	0.219
0.215						0.34	0.053	0.261
0.223						0.404	0.505	0.281
0.102						0.376	0.181	0.283
0.387						0.508	0.163	0.235
0.184						0.355	0.252	0.276
0.138						0.286	0.288	0.178
0.281						0.394	0.366	0.162
0.248						0.258	0.581	0.472
0.263						0.361	0.281	0.166
0.158						0.462	0.167	0.219
0.296						0.418	0.442	0.204
0.152						0.335	0.364	0.319
0.249						0.345	0.294	0.248
0.227						0.397	0.071	0.267
0.253						0.419	0.305	0.22
0.268						0.386	0.361	0.282
0.373						0.374	0.544	0.227
0.207						0.372	0.282	0.413
0.42						0.36	0.355	0.22
						0.336	0.203
						0.316	0.265
						0.395	0.379
						0.407	0.352
						0.405	0.344
						0.393	0.42
						0.282	0.273
						0.335	0.273
						0.403	0.149
						0.376	0.183
						0.407	0.413
						0.473	0.103
						0.442	0.128
						0.379	0.297
						0.438	0.378
						0.374	0.172
						0.477	0.338
						0.335	0.439
						0.359	0.186
						0.436	0.264
						0.37	0.184
						0.518	0.51
						0.448	0.468
						0.427	0.472
						0.324	0.18
						0.406	0.363
						0.503	0.33
						0.32	0.107
						0.393	0.285
						0.361	0.229
						0.482	0.289
						0.358	0.311
						0.413	0.264
						0.289	0.287
						0.308	0.237
						0.444	0.16
						0.373	0.191
						0.373	0.181
						0.427	0.209
						0.405	0.288
						0.337	0.369
						0.372	0.369
						0.334	0.185
						0.32	0.208
						0.38	0.237
						0.3	0.168
						0.457	0.403
						0.463
						0.457
						0.42
						0.439
						0.482
						0.365
						0.404
						0.38
						0.473
						0.407
						0.386
						0.246
						0.379
						0.434
						0.298
						0.379
						0.338
						0.433
						0.374
						0.36
						0.382
						0.327
						0.388
						0.368
						0.466
						0.34
						0.353
						0.5
						0.457
						0.531
						0.498
						0.362
						0.405
						0.346
						0.405
						0.475
						0.43
						0.354
						0.374
						0.578
						0.411
						0.392
						0.485
						0.385
						0.408
						0.392
						0.341
						0.391
						0.325
						0.439
						0.367
						0.4
						0.435
						0.37
						0.414
						0.319
						0.383
						0.462
						0.431
						0.468
						0.387
						0.368
						0.45
						0.343
						0.408
						0.461
						0.441
						0.385
						0.442
						0.472
						0.361
						0.418
						0.319
						0.518
						0.4
						0.277
						0.416
						0.525
						0.336
						0.345
						0.426
						0.361
						0.416
						0.411
						0.388
						0.406
						0.369
						0.45
						0.35
						0.448
						0.417
						0.465
						0.427
						0.428
						0.319
						0.42
						0.445
						0.35
						0.434
						0.419
						0.361
						0.351
						0.301
						0.465
						0.38
						0.335
						0.296
						0.449
						0.349
						0.446
						0.434
						0.5
						0.476
						0.453
						0.322
						0.269
						0.443
						0.342
						0.291
						0.308
						0.392
						0.542
						0.314
						0.316
						0.378
						0.176
						0.314
						0.318
						0.223
						0.384
						0.382
						0.328
						0.467
						0.416
						0.417
						0.604
