# Supplementary material for: Epidermal PAR-6 and PKC-3 are essential for larval development of C. elegans and organize non-centrosomal microtubules
Source: eLife journal article supplement (doi:10.7554/elife.62067), 2020-12-10
Supplement: fig5-data1 [file Microtubule growth rate in seam cells 1 to 2 hours.xlsx]

## Sheet: Auxin L1 animal 1
																Mean speed										Average
Track_0	52	2	2	0	0	0	58520	0	58520	2797	0	0	27353	49014	0	0.36	1380	0.029	0.209	0.353	390008	869354	203516	361820	143022	0.279049
Track_1	22	1	1	0	0	0	23408	0	23408	2867	1	1	47347	78136	0	0.235	0.605	0.034	0.209	0.123	388808	597434	218533	387234	103590
Track_3	14	2	2	0	0	0	17024	0	17024	2477	3	3	91685	47947	0	0.217	0.454	0.052	0.214	0.124	332008	519266	201506	313493	108349
Track_5	23	1	1	0	0	0	24472	0	24472	2268	5	5	45860	77395	0	0.213	0.411	0.02	0.231	0.11	402586	577944	241285	413662	88692
Track_6	32	2	1	0	0	0	35112	0	35112	3440	6	6	76532	77553	0	0.223	1031	0.018	0.162	0.207	402096	905467	201074	365165	168369
Track_7	10	1	2	0	0	0	11704	0	11704	2180	7	7	27647	48309	0	0.247	0.488	0.056	0.195	0.155	313067	440092	203224	345793	82155
Track_8	31	1	2	0	0	0	34048	0	34048	1896	8	8	49184	78383	0	0.321	1027	0.044	0.231	0.292	315163	559917	201599	291664	89033
Track_9	24	1	1	0	0	0	25536	0	25536	2850	9	9	27144	49240	0	0.32	1155	0.056	0.211	0.299	331946	653739	203914	306063	108822
Track_10	19	0	0	0	0	0	19152	0	19152	1704	10	10	52260	79602	0	0.265	0.821	0.017	0.191	0.209	402482	744187	237804	346355	135976
Track_11	11	0	0	0	0	0	10640	0	10640	0.549	11	11	28891	48058	0	0.19	0.707	0.02	0.152	0.196	437238	671930	219277	415027	130048
Track_12	15	3	2	0	0	0	19152	0	19152	0.339	12	12	73471	78476	0	0.191	0.845	0.032	0.14	0.217	393782	627062	204756	362621	148668
Track_13	26	1	1	0	0	0	27664	0	27664	0.14	13	13	90463	49895	0	0.309	1334	0.022	0.106	0.425	337561	662827	209193	332632	105670
Track_14	38	6	2	0	0	0	47880	0	47880	4740	14	14	75298	77840	0	0.354	1108	0.029	0.221	0.321	348351	578068	215949	337157	104507
Track_15	36	6	2	0	0	0	45752	0	45752	2474	15	15	91363	48325	0	0.219	0.932	0.033	0.128	0.201	353153	692292	205134	348426	95601
Track_16	14	1	1	0	0	0	14896	1064	15960	1355	16	16	46002	79088	0	0.368	1211	0.047	0.264	0.323	264945	356689	211160	262499	43598
Track_17	10	1	1	0	0	0	10640	0	10640	0.776	17	17	45289	77331	0	0.377	1216	0.078	0.252	0.368	287877	432549	215262	277883	65292
Track_18	28	2	1	0	0	0	30856	1064	31920	2979	18	18	27845	44296	0	0.279	1027	0.027	0.236	0.219	338007	563741	201485	356435	89549
Track_20	40	3	2	0	0	0	46816	0	46816	3825	20	20	78854	76102	0	0.181	1399	0.012	0.098	0.241	341660	616934	203030	341452	102129
Track_25	10	1	1	0	0	0	10640	0	10640	1848	25	25	93962	51917	0	0.308	1160	0.045	0.104	0.366	404479	639682	230151	378429	139066
Track_26	22	3	2	0	0	0	26600	0	26600	1147	26	26	57024	81021	0	0.309	1364	0.004	0.158	0.376	380268	716846	206458	378200	144507
Track_28	22	2	1	0	0	0	24472	0	24472	3370	28	28	91828	53148	0	0.178	0.788	0.027	0.101	0.173	359793	527068	261135	358309	66287
Track_29	41	0	0	0	0	0	42560	1064	43624	1518	29	29	58797	82043	0	0.255	1139	0.012	0.195	0.253	368951	667657	201399	340661	115034
Track_31	54	1	2	0	0	0	58520	0	58520	1951	31	31	90348	51319	0	0.306	1184	0.03	0.158	0.317	293699	431793	203111	296623	64191
Track_34	12	0	0	0	0	0	11704	0	11704	0.947	34	34	92046	54848	0	0.129	0.297	0.014	0.096	0.09	440203	918576	219197	392153	193993
Track_35	11	0	0	0	0	0	10640	0	10640	0.995	35	35	51003	81771	0	0.308	0.822	0.027	0.218	0.315	346539	616782	219282	304756	117594
Track_36	45	2	2	0	0	0	50008	0	50008	5260	36	36	93692	55700	0	0.262	1376	0.021	0.156	0.316	358883	623968	203212	352325	110174
Track_40	14	0	0	0	0	0	13832	0	13832	2798	40	40	29643	55927	0	0.358	1084	0.061	0.269	0.326	351739	418244	205902	368243	52008
Track_41	56	0	0	0	0	0	58520	0	58520	0.25	41	41	65599	81640	0	0.104	0.46	0.019	0.07	0.089	404830	597622	247647	402082	80209
Track_43	13	1	1	0	0	0	13832	0	13832	1154	43	43	28361	54754	0	0.251	0.914	0.046	0.212	0.235	395684	638757	200335	411464	130958
Track_44	38	2	1	0	0	0	41496	0	41496	1671	44	44	72981	79961	0	0.312	1294	0.05	0.178	0.328	321842	677325	203336	300748	98515
Track_45	15	0	0	0	0	0	14896	0	14896	0.6	45	45	27239	50181	0	0.36	1179	0.026	0.184	0.402	291676	411201	216025	269586	63860
Track_47	11	0	0	0	0	0	10640	0	10640	0.329	47	47	92518	51275	0	0.432	1242	0.059	0.317	0.432	307686	472148	228898	274841	76987
Track_49	19	0	0	0	0	0	19152	0	19152	1705	49	49	74944	79484	0	0.37	1104	0.035	0.215	0.336	378389	524453	243215	367988	85715
Track_50	17	1	2	0	0	0	19152	0	19152	1435	50	50	74621	80423	0	0.281	0.942	0.035	0.136	0.316	276381	448701	200892	239124	84294
Track_51	52	3	2	0	0	0	58520	0	58520	0.64	51	51	92591	53249	0	0.258	1275	0.018	0.163	0.29	374598	797374	206108	365010	116796
Track_52	32	0	0	0	0	0	32984	0	32984	3728	52	52	49175	81236	0	0.221	0.477	0.033	0.185	0.121	552954	1229737	300846	519703	222615
Track_53	26	2	1	0	0	0	28728	0	28728	1838	53	53	89806	52013	0	0.199	0.868	0.014	0.142	0.21	400940	748234	204742	381693	152556
Track_54	15	1	2	0	0	0	17024	0	17024	0.747	54	54	50849	79759	0	0.28	0.833	0.062	0.18	0.246	348857	553909	238613	326048	96741
Track_56	51	1	2	0	0	0	55328	0	55328	0.374	56	56	54995	81129	0	0.311	1288	0.016	0.191	0.314	358635	768018	202856	300903	139733
Track_57	11	0	0	0	0	0	10640	0	10640	1871	57	57	90027	52550	0	0.362	0.715	0.062	0.349	0.228	373539	625137	237895	377826	119715
Track_59	52	4	1	0	0	0	58520	0	58520	2293	59	59	48056	80198	0	0.215	0.702	0.021	0.161	0.156	422513	730723	242626	433556	116908
Track_60	15	0	0	0	0	0	14896	0	14896	1440	60	60	92640	57318	0	0.155	0.431	0.028	0.14	0.115	564106	804566	273196	591151	181134
Track_61	11	0	0	0	0	0	10640	0	10640	2833	61	61	56707	82608	0	0.355	1023	0.057	0.168	0.359	359765	525611	210443	355063	107234
Track_62	44	2	2	0	0	0	48944	0	48944	6826	62	62	30225	61269	0	0.287	1339	0.032	0.194	0.302	305816	500127	206253	290909	80892
Track_63	47	3	2	0	0	0	54264	0	54264	1906	63	63	60992	82760	0	0.216	1015	0.014	0.159	0.222	313349	619527	200530	306088	88805
Track_64	44	0	0	0	0	0	45752	0	45752	5234	64	64	90719	55218	0	0.206	1000	0.011	0.145	0.196	444487	840960	210636	424652	159093
Track_66	41	1	2	0	0	0	44688	0	44688	2548	66	66	56417	82150	0	0.246	1284	0.021	0.182	0.256	432929	1199113	203563	353359	224692
Track_68	14	0	0	0	0	0	13832	0	13832	0.294	68	68	57900	83471	0	0.143	0.381	0.01	0.07	0.123	444997	726229	219300	451745	166791
Track_70	14	0	0	0	0	0	13832	0	13832	1009	70	70	64573	82922	0	0.189	1151	0.047	0.081	0.303	339510	414090	236019	363150	54541
Track_72	12	1	2	0	0	0	13832	0	13832	1232	72	72	29893	58690	0	0.291	1243	0.048	0.168	0.335	342244	436574	229731	334193	68796
Track_73	24	1	1	0	0	0	25536	0	25536	0.314	73	73	63178	83146	0	0.358	1182	0.027	0.201	0.387	294144	586718	204074	267163	92316
Track_74	23	1	2	0	0	0	25536	0	25536	2633	74	74	90321	57722	0	0.206	0.811	0.028	0.155	0.198	490658	808514	247969	463144	155851
Track_75	17	0	0	0	0	0	17024	0	17024	0.851	75	75	61961	83057	0	0.343	0.914	0.025	0.237	0.284	301766	437373	211241	313627	64280
Track_76	18	0	0	0	0	0	18088	1064	19152	1736	76	76	88938	59094	0	0.215	0.896	0.04	0.171	0.192	540137	871807	265179	566359	189045
Track_80	24	0	0	0	0	0	24472	0	24472	0.785	80	80	67433	81815	0	0.22	0.534	0.028	0.179	0.15	346804	504160	212762	366651	75093
Track_81	37	1	2	0	0	0	40432	1064	41496	1537	81	81	89908	55782	0	0.221	1265	0.007	0.153	0.273	385485	1062282	210343	319817	184929
Track_83	53	2	1	0	0	0	57456	0	57456	2777	83	83	70886	80731	0	0.288	1026	0.01	0.209	0.254	352550	742948	201913	340268	111181
Track_84	28	0	0	0	0	0	28728	0	28728	1050	84	84	64597	81981	0	0.184	0.971	0.016	0.1	0.226	425045	833113	233162	404861	119510
Track_85	24	1	2	0	0	0	26600	0	26600	1030	85	85	55707	81213	0	0.244	0.695	0.022	0.251	0.18	355216	739012	201391	339051	124009
Track_87	11	1	2	0	0	0	12768	0	12768	0.158	87	87	67288	82666	0	0.287	0.552	0.074	0.276	0.162	273226	347606	206755	266952	43993
Track_89	26	1	1	0	0	0	27664	0	27664	2501	89	89	30864	56223	0	0.281	1038	0.01	0.183	0.293	320628	717500	206014	286548	125517
Track_92	32	1	2	0	0	0	35112	0	35112	1152	92	92	63035	82420	0	0.201	0.97	0.002	0.141	0.245	338806	581617	219928	316908	82987
Track_93	33	2	2	0	0	0	38304	0	38304	0.578	93	93	88731	57612	0	0.188	0.771	0.013	0.135	0.18	446717	850002	224352	431334	166694
Track_95	12	0	0	0	0	0	11704	0	11704	1692	95	95	31163	63395	0	0.31	1280	0.044	0.195	0.352	354254	553444	223842	322337	96634
Track_97	27	0	0	0	0	0	27664	0	27664	2693	97	97	89090	62305	0	0.196	0.58	0.01	0.138	0.154	428231	788985	208160	430148	134508
Track_98	13	1	1	0	0	0	13832	0	13832	1460	98	98	87782	63568	0	0.421	1217	0.057	0.315	0.363	406433	720337	243456	403888	142356
Track_100	28	2	1	0	0	0	30856	0	30856	1627	100	100	87346	63795	0	0.323	0.936	0.05	0.245	0.264	499305	961873	200790	425730	220735
Track_101	15	1	1	0	0	0	15960	0	15960	0.34	101	101	40675	12745	0	0.196	0.901	0.028	0.136	0.213	292336	421457	209564	275661	62731
Track_104	12	0	0	0	0	0	11704	0	11704	1149	104	104	34290	65537	0	0.276	1022	0.031	0.151	0.279	342615	495816	243606	335815	69667
Track_105	25	1	2	0	0	0	27664	0	27664	1542	105	105	88401	60981	0	0.263	0.931	0.017	0.144	0.246	423303	818738	206404	401570	150998
Track_107	43	2	2	0	0	0	48944	0	48944	2492	107	107	88196	61544	0	0.29	1038	0.046	0.201	0.252	457406	1023297	203582	414687	187800
Track_108	52	3	2	0	0	0	58520	0	58520	0.095	108	108	87525	61873	0	0.207	1228	0.004	0.127	0.242	637683	1212934	203243	591582	247463
Track_109	15	0	0	0	0	0	14896	0	14896	2854	109	109	33261	62251	0	0.281	1065	0.034	0.27	0.253	393301	619821	235788	348708	129211
Track_110	16	1	1	0	0	0	17024	0	17024	2575	110	110	88745	61544	0	0.573	1266	0.051	0.505	0.49	430657	935244	216800	393356	228640
Track_111	27	1	1	0	0	0	28728	0	28728	3354	111	111	35785	65711	0	0.23	0.635	0.024	0.212	0.156	418710	725445	227497	406272	114355
Track_112	11	0	0	0	0	0	10640	0	10640	0.848	112	112	36259	67522	0	0.187	0.476	0.041	0.159	0.149	333837	542597	202999	328055	89306
Track_114	27	3	1	0	0	0	30856	0	30856	2496	114	114	34154	66918	0	0.301	1228	0.019	0.158	0.339	309577	571195	202402	295654	82121
Track_115	15	1	1	0	0	0	15960	0	15960	0.055	115	115	86278	67533	0	0.121	0.27	0.016	0.11	0.074	346376	534530	219326	344610	95084
Track_116	28	1	2	0	0	0	30856	0	30856	1685	116	116	33997	67268	0	0.281	1022	0.01	0.183	0.294	293472	455826	203057	261642	74908
Track_117	21	0	0	0	0	0	21280	0	21280	2305	117	117	87257	65787	0	0.221	0.454	0.023	0.217	0.135	460567	636309	221426	506038	124864
Track_118	17	0	0	0	0	0	17024	0	17024	2517	118	118	31992	64025	0	0.202	0.379	0.068	0.224	0.111	485678	778528	230532	512772	153821
Track_119	13	0	0	0	0	0	12768	0	12768	0.224	119	119	86896	66378	0	0.298	0.715	0.018	0.218	0.25	371578	722543	206206	367635	135560
Track_123	26	1	2	0	0	0	28728	0	28728	1397	123	123	33821	64205	0	0.328	1078	0.049	0.25	0.266	345558	749121	205857	335896	116742
Track_125	11	1	1	0	0	0	11704	0	11704	0.115	125	125	83413	70170	0	0.22	0.557	0.096	0.214	0.129	319700	497109	214909	314365	74531
Track_126	21	1	2	0	0	0	23408	0	23408	0.391	126	126	28665	27574	0	0.29	1120	0.042	0.304	0.237	288257	436541	216170	285147	52648
Track_127	12	0	0	0	0	0	11704	0	11704	1748	127	127	38376	69896	0	0.24	1020	0.026	0.174	0.284	441215	840149	205301	460097	172101
Track_128	48	3	1	0	0	0	53200	0	53200	3289	128	128	28430	28579	0	0.263	1092	0.056	0.188	0.225	284594	459788	201992	270472	65270
Track_131	11	2	2	0	0	0	14896	1064	15960	0.536	131	131	26872	31081	0	0.228	0.638	0.097	0.185	0.161	304992	477147	204933	282238	81482
Track_132	24	1	1	0	0	0	25536	0	25536	1097	132	132	39147	71038	0	0.265	0.939	0.033	0.179	0.226	358984	600184	201061	366585	111967
Track_133	50	5	2	0	0	0	58520	0	58520	1382	133	133	84172	69768	0	0.31	1082	0.041	0.166	0.266	416086	945868	201034	373794	167708
Track_136	39	1	1	0	0	0	41496	0	41496	3568	136	136	85934	67509	0	0.209	0.886	0.034	0.184	0.169	518271	1220750	240455	479103	200669
Track_137	13	1	2	0	0	0	14896	1064	15960	1954	137	137	29569	27040	0	0.259	0.416	0.065	0.277	0.108	247925	333659	202164	216308	48726
Track_138	11	0	0	0	0	0	10640	0	10640	0.979	138	138	84270	70305	0	0.229	0.795	0.05	0.134	0.239	547075	1020821	205738	494299	243969
Track_139	25	0	0	0	0	0	25536	0	25536	1489	139	139	83584	72610	0	0.233	1094	0.028	0.137	0.285	379876	681770	228127	357716	120334
Track_140	21	2	2	0	0	0	25536	0	25536	0.352	140	140	26335	35743	0	0.281	1103	0.07	0.153	0.288	266344	418235	201524	263019	47071
Track_141	13	0	0	0	0	0	12768	0	12768	0.928	141	141	39195	73918	0	0.163	0.373	0.016	0.155	0.116	632944	787603	414983	689946	117510
Track_142	41	2	2	0	0	0	45752	0	45752	4365	142	142	82160	74198	0	0.187	0.652	0.031	0.134	0.145	483344	824470	203436	440054	181733
Track_144	12	1	1	0	0	0	12768	0	12768	0.734	144	144	39802	72305	0	0.417	1009	0.045	0.318	0.332	307992	420816	200558	323469	61622
Track_145	29	1	1	0	0	0	30856	0	30856	0.158	145	145	37646	72537	0	0.256	0.745	0.017	0.236	0.151	357687	630586	211710	341469	112909
Track_147	47	5	2	0	0	0	57456	1064	58520	6098	147	147	27843	31961	0	0.368	1353	0.039	0.228	0.364	272706	428243	202493	265631	48208
Track_149	41	1	2	0	0	0	44688	0	44688	0.279	149	149	26176	42981	0	0.307	1307	0.023	0.218	0.273	329927	534163	202446	309850	95628
Track_150	16	0	0	0	0	0	15960	0	15960	1323	150	150	81693	74778	0	0.181	0.621	0.008	0.157	0.148	434675	735114	223637	428946	152170
Track_152	11	1	1	0	0	0	11704	0	11704	1963	152	152	78712	75178	0	0.297	0.975	0.02	0.174	0.303	300363	400897	201801	296910	69282
Track_153	23	2	2	0	0	0	26600	0	26600	3185	153	153	27759	42878	0	0.173	0.446	0.016	0.177	0.111	331616	495092	204458	315978	89514
Track_156	40	5	2	0	0	0	47880	0	47880	0.936	156	156	25625	40352	0	0.289	1128	0.038	0.197	0.295	379106	862070	202493	320083	176438
Track_157	30	2	2	0	0	0	34048	0	34048	1092	157	157	40997	74712	0	0.267	0.75	0.022	0.231	0.209	539070	1253884	218395	452130	274041
Track_158	30	1	1	0	0	0	31920	0	31920	0.209	158	158	27391	40228	0	0.252	1233	0.013	0.181	0.225	290726	436578	203606	282786	64345
Track_162	29	3	2	0	0	0	34048	0	34048	2641	162	162	88681	59340	0	0.291	0.891	0.037	0.219	0.228	397882	888880	206485	372191	157808
Track_165	27	2	1	0	0	0	29792	0	29792	4090	165	165	89655	58959	0	0.315	1247	0.011	0.175	0.341	363070	628979	206145	322837	124258
Track_166	12	1	1	0	0	0	12768	0	12768	0.581	166	166	32179	22365	0	0.317	0.859	0.082	0.139	0.299	264078	337916	203353	258136	47403
Track_176	19	3	1	0	0	0	22344	0	22344	5102	176	176	78498	75063	0	0.298	1100	0.012	0.202	0.342	344761	578077	200362	318852	115089
Track_178	9	1	2	0	0	0	10640	0	10640	0.378	178	178	44298	76028	0	0.218	0.993	0.039	0.098	0.321	374584	485845	254305	385505	66443
Track_180	51	5	1	0	0	0	58520	0	58520	1257	180	180	27829	51466	0	0.388	1242	0.016	0.287	0.301	293436	516601	204076	276415	77276
Track_181	16	1	1	0	0	0	17024	0	17024	1174	181	181	50491	78610	0	0.228	0.649	0.042	0.196	0.168	459719	684994	221184	473204	139333
Track_182	34	2	1	0	0	0	37240	0	37240	2550	182	182	71939	81168	0	0.269	1166	0.007	0.161	0.285	310816	492878	206863	304016	74483
Track_184	47	5	2	0	0	0	56392	0	56392	1762	184	184	90882	54457	0	0.394	1297	0.007	0.229	0.351	301898	682602	204542	283922	86462
Track_185	27	1	1	0	0	0	28728	2128	30856	2200	185	185	92978	55373	0	0.331	1093	0.036	0.156	0.336	366001	766952	204423	331609	119751
Track_186	30	4	1	0	0	0	35112	2128	37240	2471	186	186	73137	80752	0	0.193	0.628	0.026	0.189	0.134	343257	583904	207179	328624	88378
Track_187	17	1	1	0	0	0	18088	2128	20216	3308	187	187	33162	60800	0	0.268	0.62	0.107	0.217	0.147	375741	598201	253329	336122	102569
Track_188	23	0	0	0	0	0	23408	2128	25536	3192	188	188	93010	57761	0	0.225	0.466	0.031	0.198	0.119	454543	921247	222875	397827	168991
Track_189	23	1	2	0	0	0	25536	2128	27664	1430	189	189	32977	62084	0	0.217	0.919	0.024	0.168	0.215	386616	842728	230064	316784	158396
Track_191	18	0	0	0	0	0	18088	2128	20216	2268	191	191	29150	31126	0	0.169	0.402	0.069	0.141	0.098	328436	473831	212312	311624	78875
Track_196	49	5	1	0	0	0	56392	2128	58520	1525	196	196	74032	79088	0	0.273	1236	0.005	0.188	0.275	337686	606178	201014	320613	92429
Track_197	13	1	1	0	0	0	13832	3192	17024	1769	197	197	89088	60451	0	0.284	0.956	0.126	0.243	0.223	318895	495583	205440	277855	94005
Track_199	51	1	2	0	0	0	55328	3192	58520	3478	199	199	87644	62082	0	0.241	1065	0.018	0.153	0.238	459427	1048397	201542	442309	183392
Track_200	15	1	1	0	0	0	15960	3192	19152	2704	200	200	30781	22050	0	0.26	1200	0.012	0.188	0.316	307803	399733	203133	328415	62857
Track_203	19	0	0	0	0	0	19152	3192	22344	1424	203	203	74107	79540	0	0.249	1262	0.02	0.156	0.312	333818	621082	200320	335015	114164
Track_205	12	0	0	0	0	0	11704	3192	14896	0.977	205	205	53218	82097	0	0.333	1215	0.059	0.205	0.391	433094	637976	214259	414788	128451
Track_207	38	1	1	0	0	0	40432	4256	44688	3749	207	207	86310	66310	0	0.424	1388	0.053	0.246	0.37	470460	1127507	202202	399765	227412
Track_208	16	1	1	0	0	0	17024	4256	21280	3983	208	208	41258	74010	0	0.372	1352	0.093	0.241	0.351	341770	548044	210228	345355	88877
Track_209	23	2	2	0	0	0	26600	4256	30856	1518	209	209	38851	73395	0	0.228	0.693	0.014	0.187	0.175	408844	810710	213113	382502	151899
Track_211	16	0	0	0	0	0	15960	5320	21280	1941	211	211	54154	80049	0	0.321	0.977	0.098	0.262	0.237	335428	596596	218089	324025	91528
Track_212	12	0	0	0	0	0	11704	6384	18088	0.288	212	212	93527	50445	0	0.191	0.819	0.022	0.096	0.235	397307	602293	242084	425444	125119
Track_213	11	1	1	0	0	0	11704	5320	17024	1702	213	213	47675	79634	0	0.282	1325	0.023	0.167	0.39	298259	403704	212892	305246	58187
Track_215	14	1	2	0	0	0	15960	4256	20216	1914	215	215	60954	82579	0	0.384	1094	0.049	0.191	0.379	322278	560547	209325	310532	109003
Track_220	26	2	2	0	0	0	29792	5320	35112	2277	220	220	29749	55130	0	0.374	1349	0.071	0.299	0.306	289572	450469	204839	272010	80162
Track_222	32	2	2	0	0	0	36176	6384	42560	3120	222	222	29616	57701	0	0.274	0.948	0.055	0.234	0.197	302573	462464	202604	282246	74665
Track_223	20	1	2	0	0	0	22344	4256	26600	1312	223	223	53247	82610	0	0.336	1198	0.071	0.175	0.363	521526	889421	291096	487297	157948
Track_224	20	1	1	0	0	0	21280	5320	26600	0.823	224	224	56612	83119	0	0.304	0.895	0.11	0.242	0.2	317199	433969	200490	321553	81182
Track_226	45	0	0	0	0	0	46816	4256	51072	1337	226	226	89121	60156	0	0.273	0.96	0.02	0.201	0.251	387252	1014265	235429	346014	158904
Track_227	12	2	2	0	0	0	15960	6384	22344	1824	227	227	33199	21029	0	0.47	1373	0.071	0.326	0.405	263602	419833	203017	244403	66008
Track_228	39	2	2	0	0	0	43624	4256	47880	3268	228	228	31606	24335	0	0.317	1120	0.027	0.201	0.307	292073	531120	202697	281504	77628
Track_235	18	1	1	0	0	0	19152	7448	26600	0.834	235	235	28141	46009	0	0.285	1015	0.017	0.22	0.247	333832	537716	217123	333342	82093
Track_236	11	0	0	0	0	0	10640	7448	18088	2144	236	236	42148	76030	0	0.382	0.957	0.05	0.343	0.298	385706	825209	211725	299461	215329
Track_238	36	2	2	0	0	0	40432	7448	47880	2974	238	238	78490	78278	0	0.224	1097	0.029	0.211	0.196	364263	558375	207474	353256	103482
Track_239	22	5	2	0	0	0	28728	4256	32984	2510	239	239	77210	77182	0	0.261	0.832	0.008	0.122	0.278	280209	379413	207471	279791	49702
Track_241	40	3	2	0	0	0	45752	7448	53200	0.246	241	241	31534	57800	0	0.37	1213	0.034	0.239	0.348	303142	626592	200314	289057	89059
Track_243	14	1	1	0	0	0	14896	7448	22344	1311	243	243	57395	82719	0	0.266	0.749	0.056	0.219	0.228	393524	724320	215351	372669	152689
Track_246	46	1	2	0	0	0	50008	8512	58520	2164	246	246	92770	51162	0	0.301	1332	0.012	0.171	0.3	342382	571938	205781	345291	93528
Track_249	48	0	0	0	0	0	50008	8512	58520	3624	249	249	92905	54672	0	0.172	0.772	0.006	0.131	0.161	468537	851906	210655	459313	135759
Track_250	38	0	0	0	0	0	39368	8512	47880	1629	250	250	90168	59923	0	0.303	1058	0.005	0.153	0.319	416732	693738	203814	429963	132509
Track_252	35	2	1	0	0	0	38304	8512	46816	3406	252	252	63971	82874	0	0.245	1383	0.024	0.157	0.257	358752	634496	201004	339155	118226
Track_253	13	1	2	0	0	0	14896	8512	23408	0.643	253	253	32043	20694	0	0.424	1111	0.032	0.34	0.324	282708	605982	203002	253156	101189
Track_254	24	3	2	0	0	0	28728	8512	37240	2182	254	254	27752	38891	0	0.423	1388	0.052	0.245	0.393	288983	467661	207846	262265	70554
Track_258	13	2	2	0	0	0	15960	9576	25536	2978	258	258	37317	69402	0	0.316	0.57	0.088	0.352	0.154	288615	401681	208142	275695	51928
Track_259	11	0	0	0	0	0	10640	9576	20216	2122	259	259	27194	49201	0	0.517	0.897	0.154	0.611	0.251	300228	565754	204839	291990	94813
Track_260	46	1	1	0	0	0	48944	9576	58520	0.597	260	260	51331	81976	0	0.34	1226	0.006	0.29	0.271	453951	734756	202752	446754	153143
Track_261	30	1	1	0	0	0	31920	9576	41496	2048	261	261	90205	53325	0	0.233	0.892	0.014	0.165	0.232	391070	750773	212969	354432	134431
Track_265	15	1	1	0	0	0	15960	10640	26600	1119	265	265	32038	64714	0	0.324	0.762	0.128	0.281	0.198	279033	369021	204694	265293	51195
Track_266	44	2	1	0	0	0	47880	10640	58520	2563	266	266	36321	67472	0	0.285	0.947	0.063	0.197	0.206	315859	566418	208476	311144	85835
Track_267	11	0	0	0	0	0	10640	10640	21280	1159	267	267	40386	73357	0	0.319	1050	0.068	0.257	0.291	350173	550005	214630	335185	113974
Track_268	26	2	1	0	0	0	28728	10640	39368	2965	268	268	25682	35713	0	0.188	0.494	0.015	0.164	0.116	393046	645137	242827	372266	102820
Track_269	41	4	2	0	0	0	47880	10640	58520	0.44	269	269	26201	46707	0	0.317	1265	0.062	0.262	0.25	310428	474230	200415	276642	76727
Track_276	11	1	2	0	0	0	12768	12768	25536	1236	276	276	27811	33859	0	0.345	1066	0.039	0.28	0.335	263170	386122	205016	235650	54881
Track_277	16	1	1	0	0	0	17024	11704	28728	1602	277	277	81417	75168	0	0.317	1078	0.081	0.235	0.318	415701	694099	209528	399931	121433
Track_279	13	1	1	0	0	0	13832	12768	26600	0.114	279	279	70489	80084	0	0.191	0.477	0.062	0.17	0.132	329374	461066	212193	321239	83029
Track_280	14	1	1	0	0	0	14896	11704	26600	2216	280	280	69952	81216	0	0.173	0.287	0.045	0.213	0.091	275365	382003	202009	266402	52938
Track_281	14	0	0	0	0	0	13832	12768	26600	0.892	281	281	53675	80091	0	0.291	1026	0.007	0.18	0.326	311958	473621	219289	289096	74307
Track_282	26	1	1	0	0	0	27664	12768	40432	2401	282	282	30198	59209	0	0.259	0.961	0.03	0.191	0.238	335409	628083	212241	325891	97940
Track_283	43	1	1	0	0	0	45752	12768	58520	9067	283	283	91998	59129	0	0.318	1137	0.072	0.263	0.207	463007	869740	225707	435593	162535
Track_284	12	2	2	0	0	0	14896	12768	27664	0.672	284	284	67619	82802	0	0.249	0.877	0.051	0.198	0.23	330876	538807	208331	302747	102152
Track_286	32	0	0	0	0	0	32984	11704	44688	2795	286	286	87897	63714	0	0.238	0.865	0.03	0.168	0.243	529997	988489	216652	547562	196690
Track_290	38	4	2	0	0	0	44688	13832	58520	1410	290	290	50252	79133	0	0.293	1292	0.029	0.216	0.269	322209	596448	205053	316689	84985
Track_292	11	1	1	0	0	0	11704	13832	25536	1889	292	292	50526	81795	0	0.294	1052	0.042	0.276	0.289	348945	516271	201200	340450	109669
Track_293	32	2	1	0	0	0	35112	13832	48944	0.619	293	293	31424	64123	0	0.25	0.864	0.041	0.219	0.181	299595	501396	204254	277375	83017
Track_294	38	3	2	0	0	0	44688	13832	58520	1497	294	294	31971	60002	0	0.269	1145	0.03	0.166	0.25	310355	493753	202894	306427	68140
Track_298	35	0	0	0	0	0	36176	13832	50008	1924	298	298	85763	68166	0	0.234	0.642	0.012	0.235	0.154	532895	882906	222862	505306	179884
Track_303	41	1	1	0	0	0	43624	14896	58520	3460	303	303	89708	56606	0	0.281	1049	0.041	0.147	0.277	341702	722480	225742	323463	113763
Track_304	30	1	1	0	0	0	31920	14896	46816	1059	304	304	89049	55871	0	0.186	0.448	0.024	0.171	0.114	423855	686648	208746	436655	138289
Track_305	17	1	1	0	0	0	18088	14896	32984	0.365	305	305	53841	82541	0	0.429	1196	0.077	0.231	0.411	345790	587195	207512	301076	118793
Track_307	11	0	0	0	0	0	10640	14896	25536	1446	307	307	79636	76695	0	0.199	0.353	0.072	0.215	0.088	352191	552329	206004	360737	126956
Track_308	11	2	1	0	0	0	12768	15960	28728	2381	308	308	31990	65989	0	0.39	1349	0.135	0.291	0.38	247205	302722	200764	232395	34363
Track_312	18	0	0	0	0	0	18088	15960	34048	1479	312	312	84915	68995	0	0.27	0.867	0.064	0.184	0.218	571562	1124989	204703	603204	202283
Track_313	16	1	1	0	0	0	17024	15960	32984	0.463	313	313	28785	31965	0	0.321	1094	0.023	0.239	0.31	291403	473255	200771	278231	74400
Track_315	14	1	2	0	0	0	15960	15960	31920	1388	315	315	77666	79082	0	0.142	0.337	0.018	0.126	0.095	277709	406679	206412	291504	50978
Track_316	12	1	2	0	0	0	13832	15960	29792	2300	316	316	46299	78651	0	0.464	1344	0.047	0.221	0.442	359068	575991	233506	364152	94615
Track_317	11	1	1	0	0	0	11704	15960	27664	1443	317	317	48352	80438	0	0.183	0.402	0.059	0.176	0.112	394415	593668	200926	358486	119987
Track_319	41	0	0	0	0	0	42560	15960	58520	0.579	319	319	64383	81771	0	0.162	0.606	0.01	0.112	0.144	329545	545065	209757	301941	92508
Track_321	8	2	2	0	0	0	11704	17024	28728	3765	321	321	37853	14709	0	0.514	1322	0.131	0.285	0.487	246575	286621	202471	239821	27344
Track_322	14	2	2	0	0	0	17024	17024	34048	1962	322	322	30967	61276	0	0.244	0.674	0.109	0.207	0.146	291056	395796	214550	301704	54922
Track_326	12	0	0	0	0	0	11704	17024	28728	1445	326	326	30110	23167	0	0.224	0.804	0.042	0.184	0.205	307544	380230	232446	310912	43760
Track_327	39	0	0	0	0	0	40432	17024	57456	0.486	327	327	84327	70735	0	0.222	0.787	0.016	0.137	0.206	379873	715291	200235	363474	120035
Track_330	13	0	0	0	0	0	12768	17024	29792	1283	330	330	47733	78266	0	0.27	1213	0.033	0.227	0.312	300716	441255	218928	298060	66300
Track_331	16	1	2	0	0	0	18088	17024	35112	0.683	331	331	28488	46421	0	0.269	0.976	0.102	0.144	0.261	313481	451117	216263	311732	64482
Track_337	24	1	1	0	0	0	25536	18088	43624	0.814	337	337	41586	75194	0	0.35	1019	0.065	0.25	0.288	334453	620544	208337	304207	116745
Track_339	11	0	0	0	0	0	10640	18088	28728	0.328	339	339	92929	50562	0	0.273	0.555	0.042	0.249	0.164	280019	351539	203427	273838	49663
Track_342	25	3	1	0	0	0	28728	18088	46816	2679	342	342	68580	82282	0	0.197	0.507	0.025	0.183	0.126	326818	563386	201144	314503	90486
Track_343	20	1	2	0	0	0	22344	18088	40432	1843	343	343	65254	82531	0	0.274	0.776	0.036	0.203	0.237	293421	442910	204779	292165	66506
Track_344	28	1	1	0	0	0	29792	18088	47880	1605	344	344	59870	83113	0	0.364	1305	0.04	0.19	0.367	275474	544647	202657	250962	72044
Track_345	14	1	1	0	0	0	14896	18088	32984	1830	345	345	31224	64014	0	0.318	0.899	0.024	0.199	0.307	282910	350045	222584	272399	39620
Track_346	20	0	0	0	0	0	20216	18088	38304	1304	346	346	85964	65804	0	0.23	1031	0.056	0.155	0.233	436966	628855	221255	449871	120306
Track_348	22	1	1	0	0	0	23408	18088	41496	1851	348	348	89160	61934	0	0.277	1107	0.029	0.198	0.268	396240	547166	228258	426198	102360
Track_351	28	3	1	0	0	0	31920	19152	51072	2058	351	351	49751	81445	0	0.248	1219	0.036	0.203	0.227	380149	771647	203343	385571	120436
Track_352	14	2	2	0	0	0	18088	19152	37240	0.649	352	352	52306	80206	0	0.229	0.994	0.048	0.118	0.276	280639	399062	203309	273598	62808
Track_353	26	2	1	0	0	0	28728	19152	47880	2471	353	353	89599	52864	0	0.244	0.729	0.013	0.171	0.173	404297	989078	209306	345369	201384
Track_354	18	0	0	0	0	0	18088	19152	37240	1396	354	354	30783	56884	0	0.416	1034	0.034	0.309	0.317	306581	554268	206522	276321	94215
Track_355	33	3	2	0	0	0	39368	19152	58520	0.788	355	355	93053	56016	0	0.159	0.844	0.007	0.122	0.15	430869	898215	205115	350190	200605
Track_356	37	1	1	0	0	0	39368	19152	58520	2788	356	356	88749	57179	0	0.208	0.871	0.02	0.168	0.187	495702	1046413	207998	477304	198082
Track_360	33	2	1	0	0	0	36176	20216	56392	2761	360	360	54892	81378	0	0.323	1269	0.028	0.157	0.316	279800	464485	200598	268147	63473
Track_363	14	0	0	0	0	0	13832	20216	34048	2541	363	363	80228	73677	0	0.213	1004	0.048	0.147	0.245	488909	609620	245371	495588	103276
Track_366	22	2	2	0	0	0	25536	20216	45752	0.967	366	366	44565	76161	0	0.23	0.754	0.025	0.147	0.196	355588	804418	215998	331076	134281
Track_367	29	2	2	0	0	0	32984	20216	53200	2853	367	367	76547	78472	0	0.292	1199	0.06	0.225	0.269	347601	549369	216557	335813	88121
Track_369	31	3	1	0	0	0	35112	21280	56392	3409	369	369	87248	65062	0	0.287	0.918	0.011	0.245	0.204	374608	561573	200367	374801	94115
Track_371	21	0	0	0	0	0	21280	21280	42560	1552	371	371	83177	72035	0	0.287	1115	0.042	0.214	0.259	293498	459361	205196	281696	75126
Track_374	16	4	2	0	0	0	22344	21280	43624	2722	374	374	72300	81486	0	0.301	1157	0.06	0.138	0.298	336479	635594	206150	294223	122734
Track_375	13	0	0	0	0	0	12768	21280	34048	0.952	375	375	66422	82565	0	0.223	0.881	0.044	0.201	0.215	342787	498722	210210	355743	74933
Track_378	14	0	0	0	0	0	13832	22344	36176	2265	378	378	45885	77291	0	0.284	0.665	0.092	0.245	0.154	291881	412427	226653	290041	46812
Track_381	18	1	1	0	0	0	19152	22344	41496	0.843	381	381	93408	51373	0	0.351	1107	0.047	0.186	0.358	346704	667643	201250	338987	114272
Track_382	14	1	1	0	0	0	14896	22344	37240	1533	382	382	61041	83004	0	0.405	1348	0.045	0.19	0.411	275109	342938	236069	279836	38450
Track_384	11	1	1	0	0	0	11704	22344	34048	2454	384	384	38707	14944	0	0.32	0.991	0.022	0.209	0.295	298604	487311	219080	306042	75470
Track_387	16	1	1	0	0	0	17024	23408	40432	3024	387	387	26719	48244	0	0.425	1371	0.054	0.313	0.394	322926	515105	204838	297103	95902
Track_388	31	2	2	0	0	0	35112	23408	58520	0.55	388	388	93763	53006	0	0.405	1321	0.019	0.265	0.37	320303	542000	202875	297062	92370
Track_389	23	1	2	0	0	0	25536	23408	48944	1129	389	389	91911	57214	0	0.263	1248	0.011	0.143	0.303	312613	562014	212857	296404	86333
Track_391	31	3	1	0	0	0	35112	23408	58520	0.724	391	391	84905	69177	0	0.291	1091	0.025	0.223	0.278	457648	925964	204852	400848	190778
Track_395	27	0	0	0	0	0	27664	23408	51072	0.392	395	395	80854	75826	0	0.172	0.479	0.033	0.163	0.108	450065	837438	208326	428933	154725
Track_397	26	3	2	0	0	0	31920	24472	56392	7057	397	397	36475	68886	0	0.374	1328	0.02	0.239	0.381	297158	490358	208927	276151	78754
Track_398	13	0	0	0	0	0	12768	24472	37240	2342	398	398	38962	12531	0	0.196	0.518	0.07	0.191	0.129	282351	339462	211305	285099	30334
Track_399	9	2	1	0	0	0	10640	24472	35112	1204	399	399	79572	74488	0	0.354	0.686	0.049	0.452	0.242	246413	381790	205879	219680	54757
Track_401	17	1	1	0	0	0	18088	24472	42560	1988	401	401	52755	81938	0	0.275	1256	0.027	0.204	0.286	407667	775037	227391	377917	133575
Track_402	11	2	1	0	0	0	12768	24472	37240	1552	402	402	51026	79509	0	0.218	0.485	0.009	0.235	0.159	289377	442509	210681	270643	74683
Track_405	16	2	2	0	0	0	19152	24472	43624	1033	405	405	29159	55336	0	0.423	1269	0.081	0.244	0.423	286695	457879	203594	255676	80723
Track_406	33	0	0	0	0	0	34048	24472	58520	3380	406	406	91160	59388	0	0.287	1284	0.028	0.251	0.273	430008	743658	204924	405347	146780
Track_407	32	0	0	0	0	0	32984	25536	58520	2168	407	407	88551	59278	0	0.299	1240	0.028	0.154	0.323	403342	692182	204353	403513	133563
Track_408	25	0	0	0	0	0	25536	25536	51072	1510	408	408	89755	60886	0	0.286	1217	0.022	0.15	0.339	414297	691464	216282	380108	141526
Track_410	26	1	2	0	0	0	28728	25536	54264	2640	410	410	33767	64101	0	0.242	0.748	0.039	0.195	0.167	310384	663063	207289	295297	95448
Track_411	14	0	0	0	0	0	13832	26600	40432	1451	411	411	33150	62268	0	0.191	0.398	0.019	0.171	0.123	327039	514210	202188	298095	93699
Track_412	13	0	0	0	0	0	12768	25536	38304	0.356	412	412	33382	63923	0	0.284	0.684	0.057	0.307	0.176	296107	408108	208461	290348	61044
Track_416	20	1	1	0	0	0	21280	26600	47880	2210	416	416	26335	44789	0	0.3	0.908	0.01	0.182	0.279	300118	519025	218741	288977	74652
Track_418	30	1	2	0	0	0	32984	25536	58520	2055	418	418	79322	76253	0	0.237	1291	0.05	0.154	0.255	401942	700636	200350	396645	145132
Track_422	31	1	1	0	0	0	32984	25536	58520	2353	422	422	53192	82057	0	0.288	1082	0.008	0.206	0.26	337528	548083	213273	323491	92413
Track_423	19	0	0	0	0	0	19152	25536	44688	2739	423	423	75845	80012	0	0.281	1151	0.051	0.186	0.285	311603	517161	218347	273276	95185
Track_424	24	1	1	0	0	0	25536	25536	51072	2175	424	424	48261	80863	0	0.274	0.88	0.024	0.209	0.213	370126	595564	200184	378774	100659
Track_433	16	1	1	0	0	0	17024	27664	44688	2000	433	433	89778	57883	0	0.261	0.86	0.036	0.144	0.245	331062	732143	203499	303298	127793
Track_434	12	0	0	0	0	0	11704	27664	39368	0.891	434	434	86715	66568	0	0.19	0.56	0.044	0.116	0.164	425758	718194	253684	395006	142040
Track_435	11	1	1	0	0	0	11704	27664	39368	2675	435	435	39500	71283	0	0.445	1254	0.067	0.408	0.369	260642	347620	201952	261464	39151
Track_441	27	1	2	0	0	0	29792	28728	58520	3740	441	441	44567	78027	0	0.251	0.764	0.043	0.209	0.167	400822	769805	218999	364730	122139
Track_442	12	0	0	0	0	0	11704	28728	40432	2757	442	442	27135	45990	0	0.447	0.98	0.108	0.286	0.33	291797	513634	207790	252012	85381
Track_443	29	0	0	0	0	0	29792	28728	58520	1452	443	443	74597	80286	0	0.232	0.913	0.026	0.187	0.182	486082	749339	210510	470899	138973
Track_446	23	3	2	0	0	0	28728	28728	57456	1605	446	446	92726	50435	0	0.213	1393	0.032	0.122	0.311	287873	453578	200448	287338	65562
Track_449	25	0	0	0	0	0	25536	28728	54264	0.786	449	449	57491	83117	0	0.292	1003	0.046	0.221	0.229	382659	756195	222723	347069	138769
Track_452	26	2	1	0	0	0	28728	29792	58520	2035	452	452	69749	81798	0	0.321	1182	0.057	0.186	0.308	339842	960853	202566	295234	156305
Track_453	27	1	1	0	0	0	28728	29792	58520	2181	453	453	90279	55443	0	0.268	1113	0.026	0.187	0.293	347590	504399	204260	358061	83773
Track_454	18	2	2	0	0	0	21280	29792	51072	4255	454	454	35336	68421	0	0.334	0.989	0.146	0.309	0.202	321023	552481	200090	283588	110224
Track_455	16	1	2	0	0	0	18088	29792	47880	0.897	455	455	39169	73534	0	0.249	0.619	0.016	0.222	0.17	393823	601182	245542	411170	86386
Track_457	18	2	1	0	0	0	20216	30856	51072	4027	457	457	30516	22684	0	0.414	1318	0.05	0.238	0.44	253304	410712	204633	238569	53915
Track_459	22	4	2	0	0	0	27664	30856	58520	0.365	459	459	32168	66305	0	0.212	0.73	0.005	0.188	0.165	304864	536074	207325	273801	79940
Track_460	10	1	1	0	0	0	10640	30856	41496	0.778	460	460	35729	18546	0	0.182	0.385	0.085	0.135	0.112	248302	307353	200508	252801	35118
Track_462	18	1	2	0	0	0	20216	30856	51072	0.602	462	462	37833	72657	0	0.191	0.848	0.008	0.153	0.186	423547	679435	239594	384350	142898
Track_465	18	0	0	0	0	0	18088	30856	48944	1371	465	465	78963	77993	0	0.344	1191	0.018	0.189	0.364	383957	618543	264782	370642	99233
Track_467	22	2	1	0	0	0	24472	30856	55328	2051	467	467	27495	43141	0	0.245	1099	0.041	0.18	0.232	299878	499442	201531	262315	92487
Track_468	13	2	1	0	0	0	14896	30856	45752	1529	468	468	76312	78043	0	0.257	1294	0.019	0.172	0.336	355597	494177	215065	323261	92365
Track_470	25	1	1	0	0	0	26600	31920	58520	1416	470	470	86283	67134	0	0.199	0.579	0.017	0.147	0.147	396723	587512	229371	394515	111464
Track_472	22	2	1	0	0	0	24472	31920	56392	0.362	472	472	27445	41844	0	0.274	0.901	0.047	0.22	0.206	263110	420917	210244	242839	61437
Track_475	20	2	2	0	0	0	23408	31920	55328	3144	475	475	69499	81489	0	0.357	1283	0.094	0.233	0.301	341304	580476	200884	294008	121186
Track_477	10	1	1	0	0	0	10640	31920	42560	0.948	477	477	31845	61777	0	0.384	1187	0.059	0.326	0.387	248195	302481	209477	251137	31488
Track_481	23	0	0	0	0	0	23408	32984	56392	2171	481	481	41453	74897	0	0.185	0.99	0.02	0.121	0.218	330914	501819	201842	321253	91304
Track_483	14	1	2	0	0	0	15960	32984	48944	2866	483	483	49579	79374	0	0.457	1284	0.075	0.24	0.448	312238	561372	202171	299004	97152
Track_487	11	0	0	0	0	0	10640	32984	43624	0.941	487	487	55236	82503	0	0.49	1367	0.049	0.178	0.508	347477	559498	221954	347961	105386
Track_491	24	1	1	0	0	0	25536	32984	58520	1826	491	491	88386	62793	0	0.219	0.943	0.05	0.141	0.191	433271	638228	204762	434350	117065
Track_494	11	1	2	0	0	0	12768	34048	46816	0.821	494	494	62357	83296	0	0.184	0.341	0.08	0.177	0.081	321302	449453	258835	299666	57475
Track_495	11	1	1	0	0	0	11704	35112	46816	0.37	495	495	31787	58378	0	0.29	0.695	0.044	0.29	0.193	326203	566147	210531	282760	111060
Track_498	11	0	0	0	0	0	10640	35112	45752	1981	498	498	37841	69073	0	0.257	0.39	0.093	0.251	0.09	336565	506861	221635	287518	92957
Track_501	18	1	1	0	0	0	19152	34048	53200	1695	501	501	82956	73444	0	0.221	1003	0.02	0.16	0.22	368955	486660	206305	381060	81597
Track_503	19	2	2	0	0	0	23408	35112	58520	1544	503	503	79242	75293	0	0.308	1009	0.051	0.218	0.266	346782	721311	204688	330378	127203
Track_505	23	1	1	0	0	0	24472	34048	58520	2191	505	505	46905	77723	0	0.263	1315	0.016	0.189	0.268	314432	464353	218994	292203	63041
Track_506	17	0	0	0	0	0	17024	34048	51072	2000	506	506	46140	77532	0	0.261	0.617	0.061	0.229	0.15	338045	438928	215164	354072	68166
Track_511	21	1	1	0	0	0	22344	36176	58520	1838	511	511	58637	82446	0	0.189	0.476	0.035	0.167	0.125	434411	1113579	206895	364533	220148
Track_512	20	2	1	0	0	0	22344	36176	58520	1870	512	512	90373	52882	0	0.442	1249	0.011	0.241	0.407	332628	603378	201065	339032	103562
Track_513	17	3	2	0	0	0	22344	36176	58520	2388	513	513	56645	82408	0	0.398	1355	0.038	0.199	0.454	287196	452125	200004	268936	60194
Track_515	20	1	1	0	0	0	21280	37240	58520	1669	515	515	30566	62768	0	0.204	0.674	0.03	0.142	0.169	315576	481418	208663	290303	83570
Track_516	15	1	1	0	0	0	15960	37240	53200	1881	516	516	36076	70338	0	0.208	0.459	0.049	0.193	0.099	323937	405619	209539	323285	55967
Track_517	18	1	1	0	0	0	19152	39368	58520	1824	517	517	40654	74652	0	0.282	1011	0.055	0.142	0.341	298954	450473	209596	300329	59229
Track_518	11	1	1	0	0	0	11704	38304	50008	1937	518	518	26451	34107	0	0.387	1292	0.018	0.232	0.433	275781	352309	206056	267292	46343
Track_519	10	1	1	0	0	0	10640	39368	50008	2518	519	519	29639	26472	0	0.401	1181	0.079	0.231	0.406	246145	312632	202367	247904	31213
Track_520	19	0	0	0	0	0	19152	39368	58520	1860	520	520	39232	73323	0	0.245	0.632	0.03	0.237	0.139	405686	623606	220916	387826	105191
Track_524	13	2	2	0	0	0	17024	39368	56392	1775	524	524	26241	32962	0	0.27	0.631	0.013	0.285	0.195	290296	420348	232233	266894	60571
Track_526	17	2	1	0	0	0	19152	39368	58520	1631	526	526	52410	79803	0	0.28	1022	0.049	0.231	0.269	285849	480475	223699	270392	63120
Track_532	12	1	1	0	0	0	12768	38304	51072	1057	532	532	65677	82754	0	0.312	0.992	0.082	0.203	0.292	318595	457263	203914	294339	81371
Track_534	17	1	2	0	0	0	19152	39368	58520	1081	534	534	85037	67972	0	0.297	1260	0.041	0.136	0.332	345587	519284	240104	346734	79370
Track_541	18	0	0	0	0	0	18088	40432	58520	0.358	541	541	33390	62151	0	0.246	0.724	0.025	0.159	0.218	386570	678835	227216	388024	114010
Track_542	15	2	2	0	0	0	18088	40432	58520	0.665	542	542	79599	74034	0	0.206	0.651	0.034	0.181	0.167	327831	622819	211278	269596	125419
Track_543	16	1	2	0	0	0	18088	40432	58520	1610	543	543	27959	44667	0	0.277	1205	0.039	0.131	0.341	289969	503104	203520	251682	78684
Track_544	16	2	1	0	0	0	18088	40432	58520	0.139	544	544	42958	76826	0	0.207	0.433	0.102	0.199	0.09	332999	485566	200743	348426	97243
Track_550	16	1	1	0	0	0	17024	41496	58520	0.984	550	550	49466	77981	0	0.375	0.81	0.086	0.284	0.221	336440	544343	203417	352052	100845
Track_552	17	0	0	0	0	0	17024	41496	58520	2257	552	552	88980	55815	0	0.208	1194	0.003	0.152	0.271	500507	735487	230344	464449	142086
Track_555	14	0	0	0	0	0	13832	42560	56392	2126	555	555	47868	80667	0	0.301	1232	0.019	0.199	0.325	398730	651382	214882	435632	141878
Track_556	15	0	0	0	0	0	14896	42560	57456	0.216	556	556	25719	42939	0	0.199	0.475	0.04	0.217	0.126	363512	519761	220726	375145	74823
Track_557	13	2	2	0	0	0	15960	42560	58520	3990	557	557	28437	52124	0	0.281	0.607	0.087	0.218	0.173	291438	392785	210202	288708	55931
Track_559	13	1	1	0	0	0	13832	42560	56392	1729	559	559	27004	49016	0	0.267	0.537	0.061	0.288	0.149	347590	487022	237206	347665	77461
Track_562	16	0	0	0	0	0	15960	42560	58520	0.046	562	562	83488	70241	0	0.373	0.968	0.046	0.295	0.303	318486	460009	216862	327265	67895
Track_566	10	1	1	0	0	0	10640	42560	53200	0.285	566	566	28562	28713	0	0.277	0.772	0.018	0.131	0.261	270078	414578	204609	256751	60440
Track_567	12	2	2	0	0	0	14896	43624	58520	1081	567	567	87168	64057	0	0.246	0.734	0.023	0.153	0.215	363865	578376	263281	334579	103196
Track_568	11	0	0	0	0	0	10640	43624	54264	1633	568	568	34599	63364	0	0.277	0.466	0.101	0.243	0.125	308512	429961	205105	302549	63715
Track_570	13	2	1	0	0	0	14896	43624	58520	0.879	570	570	77839	78432	0	0.384	1266	0.016	0.247	0.397	299689	502249	202670	253680	92379
Track_571	14	1	1	0	0	0	14896	43624	58520	0.962	571	571	55068	82837	0	0.235	0.603	0.029	0.189	0.17	311257	487461	202728	304527	73664
Track_573	14	0	0	0	0	0	13832	44688	58520	1296	573	573	27318	39697	0	0.411	0.849	0.038	0.351	0.28	275280	410125	203354	263200	56707
Track_574	13	1	1	0	0	0	13832	44688	58520	1635	574	574	26311	39800	0	0.308	1183	0.036	0.246	0.319	255711	353432	200704	243015	45830
Track_578	12	1	1	0	0	0	12768	44688	57456	2126	578	578	94313	54791	0	0.291	0.834	0.068	0.193	0.247	364523	804110	217572	303474	168761
Track_580	14	0	0	0	0	0	13832	44688	58520	1880	580	580	29675	53799	0	0.267	0.983	0.045	0.172	0.245	283222	397666	202225	272065	65387
Track_582	13	1	1	0	0	0	13832	44688	58520	3088	582	582	35002	65526	0	0.353	0.79	0.131	0.353	0.198	305861	446468	211949	326561	68994
Track_583	13	1	1	0	0	0	13832	44688	58520	1907	583	583	39787	12961	0	0.264	1087	0.056	0.21	0.299	288628	418287	200344	275689	62657
Track_584	12	0	0	0	0	0	11704	46816	58520	0.279	584	584	31966	64250	0	0.186	0.501	0.076	0.134	0.12	366313	524593	274526	358504	73599
Track_585	12	0	0	0	0	0	11704	46816	58520	1917	585	585	86689	65509	0	0.432	1094	0.123	0.286	0.337	447306	702709	222502	475787	138203
Track_587	11	1	1	0	0	0	11704	46816	58520	0.935	587	587	40083	74258	0	0.268	1052	0.044	0.195	0.289	360669	611812	202651	356310	113740
Track_588	12	1	1	0	0	0	12768	45752	58520	1375	588	588	79745	76758	0	0.412	1007	0.066	0.305	0.372	375762	563963	209978	350412	131014
Track_590	13	0	0	0	0	0	12768	45752	58520	0.756	590	590	81973	74671	0	0.214	0.593	0.055	0.159	0.166	593310	901079	285231	599814	175206
Track_592	12	0	0	0	0	0	11704	46816	58520	1464	592	592	73693	79007	0	0.443	1150	0.034	0.191	0.418	255787	373176	202895	241820	56031
Track_594	12	1	1	0	0	0	12768	45752	58520	0.101	594	594	78157	77254	0	0.242	1169	0.048	0.152	0.323	249508	330641	204031	250525	41254
Track_596	13	0	0	0	0	0	12768	45752	58520	1847	596	596	49759	80935	0	0.188	0.66	0.013	0.177	0.167	404563	599350	209892	418447	124129
Track_598	13	0	0	0	0	0	12768	45752	58520	1802	598	598	63335	82909	0	0.243	0.724	0.037	0.128	0.269	308212	438011	214031	291878	71090
Track_604	10	2	1	0	0	0	11704	46816	58520	1295	604	604	65217	82675	0	0.207	0.972	0.037	0.129	0.291	256376	351853	206341	242839	46788
Track_605	12	0	0	0	0	0	11704	46816	58520	0.692	605	605	61351	83359	0	0.158	0.265	0.055	0.144	0.062	333436	434471	200755	353327	62480
Track_608	12	1	1	0	0	0	12768	45752	58520	2462	608	608	88770	62427	0	0.231	1132	0.019	0.134	0.314	448768	668459	219937	470519	139663
Track_609	12	1	1	0	0	0	12768	45752	58520	0.864	609	609	90318	60074	0	0.149	0.623	0.013	0.087	0.176	356614	526150	220025	361278	92895
Track_612	11	0	0	0	0	0	10640	47880	58520	1236	612	612	89752	53509	0	0.264	0.814	0.054	0.216	0.22	369507	616603	242289	336208	103221
Track_613	11	0	0	0	0	0	10640	47880	58520	0.317	613	613	57300	82278	0	0.252	0.865	0.042	0.172	0.24	286645	448923	201356	272230	81160

## Sheet: Auxin L1 animal 2
																Mean speed										Average
Track_1	17	1	1	0	0	0	18088	0	18088	0.812	1	1	59756	46562	0	0.311	0.737	0.068	0.294	0.194	363761	584616	205240	328889	116936	0.293622
Track_2	12	0	0	0	0	0	11704	0	11704	1299	2	2	59258	48281	0	0.169	0.272	0.036	0.184	0.075	437965	630773	296529	431542	94723
Track_5	24	0	0	0	0	0	24472	0	24472	3310	5	5	56361	45398	0	0.293	1021	0.022	0.238	0.236	436629	772157	204799	406224	136815
Track_6	15	0	0	0	0	0	14896	0	14896	0.219	6	6	53432	45641	0	0.173	0.282	0.041	0.176	0.09	450697	644911	235259	471032	103136
Track_7	40	3	2	0	0	0	45752	0	45752	1916	7	7	63320	52082	0	0.327	1088	0.026	0.266	0.256	467202	882240	212808	453221	165432
Track_8	23	1	2	0	0	0	25536	0	25536	0.584	8	8	71496	53006	0	0.251	1007	0.058	0.193	0.226	364855	668893	200772	313963	127251
Track_10	12	2	1	0	0	0	13832	0	13832	1730	10	10	72158	53721	0	0.306	1104	0.062	0.196	0.307	386328	677945	227021	381482	140563
Track_12	56	4	2	0	0	0	63840	0	63840	2829	12	12	73320	54739	0	0.254	1036	0.016	0.192	0.224	399048	1005412	204306	367645	164706
Track_13	29	2	2	0	0	0	32984	0	32984	3387	13	13	71272	55980	0	0.345	1046	0.04	0.239	0.287	360495	620302	205768	347733	110026
Track_14	16	0	0	0	0	0	15960	0	15960	0.314	14	14	73416	54856	0	0.232	0.604	0.044	0.212	0.148	312686	443113	209035	319698	63740
Track_15	56	0	0	0	0	0	58520	1064	59584	2978	15	15	64868	51271	0	0.261	0.989	0.02	0.179	0.234	350235	811899	202377	324664	132772
Track_16	24	1	2	0	0	0	26600	0	26600	1031	16	16	65078	51596	0	0.255	1090	0.032	0.211	0.246	357325	645363	238522	356004	96555
Track_17	55	4	2	0	0	0	63840	0	63840	2425	17	17	70163	51991	0	0.278	0.871	0.009	0.223	0.216	358041	723477	201343	352078	111437
Track_18	61	0	0	0	0	0	63840	0	63840	1929	18	18	66737	51236	0	0.293	1171	0.017	0.214	0.25	394353	967645	201714	385706	132348
Track_19	15	0	0	0	0	0	14896	0	14896	0.923	19	19	63388	51282	0	0.18	0.373	0.042	0.149	0.11	446154	882087	223342	383321	173976
Track_20	16	2	2	0	0	0	19152	0	19152	1451	20	20	71065	52327	0	0.272	0.585	0.076	0.272	0.138	389341	569647	246252	384852	101777
Track_23	44	2	1	0	0	0	47880	0	47880	0.405	23	23	74479	57412	0	0.215	0.78	0.018	0.167	0.173	499199	764860	223309	497321	144287
Track_25	11	0	0	0	0	0	10640	0	10640	1265	25	25	73207	57198	0	0.277	1293	0.058	0.164	0.372	339789	437274	267271	340512	54905
Track_26	30	1	1	0	0	0	31920	0	31920	0.683	26	26	71878	58164	0	0.198	0.477	0.039	0.199	0.123	412205	739791	223273	400541	124397
Track_27	55	3	2	0	0	0	63840	0	63840	5458	27	27	72910	58194	0	0.273	1349	0.046	0.201	0.263	384087	988427	209000	360126	149897
Track_28	37	2	1	0	0	0	40432	1064	41496	2620	28	28	72085	56116	0	0.404	1333	0.04	0.238	0.365	351608	676865	213851	346070	102910
Track_30	10	1	1	0	0	0	10640	0	10640	3567	30	30	69084	54030	0	0.581	1359	0.022	0.598	0.551	305025	373076	205112	334045	52845
Track_31	36	1	2	0	0	0	39368	0	39368	1733	31	31	69725	55714	0	0.21	1112	0.031	0.167	0.195	468341	995483	203600	439038	200773
Track_33	14	0	0	0	0	0	13832	0	13832	1849	33	33	74567	56740	0	0.265	1387	0.061	0.176	0.346	409626	807989	221524	388752	159636
Track_34	24	0	0	0	0	0	24472	0	24472	2040	34	34	77856	66550	0	0.286	0.976	0.041	0.158	0.283	387045	660772	206253	395692	121949
Track_36	60	1	1	0	0	0	63840	0	63840	1647	36	36	78228	67303	0	0.316	1153	0.01	0.25	0.261	335617	516401	204182	334974	80534
Track_38	29	3	2	0	0	0	35112	0	35112	2583	38	38	74535	59944	0	0.21	0.576	0.018	0.171	0.16	392001	874668	200740	313410	186152
Track_42	9	1	2	0	0	0	10640	0	10640	1831	42	42	79789	64517	0	0.318	0.933	0.048	0.259	0.279	305578	582496	207057	255389	113105
Track_43	18	2	2	0	0	0	21280	0	21280	3647	43	43	80290	65737	0	0.268	1131	0.024	0.182	0.294	381830	654059	200114	392954	120475
Track_46	24	5	2	0	0	0	30856	0	30856	1346	46	46	84349	72770	0	0.24	1053	0.018	0.167	0.231	288321	446432	205618	263482	66307
Track_48	42	5	2	0	0	0	51072	0	51072	1468	48	48	81421	73537	0	0.282	1310	0.008	0.207	0.265	292316	488819	202678	284789	71384
Track_49	13	1	1	0	0	0	13832	0	13832	0.326	49	49	35018	28817	0	0.254	1214	0.07	0.163	0.314	442822	745764	223173	443818	129602
Track_51	23	3	2	0	0	0	27664	0	27664	0.957	51	51	35311	30140	0	0.311	1279	0.021	0.189	0.323	313063	545178	200560	292887	82313
Track_52	9	1	2	0	0	0	10640	0	10640	0.267	52	52	81729	74111	0	0.361	0.632	0.046	0.395	0.188	356152	556454	213589	305917	134272
Track_53	40	0	0	0	0	0	41496	0	41496	2741	53	53	84178	73411	0	0.327	1392	0.051	0.22	0.322	319882	589063	217240	303592	85894
Track_54	14	0	0	0	0	0	13832	0	13832	1432	54	54	34149	28499	0	0.15	0.355	0.052	0.14	0.095	488793	747251	223974	550205	159222
Track_55	26	1	2	0	0	0	28728	0	28728	1171	55	55	32058	29428	0	0.22	1234	0.024	0.161	0.271	393506	813670	210423	351572	157339
Track_56	10	1	2	0	0	0	11704	0	11704	1006	56	56	87488	74705	0	0.192	0.789	0.043	0.11	0.229	267936	318673	202676	277874	37992
Track_65	53	3	1	0	0	0	58520	0	58520	3272	65	65	79532	69311	0	0.27	1146	0.018	0.18	0.266	354722	692385	205921	333591	113255
Track_66	22	1	1	0	0	0	23408	0	23408	3714	66	66	82999	69607	0	0.381	1162	0.046	0.271	0.277	306299	489900	209018	316006	77260
Track_68	36	2	2	0	0	0	40432	0	40432	4420	68	68	81540	70065	0	0.459	1332	0.026	0.305	0.363	304371	545709	202933	296772	79988
Track_69	22	4	2	0	0	0	27664	0	27664	0.429	69	69	32867	27321	0	0.258	1068	0.022	0.13	0.301	318659	633575	209019	276266	107248
Track_70	28	1	2	0	0	0	30856	0	30856	1932	70	70	83074	70349	0	0.266	0.675	0.036	0.224	0.164	378927	713291	210323	369032	114509
Track_71	24	2	2	0	0	0	28728	0	28728	1269	71	71	84483	73479	0	0.362	1222	0.01	0.216	0.375	276199	387018	200343	278086	53139
Track_73	15	0	0	0	0	0	14896	0	14896	0.304	73	73	85540	71524	0	0.402	0.889	0.059	0.488	0.262	315575	470771	207538	298547	83311
Track_75	21	2	2	0	0	0	24472	1064	25536	2548	75	75	87593	82482	0	0.293	1328	0.053	0.225	0.339	325524	534739	215790	307245	83854
Track_78	29	4	2	0	0	0	35112	0	35112	2639	78	78	40795	36521	0	0.322	1303	0.025	0.207	0.336	373860	728181	200460	356375	141693
Track_79	24	0	0	0	0	0	24472	0	24472	2032	79	79	91032	86870	0	0.303	1368	0.049	0.141	0.364	322909	600362	200470	305663	105870
Track_80	21	1	1	0	0	0	22344	0	22344	0.321	80	80	37799	36453	0	0.213	0.595	0.031	0.199	0.15	556708	919854	368858	493109	164053
Track_81	11	1	1	0	0	0	11704	1064	12768	2324	81	81	89368	87096	0	0.386	1342	0.039	0.209	0.443	278036	414733	204803	238321	66361
Track_83	10	1	2	0	0	0	11704	0	11704	1765	83	83	91090	89297	0	0.388	0.917	0.171	0.253	0.281	310207	531648	200318	320728	104012
Track_84	21	3	2	0	0	0	25536	0	25536	2728	84	84	87343	79104	0	0.371	1220	0.057	0.275	0.325	273928	412392	201547	265831	64964
Track_86	37	1	1	0	0	0	39368	0	39368	1318	86	86	34511	32849	0	0.293	1202	0.028	0.171	0.309	387742	593237	234826	378131	96460
Track_88	35	3	1	0	0	0	39368	1064	40432	0.226	88	88	38337	32251	0	0.235	0.812	0.022	0.141	0.212	419844	785586	206246	405846	155681
Track_89	53	6	2	0	0	0	62776	1064	63840	2464	89	89	89392	77855	0	0.365	1300	0.017	0.282	0.328	298106	492046	202692	263893	77201
Track_92	14	1	1	0	0	0	14896	0	14896	1933	92	92	35098	33041	0	0.309	0.789	0.039	0.287	0.21	353884	497846	227134	352347	85115
Track_93	21	0	0	0	0	0	21280	0	21280	0.31	93	93	84277	77892	0	0.314	0.922	0.054	0.269	0.26	351883	551254	205110	331469	105860
Track_94	9	2	1	0	0	0	10640	0	10640	0.885	94	94	88909	79355	0	0.29	0.889	0.071	0.238	0.259	257264	355031	206520	224775	54494
Track_95	37	2	1	0	0	0	40432	0	40432	1189	95	95	37646	33838	0	0.32	1103	0.015	0.239	0.293	371021	796894	203817	341857	140728
Track_96	20	1	2	0	0	0	22344	0	22344	1521	96	96	86046	80767	0	0.351	0.902	0.026	0.226	0.278	272472	427668	200556	245956	64033
Track_97	15	0	0	0	0	0	14896	0	14896	1891	97	97	86920	81583	0	0.323	0.926	0.025	0.202	0.301	346554	576473	248201	326153	98948
Track_98	45	3	2	0	0	0	52136	0	52136	3214	98	98	88888	80589	0	0.284	1054	0.014	0.19	0.255	295835	517492	202560	270943	78097
Track_102	15	0	0	0	0	0	14896	0	14896	0.679	102	102	47580	39495	0	0.274	0.768	0.036	0.17	0.253	375749	481951	246671	375362	68147
Track_103	15	1	2	0	0	0	17024	0	17024	1843	103	103	92235	94615	0	0.334	0.973	0.083	0.228	0.273	317452	434361	202469	336076	80431
Track_104	32	1	1	0	0	0	34048	0	34048	2756	104	104	40700	37205	0	0.222	0.789	0.071	0.194	0.152	409269	683115	221264	402056	118210
Track_105	34	2	1	0	0	0	37240	0	37240	0.413	105	105	49232	39474	0	0.329	0.975	0.026	0.276	0.241	364550	729275	202270	353704	137781
Track_106	32	2	2	0	0	0	36176	0	36176	1145	106	106	92649	95483	0	0.198	0.747	0.037	0.11	0.182	318256	596620	200926	297864	86442
Track_107	53	1	1	0	0	0	56392	0	56392	3980	107	107	47674	40398	0	0.212	0.733	0.004	0.151	0.177	476549	1063130	200383	444744	201531
Track_110	39	0	0	0	0	0	40432	0	40432	2317	110	110	46720	41052	0	0.232	0.846	0.031	0.166	0.203	572687	1080173	254573	523702	194967
Track_112	17	3	1	0	0	0	20216	0	20216	2877	112	112	91642	96268	0	0.277	0.604	0.027	0.264	0.18	297681	469935	204611	281557	77376
Track_113	12	0	0	0	0	0	11704	0	11704	0.127	113	113	42539	39862	0	0.184	0.878	0.051	0.089	0.245	349411	530139	208674	337426	96270
Track_118	41	0	0	0	0	0	42560	0	42560	1296	118	118	51545	40304	0	0.23	1275	0.037	0.141	0.254	363829	651442	211707	344060	101581
Track_119	38	2	1	0	0	0	41496	0	41496	0.823	119	119	92854	97703	0	0.362	1208	0.052	0.228	0.317	316774	572514	202827	287108	104592
Track_120	25	1	2	0	0	0	27664	0	27664	2349	120	120	92886	89814	0	0.221	0.944	0.036	0.145	0.232	331205	514687	204641	332016	89092
Track_122	18	1	2	0	0	0	20216	0	20216	0.713	122	122	92946	89724	0	0.354	0.866	0.043	0.279	0.282	298224	434828	204436	298285	71984
Track_123	25	3	1	0	0	0	28728	0	28728	2328	123	123	94178	91416	0	0.344	1042	0.026	0.231	0.311	313344	508482	204483	283217	92970
Track_124	41	0	0	0	0	0	42560	0	42560	1357	124	124	95283	93205	0	0.239	1302	0.023	0.119	0.303	373898	604673	205459	365043	104805
Track_125	12	2	1	0	0	0	13832	0	13832	1725	125	125	43307	37938	0	0.207	0.623	0.013	0.163	0.155	366062	538750	242469	355118	86370
Track_127	15	2	2	0	0	0	18088	0	18088	2263	127	127	91986	91563	0	0.275	0.909	0.029	0.167	0.28	254387	317158	203274	239052	38287
Track_129	14	2	2	0	0	0	17024	0	17024	0.17	129	129	39106	37884	0	0.265	0.695	0.082	0.158	0.23	338419	479496	203902	293615	93262
Track_132	12	1	1	0	0	0	12768	0	12768	1332	132	132	41038	38790	0	0.182	0.353	0.07	0.159	0.097	383136	730966	209153	387086	143660
Track_134	18	2	1	0	0	0	20216	0	20216	2678	134	134	89971	93223	0	0.406	1407	0.067	0.33	0.36	301819	459302	204657	312919	66936
Track_135	16	1	1	0	0	0	17024	1064	18088	2471	135	135	94794	107590	0	0.407	1083	0.061	0.239	0.362	317175	422270	216423	301680	67404
Track_136	38	2	2	0	0	0	42560	0	42560	1493	136	136	93626	106123	0	0.455	1149	0.038	0.442	0.326	272114	460129	200187	259884	62695
Track_138	10	1	1	0	0	0	10640	0	10640	2769	138	138	93481	106627	0	0.339	1237	0.068	0.103	0.458	273874	311803	235730	271450	23844
Track_139	16	0	0	0	0	0	15960	0	15960	2660	139	139	94291	108827	0	0.384	1132	0.051	0.222	0.349	300658	520816	206503	288547	80515
Track_140	14	0	0	0	0	0	13832	0	13832	1837	140	140	51996	42734	0	0.165	0.301	0.027	0.16	0.065	517432	797278	288711	509412	157275
Track_146	60	0	0	0	0	0	62776	0	62776	0.841	146	146	55700	43327	0	0.165	0.55	0.005	0.124	0.13	358157	614852	205680	348096	88094
Track_148	21	2	2	0	0	0	24472	0	24472	1268	148	148	53241	43597	0	0.268	0.763	0.065	0.17	0.23	432947	739896	216639	446960	171714
Track_154	42	1	1	0	0	0	44688	1064	45752	4222	154	154	93424	99256	0	0.394	1151	0.018	0.224	0.36	313280	571349	201614	294906	90637
Track_157	14	0	0	0	0	0	13832	0	13832	1208	157	157	94915	100359	0	0.285	1149	0.081	0.173	0.309	352478	539906	205923	336690	104649
Track_159	17	0	0	0	0	0	17024	0	17024	1131	159	159	94964	103298	0	0.413	1231	0.079	0.308	0.361	274954	405196	201301	264407	59805
Track_160	29	1	1	0	0	0	30856	0	30856	1961	160	160	53497	41171	0	0.318	1013	0.059	0.163	0.31	495554	840766	204529	488903	193256
Track_161	37	1	1	0	0	0	39368	0	39368	1641	161	161	44590	40813	0	0.213	0.91	0.016	0.17	0.171	545942	1052725	205238	540892	217554
Track_164	11	0	0	0	0	0	10640	0	10640	1176	164	164	48671	41496	0	0.194	0.965	0.011	0.103	0.289	550773	835097	210436	594998	173848
Track_165	53	5	2	0	0	0	61712	0	61712	1570	165	165	50642	40293	0	0.231	0.819	0.004	0.191	0.21	333776	644051	207008	312687	103902
Track_166	31	4	2	0	0	0	37240	0	37240	4586	166	166	94055	108274	0	0.308	1026	0.043	0.221	0.257	288679	425108	200502	283710	65659
Track_168	35	1	2	0	0	0	38304	2128	40432	1595	168	168	81253	71251	0	0.413	1328	0.024	0.29	0.341	325780	614851	201165	312921	102573
Track_169	53	4	2	0	0	0	61712	2128	63840	3602	169	169	81206	68990	0	0.356	1044	0.012	0.278	0.297	336839	620586	204024	292602	114237
Track_176	27	3	2	0	0	0	31920	2128	34048	2828	176	176	94376	99293	0	0.377	0.981	0.007	0.275	0.296	321072	477401	204558	323952	74571
Track_179	38	1	1	0	0	0	40432	2128	42560	2376	179	179	54065	43565	0	0.246	1032	0.009	0.181	0.225	394359	679084	203663	424018	129226
Track_180	19	1	2	0	0	0	21280	2128	23408	1618	180	180	70690	52172	0	0.313	0.954	0.067	0.242	0.27	368971	595923	220749	366545	113428
Track_181	12	0	0	0	0	0	11704	2128	13832	0.853	181	181	70443	51758	0	0.266	0.735	0.081	0.225	0.195	453174	751208	231506	453145	137857
Track_182	23	2	1	0	0	0	25536	2128	27664	0.448	182	182	73499	55577	0	0.318	0.971	0.041	0.236	0.27	313529	488466	207452	302647	88446
Track_183	18	0	0	0	0	0	18088	2128	20216	1331	183	183	79835	63831	0	0.188	1095	0.033	0.137	0.242	359516	499014	228442	365182	71893
Track_187	23	1	1	0	0	0	24472	0	24472	0.447	187	187	88499	76670	0	0.299	1292	0.012	0.127	0.343	344096	661660	202520	314225	115755
Track_189	17	1	2	0	0	0	19152	3192	22344	2608	189	189	78645	67731	0	0.278	0.738	0.092	0.199	0.221	289172	461341	202876	268622	84427
Track_190	45	5	2	0	0	0	53200	0	53200	0.588	190	190	84080	70054	0	0.333	1185	0.039	0.22	0.309	305704	466541	201947	319477	68821
Track_191	55	3	1	0	0	0	60648	3192	63840	4025	191	191	32185	29064	0	0.321	1386	0.027	0.188	0.324	406469	930131	200306	355091	172320
Track_196	17	1	1	0	0	0	18088	3192	21280	0.25	196	196	92500	86587	0	0.25	1210	0.026	0.127	0.327	271886	440236	204267	236003	70553
Track_197	33	2	1	0	0	0	36176	3192	39368	4969	197	197	39811	35527	0	0.231	1171	0.017	0.17	0.24	386664	674219	203091	387113	125112
Track_198	29	2	1	0	0	0	31920	0	31920	3799	198	198	38173	35244	0	0.241	1055	0.024	0.176	0.231	519431	1122355	218560	535275	223261
Track_200	11	1	1	0	0	0	11704	3192	14896	1819	200	200	85274	79697	0	0.191	0.36	0.037	0.189	0.092	399268	572159	243750	409546	97679
Track_201	56	2	1	0	0	0	60648	3192	63840	4935	201	201	94494	91664	0	0.327	1119	0.044	0.265	0.252	326433	612553	205788	313891	93024
Track_204	11	1	1	0	0	0	11704	3192	14896	1017	204	204	49090	40312	0	0.227	0.922	0.031	0.149	0.26	282285	414356	200347	279555	59788
Track_205	28	1	1	0	0	0	29792	3192	32984	0.737	205	205	96611	95913	0	0.231	1136	0.009	0.138	0.25	413782	681846	232363	418890	103295
Track_206	17	2	1	0	0	0	19152	0	19152	3206	206	206	96518	97966	0	0.42	1377	0.01	0.249	0.447	385856	793510	205272	325488	166454
Track_208	11	0	0	0	0	0	10640	3192	13832	0.666	208	208	45975	38201	0	0.142	0.237	0.041	0.139	0.067	447935	804278	208043	392449	205530
Track_209	22	1	1	0	0	0	23408	0	23408	1877	209	209	93623	93419	0	0.249	0.696	0.025	0.197	0.184	270722	406117	201794	268584	55226
Track_212	53	3	2	0	0	0	60648	3192	63840	2454	212	212	51747	43145	0	0.229	0.899	0.019	0.166	0.183	410552	876321	205432	375821	157521
Track_213	30	3	1	0	0	0	34048	0	34048	1417	213	213	96812	109371	0	0.242	1299	0.038	0.164	0.263	287211	455029	200105	281234	68527
Track_214	45	6	2	0	0	0	54264	0	54264	1059	214	214	96604	99926	0	0.246	1011	0.004	0.153	0.261	349239	631555	203397	317678	114506
Track_216	14	0	0	0	0	0	13832	3192	17024	1423	216	216	92399	101199	0	0.167	0.289	0.052	0.195	0.082	327987	486025	222626	332559	86288
Track_217	18	2	2	0	0	0	21280	0	21280	2631	217	217	54413	41898	0	0.199	0.483	0.02	0.177	0.136	689615	1268824	233613	654938	313175
Track_218	21	1	1	0	0	0	22344	3192	25536	3830	218	218	95293	100932	0	0.325	0.911	0.046	0.281	0.23	351933	768994	209020	307729	139351
Track_220	16	0	0	0	0	0	15960	3192	19152	2103	220	220	60901	47491	0	0.331	1130	0.035	0.246	0.292	488199	759429	216501	487052	174907
Track_222	52	5	2	0	0	0	60648	3192	63840	5859	222	222	56476	44130	0	0.316	1041	0.012	0.195	0.291	333545	641847	205251	309402	103252
Track_223	12	1	1	0	0	0	12768	0	12768	1500	223	223	62405	51835	0	0.363	0.773	0.171	0.348	0.19	588451	837046	387223	615529	145328
Track_225	12	1	2	0	0	0	13832	3192	17024	2052	225	225	75404	59293	0	0.207	0.469	0.05	0.179	0.143	306773	563787	216971	277910	98196
Track_228	13	1	2	0	0	0	14896	0	14896	1369	228	228	70237	56405	0	0.304	0.941	0.03	0.214	0.296	460329	659159	231013	473399	133069
Track_230	29	3	2	0	0	0	35112	0	35112	2719	230	230	79282	66665	0	0.452	1041	0.045	0.407	0.326	311354	666096	205664	261651	109833
Track_232	10	2	2	0	0	0	12768	0	12768	1142	232	232	88933	87756	0	0.38	0.908	0.13	0.232	0.297	279645	413593	229029	266873	60374
Track_233	18	1	2	0	0	0	20216	0	20216	1904	233	233	92787	93552	0	0.164	0.503	0.016	0.125	0.127	388537	652199	217503	363073	111981
Track_236	11	0	0	0	0	0	10640	4256	14896	2245	236	236	61833	50206	0	0.231	0.337	0.153	0.243	0.071	506810	768293	276477	514637	145034
Track_237	23	1	1	0	0	0	24472	4256	28728	1448	237	237	66738	50718	0	0.434	1365	0.041	0.283	0.38	349192	611214	206126	327153	107268
Track_238	47	1	1	0	0	0	50008	4256	54264	2779	238	238	63944	52394	0	0.282	1157	0.027	0.209	0.247	386752	804635	203792	355122	147746
Track_239	13	2	2	0	0	0	15960	4256	20216	1573	239	239	64957	49334	0	0.307	0.848	0.056	0.259	0.232	287127	511230	203387	251621	88988
Track_240	55	2	1	0	0	0	59584	4256	63840	1795	240	240	67675	52427	0	0.328	1149	0.009	0.192	0.331	385224	837955	200507	332679	165198
Track_241	27	4	2	0	0	0	32984	4256	37240	2125	241	241	76356	59832	0	0.263	1380	0.028	0.177	0.271	318366	455423	210616	304722	64381
Track_242	13	1	2	0	0	0	14896	4256	19152	1175	242	242	76851	66716	0	0.379	1069	0.043	0.131	0.377	437468	802070	226723	403280	152498
Track_245	39	5	2	0	0	0	46816	4256	51072	3261	245	245	43968	38424	0	0.329	1175	0.031	0.18	0.324	289821	565981	201270	271362	77446
Track_246	47	1	1	0	0	0	50008	4256	54264	3051	246	246	49170	42081	0	0.264	1291	0.014	0.149	0.316	547336	1086861	238248	544347	232391
Track_247	48	6	2	0	0	0	58520	4256	62776	1739	247	247	47523	39998	0	0.295	1116	0.028	0.222	0.273	329117	620927	208278	305283	92642
Track_248	10	2	2	0	0	0	13832	4256	18088	1817	248	248	91928	90788	0	0.227	0.627	0.064	0.17	0.181	279673	339059	214838	289525	41837
Track_249	29	2	1	0	0	0	31920	5320	37240	1952	249	249	76432	63969	0	0.173	0.719	0.017	0.144	0.148	359400	600327	216718	358313	100116
Track_252	23	1	2	0	0	0	25536	5320	30856	3116	252	252	33739	31748	0	0.261	1021	0.047	0.137	0.262	403856	764157	233174	386662	127185
Track_254	24	3	1	0	0	0	27664	5320	32984	5111	254	254	87780	83994	0	0.424	1361	0.01	0.155	0.495	257267	378945	203529	252152	45334
Track_255	12	0	0	0	0	0	11704	5320	17024	1650	255	255	90369	83503	0	0.378	0.662	0.053	0.439	0.213	282535	426464	202050	273321	74141
Track_257	20	2	1	0	0	0	22344	5320	27664	4734	257	257	89618	87010	0	0.417	1318	0.051	0.17	0.441	305683	508615	211902	289526	89524
Track_259	12	0	0	0	0	0	11704	5320	17024	2143	259	259	96914	103729	0	0.297	0.895	0.063	0.156	0.282	343940	530425	209077	314824	100690
Track_260	27	0	0	0	0	0	27664	5320	32984	1824	260	260	96670	97742	0	0.201	1264	0.021	0.142	0.256	509393	1006911	205187	495349	170299
Track_262	33	3	2	0	0	0	39368	5320	44688	2552	262	262	71466	55548	0	0.301	1119	0.005	0.238	0.246	356071	710782	203514	306458	146464
Track_263	13	0	0	0	0	0	12768	6384	19152	1819	263	263	95786	99985	0	0.186	0.482	0.028	0.156	0.135	448484	718311	264054	419379	147485
Track_266	27	0	0	0	0	0	27664	6384	34048	1479	266	266	95409	95330	0	0.26	0.857	0.026	0.208	0.241	293292	558755	201080	286237	72296
Track_267	53	2	1	0	0	0	57456	6384	63840	0.611	267	267	96477	95263	0	0.276	1069	0.011	0.193	0.256	390354	727645	202621	379222	106307
Track_269	15	0	0	0	0	0	14896	6384	21280	0.517	269	269	96023	96487	0	0.301	1220	0.044	0.179	0.348	355599	623145	208646	340716	111475
Track_270	13	2	2	0	0	0	15960	7448	23408	2084	270	270	93471	103031	0	0.239	1281	0.039	0.181	0.333	325996	527512	213267	331345	86369
Track_273	10	1	2	0	0	0	11704	6384	18088	0.065	273	273	79398	62852	0	0.147	0.41	0.021	0.102	0.128	385627	580419	202414	408317	108485
Track_275	13	0	0	0	0	0	12768	7448	20216	0.378	275	275	33405	29533	0	0.43	1238	0.026	0.194	0.44	347163	568683	209440	324805	94700
Track_277	12	2	2	0	0	0	14896	6384	21280	1924	277	277	80255	71459	0	0.187	0.396	0.031	0.118	0.128	309595	484845	213398	330739	79657
Track_281	33	0	0	0	0	0	34048	7448	41496	3120	281	281	92901	90470	0	0.337	0.891	0.042	0.253	0.253	286399	494028	202118	249938	78879
Track_282	17	0	0	0	0	0	17024	6384	23408	1710	282	282	89559	89617	0	0.343	1028	0.097	0.227	0.304	326213	566689	229137	294387	95558
Track_284	19	0	0	0	0	0	19152	6384	25536	0.554	284	284	42574	37281	0	0.14	0.34	0.014	0.126	0.084	408035	831823	217792	402354	143397
Track_289	14	1	1	0	0	0	14896	8512	23408	1246	289	289	73601	55161	0	0.244	0.822	0.028	0.168	0.223	312851	514068	211752	302858	73759
Track_291	11	1	1	0	0	0	11704	8512	20216	1542	291	291	78579	65730	0	0.446	1235	0.077	0.412	0.35	277721	367890	203811	247242	53676
Track_294	12	0	0	0	0	0	11704	9576	21280	0.799	294	294	80300	66869	0	0.202	0.418	0.025	0.208	0.121	316016	452333	202928	312004	66002
Track_295	17	0	0	0	0	0	17024	9576	26600	1168	295	295	80972	72707	0	0.307	0.993	0.047	0.184	0.268	376108	575639	248660	383510	90307
Track_297	19	3	2	0	0	0	24472	9576	34048	1926	297	297	40722	38305	0	0.225	0.825	0.081	0.167	0.183	350024	674372	204069	328182	108212
Track_298	51	1	1	0	0	0	54264	9576	63840	2625	298	298	53110	43890	0	0.292	1082	0.032	0.18	0.264	364981	702789	204281	350881	120700
Track_299	26	3	2	0	0	0	30856	9576	40432	2735	299	299	58822	46898	0	0.238	0.877	0.015	0.168	0.218	300893	453256	202228	286833	74762
Track_302	14	0	0	0	0	0	13832	11704	25536	2076	302	302	41343	37191	0	0.187	0.384	0.042	0.164	0.117	426588	650907	306405	422359	94218
Track_303	38	4	1	0	0	0	43624	12768	56392	0.577	303	303	50432	42444	0	0.302	0.842	0.051	0.207	0.252	362519	649450	202404	327188	131891
Track_304	19	0	0	0	0	0	19152	11704	30856	0.954	304	304	92451	96623	0	0.298	0.987	0.073	0.213	0.256	339731	618784	206834	323749	122472
Track_309	20	0	0	0	0	0	20216	12768	32984	2255	309	309	43291	40035	0	0.337	1300	0.01	0.159	0.414	455095	807954	205677	405045	196424
Track_313	14	0	0	0	0	0	13832	11704	25536	1761	313	313	94430	103370	0	0.226	0.564	0.139	0.191	0.115	295872	423574	202897	287271	74023
Track_314	36	2	1	0	0	0	39368	10640	50008	3045	314	314	65390	52310	0	0.334	1035	0.046	0.271	0.239	372286	727910	213465	358081	120144
Track_316	18	1	1	0	0	0	19152	10640	29792	1844	316	316	69282	51436	0	0.302	1053	0.035	0.222	0.288	325754	469949	216291	316780	83090
Track_317	48	1	1	0	0	0	51072	12768	63840	1487	317	317	73890	58352	0	0.188	0.901	0.02	0.169	0.153	521183	960579	231353	487087	187863
Track_319	45	4	2	0	0	0	52136	11704	63840	1379	319	319	67599	54259	0	0.272	1040	0.04	0.168	0.27	377777	739938	214896	327230	130316
Track_321	21	1	2	0	0	0	23408	11704	35112	0.919	321	321	72769	58803	0	0.201	0.799	0.007	0.113	0.249	363848	666437	212377	314092	124859
Track_322	18	1	2	0	0	0	20216	11704	31920	1059	322	322	31724	28071	0	0.469	1189	0.095	0.396	0.365	310377	587832	200769	290700	89025
Track_323	12	0	0	0	0	0	11704	11704	23408	0.977	323	323	33797	28627	0	0.283	0.734	0.082	0.178	0.225	347544	447292	262032	346744	63839
Track_324	11	0	0	0	0	0	10640	11704	22344	0.421	324	324	77147	67071	0	0.273	0.817	0.08	0.184	0.235	343341	623631	202876	324561	116343
Track_325	42	5	1	0	0	0	48944	12768	61712	3023	325	325	38091	35067	0	0.28	1220	0.059	0.247	0.202	422244	790585	204632	384357	158569
Track_328	11	2	1	0	0	0	12768	11704	24472	1574	328	328	76299	58968	0	0.168	0.232	0.038	0.178	0.06	285529	331706	203562	295344	38851
Track_331	9	1	2	0	0	0	10640	10640	21280	0.619	331	331	88117	81103	0	0.131	0.258	0.01	0.138	0.096	326434	539992	218681	264711	112727
Track_332	9	2	1	0	0	0	10640	10640	21280	0.676	332	332	75671	62440	0	0.431	1169	0.078	0.206	0.446	263928	386045	209042	230503	62791
Track_333	34	2	2	0	0	0	38304	10640	48944	0.412	333	333	54280	41647	0	0.22	0.788	0.016	0.141	0.193	378080	607487	224566	362224	107430
Track_339	12	0	0	0	0	0	11704	14896	26600	2488	339	339	55249	45225	0	0.287	0.447	0.107	0.324	0.106	477044	641072	224247	504419	113358
Track_340	17	2	2	0	0	0	20216	14896	35112	1047	340	340	68199	54523	0	0.196	0.76	0.013	0.147	0.186	434582	652625	245881	425648	127660
Track_341	45	1	1	0	0	0	47880	14896	62776	3609	341	341	80266	67880	0	0.337	0.882	0.021	0.25	0.257	305965	552083	201890	282202	91879
Track_342	16	1	1	0	0	0	17024	14896	31920	1763	342	342	80154	68699	0	0.332	0.853	0.063	0.263	0.23	317991	592852	206823	288836	94034
Track_344	14	0	0	0	0	0	13832	14896	28728	0.88	344	344	75369	63667	0	0.12	0.3	0.018	0.116	0.077	513607	751234	324114	509010	113211
Track_345	21	0	0	0	0	0	21280	14896	36176	1586	345	345	82568	75409	0	0.301	0.87	0.03	0.3	0.219	347952	494331	223354	332150	77765
Track_346	15	2	1	0	0	0	17024	14896	31920	1960	346	346	88945	77108	0	0.277	1055	0.026	0.177	0.315	351835	503917	207434	329330	89880
Track_348	15	1	1	0	0	0	15960	13832	29792	0.45	348	348	91418	85293	0	0.403	1391	0.034	0.323	0.411	252205	361392	204588	234860	50003
Track_350	26	1	2	0	0	0	28728	14896	43624	1383	350	350	39564	36144	0	0.259	1097	0.043	0.213	0.217	556712	850240	239806	599040	200411
Track_353	42	5	1	0	0	0	48944	14896	63840	2716	353	353	85235	78859	0	0.303	1209	0.062	0.224	0.278	287413	496572	203243	265688	69320
Track_357	16	1	2	0	0	0	18088	13832	31920	1082	357	357	38486	35880	0	0.186	1070	0.01	0.091	0.271	505688	1021485	209337	504236	178578
Track_358	11	1	1	0	0	0	11704	15960	27664	0.708	358	358	79994	64160	0	0.355	1272	0.038	0.262	0.365	325830	603634	203463	271220	124079
Track_360	13	1	1	0	0	0	13832	15960	29792	1814	360	360	88772	78836	0	0.33	1063	0.052	0.259	0.272	254524	380939	211126	243777	49282
Track_362	23	0	0	0	0	0	23408	15960	39368	0.331	362	362	91010	89498	0	0.475	1226	0.069	0.446	0.398	287020	470420	203105	273971	69769
Track_363	13	0	0	0	0	0	12768	15960	28728	2039	363	363	91325	90364	0	0.254	0.848	0.038	0.164	0.24	353848	507200	225199	346616	68762
Track_366	14	2	2	0	0	0	17024	15960	32984	3600	366	366	96487	108663	0	0.299	0.939	0.038	0.21	0.26	284963	403281	216588	279426	56569
Track_367	14	0	0	0	0	0	13832	17024	30856	1274	367	367	96127	102917	0	0.37	1053	0.052	0.222	0.333	350399	683204	219024	324967	129914
Track_370	18	2	1	0	0	0	20216	17024	37240	2742	370	370	85759	73291	0	0.324	1390	0.066	0.176	0.381	296377	487355	205425	261520	94576
Track_371	26	1	1	0	0	0	27664	17024	44688	0.888	371	371	91158	88320	0	0.227	0.726	0.022	0.122	0.207	315292	480745	201475	331668	74615
Track_374	15	1	1	0	0	0	15960	17024	32984	2035	374	374	96087	101118	0	0.301	0.789	0.012	0.283	0.205	292900	397593	201971	303411	67687
Track_375	20	1	2	0	0	0	22344	17024	39368	0.834	375	375	90047	92204	0	0.335	1399	0.052	0.202	0.358	352635	614926	204461	354172	106482
Track_376	11	0	0	0	0	0	10640	17024	27664	0.544	376	376	92600	93958	0	0.356	0.917	0.048	0.21	0.303	295123	338774	229160	298779	35781
Track_378	16	2	2	0	0	0	19152	18088	37240	2919	378	378	84780	74154	0	0.332	0.878	0.012	0.207	0.276	282689	434043	203257	279886	65670
Track_379	15	1	2	0	0	0	17024	18088	35112	3089	379	379	90664	90020	0	0.489	1288	0.078	0.495	0.38	284649	409069	207776	258036	67854
Track_383	18	0	0	0	0	0	18088	18088	36176	3047	383	383	68958	51338	0	0.291	0.837	0.07	0.163	0.246	331472	522411	201301	341870	90097
Track_384	14	0	0	0	0	0	13832	18088	31920	2339	384	384	57643	44885	0	0.48	1249	0.171	0.346	0.37	341246	538283	213498	327081	92280
Track_387	26	1	1	0	0	0	27664	18088	45752	1390	387	387	79531	67091	0	0.431	1359	0.03	0.304	0.392	328423	606751	206212	304471	100838
Track_389	17	0	0	0	0	0	17024	18088	35112	2611	389	389	77157	65962	0	0.399	1124	0.02	0.364	0.311	347057	454588	246172	358601	54868
Track_390	32	1	2	0	0	0	35112	19152	54264	2922	390	390	71669	53062	0	0.36	1039	0.045	0.299	0.28	356324	610310	221669	338624	93620
Track_392	21	1	2	0	0	0	23408	19152	42560	1505	392	392	78475	65781	0	0.338	1152	0.04	0.25	0.316	315795	607929	200574	292418	117418
Track_396	12	0	0	0	0	0	11704	19152	30856	0.738	396	396	36726	32732	0	0.117	0.274	0.038	0.086	0.068	321698	468900	238868	303826	64501
Track_397	11	0	0	0	0	0	10640	19152	29792	1094	397	397	29917	28071	0	0.116	0.215	0.012	0.13	0.066	334368	572592	205923	310936	109588
Track_398	37	3	2	0	0	0	42560	19152	61712	1564	398	398	89285	77885	0	0.301	1283	0.023	0.238	0.264	318092	604148	200772	285079	102599
Track_403	19	0	0	0	0	0	19152	20216	39368	0.558	403	403	89313	80710	0	0.369	1114	0.049	0.229	0.307	328030	606599	201203	305280	104590
Track_404	32	1	1	0	0	0	34048	20216	54264	1508	404	404	94604	92084	0	0.204	0.71	0.015	0.143	0.18	400719	687693	232747	384710	114376
Track_406	16	0	0	0	0	0	15960	20216	36176	1360	406	406	92258	96733	0	0.342	0.995	0.033	0.25	0.302	335098	631097	224346	294025	102664
Track_413	38	0	0	0	0	0	39368	20216	59584	2258	413	413	53128	45162	0	0.267	1196	0.022	0.133	0.322	403215	926281	212596	363769	171339
Track_414	10	1	2	0	0	0	11704	20216	31920	0.914	414	414	62596	52110	0	0.256	0.769	0.033	0.122	0.26	316650	463870	201270	332012	98776
Track_415	18	1	1	0	0	0	19152	20216	39368	1821	415	415	79750	64281	0	0.248	0.893	0.02	0.187	0.197	308359	461342	211104	318722	75605
Track_416	31	4	2	0	0	0	39368	21280	60648	2638	416	416	77871	67855	0	0.295	0.998	0.032	0.183	0.255	345989	515544	204194	343047	88548
Track_419	37	3	1	0	0	0	41496	21280	62776	3904	419	419	90176	93346	0	0.239	1188	0.026	0.218	0.208	342655	599491	202532	314791	97563
Track_424	37	2	2	0	0	0	42560	21280	63840	1822	424	424	44729	39577	0	0.274	1115	0.035	0.18	0.266	318328	592784	213705	302328	75904
Track_427	16	0	0	0	0	0	15960	22344	38304	3586	427	427	84720	75245	0	0.393	1395	0.046	0.157	0.447	284658	387189	216360	267206	51260
Track_428	10	1	2	0	0	0	11704	22344	34048	1700	428	428	46356	38635	0	0.187	0.515	0.039	0.173	0.134	356680	501304	233747	388580	101841
Track_429	27	0	0	0	0	0	27664	22344	50008	3371	429	429	91604	90161	0	0.293	1072	0.037	0.229	0.233	345540	676494	205484	295827	126204
Track_432	31	2	2	0	0	0	36176	22344	58520	1876	432	432	73903	56486	0	0.254	0.931	0.024	0.177	0.251	367192	586406	201812	352722	105105
Track_433	40	0	0	0	0	0	41496	22344	63840	1748	433	433	76827	63947	0	0.325	1172	0.007	0.208	0.312	368755	802433	208455	365783	119337
Track_436	11	0	0	0	0	0	10640	23408	34048	0.856	436	436	52903	43583	0	0.296	0.83	0.05	0.17	0.29	391940	613449	202141	400968	133354
Track_437	35	1	1	0	0	0	37240	23408	60648	1665	437	437	72867	54069	0	0.231	0.886	0.01	0.123	0.25	371631	641351	206294	355762	116321
Track_438	13	1	1	0	0	0	13832	23408	37240	1298	438	438	92821	99573	0	0.266	1158	0.018	0.155	0.305	313770	513241	201230	307264	92437
Track_441	20	1	1	0	0	0	21280	23408	44688	2350	441	441	84371	77708	0	0.348	0.948	0.058	0.321	0.234	318312	490878	208728	310112	76057
Track_442	32	5	2	0	0	0	40432	23408	63840	1991	442	442	36562	30339	0	0.279	1345	0.034	0.17	0.286	307697	494043	210206	290877	70727
Track_443	20	2	1	0	0	0	22344	23408	45752	1528	443	443	43742	37611	0	0.296	1091	0.025	0.179	0.314	292751	459931	200145	277270	73685
Track_446	13	1	1	0	0	0	13832	24472	38304	0.606	446	446	74642	57594	0	0.281	0.891	0.047	0.204	0.239	399818	762930	237584	352709	166074
Track_448	12	2	1	0	0	0	13832	24472	38304	2669	448	448	88025	76341	0	0.573	1288	0.035	0.443	0.445	270818	363648	205023	275677	46734
Track_450	10	1	2	0	0	0	11704	24472	36176	0.085	450	450	86922	74100	0	0.227	1057	0.021	0.1	0.322	288431	385449	213898	287816	53786
Track_455	10	2	2	0	0	0	12768	25536	38304	0.256	455	455	87493	83500	0	0.156	0.322	0.019	0.113	0.117	286017	373325	209330	287401	54779
Track_457	27	0	0	0	0	0	27664	25536	53200	3185	457	457	96278	95597	0	0.468	1377	0.04	0.395	0.365	290847	501305	205397	279982	62448
Track_458	11	0	0	0	0	0	10640	25536	36176	2182	458	458	93657	98191	0	0.363	1038	0.111	0.245	0.297	293413	544791	205786	271399	86490
Track_461	10	1	2	0	0	0	11704	25536	37240	1518	461	461	50941	43747	0	0.155	0.201	0.122	0.155	0.03	337203	462238	207974	341047	95076
Track_464	13	0	0	0	0	0	12768	25536	38304	1549	464	464	97361	104567	0	0.186	0.42	0.059	0.141	0.125	283083	431069	213267	257591	61722
Track_466	21	2	1	0	0	0	23408	25536	48944	0.923	466	466	65637	50806	0	0.484	1144	0.091	0.27	0.38	308374	473775	205270	303421	71735
Track_467	37	0	0	0	0	0	38304	25536	63840	0.52	467	467	68619	51420	0	0.314	1170	0.024	0.243	0.271	321665	555827	209370	282011	100293
Track_468	36	1	1	0	0	0	38304	25536	63840	1226	468	468	75048	62191	0	0.272	0.943	0.037	0.168	0.252	321164	513150	202446	313628	73593
Track_470	17	1	1	0	0	0	18088	25536	43624	3058	470	470	78947	65146	0	0.258	0.734	0.052	0.199	0.214	347041	673109	210817	318709	118463
Track_472	12	0	0	0	0	0	11704	25536	37240	1817	472	472	87861	81094	0	0.295	0.821	0.029	0.202	0.268	298176	515650	214279	276331	89073
Track_473	27	2	1	0	0	0	29792	26600	56392	1730	473	473	68962	55283	0	0.303	1010	0.006	0.227	0.272	349046	572160	202360	346869	93045
Track_476	11	1	2	0	0	0	12768	26600	39368	2215	476	476	82739	69977	0	0.482	1214	0.098	0.35	0.4	283018	456653	224983	263833	66758
Track_479	15	1	2	0	0	0	17024	26600	43624	2643	479	479	92586	91090	0	0.449	1392	0.039	0.295	0.459	273334	357392	210333	270330	48315
Track_480	10	2	2	0	0	0	13832	26600	40432	1576	480	480	96753	106467	0	0.364	1122	0.016	0.14	0.411	278461	368325	222447	279053	41527
Track_483	18	0	0	0	0	0	18088	26600	44688	3946	483	483	59697	47813	0	0.305	0.829	0.08	0.256	0.198	468278	855042	204698	478811	162497
Track_484	16	1	1	0	0	0	17024	26600	43624	2707	484	484	60854	49229	0	0.247	0.593	0.048	0.168	0.166	398019	576338	267346	403226	84813
Track_488	29	0	0	0	0	0	29792	27664	57456	1579	488	488	79849	64803	0	0.323	1180	0.042	0.165	0.324	357270	763155	201812	333388	122476
Track_493	15	2	2	0	0	0	18088	28728	46816	0.85	493	493	94362	109152	0	0.281	0.701	0.027	0.218	0.2	264911	441582	202791	249141	63912
Track_498	27	3	2	0	0	0	32984	28728	61712	3726	498	498	72936	55515	0	0.351	1193	0.013	0.278	0.298	277510	466658	201511	265676	63459
Track_499	30	1	1	0	0	0	31920	29792	61712	1191	499	499	65299	53143	0	0.206	0.684	0.021	0.175	0.151	420245	750330	225942	415109	127004
Track_501	30	2	2	0	0	0	34048	29792	63840	4082	501	501	77951	64513	0	0.452	1399	0.037	0.463	0.381	294486	521263	205460	278993	79579
Track_505	25	2	2	0	0	0	28728	29792	58520	2797	505	505	90447	86752	0	0.228	1237	0.031	0.19	0.241	294141	448502	209400	283728	58710
Track_506	25	2	2	0	0	0	29792	29792	59584	3220	506	506	85465	73042	0	0.374	1192	0.048	0.187	0.384	280111	439803	201087	261419	61907
Track_507	17	2	2	0	0	0	20216	29792	50008	2146	507	507	88504	86251	0	0.426	1334	0.031	0.255	0.437	255773	424658	200485	233294	54523
Track_509	26	0	0	0	0	0	26600	30856	57456	5172	509	509	71392	55285	0	0.393	1360	0.037	0.264	0.34	344501	603281	206310	325777	114280
Track_513	24	2	1	0	0	0	26600	30856	57456	3141	513	513	83856	69975	0	0.483	1402	0.028	0.3	0.426	268989	459260	204970	246826	65105
Track_514	11	0	0	0	0	0	10640	30856	41496	1446	514	514	34293	29539	0	0.23	0.719	0.019	0.173	0.222	281234	427982	211399	253655	59965
Track_515	25	3	1	0	0	0	28728	30856	59584	3210	515	515	86745	78614	0	0.219	0.746	0.061	0.172	0.16	299988	442442	224336	295841	52729
Track_518	32	0	0	0	0	0	32984	30856	63840	2649	518	518	37183	35991	0	0.25	1009	0.008	0.187	0.234	324335	638372	203630	321546	102469
Track_520	31	1	1	0	0	0	32984	30856	63840	0.861	520	520	53384	41144	0	0.229	0.787	0.025	0.185	0.209	457497	653206	225503	460773	137534
Track_521	14	0	0	0	0	0	13832	30856	44688	0.715	521	521	96881	97560	0	0.264	0.785	0.04	0.162	0.239	385808	606313	221801	405892	121502
Track_522	25	4	2	0	0	0	32984	30856	63840	3145	522	522	95683	99575	0	0.295	1172	0.037	0.231	0.264	325347	426502	208255	319995	63200
Track_525	17	1	1	0	0	0	18088	31920	50008	1524	525	525	35940	30765	0	0.168	0.489	0.017	0.119	0.148	339339	552417	221802	315285	99396
Track_526	12	0	0	0	0	0	11704	31920	43624	1280	526	526	87384	81555	0	0.204	0.43	0.039	0.201	0.128	292052	344316	216904	318210	41261
Track_530	29	1	2	0	0	0	31920	31920	63840	3092	530	530	94149	92521	0	0.334	0.93	0.044	0.236	0.281	291909	457960	204656	283916	56699
Track_531	29	2	1	0	0	0	31920	31920	63840	2878	531	531	91273	88496	0	0.307	1008	0.064	0.245	0.262	332260	556423	203054	303773	93696
Track_533	27	3	1	0	0	0	30856	31920	62776	3167	533	533	96155	100912	0	0.365	1224	0.026	0.273	0.353	299087	469082	201274	281888	76180
Track_535	14	0	0	0	0	0	13832	31920	45752	1887	535	535	73920	59435	0	0.305	0.808	0.099	0.222	0.244	341574	634493	219602	323808	119541
Track_536	29	0	0	0	0	0	29792	31920	61712	1218	536	536	74527	59938	0	0.234	1008	0.022	0.176	0.241	373052	622538	209579	370473	106747
Track_537	29	1	2	0	0	0	31920	31920	63840	3661	537	537	78409	65513	0	0.404	1131	0.028	0.303	0.345	303354	511026	209502	290341	80421
Track_538	13	0	0	0	0	0	12768	31920	44688	2105	538	538	83589	75971	0	0.483	1224	0.153	0.349	0.356	270272	407793	200555	249726	61558
Track_540	21	1	1	0	0	0	22344	32984	55328	1258	540	540	96226	97845	0	0.337	1311	0.037	0.231	0.378	325328	646769	208414	285617	110459
Track_541	20	1	1	0	0	0	21280	34048	55328	1657	541	541	93961	100128	0	0.205	0.969	0.036	0.152	0.229	327634	547947	201867	300363	96059
Track_542	11	0	0	0	0	0	10640	34048	44688	1542	542	542	93515	90225	0	0.503	1144	0.101	0.637	0.379	268108	514284	204992	229441	83894
Track_543	21	1	2	0	0	0	23408	34048	57456	0.711	543	543	46202	41148	0	0.302	1403	0.067	0.196	0.314	382148	558477	204939	372999	90711
Track_544	10	1	1	0	0	0	10640	32984	43624	1794	544	544	96195	107133	0	0.288	0.882	0.068	0.224	0.234	338283	532004	237495	347990	90042
Track_546	27	0	0	0	0	0	27664	34048	61712	3616	546	546	46270	38982	0	0.3	1301	0.036	0.184	0.331	388104	674669	207256	370110	133967
Track_547	28	1	2	0	0	0	30856	32984	63840	1360	547	547	95851	109196	0	0.27	1105	0.078	0.191	0.28	311487	546791	206321	311881	74762
Track_548	10	1	2	0	0	0	11704	32984	44688	0.612	548	548	66644	53168	0	0.255	0.48	0.1	0.236	0.127	285981	458158	220488	262911	73306
Track_549	28	0	0	0	0	0	28728	32984	61712	5405	549	549	71720	52902	0	0.272	0.956	0.04	0.192	0.248	413359	766168	200525	400591	143072
Track_550	19	1	2	0	0	0	21280	34048	55328	1309	550	550	68650	54925	0	0.372	1163	0.025	0.315	0.3	296219	419889	220492	288147	60519
Track_551	27	2	1	0	0	0	29792	34048	63840	2589	551	551	80591	68326	0	0.285	1225	0.008	0.136	0.342	311522	676773	201570	271355	132111
Track_554	14	2	2	0	0	0	17024	36176	53200	0.687	554	554	96713	103012	0	0.393	0.921	0.043	0.241	0.307	350123	859354	208060	262645	181321
Track_555	15	1	1	0	0	0	15960	35112	51072	2711	555	555	95288	102498	0	0.309	1131	0.11	0.226	0.281	308673	493874	203449	309018	86667
Track_558	19	2	2	0	0	0	23408	35112	58520	1405	558	558	67894	53198	0	0.276	0.994	0.032	0.146	0.288	288156	647492	202356	263394	100493
Track_559	22	2	2	0	0	0	25536	35112	60648	2008	559	559	76566	60009	0	0.22	0.646	0.077	0.143	0.177	313703	472271	213858	293095	74622
Track_560	27	1	1	0	0	0	28728	35112	63840	1961	560	560	75030	58741	0	0.309	1317	0.033	0.186	0.322	378840	629273	202502	340086	123894
Track_562	24	2	2	0	0	0	27664	35112	62776	2285	562	562	82796	75326	0	0.213	0.6	0.009	0.155	0.151	315221	452168	202664	318232	72093
Track_563	28	0	0	0	0	0	28728	35112	63840	0.763	563	563	78721	69362	0	0.342	0.837	0.035	0.274	0.265	326326	533470	204014	311582	90688
Track_567	24	1	2	0	0	0	26600	35112	61712	2240	567	567	84695	76411	0	0.226	0.587	0.044	0.166	0.148	344168	537071	209157	332326	82912
Track_569	13	2	1	0	0	0	14896	35112	50008	1341	569	569	29606	27227	0	0.169	0.421	0.012	0.185	0.114	308581	425126	212672	300558	67585
Track_572	12	1	2	0	0	0	13832	35112	48944	0.679	572	572	89703	88428	0	0.305	0.912	0.032	0.186	0.274	285345	455506	206561	266332	72483
Track_576	13	1	2	0	0	0	14896	37240	52136	1482	576	576	33631	31637	0	0.204	0.352	0.074	0.222	0.08	332826	487048	201118	293049	105636
Track_577	19	3	1	0	0	0	22344	37240	59584	3496	577	577	34234	32989	0	0.281	0.779	0.025	0.186	0.227	281030	447232	206585	269250	67828
Track_579	25	1	1	0	0	0	26600	37240	63840	1903	579	579	93217	98214	0	0.281	1270	0.038	0.156	0.319	422979	732611	216939	382466	156213
Track_581	18	2	1	0	0	0	20216	37240	57456	0.293	581	581	92364	102267	0	0.175	0.522	0.037	0.138	0.127	300101	478946	219295	291495	70393
Track_582	24	0	0	0	0	0	24472	37240	61712	2059	582	582	93643	105815	0	0.486	1318	0.079	0.349	0.364	299207	463784	200683	285016	75447
Track_584	17	0	0	0	0	0	17024	38304	55328	1543	584	584	86267	81393	0	0.417	1358	0.022	0.272	0.453	304253	480487	216607	293504	68902
Track_586	17	2	2	0	0	0	20216	38304	58520	1341	586	586	95771	94419	0	0.192	0.488	0.013	0.214	0.143	253798	397293	201363	234746	50133
Track_588	13	0	0	0	0	0	12768	38304	51072	1082	588	588	96733	97176	0	0.316	1276	0.057	0.093	0.403	385355	699692	206184	410814	159907
Track_589	19	0	0	0	0	0	19152	38304	57456	0.46	589	589	35743	33370	0	0.217	0.965	0.023	0.169	0.208	341235	526630	206863	339020	83130
Track_590	16	2	1	0	0	0	18088	38304	56392	3047	590	590	91217	89645	0	0.34	0.913	0.013	0.207	0.286	275764	413067	202767	247117	68426
Track_591	12	2	2	0	0	0	15960	38304	54264	2715	591	591	48192	39456	0	0.341	1326	0.072	0.24	0.356	282978	473053	209129	254795	77689
Track_593	23	2	1	0	0	0	25536	38304	63840	3563	593	593	55961	44832	0	0.314	0.835	0.029	0.272	0.211	378486	642458	208248	348888	125179
Track_595	18	3	2	0	0	0	23408	38304	61712	1823	595	595	54104	41523	0	0.205	0.49	0.058	0.138	0.132	326431	432251	220210	332898	61291
Track_596	15	2	1	0	0	0	17024	38304	55328	5163	596	596	55115	46142	0	0.326	0.884	0.108	0.227	0.26	471757	780390	290903	419400	135451
Track_597	17	1	2	0	0	0	19152	39368	58520	3787	597	597	43672	40070	0	0.306	1134	0.055	0.231	0.294	326053	540381	209879	295605	102780
Track_599	12	0	0	0	0	0	11704	39368	51072	0.634	599	599	42347	39612	0	0.307	0.806	0.095	0.249	0.203	418930	836635	203413	402996	180318
Track_600	14	0	0	0	0	0	13832	39368	53200	0.419	600	600	54236	46219	0	0.193	0.49	0.088	0.141	0.116	425860	682439	211602	440166	134117
Track_601	14	0	0	0	0	0	13832	39368	53200	0.335	601	601	50243	42257	0	0.228	0.542	0.061	0.23	0.156	484980	786090	251411	506650	153764
Track_606	10	1	1	0	0	0	10640	39368	50008	0.873	606	606	31113	28330	0	0.449	1379	0.079	0.199	0.452	247451	415242	200908	243480	60332
Track_609	22	2	1	0	0	0	24472	39368	63840	1464	609	609	39276	36704	0	0.277	1020	0.01	0.173	0.28	320136	567719	208406	300576	105348
Track_615	12	2	1	0	0	0	13832	40432	54264	2506	615	615	92568	91974	0	0.402	1060	0.006	0.351	0.307	259343	374849	210381	254886	50198
Track_616	21	1	2	0	0	0	23408	40432	63840	0.577	616	616	92799	93238	0	0.34	1279	0.027	0.248	0.323	297276	469839	203829	295515	77408
Track_620	18	0	0	0	0	0	18088	40432	58520	3023	620	620	71630	57195	0	0.244	0.97	0.046	0.172	0.22	356030	596717	208401	352581	111048
Track_624	12	0	0	0	0	0	11704	41496	53200	2314	624	624	91746	96814	0	0.214	0.901	0.023	0.144	0.249	305672	411042	229316	314615	60864
Track_626	18	0	0	0	0	0	18088	41496	59584	0.561	626	626	95367	92895	0	0.159	0.347	0.032	0.147	0.097	410147	592615	235782	423285	88630
Track_628	20	0	0	0	0	0	20216	41496	61712	4195	628	628	58497	45074	0	0.224	0.719	0.042	0.228	0.152	409395	641609	209893	405930	132598
Track_631	11	0	0	0	0	0	10640	44688	55328	1274	631	631	75008	61322	0	0.199	0.526	0.055	0.184	0.138	292243	352634	221853	263440	51906
Track_632	21	0	0	0	0	0	21280	42560	63840	3481	632	632	83510	70716	0	0.279	1172	0.047	0.132	0.333	308680	535108	208026	279106	91940
Track_634	20	0	0	0	0	0	20216	43624	63840	1818	634	634	78147	68470	0	0.258	0.965	0.038	0.149	0.269	353026	563559	220398	353107	89448
Track_636	9	2	2	0	0	0	11704	44688	56392	0.944	636	636	87635	84176	0	0.175	0.427	0.041	0.127	0.151	246373	400828	204008	225196	57502
Track_637	18	1	1	0	0	0	19152	42560	61712	0.259	637	637	38152	31110	0	0.286	1151	0.03	0.171	0.303	342350	492602	232996	354273	62060
Track_638	17	3	1	0	0	0	20216	43624	63840	2712	638	638	36240	34016	0	0.262	0.906	0.015	0.234	0.222	308513	485489	208416	298989	74633
Track_640	10	1	1	0	0	0	10640	43624	54264	1224	640	640	89728	91008	0	0.313	1013	0.109	0.271	0.275	264003	394133	206548	261286	53641
Track_642	20	0	0	0	0	0	20216	43624	63840	1154	642	642	92686	90137	0	0.428	0.994	0.007	0.316	0.304	294180	413395	204540	300217	60593
Track_643	15	4	2	0	0	0	20216	43624	63840	1618	643	643	49192	40519	0	0.516	1152	0.029	0.506	0.387	331211	550153	201439	283008	106205
Track_644	14	1	1	0	0	0	14896	44688	59584	0.972	644	644	91758	98489	0	0.338	1002	0.129	0.198	0.3	279271	406486	202934	269259	69928
Track_647	16	2	2	0	0	0	19152	44688	63840	0.331	647	647	69526	51634	0	0.394	1021	0.043	0.307	0.306	303577	476429	208885	262705	83193
Track_648	20	1	1	0	0	0	21280	42560	63840	1293	648	648	72682	58021	0	0.225	0.625	0.015	0.173	0.174	415443	668782	220997	412736	118076
Track_656	17	1	1	0	0	0	18088	45752	63840	2882	656	656	73122	56823	0	0.216	0.615	0.033	0.22	0.134	413527	581048	202192	407703	93186
Track_657	16	1	1	0	0	0	17024	45752	62776	1522	657	657	83914	72596	0	0.305	1294	0.014	0.133	0.357	299537	479742	206468	262851	85802
Track_660	18	0	0	0	0	0	18088	45752	63840	3455	660	660	95176	109262	0	0.198	0.314	0.083	0.203	0.067	300424	406796	222333	294104	54199
Track_663	17	1	1	0	0	0	18088	45752	63840	2618	663	663	94472	101052	0	0.272	1357	0.062	0.178	0.316	353291	533152	217156	360566	78247
Track_664	18	0	0	0	0	0	18088	45752	63840	1422	664	664	47819	41347	0	0.146	0.311	0.014	0.123	0.092	575605	812140	374432	583908	139450
Track_665	16	1	1	0	0	0	17024	46816	63840	2551	665	665	78907	68255	0	0.379	1052	0.048	0.24	0.337	319815	526742	214037	292153	90816
Track_667	17	0	0	0	0	0	17024	46816	63840	0.493	667	667	80918	73007	0	0.172	0.657	0.015	0.166	0.145	384191	636254	253440	346844	111428
Track_668	16	0	0	0	0	0	15960	46816	62776	1601	668	668	84809	70704	0	0.424	1216	0.037	0.344	0.42	265593	452543	203878	255508	67512
Track_669	15	0	0	0	0	0	14896	46816	61712	0.237	669	669	89197	79853	0	0.41	1326	0.082	0.367	0.34	278272	419621	208413	268207	65261
Track_671	13	2	2	0	0	0	17024	46816	63840	2423	671	671	89678	80374	0	0.497	0.987	0.023	0.545	0.347	251528	323734	214712	226564	36044
Track_672	14	2	1	0	0	0	15960	46816	62776	1465	672	672	96211	96359	0	0.429	1397	0.053	0.272	0.427	299950	678941	206587	294052	114520
Track_674	14	0	0	0	0	0	13832	46816	60648	1364	674	674	95648	99648	0	0.308	1191	0.063	0.173	0.337	272997	421022	201900	260492	67990
Track_677	16	1	1	0	0	0	17024	46816	63840	1543	677	677	64840	51209	0	0.264	0.97	0.021	0.153	0.282	342092	524870	208362	306889	99066
Track_681	15	1	1	0	0	0	15960	47880	63840	0.716	681	681	70705	55049	0	0.15	0.464	0.036	0.112	0.131	317199	510483	205577	297109	98817
Track_685	15	0	0	0	0	0	14896	48944	63840	1309	685	685	92150	96890	0	0.347	1125	0.108	0.193	0.352	367156	602402	210693	332756	111981
Track_686	14	1	1	0	0	0	14896	48944	63840	1467	686	686	40875	38237	0	0.208	0.536	0.024	0.145	0.169	395177	790672	250634	397787	139547
Track_689	15	0	0	0	0	0	14896	48944	63840	1464	689	689	93779	90184	0	0.33	1012	0.071	0.2	0.32	321267	513555	202330	301944	79663
Track_691	15	0	0	0	0	0	14896	48944	63840	1658	691	691	53798	41932	0	0.3	0.892	0.09	0.232	0.247	355834	664483	209960	328120	102492
Track_692	15	0	0	0	0	0	14896	48944	63840	0.702	692	692	92360	100890	0	0.224	0.657	0.073	0.187	0.176	422677	745949	213647	402287	171762
Track_693	13	0	0	0	0	0	12768	48944	61712	2140	693	693	95527	102843	0	0.26	0.859	0.064	0.158	0.252	315787	516333	203973	269587	104950
Track_698	12	1	2	0	0	0	13832	48944	62776	0.648	698	698	84337	75583	0	0.276	0.943	0.118	0.212	0.229	300723	465245	202990	284488	87081
Track_700	13	2	1	0	0	0	14896	48944	63840	0.877	700	700	32544	29159	0	0.327	1312	0.081	0.142	0.449	398505	782566	251511	373879	137295
Track_701	14	1	1	0	0	0	14896	48944	63840	2269	701	701	34259	31153	0	0.29	1084	0.033	0.128	0.335	284665	403637	214354	289481	59643
Track_702	14	0	0	0	0	0	13832	50008	63840	2269	702	702	71337	55033	0	0.415	1269	0.054	0.218	0.378	269677	358746	208946	268062	51429
Track_707	9	2	2	0	0	0	11704	50008	61712	1894	707	707	88348	82596	0	0.271	0.447	0.111	0.249	0.106	254841	309777	204846	252210	30617
Track_708	14	0	0	0	0	0	13832	50008	63840	1850	708	708	49112	39784	0	0.376	1301	0.017	0.218	0.431	279518	420774	211910	262787	54434
Track_711	11	2	1	0	0	0	12768	51072	63840	2529	711	711	77357	65392	0	0.271	1349	0.077	0.128	0.397	315709	546660	214147	287402	98183
Track_714	12	1	1	0	0	0	12768	51072	63840	0.882	714	714	89067	78901	0	0.427	1157	0.017	0.273	0.389	320847	447613	245601	323393	71043
Track_716	11	1	2	0	0	0	12768	51072	63840	0.313	716	716	42924	36996	0	0.289	1103	0.065	0.22	0.297	289339	340335	255957	281548	28780
Track_717	10	2	2	0	0	0	12768	51072	63840	2310	717	717	37992	33717	0	0.309	0.854	0.05	0.254	0.264	347924	462754	241171	338470	82880
Track_718	12	1	1	0	0	0	12768	51072	63840	1167	718	718	92702	95201	0	0.158	0.368	0.042	0.137	0.114	307979	608317	227897	275650	100262
Track_720	12	1	1	0	0	0	12768	51072	63840	0.834	720	720	96561	107331	0	0.415	1204	0.013	0.241	0.409	341889	484304	210622	375703	91080
Track_723	13	0	0	0	0	0	12768	51072	63840	1490	723	723	66978	53618	0	0.179	0.33	0.027	0.18	0.099	313405	528736	204260	284720	94754
Track_724	12	0	0	0	0	0	11704	51072	62776	1256	724	724	70244	51852	0	0.18	0.353	0.033	0.179	0.099	336230	448164	227800	352431	71992
Track_728	11	1	1	0	0	0	11704	52136	63840	1714	728	728	90275	89087	0	0.466	1373	0.061	0.274	0.449	269160	410371	201983	249901	55027
Track_729	10	2	1	0	0	0	11704	52136	63840	0.532	729	729	38555	35610	0	0.297	0.678	0.054	0.212	0.217	259059	386320	209488	244844	52731
Track_730	10	1	1	0	0	0	10640	52136	62776	0.487	730	730	91062	90339	0	0.17	0.483	0.029	0.101	0.151	346903	521410	211731	377082	88091
Track_732	12	0	0	0	0	0	11704	52136	63840	0.322	732	732	46858	39396	0	0.242	0.613	0.02	0.152	0.219	294228	391325	220557	277802	51087
Track_736	10	1	1	0	0	0	10640	53200	63840	0.955	736	736	65874	51212	0	0.546	1395	0.045	0.319	0.527	325559	443498	211838	374059	84904
Track_737	9	1	2	0	0	0	10640	53200	63840	0.274	737	737	79296	69963	0	0.176	0.446	0.012	0.171	0.145	298634	613359	203431	237118	125273

## Sheet: Control animal 1
																Mean speed										Average
Track_0	12	0	0	0	0	0	11704	0	11704	0.704	0	0	64951	53791	0	0.3	0.926	0.037	0.189	0.271	478418	837248	279597	485174	160737	0.284151
Track_5	12	0	0	0	0	0	11704	0	11704	0.416	5	5	64666	54590	0	0.266	0.76	0.056	0.259	0.206	416168	519389	253823	413716	72297
Track_7	11	1	1	0	0	0	11704	0	11704	0.856	7	7	63848	55616	0	0.187	0.418	0.029	0.156	0.152	324026	608839	227616	282434	104605
Track_8	39	3	2	0	0	0	45752	0	45752	4169	8	8	84622	9075	0	0.349	1244	0.03	0.263	0.29	366975	661380	209049	343488	107896
Track_9	43	1	1	0	0	0	45752	0	45752	0.95	9	9	65449	53277	0	0.22	0.77	0.015	0.163	0.195	520255	945630	240222	501388	172828
Track_11	12	0	0	0	0	0	11704	0	11704	0.392	11	11	83180	11846	0	0.399	0.84	0.069	0.249	0.28	408738	821872	208788	383925	147299
Track_12	19	0	0	0	0	0	19152	0	19152	1156	12	12	65665	53016	0	0.181	0.505	0.017	0.157	0.144	433770	905484	204779	357073	193688
Track_13	42	2	1	0	0	0	45752	0	45752	2506	13	13	84641	11964	0	0.247	0.933	0.047	0.201	0.159	349656	617106	208100	324441	107472
Track_15	39	3	2	0	0	0	45752	0	45752	3101	15	15	66945	51766	0	0.205	1183	0.007	0.12	0.256	568899	1086687	225656	546354	232304
Track_16	40	3	2	0	0	0	45752	0	45752	0.624	16	16	82957	14236	0	0.398	1215	0.026	0.301	0.344	377388	670574	212981	354490	112360
Track_17	15	2	1	0	0	0	17024	0	17024	0.749	17	17	84671	12988	0	0.396	0.997	0.109	0.333	0.28	394570	608241	242966	377070	96715
Track_18	40	3	1	0	0	0	44688	0	44688	0.838	18	18	82937	12716	0	0.365	1034	0.056	0.256	0.281	388784	689344	215778	371572	129113
Track_19	12	0	0	0	0	0	11704	0	11704	1597	19	19	80819	22043	0	0.31	1191	0.032	0.206	0.32	411465	893616	225528	431491	181473
Track_21	21	0	0	0	0	0	21280	0	21280	0.177	21	21	80738	21356	0	0.297	0.793	0.023	0.276	0.209	394330	589801	222032	363517	119109
Track_23	41	3	1	0	0	0	45752	0	45752	1331	23	23	80693	23676	0	0.337	1392	0.05	0.226	0.333	377237	746806	205763	344649	143574
Track_25	17	1	1	0	0	0	18088	0	18088	0.484	25	25	80173	24036	0	0.285	0.978	0.081	0.258	0.266	314214	614633	207641	313524	96709
Track_26	43	1	1	0	0	0	45752	0	45752	0.597	26	26	60220	59740	0	0.235	1112	0.017	0.142	0.236	575943	1289103	206603	562638	231713
Track_27	30	0	0	0	0	0	30856	0	30856	2111	27	27	61709	58928	0	0.273	0.923	0.036	0.177	0.245	436050	836804	212405	423773	172824
Track_28	18	0	0	0	0	0	18088	0	18088	1131	28	28	81041	24989	0	0.282	0.868	0.035	0.197	0.265	396916	686995	244858	341284	138532
Track_30	37	2	1	0	0	0	40432	0	40432	2839	30	30	65453	54541	0	0.288	1034	0.067	0.224	0.229	343033	610124	205910	344270	100093
Track_32	29	1	1	0	0	0	30856	0	30856	1207	32	32	82209	21508	0	0.346	1031	0.034	0.181	0.317	345483	577695	225217	323115	97867
Track_34	26	0	0	0	0	0	26600	0	26600	0.77	34	34	81743	20445	0	0.26	0.923	0.038	0.187	0.198	329766	522441	217710	354354	75335
Track_35	20	0	0	0	0	0	20216	0	20216	1071	35	35	63472	57686	0	0.192	1010	0.019	0.1	0.292	508916	1031432	203473	520364	212945
Track_36	28	2	2	0	0	0	31920	0	31920	4791	36	36	61333	59568	0	0.386	1172	0.007	0.304	0.321	386235	827885	209725	349540	166395
Track_37	40	3	1	0	0	0	44688	0	44688	0.226	37	37	61042	61072	0	0.247	1245	0.04	0.173	0.247	399456	769452	232632	376738	137831
Track_38	43	1	1	0	0	0	45752	0	45752	0.939	38	38	79187	29464	0	0.316	1038	0.018	0.221	0.305	351204	654048	226473	337602	101502
Track_40	23	1	1	0	0	0	24472	0	24472	1319	40	40	59047	62093	0	0.259	0.88	0.02	0.152	0.272	399236	635563	219099	398613	103528
Track_42	21	1	1	0	0	0	22344	0	22344	1235	42	42	79289	32140	0	0.387	1363	0.043	0.273	0.341	471176	712160	222315	498207	143816
Track_44	24	0	0	0	0	0	24472	0	24472	0.224	44	44	60962	62375	0	0.327	1045	0.028	0.143	0.312	584888	1112242	236220	570993	245515
Track_45	11	0	0	0	0	0	10640	0	10640	1431	45	45	59105	63011	0	0.272	1072	0.044	0.173	0.333	349705	613568	227138	291697	130831
Track_46	27	0	0	0	0	0	27664	0	27664	1163	46	46	79867	31443	0	0.331	1117	0.011	0.19	0.334	536350	942621	220964	527107	193679
Track_48	14	1	1	0	0	0	14896	0	14896	0.469	48	48	80399	26343	0	0.266	0.748	0.032	0.255	0.205	345826	495477	214498	350330	84762
Track_49	43	1	1	0	0	0	45752	0	45752	0.74	49	49	59409	60606	0	0.195	0.905	0.014	0.148	0.179	647537	1038303	216444	660375	190014
Track_51	20	2	2	0	0	0	23408	0	23408	2836	51	51	60439	62075	0	0.417	1101	0.042	0.245	0.364	386155	678478	216726	364744	140391
Track_52	43	1	1	0	0	0	45752	0	45752	2885	52	52	80311	28697	0	0.323	1330	0.035	0.207	0.316	499512	892336	232415	481581	161573
Track_54	14	1	2	0	0	0	15960	0	15960	0.761	54	54	80425	28623	0	0.255	0.861	0.03	0.128	0.244	311699	632890	201184	273489	117944
Track_55	10	1	1	0	0	0	10640	0	10640	0.569	55	55	58431	61701	0	0.192	0.635	0.019	0.121	0.192	375930	505046	220745	372243	90378
Track_57	12	0	0	0	0	0	11704	0	11704	0.965	57	57	55606	65809	0	0.129	0.389	0.026	0.12	0.099	370503	524423	221604	357624	92360
Track_58	43	1	1	0	0	0	45752	0	45752	1025	58	58	76672	36585	0	0.314	1098	0.015	0.222	0.257	495455	809617	247166	484261	145223
Track_59	43	1	1	0	0	0	45752	0	45752	1040	59	59	55624	66217	0	0.215	0.927	0.011	0.156	0.21	452929	1075049	244783	417509	150546
Track_60	40	3	2	0	0	0	45752	0	45752	1463	60	60	76863	37037	0	0.297	0.939	0.043	0.259	0.235	735172	1491385	299686	639645	326111
Track_61	19	0	0	0	0	0	19152	0	19152	0.909	61	61	57463	66386	0	0.157	0.478	0.017	0.134	0.119	471469	835625	247514	434932	165029
Track_62	34	1	1	0	0	0	36176	0	36176	0.45	62	62	77753	33693	0	0.308	1288	0.014	0.193	0.322	746459	1417583	400674	685501	287104
Track_65	17	0	0	0	0	0	17024	0	17024	0.642	65	65	58432	63469	0	0.391	1176	0.039	0.221	0.354	326777	491644	220133	300278	82071
Track_66	39	1	1	0	0	0	41496	0	41496	3497	66	66	58028	63192	0	0.243	1301	0.02	0.167	0.272	483429	825138	202106	511834	199017
Track_67	15	0	0	0	0	0	14896	0	14896	2689	67	67	77736	33386	0	0.373	1275	0.04	0.342	0.318	388362	1062206	219548	350213	201159
Track_68	12	0	0	0	0	0	11704	0	11704	0.547	68	68	57262	64464	0	0.318	0.757	0.028	0.354	0.272	327307	418085	203872	343297	67598
Track_69	43	1	1	0	0	0	45752	0	45752	0.946	69	69	76689	35541	0	0.292	1144	0.015	0.204	0.273	651408	1479799	225040	589607	287364
Track_70	33	1	1	0	0	0	35112	0	35112	1768	70	70	77741	33670	0	0.235	0.765	0.019	0.215	0.182	673280	1101458	218937	615192	226953
Track_72	39	3	2	0	0	0	45752	0	45752	1843	72	72	78325	34420	0	0.233	0.972	0.041	0.192	0.203	637408	1419423	248513	550634	327074
Track_73	26	3	2	0	0	0	30856	0	30856	0.838	73	73	54560	68498	0	0.381	1308	0.027	0.206	0.364	330813	703267	202152	297758	114300
Track_74	20	0	0	0	0	0	20216	0	20216	0.205	74	74	73627	40881	0	0.166	0.401	0.029	0.131	0.118	763217	1213577	274191	791923	279533
Track_75	12	0	0	0	0	0	11704	0	11704	0.37	75	75	74643	40576	0	0.214	0.646	0.013	0.191	0.206	499556	855079	297121	416987	184223
Track_77	40	2	2	0	0	0	44688	0	44688	1518	77	77	74982	40514	0	0.289	1168	0.035	0.164	0.29	563308	984308	257950	524551	229237
Track_79	43	1	1	0	0	0	45752	0	45752	1057	79	79	54647	67475	0	0.21	1134	0.022	0.121	0.232	552740	1030261	209753	534549	169935
Track_80	19	0	0	0	0	0	19152	0	19152	1444	80	80	75683	38093	0	0.302	0.747	0.04	0.17	0.262	789340	1313454	200050	725847	266116
Track_81	16	1	1	0	0	0	17024	0	17024	0.429	81	81	77027	37634	0	0.405	1110	0.059	0.154	0.389	452896	803953	210494	433782	184852
Track_83	16	0	0	0	0	0	15960	0	15960	0.386	83	83	56426	67599	0	0.392	0.993	0.03	0.226	0.373	289131	439221	202015	291146	69313
Track_84	43	1	1	0	0	0	45752	0	45752	1285	84	84	75383	38645	0	0.208	1092	0.014	0.155	0.221	644887	1064807	228548	600556	211441
Track_86	40	3	2	0	0	0	45752	0	45752	1833	86	86	54037	68081	0	0.264	1024	0.007	0.143	0.262	369047	603604	216573	391229	97482
Track_88	37	4	2	0	0	0	45752	0	45752	2174	88	88	52745	69676	0	0.196	0.867	0.024	0.15	0.183	339317	637630	207466	331840	91560
Track_89	15	1	1	0	0	0	15960	0	15960	0.448	89	89	53974	69059	0	0.292	1191	0.038	0.213	0.319	392087	547752	240831	402880	90962
Track_91	11	0	0	0	0	0	10640	0	10640	1461	91	91	71543	43458	0	0.347	0.981	0.043	0.192	0.382	392389	647572	259837	316499	134009
Track_92	31	4	2	0	0	0	37240	0	37240	1052	92	92	51572	73897	0	0.301	1052	0.027	0.207	0.257	413894	825331	225786	434981	118002
Track_94	30	0	0	0	0	0	30856	0	30856	1374	94	94	50175	75425	0	0.182	0.676	0.005	0.131	0.157	654842	1257495	294973	699989	224105
Track_95	39	4	2	0	0	0	45752	0	45752	2198	95	95	72929	45613	0	0.191	0.833	0.027	0.135	0.177	473617	1024215	238833	439289	169410
Track_97	21	1	2	0	0	0	23408	0	23408	1084	97	97	49175	75156	0	0.16	1213	0.012	0.084	0.258	427862	1307999	202145	280993	340658
Track_98	22	0	0	0	0	0	22344	0	22344	1837	98	98	49445	76273	0	0.187	1202	0.024	0.112	0.255	567725	1067311	200460	596006	211592
Track_99	19	0	0	0	0	0	19152	0	19152	2384	99	99	71051	45353	0	0.282	1051	0.005	0.15	0.334	516127	822007	203779	575347	164607
Track_101	25	0	0	0	0	0	25536	0	25536	1484	101	101	52542	71545	0	0.18	0.826	0.011	0.131	0.207	463447	709677	264363	480917	115091
Track_102	25	1	1	0	0	0	26600	0	26600	1110	102	102	74163	42245	0	0.265	1116	0.037	0.176	0.269	415466	704888	247238	391567	116969
Track_103	13	0	0	0	0	0	12768	0	12768	2679	103	103	73552	42730	0	0.324	0.943	0.021	0.201	0.323	406669	687962	226138	357667	144724
Track_104	43	1	1	0	0	0	45752	0	45752	1165	104	104	50851	72877	0	0.312	1196	0.018	0.146	0.329	445070	896951	215192	430232	183682
Track_105	21	1	2	0	0	0	23408	0	23408	0.603	105	105	72371	42259	0	0.11	0.599	0.014	0.081	0.123	603531	972246	227118	587411	229459
Track_106	41	2	2	0	0	0	45752	0	45752	2437	106	106	74249	43682	0	0.18	0.875	0.017	0.126	0.19	590065	1145626	239686	572083	224827
Track_107	12	0	0	0	0	0	11704	0	11704	0.614	107	107	52230	73404	0	0.096	0.266	0.028	0.079	0.067	555466	841384	237014	557039	163714
Track_108	18	0	0	0	0	0	18088	0	18088	0.948	108	108	73980	43400	0	0.317	1068	0.008	0.128	0.383	654481	1454510	239023	425610	398545
Track_109	37	2	2	0	0	0	41496	0	41496	1692	109	109	50668	74611	0	0.195	0.666	0.025	0.145	0.16	545536	1162370	212489	552090	229390
Track_110	38	4	2	0	0	0	45752	0	45752	1294	110	110	68316	48235	0	0.324	1058	0.029	0.2	0.295	448449	857982	221804	421925	144664
Track_111	23	0	0	0	0	0	23408	0	23408	0.133	111	111	48632	79075	0	0.134	0.446	0.031	0.087	0.107	535425	895132	253038	523090	172325
Track_113	12	0	0	0	0	0	11704	0	11704	0.219	113	113	44799	79708	0	0.285	0.789	0.046	0.167	0.279	383563	637203	211730	373376	132673
Track_114	42	2	1	0	0	0	45752	0	45752	1372	114	114	69090	47522	0	0.281	1253	0.026	0.171	0.29	446082	767337	203043	433456	151993
Track_115	36	1	1	0	0	0	38304	0	38304	2315	115	115	46382	79803	0	0.174	1119	0.003	0.142	0.187	517020	852834	313388	505939	142976
Track_118	27	1	1	0	0	0	28728	0	28728	2000	118	118	85768	1043	0	0.381	1253	0	0.305	0.327	335051	616387	220843	284891	103200
Track_119	40	2	2	0	0	0	44688	0	44688	0.433	119	119	69192	48755	0	0.241	0.942	0.013	0.121	0.261	434264	912681	204359	421971	148391
Track_121	33	1	2	0	0	0	36176	0	36176	1764	121	121	44574	80481	0	0.263	1050	0.018	0.135	0.325	385163	640424	211618	348152	121805
Track_122	25	0	0	0	0	0	25536	0	25536	1381	122	122	46631	80144	0	0.237	1059	0.025	0.124	0.281	420210	924840	201700	388894	178948
Track_124	41	3	1	0	0	0	45752	0	45752	2845	124	124	71181	45950	0	0.275	1209	0.024	0.177	0.299	429249	994804	218093	399921	171060
Track_125	42	2	1	0	0	0	45752	0	45752	1065	125	125	47245	77659	0	0.209	0.814	0.009	0.124	0.226	430309	908253	238380	420796	133660
Track_126	34	1	1	0	0	0	36176	0	36176	2276	126	126	47673	78266	0	0.266	1033	0.019	0.163	0.284	545630	921327	201048	561804	191837
Track_127	17	0	0	0	0	0	17024	0	17024	2592	127	127	46275	79606	0	0.388	1157	0.03	0.361	0.328	377828	716444	210805	341410	140235
Track_128	35	1	2	0	0	0	38304	0	38304	2709	128	128	46677	78844	0	0.286	0.909	0.031	0.184	0.243	402896	761209	202509	368682	150661
Track_129	34	0	0	0	0	0	35112	0	35112	0.656	129	129	72974	45623	0	0.23	1018	0.022	0.131	0.251	541079	1044446	206954	526981	231826
Track_131	21	0	0	0	0	0	21280	0	21280	1962	131	131	70242	46750	0	0.266	1342	0.008	0.154	0.352	460670	920722	226149	395611	200021
Track_132	36	2	2	0	0	0	41496	0	41496	3007	132	132	69652	46795	0	0.216	0.95	0.02	0.128	0.243	458085	997468	202717	423963	192106
Track_133	27	1	1	0	0	0	28728	0	28728	1164	133	133	45469	79419	0	0.3	0.85	0.026	0.162	0.273	366310	573196	202193	365609	103901
Track_134	29	1	2	0	0	0	31920	0	31920	1006	134	134	85659	6751	0	0.375	1126	0.006	0.324	0.288	360856	581144	205253	330378	111449
Track_135	41	1	2	0	0	0	44688	0	44688	1338	135	135	84516	6737	0	0.361	1080	0.033	0.224	0.285	354108	683901	203265	346645	115445
Track_136	21	1	2	0	0	0	23408	0	23408	0.025	136	136	66555	50951	0	0.33	1095	0.038	0.204	0.309	395054	662460	214934	386950	120859
Track_137	13	1	1	0	0	0	13832	0	13832	1139	137	137	67599	51155	0	0.37	1211	0.065	0.12	0.409	339046	744574	211446	269642	160797
Track_138	26	3	2	0	0	0	31920	0	31920	1661	138	138	84376	7980	0	0.336	0.801	0.057	0.334	0.211	368507	553350	215023	370098	93969
Track_139	40	2	2	0	0	0	45752	0	45752	0.528	139	139	83710	9068	0	0.317	1014	0.035	0.242	0.265	482118	1003091	221561	467331	187437
Track_140	42	2	1	0	0	0	45752	0	45752	1932	140	140	83639	10930	0	0.28	0.835	0.022	0.218	0.194	403170	757593	231113	393620	121034
Track_141	39	3	2	0	0	0	44688	0	44688	3242	141	141	84678	7889	0	0.371	1168	0.028	0.308	0.289	393079	642870	226548	376676	102556
Track_142	17	1	2	0	0	0	19152	0	19152	0.464	142	142	83829	9246	0	0.281	0.585	0.083	0.256	0.144	350848	568824	206167	362245	108453
Track_145	32	2	1	0	0	0	35112	0	35112	0.879	145	145	69738	48881	0	0.253	1128	0.014	0.128	0.302	335742	571615	200619	317572	102453
Track_146	42	2	1	0	0	0	45752	0	45752	2391	146	146	86302	1889	0	0.33	0.891	0	0.268	0.212	424966	825978	207450	399596	162281
Track_147	36	1	2	0	0	0	39368	0	39368	0.61	147	147	84991	2737	0	0.416	1322	0.064	0.302	0.305	336867	714693	204089	301300	118771
Track_148	12	0	0	0	0	0	11704	0	11704	1043	148	148	85864	4145	0	0.351	0.797	0.018	0.328	0.224	444298	782481	242306	432411	144461
Track_149	32	1	1	0	0	0	34048	0	34048	1937	149	149	67657	50095	0	0.309	1072	0.012	0.184	0.282	551972	1156491	206004	536236	241621
Track_150	43	1	1	0	0	0	45752	0	45752	3792	150	150	44141	80787	0	0.188	0.77	0.028	0.173	0.16	435734	814970	202991	396789	150439
Track_152	17	0	0	0	0	0	17024	0	17024	0.033	152	152	45215	81341	0	0.401	0.879	0.03	0.54	0.329	275752	359346	208478	275140	46467
Track_153	41	3	1	0	0	0	45752	0	45752	1740	153	153	84893	5497	0	0.357	0.948	0.047	0.253	0.276	346941	650781	204451	326722	107997
Track_155	12	2	2	0	0	0	14896	0	14896	0.182	155	155	83827	6858	0	0.274	0.496	0.048	0.266	0.145	280539	394794	222856	271834	44207
Track_156	11	1	1	0	0	0	11704	0	11704	1037	156	156	84970	5929	0	0.532	0.834	0.193	0.562	0.206	318541	503274	201613	305181	96932
Track_157	11	0	0	0	0	0	10640	0	10640	1101	157	157	68542	49996	0	0.186	0.581	0.024	0.162	0.167	386125	636572	241088	374717	131300
Track_158	15	0	0	0	0	0	14896	1064	15960	1172	158	158	67084	51781	0	0.152	0.699	0.004	0.1	0.176	393304	597789	230203	399542	100932
Track_159	19	1	1	0	0	0	20216	1064	21280	0.353	159	159	64306	56753	0	0.305	0.761	0.079	0.205	0.212	359395	544422	220733	385032	92189
Track_161	41	2	1	0	0	0	44688	1064	45752	2007	161	161	62361	58479	0	0.271	1190	0.022	0.204	0.247	422808	771268	208796	405339	129626
Track_163	18	2	2	0	0	0	22344	1064	23408	1142	163	163	62240	59954	0	0.411	0.881	0.06	0.305	0.322	339426	604037	203507	342375	96818
Track_164	19	0	0	0	0	0	19152	1064	20216	1590	164	164	62955	59116	0	0.22	1319	0.031	0.17	0.296	736172	1151578	286138	755595	233619
Track_165	24	3	2	0	0	0	30856	1064	31920	1694	165	165	56694	64352	0	0.283	1110	0.037	0.193	0.289	294674	452606	200226	300461	70648
Track_167	24	0	0	0	0	0	24472	1064	25536	1576	167	167	57564	64219	0	0.396	1209	0.022	0.24	0.377	396653	962826	242276	334959	178554
Track_168	18	1	1	0	0	0	19152	1064	20216	1769	168	168	58015	64633	0	0.392	1122	0.033	0.171	0.404	343289	660596	204683	287408	122775
Track_169	10	1	1	0	0	0	10640	1064	11704	0.55	169	169	54180	69717	0	0.264	1029	0.055	0.089	0.339	310158	410588	239915	311611	68022
Track_170	16	0	0	0	0	0	15960	1064	17024	2118	170	170	52683	70054	0	0.218	1148	0.017	0.081	0.306	341383	600578	205221	327566	123774
Track_173	30	2	2	0	0	0	35112	1064	36176	0.561	173	173	66412	52048	0	0.244	1014	0.009	0.162	0.23	486418	868778	219029	463948	182468
Track_174	33	0	0	0	0	0	34048	1064	35112	0.856	174	174	67222	49712	0	0.219	0.899	0.012	0.176	0.18	482893	842529	257488	465867	152987
Track_180	11	1	1	0	0	0	11704	2128	13832	1869	180	180	45523	82329	0	0.518	1265	0.044	0.359	0.489	273993	421687	201777	264328	62309
Track_182	20	3	2	0	0	0	24472	3192	27664	0.737	182	182	82041	17302	0	0.331	0.861	0.055	0.198	0.245	290654	443781	205230	270390	66971
Track_184	29	1	2	0	0	0	31920	3192	35112	0.683	184	184	81333	23374	0	0.351	1354	0.04	0.195	0.382	339555	569272	201264	334474	99258
Track_185	36	4	2	0	0	0	43624	2128	45752	1738	185	185	64175	55820	0	0.302	1177	0.031	0.164	0.316	358534	762082	205815	325207	129000
Track_186	39	2	2	0	0	0	43624	2128	45752	1542	186	186	59052	61679	0	0.276	0.992	0.038	0.195	0.27	469185	814271	211617	482204	185383
Track_187	17	0	0	0	0	0	17024	2128	19152	1945	187	187	78285	31755	0	0.328	0.871	0.014	0.248	0.274	364930	738619	202895	338822	131307
Track_188	19	2	2	0	0	0	22344	2128	24472	1646	188	188	76447	38709	0	0.307	1276	0.086	0.179	0.342	528049	1190573	368990	454552	190256
Track_190	19	1	1	0	0	0	20216	2128	22344	0.222	190	190	49691	73190	0	0.372	1394	0.042	0.17	0.43	301137	472379	209943	275368	76057
Track_191	19	1	1	0	0	0	20216	4256	24472	1550	191	191	84590	4650	0	0.427	0.992	0.023	0.32	0.343	323879	501474	206012	263707	102121
Track_192	16	0	0	0	0	0	15960	4256	20216	2089	192	192	61665	59822	0	0.223	0.832	0.055	0.113	0.251	452250	644851	295399	518807	110027
Track_193	39	1	1	0	0	0	41496	4256	45752	2303	193	193	52457	71605	0	0.241	0.921	0.018	0.128	0.257	559265	982023	202263	574631	195330
Track_196	31	0	0	0	0	0	31920	5320	37240	2256	196	196	56780	64115	0	0.246	0.872	0.042	0.189	0.208	432032	696636	202870	440975	150253
Track_197	33	5	2	0	0	0	40432	5320	45752	1744	197	197	84096	10590	0	0.375	1133	0.051	0.265	0.305	338456	526097	200910	297395	90729
Track_198	35	4	1	0	0	0	40432	5320	45752	2581	198	198	57270	66287	0	0.293	1060	0.036	0.168	0.274	314310	477403	209135	322589	75338
Track_200	20	1	1	0	0	0	21280	5320	26600	0.952	200	200	84564	12316	0	0.35	1180	0.072	0.319	0.28	398998	754273	201235	388864	147952
Track_201	17	0	0	0	0	0	17024	5320	22344	0.309	201	201	84279	13711	0	0.327	1032	0.051	0.206	0.291	481317	640778	290488	482124	104041
Track_202	15	1	2	0	0	0	17024	5320	22344	1706	202	202	54075	70076	0	0.143	0.372	0.019	0.119	0.106	355847	627866	207723	367355	107236
Track_203	26	0	0	0	0	0	26600	5320	31920	1175	203	203	82377	19269	0	0.242	1176	0.025	0.145	0.27	365931	528159	222212	364662	74570
Track_204	21	2	2	0	0	0	24472	2128	26600	2829	204	204	75660	41397	0	0.359	1162	0.023	0.173	0.35	493156	845012	222437	434908	203294
Track_205	37	1	2	0	0	0	40432	5320	45752	1271	205	205	74240	41706	0	0.168	0.571	0.022	0.144	0.122	633507	1545899	206785	509441	336038
Track_207	17	1	1	0	0	0	18088	5320	23408	1960	207	207	80208	27318	0	0.283	0.888	0.049	0.216	0.256	443559	889028	213959	482609	159225
Track_209	25	2	1	0	0	0	27664	6384	34048	0.252	209	209	64249	53745	0	0.214	0.855	0.017	0.149	0.202	370459	672225	207088	332136	128802
Track_210	32	0	0	0	0	0	32984	6384	39368	4244	210	210	79723	30619	0	0.291	0.987	0.015	0.195	0.281	452450	903377	203185	457445	169946
Track_212	27	1	2	0	0	0	29792	6384	36176	2617	212	212	85684	4488	0	0.368	1058	0.054	0.361	0.228	315441	512927	216049	287992	80870
Track_214	11	0	0	0	0	0	10640	6384	17024	0.816	214	214	83904	12383	0	0.327	0.659	0.061	0.376	0.192	444973	844886	236523	410374	157612
Track_217	35	2	1	0	0	0	38304	7448	45752	1272	217	217	48716	78127	0	0.204	1246	0.009	0.121	0.267	640382	1020981	244992	684484	194265
Track_219	14	1	1	0	0	0	14896	7448	22344	3003	219	219	82798	17586	0	0.426	1134	0.076	0.394	0.359	311613	458382	217024	313405	69778
Track_224	13	1	2	0	0	0	14896	8512	23408	0.887	224	224	86180	3568	0	0.378	0.752	0.035	0.396	0.197	277639	334640	208911	288649	40046
Track_226	19	1	1	0	0	0	20216	8512	28728	1811	226	226	78785	32811	0	0.372	0.737	0.082	0.389	0.23	503440	909052	212088	515865	198144
Track_227	11	0	0	0	0	0	10640	9576	20216	0.246	227	227	60032	63660	0	0.301	0.933	0.062	0.223	0.32	477146	754693	244005	476210	150016
Track_228	12	0	0	0	0	0	11704	9576	21280	1126	228	228	60775	62232	0	0.196	0.555	0.019	0.144	0.188	451851	653880	269488	468719	132965
Track_229	34	1	1	0	0	0	36176	9576	45752	0.871	229	229	52804	69827	0	0.219	0.865	0.016	0.132	0.22	365845	562988	206518	372627	98617
Track_230	26	0	0	0	0	0	26600	8512	35112	0.323	230	230	51059	73893	0	0.204	0.834	0.01	0.134	0.226	534663	768172	202278	563707	158178
Track_231	34	1	1	0	0	0	36176	9576	45752	0.952	231	231	73229	41180	0	0.237	1284	0.014	0.159	0.289	454420	821300	205566	439476	166279
Track_232	34	1	2	0	0	0	37240	8512	45752	2331	232	232	47397	80181	0	0.193	0.969	0.018	0.122	0.196	479672	798288	241874	468065	172136
Track_235	12	1	1	0	0	0	12768	8512	21280	0.785	235	235	81886	22722	0	0.218	0.814	0.021	0.157	0.229	280465	414517	203593	264954	62670
Track_237	30	2	2	0	0	0	35112	10640	45752	2336	237	237	67390	49401	0	0.321	1276	0.011	0.199	0.329	398880	742098	202196	364466	151657
Track_238	22	3	2	0	0	0	26600	10640	37240	1847	238	238	69398	49324	0	0.211	0.718	0.013	0.125	0.187	328103	579459	200489	317285	101696
Track_239	20	2	2	0	0	0	24472	10640	35112	0.452	239	239	83382	17261	0	0.414	1302	0.016	0.24	0.407	285788	453096	201678	256715	76706
Track_240	19	0	0	0	0	0	19152	11704	30856	1465	240	240	64688	54715	0	0.213	0.616	0.03	0.19	0.164	510711	795686	343392	475424	115711
Track_242	33	1	1	0	0	0	35112	10640	45752	0.813	242	242	82753	16218	0	0.27	1252	0.02	0.2	0.248	411487	717757	217306	394562	110697
Track_244	32	1	1	0	0	0	34048	11704	45752	0.707	244	244	55910	65030	0	0.194	1003	0.011	0.115	0.204	366898	548309	207110	381509	90829
Track_245	17	1	1	0	0	0	18088	11704	29792	1848	245	245	76993	36391	0	0.308	0.59	0.06	0.287	0.2	528159	748811	312169	542773	123648
Track_246	13	1	2	0	0	0	14896	10640	25536	2123	246	246	58152	63421	0	0.249	0.779	0.026	0.176	0.227	385615	577844	218555	405742	99968
Track_248	32	1	1	0	0	0	34048	11704	45752	1439	248	248	77482	34716	0	0.255	0.755	0.01	0.19	0.192	569713	1165442	214353	562007	207386
Track_249	30	3	2	0	0	0	35112	10640	45752	1689	249	249	75435	39367	0	0.269	1217	0.01	0.168	0.266	552558	1279561	203725	537945	233797
Track_250	20	0	0	0	0	0	20216	10640	30856	1330	250	250	51567	70791	0	0.341	1178	0.036	0.214	0.36	354177	524770	237166	368320	85035
Track_252	15	0	0	0	0	0	14896	10640	25536	0.797	252	252	71389	44318	0	0.194	0.916	0.026	0.152	0.223	456050	780046	270992	402780	160654
Track_253	31	2	1	0	0	0	34048	11704	45752	0.658	253	253	73838	44161	0	0.243	1149	0.017	0.131	0.267	508080	1136452	203579	462386	205639
Track_254	31	2	1	0	0	0	34048	11704	45752	2852	254	254	72737	42642	0	0.309	1306	0.036	0.188	0.341	452861	862948	209857	388707	186943
Track_255	26	0	0	0	0	0	26600	10640	37240	2066	255	255	75595	41575	0	0.159	0.546	0.004	0.123	0.126	711976	1062758	314739	769558	205893
Track_256	28	2	2	0	0	0	31920	13832	45752	0.567	256	256	54054	67605	0	0.232	1338	0.01	0.148	0.282	379303	753682	213025	354221	144312
Track_260	20	0	0	0	0	0	20216	13832	34048	2087	260	260	63217	56918	0	0.243	1334	0.003	0.126	0.341	527230	942828	217189	479142	241503
Track_263	25	3	2	0	0	0	31920	13832	45752	2293	263	263	61619	58714	0	0.375	1160	0.024	0.212	0.341	361009	503556	219717	370035	90247
Track_264	27	3	1	0	0	0	30856	14896	45752	1354	264	264	58624	64732	0	0.298	0.832	0.026	0.192	0.26	356579	633733	203146	333559	121272
Track_267	20	0	0	0	0	0	20216	14896	35112	2109	267	267	78601	33110	0	0.329	1003	0.064	0.242	0.259	678553	1108222	242300	686486	230278
Track_270	14	1	2	0	0	0	15960	14896	30856	1245	270	270	53523	72179	0	0.219	0.731	0.015	0.133	0.22	290774	411439	200510	301819	48650
Track_271	29	1	1	0	0	0	30856	14896	45752	1551	271	271	83897	8381	0	0.331	1031	0.013	0.275	0.287	354809	564071	203557	349377	103866
Track_273	20	0	0	0	0	0	20216	14896	35112	0.138	273	273	78962	28260	0	0.176	0.512	0.027	0.128	0.133	475929	706984	291995	478093	121348
Track_275	28	1	1	0	0	0	29792	15960	45752	2169	275	275	77575	36204	0	0.393	1236	0.051	0.325	0.298	461815	888506	209180	483560	168090
Track_276	25	3	2	0	0	0	29792	15960	45752	1589	276	276	54275	70557	0	0.296	1155	0.017	0.174	0.348	310394	575072	201468	285138	111600
Track_277	15	0	0	0	0	0	14896	15960	30856	2303	277	277	57181	65914	0	0.337	0.851	0.037	0.274	0.28	397549	666736	229801	370495	133007
Track_278	28	1	1	0	0	0	29792	15960	45752	1112	278	278	52236	73302	0	0.147	1080	0.036	0.097	0.196	452638	859230	205724	391013	199048
Track_280	27	1	2	0	0	0	29792	15960	45752	0.946	280	280	69741	47352	0	0.304	1246	0.024	0.242	0.259	356050	694022	206749	328822	120270
Track_282	24	3	2	0	0	0	29792	15960	45752	2405	282	282	85559	6821	0	0.347	1164	0.024	0.266	0.257	312529	511292	205247	304558	79721
Track_283	14	0	0	0	0	0	13832	15960	29792	0.202	283	283	45438	82605	0	0.567	1125	0	0.621	0.402	235631	361096	205778	220910	40075
Track_286	27	1	1	0	0	0	28728	17024	45752	1154	286	286	74269	42840	0	0.354	1292	0.044	0.26	0.326	408577	753274	200751	369829	154540
Track_287	14	0	0	0	0	0	13832	17024	30856	0.595	287	287	72131	45159	0	0.142	0.36	0.006	0.08	0.122	457039	748674	209154	506498	165294
Track_288	26	2	1	0	0	0	28728	17024	45752	2018	288	288	72837	44295	0	0.354	1152	0.03	0.295	0.294	473932	1160884	200800	401950	233003
Track_290	12	1	2	0	0	0	13832	17024	30856	1718	290	290	70864	45105	0	0.175	0.347	0.052	0.175	0.08	515112	691294	270217	579921	138871
Track_292	12	0	0	0	0	0	11704	17024	28728	2757	292	292	85028	8959	0	0.506	1014	0.114	0.387	0.321	333040	473396	259451	320932	58020
Track_293	23	3	2	0	0	0	28728	17024	45752	2078	293	293	83691	13599	0	0.547	1364	0.087	0.457	0.39	335207	647310	208693	306441	101627
Track_294	21	1	1	0	0	0	22344	17024	39368	0.998	294	294	82595	15481	0	0.302	0.695	0.08	0.269	0.182	429887	711810	241175	385484	148932
Track_295	10	1	1	0	0	0	10640	18088	28728	1927	295	295	62335	56677	0	0.29	0.545	0.142	0.234	0.132	347258	602343	200045	267539	151812
Track_296	25	2	1	0	0	0	27664	18088	45752	2952	296	296	63523	57796	0	0.281	0.885	0.023	0.178	0.283	546750	870927	200095	538812	182314
Track_297	26	1	1	0	0	0	27664	18088	45752	1168	297	297	74717	39709	0	0.236	0.802	0.045	0.163	0.201	508430	937887	210591	549204	207374
Track_298	19	2	2	0	0	0	22344	18088	40432	1936	298	298	69196	46211	0	0.191	0.531	0.057	0.132	0.146	425953	642174	209367	458471	138754
Track_299	22	2	2	0	0	0	25536	20216	45752	0.855	299	299	43478	81528	0	0.174	0.67	0.009	0.103	0.168	351304	651099	223274	314926	114722
Track_301	24	1	1	0	0	0	25536	20216	45752	1818	301	301	81686	21155	0	0.366	1372	0.059	0.193	0.416	370056	652488	203405	335372	124498
Track_302	22	2	1	0	0	0	24472	20216	44688	2288	302	302	78591	32652	0	0.285	0.944	0.032	0.215	0.267	535750	1226085	200271	433516	273521
Track_305	24	2	1	0	0	0	26600	19152	45752	1490	305	305	58225	62366	0	0.224	0.828	0.033	0.161	0.213	503952	973674	212129	454703	199074
Track_307	24	2	1	0	0	0	26600	19152	45752	1326	307	307	70930	44011	0	0.181	0.888	0.036	0.11	0.231	431039	755588	241446	396224	136037
Track_308	22	2	2	0	0	0	25536	20216	45752	1477	308	308	72050	42990	0	0.23	1012	0.02	0.154	0.271	344726	489904	216913	369865	77149
Track_310	21	2	2	0	0	0	24472	21280	45752	1827	310	310	85421	1323	0	0.259	0.676	0.048	0.27	0.165	427693	826348	211956	353468	186058
Track_311	23	1	1	0	0	0	24472	21280	45752	1398	311	311	45305	81614	0	0.298	0.918	0.05	0.191	0.27	324121	487094	219015	312167	76480
Track_313	18	0	0	0	0	0	18088	21280	39368	0.64	313	313	56191	66932	0	0.292	1085	0.043	0.172	0.301	367336	536675	231259	366075	97522
Track_314	23	1	1	0	0	0	24472	21280	45752	0.532	314	314	55843	68698	0	0.225	0.979	0.005	0.168	0.237	348927	624800	209755	345467	88099
Track_315	14	0	0	0	0	0	13832	21280	35112	0.54	315	315	49021	74535	0	0.242	1050	0.004	0.092	0.346	312022	429543	227617	321465	54115
Track_317	17	1	2	0	0	0	19152	22344	41496	2257	317	317	81905	18840	0	0.299	1082	0.006	0.137	0.316	393850	763493	203293	367707	132243
Track_318	22	1	1	0	0	0	23408	22344	45752	1214	318	318	79887	27923	0	0.249	0.899	0.047	0.212	0.192	469096	714457	246067	471641	140272
Track_319	14	0	0	0	0	0	13832	23408	37240	1397	319	319	70728	45700	0	0.282	0.576	0.032	0.338	0.191	434360	645671	235532	447930	112545
Track_323	21	1	1	0	0	0	22344	23408	45752	1878	323	323	47503	79118	0	0.398	1105	0.031	0.322	0.329	412387	724510	211185	393449	152501
Track_324	20	2	1	0	0	0	22344	23408	45752	0.844	324	324	65845	52405	0	0.382	1010	0.044	0.374	0.293	439074	662936	212781	458618	130677
Track_325	12	0	0	0	0	0	11704	23408	35112	0.926	325	325	80791	26061	0	0.228	0.772	0.078	0.199	0.188	339345	478527	247326	346208	69018
Track_326	20	2	1	0	0	0	22344	23408	45752	1622	326	326	80265	26772	0	0.279	1061	0.037	0.2	0.247	251251	348429	200581	232214	42237
Track_328	15	0	0	0	0	0	14896	23408	38304	0.957	328	328	76457	38087	0	0.244	0.674	0.019	0.177	0.179	594788	895195	227250	579474	186983
Track_329	20	2	1	0	0	0	22344	23408	45752	1181	329	329	75797	37447	0	0.362	1050	0.039	0.222	0.293	499958	902701	259395	464326	169170
Track_330	21	1	1	0	0	0	22344	23408	45752	2294	330	330	74509	40377	0	0.282	1262	0.023	0.16	0.346	627295	1040793	261658	603442	176462
Track_332	15	2	1	0	0	0	17024	24472	41496	0.373	332	332	82921	19988	0	0.209	0.466	0.069	0.158	0.13	385359	610635	203186	366476	120280
Track_335	16	2	2	0	0	0	20216	25536	45752	0.73	335	335	85182	10691	0	0.334	0.94	0.051	0.258	0.267	293668	462209	212053	285849	71107
Track_336	17	2	2	0	0	0	20216	25536	45752	1369	336	336	68054	50090	0	0.196	0.405	0.017	0.169	0.135	407949	663040	217093	409074	146808
Track_340	14	3	2	0	0	0	19152	25536	44688	0.94	340	340	79025	33266	0	0.216	0.449	0.05	0.2	0.139	361280	546394	219211	400772	113328
Track_341	16	0	0	0	0	0	15960	25536	41496	0.777	341	341	75547	41814	0	0.207	0.785	0.058	0.16	0.191	685390	1048699	371143	640052	189132
Track_342	14	0	0	0	0	0	13832	25536	39368	2647	342	342	52893	70366	0	0.436	1273	0.055	0.244	0.469	294702	506236	204362	236802	96864
Track_343	18	1	1	0	0	0	19152	26600	45752	0.869	343	343	44018	80867	0	0.192	0.81	0.024	0.094	0.231	389475	670409	251660	344098	127567
Track_345	14	0	0	0	0	0	13832	27664	41496	1585	345	345	66153	51929	0	0.504	1015	0.062	0.335	0.376	561520	1035435	214502	588969	256044
Track_347	15	0	0	0	0	0	14896	26600	41496	1473	347	347	84736	8637	0	0.29	1100	0.029	0.224	0.271	447756	639020	361308	410762	84626
Track_349	15	0	0	0	0	0	14896	26600	41496	2441	349	349	83015	17679	0	0.383	1206	0.163	0.249	0.3	332864	522943	200358	315890	108471
Track_351	13	0	0	0	0	0	12768	26600	39368	0.922	351	351	84187	14478	0	0.502	1114	0.032	0.598	0.416	352073	698974	220949	275892	156349
Track_353	17	2	1	0	0	0	19152	26600	45752	0.39	353	353	81240	20489	0	0.241	0.735	0.027	0.159	0.22	299276	419866	215808	280104	56309
Track_354	12	0	0	0	0	0	11704	27664	39368	0.947	354	354	78595	29916	0	0.253	0.695	0.085	0.127	0.192	422573	633183	271050	465590	108050
Track_355	18	1	1	0	0	0	19152	26600	45752	0.479	355	355	79438	32654	0	0.297	0.68	0.027	0.261	0.196	700920	1208024	303913	665465	214021
Track_356	18	1	1	0	0	0	19152	26600	45752	1085	356	356	79963	28906	0	0.413	1105	0.043	0.222	0.385	414057	614568	247992	404774	119128
Track_357	15	2	2	0	0	0	18088	27664	45752	3063	357	357	57139	66502	0	0.323	1377	0.038	0.107	0.453	314015	528871	211875	274057	84100
Track_359	11	0	0	0	0	0	10640	26600	37240	1755	359	359	76091	40141	0	0.334	0.703	0.143	0.274	0.191	564904	843155	274261	522957	217524
Track_361	18	1	1	0	0	0	19152	26600	45752	1233	361	361	49897	76223	0	0.155	0.872	0.028	0.083	0.199	738268	1190298	224324	732896	269635
Track_364	13	0	0	0	0	0	12768	28728	41496	0.366	364	364	62124	60646	0	0.262	0.865	0.032	0.185	0.249	322795	496599	201381	321311	74334
Track_368	15	1	1	0	0	0	15960	29792	45752	2562	368	368	60873	58856	0	0.333	0.799	0.066	0.274	0.278	324291	618851	207778	313485	105714
Track_370	14	2	1	0	0	0	15960	29792	45752	2629	370	370	57012	65310	0	0.173	0.557	0.069	0.125	0.135	406725	636910	264982	397904	99504
Track_371	13	2	2	0	0	0	15960	29792	45752	1115	371	371	81053	26425	0	0.16	0.441	0.039	0.123	0.145	325201	471363	217177	306710	79913
Track_373	15	1	1	0	0	0	15960	29792	45752	1266	373	373	53497	68852	0	0.165	0.366	0.063	0.138	0.095	472735	772032	200384	454520	162329
Track_377	12	2	2	0	0	0	14896	30856	45752	0.479	377	377	80700	21304	0	0.14	0.287	0.05	0.106	0.082	405708	881156	207863	378620	171242
Track_378	12	3	1	0	0	0	14896	30856	45752	0.733	378	378	80553	22616	0	0.321	0.848	0.039	0.261	0.241	318042	483316	241705	304614	69752
Track_380	14	1	1	0	0	0	14896	30856	45752	0.79	380	380	57075	63796	0	0.165	0.832	0.028	0.109	0.214	540635	894838	277881	515187	171042
Track_381	12	1	2	0	0	0	13832	31920	45752	1528	381	381	59972	62276	0	0.3	1350	0.04	0.203	0.364	306532	542629	213366	272447	100420
Track_383	13	1	1	0	0	0	13832	31920	45752	0.502	383	383	74669	41345	0	0.26	0.499	0.086	0.28	0.155	427637	649277	234778	382443	128903
Track_384	12	1	2	0	0	0	13832	31920	45752	0.982	384	384	47593	79967	0	0.198	0.934	0.041	0.099	0.254	407960	718237	215743	396701	127463
Track_385	12	2	1	0	0	0	13832	31920	45752	1544	385	385	73025	42358	0	0.324	1039	0.028	0.237	0.288	447835	706179	240389	440491	160635
Track_386	13	1	1	0	0	0	13832	31920	45752	0.962	386	386	85848	3741	0	0.332	0.546	0.167	0.316	0.135	314029	493348	216850	316188	78823
Track_387	13	1	1	0	0	0	13832	31920	45752	0.984	387	387	66554	50459	0	0.153	0.481	0.014	0.12	0.139	317806	558424	203468	322140	88631
Track_391	10	2	2	0	0	0	12768	32984	45752	1349	391	391	86465	1811	0	0.325	0.772	0.067	0.312	0.207	336099	473024	247270	360034	83711
Track_392	12	1	1	0	0	0	12768	32984	45752	0.291	392	392	84987	9868	0	0.281	0.818	0.049	0.227	0.224	292931	359570	232724	303983	38522
Track_393	11	1	1	0	0	0	11704	34048	45752	1935	393	393	78658	32045	0	0.411	1261	0.024	0.312	0.362	461157	792280	214792	475390	193346
Track_396	11	1	1	0	0	0	11704	34048	45752	1957	396	396	49381	74074	0	0.361	0.988	0.073	0.182	0.324	273928	438644	213471	250005	63713
Track_398	10	1	1	0	0	0	10640	34048	44688	0.828	398	398	67592	48529	0	0.209	0.486	0.07	0.142	0.14	452383	553289	321443	488264	74038
Track_399	11	1	1	0	0	0	11704	34048	45752	0.36	399	399	46476	80168	0	0.319	1185	0.095	0.197	0.328	364002	551673	206174	360103	114478
Track_401	10	2	1	0	0	0	11704	34048	45752	0.45	401	401	63289	58309	0	0.322	0.926	0.056	0.176	0.304	506317	921620	243775	511964	209511
Track_405	10	1	1	0	0	0	10640	35112	45752	1771	405	405	77448	34542	0	0.317	0.944	0.023	0.184	0.321	526417	823992	223122	586450	219458
Track_406	9	2	1	0	0	0	10640	35112	45752	1344	406	406	52648	69358	0	0.332	1052	0.063	0.186	0.345	284293	321974	248304	286172	25555
Track_409	9	1	2	0	0	0	10640	35112	45752	1265	409	409	70494	45021	0	0.331	0.945	0.046	0.204	0.324	344968	482398	202393	343773	88461
Track_411	9	1	2	0	0	0	10640	35112	45752	1027	411	411	86082	4995	0	0.284	1051	0.039	0.251	0.323	298132	389563	201537	278732	61125
Track_413	9	1	2	0	0	0	10640	35112	45752	0.494	413	413	84855	12519	0	0.364	1055	0.083	0.187	0.381	484843	656422	227147	483066	122794
Track_416	10	1	1	0	0	0	10640	35112	45752	0.541	416	416	61912	58571	0	0.171	0.412	0.053	0.169	0.124	415937	674540	332605	394849	93904
Track_418	10	1	1	0	0	0	10640	35112	45752	0.571	418	418	59964	60078	0	0.185	0.477	0.007	0.127	0.167	597059	1027567	365583	564496	195972

## Sheet: Control animal 2
																Mean speed										Average
Track_0	16	3	1	0	0	0	19152	0	19152	2256	0	0	88392	70244	0	0.459	1269	0.116	0.309	0.344	269757	439669	215384	258648	59194	0.381741
Track_1	15	0	0	0	0	0	14896	0	14896	1956	1	1	85924	69151	0	0.51	0.765	0.186	0.579	0.181	368083	773001	220073	326101	141348
Track_2	40	1	2	0	0	0	43624	0	43624	3872	2	2	86176	70997	0	0.419	1154	0.029	0.358	0.254	464923	1045825	200069	386122	229159
Track_6	27	0	0	0	0	0	27664	0	27664	2108	6	6	86050	70189	0	0.376	1063	0.029	0.359	0.253	482532	915485	228921	432491	187306
Track_7	22	0	0	0	0	0	22344	1064	23408	0.941	7	7	86040	65858	0	0.441	0.858	0.119	0.455	0.193	368242	726580	200352	345939	133143
Track_9	25	1	2	0	0	0	27664	0	27664	0.395	9	9	88401	66279	0	0.39	1182	0.079	0.357	0.25	378323	693458	203169	353757	139455
Track_10	59	2	1	0	0	0	63840	0	63840	4417	10	10	87536	67371	0	0.378	0.98	0.037	0.366	0.236	455657	1125165	213778	409326	197036
Track_12	24	1	1	0	0	0	25536	0	25536	0.71	12	12	86086	67416	0	0.357	0.875	0.055	0.322	0.229	468843	754150	201669	446308	148728
Track_13	30	1	2	0	0	0	32984	0	32984	0.598	13	13	87683	68698	0	0.398	1183	0.064	0.387	0.294	420568	934857	204536	372250	193724
Track_15	18	0	0	0	0	0	18088	0	18088	1251	15	15	87625	66963	0	0.505	1288	0.069	0.422	0.336	399764	752062	218666	386412	155600
Track_16	13	0	0	0	0	0	12768	0	12768	1056	16	16	85685	66541	0	0.468	0.863	0.108	0.504	0.257	402656	588570	229997	390431	95575
Track_17	22	0	0	0	0	0	22344	0	22344	0.642	17	17	86619	74992	0	0.361	0.806	0.048	0.318	0.227	440091	707503	220267	423603	147467
Track_18	46	0	0	0	0	0	47880	0	47880	0.986	18	18	86635	73818	0	0.341	0.778	0.026	0.327	0.201	552202	1064952	203945	518638	195826
Track_19	15	0	0	0	0	0	14896	0	14896	0.921	19	19	83831	75914	0	0.323	0.528	0.118	0.34	0.138	576788	1002675	245418	579563	191704
Track_20	12	0	0	0	0	0	11704	0	11704	2253	20	20	84361	73668	0	0.395	0.75	0.102	0.357	0.173	585639	976526	339203	587655	202823
Track_21	17	0	0	0	0	0	17024	0	17024	0.797	21	21	83682	77100	0	0.385	1009	0.077	0.356	0.223	434755	833615	242411	427961	132718
Track_23	59	2	1	0	0	0	63840	0	63840	1020	23	23	86371	76155	0	0.397	1118	0.048	0.342	0.253	491197	1040093	201159	463654	190379
Track_24	32	1	2	0	0	0	35112	1064	36176	1703	24	24	85430	71401	0	0.379	1112	0.067	0.326	0.232	581975	1437412	272199	552893	256292
Track_26	44	1	2	0	0	0	47880	0	47880	1457	26	26	84289	74675	0	0.358	0.844	0.024	0.334	0.196	538854	954174	227814	503047	189054
Track_29	21	1	1	0	0	0	22344	0	22344	0.288	29	29	87181	73833	0	0.387	0.906	0.049	0.375	0.233	430764	601966	204507	457809	119005
Track_31	19	1	1	0	0	0	20216	1064	21280	1711	31	31	86735	72520	0	0.436	0.857	0.065	0.418	0.275	395654	790102	217645	390491	147443
Track_32	44	0	0	0	0	0	45752	0	45752	1710	32	32	85512	78937	0	0.422	1235	0.09	0.358	0.24	500212	1130044	217711	450249	209370
Track_37	21	1	2	0	0	0	23408	0	23408	0.659	37	37	83399	79285	0	0.32	0.762	0.057	0.33	0.194	474276	871951	234481	448962	178378
Track_38	57	3	2	0	0	0	63840	0	63840	0.806	38	38	83679	79359	0	0.414	1407	0.031	0.392	0.28	426319	843966	205584	374052	157583
Track_39	20	0	0	0	0	0	20216	0	20216	1054	39	39	85137	80206	0	0.427	1098	0.055	0.379	0.265	456512	768848	220408	435533	175826
Track_41	31	5	2	0	0	0	39368	0	39368	2516	41	41	59504	20926	0	0.38	1071	0.065	0.284	0.279	309834	503180	200332	300357	77367
Track_43	59	2	1	0	0	0	63840	0	63840	4592	43	43	54217	20453	0	0.379	1238	0.047	0.273	0.301	373309	732502	200505	328933	141870
Track_44	22	0	0	0	0	0	22344	0	22344	2766	44	44	52162	19526	0	0.41	0.945	0.049	0.312	0.274	339435	527789	210488	324394	80853
Track_46	16	0	0	0	0	0	15960	0	15960	1563	46	46	54808	18997	0	0.293	0.704	0.041	0.248	0.189	482974	694534	227090	495745	122373
Track_47	29	3	1	0	0	0	32984	0	32984	5438	47	47	50659	20946	0	0.46	1310	0.054	0.343	0.336	359687	603642	205952	324742	117727
Track_49	20	1	1	0	0	0	21280	0	21280	1218	49	49	55826	19831	0	0.354	0.986	0.088	0.302	0.215	385381	695542	232443	361966	133228
Track_50	40	3	2	0	0	0	47880	0	47880	1482	50	50	61928	19171	0	0.368	0.785	0.045	0.376	0.181	336337	648076	204536	308526	114034
Track_51	42	0	0	0	0	0	43624	0	43624	1294	51	51	50847	19496	0	0.379	0.9	0.052	0.344	0.238	464013	854532	214250	454403	172231
Track_53	12	0	0	0	0	0	11704	0	11704	1981	53	53	58257	18685	0	0.3	0.854	0.098	0.273	0.222	459444	683008	245048	488348	142822
Track_54	22	1	1	0	0	0	23408	0	23408	1351	54	54	60304	19041	0	0.379	1111	0.088	0.296	0.286	329901	587650	210949	314436	92136
Track_56	30	1	2	0	0	0	32984	0	32984	1277	56	56	64612	21833	0	0.303	0.83	0.066	0.257	0.193	392155	592680	221328	402413	97162
Track_57	25	0	0	0	0	0	25536	0	25536	3788	57	57	59078	21652	0	0.422	1068	0.067	0.364	0.325	308039	426455	201949	308484	58787
Track_58	39	2	1	0	0	0	42560	0	42560	2581	58	58	63040	20512	0	0.362	1086	0.105	0.331	0.231	347357	603282	204494	328481	100819
Track_59	13	1	2	0	0	0	14896	0	14896	0.993	59	59	46067	20881	0	0.339	0.6	0.17	0.332	0.143	345283	779300	200546	265234	164696
Track_60	27	0	0	0	0	0	27664	0	27664	1738	60	60	65887	19930	0	0.462	1061	0.068	0.362	0.308	441498	717123	203057	461991	136615
Track_61	16	0	0	0	0	0	15960	0	15960	1368	61	61	50201	21863	0	0.478	1056	0.102	0.444	0.299	392409	586097	202790	413388	113147
Track_62	26	0	0	0	0	0	26600	0	26600	1268	62	62	66171	20678	0	0.385	1129	0.088	0.3	0.258	456637	1060236	200956	421424	204944
Track_63	18	0	0	0	0	0	18088	0	18088	2700	63	63	62192	21785	0	0.437	1117	0.124	0.284	0.274	292874	410979	200033	296509	55663
Track_64	11	0	0	0	0	0	10640	0	10640	1804	64	64	52507	22021	0	0.469	1026	0.159	0.5	0.318	429029	617559	284992	429980	104578
Track_65	22	1	2	0	0	0	24472	0	24472	3116	65	65	52919	21691	0	0.374	1084	0.076	0.326	0.259	311728	462248	201428	310885	80299
Track_66	18	0	0	0	0	0	18088	0	18088	1544	66	66	67145	21398	0	0.416	1291	0.08	0.382	0.298	456146	707731	225628	477709	148296
Track_67	29	5	2	0	0	0	37240	0	37240	3015	67	67	47953	22074	0	0.403	1084	0.03	0.372	0.3	319149	608292	200851	296385	106686
Track_68	36	1	2	0	0	0	39368	0	39368	5468	68	68	51284	21084	0	0.385	1136	0.034	0.291	0.286	312489	492293	209296	307724	69974
Track_70	59	2	1	0	0	0	63840	0	63840	1543	70	70	60744	19888	0	0.398	1410	0.046	0.245	0.337	302144	504296	202367	279804	76090
Track_71	30	1	1	0	0	0	31920	0	31920	0.43	71	71	56884	20485	0	0.351	1255	0.037	0.256	0.274	317477	611958	200580	301250	100590
Track_72	61	0	0	0	0	0	63840	0	63840	2473	72	72	65442	21290	0	0.407	1270	0.021	0.3	0.292	319497	642326	206652	273570	103820
Track_73	45	2	2	0	0	0	50008	0	50008	2608	73	73	51595	19790	0	0.375	1240	0.09	0.262	0.264	374376	739572	226581	358489	110252
Track_75	36	2	1	0	0	0	39368	0	39368	3723	75	75	55726	19288	0	0.352	1160	0.068	0.272	0.227	410461	1006685	203651	343708	198126
Track_76	28	1	2	0	0	0	30856	0	30856	0.054	76	76	57656	19893	0	0.287	0.674	0.053	0.303	0.149	362786	576012	206937	342293	110677
Track_77	53	5	2	0	0	0	63840	0	63840	4793	77	77	61012	22044	0	0.346	1037	0.047	0.29	0.219	325073	814121	201906	296127	119433
Track_79	13	0	0	0	0	0	12768	0	12768	1390	79	79	69063	21912	0	0.446	0.758	0.043	0.53	0.226	354765	606631	235223	339615	108067
Track_81	25	0	0	0	0	0	25536	0	25536	1817	81	81	68970	22626	0	0.365	0.911	0.027	0.301	0.271	447845	831777	226259	437361	142654
Track_82	57	1	1	0	0	0	60648	0	60648	3154	82	82	73168	25083	0	0.344	0.935	0.063	0.283	0.219	437661	739963	222492	427823	133072
Track_83	18	0	0	0	0	0	18088	0	18088	1230	83	83	67187	23180	0	0.295	0.922	0.011	0.254	0.252	400489	705166	228815	401631	135593
Track_85	24	1	1	0	0	0	25536	0	25536	3280	85	85	73397	25044	0	0.329	0.937	0.025	0.249	0.256	385295	595300	209838	376078	123009
Track_86	20	1	1	0	0	0	21280	0	21280	0.926	86	86	48427	21920	0	0.346	0.972	0.071	0.271	0.247	296874	515555	201850	279451	90665
Track_87	12	0	0	0	0	0	11704	0	11704	0.857	87	87	56518	21947	0	0.386	1077	0.073	0.232	0.352	479164	676887	203115	501973	122736
Track_89	20	0	0	0	0	0	20216	0	20216	1229	89	89	54992	21605	0	0.357	0.881	0.118	0.259	0.227	441045	710965	269147	427466	123230
Track_90	38	1	1	0	0	0	40432	0	40432	3434	90	90	55948	21377	0	0.405	1277	0.089	0.289	0.305	430100	701520	200872	436722	148770
Track_91	12	0	0	0	0	0	11704	0	11704	2154	91	91	59522	22482	0	0.522	1060	0.089	0.42	0.309	289053	503141	206087	269258	78458
Track_92	52	2	1	0	0	0	56392	0	56392	0.738	92	92	61942	22289	0	0.334	1311	0.032	0.264	0.245	366945	812616	218949	334059	131206
Track_93	19	1	1	0	0	0	20216	0	20216	1084	93	93	65969	22252	0	0.334	1139	0.083	0.217	0.302	372622	552550	230578	339132	98666
Track_94	22	0	0	0	0	0	22344	0	22344	0.961	94	94	57883	22087	0	0.425	1167	0.117	0.351	0.299	326144	592739	201032	286733	109375
Track_95	33	4	1	0	0	0	38304	0	38304	4597	95	95	68092	23339	0	0.371	1189	0.026	0.254	0.293	357149	661848	201934	337699	124338
Track_97	14	0	0	0	0	0	13832	0	13832	0.623	97	97	59910	21889	0	0.38	1396	0.063	0.267	0.35	334112	459102	211166	339309	79627
Track_98	58	1	1	0	0	0	61712	0	61712	2999	98	98	67292	20959	0	0.455	1105	0.026	0.38	0.268	387800	745628	205695	343098	146964
Track_99	56	5	1	0	0	0	63840	0	63840	3315	99	99	75280	25934	0	0.35	1074	0.033	0.273	0.23	512194	1459576	224116	423630	294143
Track_100	34	1	1	0	0	0	36176	0	36176	3897	100	100	75535	26922	0	0.468	1360	0.028	0.381	0.315	430464	700249	203483	402715	145704
Track_103	27	0	0	0	0	0	27664	1064	28728	1508	103	103	74645	24507	0	0.366	0.943	0.011	0.338	0.243	449579	1194256	201985	387921	235591
Track_106	29	0	0	0	0	0	29792	0	29792	1513	106	106	76253	25368	0	0.372	1034	0.032	0.27	0.273	562392	1343505	215103	515760	296348
Track_107	15	1	1	0	0	0	15960	0	15960	2648	107	107	72705	25693	0	0.299	0.796	0.106	0.245	0.199	538000	789543	221181	620052	197955
Track_108	20	0	0	0	0	0	20216	0	20216	2258	108	108	71161	24720	0	0.324	0.976	0.059	0.262	0.253	395977	740351	249913	383825	112096
Track_110	11	0	0	0	0	0	10640	0	10640	1978	110	110	80753	28597	0	0.356	0.598	0.069	0.465	0.21	576357	916496	208795	548920	240031
Track_111	21	0	0	0	0	0	21280	0	21280	2361	111	111	75701	26931	0	0.431	1244	0.061	0.376	0.32	436462	733675	220639	470180	146854
Track_114	33	2	2	0	0	0	37240	0	37240	0.873	114	114	79452	29210	0	0.399	1129	0.058	0.3	0.28	319994	511935	202492	307583	86748
Track_116	27	1	1	0	0	0	28728	0	28728	1206	116	116	79054	26689	0	0.311	0.687	0.052	0.259	0.176	422464	983638	200911	369064	158134
Track_117	20	1	1	0	0	0	21280	0	21280	0.881	117	117	80152	27461	0	0.376	0.857	0.074	0.38	0.218	382291	757939	219156	353297	133739
Track_118	48	1	2	0	0	0	52136	0	52136	1425	118	118	77383	26209	0	0.351	1052	0.009	0.247	0.272	426250	1006396	211119	391369	182981
Track_120	59	1	2	0	0	0	63840	0	63840	6386	120	120	82334	33362	0	0.37	1244	0.043	0.332	0.253	347500	723616	204077	324882	115654
Track_124	15	0	0	0	0	0	14896	0	14896	0.516	124	124	79941	30758	0	0.385	0.952	0.06	0.36	0.248	468376	829601	269118	403261	186202
Track_125	26	1	1	0	0	0	27664	0	27664	1602	125	125	83691	32381	0	0.368	0.9	0.041	0.289	0.227	359842	531508	207192	360915	87530
Track_126	34	1	1	0	0	0	36176	0	36176	1923	126	126	83064	31336	0	0.365	1030	0.022	0.326	0.229	407254	766063	200078	389061	150918
Track_127	21	0	0	0	0	0	21280	0	21280	1166	127	127	79949	31723	0	0.4	1013	0.096	0.334	0.286	473070	783067	221266	445777	173436
Track_129	60	1	1	0	0	0	63840	0	63840	3775	129	129	80958	31221	0	0.377	1122	0.009	0.326	0.266	466407	917803	207747	448250	152666
Track_130	17	0	0	0	0	0	17024	0	17024	0.251	130	130	77514	28619	0	0.463	0.962	0.02	0.485	0.308	482718	939983	259016	408792	188425
Track_131	37	1	1	0	0	0	39368	0	39368	1600	131	131	77902	29402	0	0.361	0.983	0.024	0.309	0.231	436002	1105939	212288	378686	217432
Track_133	12	0	0	0	0	0	11704	0	11704	1979	133	133	78135	29889	0	0.343	0.528	0.019	0.402	0.176	430096	651031	261070	445415	138986
Track_135	15	0	0	0	0	0	14896	0	14896	0.559	135	135	79206	30065	0	0.462	0.808	0.06	0.445	0.22	428346	733152	215133	455026	127421
Track_137	35	2	2	0	0	0	39368	0	39368	3160	137	137	85765	33742	0	0.31	0.722	0.038	0.271	0.175	430644	807810	224478	394637	150062
Track_138	33	1	1	0	0	0	35112	0	35112	1184	138	138	83664	36134	0	0.379	1020	0.03	0.341	0.255	462013	770690	207387	454614	156152
Track_139	18	1	1	0	0	0	19152	0	19152	1151	139	139	84824	37273	0	0.37	0.634	0.13	0.318	0.179	329154	640684	201181	285004	125999
Track_140	11	0	0	0	0	0	10640	0	10640	2286	140	140	85606	37993	0	0.475	1187	0.134	0.353	0.35	529074	749540	238338	491728	144903
Track_141	17	1	2	0	0	0	19152	1064	20216	1744	141	141	85044	32967	0	0.316	1140	0.09	0.228	0.251	432638	903449	239058	340638	188449
Track_142	31	2	2	0	0	0	36176	0	36176	2429	142	142	84432	33666	0	0.39	1033	0.043	0.366	0.255	453158	902836	240378	410811	177610
Track_143	27	0	0	0	0	0	27664	0	27664	2201	143	143	85936	35266	0	0.451	1106	0.063	0.371	0.313	429711	758647	235277	422571	136527
Track_145	40	1	1	0	0	0	42560	0	42560	3317	145	145	80662	31931	0	0.422	1331	0.03	0.364	0.283	392885	703417	208604	400091	122367
Track_146	29	1	1	0	0	0	30856	0	30856	3115	146	146	81537	33071	0	0.395	1146	0.062	0.268	0.325	367546	589212	220260	362444	97797
Track_148	22	0	0	0	0	0	22344	0	22344	1773	148	148	83007	34551	0	0.295	0.799	0.044	0.257	0.202	502668	780724	228971	527430	153056
Track_150	34	0	0	0	0	0	35112	0	35112	1221	150	150	84446	34248	0	0.372	1043	0.018	0.328	0.232	543187	1128339	213113	481352	234065
Track_151	20	1	1	0	0	0	21280	0	21280	0.589	151	151	86733	41913	0	0.372	0.778	0.028	0.311	0.234	313716	475589	209195	300680	73603
Track_152	16	0	0	0	0	0	15960	0	15960	1247	152	152	89292	43853	0	0.351	0.892	0.101	0.349	0.214	356479	587691	202851	355161	110673
Track_153	29	1	1	0	0	0	30856	0	30856	0.289	153	153	86866	43034	0	0.322	1270	0.025	0.337	0.255	407722	826598	202400	320182	184722
Track_154	35	3	1	0	0	0	39368	0	39368	1107	154	154	87902	40691	0	0.321	1064	0.062	0.299	0.234	339821	641984	210515	304818	118333
Track_156	19	1	2	0	0	0	21280	0	21280	2419	156	156	88014	42803	0	0.394	1020	0.054	0.383	0.257	314483	512097	203981	295819	84618
Track_159	39	1	1	0	0	0	41496	0	41496	2507	159	159	88566	44928	0	0.422	1182	0.041	0.353	0.299	357829	641883	207984	313045	129923
Track_160	56	4	2	0	0	0	63840	0	63840	1746	160	160	88167	44690	0	0.381	1254	0.005	0.343	0.287	328512	631430	204006	284610	110835
Track_161	14	1	2	0	0	0	15960	0	15960	3656	161	161	85844	37378	0	0.479	1102	0.09	0.368	0.332	386905	984826	210247	320366	244963
Track_162	23	0	0	0	0	0	23408	0	23408	1328	162	162	85868	37965	0	0.317	0.6	0.054	0.297	0.177	565788	1072345	218240	547523	231698
Track_164	50	3	2	0	0	0	56392	0	56392	2887	164	164	86722	36719	0	0.375	0.984	0.02	0.314	0.238	428661	844562	202650	403777	152437
Track_166	18	1	1	0	0	0	19152	0	19152	1324	166	166	86904	40459	0	0.326	0.877	0.064	0.202	0.241	410233	685526	201073	413974	130844
Track_167	32	0	0	0	0	0	32984	0	32984	0.999	167	167	86536	39201	0	0.319	1072	0.06	0.265	0.23	402262	706598	242868	376291	124972
Track_168	13	1	1	0	0	0	13832	1064	14896	1105	168	168	87860	39270	0	0.402	1078	0.087	0.391	0.273	329880	489066	201959	308892	86817
Track_169	28	1	1	0	0	0	29792	1064	30856	1949	169	169	88840	51764	0	0.366	1077	0.031	0.317	0.254	415427	754444	201694	429086	156921
Track_170	14	0	0	0	0	0	13832	1064	14896	0.685	170	170	87368	52130	0	0.631	1183	0.163	0.632	0.266	311307	786236	201678	263742	156389
Track_173	36	0	0	0	0	0	37240	0	37240	4327	173	173	89746	48248	0	0.343	1089	0.033	0.296	0.254	471650	927713	224642	444745	173362
Track_174	50	4	2	0	0	0	58520	0	58520	2249	174	174	88833	51712	0	0.488	1174	0.057	0.403	0.292	348023	739364	204862	318733	129556
Track_175	42	0	0	0	0	0	43624	0	43624	2870	175	175	90687	53227	0	0.385	0.952	0.052	0.316	0.233	446924	789824	210765	463768	146389
Track_176	18	0	0	0	0	0	18088	0	18088	2345	176	176	87077	53309	0	0.392	1092	0.044	0.375	0.277	487858	743412	215662	491572	175503
Track_178	32	0	0	0	0	0	32984	0	32984	3801	178	178	88436	56458	0	0.338	0.793	0.048	0.278	0.216	373711	551496	234754	358336	81063
Track_179	61	0	0	0	0	0	63840	0	63840	0.732	179	179	90348	54055	0	0.415	0.995	0.037	0.349	0.271	376576	694856	201403	344629	127230
Track_180	59	2	1	0	0	0	63840	0	63840	2155	180	180	88301	52512	0	0.384	1078	0.021	0.329	0.29	358759	704907	200933	349197	108220
Track_182	38	1	2	0	0	0	41496	1064	42560	3925	182	182	88243	49349	0	0.429	1245	0.019	0.326	0.281	384207	811464	203843	339812	153810
Track_183	34	1	1	0	0	0	36176	1064	37240	3210	183	183	88022	49663	0	0.395	1338	0.03	0.311	0.279	349970	641501	213174	331309	109562
Track_185	42	2	2	0	0	0	47880	0	47880	0.235	185	185	88186	46870	0	0.349	1073	0.011	0.291	0.259	397358	658173	201463	405834	126624
Track_186	44	3	2	0	0	0	50008	0	50008	5614	186	186	89080	45714	0	0.377	1190	0.034	0.317	0.262	351253	543062	201472	351585	89559
Track_187	55	3	2	0	0	0	63840	0	63840	1851	187	187	90050	50966	0	0.395	1143	0.043	0.354	0.268	380210	667135	201281	376835	113071
Track_188	39	1	1	0	0	0	41496	0	41496	0.978	188	188	90589	49392	0	0.37	0.883	0.028	0.357	0.231	431948	942715	240393	373336	157026
Track_190	25	0	0	0	0	0	25536	0	25536	1424	190	190	88166	48633	0	0.352	0.919	0.041	0.315	0.254	427697	1029081	201193	375438	206287
Track_193	11	0	0	0	0	0	10640	0	10640	1871	193	193	86796	62828	0	0.422	0.825	0.085	0.396	0.234	481325	692579	248367	508123	146928
Track_194	45	1	2	0	0	0	48944	0	48944	1928	194	194	87484	63958	0	0.379	1099	0.015	0.346	0.27	417719	759949	242332	396876	137173
Track_195	54	1	1	0	0	0	57456	0	57456	1073	195	195	86931	64086	0	0.357	1039	0.031	0.287	0.227	491814	1053941	204795	466269	216696
Track_198	11	0	0	0	0	0	10640	0	10640	0.244	198	198	89693	61874	0	0.536	1008	0.124	0.56	0.323	304950	439355	201851	259187	84474
Track_199	22	0	0	0	0	0	22344	0	22344	1440	199	199	86115	63497	0	0.426	0.962	0.094	0.334	0.278	437139	715183	202651	485978	168366
Track_200	34	2	1	0	0	0	37240	0	37240	1535	200	200	85619	65197	0	0.35	1112	0.068	0.262	0.292	447956	904408	204901	423467	176789
Track_201	12	2	2	0	0	0	14896	0	14896	0.854	201	201	86537	64493	0	0.354	0.624	0.111	0.365	0.152	418094	598603	224795	430372	94111
Track_202	32	0	0	0	0	0	32984	0	32984	2269	202	202	88633	62523	0	0.401	1141	0.129	0.36	0.23	410532	771950	232760	416561	135341
Track_203	33	1	2	0	0	0	36176	0	36176	2961	203	203	87725	64141	0	0.473	1378	0.08	0.375	0.315	393203	882966	202917	375579	135103
Track_205	29	1	2	0	0	0	31920	0	31920	1154	205	205	87640	56569	0	0.373	1144	0.059	0.305	0.268	413063	816006	202681	407320	152693
Track_206	18	0	0	0	0	0	18088	0	18088	0.961	206	206	90505	56554	0	0.36	0.754	0.055	0.24	0.219	437353	822442	203068	355123	172964
Track_207	29	1	1	0	0	0	30856	0	30856	1099	207	207	90287	58021	0	0.436	1223	0.031	0.358	0.32	443680	927775	208657	393079	190935
Track_208	44	0	0	0	0	0	45752	0	45752	5280	208	208	87151	59144	0	0.381	1073	0.03	0.29	0.264	445257	1071959	201928	438160	180271
Track_209	43	3	1	0	0	0	47880	0	47880	5095	209	209	87259	57274	0	0.387	1232	0.064	0.366	0.264	428023	797287	205945	397570	166540
Track_211	15	0	0	0	0	0	14896	0	14896	1739	211	211	88290	56634	0	0.425	0.841	0.043	0.404	0.223	377985	792157	216446	304846	154620
Track_212	18	0	0	0	0	0	18088	0	18088	2658	212	212	86993	58578	0	0.57	1337	0.094	0.474	0.377	413008	766743	202724	394116	151268
Track_213	15	1	1	0	0	0	15960	0	15960	1444	213	213	89348	58743	0	0.409	1043	0.154	0.3	0.249	488033	822977	223719	452654	189985
Track_214	17	0	0	0	0	0	17024	0	17024	2796	214	214	86470	61230	0	0.535	1165	0.151	0.586	0.304	370002	839391	206731	260148	180651
Track_215	37	0	0	0	0	0	38304	0	38304	2677	215	215	88358	61350	0	0.419	1056	0.038	0.388	0.291	449289	811542	275607	402061	135527
Track_216	35	0	0	0	0	0	36176	0	36176	4354	216	216	86515	61104	0	0.384	1294	0.038	0.298	0.299	467290	918242	202010	446784	203737
Track_218	10	1	2	0	0	0	11704	0	11704	1282	218	218	86926	58961	0	0.335	0.536	0.062	0.328	0.169	515823	1012351	213763	451190	251220
Track_221	14	2	2	0	0	0	17024	0	17024	1089	221	221	47302	19791	0	0.351	0.733	0.081	0.359	0.212	307166	454412	204366	285314	82563
Track_223	9	1	2	0	0	0	10640	0	10640	1663	223	223	51228	19948	0	0.225	0.659	0.049	0.177	0.198	419049	703799	221607	337988	167597
Track_224	54	5	2	0	0	0	63840	0	63840	2645	224	224	70858	22710	0	0.373	1213	0.052	0.353	0.261	493311	821534	201678	505462	174877
Track_225	9	2	1	0	0	0	10640	0	10640	0.729	225	225	51587	21139	0	0.422	1114	0.145	0.454	0.32	353519	623804	219886	323780	127384
Track_226	32	2	2	0	0	0	37240	0	37240	1316	226	226	73422	23883	0	0.351	0.992	0.033	0.319	0.233	517609	895215	258956	517839	172082
Track_227	19	1	2	0	0	0	21280	0	21280	4102	227	227	78556	28518	0	0.405	1233	0.101	0.383	0.259	451952	877175	247646	405526	166642
Track_229	54	5	2	0	0	0	62776	0	62776	4447	229	229	76324	27837	0	0.39	1163	0.016	0.329	0.263	480950	902686	205343	489515	190186
Track_232	10	1	1	0	0	0	10640	0	10640	1324	232	232	75623	26081	0	0.331	0.744	0.103	0.267	0.217	478008	716880	221337	479110	159574
Track_233	33	1	1	0	0	0	35112	0	35112	0.501	233	233	76302	27993	0	0.382	0.889	0.009	0.378	0.214	497413	884364	233309	463013	168743
Track_235	15	2	2	0	0	0	18088	0	18088	1903	235	235	77354	29023	0	0.273	0.676	0.089	0.269	0.151	371960	664599	204520	342941	138817
Track_237	34	3	2	0	0	0	39368	0	39368	1994	237	237	87369	39227	0	0.321	0.857	0.03	0.284	0.199	465236	767138	240577	449642	130444
Track_241	12	2	2	0	0	0	14896	0	14896	0.903	241	241	87151	44224	0	0.312	0.546	0.076	0.364	0.167	352144	482735	229875	399960	85951
Track_242	41	1	1	0	0	0	43624	0	43624	2892	242	242	85453	72666	0	0.422	1023	0.014	0.331	0.278	423468	929257	217146	381672	178883
Track_245	20	1	2	0	0	0	22344	0	22344	1071	245	245	84171	78369	0	0.522	1090	0.143	0.515	0.262	415846	944112	202295	346263	192200
Track_250	58	0	0	0	0	0	60648	2128	62776	1155	250	250	63500	22412	0	0.311	0.991	0.041	0.245	0.216	416755	671804	217125	416322	125535
Track_252	37	2	1	0	0	0	40432	2128	42560	2266	252	252	79927	31206	0	0.376	0.815	0.117	0.336	0.183	492829	815320	223438	504434	169929
Track_253	55	2	2	0	0	0	61712	2128	63840	0.762	253	253	86022	35611	0	0.478	1324	0.031	0.409	0.317	450372	1228788	201140	409147	213709
Track_255	18	1	2	0	0	0	20216	2128	22344	2387	255	255	89717	59845	0	0.463	0.822	0.096	0.437	0.229	414677	767472	212445	387780	155595
Track_256	46	6	2	0	0	0	56392	2128	58520	2964	256	256	87294	57464	0	0.366	1068	0.014	0.328	0.262	415267	1124590	214561	344582	195190
Track_260	54	3	1	0	0	0	59584	2128	61712	3752	260	260	88524	61309	0	0.371	1123	0.016	0.305	0.258	444038	962631	210065	411102	183120
Track_261	11	1	2	0	0	0	12768	2128	14896	1066	261	261	90133	60714	0	0.654	1030	0.092	0.71	0.27	388617	705178	211325	340214	145245
Track_264	58	1	1	0	0	0	61712	2128	63840	3188	264	264	60639	19774	0	0.416	1168	0.056	0.386	0.277	301901	542737	200182	291543	76522
Track_267	17	0	0	0	0	0	17024	5320	22344	1562	267	267	87314	46392	0	0.272	0.841	0.054	0.173	0.244	390637	704821	206764	385854	127411
Track_268	21	0	0	0	0	0	21280	5320	26600	2300	268	268	87379	47493	0	0.425	1178	0.075	0.313	0.322	406945	650859	209823	410850	122994
Track_269	19	1	1	0	0	0	20216	5320	25536	3380	269	269	88036	42267	0	0.397	1306	0.021	0.336	0.344	345511	643046	205014	318604	119937
Track_270	47	1	1	0	0	0	50008	4256	54264	2594	270	270	87986	51249	0	0.364	1183	0.048	0.313	0.275	358378	564121	204452	357157	103597
Track_271	32	1	2	0	0	0	35112	4256	39368	6354	271	271	89439	58315	0	0.319	1114	0.005	0.229	0.27	452991	862883	201826	435419	174424
Track_273	51	1	2	0	0	0	55328	4256	59584	4564	273	273	87111	57697	0	0.406	1140	0.022	0.394	0.288	439710	989022	200793	392801	188969
Track_274	41	1	1	0	0	0	43624	5320	48944	1593	274	274	87560	67671	0	0.361	1309	0.035	0.322	0.283	420123	770462	208587	398643	154634
Track_275	44	3	2	0	0	0	50008	3192	53200	3487	275	275	88678	66085	0	0.393	1247	0.075	0.31	0.281	380083	909266	201278	330850	180252
Track_278	31	0	0	0	0	0	31920	4256	36176	0.38	278	278	86506	73776	0	0.37	0.838	0.049	0.331	0.222	618461	1336330	207161	506487	325391
Track_279	26	2	1	0	0	0	28728	4256	32984	1760	279	279	85382	79916	0	0.468	1053	0.14	0.401	0.245	395994	759729	223273	408998	124652
Track_281	15	0	0	0	0	0	14896	3192	18088	1973	281	281	63517	19774	0	0.273	0.619	0.025	0.269	0.149	355349	502113	212179	370642	95386
Track_283	34	1	1	0	0	0	36176	3192	39368	2442	283	283	66270	21682	0	0.382	1251	0.023	0.307	0.317	324169	642239	202199	316668	100952
Track_284	21	1	1	0	0	0	22344	3192	25536	1169	284	284	55991	18979	0	0.332	1023	0.065	0.292	0.24	377618	499038	227388	361764	72287
Track_285	36	0	0	0	0	0	37240	3192	40432	1180	285	285	53761	21556	0	0.377	1089	0.062	0.3	0.26	372923	648224	213151	360766	106270
Track_287	11	0	0	0	0	0	10640	3192	13832	0.469	287	287	60830	22822	0	0.266	0.521	0.046	0.343	0.152	315066	515953	217127	265877	89549
Track_288	56	2	1	0	0	0	60648	3192	63840	1853	288	288	51694	21936	0	0.398	1084	0.053	0.31	0.286	374125	669286	204557	359327	127011
Track_289	22	1	1	0	0	0	23408	3192	26600	2467	289	289	64817	21064	0	0.481	1164	0.045	0.329	0.363	403660	583148	224382	397692	99730
Track_294	13	2	2	0	0	0	15960	5320	21280	1144	294	294	49780	19491	0	0.434	0.986	0.051	0.379	0.333	381345	697350	206830	286057	148895
Track_299	24	0	0	0	0	0	24472	8512	32984	0.9	299	299	83495	77418	0	0.395	0.919	0.055	0.332	0.213	463844	673900	229128	464737	120596
Track_300	23	0	0	0	0	0	23408	8512	31920	1905	300	300	83167	79057	0	0.433	1302	0.099	0.342	0.335	564858	1134132	235799	522793	230369
Track_301	16	1	1	0	0	0	17024	7448	24472	3282	301	301	58352	19233	0	0.584	1240	0.177	0.437	0.349	296097	402832	230033	297457	44409
Track_304	27	2	2	0	0	0	30856	7448	38304	2244	304	304	62165	22682	0	0.34	0.768	0.101	0.303	0.176	374798	574237	207443	372876	102963
Track_305	46	2	2	0	0	0	52136	8512	60648	5087	305	305	71186	23971	0	0.412	1150	0.04	0.37	0.258	364324	565682	219666	375179	92817
Track_306	12	0	0	0	0	0	11704	7448	19152	1697	306	306	78905	27692	0	0.4	0.687	0.1	0.4	0.207	363556	910946	201380	293113	199787
Track_307	20	0	0	0	0	0	20216	7448	27664	3035	307	307	77734	29363	0	0.343	1065	0.033	0.259	0.278	444514	1245749	210299	403563	220691
Track_308	27	2	1	0	0	0	29792	7448	37240	3140	308	308	81530	28767	0	0.42	0.988	0.013	0.39	0.253	313713	491517	201369	281182	84082
Track_309	27	2	2	0	0	0	30856	8512	39368	1548	309	309	82328	29584	0	0.385	1248	0.07	0.322	0.284	456953	765759	201313	419319	160688
Track_311	25	0	0	0	0	0	25536	7448	32984	2556	311	311	87030	37807	0	0.363	0.913	0.066	0.265	0.247	381568	781486	200309	321437	152599
Track_314	17	1	1	0	0	0	18088	9576	27664	0.25	314	314	82904	36376	0	0.211	0.648	0.016	0.206	0.162	636296	760521	513707	633509	69309
Track_316	35	3	2	0	0	0	41496	10640	52136	2087	316	316	84105	32439	0	0.359	1024	0.05	0.315	0.238	342633	556172	204169	317646	95337
Track_317	48	2	2	0	0	0	53200	10640	63840	4461	317	317	86477	41595	0	0.325	1233	0.023	0.249	0.278	402615	1039824	215923	349861	203216
Track_321	24	3	2	0	0	0	28728	9576	38304	2780	321	321	87574	53745	0	0.421	1317	0.044	0.26	0.394	347580	616232	213947	344663	101783
Track_322	49	2	1	0	0	0	53200	10640	63840	0.372	322	322	85712	66337	0	0.356	0.851	0.043	0.306	0.221	382912	782250	202884	364251	122672
Track_323	28	2	1	0	0	0	30856	10640	41496	1022	323	323	85287	67541	0	0.38	1308	0.064	0.281	0.33	431051	828737	215582	396788	155928
Track_324	44	5	2	0	0	0	53200	10640	63840	3957	324	324	87542	71982	0	0.397	1354	0.046	0.322	0.313	353104	756027	204552	344181	111457
Track_325	44	1	2	0	0	0	47880	10640	58520	4163	325	325	87128	71231	0	0.369	1251	0.046	0.339	0.245	401401	901209	207234	356819	160852
Track_326	12	0	0	0	0	0	11704	10640	22344	1073	326	326	85641	69106	0	0.419	1339	0.088	0.324	0.346	308264	497699	211675	274905	90726
Track_327	51	0	0	0	0	0	53200	10640	63840	3117	327	327	89081	63591	0	0.425	1346	0.015	0.334	0.313	363709	611088	205872	351298	110922
Track_329	44	0	0	0	0	0	45752	9576	55328	2015	329	329	85071	72919	0	0.332	1014	0.01	0.319	0.189	477255	869633	209804	470912	154281
Track_330	39	0	0	0	0	0	40432	9576	50008	1227	330	330	86885	75345	0	0.393	0.938	0.043	0.354	0.22	498682	973659	209627	439158	218129
Track_331	36	0	0	0	0	0	37240	10640	47880	2307	331	331	46832	20781	0	0.397	1345	0.051	0.284	0.309	358666	898871	202974	301843	157308
Track_333	13	0	0	0	0	0	12768	10640	23408	2150	333	333	45968	21308	0	0.335	1073	0.093	0.276	0.275	317492	442814	204651	312090	65471
Track_335	47	3	2	0	0	0	54264	9576	63840	3879	335	335	67632	22384	0	0.403	1198	0.025	0.333	0.281	352439	740490	200750	312084	134873
Track_336	17	1	1	0	0	0	18088	10640	28728	1800	336	336	48319	20279	0	0.296	0.921	0.081	0.222	0.222	317785	462976	204861	301181	77298
Track_338	40	2	2	0	0	0	44688	9576	54264	2763	338	338	70154	23912	0	0.36	1089	0.029	0.264	0.284	404276	662639	217354	417590	112823
Track_339	48	0	0	0	0	0	50008	10640	60648	2612	339	339	80271	28035	0	0.332	1281	0.053	0.236	0.251	354798	857891	203497	324224	121883
Track_340	37	2	1	0	0	0	40432	11704	52136	0.915	340	340	62497	20237	0	0.457	1308	0.05	0.454	0.327	276260	381224	210598	262942	48930
Track_344	50	0	0	0	0	0	52136	11704	63840	1114	344	344	77063	28286	0	0.335	0.98	0.027	0.3	0.193	522705	953769	224614	524659	182836
Track_345	24	0	0	0	0	0	24472	11704	36176	1951	345	345	83245	35747	0	0.331	1333	0.036	0.263	0.288	521348	855012	250158	526459	174053
Track_346	26	1	1	0	0	0	27664	11704	39368	1416	346	346	88510	42151	0	0.374	1335	0.071	0.278	0.312	287374	426742	205184	282919	61382
Track_347	23	0	0	0	0	0	23408	11704	35112	0.713	347	347	90148	47212	0	0.356	1336	0.013	0.228	0.337	421704	639713	209919	428791	138325
Track_348	35	0	0	0	0	0	36176	11704	47880	1576	348	348	90154	50130	0	0.329	0.945	0.024	0.277	0.231	495645	913597	244594	428246	203315
Track_349	38	1	2	0	0	0	41496	12768	54264	1331	349	349	63285	19033	0	0.377	1224	0.036	0.337	0.289	348187	568634	208378	339107	90635
Track_351	49	0	0	0	0	0	51072	12768	63840	5767	351	351	74956	25110	0	0.383	1322	0.017	0.343	0.254	436664	820793	209170	430933	134307
Track_352	20	0	0	0	0	0	20216	12768	32984	0.95	352	352	78473	26519	0	0.341	0.72	0.064	0.327	0.207	492913	879041	207302	477622	186997
Track_353	16	0	0	0	0	0	15960	12768	28728	1781	353	353	82568	28781	0	0.416	1068	0.086	0.227	0.324	322674	453534	226186	327502	57004
Track_355	36	1	1	0	0	0	38304	12768	51072	2498	355	355	90201	57562	0	0.263	0.83	0.039	0.227	0.181	464762	754992	214526	468934	133923
Track_357	46	3	1	0	0	0	51072	12768	63840	1058	357	357	89451	63219	0	0.328	0.995	0.011	0.291	0.199	476662	1073597	215466	441868	182884
Track_358	26	1	1	0	0	0	27664	12768	40432	2784	358	358	89172	60564	0	0.429	1231	0.03	0.328	0.348	435077	694059	201896	406948	133425
Track_359	19	1	2	0	0	0	21280	13832	35112	1040	359	359	82390	34484	0	0.297	0.698	0.081	0.262	0.151	456474	765927	233552	441053	173970
Track_361	12	0	0	0	0	0	11704	14896	26600	0.801	361	361	87330	44604	0	0.498	1057	0.108	0.293	0.38	268149	367749	206782	274392	49248
Track_362	16	0	0	0	0	0	15960	14896	30856	1183	362	362	85331	38427	0	0.381	0.88	0.035	0.343	0.256	458773	813145	240922	476804	157390
Track_365	11	0	0	0	0	0	10640	14896	25536	2631	365	365	90627	54519	0	0.548	1278	0.07	0.643	0.437	320707	480329	226800	284937	82633
Track_367	28	0	0	0	0	0	28728	14896	43624	3596	367	367	86567	61061	0	0.329	1034	0.059	0.207	0.277	367745	822828	211454	364460	134586
Track_368	45	1	2	0	0	0	48944	14896	63840	1591	368	368	86740	60407	0	0.377	0.982	0.064	0.307	0.235	440031	890746	221429	394783	166049
Track_369	27	2	1	0	0	0	29792	14896	44688	1613	369	369	87694	61429	0	0.349	1111	0.075	0.27	0.261	362365	583691	208353	360898	103335
Track_370	47	0	0	0	0	0	48944	14896	63840	1233	370	370	87041	55332	0	0.275	0.735	0.024	0.242	0.19	412870	642187	202878	435447	108781
Track_371	11	1	1	0	0	0	11704	14896	26600	0.725	371	371	88714	63760	0	0.431	1093	0.128	0.366	0.318	368814	545425	218932	393266	104945
Track_373	33	2	1	0	0	0	36176	13832	50008	5635	373	373	86238	71140	0	0.379	1164	0.047	0.295	0.286	402395	666963	204971	385855	121505
Track_376	24	0	0	0	0	0	24472	13832	38304	1304	376	376	83823	76119	0	0.349	0.863	0.106	0.32	0.21	569889	986217	222963	567882	220261
Track_377	45	2	2	0	0	0	50008	13832	63840	3547	377	377	85215	79289	0	0.41	1155	0.107	0.331	0.23	467226	1073550	205024	430766	200725
Track_378	14	0	0	0	0	0	13832	13832	27664	1612	378	378	67956	20795	0	0.274	0.539	0.077	0.246	0.122	402089	591346	228605	417164	107862
Track_379	12	1	2	0	0	0	13832	14896	28728	0.892	379	379	71641	23691	0	0.346	0.851	0.041	0.305	0.259	385566	601944	201781	390743	138250
Track_380	30	0	0	0	0	0	30856	14896	45752	0.895	380	380	72649	23714	0	0.401	0.983	0.064	0.341	0.246	353606	579504	207592	360049	100903
Track_382	25	0	0	0	0	0	25536	13832	39368	1489	382	382	68931	24191	0	0.373	1327	0.066	0.35	0.309	327744	514882	204620	312448	84180
Track_383	32	0	0	0	0	0	32984	14896	47880	0.409	383	383	80869	28224	0	0.334	0.953	0.039	0.322	0.241	412510	764036	205599	424588	132581
Track_387	19	1	1	0	0	0	20216	15960	36176	0.468	387	387	84549	73750	0	0.243	0.579	0.044	0.207	0.161	655737	1002732	321550	658971	187404
Track_388	39	4	2	0	0	0	47880	15960	63840	0.768	388	388	53446	19744	0	0.37	0.899	0.029	0.315	0.222	308384	482815	200624	297809	77832
Track_389	23	0	0	0	0	0	23408	15960	39368	1269	389	389	49423	20495	0	0.251	0.969	0.01	0.203	0.232	291019	521185	201307	268019	84573
Track_391	32	5	2	0	0	0	40432	15960	56392	2079	391	391	46062	20994	0	0.374	1017	0.063	0.258	0.261	285568	496449	204201	255557	80891
Track_392	42	1	1	0	0	0	44688	15960	60648	3521	392	392	67390	22625	0	0.478	1175	0.039	0.442	0.317	314967	711937	200295	279689	106087
Track_393	17	1	1	0	0	0	18088	15960	34048	1026	393	393	67413	23027	0	0.298	0.776	0.03	0.251	0.209	359759	599143	211389	316470	112119
Track_394	40	4	2	0	0	0	47880	15960	63840	3901	394	394	81895	33341	0	0.372	1124	0.019	0.278	0.312	400872	673123	222182	413713	123754
Track_396	32	0	0	0	0	0	32984	15960	48944	1181	396	396	85901	39053	0	0.318	1021	0.057	0.23	0.247	450325	837812	208323	428752	133456
Track_397	17	0	0	0	0	0	17024	17024	34048	0.789	397	397	63731	22898	0	0.273	0.49	0.067	0.291	0.115	365385	518049	237644	342068	92593
Track_399	28	1	2	0	0	0	30856	17024	47880	2074	399	399	78419	27372	0	0.458	1116	0.072	0.364	0.288	367236	659821	231275	381293	101471
Track_401	12	0	0	0	0	0	11704	17024	28728	0.256	401	401	86762	61687	0	0.169	0.474	0.025	0.145	0.134	354082	527301	233600	343950	98190
Track_404	37	2	2	0	0	0	41496	18088	59584	2607	404	404	64131	20237	0	0.4	1049	0.05	0.375	0.266	320751	604543	201116	286836	104322
Track_405	34	1	1	0	0	0	36176	18088	54264	2026	405	405	59607	19514	0	0.432	1086	0.039	0.38	0.269	311321	541368	205613	288155	78801
Track_406	14	0	0	0	0	0	13832	18088	31920	0.73	406	406	57356	22567	0	0.293	1135	0.022	0.225	0.294	381016	603710	204942	350152	136181
Track_407	36	2	2	0	0	0	40432	18088	58520	2771	407	407	79033	28138	0	0.441	1288	0.021	0.302	0.311	361070	944015	203995	316596	156469
Track_408	39	3	2	0	0	0	45752	18088	63840	2429	408	408	84806	36168	0	0.438	1183	0.086	0.435	0.261	409862	786445	201800	398475	152212
Track_409	21	1	1	0	0	0	22344	18088	40432	1210	409	409	84470	37549	0	0.39	0.76	0.066	0.46	0.231	434559	863127	246093	435013	134225
Track_411	28	1	2	0	0	0	30856	18088	48944	1225	411	411	87768	47355	0	0.413	1064	0.051	0.317	0.267	402654	652486	208415	372510	136488
Track_412	25	1	1	0	0	0	26600	18088	44688	2180	412	412	89736	52763	0	0.344	1132	0.022	0.287	0.262	401424	604536	210725	421558	119332
Track_413	40	3	2	0	0	0	45752	18088	63840	2920	413	413	88079	65369	0	0.339	0.99	0.028	0.245	0.248	430586	924548	208384	415030	164719
Track_416	42	1	1	0	0	0	44688	19152	63840	2999	416	416	85219	73552	0	0.35	1148	0.086	0.254	0.26	462409	871520	233792	468631	150181
Track_417	16	0	0	0	0	0	15960	19152	35112	0.784	417	417	51573	19281	0	0.318	0.844	0.088	0.256	0.195	440960	578936	231269	435379	92859
Track_420	18	2	1	0	0	0	20216	20216	40432	1117	420	420	90215	60295	0	0.427	1263	0.074	0.321	0.344	329459	483580	221988	313659	75139
Track_423	26	1	1	0	0	0	27664	20216	47880	2414	423	423	50836	21927	0	0.344	0.799	0.049	0.31	0.208	298194	447017	216207	283195	56424
Track_424	39	2	2	0	0	0	43624	20216	63840	4129	424	424	74555	26733	0	0.34	1272	0.03	0.265	0.256	431221	874792	207917	426242	168470
Track_425	16	0	0	0	0	0	15960	20216	36176	0.999	425	425	76052	25206	0	0.322	1128	0.095	0.251	0.251	356425	587685	211159	328006	107939
Track_426	19	0	0	0	0	0	19152	20216	39368	1787	426	426	81455	28885	0	0.342	0.806	0.034	0.324	0.191	443468	613839	258440	445557	109158
Track_428	37	1	1	0	0	0	39368	21280	60648	2470	428	428	85921	70343	0	0.36	1046	0.078	0.325	0.237	554371	943801	201485	530020	227013
Track_431	22	2	1	0	0	0	24472	21280	45752	1011	431	431	58314	19096	0	0.421	1292	0.105	0.309	0.307	364238	694555	204231	342465	139110
Track_432	10	1	1	0	0	0	10640	21280	31920	2520	432	432	49311	18839	0	0.474	1185	0.087	0.301	0.39	325086	617759	207809	301738	135809
Track_433	11	0	0	0	0	0	10640	21280	31920	2138	433	433	59126	19846	0	0.693	1343	0.115	0.864	0.447	285294	635007	200516	237666	121935
Track_434	15	0	0	0	0	0	14896	21280	36176	0.823	434	434	59486	22477	0	0.279	1073	0.074	0.248	0.255	297239	480407	207336	281887	82555
Track_435	14	0	0	0	0	0	13832	21280	35112	1074	435	435	85365	35751	0	0.363	0.769	0.033	0.359	0.211	367018	589653	210511	366589	123503
Track_436	11	1	2	0	0	0	12768	21280	34048	1757	436	436	89419	53315	0	0.424	0.91	0.061	0.368	0.281	326418	396983	205923	343946	56918
Track_437	34	2	1	0	0	0	37240	21280	58520	0.6	437	437	86749	53622	0	0.329	1276	0.048	0.316	0.233	343279	578857	207711	335580	101618
Track_444	17	0	0	0	0	0	17024	22344	39368	1110	444	444	83895	31459	0	0.386	0.968	0.048	0.37	0.254	363986	603539	223143	359130	112263
Track_445	25	0	0	0	0	0	25536	22344	47880	1547	445	445	86738	56174	0	0.315	0.74	0.049	0.305	0.161	413630	849935	209676	404092	144851
Track_446	11	0	0	0	0	0	10640	22344	32984	0.298	446	446	87033	59532	0	0.279	0.795	0.055	0.197	0.23	631654	1056436	308271	686702	251155
Track_447	15	0	0	0	0	0	14896	22344	37240	1789	447	447	85118	68325	0	0.366	0.852	0.093	0.326	0.236	410390	650824	205295	426432	158450
Track_450	27	1	1	0	0	0	28728	23408	52136	2128	450	450	68280	21314	0	0.429	1257	0.05	0.402	0.335	311425	531497	211119	294142	78111
Track_451	18	0	0	0	0	0	18088	23408	41496	1167	451	451	76894	25990	0	0.43	0.966	0.068	0.366	0.278	479518	944810	233765	433433	183858
Track_452	35	1	1	0	0	0	37240	23408	60648	4243	452	452	81080	30320	0	0.346	0.945	0.019	0.278	0.234	349791	523299	219764	341119	72109
Track_453	10	1	2	0	0	0	11704	23408	35112	2630	453	453	89217	42432	0	0.439	1175	0.055	0.197	0.43	375390	596080	210104	384668	129048
Track_456	32	0	0	0	0	0	32984	23408	56392	1053	456	456	86240	39880	0	0.304	0.763	0.046	0.261	0.183	435719	777633	210054	437061	123171
Track_457	38	1	1	0	0	0	40432	23408	63840	7823	457	457	88021	60226	0	0.325	0.793	0.051	0.292	0.186	404376	1187106	201161	339712	195280
Track_458	15	1	2	0	0	0	17024	23408	40432	2210	458	458	62559	19416	0	0.384	1113	0.088	0.294	0.284	331294	504968	210924	319367	86336
Track_459	23	1	1	0	0	0	24472	24472	48944	2370	459	459	89946	55909	0	0.412	1370	0.023	0.312	0.34	347295	639424	201333	316923	120738
Track_461	38	0	0	0	0	0	39368	24472	63840	2486	461	461	86961	61274	0	0.434	1012	0.024	0.267	0.308	445896	973096	203613	424882	181406
Track_462	35	2	2	0	0	0	39368	24472	63840	3221	462	462	70647	24488	0	0.394	1248	0.07	0.276	0.332	360810	629831	212262	346269	113302
Track_464	15	0	0	0	0	0	14896	25536	40432	1383	464	464	68340	20896	0	0.334	0.704	0.09	0.324	0.207	359128	617678	210771	292664	139953
Track_465	37	0	0	0	0	0	38304	25536	63840	1378	465	465	53743	21477	0	0.466	1191	0.011	0.451	0.3	357856	554749	204029	342213	94973
Track_466	33	2	1	0	0	0	36176	25536	61712	0.574	466	466	71411	23817	0	0.358	0.923	0.049	0.291	0.229	374147	631504	228034	370947	95292
Track_468	35	2	1	0	0	0	38304	25536	63840	0.842	468	468	80319	30142	0	0.419	1370	0.111	0.355	0.291	382168	706207	205919	369033	128071
Track_471	31	3	2	0	0	0	36176	27664	63840	2548	471	471	90142	48236	0	0.474	1140	0.118	0.433	0.282	333562	511306	203805	300160	95537
Track_472	36	0	0	0	0	0	37240	26600	63840	3294	472	472	89062	52560	0	0.295	0.964	0.009	0.242	0.223	479102	1001159	225379	432989	207545
Track_474	22	0	0	0	0	0	22344	26600	48944	2674	474	474	65886	19992	0	0.44	0.964	0.073	0.377	0.246	425241	748689	230639	407993	149753
Track_475	13	0	0	0	0	0	12768	26600	39368	0.374	475	475	66127	19967	0	0.302	0.567	0.055	0.398	0.179	309016	403919	220599	315855	54350
Track_477	35	0	0	0	0	0	36176	27664	63840	1544	477	477	85911	63877	0	0.381	1084	0.014	0.298	0.288	388096	854087	201776	341039	164658
Track_478	32	2	2	0	0	0	36176	27664	63840	2362	478	478	48096	21090	0	0.303	1046	0.06	0.242	0.201	324219	465835	211000	320973	73185
Track_480	25	2	2	0	0	0	28728	26600	55328	1932	480	480	89904	62113	0	0.311	0.95	0.048	0.26	0.229	417574	611687	216565	398998	113016
Track_484	21	0	0	0	0	0	21280	26600	47880	0.362	484	484	83783	76622	0	0.308	0.725	0.095	0.281	0.154	555223	844180	350049	544420	137074
Track_487	17	1	1	0	0	0	18088	26600	44688	1821	487	487	83683	30451	0	0.425	0.771	0.145	0.393	0.181	313025	439191	211849	337249	74349
Track_488	33	2	1	0	0	0	36176	27664	63840	3095	488	488	82234	32425	0	0.361	0.909	0.018	0.287	0.263	354672	653969	205540	318763	128038
Track_490	17	0	0	0	0	0	17024	27664	44688	1748	490	490	84046	36331	0	0.512	1039	0.138	0.512	0.27	429019	755468	200578	374710	181768
Track_493	30	1	2	0	0	0	32984	28728	61712	2751	493	493	90153	52063	0	0.485	1084	0.007	0.418	0.297	372255	604417	205192	384584	113909
Track_496	30	2	2	0	0	0	35112	28728	63840	3587	496	496	88654	59415	0	0.321	0.74	0.024	0.28	0.214	370456	545183	214332	368400	93345
Track_498	31	2	2	0	0	0	35112	28728	63840	0.952	498	498	86055	65069	0	0.331	1069	0.033	0.271	0.253	365918	549549	218975	355768	97033
Track_500	13	1	1	0	0	0	13832	28728	42560	0.909	500	500	61796	18650	0	0.412	0.943	0.101	0.407	0.29	357160	434928	237933	355749	51599
Track_502	20	2	2	0	0	0	23408	28728	52136	2678	502	502	49094	19948	0	0.312	1180	0.045	0.24	0.268	288776	392736	201970	280886	52380
Track_503	34	0	0	0	0	0	35112	28728	63840	1844	503	503	57784	21950	0	0.399	1217	0.01	0.298	0.322	340522	554836	202538	322216	86905
Track_504	14	0	0	0	0	0	13832	28728	42560	2072	504	504	75297	26747	0	0.372	0.894	0.049	0.298	0.267	332183	610335	224577	308080	94676
Track_506	29	1	2	0	0	0	31920	29792	61712	0.75	506	506	83114	78501	0	0.355	0.852	0.017	0.244	0.254	614547	1116430	221639	579621	238989
Track_507	33	0	0	0	0	0	34048	29792	63840	3946	507	507	85597	76397	0	0.443	1164	0.03	0.337	0.316	401341	887312	221523	406194	134354
Track_509	28	3	2	0	0	0	34048	29792	63840	3043	509	509	57649	21729	0	0.39	1019	0.046	0.362	0.237	353275	846641	211676	297719	152381
Track_510	30	3	1	0	0	0	34048	29792	63840	0.988	510	510	50001	21912	0	0.379	1018	0.09	0.301	0.236	295787	491607	200462	291050	73352
Track_512	17	2	1	0	0	0	19152	29792	48944	2917	512	512	86622	40705	0	0.477	0.919	0.016	0.5	0.306	313619	791811	214576	276299	131995
Track_513	25	2	2	0	0	0	28728	29792	58520	0.844	513	513	85906	37934	0	0.423	1040	0.083	0.364	0.317	310693	682484	202937	271049	108452
Track_514	19	1	1	0	0	0	20216	29792	50008	1136	514	514	84755	36626	0	0.443	0.82	0.055	0.427	0.239	448230	816618	216428	399239	173236
Track_517	31	1	1	0	0	0	32984	30856	63840	0.333	517	517	55907	19373	0	0.433	1287	0.016	0.354	0.313	360130	600927	201519	354250	118352
Track_519	17	0	0	0	0	0	17024	30856	47880	2630	519	519	64673	22204	0	0.509	1213	0.174	0.408	0.309	317329	465070	223442	294689	83572
Track_520	13	1	1	0	0	0	13832	30856	44688	1718	520	520	55230	22173	0	0.574	1173	0.186	0.533	0.35	304185	457775	211214	280495	77762
Track_522	32	0	0	0	0	0	32984	30856	63840	1954	522	522	73277	26000	0	0.333	0.766	0.077	0.307	0.155	353450	535384	203876	330890	112535
Track_523	19	1	2	0	0	0	21280	30856	52136	0.487	523	523	89756	44810	0	0.313	0.749	0.078	0.272	0.186	342317	447000	254807	334877	60239
Track_524	26	3	2	0	0	0	30856	32984	63840	2616	524	524	85707	79810	0	0.387	1220	0.082	0.334	0.27	429966	718417	227425	479548	147407
Track_527	26	1	1	0	0	0	27664	32984	60648	0.23	527	527	86007	34408	0	0.562	1151	0.076	0.495	0.319	366400	815827	208806	304325	155869
Track_528	20	0	0	0	0	0	20216	32984	53200	0.962	528	528	84961	37550	0	0.338	0.881	0.103	0.236	0.245	455379	770412	220864	416883	162789
Track_529	19	1	1	0	0	0	20216	32984	53200	1229	529	529	90381	47240	0	0.394	1112	0.084	0.346	0.26	353474	498995	224396	333926	80803
Track_531	26	1	2	0	0	0	28728	32984	61712	2415	531	531	90322	57707	0	0.346	0.901	0.048	0.294	0.225	460035	732938	202545	440744	143158
Track_532	29	2	1	0	0	0	31920	31920	63840	0.6	532	532	85582	78885	0	0.447	1082	0.073	0.369	0.296	351004	630191	203345	322921	109774
Track_535	16	1	2	0	0	0	18088	34048	52136	1673	535	535	86525	62789	0	0.486	1299	0.062	0.432	0.359	331938	607129	214278	309287	105886
Track_536	26	2	2	0	0	0	29792	34048	63840	2341	536	536	68324	20880	0	0.361	0.757	0.062	0.387	0.166	384457	761473	201586	338109	148924
Track_539	12	1	1	0	0	0	12768	34048	46816	1794	539	539	82239	30143	0	0.348	0.561	0.102	0.364	0.164	405569	526028	299532	414460	64520
Track_540	27	1	1	0	0	0	28728	35112	63840	1494	540	540	85595	34029	0	0.341	0.784	0.097	0.306	0.172	434024	1064210	239747	393800	170543
Track_541	22	1	1	0	0	0	23408	35112	58520	2398	541	541	84513	34886	0	0.311	0.653	0.115	0.303	0.155	375341	707458	204673	347552	150157
Track_542	26	1	2	0	0	0	28728	35112	63840	3949	542	542	84541	31941	0	0.336	1152	0.054	0.245	0.263	350002	616260	207432	339558	97538
Track_543	15	0	0	0	0	0	14896	36176	51072	0.861	543	543	81326	31133	0	0.336	0.59	0.105	0.34	0.127	403280	624263	227354	419639	134081
Track_548	26	2	1	0	0	0	28728	35112	63840	0.869	548	548	89096	43493	0	0.338	0.857	0.026	0.3	0.218	387952	804782	204683	359876	173054
Track_550	9	2	1	0	0	0	10640	36176	46816	1785	550	550	87709	67498	0	0.527	1079	0.143	0.646	0.343	281115	337620	223633	261625	41040
Track_551	25	1	2	0	0	0	27664	36176	63840	0.322	551	551	86027	67186	0	0.348	0.91	0.056	0.334	0.214	466758	784615	240073	446423	144130
Track_553	25	1	1	0	0	0	26600	35112	61712	1320	553	553	85990	69230	0	0.417	1082	0.052	0.34	0.293	377596	742642	208313	309786	175230
Track_554	18	1	2	0	0	0	20216	35112	55328	2521	554	554	85803	68073	0	0.412	0.972	0.023	0.281	0.311	330198	506530	201594	337742	84854
Track_557	12	2	1	0	0	0	13832	35112	48944	1735	557	557	53553	19095	0	0.42	0.914	0.098	0.463	0.245	311268	463681	205358	282111	83764
Track_558	27	0	0	0	0	0	27664	36176	63840	0.718	558	558	50921	22186	0	0.381	1073	0.056	0.326	0.265	303596	453651	203885	295033	69947
Track_559	24	2	2	0	0	0	27664	36176	63840	2116	559	559	60409	22215	0	0.337	0.706	0.068	0.33	0.17	323760	560794	200282	319603	91548
Track_560	14	0	0	0	0	0	13832	35112	48944	1851	560	560	72056	25051	0	0.612	0.925	0.208	0.657	0.243	335051	515918	229374	315466	88365
Track_561	28	0	0	0	0	0	28728	35112	63840	0.948	561	561	74064	24195	0	0.335	0.711	0.062	0.327	0.19	399720	639799	206147	399223	113238
Track_562	23	1	1	0	0	0	24472	35112	59584	1212	562	562	88941	65867	0	0.465	1076	0.081	0.461	0.299	349845	487050	206134	324181	83570
Track_564	13	1	2	0	0	0	14896	37240	52136	0.464	564	564	71097	22650	0	0.484	1121	0.146	0.353	0.313	368861	529731	220655	356066	88061
Track_566	23	1	1	0	0	0	24472	37240	61712	2170	566	566	78447	29101	0	0.446	1166	0.015	0.344	0.344	404673	746642	207224	327304	171547
Track_567	24	1	2	0	0	0	26600	37240	63840	2283	567	567	86882	37768	0	0.283	0.674	0.084	0.242	0.184	463103	928726	200773	482621	191990
Track_568	23	1	1	0	0	0	24472	37240	61712	0.214	568	568	87522	48676	0	0.372	0.77	0.108	0.372	0.203	434958	1029178	203911	377110	217855
Track_572	11	0	0	0	0	0	10640	38304	48944	0.703	572	572	78206	26607	0	0.44	0.935	0.066	0.628	0.308	404448	615701	291640	358922	100419
Track_576	24	1	1	0	0	0	25536	38304	63840	1428	576	576	87400	45798	0	0.299	1042	0.04	0.255	0.224	364967	613303	210704	367003	123501
Track_577	23	1	2	0	0	0	25536	38304	63840	1515	577	577	89695	48147	0	0.472	1025	0.072	0.44	0.262	387524	700406	210479	348677	139795
Track_578	22	2	1	0	0	0	24472	39368	63840	1096	578	578	88144	40499	0	0.391	0.86	0.122	0.37	0.199	385853	862311	238768	358773	133589
Track_579	24	0	0	0	0	0	24472	39368	63840	1545	579	579	87203	39251	0	0.321	0.863	0.07	0.279	0.223	388048	787974	251415	357721	124860
Track_581	16	0	0	0	0	0	15960	38304	54264	1174	581	581	56833	19145	0	0.373	1051	0.005	0.343	0.328	356308	783746	210011	270339	194154
Track_583	22	0	0	0	0	0	22344	39368	61712	1063	583	583	55060	19046	0	0.325	0.735	0.035	0.247	0.224	351350	550891	219210	342334	85231
Track_584	22	1	2	0	0	0	24472	39368	63840	2097	584	584	88461	49556	0	0.425	1049	0.097	0.308	0.271	366137	620097	205856	391689	101567
Track_585	23	1	1	0	0	0	24472	39368	63840	0.726	585	585	46018	20796	0	0.339	1013	0.01	0.326	0.233	300811	393875	210103	285030	58142
Track_586	13	0	0	0	0	0	12768	39368	52136	1171	586	586	65993	19999	0	0.389	1059	0.05	0.303	0.318	365122	628891	210579	349858	125103
Track_588	23	1	2	0	0	0	25536	38304	63840	1647	588	588	49614	19939	0	0.25	0.933	0.041	0.21	0.182	384713	648794	225545	392232	109624
Track_589	22	0	0	0	0	0	22344	38304	60648	1672	589	589	56343	21818	0	0.325	0.844	0.072	0.286	0.215	429294	834498	227052	438067	178431
Track_591	20	2	2	0	0	0	23408	40432	63840	1924	591	591	60050	22207	0	0.346	1218	0.039	0.216	0.325	345414	652879	202729	333286	111849
Track_593	19	0	0	0	0	0	19152	40432	59584	0.611	593	593	90242	49390	0	0.488	1200	0.042	0.424	0.333	348335	599421	207674	324638	108940
Track_596	16	1	1	0	0	0	17024	41496	58520	1057	596	596	87101	54790	0	0.317	1241	0.02	0.255	0.295	414036	795192	211124	389469	127713
Track_599	17	2	2	0	0	0	20216	41496	61712	2948	599	599	48296	20041	0	0.422	1125	0.079	0.318	0.331	346767	512043	201689	358437	94840
Track_600	22	0	0	0	0	0	22344	41496	63840	2528	600	600	87625	58013	0	0.304	0.658	0.095	0.253	0.155	503366	843314	247482	460488	179712
Track_601	22	0	0	0	0	0	22344	41496	63840	4322	601	601	88763	58927	0	0.395	1184	0.136	0.365	0.267	464981	1024207	209108	422599	195218
Track_602	16	0	0	0	0	0	15960	41496	57456	1002	602	602	85389	68865	0	0.324	0.795	0.089	0.31	0.185	393065	605091	284225	384693	82521
Track_603	21	1	1	0	0	0	22344	41496	63840	1555	603	603	86589	71659	0	0.307	0.661	0.101	0.291	0.167	426357	806634	231312	396082	150141
Track_604	20	2	1	0	0	0	22344	41496	63840	0.994	604	604	86000	77739	0	0.388	0.965	0.097	0.342	0.233	382820	823202	210607	337441	163276
Track_605	19	1	1	0	0	0	20216	41496	61712	2368	605	605	79601	26854	0	0.489	1010	0.092	0.517	0.346	371491	676442	200390	334150	141625
Track_608	21	1	1	0	0	0	22344	41496	63840	0.476	608	608	80209	31162	0	0.338	0.935	0.028	0.341	0.244	418817	673582	201583	410275	126575
Track_609	10	1	1	0	0	0	10640	41496	52136	0.875	609	609	76498	27630	0	0.301	0.687	0.067	0.282	0.187	391972	526971	217227	411903	110019
Track_610	12	0	0	0	0	0	11704	41496	53200	1791	610	610	83376	36695	0	0.283	0.704	0.055	0.216	0.224	695900	855582	219355	746654	165316
Track_614	13	0	0	0	0	0	12768	42560	55328	3292	614	614	90264	56965	0	0.474	0.902	0.153	0.54	0.271	300994	530917	200168	279633	82370
Track_615	11	2	1	0	0	0	12768	42560	55328	0.72	615	615	47140	20164	0	0.378	0.949	0.076	0.258	0.311	280540	499468	208770	253458	79909
Track_617	17	0	0	0	0	0	17024	44688	61712	2141	617	617	84642	38319	0	0.39	0.799	0.181	0.309	0.2	470303	847569	230819	435138	164327
Track_619	16	2	2	0	0	0	19152	44688	63840	1978	619	619	89999	54312	0	0.352	0.984	0.032	0.29	0.274	286533	402022	222405	301755	46868
Track_622	19	1	1	0	0	0	20216	43624	63840	2318	622	622	84657	72747	0	0.37	1027	0.045	0.272	0.276	414024	699685	202933	406249	160450
Track_623	18	0	0	0	0	0	18088	45752	63840	0.955	623	623	65267	19707	0	0.358	1011	0.086	0.288	0.243	398931	638742	215438	412853	105093
Track_624	15	0	0	0	0	0	14896	44688	59584	1144	624	624	51458	19893	0	0.226	0.548	0.038	0.193	0.144	359894	629265	220745	330463	98802
Track_625	20	0	0	0	0	0	20216	43624	63840	0.772	625	625	53242	19640	0	0.372	1367	0.068	0.275	0.342	327743	511956	209646	319983	71800
Track_626	19	1	1	0	0	0	20216	43624	63840	1324	626	626	86089	76646	0	0.328	1241	0.045	0.239	0.312	439620	668604	292645	443317	104278
Track_627	17	0	0	0	0	0	17024	44688	61712	0.943	627	627	84158	75124	0	0.361	0.869	0.157	0.316	0.195	556997	827739	321625	555936	175975
Track_628	18	1	1	0	0	0	19152	44688	63840	2357	628	628	58965	19235	0	0.358	1380	0.037	0.203	0.385	397801	730877	239379	374176	111137
Track_629	17	0	0	0	0	0	17024	44688	61712	0.816	629	629	64553	22086	0	0.482	1302	0.107	0.392	0.328	322685	510785	207531	336562	83509
Track_630	17	1	2	0	0	0	19152	44688	63840	2445	630	630	54531	21724	0	0.379	1095	0.045	0.286	0.311	355656	564237	201970	354767	106461
Track_631	20	0	0	0	0	0	20216	43624	63840	1065	631	631	83647	77016	0	0.296	0.643	0.022	0.273	0.157	581625	970880	358850	541278	156827
Track_633	18	1	1	0	0	0	19152	44688	63840	0.264	633	633	58672	19907	0	0.309	0.864	0.078	0.287	0.228	311611	389288	230116	308765	38167
Track_635	19	1	1	0	0	0	20216	43624	63840	1273	635	635	72922	23632	0	0.258	0.814	0.054	0.241	0.173	358588	509080	200041	349201	103387
Track_637	17	1	1	0	0	0	18088	45752	63840	1916	637	637	69133	23819	0	0.377	0.88	0.058	0.309	0.3	280952	375253	214302	272514	39005
Track_640	20	0	0	0	0	0	20216	43624	63840	2972	640	640	75612	26263	0	0.368	0.941	0.021	0.298	0.261	376982	559721	209838	403786	99369
Track_641	14	1	1	0	0	0	14896	43624	58520	2647	641	641	84284	32865	0	0.461	1182	0.065	0.367	0.333	338816	766316	213964	277926	164836
Track_642	18	1	2	0	0	0	20216	43624	63840	4366	642	642	83935	30997	0	0.415	1196	0.111	0.293	0.331	369470	542387	200442	409257	108001
Track_647	11	1	2	0	0	0	12768	43624	56392	0.922	647	647	48826	19208	0	0.304	0.673	0.065	0.312	0.211	260265	384422	202781	244813	53485
Track_652	16	1	1	0	0	0	17024	46816	63840	2040	652	652	77913	28900	0	0.429	0.936	0.115	0.409	0.233	339314	563233	211772	289589	107179
Track_653	17	0	0	0	0	0	17024	46816	63840	0.809	653	653	80510	27686	0	0.235	0.382	0.119	0.235	0.079	548390	812649	248981	519289	168858
Track_654	14	0	0	0	0	0	13832	46816	60648	1743	654	654	75055	27997	0	0.274	1276	0.067	0.18	0.318	327683	481750	211253	331449	83180
Track_655	17	0	0	0	0	0	17024	46816	63840	0.818	655	655	82547	31958	0	0.391	1043	0.006	0.282	0.335	321691	477922	230083	318415	67530
Track_657	13	2	2	0	0	0	15960	46816	62776	1648	657	657	88072	38712	0	0.365	1210	0.093	0.285	0.329	338539	503800	216090	318153	79453
Track_659	12	1	2	0	0	0	13832	46816	60648	1708	659	659	87014	43461	0	0.358	0.849	0.027	0.339	0.271	295850	389912	222631	302956	56031
Track_661	12	0	0	0	0	0	11704	46816	58520	0.821	661	661	89521	60878	0	0.346	0.9	0.115	0.285	0.273	292642	413201	208964	291501	51080
Track_666	15	1	1	0	0	0	15960	47880	63840	1092	666	666	86336	72386	0	0.294	0.598	0.11	0.269	0.127	342550	701767	225193	285275	141230
Track_667	15	0	0	0	0	0	14896	47880	62776	1921	667	667	84955	73645	0	0.388	1020	0.077	0.356	0.278	360766	713736	233965	323666	126360
Track_669	15	1	1	0	0	0	15960	47880	63840	0.494	669	669	75070	24779	0	0.324	0.626	0.089	0.338	0.152	558300	902021	306340	570964	168329
Track_671	14	1	1	0	0	0	14896	48944	63840	1629	671	671	79047	30359	0	0.334	1311	0.067	0.186	0.344	341721	759060	201787	305005	147623
Track_676	13	2	1	0	0	0	14896	48944	63840	0.628	676	676	88638	42834	0	0.467	0.898	0.163	0.512	0.195	298601	408692	206953	275239	65967
Track_680	13	1	2	0	0	0	14896	48944	63840	2838	680	680	52628	19538	0	0.381	1153	0.08	0.196	0.359	319363	455686	214975	333706	72130
Track_683	15	0	0	0	0	0	14896	48944	63840	2664	683	683	85292	70346	0	0.316	0.944	0.014	0.273	0.281	410130	723117	234901	377323	138702
Track_684	13	1	1	0	0	0	13832	48944	62776	0.819	684	684	69066	23232	0	0.659	1383	0.169	0.644	0.396	292142	824924	206725	234092	159523
Track_686	13	0	0	0	0	0	12768	51072	63840	2462	686	686	89403	62287	0	0.565	1026	0.164	0.614	0.322	279035	352671	216629	279295	40649
Track_687	14	0	0	0	0	0	13832	50008	63840	1851	687	687	85255	69338	0	0.563	1257	0.106	0.369	0.434	344836	504070	221372	332169	87728
Track_688	11	1	1	0	0	0	11704	52136	63840	0.904	688	688	87575	68522	0	0.22	0.699	0.051	0.2	0.181	318002	502495	207920	262826	108163
Track_689	11	1	1	0	0	0	11704	52136	63840	0.937	689	689	63063	18943	0	0.397	0.755	0.055	0.382	0.211	348306	524035	214812	310275	102076
Track_690	11	0	0	0	0	0	10640	50008	60648	1038	690	690	51301	19232	0	0.372	1027	0.064	0.308	0.354	307381	408032	210421	308151	62524
Track_692	12	0	0	0	0	0	11704	52136	63840	0.547	692	692	86558	66449	0	0.371	0.849	0.035	0.249	0.29	357390	629845	204498	361069	117052
Track_694	12	1	2	0	0	0	13832	50008	63840	0.366	694	694	85635	80595	0	0.268	0.63	0.065	0.211	0.176	444494	645305	222903	438783	119917
Track_695	12	0	0	0	0	0	11704	52136	63840	2207	695	695	65516	19980	0	0.371	0.67	0.077	0.359	0.2	345481	473554	253165	350079	66357
Track_697	13	0	0	0	0	0	12768	51072	63840	3869	697	697	77145	25912	0	0.554	1137	0.028	0.54	0.324	364847	604036	238343	310215	124247
Track_700	11	1	2	0	0	0	12768	51072	63840	2649	700	700	81645	31067	0	0.278	0.514	0.054	0.282	0.131	331201	531525	205327	279226	110971
Track_701	12	0	0	0	0	0	11704	52136	63840	1080	701	701	87566	49658	0	0.401	1093	0.176	0.326	0.264	444525	764895	202219	460168	211419
Track_702	12	0	0	0	0	0	11704	52136	63840	1029	702	702	91322	49352	0	0.444	0.825	0.111	0.38	0.231	391851	694683	247951	354844	136777
Track_703	12	0	0	0	0	0	11704	52136	63840	0.757	703	703	90465	51355	0	0.355	0.722	0.088	0.361	0.206	444289	766015	208975	402470	171025
Track_704	12	0	0	0	0	0	11704	52136	63840	0.345	704	704	87410	47481	0	0.24	0.644	0.021	0.173	0.184	348621	535026	216595	386047	94084
Track_707	11	0	0	0	0	0	10640	53200	63840	1167	707	707	87266	58055	0	0.45	0.917	0.021	0.618	0.349	347616	554455	214490	345424	91030
Track_708	11	0	0	0	0	0	10640	53200	63840	0.471	708	708	88346	66761	0	0.391	0.862	0.047	0.441	0.3	404958	688902	256107	356411	148261
Track_710	11	0	0	0	0	0	10640	53200	63840	1448	710	710	83714	76352	0	0.339	0.705	0.087	0.297	0.204	513264	827799	288528	484515	157000
