# Supplementary material for: Epidermal PAR-6 and PKC-3 are essential for larval development of C. elegans and organize non-centrosomal microtubules
Source: eLife journal article supplement (doi:10.7554/elife.62067), 2020-12-10
Supplement: fig5-data1 [file P6_PKC3_nocako_maph1_bundle_density.xlsx]

## Sheet: Sheet1
	Time	Bundles	um	Bundles/um	Which side did i count			Time	Bundles	um	Bundles/um	Which side did i count				Bundles	um	Bundles/um	Which side did i count				Average		St dev
190605_P6deg_maph1_L3_A_24		43	90	0.477778	top		190605_P6deg_maph1_L3_C_10		82	90	0.911111	top		190905_PKC3AID_maph1_A_12		100	140	0.714286	top				P6deg	0.614923	0.205155
190605_P6deg_maph1_L3_A_11		52	70	0.742857	left		190605_P6deg_maph1_L3_C_19		51	70	0.728571	top		190905_PKC3AID_maph1_A_21		76	100	0.76	top				Control	0.866624	0.171267
190605_P6deg_maph1_L3_A_30		62	100	0.62	top		190605_P6deg_maph1_L3_C_4		73	70	1.04286	left		190905_PKC3AID_maph1_A_15		45	80	0.5625	top				PKC3 deg	0.655632	0.213342
190605_P6deg_maph1_L3_A_23		59	70	0.842857	left		190605_P6deg_maph1_L3_C_15		96	80	1.2	left		190905_PKC3AID_maph1_A_19		61	70	0.871429	top				Noca ko	0.56177	0.146086
190605_P6deg_maph1_L3_A_17		24	25	0.96	top		190605_P6deg_maph1_L3_C_3		74	70	1.05714	top		190905_PKC3AID_maph1_A_14		34	80	0.425	left				P6deg + nocako	0.524859	0.160197
190605_P6deg_maph1_L3_A_29		24	80	0.3	bottom		190605_P6deg_maph1_L3_C_13		34	50	0.68	top		190905_PKC3AID_maph1_A_17		86	80	1.075	left
190605_P6deg_maph1_L3_A_21		52	80	0.65	top		190605_P6deg_maph1_L3_C_12		64	70	0.914286	left		190905_PKC3AID_maph1_A_10		59	70	0.842857	top
190605_P6deg_maph1_L3_A_4		61	80	0.7625	left		190605_P6deg_maph1_L3_C_17		63	70	0.9	left		190905_PKC3AID_maph1_A_3		43	90	0.477778	top
190605_P6deg_maph1_L3_A_9		51	70	0.728571	top		190605_P6deg_maph1_L3_C_16		54	80	0.675	top		190905_PKC3AID_maph1_A_8		43	100	0.43	left
190605_P6deg_maph1_L3_A_19		67	70	0.957143	left		190605_P6deg_maph1_L3_C_9		64	70	0.914286	left		190905_PKC3AID_maph1_A_1		50	70	0.714286	top
190605_P6deg_maph1_L3_A_8		34	80	0.425	top		190605_P6deg_maph1_L3_C_7		49	70	0.7	top		190905_PKC3AID_maph1_A_11		37	50	0.74	top
190605_P6deg_maph1_L3_A_7		29	70	0.414286	top		190605_P6deg_maph1_L3_C_14		50	70	0.714286	top		190905_PKC3AID_maph1_A_7		34	70	0.485714	top
190605_P6deg_maph1_L3_A_6		30	70	0.428571	top		190605_P6deg_maph1_L3_C_18		58	70	0.828571	top		190905_PKC3AID_maph1_A_6		54	90	0.6	top
190605_P6deg_maph1_L3_A_2		22	70	0.314286	top									190905_PKC3AID_maph1_A_4		48	100	0.48	left
190605_P6deg_maph1_L3_A_1		42	70	0.6	top
								Time	Bundles	um	Bundles/um	Which side did i count
200326_nocako_maph1_1		57	140	0.407143	left		201029_P6aid_A_nocako_4		43	70	0.614286	bottom		weird worms
200326_nocako_maph1_4		39	100	0.39	left		201103_P6aid_A_nocako_9		36	60	0.6	bottom		201103_P6aid_maph1_A_nocako6
200320_nocako_maph1_2		79	100	0.79	top		201103_P6aid_A_nocako_7		39	70	0.557143	middle		201103_P6aid_maph1_A_nocako4
200526_nocako_maph1_21		55	80	0.6875	top		201103_P6aid_A_nocako_5		17	80	0.2125	middle
200526_nocako_maph1_20		49	70	0.7	left		201103_P6aid_A_nocako_4		60	80	0.75	right
200526_nocako_maph1_19		37	70	0.528571	top		201103_P6aid_A_nocako_1		30	60	0.5	right
200526_nocako_maph1_18		45	70	0.642857	bottom		201103_P6aid_A_nocako_2		91	150	0.606667	top + bottom
200526_nocako_maph1_17		56	80	0.7			201111_P6aid_A_maph1_nocako_7		20	70	0.285714
200526_nocako_maph1_16		52	80	0.65	left		201111_P6aid_A_maph1_nocako_3,5,6		108	200	0.54
200526_nocako_maph1_15		28	70	0.4	bottom		201111_P6aid_A_maph1_nocako_8		46	79	0.582278	top
200526_nocako_maph1_14		48	80	0.6	left
200526_nocako_maph1_13		29	80	0.3625	top
200526_nocako_maph1_11		40	90	0.444444	top
			80.6769
