# Supplementary material for: Epidermal PAR-6 and PKC-3 are essential for larval development of C. elegans and organize non-centrosomal microtubules
Source: eLife journal article supplement (doi:10.7554/elife.62067), 2020-12-10
Supplement: fig6-data1 [file 200311_P6aid_gip1 wholecell.xlsx]

## Sheet: ctrl 1
200526_gip1_C_7												Background corrected	200526_gip1_C_7
493.126	544.509	525.385	546.803	535.844	530.008	498.373	505.701	551.611	523.468	506.476	556.578		56.828	108.211
490.504	536.448	506.869	522.137	534.938	523.415	509.613	511.727	536.827	522.639	525.785	536.349		54.206	100.15	89.087	110.505			62.075	69.403
492.808	537.689	522.293	520.937	520.322	526.804	518.687	515.508	526.566	525.601	528.405	533.416		56.51	101.391	70.571	85.839	99.546		73.315	75.429	115.313	87.17
497.209	527.053	529.8	531.567	522.358	552.798	500.189	490.015	531.262	527.564	534.409	550.881		60.911	90.755	85.995	84.639	98.64		82.389	79.21	100.529	86.341	70.178	120.28	Average	Stdev
485.175	507.951	498.586	522.149	545.385	536.96	526.634	490.495	544.522	536.396	553.886	555.059		48.877	71.653	93.502	95.269	84.024	93.71	63.891	53.717	90.268	89.303	89.487	100.051	81.146	17.2587
485.182	530.811	481.252	526.151	516.788	533.943	511.827	500.321	497.604	531.979	554.91	563.673		48.884	94.513	62.288	85.851	86.06	87.117	90.336	54.197	94.964	91.266	92.107	97.118	82.0584	16.8587
496.096	529.771	522.189	525.8	513.487	544.357	533.148	505.803	497.653	533.002	600.913	588.122		59.798	93.473	44.954	89.853	109.087	90.506	75.529	64.023	108.224	100.098	98.111	114.583	87.3532	21.7889
482.721	511.672	493.718	524.842	512.347	512.29	530.038	517.767	506.887	525.564	589.104	555.175		46.423	75.374	85.891	89.502	80.49	116.5	96.85	69.505	61.306	95.681	117.588	118.761	87.8226	22.9162
490.998	506.777	497.581	509.926	555.235	486.925	507.719	526.652	496.963	547.444	604.135	562.675		54.7	70.479	57.42	88.544	77.189	100.662	93.74	81.469	61.355	96.704	118.612	127.375	85.6874	23.1853
484.221	503.382	501.619	514.228	540.749	507.975	503.336	533.286	504.055	533.413	553.851	533.97		47.923	67.084	61.283	73.628	76.049	97.645	71.421	90.354	70.589	89.266	164.615	151.824	88.4734	35.324
496.113	506.791	535.391	527.475	529.714	508.943	514.843	520.122	521.638	549.387	538.332	533.92		59.815	70.493	65.321	77.93	118.937	108.059	67.038	96.988	60.665	111.146	152.806	118.877	92.3396	29.8579
515.27	504.603	528.61	516.391	551.978	526.504	491.682	508.908	520.561	520.729	525.763	518.122		78.972	68.305	99.093	91.177	104.451	75.992	78.545	83.824	67.757	97.115	167.837	126.377	94.9537	28.4182
514.439	510.143	528.566	524.253	526.036	544.075	498.138	519.887	528.757	513.16	526.114	536.023		78.141	73.845	92.312	80.093	93.416	50.627	55.384	72.61	85.34	113.089	117.553	97.672	84.1735	20.3004
509.613	500.626	525.458	535.007	537.781	519.146	528.214	495.612	537.4	520.705	517.675	507.357		73.315	64.328	92.268	87.955	115.68	71.677	61.84	83.589	84.263	84.431	102.034	97.622	84.9168	15.7619
511.532	501.851	522.165	554.764	530.298	494.971	540.11	523.179	549.303	509.799	523.086	508.452		75.234	65.553	89.16	98.709	89.738	72.645	91.916	59.314	92.459	76.862	89.465	81.824	81.9066	12.055
512.11	519.186	552.828	532.084	524.848	498.044	547.691	494.346	556.591	514.598	529.339	536.364		75.812	82.888	85.867	118.466	101.483	90.206	103.812	86.881	101.102	84.407	89.816	99.725	93.3721	11.772
471.189	521.238	535.279	533.368	545.981	498.359	543.113	492.419	520.568	498.327	530.561	540.162		34.891	84.94	116.53	95.786	94	107.777	111.393	58.048	113.005	73.501	81.377	71.059	86.8589	24.7289
487.061	543.604	516.963	509.298	562.311	504.063	511.553	491.851	509.066	501.775	515.375	520.617		50.763	107.306	98.981	97.07	88.55	82.848	106.815	56.121	120.293	78.3	86.788	72.154	87.1658	20.7593
498.178	499.486	531.499	525.812	554.565	523.162	519.804	501.216	498.489	539.202	497.824	514.052		61.88	63.188	80.665	73	109.683	58.673	75.255	55.553	84.27	62.029	93.041	100.066	76.4419	17.5253
512.747	501.998	506.859	524.406	517.71	523.737	527.675	518.605	522.844	533.388	494.154	503.886		76.449	65.7	95.201	89.514	126.013	61.746	83.506	64.918	72.768	65.477	94.263	103.864	83.2849	19.3896
502.17	514.645	531.788	508.321	520.124	535.406	522.469	526.529	525.363	529.464	497.34	520.334		65.872	78.347	70.561	88.108	118.267	62.061	91.377	82.307	62.191	102.904	79.077	84.319	82.1159	16.7485
476.417	531.85	513.25	526.27	509.323	540.24	559.851	529.067	531.586	527.252	517.112	518.794		40.119	95.552	95.49	72.023	81.412	67.765	86.171	90.231	86.546	97.09	61.526	77.754	79.3066	16.8033
515.322	517.317	530.519	511.538	521.387	543.208	551.043	544.622	549.569	529.808	552.807	543.581		79.024	81.019	76.952	89.972	83.826	86.864	123.553	92.769	89.065	93.166	57.856	67.588	85.1378	15.9987
516.121	512.255	532.79	530.384	542.266	550.996	526.87	528.553	519.532	512.733	530.657	508.83		79.823	75.957	94.221	75.24	73.025	87.439	114.745	108.324	95.288	90.954	61.042	84.036	86.6745	15.2242
493.286	549.171	524.507	508.156	563.665	539.862	517.846	571.565	549.591	533.616	499.151	533.6		56.988	112.873	96.492	94.086	85.089	99.108	90.572	92.255	113.271	93.51	80.814	82.496	91.4628	14.9337
487.316	511.041	546.181	507.904	571.237	561.502	532.883	569.877	549.33	543.084	517.601	544.65		51.018	74.743	88.209	71.858	105.968	103.942	81.548	135.267	83.234	76.435	116.509	107.283	91.3345	23.0897
507.315	544.965	545.435	504.867	569.521	551.689	548.701	588.382	586.359	531.323	524.425	538.822		71.017	108.667	109.883	71.606	127.367	106.91	96.585	133.579	113.293	97.318	94.359	72.532	100.26	20.724
504.58	544.662	547.334	530.517	577.42	553.018	551.13	604.651	602.215	564.534	519.063	548.257		68.282	108.364	109.137	68.569	134.939	114.698	112.403	152.084	113.032	106.786	62.853	97.302	104.037	26.7279
536.336	559.141	563.636	535.392	584.802	576.687	563.287	593.418	572.116	618.549	534.388	587.465		100.038	122.843	111.036	94.219	133.223	103.564	114.832	168.353	150.061	95.025	81.303	108.352	115.237	24.9539
560.332	549.391	602.101	540.12	578.807	627.801	571.36	598.92	577.328	638.498	538.67	648.307		124.034	113.093	127.338	99.094	141.122	125.204	126.989	157.12	165.917	128.236	88.127	102.524	124.9	22.6921
578.865	532.269	642.73	565.191	652.345	700.541	549.413	615.205	602.628	640.186	556.124	695.117		142.567	95.971	165.803	103.822	148.504	115.391	135.062	162.622	135.818	182.251	82.765	111.959	131.878	30.4616
592.873	544.29	640.954	616.995	745.816	773.481	554.664	633.245	639.89	634.552	571.518	729.227		156.575	107.992	206.432	128.893	142.509	116.72	113.115	178.907	141.03	202.2	98.09	151.167	145.303	35.719
573.554	591.344	614.239	673.246	831.549	792.204	576.82	674.091	725.045	634.007	641.546	773.873		137.256	155.046	204.656	180.697	216.047	140.389	118.366	196.947	166.33	203.888	102.372	212.009	169.5	38.7272
547.613	626.916	657.528	707.044	856.132	725.28	632.35	690.185	727.641	631.411	633.708	764.722		111.315	190.618	177.941	236.948	309.518	191.503	140.522	237.793	203.592	198.254	119.826	258.819	198.054	57.7575
567.736	649.89	667.617	726.984	863.127	699.037	692.843	732.484	743.522	612.855	594.152	751.993		131.438	213.592	221.23	270.746	395.251	264.243	196.052	253.887	288.747	197.709	135.22	292.929	238.42	72.9326
572.444	636.279	686.791	689.582	794.742	693.943	696.185	704.798	703.495	620.993	606.329	700.833		136.146	199.981	231.319	290.686	419.834	337.183	256.545	296.186	291.343	195.113	205.248	337.575	266.43	78.1863
594.174	678.951	627.932	669.395	754.839	624.916	672.67	661.511	746.995	606.684	590.234	649.347		157.876	242.653	250.493	253.284	426.829	355.906	259.887	268.5	307.224	176.557	197.41	328.424	268.754	76.7763
560.733	696.249	571.67	643.453	739.65	612.534	676.738	644.889	671.142	571.68	571.347	662.46		124.435	259.951	191.634	233.097	358.444	288.982	236.372	225.213	267.197	184.695	157.854	315.695	236.964	66.719
573.722	628.333	560.204	632.706	687.221	556.376	661.448	606.51	614.429	556.433	557.169	591.181		137.424	192.035	135.372	207.155	318.541	262.739	240.44	208.591	310.697	170.386	170.031	264.535	218.162	61.8942
577.781	606.503	556.702	594.297	664.424	532.844	636.716	597	582.184	570.868	616.146	560.95		141.483	170.205	123.906	196.408	303.352	257.645	225.15	170.212	234.844	135.382	153.936	213.049	193.798	54.6557
554.645	561.661	554.913	593.351	640.12	543.494	610.322	607.515	548.214	564.746	592.515	544.55		118.347	125.363	120.404	157.999	250.923	188.618	200.418	160.702	178.131	120.135	135.049	226.162	165.188	44.5397
534.117	555.196	544.163	590.579	617.924	541.987	592.729	589.389	557.349	578.243	550.106	553.79		97.819	118.898	118.615	157.053	228.126	176.236	174.024	171.217	145.886	134.57	120.871	154.883	149.85	35.2541
534.31	524.096	569.964	585.921	576.978	537.49	591.562	576.846	550.094	546.293	577.151	570.208		98.012	87.798	107.865	154.281	203.822	120.078	156.431	153.091	111.916	128.448	179.848	124.652	135.52	34.5634
530.713	546.534	551.308	555.559	599.673	531.461	647.933	555.599	531.369	563.269	595.888	520.763		94.415	110.236	133.666	149.623	181.626	96.546	155.264	140.548	121.051	141.945	156.217	108.252	132.449	26.7997
547.208	559.435	543.685	516.973	597.41	538.522	635.081	585.994	514.73	539.523	614.663	533.868		110.91	123.137	115.01	119.261	140.68	107.196	211.635	119.301	113.796	109.995	113.808	117.492	125.185	28.5523
516.664	510.906	548.364	526.308	590.531	547.285	650.118	552.134	512.411	548.64	586.241	575.869		80.366	74.608	107.387	80.675	163.375	105.689	198.783	149.696	95.071	126.971	140.853	133.91	121.449	37.8812
509.424	528.048	551.733	537.843	589.619	541.718	654.098	553.589	522.547	535.705	603.714	580.858		73.126	91.75	112.066	90.01	161.112	101.192	213.82	115.836	78.432	103.225	159.59	84.465	115.385	42.001
517.246	553.145	549.33	533.669	522.617	531.041	671.928	540.014	501.484	553.202	568.448	561.776		80.948	116.847	115.435	101.545	154.233	95.163	217.8	117.291	76.113	112.342	178.365	97.57	121.971	41.6752
543.253	560.547	537.838	535.804	539.28	531.449	622.588	552.539	494.998	557.904	590.364	554.853		106.955	124.249	113.032	97.371	153.321	102.224	235.63	103.716	86.249	99.407	149.943	139.571	125.972	40.7045
525.956	544.174	516.269	514.175	528.408	554.014	596.829	503.456	540.917	547.776	582.545	574.709		89.658	107.876	101.54	99.506	86.319	110.987	186.29	116.241	65.186	116.904	167.416	144.56	116.04	34.5491
495.69	545.788	529.716	550.064	527.048	541.178	580.614	506.507	562.792	529.654	554.089	571.97		59.392	109.49	79.971	77.877	102.982	105.42	160.531	67.158	58.7	121.606	132.15	125.478	100.063	32.0025
515.68	563.451	528.318	553.236	503.562	551.077	575.836	529.844	529.832	542.209	564.507	563.916		79.382	127.153	93.418	113.766	92.11	94.743	144.316	70.209	104.619	111.478	154.066	118.555	108.651	24.9707
515.936	541.116	509.346	544.456	500.263	535.003	563.609	548.886	517.731	533.559	539.284	563.434		79.638	104.818	92.02	116.938	90.75	95.151	139.538	93.546	126.494	93.356	146.247	138.411	109.742	22.8109
517.273	546.797	523.984	577.675	508.641	523.804	560.32	536.343	521.611	520.9	537.714	552.365		80.975	110.499	73.048	108.158	67.264	117.716	127.311	112.588	93.534	105.911	117.791	135.672	104.206	21.3382
511.816	545.824	545.331	559.522	517.019	520.127	583.047	529.76	522.549	523.976	543.92	557.78		75.518	109.526	87.686	141.377	63.965	104.88	124.022	100.045	81.433	97.261	128.209	127.618	103.462	23.7796
516.377	547.282	568.809	555.408	511.649	530.11	559.481	518.936	516.026	524.744	517.522	551.259		80.079	110.984	109.033	123.224	72.343	114.779	146.749	93.462	85.313	84.602	102.986	127.136	104.224	22.0205
537.38	553.667	554.979	543.017	526.919	554.792	541.482	517.099	515.286	521.754	530.022	576.449		101.082	117.369	132.511	119.11	80.721	98.705	123.183	82.638	86.251	87.678	101.416	116.067	103.894	17.4676
520.882	548.042	544.954	551.979	542.376	523.99	524.127	551.989	507.83	506.323	561.568	546.312		84.584	111.744	118.681	106.719	75.351	87.506	105.184	80.801	79.728	88.446	107.622	121.482	97.3207	16.2557
567.609	539.155	563.201	547.244	548.479	556.741	525.574	551.578	514.371	528.12	541.023	565.177		131.311	102.857	108.656	115.681	90.621	83.829	87.829	115.691	78.988	85.456	81.224	114.961	99.7587	17.2729
559.081	542.474	578.564	523.218	538.472	561.63	530.949	592.221	517.908	528.513	535.524	593.991		122.783	106.176	126.903	110.946	106.078	93.812	89.276	115.28	71.532	70.025	93.724	140.151	103.891	21.3271
570.247	558.111	560.831	541.167	543.57	569.531	539.093	612.375	517.579	521.397	535.7	581.202		133.949	121.813	142.266	86.92	112.181	118.494	94.651	155.923	78.073	91.822	125.27	110.014	114.281	23.4933
560.581	544.839	550.236	524.109	524.162	585.987	537.622	602.858	506.713	565.115	560.301	559.46		124.283	108.541	124.533	104.869	102.174	87.692	102.795	176.077	81.61	92.215	104.725	128.879	111.533	25.0436
636.372	541.269	546.39	528.042	520.769	629.947	548.626	626.683	510.784	586.448	594.252	600.981		200.074	104.971	113.938	87.811	107.272	120.443	101.324	166.56	81.281	85.099	99.226	157.693	118.808	36.8559
686.489	531.487	580.829	531.14	516.805	612.339	535.038	643.817	535.166	601.825	603.526	618.163		250.191	95.189	110.092	91.744	87.864	125.332	112.328	190.385	70.415	128.817	99.402	144.904	125.555	50.2236
702.619	543.08	543.619	539.937	541.653	597.841	538.53	634.383	556.615	651.721	583.891	648.324		266.321	106.782	144.531	94.842	84.471	133.233	98.74	207.519	74.486	150.15	124.003	123.162	134.02	54.7856
706.941	541.878	535.136	536.627	563.281	594.059	541.763	737.392	560.134	659.347	614.621	591.414		270.643	105.58	107.321	103.639	80.507	149.689	102.232	198.085	98.868	165.527	157.954	164.683	142.061	54.1883
735.791	542.287	530.125	540.661	541.857	615.442	540.266	730.565	575.582	739.853	578.802	573.987		299.493	105.989	98.838	100.329	105.355	193.649	105.465	301.094	120.317	215.423	167.228	181.865	166.254	74.702
818.145	527.435	527.164	556.375	551.066	612.181	543.429	646.95	604.646	690.508	581.219	574.306		381.847	91.137	93.827	104.363	126.983	176.041	103.968	294.267	123.836	223.049	147.593	212.026	173.245	90.4462
899.106	524.194	526.392	565.612	533.126	613.474	569.632	642.621	562.153	706.768	626.236	579.012		462.808	87.896	90.866	120.077	105.559	161.543	107.131	210.652	139.284	303.555	178.323	155.116	176.901	108.528
															90.094	129.314	114.768	157.761	133.334	206.323	168.348	254.21	142.504	137.689
																	96.828	179.144			125.855	270.47	144.921	138.008
																		175.883					189.938	142.714
																		177.176

## Sheet: ctrl 2
200526_gip1_C_6										Background corrected	200526_gip1_C_6
419.068	451.495	475.444	509.078	492.304	490.345	511.822	516.709	475.307	469.829		19.666								75.905		Average	Stdev
443.778	452.167	473.234	503.651	492.236	475.576	497.01	495.578	489.259	510.633		44.376	52.093	76.042	109.676	92.902	90.943	112.42	117.307	89.857	115.769	90.1385	25.8671
452.994	452.76	495.061	482.087	482.686	461.255	487.488	526.914	453.202	515.171		53.592	52.765	73.832	104.249	92.834	76.174	97.608	96.176	53.8	97.038	79.8068	20.528
454.016	455.116	487.042	499.718	507.37	473.221	478.182	492.024	480.986	496.44		54.614	53.358	95.659	82.685	83.284	61.853	88.086	127.512	81.584	98.887	82.7522	22.492
478.213	465.348	493.837	497.204	530.322	499.289	496.18	492.428	480.119	498.289		78.811	55.714	87.64	100.316	107.968	73.819	78.78	92.622	80.717	100.451	85.6838	15.4173
460.418	449.219	482.45	470.005	501.9	461.288	462.333	481.186	477.752	499.853		61.016	65.946	94.435	97.802	130.92	99.887	96.778	93.026	78.35	103.439	92.1599	19.9894
467.867	470.666	454.59	479.934	513.439	482.671	497.832	502.134	479.015	502.841		68.465	49.817	83.048	70.603	102.498	61.886	62.931	81.784	79.613	81.004	74.1649	14.6483
453.1	471.426	448.222	487.666	520.07	478.569	493.484	490.415	459.014	480.406		53.698	71.264	55.188	80.532	114.037	83.269	98.43	102.732	59.612	87.705	80.6467	20.7646
433.499	462.507	489.205	492.183	514.786	474.607	470.767	483.757	474.427	487.107		34.097	72.024	48.82	88.264	120.668	79.167	94.082	91.013	75.025	105.834	80.8994	25.5374
429.103	462.536	459.384	487.7	485.126	446.338	483.56	495.122	487.312	505.236		29.701	63.105	89.803	92.781	115.384	75.205	71.365	84.355	87.91	64.537	77.4146	22.7993
434.002	494.72	463.983	462.411	484.836	464.809	462.369	475.146	464.765	463.939		34.6	63.134	59.982	88.298	85.724	46.936	84.158	95.72	65.363	66.527	69.0442	19.4396
449.714	509.956	468.337	483.702	505.008	480.798	479.238	459.073	464.223	465.929		50.312	95.318	64.581	63.009	85.434	65.407	62.967	75.744	64.821	77.956	70.5549	13.0625
446.704	484.839	469.741	494.48	474.585	481.078	510.074	487.306	464.759	477.358		47.302	110.554	68.935	84.3	105.606	81.396	79.836	59.671	65.357	67.155	77.0112	19.7333
462.99	485.926	470.15	465.293	479.15	474.27	505.404	485.975	478.535	466.557		63.588	85.437	70.339	95.078	75.183	81.676	110.672	87.904	79.133	68.527	81.7537	13.9462
454.336	473.462	480.413	468.874	488.802	490.672	505.259	488.756	490.179	467.929		54.934	86.524	70.748	65.891	79.748	74.868	106.002	86.573	90.777	51.721	76.7786	16.711
455.908	481.635	461.073	479.132	487.85	484.354	466.86	467.009	487.468	451.123		56.506	74.06	81.011	69.472	89.4	91.27	105.857	89.354	88.066	54.058	79.9054	16.3589
457.588	465.465	444.363	467.615	507.555	529.323	475.064	433.915	482.828	453.46		58.186	82.233	61.671	79.73	88.448	84.952	67.458	67.607	83.426	51.146	72.4857	12.9241
456.421	492.387	449.024	481.139	536.341	522.386	462.272	469.46	481.091	450.548		57.019	66.063	44.961	68.213	108.153	129.921	75.662	34.513	81.689	64.794	73.0988	28.3224
449.755	511.329	443.498	466.393	527.78	514.371	485.997	483.146	490.308	464.196		50.353	92.985	49.622	81.737	136.939	122.984	62.87	70.058	90.906	74.338	83.2792	28.8652
450.424	497.257	446.667	466.016	524.172	505.402	507.358	474.549	512.577	473.74		51.022	111.927	44.096	66.991	128.378	114.969	86.595	83.744	113.175	101.786	90.2683	28.7885
443.517	508.888	455.243	466.203	538.722	531.195	500.422	474.575	489.714	501.188		44.115	97.855	47.265	66.614	124.77	106	107.956	75.147	90.312	78.006	83.804	26.475
469.562	499.101	432.364	514.712	504.071	532.934	478.04	470.557	470.389	477.408		70.16	109.486	55.841	66.801	139.32	131.793	101.02	75.173	70.987	64.544	88.5125	29.7884
459.575	502.257	452.952	503.948	507.837	515.02	466.692	515.417	466.702	463.946		60.173	99.699	32.962	115.31	104.669	133.532	78.638	71.155	67.3	94.293	85.7731	29.4904
477.825	510.962	457.014	458.227	532.148	504.423	516.013	467.631	494.929	493.695		78.423	102.855	53.55	104.546	108.435	115.618	67.29	116.015	95.527	117.228	95.9487	22.2265
464.257	496.843	501.598	496.67	504.37	557.408	527.103	458.923	499.851	516.63		64.855	111.56	57.612	58.825	132.746	105.021	116.611	68.229	100.449	116.635	93.2543	28.0191
454.146	489.313	494.791	487.178	510.551	526.947	505.101	464.645	501.976	516.037		54.744	97.441	102.196	97.268	104.968	158.006	127.701	59.521	102.574	101.616	100.604	29.5669
477.776	479.637	532.281	518.18	538.395	539.009	506.557	544.841	511.575	501.018		78.374	89.911	95.389	87.776	111.149	127.545	105.699	65.243	112.173	156.471	102.973	26.0608
459.119	499.045	617.549	610.587	603.393	585.125	592.492	640.095	564.083	555.873		59.717	80.235	132.879	118.778	138.993	139.607	107.155	145.439	164.681	162.762	125.025	34.1768
479.402	492.101	625.177	619.974	653.973	588.073	634.071	709.333	636.504	562.164		80	99.643	218.147	211.185	203.991	185.723	193.09	240.693	237.102	198.237	186.781	54.2439
512.537	517.185	667.325	649.05	691.265	601.15	732.423	747.872	690.85	597.639		113.135	92.699	225.775	220.572	254.571	188.671	234.669	309.931	291.448	247.723	217.919	69.8958
671.99	577.157	692.748	640.655	731.3	603.633	739.291	776.821	699.225	647.125		272.588	117.783	267.923	249.648	291.863	201.748	333.021	348.47	299.823	264.124	264.699	66.2518
711.565	556.85	729.305	640.136	722.149	615.887	714.379	669.222	722.084	663.526		312.163	177.755	293.346	241.253	331.898	204.231	339.889	377.419	322.682	278.5	287.914	63.1376
792.86	533.002	737.998	609.58	733.81	582.133	695.999	623.925	669.395	677.902		393.458	157.448	329.903	240.734	322.747	216.485	314.977	269.82	269.993	250.603	276.617	66.6351
762.373	541.454	655.61	571.478	718.887	612.106	660.768	657.065	693.046	650.005		362.971	133.6	338.596	210.178	334.408	182.731	296.597	224.523	293.644	174.62	255.187	79.9545
685.767	521.493	619.874	531.071	689.571	594.846	642.116	596.735	656.458	574.022		286.365	142.052	256.208	172.076	319.485	212.704	261.366	257.663	257.056	120.407	228.538	64.7482
672.768	516.588	553.934	516.744	678.677	603.276	597.684	565.257	586.213	519.809		273.366	122.091	220.472	131.669	290.169	195.444	242.714	197.333	186.811	91.362	195.143	65.2037
613.008	501.609	542.857	497.634	658.367	551.192	531.941	570.489	552.048	490.764		213.606	117.186	154.532	117.342	279.275	203.874	198.282	165.855	152.646	84.447	168.704	56.9719
557.137	473.861	532.726	512.518	585.83	529.918	566.948	583.14	535.743	483.849		157.735	102.207	143.455	98.232	258.965	151.79	132.539	171.087	136.341	58.187	141.054	53.2382
529.828	493.552	522.199	509.9	588.638	543.619	531.862	588.247	535.716	457.589		130.426	74.459	133.324	113.116	186.428	130.516	167.546	183.738	136.314	108.099	136.397	34.9179
511.406	468.822	545.074	507.086	605.504	520.915	527.591	575.327	526.594	507.501		112.004	94.15	122.797	110.498	189.236	144.217	132.46	188.845	127.192	50.002	127.14	41.5624
500.312	467.866	526.374	464.398	555.343	524.972	504.596	534.43	515.603	449.404		100.91	69.42	145.672	107.684	206.102	121.513	128.189	175.925	116.201	58.388	123	44.8014
476.212	489.647	510.142	478.268	498.568	508.322	505.377	540.917	517.901	457.79		76.81	68.464	126.972	64.996	155.941	125.57	105.194	135.028	118.499	52.857	103.033	34.9522
474.576	498.822	494.958	477.192	517.518	488.585	495.985	525.873	493.572	452.259		75.174	90.245	110.74	78.866	99.166	108.92	105.975	141.515	94.17	65.022	96.9793	21.8051
470.99	485.854	508.685	461.652	499.079	490.696	505.011	511.808	499.879	464.424		71.588	99.42	95.556	77.79	118.116	89.183	96.583	126.471	100.477	59.474	93.4658	20.2589
457.711	503.81	479.714	478.136	505.058	478.793	466.737	497.338	492.178	458.876		58.309	86.452	109.283	62.25	99.677	91.294	105.609	112.406	92.776	68.716	88.6772	19.5591
468.456	506.795	461.942	460.749	506.932	469.662	473.386	486.531	513.431	468.118		69.054	104.408	80.312	78.734	105.656	79.391	67.335	97.936	114.029	53.509	85.0364	19.6188
449.575	520.38	483.407	464.493	527.346	464.845	509.845	487.73	463.69	452.911		50.173	107.393	62.54	61.347	107.53	70.26	73.984	87.129	64.288	75.742	76.0386	19.2662
465.081	526.685	461.165	466.889	498.027	488.142	515.224	462.423	498.718	475.144		65.679	120.978	84.005	65.091	127.944	65.443	110.443	88.328	99.316	78.311	90.5538	23.3129
495.417	514.078	481.416	464.088	486.008	475.464	498.565	481.326	493.281	477.713		96.015	127.283	61.763	67.487	98.625	88.74	115.822	63.021	93.879	92.088	90.4723	21.6491
477.584	521.771	499.184	504.042	467.098	473.364	525.577	472.437	498.319	491.49		78.182	114.676	82.014	64.686	86.606	76.062	99.163	81.924	98.917	78.149	86.0379	14.4187
483.029	511.006	464.124	512.381	489.211	471.405	542.383	480.376	500.146	477.551		83.627	122.369	99.782	104.64	67.696	73.962	126.175	73.035	100.744	86.517	93.8547	20.3538
491.145	511.665	450.674	511.851	476.761	490.705	550.698	494.311	509.336	485.919		91.743	111.604	64.722	112.979	89.809	72.003	142.981	80.974	109.934	93.289	97.0038	23.014
514.083	481.38	456.558	499.826	472.632	469.512	580.791	498.51	495.233	492.691		114.681	112.263	51.272	112.449	77.359	91.303	151.296	94.909	95.831	119.849	102.121	26.8889
487.064	527.292	449.34	526.493	454.749	456.979	588.387	518.525	506.344	519.251		87.662	81.978	57.156	100.424	73.23	70.11	181.389	99.108	106.942	132.043	99.0042	35.921
476.31	513.097	458.614	499.953	478.361	472.127	587.35	525.936	508.644	531.445		76.908	127.89	49.938	127.091	55.347	57.577	188.985	119.123	109.242	100.526	101.263	43.0743
473.844	496.384	458.434	470.238	483.926	478.492	587.036	536.231	532.716	499.928		74.442	113.695	59.212	100.551	78.959	72.725	187.948	126.534	133.314	92.123	103.95	38.2188
468.581	487.305	451.642	472.619	510.578	481.564	569.552	521.891	482.001	491.525		69.179	96.982	59.032	70.836	84.524	79.09	187.634	136.829	82.599	100.031	96.6736	38.5759
456.995	491.805	443.698	486.789	522.749	490.558	571.312	517.778	511.299	499.433		57.593	87.903	52.24	73.217	111.176	82.162	170.15	122.489	111.897	107.609	97.6436	34.8916
457.906	494.537	458.364	472.844	521.514	489.995	557.425	546.826	534.88	507.011		58.504	92.403	44.296	87.387	123.347	91.156	171.91	118.376	135.478	139.559	106.242	38.884
485.385	494.445	501.757	506.706	521.32	483.471	558.361	519.205	538.066	538.961		85.983	95.135	58.962	73.442	122.112	90.593	158.023	147.424	138.664	94.491	106.483	33.1791
469.646	487.127	487.893	557.763	506.037	489.714	555.757	522.119	531.358	493.893		70.244	95.043	102.355	107.304	121.918	84.069	158.959	119.803	131.956	67.922	105.957	28.415
									467.324			87.725	88.491	158.361	106.635	90.312	156.355	122.717		56.694
									456.096											125.177
									524.579											75.839
									475.241											77.019
									476.421

## Sheet: ctrl 3
200526_gip1_C_5										Background corrected	200526_gip1_C_5
529.373	528.063	606.261	597.46	571.247	519.248	528.926	549.048	503.921	548.006									112.583
520.432	550.216	561.081	568.194	550.028	547.575	527.737	526.216	493.99	542.268				169.796			82.783	92.461	89.751
518.534	531.992	545.324	578.559	568.55	532.894	533.842	520.6	534.044	520.192		92.908		124.616		134.782	111.11	91.272	84.135		111.541
518.604	525.96	528.917	587.21	575.436	553.459	561.945	527.306	534.489	522.624		83.967		108.859		113.563	96.429	97.377	90.841		105.803	Average	Stdev
519.094	517.549	530.133	564.018	627.525	529.625	561.291	508.826	529.254	536.572		82.069	91.598	92.452	160.995	132.085	116.994	125.48	72.361	67.456	83.727	102.522	30.1131
540.421	530.965	530.668	576.539	602.124	532.881	548.446	513.124	491.133	563.015		82.139	113.751	93.668	131.729	138.971	93.16	124.826	76.659	57.525	86.159	99.8587	26.4094
545	533.592	577.625	583.291	564.67	546.206	554.809	483.539	509.953	521.395		82.629	95.527	94.203	142.094	191.06	96.416	111.981	47.074	97.579	100.107	105.867	38.0619
558.377	539.833	544.931	581.186	545.645	553.595	562.215	497.299	511.452	529.546		103.956	89.495	141.16	150.745	165.659	109.741	118.344	60.834	98.024	126.55	116.451	31.0451
606.569	542.182	545.565	585.684	577.055	551.201	547.675	505.963	519.764	552.727		108.535	81.084	108.466	127.553	128.205	117.13	125.75	69.498	92.789	84.93	104.394	21.1606
597.787	528.339	538.059	572.465	581.081	530.953	530.828	495.356	527.226	545.671		121.912	94.5	109.1	140.074	109.18	114.736	111.21	58.891	54.668	93.081	100.735	26.695
559.176	518.037	555.728	568.398	574.842	528.142	544.989	516.614	530.745	546.148		170.104	97.127	101.594	146.826	140.59	94.488	94.363	80.149	73.488	116.262	111.499	31.388
558.829	522.475	539.476	560.786	580.342	568.625	525.005	506.165	522.853	559.751		161.322	103.368	119.263	144.721	144.616	91.677	108.524	69.7	74.987	109.206	112.738	30.3335
562.994	515.043	555.701	561.619	568.662	584.55	551.453	504.513	548.016	551.81		122.711	105.717	103.011	149.219	138.377	132.16	88.54	68.048	83.299	109.683	110.077	25.8128
541.397	510.296	550.322	553.961	545.299	588.27	586.661	485.993	520.854	528.544		122.364	91.874	119.236	136	143.877	148.085	114.988	49.528	90.761	123.286	114	29.6447
535.419	524.333	533.448	573.233	566.738	589.833	560.901	518.594	549.065	516.074		126.529	81.572	113.857	131.933	132.197	151.805	150.196	82.129	94.28	115.345	117.984	25.4915
511.658	531.942	520.45	568.266	581.256	593.325	568.468	544.629	582.055	524.19		104.932	86.01	96.983	124.321	108.834	153.368	124.436	108.164	86.388	92.079	108.551	20.8895
543.406	541.363	529.696	551.089	578.169	574.957	581.558	519.269	621.514	550.139		98.954	78.578	83.985	125.154	130.273	156.86	132.003	82.804	111.551	79.609	107.977	27.3485
522.325	550.782	543.209	532.27	550.07	555.533	584.388	508.163	599.857	546.513		75.193	73.831	93.231	117.496	144.791	138.492	145.093	71.698	84.389	87.725	103.194	30.3072
515.566	540.51	539.768	550.13	527.733	505.12	557.918	505.869	561.108	545.726		106.941	87.868	106.744	136.768	141.704	119.068	147.923	69.404	112.6	113.674	114.269	24.1243
495.46	569.667	548.419	558.072	519.931	514.257	561.464	524.4	579.113	524.283		85.86	95.477	103.303	131.801	113.605	68.655	121.453	87.935	145.59	110.048	106.373	23.0683
526.101	572.228	528.454	580.536	550.894	507.256	563.365	516.537	580.84	543.259		79.101	104.898	111.954	114.624	91.268	77.792	124.999	80.072	185.049	109.261	107.902	31.8045
527.376	582.776	543.221	616.556	547.774	511.893	552.048	496.88	612.989	538.62		58.995	114.317	91.989	95.805	83.466	70.791	126.9	60.415	163.392	87.818	95.3888	32.2139
530.893	586.328	530.306	623.074	545.714	520.807	543.758	503.831	546.474	556.761		89.636	104.045	106.756	113.665	114.429	75.428	115.583	67.366	124.643	106.794	101.835	18.5464
530.093	593.505	543.793	632.679	554.306	511.876	529.577	504.086	555.44	540.86		90.911	133.202	93.841	121.607	111.309	84.342	107.293	67.621	142.648	102.155	105.493	22.8186
525.466	622.449	547.552	694.797	538.633	501.039	532.608	477.316	613.404	573.99		94.428	135.763	107.328	144.071	109.249	75.411	93.112	40.851	144.375	120.296	106.488	32.4932
526.485	696.843	565.648	784.455	611.448	538.169	517.517	499.551	619.244	563.59		93.628	146.311	111.087	180.091	117.841	64.574	96.143	63.086	176.524	104.395	115.368	41.0787
567.804	700.869	570.018	780.539	666.148	534.079	537.08	533.367	676.025	607.48		89.001	149.863	129.183	186.609	102.168	101.704	81.052	96.902	110.009	137.525	118.402	32.4181
722.427	699.992	600.038	765.009	713.136	578.346	591.791	553.985	742.219	643.782		90.02	157.04	133.553	196.214	174.983	97.614	100.615	117.52	118.975	127.125	131.366	34.8476
874.738	708.01	638.834	766.085	711.167	692.846	712.667	606.105	707.033	652.046		131.339	185.984	163.573	258.332	229.683	141.881	155.326	169.64	176.939	171.015	178.371	38.7451
929.03	661.467	645.017	709.955	731.603	742.489	801.884	652.48	686.979	672.907		285.962	260.378	202.369	347.99	276.671	256.381	276.202	216.015	182.779	207.317	251.206	49.6558
886.349	628.87	665.443	620.129	667.697	761.59	842.168	751.712	661.513	667.112		438.273	264.404	208.552	344.074	274.702	306.024	365.419	315.247	239.56	215.581	297.184	71.9416
799.311	613.442	656.624	602.998	590.842	734.338	831.971	828.865	640.148	647.998		492.565	263.527	228.978	328.544	295.138	325.125	405.703	392.4	305.754	236.442	327.418	82.4565
704.571	605.042	644.882	586.317	568.534	658.475	749.251	798.489	597.113	580.539		449.884	271.545	220.159	329.62	231.232	297.873	395.506	362.024	270.568	230.647	305.906	77.1406
663.818	589.721	584.688	576.8	565.208	647.834	704.769	743.443	581.963	548.787		362.846	225.002	208.417	273.49	154.377	222.01	312.786	306.978	250.514	211.533	252.795	61.606
627.712	556.142	553.026	564.634	561.314	601.96	645.767	666.801	576.556	544.236		268.106	192.405	148.223	183.664	132.069	211.369	268.304	230.336	225.048	144.074	200.36	49.1339
591.574	581.1	538.396	530.185	538.743	593.655	574.32	585.279	544.678	537.232		227.353	176.977	116.561	166.533	128.743	165.495	209.302	148.814	203.683	112.322	165.578	39.7038
579.527	539.151	543.147	541.058	557.83	566.86	582.02	575.592	603.04	544.348		191.247	168.577	101.931	149.852	124.849	157.19	137.855	139.127	160.648	107.771	143.905	27.5524
569.529	516.122	535.705	544.762	545.399	563.651	578.819	552.414	614.765	527.952		155.109	153.256	106.682	140.335	102.278	130.395	145.555	115.949	145.498	100.767	129.582	21.4033
548.788	503.058	524.322	535.811	572.39	547.212	590.132	544.176	569.295	541.631		143.062	119.677	99.24	128.169	121.365	127.186	142.354	107.711	140.091	107.883	123.674	15.4539
591.029	514.994	526.857	540.674	590.66	554.081	582.393	562.005	542.601	552.395		133.064	144.635	87.857	93.72	108.934	110.747	153.667	125.54	108.213	91.487	115.786	22.7254
588.363	514.317	560.639	536.547	565.039	514.31	605.583	652.403	537.554	540.551		112.323	102.686	90.392	104.593	135.925	117.616	145.928	215.938	166.575	105.166	129.714	38.0847
570.432	532.126	540.088	551.836	592.395	543.078	616.801	660.697	591.302	528.438		154.564	79.657	124.174	108.297	154.195	77.845	169.118	224.232	178.3	115.93	138.631	46.1207
554.007	545.369	534.004	558.026	625.279	565.23	592.982	655.166	612.81	549.631		151.898	66.593	103.623	99.346	128.574	106.613	180.336	218.701	132.83	104.086	129.26	44.4222
560.265	548.027	535.037	546.012	607.736	565.186	563.723	628.239	605.682	589.722		133.967	78.529	97.539	104.209	155.93	128.765	156.517	191.774	106.136	91.973	124.534	35.424
575.28	534.759	582.596	570.335	667.571	611.589	551.551	610.215	585.086	623.805		117.542	77.852	98.572	100.082	188.814	128.721	127.258	173.75	101.089	113.166	122.685	34.5186
542.137	537.485	639.655	586.634	659.63	574.935	560.504	561.57	614.083	633.312		123.8	95.661	146.131	115.371	171.271	175.124	115.086	125.105	154.837	153.257	137.564	26.3803
544.73	541.36	633.146	557.083	630.284	592.442	606.813	587.955	612.238	670.618		138.815	108.904	203.19	121.561	231.106	138.47	124.039	151.49	176.345	187.34	158.126	39.8152
567.938	532.425	678.487	603.104	571.675	674.086	587.948	579.478	600.803	668.377		105.672	111.562	196.681	109.547	223.165	155.977	170.348	143.013	169.217	196.847	158.203	40.8259
581.831	528.738	703.138	593.7	579.667	644.961	595.065	584.662	574.743	605.563		108.265	98.294	242.022	133.87	193.819	237.621	151.483	148.197	148.621	234.153	169.635	53.7226
596.635	526.811	654.219	596.056	580.912	600.566	648.762	561.927	549.974	577.726		131.473	101.02	266.673	150.169	135.21	208.496	158.6	125.462	177.618	231.912	168.663	52.3457
595.608	525.564	616.143	605.167	564.603	582.749	626.009	603.417	533.665	563.265		145.366	104.895	217.754	120.618	143.202	164.101	212.297	166.952	175.773	169.098	162.006	35.7628
586.37	526.46	586.764	603.926	561.808	566.962	629.013	567.638	597.125	534.672		160.17	95.96	179.678	166.639	144.447	146.284	189.544	131.173	164.338	141.261	151.949	26.642
556.451	518.949	545.566	616.716	560.477	572.5	640.787	536.35	633.862	530.285		159.143	92.273	150.299	157.235	128.138	130.497	192.548	99.885	138.278	126.8	137.51	29.3715
556.948	518.544	539.759	596.081	553.975	583.034	619.701	526.68	658.444	556.179		149.905	90.346	109.101	159.591	125.343	136.035	204.322	90.215	113.509	98.207	127.657	36.0149
521.903	514.256	550.75	566.213	529.615	549.831	609.729	563.543	615.658	568.315		119.986	89.099	103.294	168.702	124.012	146.569	183.236	127.078	97.2	93.82	125.3	32.1474
529.63	537.575	565.19	553.815	537.947	534.612	608.567	535.584	636.762	547.658		120.483	89.995	114.285	167.461	117.51	113.366	173.264	99.119	160.66	119.714	127.586	29.0343
528.293	522.151	555.213	580.065	560.289	517.772	591.237	537.876	646.401	526.655		85.438	82.484	128.725	180.251	93.15	98.147	172.102	101.411	197.397	131.85	127.096	42.4188
542.793	520.772	528.612	595.704	528.844	550.294	566.604	531.957	577.837	558.589		93.165	82.079	118.748	159.616	101.482	81.307	154.772	95.492	221.979	111.193	121.983	44.4933
544.885	506.706	551.159	590.025	596.375	582.501	586.817	538.145	582.136	549.817		91.828	77.791	92.147	129.748	123.824	113.829	130.139	101.68	179.193	90.19	113.037	29.5236
											106.328	101.11	114.694	117.35	92.379	146.036	150.352		200.297	122.124
											108.42	85.686		143.6	159.91				209.936	113.352
												84.307		159.239					141.372
												70.241		153.56					145.671

## Sheet: ctrl 4
200526_gip1_C_4										Background corrected	200526_gip1_C_4
476.066	493.25	527.4	529.05	488.25	472.2	566.75	497.8	512.05	501.4				98.631					69.031	83.281	72.631
503.057	507.192	533.9	519.7	503.6	490.3	537.6	530.85	555.8	502.6			64.481	105.131	100.281	59.481	43.431	137.981	102.081	127.031	73.831
492.044	519.741	532.15	536.35	524.45	492.25	491.1	537	541.45	510.1			78.423	103.381	90.931	74.831	61.531	108.831	108.231	112.681	81.331	Average	Stdev
500.971	523.469	490.05	567.9	518.7	488.1	516.9	522.7	562.3	534.35		47.297	90.972	61.281	107.581	95.681	63.481	62.331	93.931	133.531	105.581	86.1667	26.8032
490.617	511.135	517.2	587.75	490.7	481.65	456.8	580.45	586.8	494.35		74.288	94.7	88.431	139.131	89.931	59.331	88.131	151.681	158.031	65.581	100.924	35.6918
500.36	484.976	510.1	601.9	485.35	472.15	471.5	555.7	603.55	484.05		63.275	82.366	81.331	158.981	61.931	52.881	28.031	126.931	174.781	55.281	88.5789	48.7041
480.986	501.325	486.7	580.05	454.05	514.8	515.4	568.5	620.5	506.9		72.202	56.207	57.931	173.131	56.581	43.381	42.731	139.731	191.731	78.131	91.1757	55.6496
496.381	505.178	531.05	601.65	477.7	493.4	461.1	597.65	596.05	516		61.848	72.556	102.281	151.281	25.281	86.031	86.631	168.881	167.281	87.231	100.93	47.4063
490.026	511.868	497.2	525.6	473.45	470.45	492.25	581	564.5	504.8		71.591	76.409	68.431	172.881	48.931	64.631	32.331	152.231	135.731	76.031	89.9198	46.7537
510.474	516.239	489.5	602.1	439.45	479.3	481.8	563.65	570.6	489		52.217	83.099	60.731	96.831	44.681	41.681	63.481	134.881	141.831	60.231	77.9664	35.9153
507.193	525.176	505.1	550.85	514.9	495.25	495	599.75	603.85	513.65		67.612	87.47	76.331	173.331	10.681	50.531	53.031	170.981	175.081	84.881	94.993	58.1455
528.62	524.161	474.65	522	476.5	485.3	501.6	571	578	528.2		61.257	96.407	45.881	122.081	86.131	66.481	66.231	142.231	149.231	99.431	93.5362	35.2393
517.327	511.678	522.3	518.55	466.4	533.05	479.5	586.65	586.7	520.35		81.705	95.392	93.531	93.231	47.731	56.531	72.831	157.881	157.931	91.581	94.8345	36.9889
538.859	530.898	459.75	482.4	486.55	545.05	475.25	525.35	641.95	500.7		78.424	82.909	30.981	89.781	37.631	104.281	50.731	96.581	213.181	71.931	85.6431	51.1095
552.765	544.858	500.85	485.85	479.1	536.6	473.5	573.65	604.75	519.2		99.851	102.129	72.081	53.631	57.781	116.281	46.481	144.881	175.981	90.431	95.9528	41.5814
542.542	523.202	487.35	524.1	482.75	549.5	444.7	513.85	625.25	518.95		88.558	116.089	58.581	57.081	50.331	107.831	44.731	85.081	196.481	90.181	89.4945	44.7887
549.057	531.99	512.2	527.3	479.95	553.2	485.7	574.5	618	510.95		110.09	94.433	83.431	95.331	53.981	120.731	15.931	145.731	189.231	82.181	99.1071	47.618
590.526	536.966	477.95	476.45	509.3	581.3	488.7	507.8	595.8	529.75		123.996	103.221	49.181	98.531	51.181	124.431	56.931	79.031	167.031	100.981	95.4515	37.6135
604.701	530.862	495.55	479.75	497.5	556.6	482.5	564.1	563.25	507		113.773	108.197	66.781	47.681	80.531	152.531	59.931	135.331	134.481	78.231	97.7468	36.0587
586.767	563.947	494.3	514.3	506.3	562.4	467.45	522.65	566.2	494.35		120.288	102.093	65.531	50.981	68.731	127.831	53.731	93.881	137.431	65.581	88.6079	32.0165
619.585	551.489	525.25	504.6	508.55	549.6	488.85	534	544	551.2		161.757	135.178	96.481	85.531	77.531	133.631	38.681	105.231	115.231	122.431	107.168	34.8293
604.266	572.564	512.75	489.7	519.35	569.9	467.55	509.3	548	514.6		175.932	122.72	83.981	75.831	79.781	120.831	60.081	80.531	119.231	85.831	100.475	34.1667
600.827	550.363	525.1	499	515.5	577.65	509.35	539.3	536.55	498.7		157.998	143.795	96.331	60.931	90.581	141.131	38.781	110.531	107.781	69.931	101.779	38.5772
611.946	575.499	511.4	535	514.9	573.15	485.55	518.6	555.45	518.65		190.816	121.594	82.631	70.231	86.731	148.881	80.581	89.831	126.681	89.881	108.786	37.9912
614.101	552.771	504.45	511.9	551.7	552.6	497.8	506.35	521.1	498.95		175.497	146.73	75.681	106.231	86.131	144.381	56.781	77.581	92.331	70.181	103.153	39.2921
629.505	569.757	535.95	517.6	521.85	614.5	526.3	558.8	518	503.9		172.058	124.002	107.181	83.131	122.931	123.831	69.031	130.031	89.231	75.131	109.656	31.3783
572.444	555.257	519.85	544.4	526.4	595.75	552.65	535.95	531.1	556.8		183.177	140.988	91.081	88.831	93.081	185.731	97.531	107.181	102.331	128.031	121.796	36.9661
581.08	611.361	540.15	568.6	531.6	664.8	556.25	570.95	510.2	558.55		185.332	126.488	111.381	115.631	97.631	166.981	123.881	142.181	81.431	129.781	128.072	30.8222
599.794	598.243	622.15	568.6	571.9	667.9	669.7	644.45	489.55	582.65		200.736	182.592	193.381	139.831	102.831	236.031	127.481	215.681	60.781	153.881	161.323	54.5304
589.333	597.71	638.5	628.1	556.3	725.45	677.6	705.8	543.4	627.85		143.675	169.474	209.731	139.831	143.131	239.131	240.931	277.031	114.631	199.081	187.665	53.708
583.796	630.654	670.1	619.65	532.95	672.8	784.45	684.25	550.35	606.55		152.311	168.941	241.331	199.331	127.531	296.681	248.831	255.481	121.581	177.781	198.98	59.294
588.983	609.584	713.55	586.9	563.65	612.35	712.05	759.9	533.15	601.5		171.025	201.885	284.781	190.881	104.181	244.031	355.681	331.131	104.381	172.731	216.071	86.9034
578.184	636.474	686.65	607.65	587.65	705.15	659.45	752.85	532.2	570.55		160.564	180.815	257.881	158.131	134.881	183.581	283.281	324.081	103.431	141.781	192.843	71.5473
582.084	596.409	650.4	528.25	566.55	620.6	655.75	727.85	530.1	630.9		155.027	207.705	221.631	178.881	158.881	276.381	230.681	299.081	101.331	202.131	203.173	58.6122
590.748	580.349	545.7	535.9	524.35	609.05	630.4	746.1	585.75	636.3		160.214	167.64	116.931	99.481	137.781	191.831	226.981	317.331	156.981	207.531	178.27	62.5856
598.207	628.49	559.2	550.15	513.35	590.7	584.3	703.3	522.7	569.05		149.415	151.58	130.431	107.131	95.581	180.281	201.631	274.531	93.931	140.281	152.479	55.2292
600.742	616.782	573.85	523.3	498	583.8	608.75	669.1	549.45	610.9		153.315	199.721	145.081	121.381	84.581	161.931	155.531	240.331	120.681	182.131	156.468	43.9852
607.763	568.028	544.6	536.9	508.75	557.7	592.35	584.55	616.7	586.95		161.979	188.013	115.831	94.531	69.231	155.031	179.981	155.781	187.931	158.181	146.649	40.4247
583.352	550.796	521.1	524.8	498.25	527.8	600.1	569.65	545.3	590.95		169.438	139.259	92.331	108.131	79.981	128.931	163.581	140.881	116.531	162.181	130.124	30.7396
578.131	554.075	513.25	528.05	523.3	537.25	575	599.85	592.3	540.15		171.973	122.027	84.481	96.031	69.481	99.031	171.331	171.081	163.531	111.381	126.035	39.9756
577.833	545.55	499.15	527.85	513.25	524.6	570.6	580.9	531.8	608.25		178.994	125.306	70.381	99.281	94.531	108.481	146.231	152.131	103.031	179.481	125.785	37.1078
563.8	563.594	521.5	510.95	495.55	542.55	581.3	624.05	551.4	577.85		154.583	116.781	92.731	99.081	84.481	95.831	141.831	195.281	122.631	149.081	125.231	34.8904
573.627	550.429	489.7	520.95	520.65	511	533.35	578.7	569.95	557		149.362	134.825	60.931	82.181	66.781	113.781	152.531	149.931	141.181	128.231	117.973	35.4365
539.106	530.204	479.05	528.8	519.65	484	565.65	608.15	575.25	575.55		149.064	121.66	50.281	92.181	91.881	82.231	104.581	179.381	146.481	146.781	116.452	39.0949
540.645	539.628	491.75	489.7	508.8	543.35	560.35	652.25	555.1	572.45		135.031	101.435	62.981	100.031	90.881	55.231	136.881	223.481	126.331	143.681	117.596	48.0738
560.859	560.961	508.95	569.8	515.35	507	550.65	636.65	602.65	561.8		144.858	110.859	80.181	60.931	80.031	114.581	131.581	207.881	173.881	133.031	123.782	44.957
576.574	574.48	490.35	483.55	490.8	512.75	538.35	626	560.85	572.5		110.337	132.192	61.581	141.031	86.581	78.231	121.881	197.231	132.081	143.731	120.488	38.9208
542.711	579.918	505.15	544.45	516	567.7	530.75	621.3	575.15	560.25		111.876	145.711	76.381	54.781	62.031	83.981	109.581	192.531	146.381	131.481	111.473	43.4754
542.534	617.824	514.65	553.9	503.9	545.5	542.25	557	551.3	570.65		132.09	151.149	85.881	115.681	87.231	138.931	101.981	128.231	122.531	141.881	120.559	22.6222
528.747	623.808	526.55	553.15	492.2	489.35	530.7	547.95	565	562.6		147.805	189.055	97.781	125.131	75.131	116.731	113.481	119.181	136.231	133.831	125.436	30.3463
528.046	646.891	469.95	570.2	506.15	536.25	531.55	561.45	615.85	560.9		113.942	195.039	41.181	124.381	63.431	60.581	101.931	132.681	187.081	132.131	115.238	51.1397
504.27	620.186	516.45	524.45	510	485.9	623.05	552	531.8	567.2		113.765	218.122	87.681	141.431	77.381	107.481	102.781	123.231	103.031	138.431	121.334	39.5257
516.513	627.573	501.8	554.85	532.55	502.05	588.05	551.5	586.05	504.35		99.978	191.417	73.031	95.681	81.231	57.131	194.281	122.731	157.281	75.581	114.834	49.8615
510.599	608.822	490.05	562.7	533	519.85	587.6	540.3	536.6	594.15		99.277	198.804	61.281	126.081	103.781	73.281	159.281	111.531	107.831	165.381	120.653	42.672
518.794	675.286	508.3	558.9	512.4	508.6	607.8	548.8	556.9	551.8		75.501	180.053	79.531	133.931	104.231	91.081	158.831	120.031	128.131	123.031	119.435	33.4718
533.967	677.778	502	560.1	616.8	503.45	606.45	596.4	554.9	537.65		87.744	246.517	73.231	130.131	83.631	79.831	179.031	167.631	126.131	108.881	128.276	55.28
512.933	664.574	565.2	565.35	602.9	485.7	596.9	596.8	557.65	575.7		81.83	249.009	136.431	131.331	188.031	74.681	177.681	168.031	128.881	146.931	148.284	51.2285
564.658	658.562	543.8	567.9	567.4	539.8	614.45	546.5	528.7	548.55		90.025	235.805	115.031	136.581	174.131	56.931	168.131	117.731	99.931	119.781	131.408	50.4865
572.015	624.697	527.75	539.6	611.65	549.7	632.95	578.7	553.6	558.3		105.198	229.793	98.981	139.131	138.631	111.031	185.681	149.931	124.831	129.531	141.274	39.8709
589.596	616.577	583.3	487.45	574.15	601.65	619.55	580.3	564.5	510.4		84.164	195.928	154.531	110.831	182.881	120.931	204.181	151.531	135.731	81.631	142.234	43.6366
		560.9	531.9	544.35	535.8	578.45	513.95	560.5	528.05		135.889	187.808	132.131	58.681	145.381	172.881	190.781	85.181	131.731	99.281	133.974	43.5054
		563.35	525.8	547.6	599.8	554.1	618.45	562.05	558.2		143.246		134.581	103.131	115.581	107.031	149.681	189.681	133.281	129.431
				551	567.3			514.9			160.827			97.031	118.831	171.031	125.331		86.131
															122.231	138.531

## Sheet: ctrl 5
200526_gip1_C_4										Background corrected	200526_gip1_C_4
551.378	582.674	534.298	534.538	522.4	550.276	522.563	516.313	516.836	520.991										110.439
517.203	588.887	545.645	539.861	513.377	595.211	535.373	526.975	538.229	517.716										131.832	114.594
546.68	576.437	547.626	521.355	555.289	649.052	503.581	521.486	549.417	525.936			176.277	127.901		116.003	143.879	116.166		143.02	111.319
500.279	532.454	562.389	523.969	575.201	612.756	544.577	491.532	488.309	555.23			182.49	139.248		106.98	188.814	128.976		81.912	119.539
503.347	536.676	578.202	543.34	542.072	588.327	529.353	528.946	541.045	598.006			170.04	141.229		148.892	242.655	97.184	109.916	134.648	148.833	Average	Stdev
547.797	558.725	569.364	520.683	562.746	646.655	547.438	495.377	514.728	555.716		144.981	126.057	155.992	128.141	168.804	206.359	138.18	120.578	108.331	191.609	148.903	31.8033
520.712	526.244	538.845	528.206	533.181	646.711	527.787	514.197	574.804	580.37		110.806	130.279	171.805	133.464	135.675	181.93	122.956	115.089	168.407	149.319	141.973	24.8189
510.174	522.52	569.87	533.83	531.808	581.791	577.464	519.795	612.009	568.848		140.283	152.328	162.967	114.958	156.349	240.258	141.041	85.135	205.612	173.973	157.29	43.5971
540.616	518.313	598.589	580.184	560.675	611.385	608.007	528.066	613.167	544.645		93.882	119.847	132.448	117.572	126.784	240.314	121.39	122.549	206.77	162.451	144.401	45.6437
526.868	560.295	556.514	564.824	583.002	596.844	558.003	554.001	554.68	565.762		96.95	116.123	163.473	136.943	125.411	175.394	171.067	88.98	148.283	138.248	136.087	29.6949
530.078	530.994	546.895	507.996	542.562	611.753	554.434	560.102	557.585	556.941		141.4	111.916	192.192	114.286	154.278	204.988	201.61	107.8	151.188	159.365	153.902	36.5198
500.811	543.635	538.593	517.858	533.716	582.846	603.399	508.89	572.896	561.838		114.315	153.898	150.117	121.809	176.605	190.447	151.606	113.398	166.499	150.544	148.924	25.8851
512.691	551.262	533.409	558.208	521.477	557.244	596.124	531.1	562.05	572.965		103.777	124.597	140.498	127.433	136.165	205.356	148.037	121.669	155.653	155.441	141.863	27.5742
504.798	543.675	544.783	541.902	549.604	540.333	580.295	522.924	588.504	549.83		134.219	137.238	132.196	173.787	127.319	176.449	197.002	147.604	182.107	166.568	157.449	24.6625
475.906	550.37	545.13	540.459	554.927	572.139	588.207	504.279	566.532	573.304		120.471	144.865	127.012	158.427	115.08	150.847	189.727	153.705	160.135	143.433	146.37	21.919
522.207	565.707	534.592	581.412	529.487	568.715	560.945	521.635	576.371	652.456		123.681	137.278	138.386	101.599	143.207	133.936	173.898	102.493	169.974	166.907	139.136	25.7527
483.876	575.505	549.028	552.527	527.693	568.493	546.42	553.673	595.102	619.009		94.414	143.973	138.733	111.461	148.53	165.742	181.81	124.703	188.705	246.059	154.413	43.6791
525.694	528.703	536.713	581.155	513.813	530.057	581.826	523.922	572.938	598.812		106.294	159.31	128.195	151.811	123.09	162.318	154.548	116.527	166.541	212.612	148.125	31.0042
505.81	517.195	535.753	554.501	516.259	579.02	603.701	531.563	579.793	611.609		98.401	169.108	142.631	135.505	121.296	162.096	140.023	97.882	173.396	192.415	143.275	31.5739
510.69	545.229	546.966	538.551	548.821	561.635	582.671	490.673	590.057	634.446		69.509	122.306	130.316	134.062	107.416	123.66	175.429	115.238	183.66	205.212	136.681	40.3551
535.221	555.498	533.106	554.973	512.591	562.521	550.944	494.851	597.824	623.019		115.81	110.798	129.356	175.015	109.862	172.623	197.304	147.276	191.427	228.049	157.752	41.2748
530.169	529.46	520.592	522.843	511.361	576.22	552.715	498.215	564.388	612.628		77.479	138.832	140.569	146.13	142.424	155.238	176.274	117.525	157.991	216.622	146.908	36.0932
557.327	512.952	522.057	527.212	551.435	526.805	550.925	526.175	567.348	608.723		119.297	149.101	126.709	174.758	106.194	156.124	144.547	125.166	160.951	206.231	146.908	29.6049
629.172	508.814	544.356	566.994	537.283	516.334	549.14	524.206	565.614	574.243		99.413	123.063	114.195	148.104	104.964	169.823	146.318	84.276	159.217	202.326	135.17	36.436
700.647	535.585	501.253	566.105	537.26	558.645	517.603	550.708	563.137	574.534		104.293	106.555	115.66	132.154	145.038	120.408	144.528	88.454	156.74	167.846	128.168	25.3637
673.924	550.635	519.067	566.667	546.479	596.222	568.658	536.008	534.879	552.054		128.824	102.417	137.959	148.576	130.886	109.937	142.743	91.818	128.482	168.137	128.978	22.707
688.213	549.881	565.635	598.869	580.293	587.401	574.479	566.66	570.738	524.644		123.772	129.188	94.856	116.446	130.863	152.248	111.206	119.778	164.341	145.657	128.835	20.609
709.258	543.168	568.174	627.13	604.672	589.453	589.183	591.459	604.84	568.374		150.93	144.238	112.67	120.815	140.082	189.825	162.261	117.809	198.443	118.247	145.532	30.3785
726.337	559.252	549.336	621.91	593.461	620.288	615.437	658.175	627.906	544.282		222.775	143.484	159.238	160.597	173.896	181.004	168.082	144.311	221.509	161.977	173.687	28.0357
710.545	506.535	557.737	588.049	604.848	667.567	720.478	695.407	596.545	512.589		294.25	136.772	161.777	159.708	198.275	183.056	182.786	129.611	190.148	137.885	177.427	47.57
695.925	498.721	594.602	606.256	551.159	644.877	737.541	694.235	619.358	543.139		267.527	152.855	142.939	160.27	187.064	213.891	209.04	160.263	212.961	106.192	181.3	46.0786
661.307	545.057	618.979	572.168	587.753	684.381	830.671	674.267	626.5	555.731		281.816	100.138	151.34	192.472	198.451	261.17	314.081	185.062	220.103	136.742	204.138	66.922
657.928	551.064	580.125	562.394	575.796	688.187	810.538	644.295	689.521	567.483		302.861	92.324	188.205	220.733	144.762	238.48	331.144	251.778	283.124	149.334	220.274	76.3917
635.315	528.712	584.743	553.47	580.971	678.23	739.587	637.726	743.799	581.365		319.94	138.66	212.582	215.513	181.356	277.984	424.274	289.01	337.402	161.086	255.781	89.7383
633.825	534.572	569.422	542.803	569.945	660.343	701.223	611.27	744.41	562.983		304.148	144.667	173.728	181.652	169.399	281.79	404.141	287.838	338.013	174.968	246.034	88.464
606.158	555.76	547.162	546.975	534.244	605.578	665.887	604.203	700.094	567.869		289.528	122.315	178.346	199.859	174.574	271.833	333.19	267.87	293.697	156.586	228.78	70.752
579.661	533.676	555.971	525.994	533.417	601.5	658.308	593.044	699.282	542.333		254.91	128.175	163.025	165.771	163.548	253.946	294.826	237.898	292.885	161.472	211.646	61.5862
598.332	537.52	535.609	500.66	552.657	578.101	655.715	595.505	615.705	504.246		251.531	149.363	140.765	155.997	127.847	199.181	259.49	231.329	209.308	135.936	186.075	50.1593
561.816	559.626	538.322	533.684	523.775	588.192	613.403	596.66	643.776	520.476		228.918	127.279	149.574	147.073	127.02	195.103	251.911	204.873	237.379	97.849	176.698	53.6857
553.304	554.904	532.744	532.261	566.833	554.927	601.053	560.425	623.202	526.624		227.428	131.123	129.212	136.406	146.26	171.704	249.318	197.806	216.805	114.079	172.014	47.7376
547.634	588.829	539.713	497.357	528.378	552.604	570.547	555.803	620.073	527.087		199.761	153.229	131.925	140.578	117.378	181.795	207.006	186.647	213.676	120.227	165.222	36.8085
574.242	553.674	505.552	535.228	503.506	538.495	563.659	556.419	616.555	544.918		173.264	148.507	126.347	119.597	160.436	148.53	194.656	189.108	210.158	120.69	159.129	32.1568
566.652	560.228	519.666	515.194	485.691	513.875	573.566	560.663	595.147	551.161		191.935	182.432	133.316	94.263	121.981	146.207	164.15	190.263	188.75	138.521	155.182	33.6335
543.768	549.025	526.663	517.192	533.693	537.952	542.953	525.3	586.751	554.615		155.419	147.277	99.155	127.287	97.109	132.098	157.262	154.028	180.354	144.764	139.475	26.1743
572.099	544.164	519.309	522.194	529.983	541.199	550.525	537.772	591.772	554.379		146.907	153.831	113.269	125.864	79.294	107.478	167.169	149.406	185.375	148.218	137.681	31.2615
512.676	560.195	545.877	552.252	534.189	502.52	569.149	567.692	619.831	530.567		141.237	142.628	120.266	90.96	127.296	131.555	136.556	150.022	213.434	147.982	140.194	30.9187
549.771	589.311	538.832	552.395	539.279	518.004	570.366	513.728	561.645	530.218		167.845	137.767	112.912	128.831	123.586	134.802	144.128	154.266	155.248	124.17	138.355	17.0355
561.091	533.677	577.882	563.573	547.387	553.829	567.412	515.241	551.194	534.615		160.255	153.798	139.48	108.797	127.792	96.123	162.752	118.903	144.797	123.821	133.652	22.344
535.696	550.573	556.793	533.512	587.083	562.899	575.618	514.725	574.826	547.45		137.371	182.914	132.435	110.795	132.882	111.607	163.969	131.375	168.429	128.218	139.999	24.0634
556.288	532.122	551.02	560.981	626.074	554.75	567.24	535.212	566.83	508.98		165.702	127.28	171.485	115.797	140.99	147.432	161.015	161.295	160.433	141.053	149.248	17.9943
532.01	530.919	551.675	582.546	573.641	559.841	537.304	522.262	546.591	509.333		106.279	144.176	150.396	145.855	180.686	156.502	169.221	107.331	140.194	102.583	140.322	26.9665
554.308	536.123	514.839	553.953	601.624	581.04	568.368	547.694	550.457	532.337		143.374	125.725	144.623	145.998	219.677	148.353	160.843	108.844	144.06	102.936	144.443	32.1258
558.621	596.397	528.006	549.162	650.166	574.465	531.556	518.572	561.034	591.788		154.694	124.522	145.278	157.176	167.244	153.444	130.907	108.328	154.637	125.94	142.217	18.708
550.099	552.371	532.631	540.241	636.332	618.414	547.934	548.952	567.047	573.307		129.299	129.726	108.442	127.115	195.227	174.643	161.971	128.815	160.65	185.391	150.128	29.2518
556.335	594.044	536.901	552.222	674.427	616.463	560.765	558.807	610.849	566.61		149.891	190	121.609	154.584	243.769	168.068	125.159	115.865	204.452	166.91	164.031	40.2917
557.859	557.938	565.756	546.74	686.49	606.62	553.99	521.016	632.522	542.64		125.613	145.974	126.234	176.149	229.935	212.017	141.537	141.297	226.125	160.213	168.509	40.4364
548.51	529.361	523.159	565.199	632.304	605.808	554.09	523.301	608.648	588.789		147.911	187.647	130.504	147.556	268.03	210.066	154.368	112.175	202.251	136.243	169.675	46.9573
540.631	534.136	529.149	551.312	610.733	571.914	534.087	542.972	612.643	610.096		152.224	151.541	159.359	142.765	280.093	200.223	147.593	142.555	206.246	182.392	176.499	43.2639
541.994	554.513	503.7	536	629.103	580.385	548.694	553.816	657.419	593.669		143.702	122.964	116.762	133.844	225.907	199.411	147.693	152.41	251.022	203.699	169.741	46.5983
553.159	579.185	527.149	509.005	622.068	598.054	547.492	554.139	603.499	592.501		149.938	127.739	122.752	145.825	204.336	165.517	127.69	114.619	197.102	187.272	154.279	32.6987
563.71	542.316	530.733	535.477	585.117	566.53	547.444	540.114	611.8	586.403		151.462	148.116	97.303	140.343	222.706	173.988	142.297	116.904	205.403	186.104	158.463	38.8001
545.352	552.523	535.675	540.529	599.955	536.91	521.417	532.065	602.673	550.848		142.113	172.788	120.752	158.802	215.671	191.657	141.095	136.575	196.276	180.006	165.574	30.6203
541.009	577.859	533.514	524.323	585.625	553.586	517.209	508.697	558.046	576.974		134.234	135.919	124.336	144.915	178.72	160.133	141.047	147.419	151.649	144.451	146.282	15.059
537.007	533.819	533.17	502.641	562.972	543.572	515.516	505.086	528.912			135.597	146.126	129.278	129.603	193.558	130.513	115.02	147.742	122.515	170.577	142.053	23.8535
											146.762	171.462	127.117	102.608	179.228	147.189	110.812	133.717
											157.313	127.422	126.773	129.08	156.575	137.175	109.119	125.668
											138.955			134.132				102.3
											134.612			117.926				98.689
											130.61			96.244

## Sheet: ctrl 6
200526_gip1_C_9										Background corrected	200526_gip1_C_9
526.609	511.838	558.334	534.739	546.45	508.556	501.623	509.177	505.482	484.586			89.36			123.972
516.128	508.474	547.397	557.9	535.074	513.048	525.848	524.434	510.154	478.041			85.996			112.596
516.742	532.501	524.67	532.479	557.869	515.517	527.776	514.465	521.947	494.603			110.023	135.856		135.391
544.202	531.3	533.442	530.993	543.305	526.518	543.12	500.028	495.457	514.922		104.131	108.822	124.919		120.827	86.0782		86.699		62.108
555.194	523.415	542.299	548.335	509.35	517.526	567.309	499.094	511.815	511.198		93.65	100.937	102.192	112.261	86.872	90.5695		101.956	83.004	55.563
548.286	513.988	551.372	518.155	515.196	498.221	562.177	509.19	520.996	496.961		94.264	91.51	110.964	135.422	92.718	93.0392		91.987	87.676	72.125
564.144	514.495	559.209	526.555	513.924	494.018	556.339	518.314	497.215	506.269		121.724	92.017	119.821	110.001	91.446	104.04	79.145	77.55	99.469	92.444	98.7657	15.2721
565.903	535.728	550.387	531.718	527.771	527.177	572.052	513.647	500.195	476.747		132.716	113.25	128.894	108.515	105.293	95.0476	103.37	76.616	72.979	88.72	102.54	19.8797
548.66	514.014	545.648	518.204	524.315	513.924	574.485	506.48	533.519	478.457		125.808	91.536	136.731	125.857	101.837	75.7428	105.298	86.712	89.337	74.483	101.334	21.8553
548.232	503.596	541.016	551.267	511.465	517.544	588.851	524.101	501.57	490.873		141.666	81.118	127.909	95.677	88.987	71.5404	120.642	95.836	98.518	83.791	100.568	22.4265
552.033	510.892	539.112	541.386	521.369	518.663	560.375	523.768	513.803	479.467		143.425	88.414	123.17	104.077	98.891	104.699	144.831	91.169	74.737	54.269	102.768	28.553
584.544	539.592	536.436	533.051	535.746	519.432	540.128	522.236	515.297	462.482		126.182	117.114	118.538	109.24	113.268	91.4464	139.699	84.002	77.717	55.979	103.319	25.414
603.152	562.619	524.231	521.797	547.946	517.592	542.385	516.72	513.238	481.848		125.754	140.141	116.634	95.726	125.468	95.0665	133.861	101.623	111.041	68.395	111.371	21.6525
580.595	550.7	540.234	520.736	539.543	510.498	536.011	513.834	509.238	496.24		129.555	128.222	113.958	128.789	117.065	96.185	149.574	101.29	79.092	56.989	110.072	27.3481
576.145	530.289	525.869	539.993	530.464	498.659	525.213	509.675	510.548	502.666		162.066	107.811	101.753	118.908	107.986	96.9535	152.007	99.758	91.325	40.004	107.857	33.5146
585.531	548.643	515.367	541.406	518.419	530.456	497.069	493.852	519.004	490.389		180.674	126.165	117.756	110.573	95.941	95.1138	166.373	94.242	92.819	59.37	113.903	36.314
577.091	553.925	516.335	527.237	530.404	524.843	485.339	488.642	511.154	495.541		158.117	131.447	103.391	99.319	107.926	88.0199	137.897	91.356	90.76	73.762	108.199	26.2408
589.873	535.857	519.765	519.958	539.142	509.616	496.045	496.839	499.162	480.227		153.667	113.379	92.889	98.258	116.664	76.1806	117.65	87.197	86.76	80.188	102.283	23.4495
566.651	523.438	496	509.427	540.441	508.892	510.899	486.907	513.193	480.148		163.053	100.96	93.857	117.515	117.963	107.978	119.907	71.374	88.07	67.911	104.859	27.6066
559.985	526.142	499.826	514.132	532.08	496.394	510.126	487.288	514.962	477.361		154.613	103.664	97.287	118.928	109.602	102.365	113.533	66.164	96.526	73.063	103.575	24.4889
558.784	524.841	511.735	541.326	518.159	501.122	514.98	506.136	541.989	493.5		167.395	102.363	73.522	104.759	95.681	87.1385	102.735	74.361	88.676	57.749	95.438	29.4874
562.685	543.209	504.719	532.307	517.672	511.034	489.745	510.27	537.694	511.929		144.173	120.731	77.348	97.48	95.194	86.4144	74.591	64.429	76.684	57.67	89.4714	26.3439
544.223	539.065	491.006	516.58	538.89	501.803	487.745	507.863	540.348	523.487		137.507	116.587	89.257	86.949	116.412	73.9155	62.861	64.81	90.715	54.883	89.3897	26.9382
530	544.865	500.529	514.998	541.699	499.223	510.422	498.12	531.013	525.862		136.306	122.387	82.241	91.654	119.221	78.6443	73.567	83.658	92.484	71.022	95.1184	22.7389
539.101	529.949	532.845	526.09	530.93	531.537	508.431	493.206	550.811	507.881		140.207	107.471	68.528	118.848	108.452	88.5558	88.421	87.792	119.511	89.451	101.724	20.9918
540.067	538.601	522.613	524.293	519.323	535.39	496.079	494.816	562.812	538.978		121.745	116.123	78.051	109.829	96.845	79.3246	87.648	85.385	115.216	101.009	99.1176	16.1229
569.864	522.057	523.867	537.898	533.532	534.504	498.829	503.754	558.994	542.747		107.522	99.579	110.367	94.102	111.054	76.7447	92.502	75.642	117.87	103.384	98.8767	14.2584
575.761	529.836	539.403	517.488	543.262	563.377	508.826	511.959	586.26	548.621		116.623	107.358	100.135	92.52	120.784	109.059	67.267	70.728	108.535	85.403	97.8412	18.4634
595.17	524.831	561.77	530.024	583.817	565.297	524.798	503.984	586.786	517.066		117.589	102.353	101.389	103.612	161.339	112.912	65.267	72.338	128.333	116.5	108.163	27.1606
591.149	522.427	552.842	571.969	553.73	559.958	553.665	501.732	598.633	512.124		147.386	99.949	116.925	101.815	131.252	112.026	87.944	81.276	140.334	120.269	113.918	21.7386
573.648	552.108	555.372	592.946	547.427	553.615	569.207	513.668	614.857	522.393		153.283	129.63	139.292	115.42	124.949	140.899	85.953	89.481	136.516	126.143	124.157	21.8155
600.391	562.772	585.926	611.419	609.874	556.387	577.539	555.795	642.058	562.933		172.692	140.294	130.364	95.01	187.396	142.819	73.601	81.506	163.782	94.588	128.205	40.1486
702.976	599.826	620.409	635.238	631.034	570.874	606.965	611.555	673.029	604.507		168.671	177.348	132.894	107.546	208.556	137.48	76.351	79.254	164.308	89.646	134.205	45.4103
798.683	608.751	643.605	680.448	655.082	553.12	599.047	637.297	700.427	636.695		151.17	186.273	163.448	149.491	232.604	131.137	86.348	91.19	176.155	99.915	146.773	46.2794
869.209	626.723	658.798	720.813	663.241	562.158	563.099	682.984	735.479	655.609		177.913	204.245	197.931	170.468	240.763	133.909	102.32	133.317	192.379	140.455	169.37	41.6622
1004.37	635.656	642.703	783.707	702.82	533.853	574.706	704.19	757.333	733.529		280.498	213.178	221.127	188.941	280.342	148.396	131.187	189.077	219.58	182.029	205.435	48.996
1071.24	661.893	663.853	753.191	741.189	566.802	570.171	732.402	667.153	797.221		376.205	239.415	236.32	212.76	318.711	130.642	146.729	214.819	250.551	214.217	234.037	72.4311
1039.99	705.031	682.78	685.149	751.804	554.019	571.257	715.845	602.924	748.335		446.731	282.553	220.225	257.97	329.326	139.68	155.061	260.506	277.949	233.131	260.313	87.1155
838.19	714.177	631.236	587.828	788.422	540.782	538.437	650.54	550.823	665.348		581.895	291.699	241.375	298.335	365.944	111.375	184.487	281.712	313.001	311.051	298.087	123.304
653.852	712.521	567.009	554.15	797.115	519.186	530.419	586.801	532.138	619.503		648.76	290.043	260.302	361.229	374.637	144.324	176.569	309.924	334.855	374.743	327.539	138.008
540.947	753.365	555.236	528.459	727.51	510.287	544.763	535.384	523.17	560.212		617.514	330.887	208.758	330.713	305.032	131.541	140.621	293.367	244.675	325.857	292.896	136.671
529.16	788.306	531.029	524.914	602.685	508.743	541.04	528.451	516.665	524.22		415.712	365.828	144.531	262.671	180.207	118.304	152.228	228.062	180.446	242.87	229.086	97.143
514.821	748.845	531.745	515.071	569.883	505.045	518.197	515.667	527.916	516.574		231.374	326.367	132.758	165.35	147.405	96.7076	147.693	164.323	128.345	197.025	173.735	65.2892
514.794	650.046	543.427	522.114	536.588	498.582	506.875	504.132	522.659	498.975		118.469	227.568	108.551	131.672	114.11	87.8094	148.779	112.906	109.66	137.734	129.726	38.392
493.657	586.653	521.201	520.321	517.156	499.548	519.098	495.672	506.73	509.115		106.682	164.175	109.267	105.981	94.678	86.2645	115.959	105.973	100.692	101.742	109.141	20.9761
501.866	548.867	510.504	506.484	515.056	503.563	490.672	510.123	504.432	514.241		92.343	126.389	120.949	102.436	92.578	82.5672	107.941	93.189	94.187	94.096	100.668	13.8742
520.465	511.484	518.692	519.753	493.442	511.368	487.609	536.04	529.678	519.677		92.316	89.006	98.723	92.593	70.964	76.1042	122.285	81.654	105.438	76.497	90.558	15.5426
521.65	516.212	516.827	514.703	495.444	519.109	505.427	521.233	528.02	515.139		71.179	93.734	88.026	99.636	72.966	77.0704	118.562	73.194	100.181	86.637	88.1185	15.2754
521.393	503.36	503.965	504.189	497.478	527.654	527.216	528.242	493.809	504.358		79.388	80.882	96.214	97.843	75	81.0853	95.719	87.645	84.252	91.763	86.9791	8.05188
525.676	493.329	504.963	525.831	490.634	532.715	518.653	516.713	518.86	512.919		97.987	70.851	94.349	84.006	68.156	88.89	84.397	113.562	81.954	97.199	88.1351	13.4662
524.767	503.107	482.026	531.961	498.155	524.204	512.463	540.655	539.491	528.145		99.172	80.629	81.487	97.275	75.677	96.6313	96.62	98.755	107.2	92.661	92.6107	10.0094
517.992	494.865	501.591	512.023	488.186	514.172	520.467	552.438	534.774	524.084		98.915	72.387	82.485	92.225	65.708	105.176	68.194	105.764	105.542	81.88	87.8276	15.8319
505.387	525.68	528.2	508.199	479.937	525.557	514.294	535.18	526.229	509.955		103.198	103.202	59.548	81.711	57.459	110.237	65.131	94.235	71.331	90.441	83.6493	19.4215
513.116	510.179	506.429	515.616	510.02	552.064	511.839	543.32	523.939	503.985		102.289	87.701	79.113	103.353	87.542	101.726	82.949	118.177	96.382	105.667	96.4899	12.0431
537.762	510.016	496.391	517.029	509.247	550.88	522.671	529.58	518.324	524.676		95.514	87.538	105.722	109.483	86.769	91.6941	104.738	129.96	117.013	101.606	103.004	13.5973
531.698	518.099	515.862	533.907	515.008	560.512	519.042	520.326	507.217	506.492		82.909	95.621	83.951	89.545	92.53	103.079	96.175	112.702	112.296	87.477	95.6285	10.7306
543.047	530.021	534.923	556.476	542.69	565.353	526.113	508.533	489.158	511.86		90.638	107.543	73.913	85.721	120.212	129.586	89.985	120.842	103.751	81.507	100.37	18.8627
535.644	548.364	512.588	538.488	537.054	570.545	528.769	494.157	488.109	517.059		115.284	125.886	93.384	93.138	114.576	128.402	97.989	107.102	101.461	102.198	107.942	12.6683
529.371	524.53	500.124	532.593	550.098	567.427	521.491	497.785	505.916	517.042		109.22	102.052	112.445	94.551	127.62	138.034	91.816	97.848	95.846	84.014	105.345	16.8061
553.456	518.622	509.89	520.734	538.99	560.235	526.278	524.964	515.647	536.968		120.569	96.144	90.11	111.429	116.512	142.875	89.361	86.055	84.739	89.382	102.718	19.3125
534.269	509.56	533.497	494.978	530.182	559.472	527.963	512.805	509.937	527.997		113.166	87.082	77.646	133.998	107.704	148.067	100.193	71.679	66.68	94.581	100.08	26.4728
567.895	529.568	522.867	493.365	568.073	547.79	536.07	510.186	514.785	540.457		106.893	107.09	87.412	116.01	145.595	144.949	96.564	75.307	65.631	94.564	104.002	26.4241
553.805	544.287	527.036	512.772	567.336	566.372	530.59	516.786	522.17	533.521		130.978	121.809	111.019	110.115	144.858	137.757	103.635	102.486	83.438	114.49	116.058	18.3234
528.196	556.27	532.476	502.092	581.196	529.805	528.838	518.499	495.917	524.696		111.791	133.792	100.389	98.256	158.718	136.994	106.291	90.327	93.169	105.519	113.525	22.3149
546.797	555.784	552.68	488.774	613.665	536.365	518.172	534.434	492.199	505.464		145.417	133.306	104.558	72.5	191.187	125.312	99.013	87.708	87.459	117.979	116.444	34.6945
555.51	535.543	561.764	491.311	597.126	575.074	529.425	536.621	516.431	515.045		131.327	113.065	109.998	70.887	174.648	143.894	103.8	94.308	92.307	111.043	114.528	29.2803
531.124	531.752	557.83	489.909	553.876	568.604	527.085	504.459	522.278	532.256		105.718	109.274	130.202	90.294	131.398	107.327	105.485	96.021	99.692	102.218	107.763	13.387
545.198	537.977	550.269	501.847	546.273	565.356	539.76	526.041	516.783	529.359		124.319	115.499	139.286	79.614	123.795	113.887	113.592	111.956	73.439	82.986	107.837	21.7513
587.161	564.293	550.412	520.908	539.335	585.428	520.711	542.56	525.259	508.931		133.032	141.815	135.352	66.296	116.857	152.596	108.112	114.143	69.721	92.567	113.049	29.4598
619.623	577.997	550.746	526.568	539.721	587.757	539.148	544.077	549.915	533.631		108.646	155.519	127.791	68.833	117.243	146.126	106.36	81.981	93.953	109.778	111.623	26.8165
603.461	556.459	568.199	520.017	565.344	573.399	538.756	553.053	527.755	571.226		122.72	133.981	127.934	67.431	142.866	142.877	95.694	103.563	99.8	106.881	114.375	24.0375
589.591	515.837	555.285	505.411	573.036	590.727	560.098	551.106	547.167	558.982		164.683	93.359	128.268	79.369	150.558	162.95	106.947	120.082	94.305	86.453	118.697	31.8731
586.402	532.365	533.276	537.508	596.75	584.205	566.559	529.72	524.648	564.902		197.145	109.887	145.721	98.43	174.272	165.279	104.607	121.599	102.781	111.153	133.087	35.0833
											180.983		132.807	104.09		150.921	117.282	130.575	127.437	148.748
											167.113		110.798	97.539		168.249	98.233	128.628	105.277	136.504
											163.924			82.933		161.727	116.67	107.242	124.689	142.424
														115.03			116.278		102.17
																	137.62
																	144.081

## Sheet: par-6 deg 1
200311_par6aid_gip1_A_6										Background corrected											Average	Stdev
698.367	681.89	683.119	711.09	664.96	658.175	680.971	758.516	688.695	635.393		95.014	78.537	79.766	107.737	61.607	54.822	77.618	155.163	85.342	32.04	82.7646	33.127
707.242	647.532	718.863	673.579	680.349	652.013	684.023	719.821	733.728	643.244		103.889	44.179	115.51	70.226	76.996	48.66	80.67	116.468	130.375	39.891	82.6864	32.6703
706.713	656.906	698.738	671.857	655.752	655.548	650.203	735.628	684.891	642.622		103.36	53.553	95.385	68.504	52.399	52.195	46.85	132.275	81.538	39.269	72.5328	29.9709
752.641	627.461	687.548	677.208	643.083	634.47	623.151	720.203	691.279	638.2		149.288	24.108	84.195	73.855	39.73	31.117	19.798	116.85	87.926	34.847	66.1714	43.669
744.417	614.854	649.217	670.16	672.529	664.583	643.622	746.526	636.66	651.63		141.064	11.501	45.864	66.807	69.176	61.23	40.269	143.173	33.307	48.277	66.0668	43.518
740.581	644.088	667.298	655.336	699.753	672.597	637.401	693.654	692.013	639.371		137.228	40.735	63.945	51.983	96.4	69.244	34.048	90.301	88.66	36.018	70.8562	32.7196
763.117	625.049	661.092	673.656	702.211	650.078	674.448	678.752	660.535	642.995		159.764	21.696	57.739	70.303	98.858	46.725	71.095	75.399	57.182	39.642	69.8403	38.0523
732.483	657.251	690.611	667.625	680.471	618.128	714.178	663.028	635.354	634.494		129.13	53.898	87.258	64.272	77.118	14.775	110.825	59.675	32.001	31.141	66.0093	36.1397
726.813	611.937	650.442	637.044	672.49	615.68	723.381	686.352	634.138	635.45		123.46	8.584	47.089	33.691	69.137	12.327	120.028	82.999	30.785	32.097	56.0197	41.4887
700.105	618.881	627.711	624.792	704.767	648.952	734.872	681.152	660.56	597.48		96.752	15.528	24.358	21.439	101.414	45.599	131.519	77.799	57.207	-5.873	56.5742	44.3092
663.763	654.674	597.015	639.739	674.93	629.979	732.517	680.141	684.335	632.574		60.41	51.321	-6.338	36.386	71.577	26.626	129.164	76.788	80.982	29.221	55.6137	37.3309
651.39	641.387	633.423	644.987	684.934	636.902	752.545	663.512	633.526	630.265		48.037	38.034	30.07	41.634	81.581	33.549	149.192	60.159	30.173	26.912	53.9341	37.4105
698.13	621.117	668.796	662.523	706.149	629.622	718.805	687.134	617.343	635.547		94.777	17.764	65.443	59.17	102.796	26.269	115.452	83.781	13.99	32.194	61.1636	37.2826
672.622	653.729	649.862	662.849	707.887	598.707	736.747	662.108	613.504	618.153		69.269	50.376	46.509	59.496	104.534	-4.646	133.394	58.755	10.151	14.8	54.2638	42.3088
643.164	651.616	669.883	639.418	684.562	636.223	722.503	661.673	608.466	635.797		39.811	48.263	66.53	36.065	81.209	32.87	119.15	58.32	5.113	32.444	51.9775	31.5816
655.506	631.47	634.84	648.313	664.652	649.786	704.604	678.591	611.078	649.477		52.153	28.117	31.487	44.96	61.299	46.433	101.251	75.238	7.725	46.124	49.4787	25.9382
626.92	610.444	633.084	638.072	708.027	644.663	706.997	706.998	628.547	637.276		23.567	7.091	29.731	34.719	104.674	41.31	103.644	103.645	25.194	33.923	50.7498	37.8192
630.388	648.699	646.44	631.15	729.988	650.442	735.782	726.886	611.849	703.067		27.035	45.346	43.087	27.797	126.635	47.089	132.429	123.533	8.496	99.714	68.1161	47.2405
633.757	680.15	612.589	613.074	732.261	674.607	763.802	738.854	612.646	655.974		30.404	76.797	9.236	9.721	128.908	71.254	160.449	135.501	9.293	52.621	68.4184	56.6131
634.282	672.077	613.527	608.047	716.527	666.764	753.401	691.581	617.028	677.419		30.929	68.724	10.174	4.694	113.174	63.411	150.048	88.228	13.675	74.066	61.7123	47.7514
666.78	706.155	660.404	629.025	726.135	672.271	753.078	698.605	626.206	715.531		63.427	102.802	57.051	25.672	122.782	68.918	149.725	95.252	22.853	112.178	82.066	41.6048
657.953	709.482	650.889	615.608	705.702	679.076	751.379	673.372	587.606	710.31		54.6	106.129	47.536	12.255	102.349	75.723	148.026	70.019	-15.747	106.957	70.7847	48.6039
646.252	682.673	680.985	623.684	663.162	651.012	726.969	606.896	641.377	715.817		42.899	79.32	77.632	20.331	59.809	47.659	123.616	3.543	38.024	112.464	60.5297	38.2529
659.649	712.461	675.516	636.102	671.79	646.784	665.839	615.242	648.037	702.589		56.296	109.108	72.163	32.749	68.437	43.431	62.486	11.889	44.684	99.236	60.0479	29.3569
668.788	745.458	680.956	605.021	644.496	622.542	696.371	610.403	647.242	670.686		65.435	142.105	77.603	1.668	41.143	19.189	93.018	7.05	43.889	67.333	55.8433	42.8678
631.129	736.528	721.906	635.098	690.224	666.329	674.923	620.798	624.004	747.004		27.776	133.175	118.553	31.745	86.871	62.976	71.57	17.445	20.651	143.651	71.4413	47.7636
676.216	739.422	737.082	638.228	661.566	674.925	702.813	629.937	654.759	752.605		72.863	136.069	133.729	34.875	58.213	71.572	99.46	26.584	51.406	149.252	83.4023	43.961
665.774	734.026	755.979	634.944	638.834	665.511	692.683	651.791	630.507	784.181		62.421	130.673	152.626	31.591	35.481	62.158	89.33	48.438	27.154	180.828	82.07	54.5633
693.712	706.173	746.946	660.392	635.768	666.634	721.73	641.885	646.965	787.548		90.359	102.82	143.593	57.039	32.415	63.281	118.377	38.532	43.612	184.195	87.4223	50.0726
671.783	732.548	742.254	646.349	646.214	696.503	701.351	652.545	677.101	786.34		68.43	129.195	138.901	42.996	42.861	93.15	97.998	49.192	73.748	182.987	91.9458	46.4714
666.898	687.485	708.727	663.159	625.405	661.218	743.47	596.257	669.495	793.762		63.545	84.132	105.374	59.806	22.052	57.865	140.117	-7.096	66.142	190.409	78.2346	56.5078
660.709	698.473	704.38	665.448	615.862	624.917	698.807	609.553	671.133	725.645		57.356	95.12	101.027	62.095	12.509	21.564	95.454	6.2	67.78	122.292	64.1397	40.2514
668.73	731.738	689.472	717.327	611.102	657.198	682.569	617.756	638.896	694.836		65.377	128.385	86.119	113.974	7.749	53.845	79.216	14.403	35.543	91.483	67.6094	40.1767
668.391	718.674	693.935	714.239	618.661	632.837	707.276	648.759	630.232	682.983		65.038	115.321	90.582	110.886	15.308	29.484	103.923	45.406	26.879	79.63	68.2457	37.2435
633.05	736.252	691.671	715.554	655.107	620.156	724.794	644.762	711.162	696.92		29.697	132.899	88.318	112.201	51.754	16.803	121.441	41.409	107.809	93.567	79.5898	41.3506
641.463	684.742	654.264	689.513	638.562	631.955	730.532	633.095	654.107	715.359		38.11	81.389	50.911	86.16	35.209	28.602	127.179	29.742	50.754	112.006	64.0062	35.5312
645.017	661.158	698.769	684.711	618.882	667.84	699.339	623.351	688.593	713.089		41.664	57.805	95.416	81.358	15.529	64.487	95.986	19.998	85.24	109.736	66.7219	32.6655
660.944	696.781	726.085	694.963	648.852	677.601	719.946	639.668	709.356	774.041		57.591	93.428	122.732	91.61	45.499	74.248	116.593	36.315	106.003	170.688	91.4707	40.4129
667.787	711.98	721.645	690.545	691.888	652.102	714.551	682.68	697.237	758.978		64.434	108.627	118.292	87.192	88.535	48.749	111.198	79.327	93.884	155.625	95.5863	29.9734
663.622	694.774	752.723	712.236	716.38	665.451	681.812	733.421	731.25	783.538		60.269	91.421	149.37	108.883	113.027	62.098	78.459	130.068	127.897	180.185	110.168	38.4663
734.668	720.506	768.824	720.921	716.219	693.16	688.683	775.974	715.867	836.251		131.315	117.153	165.471	117.568	112.866	89.807	85.33	172.621	112.514	232.898	133.754	44.7876
725.396	741.524	785.332	745.045	702.612	662.136	704.352	812.341	746.797	833.815		122.043	138.171	181.979	141.692	99.259	58.783	100.999	208.988	143.444	230.462	142.582	52.4467
709.945	755.642	791.588	738.676	689.32	678.739	704.155	803.468	743.206	828.847		106.592	152.289	188.235	135.323	85.967	75.386	100.802	200.115	139.853	225.494	141.006	50.7276
706.414	755.71	790.12	725.66	712.816	714.457	727.175	839.829	756.294	770.725		103.061	152.357	186.767	122.307	109.463	111.104	123.822	236.476	152.941	167.372	146.567	41.9519
712.57	713.56	762.05	697.276	677.036	731.956	741.254	860.153	780.67	808.095		109.217	110.207	158.697	93.923	73.683	128.603	137.901	256.8	177.317	204.742	145.109	55.5832
688.709	712.963	787.077	708.445	671.606	677.759	727.158	795.658	793.785	809.401		85.356	109.61	183.724	105.092	68.253	74.406	123.805	192.305	190.432	206.048	133.903	53.7713
667.43	684.088	735.477	731.869	662.712	682.934	672.584	733.077	731.271	784.531		64.077	80.735	132.124	128.516	59.359	79.581	69.231	129.724	127.918	181.178	105.244	40.1384
674.849	628.431	693.915	672.313	657.77	695.71	668.983	711.315	735.555	776.485		71.496	25.078	90.562	68.96	54.417	92.357	65.63	107.962	132.202	173.132	88.1796	41.962
673.56	619.1	692.459	700.017	672.189	682.851	655.801	659.872	697.971	710.801		70.207	15.747	89.106	96.664	68.836	79.498	52.448	56.519	94.618	107.448	73.1091	26.9001
668.458	629.062	671.227	649.723	699.528	689.673	670.181	655.246	735.003	713.654		65.105	25.709	67.874	46.37	96.175	86.32	66.828	51.893	131.65	110.301	74.8225	31.6759
670.378	620.472	664.948	645.68	679.281	654.851	708.951	675.481	735.335	706.506		67.025	17.119	61.595	42.327	75.928	51.498	105.598	72.128	131.982	103.153	72.8353	33.5847
636.865	632.856	635.08	641.331	662.634	639.748	678.581	648.941	746.348	678.251		33.512	29.503	31.727	37.978	59.281	36.395	75.228	45.588	142.995	74.898	56.7105	34.8253
651.401	630.394	638.464	615.088	671.31	632.21	655.193	661.851	729.565	711.549		48.048	27.041	35.111	11.735	67.957	28.857	51.84	58.498	126.212	108.196	56.3495	36.2917
641.193	630.708	642.617	627.431	645.39	671.836	665.825	675.755	696.135	732.977		37.84	27.355	39.264	24.078	42.037	68.483	62.472	72.402	92.782	129.624	59.6337	32.9183
662.023	636.59	626.013	628.027	651.709	638.864	664.351	650.47	697.362	681.403		58.67	33.237	22.66	24.674	48.356	35.511	60.998	47.117	94.009	78.05	50.3282	23.1168
659.49	624.623	619.502	640.153	672.497	671.575	645.712	650.485	730.771	659.762		56.137	21.27	16.149	36.8	69.144	68.222	42.359	47.132	127.418	56.409	54.104	31.2953
678.188	580.498	577.304	688.099	670.347	642.514	664.315	627.822	701.622	731.71		74.835	-22.855	-26.049	84.746	66.994	39.161	60.962	24.469	98.269	128.357	52.8889	49.9777
663.471	603.11	613.364	715.466	652.356	634.763	684.155	655.588	702.41	731.794		60.118	-0.243	10.011	112.113	49.003	31.41	80.802	52.235	99.057	128.441	62.2947	42.7294
626.971	621.151	639.964	711.874	658.931	631.681	706.877	714.841	691.043	730.17		23.618	17.798	36.611	108.521	55.578	28.328	103.524	111.488	87.69	126.817	69.9973	41.907
646.528	617.061	616.152	684.962	686.451	614.579	759.984	708.891	692.926	691.982		43.175	13.708	12.799	81.609	83.098	11.226	156.631	105.538	89.573	88.629	68.5986	47.6088
639.742	612.711	610.052	691.115	675.384	610.802	724.961	742.317	669.333	658.201		36.389	9.358	6.699	87.762	72.031	7.449	121.608	138.964	65.98	54.848	60.1088	46.825
647.998	626.381	607.395	650.764	671.143	653.722	729.227	737.347	703.798	667.48		44.645	23.028	4.042	47.411	67.79	50.369	125.874	133.994	100.445	64.127	66.1725	42.3376
617.832	650.783	641.852	657.856	681.305	645.456	731.342	694.228	701.519	691.409		14.479	47.43	38.499	54.503	77.952	42.103	127.989	90.875	98.166	88.056	68.0052	34.228
630.553	662.571	645.884	651.791	690.435	634.676	698.104	715.817	686.814	687.209		27.2	59.218	42.531	48.438	87.082	31.323	94.751	112.464	83.461	83.856	67.0324	29.1665
668.863	667.531	650.774	672.618	644.605	666.396	670.933	711.87	652.291	715.704		65.51	64.178	47.421	69.265	41.252	63.043	67.58	108.517	48.938	112.351	68.8055	23.9249
636.653	652.351	629.68	648.696	676.223	621.607	685.208	690.05	682.535	695.455		33.3	48.998	26.327	45.343	72.87	18.254	81.855	86.697	79.182	92.102	58.4928	27.1971
635.857	655.724	624.357	653.196	689.766	638.78	648.631	723.155	674.098	712.443		32.504	52.371	21.004	49.843	86.413	35.427	45.278	119.802	70.745	109.09	62.2477	33.3456
658.971	653.775	644.997	672.976	685.376	668.775	695.112	723.214	664.482	718.193		55.618	50.422	41.644	69.623	82.023	65.422	91.759	119.861	61.129	114.84	75.2341	26.5305
709.432	701.931	621.338	679.812	672.283	670.442	686.043	742.023	689.025	697.871		106.079	98.578	17.985	76.459	68.93	67.089	82.69	138.67	85.672	94.518	83.667	31.1462
744.656	700.868	587.966	694.812	671.211	688.295	679.748	721.491	689.693	779.531		141.303	97.515	-15.387	91.459	67.858	84.942	76.395	118.138	86.34	176.178	92.4741	50.1869
736.652	714.121	586.711	658.883	659.476	670.825	629.989	718.901	710.712	771.165		133.299	110.768	-16.642	55.53	56.123	67.472	26.636	115.548	107.359	167.812	82.3905	54.7384
691.7	736.98	642.776	662.181	674.13	672.039	638.796	738.812	706.081	756.26		88.347	133.627	39.423	58.828	70.777	68.686	35.443	135.459	102.728	152.907	88.6225	41.3695
693.055	710.573	636.481	653.488	671.903	676.006	648.443	681.841	685.24	737.424		89.702	107.22	33.128	50.135	68.55	72.653	45.09	78.488	81.887	134.071	76.0924	30.0085
662.136	714.06	624.011	672.84	681.283	678.579	686.479	690.514	680.39	713.572		58.783	110.707	20.658	69.487	77.93	75.226	83.126	87.161	77.037	110.219	77.0334	25.706
626.663	714.227	598.444	689.409	691.618	702.593	697.416	677.331	691.521	714.496		23.31	110.874	-4.909	86.056	88.265	99.24	94.063	73.978	88.168	111.143	77.0188	38.0547
609.613	713.983	586.883	695.431	665.014	669.377	683.334	640.297	690.095	709.145		6.26	110.63	-16.47	92.078	61.661	66.024	79.981	36.944	86.742	105.792	62.9642	42.1928
611.234	675.429	598.119	670.595	629.806	641.685	672.181	680.432	715.531	666.617		7.881	72.076	-5.234	67.242	26.453	38.332	68.828	77.079	112.178	63.264	52.8099	35.5135
619.96	694.515	625.033	647.236	613.163	641.518	641.476	660.884	757.79	670.574		16.607	91.162	21.68	43.883	9.81	38.165	38.123	57.531	154.437	67.221	53.8619	43.0199
646.813	680.501	606.656	690.982	682.907	658.912	616.086	659.66	785.749	688.296		43.46	77.148	3.303	87.629	79.554	55.559	12.733	56.307	182.396	84.943	68.3032	49.5636
610.633	652.903	619.148	666.243	694.874	655.503	608.421	688.855	738.344	692.102		7.28	49.55	15.795	62.89	91.521	52.15	5.068	85.502	134.991	88.749	59.3496	42.1901
592.321	691.582	613.75	648.524	682.021	651.744	638.629	659.633	704.93	698.873		-11.032	88.229	10.397	45.171	78.668	48.391	35.276	56.28	101.577	95.52	54.8477	37.0525
634.576	734.319	589.959	643.757	693.128	717.994	651.071	671.514	737.951	718.074		31.223	130.966	-13.394	40.404	89.775	114.641	47.718	68.161	134.598	114.721	75.8813	49.1728
653.002	755.088	618.951	638.826	725.505	700.524	665.347	671.482	755.854	690.368		49.649	151.735	15.598	35.473	122.152	97.171	61.994	68.129	152.501	87.015	84.1417	46.9849
684.334	745.938	639.962	665.643	750.384	667.941	648.367	665.795	714.153	684.495		80.981	142.585	36.609	62.29	147.031	64.588	45.014	62.442	110.8	81.142	83.3482	38.319
689.942	777.542	635.489	679.3	736.908	658.26	659.865	701.719	730.723	702.778		86.589	174.189	32.136	75.947	133.555	54.907	56.512	98.366	127.37	99.425	93.8996	42.5551
642.342	753.537	671.773	654.016	768.092	667.506	646.956	686.021	718.024	703.803		38.989	150.184	68.42	50.663	164.739	64.153	43.603	82.668	114.671	100.45	87.854	43.9312
667.642	697.666	688.497	666.474	786.314	632.224	686.603	699.288	711.839	711.294		64.289	94.313	85.144	63.121	182.961	28.871	83.25	95.935	108.486	107.941	91.4311	40.1776
	655.872	717.263	690.952			691.392		738.641				52.519	113.91	87.599			88.039		135.288

## Sheet: par-6 deg 2
200311_par6aid_gip1_A_4										Background corrected	200311_par6aid_gip1_A_4
601.935	576.254	630.179	575.305	560.615	575.178	535.535	539.692	554.918	522.96		115.395	89.7138		88.765	74.075	88.6381	48.995		68.378	36.42
608.272	576.029	643.041	576.034	562.151	551.048	568.224	566.14	555.865	545.494		121.732	89.4894		89.494	75.611	64.5085	81.684		69.325	58.954	Average	Stdev
595.452	579.064	638.747	556.084	556.398	547.764	581.268	573.957	545.664	543.939		108.912	92.5242	143.639	69.544	69.858	61.2245	94.728	53.152	59.124	57.399	81.0105	28.8319
603.203	586.975	601.842	558.403	551.023	538.921	549.521	586.524	547.154	539.474		116.663	100.435	156.501	71.863	64.483	52.3807	62.981	79.6	60.614	52.934	81.8454	33.4134
575.575	586.994	597.591	557.381	555.987	553.308	578.134	565.616	552.322	545.671		89.035	100.454	152.207	70.841	69.447	66.7675	91.594	87.417	65.782	59.131	85.2676	27.1494
605.723	586.695	576.772	570.528	579.896	546.131	585.04	569.051	559.562	532.591		119.183	100.155	115.302	83.988	93.356	59.591	98.5	99.984	73.022	46.051	88.9132	23.4449
616.294	573.302	566.523	565.281	549.83	529.823	586.94	573.634	551.444	533.087		129.754	86.762	111.051	78.741	63.29	43.2831	100.4	79.076	64.904	46.547	80.3808	27.6422
613.437	574.431	541.029	567.196	537.385	549.837	569.659	559.993	540.542	546.041		126.897	87.8912	90.232	80.656	50.845	63.2965	83.119	82.511	54.002	59.501	77.8951	22.5181
594.396	586.474	556.547	547.232	528.085	572.443	563.023	547.86	538.4	534.613		107.856	99.9337	79.983	60.692	41.545	85.9035	76.483	87.094	51.86	48.073	73.9423	22.5257
589.414	604.585	574.204	572.74	536.493	598.098	576.354	543.282	537.413	529.319		102.874	118.045	54.489	86.2	49.953	111.558	89.814	73.453	50.873	42.779	78.0038	27.6721
589.85	591.962	588.899	589.088	542.212	585.744	589.001	557.307	549.44	514.348		103.31	105.422	70.007	102.548	55.672	99.204	102.461	61.32	62.9	27.808	79.0652	27.1204
603.225	621.855	583.453	581.917	543.438	560.833	584.554	545.58	539.012	526.389		116.685	135.315	87.664	95.377	56.898	74.293	98.014	56.742	52.472	39.849	81.3309	30.7039
608.619	620.16	560.84	578.462	558.477	573.153	567.204	541.513	528.326	534.539		122.079	133.62	102.359	91.922	71.937	86.6129	80.664	70.767	41.786	47.999	84.9746	29.2862
599.916	607.857	552.074	564.289	569.639	578.172	572.297	535.319	532.582	540.796		113.376	121.317	96.913	77.749	83.099	91.6315	85.757	59.04	46.042	54.256	82.9181	24.6313
583.587	603.265	556.762	578.428	574.956	577.511	596.898	536.855	539.166	527.764		97.047	116.725	74.3	91.888	88.416	90.9712	110.358	54.973	52.626	41.224	81.8528	25.3221
589.319	604.978	561.4	593.897	575.901	570.296	567.286	547.224	548.853	527.66		102.779	118.438	65.534	107.357	89.361	83.7556	80.746	48.779	62.313	41.12	80.0183	25.5072
592.907	594.768	557.94	608.048	565.047	589.25	545.421	528	541.088	539.228		106.367	108.228	70.222	121.508	78.507	102.71	58.881	50.315	54.548	52.688	80.3974	26.9731
599.092	601.654	538.766	585.632	556.292	585.176	573.754	523.261	560.519	527.174		112.552	115.114	74.86	99.092	69.752	98.6363	87.214	60.684	73.979	40.634	83.2517	23.6672
596.649	581.703	543.184	558.28	551.92	574.738	575.906	528.68	543.58	522.319		110.109	95.1629	71.4	71.74	65.38	88.1984	89.366	41.46	57.04	35.779	72.5635	23.7166
602.851	607.242	571.135	575.439	581.699	552.842	552.227	528.118	525.857	521.824		116.311	120.702	52.226	88.899	95.159	66.3024	65.687	36.721	39.317	35.284	71.6609	32.1115
605.496	612.84	566.768	593.74	570.536	565.193	536.745	529.327	542.269	518.996		118.956	126.3	56.644	107.2	83.996	78.6534	50.205	42.14	55.729	32.456	75.2279	33.1784
616.013	606.525	552.425	569.831	576.953	582.965	526.49	543.44	549.921	522.404		129.473	119.985	84.595	83.291	90.413	96.4246	39.95	41.578	63.381	35.864	78.4955	32.8943
603.678	599.778	569.305	559.259	550.397	577.352	523.045	553.871	536.999	535.592		117.138	113.238	80.228	72.719	63.857	90.8117	36.505	42.787	50.459	49.052	71.6795	28.5371
600.704	607.11	603.595	563.444	529.652	554.077	537.029	544.731	518.299	539.361		114.164	120.57	65.885	76.904	43.112	67.5371	50.489	56.9	31.759	52.821	68.0141	29.0054
617.819	602.488	583.647	564.371	558.314	563.552	562.595	547.136	543.731	546.556		131.279	115.948	82.765	77.831	71.774	77.0122	76.055	67.331	57.191	60.016	81.7202	23.7505
635.248	602.762	619.533	562.786	588.297	599.159	567.09	582.9	554.475	525.28		148.708	116.222	117.055	76.246	101.757	112.619	80.55	58.191	67.935	38.74	91.8023	33.1466
629.231	614.737	613.986	582.539	589.952	561.227	569.531	600.296	550.125	552.994		142.691	128.197	97.107	95.999	103.412	74.6866	82.991	60.596	63.585	66.454	91.5719	27.6434
603.466	618.838	616.102	578.749	593.828	569.385	608.643	622.366	551.788	557.659		116.926	132.298	132.993	92.209	107.288	82.8448	122.103	96.36	65.248	71.119	101.939	24.341
615.229	610.91	629.194	579.802	614.648	576.042	705.691	665.948	588.36	556.147		128.689	124.37	127.446	93.262	128.108	89.5021	219.151	113.756	101.82	69.607	119.571	40.2752
631.766	595.103	639.876	589.668	634.456	578.274	812.677	709.021	585.468	585.9		145.226	108.563	129.562	103.128	147.916	91.7337	326.137	135.826	98.928	99.36	138.638	69.0095
613.365	592.981	596.265	577.208	635.635	604.058	840.759	670.101	608.078	605.991		126.825	106.441	142.654	90.668	149.095	117.518	354.219	179.408	121.538	119.451	150.782	75.5514
635.413	619.396	574.47	581.914	646.713	593.932	838.224	655.202	631.324	582.523		148.873	132.856	153.336	95.374	160.173	107.392	351.684	222.481	144.784	95.983	161.294	76.6005
650.244	631.135	604.156	592.5	648.726	605.216	825.506	622.861	599.055	582.363		163.704	144.595	109.725	105.96	162.186	118.676	338.966	183.561	112.515	95.823	153.571	71.4575
652.783	654.761	626.663	596.671	626.26	604.902	813.879	621.223	566.622	589.906		166.243	168.221	87.93	110.131	139.72	118.362	327.339	168.662	80.082	103.366	147.006	71.4265
645.977	664.809	629.939	579.632	614.968	569.576	774.657	619.812	568.197	588.246		159.437	178.269	117.616	93.092	128.428	83.0359	288.117	136.321	81.657	101.706	136.768	62.04
629.576	625.375	616.518	583.242	609.54	564.835	771.682	610.367	553.937	582.248		143.036	138.835	140.123	96.702	123	78.2948	285.142	134.683	67.397	95.708	130.292	60.8887
654.388	606.338	635.34	579.318	619.428	572.239	689.393	571.029	570.244	566.471		167.848	119.798	143.399	92.778	132.888	85.6992	202.853	133.272	83.704	79.931	124.217	40.4235
644.356	631.32	635.407	578.87	591.919	570.795	653.614	577.098	586.104	550.846		157.816	144.78	129.978	92.33	105.379	84.2553	167.074	123.827	99.564	64.306	116.931	33.4276
633.367	600.513	617.702	603.339	567.875	596.413	635.828	599.1	566.574	538.985		146.827	113.973	148.8	116.799	81.335	109.873	149.288	84.489	80.034	52.445	108.386	33.5398
615.869	620.335	613.674	583.642	584.07	596.11	608.468	601.384	548.168	552.299		129.329	133.795	148.867	97.102	97.53	109.57	121.928	90.558	61.628	65.759	105.607	28.6683
615.551	648.427	599.643	593.142	590.949	589.818	621.273	597.049	548.472	548.395		129.011	161.887	131.162	106.602	104.409	103.278	134.733	112.56	61.932	61.855	110.743	31.3241
615.206	662.771	583.896	570.236	606.631	622.534	596.097	605.103	553.644	540.492		128.666	176.231	127.134	83.696	120.091	135.994	109.557	114.844	67.104	53.952	111.727	35.7045
630.355	656.545	601.177	576.057	598.717	626.165	588.468	578.761	577.49	516.031		143.815	170.005	113.103	89.517	112.177	139.625	101.928	110.509	90.95	29.491	110.112	37.9555
652.758	637.34	603.719	604.192	596.028	624.785	558.014	531.132	573.694	508.645		166.218	150.8	97.356	117.652	109.488	138.245	71.474	118.563	87.154	22.105	107.906	41.637
618.158	642.227	610.491	637.161	604.741	606.731	547.501	512.172	577.798	534.996		131.618	155.687	114.637	150.621	118.201	120.191	60.961	92.221	91.258	48.456	108.385	35.3256
600.692	631.058	591.183	632.296	612.737	567.31	539.58	530.75	564.59	559.941		114.152	144.518	117.179	145.756	126.197	80.7701	53.04	44.592	78.05	73.401	97.7655	36.5781
619.983	607.62	574.2	636.523	612.556	552.424	531.259	540.315	572.484	553.826		133.443	121.08	123.951	149.983	126.016	65.884	44.719	25.632	85.944	67.286	94.3938	42.1842
616.844	594.304	582.772	587.867	624.299	564.028	555.244	564.195	588.927	550.103		130.304	107.764	104.643	101.327	137.759	77.488	68.704	44.21	102.387	63.563	93.8149	29.7718
628.196	621.239	595.681	594.342	611.434	561.253	564.456	576.646	595.399	556.159		141.656	134.699	87.66	107.802	124.894	74.7125	77.916	53.775	108.859	69.619	98.1592	29.8209
649.619	623.769	593.393	637.932	636.747	556.197	551.962	573.383	568.225	575.316		163.079	137.229	96.232	151.392	150.207	69.6569	65.422	77.655	81.685	88.776	108.133	37.9424
677.248	594.686	580.643	609.936	649.618	550.343	543.013	570.832	565.231	566.159		190.708	108.146	109.141	123.396	163.078	63.8027	56.473	90.106	78.691	79.619	106.316	43.0469
648.315	581.245	556.57	613.539	625.209	563.061	544.363	583.995	557.586	581.925		161.775	94.7055	106.853	126.999	138.669	76.5209	57.823	86.843	71.046	95.385	101.662	32.4049
635.013	593.017	563.029	594.604	582.618	563.622	549.198	583.39	556.35	592.362		148.473	106.477	94.103	108.064	96.078	77.0818	62.658	84.292	69.81	105.822	95.2858	24.4864
664.177	607.094	585.369	603.704	592.272	572.712	575.37	567.635	574.739	627.567		177.637	120.554	70.03	117.164	105.732	86.1719	88.83	97.455	88.199	141.027	109.28	31.5513
681.589	613.043	589.326	605.437	604.882	602.35	571.375	564.009	558.32	629.12		195.049	126.503	76.489	118.897	118.342	115.81	84.835	96.85	71.78	142.58	114.713	36.389
671.673	616.32	609.981	610.762	610.149	588.692	565.118	560.971	571.542	607.879		185.133	129.78	98.829	124.222	123.609	102.151	78.578	81.095	85.002	121.339	112.974	31.7944
665.126	581.004	589.81	620.634	602.577	579.096	554.378	542.027	583.091	629.095		178.586	94.4642	102.786	134.094	116.037	92.5564	67.838	77.469	96.551	142.555	110.294	33.324
657.974	606.935	581.392	644.356	591.513	589.444	555.393	528.021	577.365	617.607		171.434	120.395	123.441	157.816	104.973	102.904	68.853	74.431	90.825	131.067	114.614	33.3028
664.003	614.046	614.47	649.211	569.523	579.275	550.676	528.772	544.895	626.55		177.463	127.506	103.27	162.671	82.983	92.7349	64.136	55.487	58.355	140.01	106.462	43.7455
669.213	631.366	647.256	657.571	571.468	571.078	559.244	524.1	558.352	610.662		182.673	144.826	94.852	171.031	84.928	84.5384	72.704	41.481	71.812	124.122	107.297	46.423
683.454	618.389	642.586	639.679	601.862	597.737	548.189	542.406	585.224	587.354		196.914	131.849	127.93	153.139	115.322	111.197	61.649	42.232	98.684	100.814	113.973	43.7525
679.925	608.649	602.402	640.056	581.875	605.102	547.33	572.867	578.415	601.271		193.385	122.109	160.716	153.516	95.335	118.562	60.79	37.56	91.875	114.731	114.858	46.7118
684.816	614.626	582.339	618.864	577.236	601.048	538.195	619.37	614.413	601.985		198.276	128.086	156.046	132.324	90.696	114.508	51.655	55.866	127.873	115.445	117.078	43.861
													115.862					86.327
													95.799					132.83

## Sheet: par-6 deg 3
200311_par6aid_gip1_A_5										Background corrected
642.168	667.982	593.475	584.27	604.618	584.252	580.948	587.179	573.968	598.883							23.378		26.305
662.945	643.349	622.234	580.883	585.417	595.194	582.974	592.848	585.735	600.174			107.108	32.601	23.396	43.744	34.32		31.974	13.094
659.889	663.631	610.665	577.839	573.927	572.284	625.792	627.31	609.211	615.681		81.294	82.475	61.36	20.009	24.543	11.41	20.074	66.436	24.861		Average	Stdev
623.185	674.972	620.809	618.011	578.392	589.777	621.153	654.738	631.431	617.221		102.071	102.757	49.791	16.965	13.053	28.903	22.1	93.864	48.337	38.009	51.585	35.3083
619.161	664.309	614.537	649.224	598.808	593.833	644.654	672.581	615.071	595.998		99.015	114.098	59.935	57.137	17.518	32.959	64.918	111.707	70.557	39.3	66.7144	32.9643
633.471	675.689	626.203	638.849	584.845	618.206	629.162	616.694	594.753	602.403		62.311	103.435	53.663	88.35	37.934	57.332	60.279	55.82	54.197	54.807	62.8128	18.9412
635.263	681.109	635.891	623.142	578.026	601.878	656.974	606.803	587.772	629		58.287	114.815	65.329	77.975	23.971	41.004	83.78	45.929	33.879	56.347	60.1316	26.8266
632.647	653.631	614.855	606.411	570.644	571.544	657.214	636.064	603.985	622.067		72.597	120.235	75.017	62.268	17.152	10.67	68.288	75.19	26.898	35.124	56.3439	33.611
626.787	678.343	604.215	603.898	592.201	587.345	651.485	641.805	607.944	587.813		74.389	92.757	53.981	45.537	9.77	26.471	96.1	80.931	43.111	41.529	56.4576	28.7034
641.239	687.856	636.651	567.424	588.877	574.044	643.093	629.473	600.62	617.51		71.773	117.469	43.341	43.024	31.327	13.17	96.34	68.599	47.07	68.126	60.0239	31.0017
637.471	719.666	632.278	565.324	581.253	569.091	645.766	629.563	626.321	641.048		65.913	126.982	75.777	6.55	28.003	8.217	90.611	68.689	39.746	61.193	57.1681	37.5302
629.037	682.207	614.091	559.863	572.592	588.647	628.9	645.69	621.215	611.741		80.365	158.792	71.404	4.45	20.379	27.773	82.219	84.816	65.447	26.939	62.2584	44.9445
628.993	667.415	592.398	568.712	573.118	577.834	615.324	658.697	623.988	586.569		76.597	121.333	53.217	-1.011	11.718	16.96	84.892	97.823	60.341	56.636	57.8506	39.447
654.107	650.205	605.816	596.33	563.069	578.128	579.466	620.98	621.758	571.809		68.163	106.541	31.524	7.838	12.244	17.254	68.026	60.106	63.114	80.174	51.4984	32.712
639.367	645.69	603.152	587.744	555.545	586.329	574.604	633.808	595.907	579.008		68.119	89.331	44.942	35.456	2.195	25.455	54.45	72.934	60.884	50.867	50.4633	25.0842
630.746	660.07	611.437	574.493	574.094	578.691	580.82	615.445	613.189	572.677		93.233	84.816	42.278	26.87	-5.329	17.817	18.592	54.571	35.033	25.695	39.3576	30.6638
584.077	598.89	615.011	565.271	584.501	589.209	586.084	620.63	631.575	556.288		78.493	99.196	50.563	13.619	13.22	28.335	13.73	59.756	52.315	10.935	42.0162	31.0606
589.517	598.662	588.767	588.416	572.049	585.394	585.701	637.485	623.28	570.201		69.872	38.016	54.137	4.397	23.627	24.52	19.946	76.611	70.701	18.134	39.9961	25.8942
601.018	608.291	591.423	608.333	578.539	576.48	632.849	675.82	622.131	579.373		23.203	37.788	27.893	27.542	11.175	15.606	25.21	114.946	62.406	11.803	35.7572	31.5656
611.498	617.458	588.493	622.035	579.214	541.814	635.41	701.219	606.832	567.774		28.643	47.417	30.549	47.459	17.665	-19.06	24.827	140.345	61.257	-4.586	37.4516	43.4486
627.699	619.361	565.501	635.95	575.887	545.742	603.323	664.478	590.283	595.172		40.144	56.584	27.619	61.161	18.34	-15.132	71.975	103.604	45.958	9.327	41.958	33.9782
628.669	605.242	585.256	631.879	583.189	576.486	588.538	608.065	608.084	629.628		50.624	58.487	4.627	75.076	15.013	15.612	74.536	47.191	29.409	18.499	38.9074	25.7387
628.409	615.676	593.946	617.667	611.158	576.295	583.524	591.495	644.328	650.305		66.825	44.368	24.382	71.005	22.315	15.421	42.449	30.621	47.21	6.9	37.1496	21.1373
620.266	595.572	601.327	627.082	614.812	583.089	591.434	596.568	625.787	664.012		67.795	54.802	33.072	56.793	50.284	22.215	27.664	35.694	83.454	34.298	46.6071	19.4327
624.452	623.816	594.991	659.345	620.321	586.853	582.782	599.014	634.504	676.927		67.535	34.698	40.453	66.208	53.938	25.979	22.65	38.14	64.913	68.754	48.3268	18.0209
644.11	651.159	615.016	704.242	655.513	610.434	618.932	602.44	658.202	739.499		59.392	62.942	34.117	98.471	59.447	49.56	30.56	41.566	73.63	89.431	59.9116	22.4269
675.624	653.441	653.876	681.28	682.013	643.47	650.286	611.095	704.132	811.565		63.578	90.285	54.142	143.368	94.639	82.596	21.908	50.221	97.328	103.138	80.1203	33.9568
705.402	692.661	704.715	682.611	679.711	659.622	674.633	624.014	739.572	811.379		83.236	92.567	93.002	120.406	121.139	98.748	58.058	63.14	143.258	116.053	98.9607	26.8453
707.409	741.4	759.813	723.309	735.218	648.434	693.262	643.258	732.613	778.694		114.75	131.787	143.841	121.737	118.837	87.56	89.412	82.384	178.698	178.625	124.763	34.6373
676.02	737.377	806.253	759.301	800.564	666.441	676.752	627.631	742.756	725.198		144.528	180.526	198.939	162.435	174.344	105.567	113.759	66.757	171.739	250.691	156.929	52.1242
655.433	702.434	764.382	690.266	768.252	687.335	650.957	620.809	737.363	676.115		146.535	176.503	245.379	198.427	239.69	126.461	132.388	59.935	181.882	250.505	175.77	61.1497
639.809	677.728	697.348	646.403	717.386	649.37	627.251	604.843	705.618	648.867		115.146	141.56	203.508	129.392	207.378	88.496	115.878	43.969	176.489	217.82	143.964	56.7573
621.956	646.937	652.27	596.678	634.071	639.297	612.32	604.41	671.585	625.068		94.559	116.854	136.474	85.529	156.512	78.423	90.083	43.536	144.744	164.324	111.104	39.0239
585.952	628.683	632.091	593.105	606.686	603.784	592.794	604.507	642.243	616.002		78.935	86.063	91.396	35.804	73.197	42.91	66.377	43.633	110.711	115.241	74.4267	27.7401
603.244	627.591	649.765	581.847	607.469	614.4	580.211	595.39	651.739	601.68		61.082	67.809	71.217	32.231	45.812	53.526	51.446	34.516	81.369	87.993	58.7001	18.7031
583.59	621.097	637.929	558.766	600.454	596.904	587.831	592.071	652.739	577.947		25.078	66.717	88.891	20.973	46.595	36.03	31.92	31.197	90.865	64.194	50.246	25.8492
589.49	623.375	625.115	573.263	594.456	586.425	564.085	630.922	655.181	579.785		42.37	60.223	77.055	-2.108	39.58	25.551	19.337	70.048	91.865	55.128	47.9049	28.6618
596.949	621.031	618.596	592.998	595.943	625.525	590.98	646.643	656.758	588.336		22.716	62.501	64.241	12.389	33.582	64.651	26.957	85.769	94.307	40.806	50.7919	27.5964
590.42	609.454	652.267	585.071	602.439	655.262	572.883	637.309	632.04	583.915		28.616	60.157	57.722	32.124	35.069	94.388	3.211	76.435	95.884	17.073	50.0679	31.9902
607.025	646.202	624.984	604.079	629.048	666.528	608.401	623.883	565.201	589.775		36.075	48.58	91.393	24.197	41.565	105.654	30.106	63.009	71.166	18.911	53.0656	29.115
613.998	630.194	613.332	607.736	655.049	635.384	637.897	615.486	560.405	617.53		29.546	85.328	64.11	43.205	68.174	74.51	12.009	54.612	4.327	27.462	46.3283	27.4196
604.176	607.387	605.744	577.798	650.435	620.884	663.931	610.956	566.765	615.653		46.151	69.32	52.458	46.862	94.175	60.01	47.527	50.082	-0.469	23.041	48.9157	25.2188
620.388	598.239	592.037	581.996	591.271	618.15	656.782	591.75	573.758	643.719		53.124	46.513	44.87	16.924	89.561	57.276	77.023	30.876	5.891	28.901	45.0959	25.8339
641.108	629.412	579.454	585.991	586.342	601.267	652.328	594.753	579.149	629.693		43.302	37.365	31.163	21.122	30.397	40.393	103.057	33.879	12.884	56.656	41.0218	24.8565
632.43	642.035	584.246	611.727	586.346	583.401	653.861	602.029	603.631	602.92		59.514	68.538	18.58	25.117	25.468	22.527	95.908	41.155	18.275	54.779	42.9861	26.0774
616.212	664.607	618.315	609.75	588.383	596.196	631.603	605.3	580.58	617.035		80.234	81.161	23.372	50.853	25.472	35.322	91.454	44.426	42.757	82.845	55.7896	25.7283
618.183	685.774	645.74	606.442	562.835	607.611	618.106	587.159	563.59	595.384		71.556	103.733	57.441	48.876	27.509	46.737	92.987	26.285	19.706	68.819	56.3649	28.2883
595.585	672.186	636.385	616.74	559.079	633.099	615.316	581.694	565.697	592.754		55.338	124.9	84.866	45.568	1.961	72.225	70.729	20.82	2.716	42.046	52.1169	38.3129
603.491	631.539	606.316	618.122	575.301	647.186	621.1	579.788	570.579	608.422		57.309	111.312	75.511	55.866	-1.795	86.312	57.232	18.914	4.823	56.161	52.1645	35.8233
603.754	617.733	615.302	590.816	597.34	654.204	619.213	576.352	592.828	600.949		34.711	70.665	45.442	57.248	14.427	93.33	54.442	15.478	9.705	34.51	42.9958	26.7946
609.276	618.113	617.389	586.697	584.095	677.483	619.498	561.447	578.582	598.57		42.617	56.859	54.428	29.942	36.466	116.609	60.226	0.573	31.954	31.88	46.1554	30.1795
609.61	622.675	617.849	592.597	590.364	660.847	573.075	581.266	564.999	614.451		42.88	57.239	56.515	25.823	23.221	99.973	58.339	20.392	17.708	47.548	44.9638	25.1348
604.088	620.634	607.461	586.952	588.892	666.91	595.048	589.388	576.714	600.985		48.402	61.801	56.975	31.723	29.49	106.036	58.624	28.514	4.125	40.075	46.5765	27.2989
595.25	600.457	584.467	606.924	610.231	649.168	589.985	609.124	594.743	593.388		48.736	59.76	46.587	26.078	28.018	88.294	12.201	48.25	15.84	37.696	41.146	22.5994
618.19	593.255	611	642.244	662.377	616.742	587.57	626.942	568.174	629.072		43.214	39.583	23.593	46.05	49.357	55.868	34.174	66.068	33.869	53.577	44.5353	12.4068
641.875	604.166	614.076	617.079	671.31	638.753	558.621	625.024	571.914	594.281		34.376	32.381	50.126	81.37	101.503	77.879	29.111	64.15	7.3	40.111	51.8307	28.8532
667.127	617.398	622.982	621.291	680.304	634.051	583.635	616.441	590.003	599.495		57.316	43.292	53.202	56.205	110.436	73.177	26.696	55.567	11.04	32.514	51.9445	27.2781
647.227	656.026	646.567		683.588	636.836	562.12	638.934	587.066	577.602		81.001	56.524	62.108	60.417	119.43	75.962	-2.253	78.06	29.129	68.198	62.8576	32.2914
611.065	657.373	629.912				583.329					106.253	95.152	85.693		122.714		22.761		26.192	33.407
											86.353	96.499	69.038				1.246			38.621
											50.191						22.455			16.728

## Sheet: par-6 deg 4
200311_par6aid_gip1_A_3										Background corrected
566.982	545.076	511.547	613.654	628.318	571.23	553.117	523.763	541.052	545.308											48.806
576.385	562	502.501	638.38	631.743	554.578	558.443	541.36	536.298	548.941											52.439	Average	Stdev
583.683	554.242	509.709	648.821	606.661	559.578	533.587	554.61	552.122	534.533						131.816		56.615	27.261		38.031
586.346	563.77	531.45	668.044	597.878	577.716	549.717	537.542	541.973	528.595					117.152	135.241		61.941	44.858	44.55	32.093
563.639	562.467	530.993	613.459	613.227	554.639	558.9	550.499	514.864	508.762					141.878	110.159		37.085	58.108	39.796	12.26
541.877	550.493	503.761	593.18	608.043	561.441	534.036	557.94	508.981	548.76					152.319	101.376		53.215	41.04	55.62	52.258
553.662	546.111	492.5	589.364	591.931	579.515	539.501	563.378	526.994	536.771					171.542	116.725	74.728	62.398	53.997	45.471	40.269	80.7329	47.4508
537.592	557.095	498.167	585.938	583.998	600.144	531.091	556.614	545.94	562.819					116.957	111.541	58.076	37.534	61.438	18.362	66.317	67.175	36.1117
542.642	539.798	515.892	595.525	583.513	573.944	522.292	536.452	578.143	558.692			48.574		96.678	95.429	63.076	42.999	66.876	12.479	62.19	61.0376	27.5972
532.333	554.415	499.316	586.159	588.58	570.409	514.119	534.924	552.63	552.205			65.498		92.862	87.496	81.214	34.589	60.112	30.492	55.703	63.4958	23.1559
524.904	567.369	492.036	614.403	600.249	571.323	527.069	540.553	552.545	592.876		70.48	57.74	15.045	89.436	87.011	58.137	25.79	39.95	49.438	96.374	58.9401	27.3479
515.668	543.967	525.837	583.612	619.37	590.718	538.842	550.569	543.284	549.51		79.883	67.268	5.999	99.023	92.078	64.939	17.617	38.422	81.641	53.008	59.9878	31.1263
524.468	556.911	543.854	620.958	635.833	620.969	574.619	555.671	528.883	518.548		87.181	65.965	13.207	89.657	103.747	83.013	30.567	44.051	56.128	22.046	59.5562	31.3778
515.007	556.153	524.93	628.109	647.06	617.346	560.703	585.13	538.96	530.054		89.844	53.991	34.948	117.901	122.868	103.642	42.34	54.067	56.043	33.552	70.9196	34.3734
532.679	530.874	532.405	623.777	590.951	613.857	560.648	595.152	560.509	522.326		67.137	49.609	34.491	87.11	139.331	77.442	78.117	59.169	46.782	25.824	66.5012	32.3027
521.865	556.455	532.092	623.109	590.202	647.884	543.886	584.318	570.272	539.263		45.375	60.593	7.259	124.456	150.558	73.907	64.201	88.628	32.381	42.761	69.0119	42.9853
542.095	556.088	546.612	661.114	621.803	623.477	570.078	600.359	545.088	526.093		57.16	43.296	-4.002	131.607	94.449	74.821	64.146	98.65	42.458	29.591	63.2176	38.8118
512.774	558.522	545.499	685.543	592.401	635.752	552.711	605.676	558.842	529.35		41.09	57.913	1.665	127.275	93.7	94.216	47.384	87.816	64.007	32.848	64.7914	36.5967
506.212	557.584	552.206	649.161	584.483	655.877	577.587	567.013	538.064	531.996		46.14	70.867	19.39	126.607	125.301	124.467	73.576	103.857	73.77	35.494	79.9469	39.0657
534.815	578.117	536.927	596.144	595.02	653.54	565.424	574.064	546.834	546.667		35.831	47.465	2.814	164.612	95.899	120.844	56.209	109.174	48.586	50.165	73.1599	48.1589
546.516	564.078	540.427	575.909	608.98	633.906	545.036	553.059	591.921	551.389		28.402	60.409	-4.466	189.041	87.981	117.355	81.085	70.511	62.34	54.887	74.7545	51.949
535.25	536.102	539.234	599.868	610.331	664.837	564.675	563.862	578.988	596.769		19.166	59.651	29.335	152.659	98.518	151.382	68.922	77.562	41.562	100.267	79.9024	46.4474
531.686	529.051	594.43	600.664	582.041	640.057	563.45	565.459	576.273	539.202		27.966	34.372	47.352	99.642	112.478	126.975	48.534	56.557	50.332	42.7	64.6908	34.9127
554.791	539.892	578.877	587.693	609.449	612.828	576.946	555.895	552.062	525.087		18.505	59.953	28.428	79.407	113.829	139.25	68.173	67.36	95.419	28.585	69.8909	38.955
554.697	569.314	595.497	620.445	621.858	628.606	618.014	523.686	584.149	512.254		36.177	59.586	35.903	103.366	85.539	159.375	66.948	68.957	82.486	15.752	71.4089	40.6161
555.156	585.132	592.431	604.92	628.844	639.08	585.624	523.161	545.269	516.291		25.363	62.02	35.59	104.162	112.947	157.038	80.444	59.393	79.771	19.789	73.6517	42.8591
560.559	636.192	581.59	635.769	617.591	609.735	587.162	543.76	556.429	550.703		45.593	61.082	50.11	91.191	125.356	137.404	121.512	27.184	55.56	54.201	76.9193	38.8638
568.238	624.171	574.39	641.692	654.724	659.22	611.362	555.311	548.7	552.978		16.272	81.615	48.997	123.943	132.342	168.335	89.122	26.659	87.647	56.476	83.1408	48.2361
563.658	660.358	569.091	638.463	670.872	712.597	615.266	619.678	567.83	565.883		9.71	67.576	55.704	108.418	121.089	143.555	90.66	47.258	48.767	69.381	76.2118	39.9317
535.616	629.866	556.218	617.744	670.151	695.012	620.597	669.553	614.809	550.838		38.313	39.6	40.425	139.267	158.222	116.326	114.86	58.809	59.927	54.336	82.0085	45.427
539.604	596.559	542.192	653.264	745.296	680.449	658.477	700.674	649.574	586.2		50.014	32.549	43.925	145.19	174.37	132.104	118.764	123.176	52.198	89.698	96.1988	49.3651
547.277	604.708	543.288	653.09	727.198	651.4	699.453	781.093	648.095	577.952		38.748	43.39	42.732	141.961	173.649	142.578	124.095	173.051	71.328	81.45	103.298	53.9633
563.784	598.208	526.711	670.106	696.048	646.298	754.402	751.243	648.671	607.336		35.184	72.812	97.928	121.242	248.794	113.233	161.975	204.172	118.307	110.834	128.448	62.1493
548.506	580.42	518.174	640.56	730.277	613.939	734.689	751.562	610.776	679.628		58.289	88.63	82.375	156.762	230.696	162.718	202.951	284.591	153.072	183.126	160.321	70.2612
562.012	599.89	529.885	587.115	731.567	597.36	638.753	673.797	577.878	682.209		58.195	139.69	98.995	156.588	199.546	216.095	257.9	254.741	151.593	185.707	171.905	64.2002
572.915	614.698	527.783	586.875	689.604	580.356	636.83	614.491	567.556	680.248		58.654	127.669	95.929	173.604	233.775	198.51	238.187	255.06	152.169	183.746	171.73	64.0582
558.24	585.226	521.615	616.673	668.453	554.162	590.473	594.91	541.929	614.835		64.057	163.856	85.088	144.058	235.065	183.947	142.251	177.295	114.274	118.333	142.822	50.3152
551.901	574.056	537.14	614.761	608.783	576.47	562.642	571.129	551.513	593.935		71.736	133.364	77.888	90.613	193.102	154.898	140.328	117.989	81.376	97.433	115.873	39.3768
546.476	580.857	536.649	598.698	601.199	580.401	547.737	566.625	544.419	573.566		67.156	100.057	72.589	90.373	171.951	149.796	93.971	98.408	71.054	77.064	99.2419	34.9228
552.261	639.637	575.16	589.085	572.508	574.495	600.334	578.378	550.29	542.703		39.114	108.206	59.716	120.171	112.281	117.437	66.14	74.627	45.427	46.201	78.932	32.4606
581.622	614.489	566.152	598.242	568.864	583.735	579.76	555.116	595.943	561.292		43.102	101.706	45.69	118.259	104.697	100.858	51.235	70.123	55.011	64.79	75.5471	28.0892
558.534	656.509	558.623	633.352	574.026	554.158	550.434	568.334	548.282	596.4		50.775	83.918	46.786	102.196	76.006	83.854	103.832	81.876	47.917	99.898	77.7058	22.2116
600.363	680.795	577.658	649.394	587.729	578.295	500.412	559.444	547.881	637.279		67.282	103.388	30.209	92.583	72.362	57.66	83.258	58.614	53.788	140.777	75.9921	30.8975
608.102	627.397	596.927	624.294	573.745	602.449	520.474	524.54	554.653	617.3		52.004	118.196	21.672	101.74	77.524	79.968	53.932	71.832	99.441	120.798	79.7107	31.4669
610.755	651.065	592.968	616.129	569.471	617.577	555.36	546.456	553.543	610		65.51	88.724	33.383	136.85	91.227	83.899	3.91	62.942	51.78	113.498	73.1723	38.5362
566.123	603.302	566.487	624.96	593.616	631.855	551.511	559.664	560.835	641.375		76.413	77.554	31.281	152.892	77.243	77.993	23.972	28.038	51.379	144.873	74.1638	45.0228
586.076	610.981	549.167	597.36	603.557	649.924	546.821	535.616	538.682	671.707		61.738	84.355	25.113	127.792	72.969	87.233	58.858	49.954	58.151	175.205	80.1368	43.001
576.552	582.295	547.917	572.808	606.853	682.042	548.715	541.161	519.562	628.572		55.399	143.135	40.638	119.627	97.114	57.656	55.009	63.162	57.041	132.07	82.0851	37.4255
579.196	575.253	552.365	595.016	583.154	683.208	551.932	585.107	514.049	619.306		49.974	117.987	40.147	128.458	107.055	81.793	50.319	39.114	64.333	122.804	80.1984	35.9723
555.915	598.493	537.748	632.612	573.944	678.763	594.171	607.232	505.204	586.417		55.759	160.007	78.658	100.858	110.351	105.947	52.213	44.659	42.18	89.915	84.0547	37.1265
536.381	640.223	520.899	647.717	587.654	651.663	593.376	656.715	532.711	534.694		85.12	184.293	69.65	76.306	86.652	121.075	55.43	88.605	23.06	38.192	82.8383	45.145
524.193	670.94	524.097	638.189	528.511	668.124	581.182	718.073	539.3	548.584		62.032	130.895	62.121	98.514	77.442	135.353	97.669	110.73	17.547	52.082	84.4385	37.0966
564.883		547.169	637.001	549.463	680.019	548.105	707.351	571.835	574.735		103.861	154.563	81.156	136.11	91.152	153.422	96.874	160.213	8.702	78.233	106.429	46.6839
538.553			626.11	582.802	690.629	538.722	672.716	567.115	586.493		111.6	106.8	100.425	151.215	32.009	185.54	84.68	221.571	36.209	89.991	112.004	60.0801
			629.359	602.747	692.606	542.85	652.235	579.717	548.153		114.253	114.479	96.466	141.687	52.961	186.706	51.603	210.849	42.798	51.651	106.345	59.3769
			624.781	595.981	687.812	542.128	632.61	565.443	574.983		69.621	85.793	69.985	140.499	86.3	182.261	42.22	176.214	75.333	78.481	100.671	48.1139
			652.747	619.102	709.13	539.387	627.462	560.519	568.032		89.574	78.751	52.665	129.608	106.245	155.161	46.348	155.733	70.613	71.53	95.6228	39.7582
			643.858	604.418	686.952	524.264	572.096	546.83	576.492		80.05	101.991	51.415	132.857	99.479	171.622	45.626	136.108	83.215	79.99	98.2353	39.2759
			617.51	633.833	674.666	545.868	611	584.388	572.362		82.694	143.721	55.863	128.279	122.6	183.517	42.885	130.96	68.941	75.86	103.532	44.8305
			638.188	679.081	676.289	524.428	594.349	536.062	558.033		59.413	174.438	41.246	156.245	107.916	194.127	27.762	75.594	64.017	61.531	96.2289	58.8528
			627.687	687.746	687.894	523.475	566.343	553.308	560.695		39.879		24.397	147.356	137.331	196.104	49.366	114.498	50.328	64.193	91.4947	59.2399
			625.854	666.014	683.216	526.571	532.707	532.505	538.066		27.691		27.595	121.008	182.579	191.31	27.926	97.847	87.886	41.564	89.4896	65.0344
			611.725	661.11	694.658	524.729	550.404	547.562	525.069		68.381		50.667	141.686	191.244	212.628	26.973	69.841	39.56	28.567	92.1719	71.264
			615.516	690.747		522.282	550.073	547.902	528.79		42.051			131.185	169.512	190.45	30.069	36.205	56.806	32.288	86.0708	66.7643
			591.369						534.695					129.352	164.608	178.164	28.227	53.902	36.003	38.193	89.7784	65.3275
														115.223	194.245	179.787	25.78	53.571	51.06
														119.014		191.392			51.4
														94.867		186.714
																198.156

[truncated: 3 more sheets: par-6 deg 5, par-6 deg 6, Averages]
