# Supplementary material for: Epidermal PAR-6 and PKC-3 are essential for larval development of C. elegans and organize non-centrosomal microtubules
Source: eLife journal article supplement (doi:10.7554/elife.62067), 2020-12-10
Supplement: fig6-data1 [file 200311_P6aid_noca1_L3_shortdeg.xlsx]

## Sheet: pwrt2_auxin
200311_pra6aid_noca1_pwrt2_A_8	200311_pra6aid_noca1_pwrt2_A_9	200311_pra6aid_noca1_pwrt2_A_7	200311_pra6aid_noca1_pwrt2_A_4	200311_pra6aid_noca1_pwrt2_A_3	200311_pra6aid_noca1_pwrt2_A_5	200311_pra6aid_noca1_pwrt2_A_1	200311_pra6aid_noca1_pwrt2_A_6	200311_pra6aid_noca1_pwrt2_A_2	200311_pra6aid_noca1_pwrt2_A_10
				554.587
				565.595
				582.556
				578.21
				563.641
	518.977			563.821
	471.797			515.281
	458.246	515.361		497.586
	472.114	558.902		519.679
	466.838	567.797		532.681			532.89		607.152
	466.059	559.486		533.445			531.202		536.721
588.471	464.104	595.243		577.365	498.768		526		554.224
607.001	493.947	586.655		562.752	501.413		545.129		518.389
568.516	500.15	557.682		584.454	501.386	523.635	539.238		569.56
560.546	506.258	563.343		544.57	509.383	499.527	535.65		501.127
565.572	529.35	593.342	623.709	592.466	546.802	526.573	546.502		530.548
579.148	534.504	579.062	625.751	559.21	525.147	540.643	563.714		575.136
555.622	501.484	554.229	635.691	563.923	486.61	515.051	594.319		520.295
537.138	505.074	565.28	633.821	580.229	509.755	526.177	623.534		509.658	Averages	Stdev
519.035	506.78	592.484	658.127	599.892	512.5	496.199	570.793	576.576	573.415	560.58	51.2951
592.107	541.371	534.195	612.596	606.352	545.214	486.224	604.202	608.465	537.932	566.866	43.3826
555.014	537.521	543.21	613.685	595.911	537.486	516.33	611.311	582.492	546.814	563.977	34.2411
554.915	543.336	535.686	571.589	623.021	574.411	577.264	602.547	601.945	559.898	574.461	27.8583
538.339	533.05	507.105	593.366	579.024	539.539	495.736	630.134	579.221	554.264	554.978	40.9417
549.608	507.148	493.265	645.365	607.744	544.732	508.168	664.398	605.881	534.458	566.077	60.6707
533.217	500.63	502.395	629.351	628.853	535.451	537.553	578.808	596.637	578.844	562.174	47.4003
558.551	500.732	553.484	639	549.137	526.082	523.751	627.285	605.163	544.252	562.744	46.0921
569.577	497.797	513.917	600.903	557.435	533.531	495.165	640.67	600.616	532.496	554.211	48.5879
513.494	518.69	528.115	604.121	536.794	564.646	499.677	600.947	585.957	573.014	552.545	37.9996
571.34	516.426	528.434	654.985	559.011	547.057	494.511	594.527	596.498	595.414	565.82	47.073
565.897	503.158	505.74	583.482	604.867	550.165	524.72	672.139	603.393	572.123	568.568	51.6255
540.715	506.354	534.116	629.58	546.108	534.812	512.7	675.874	662.285	567.785	571.033	61.9662
551.913	500.685	535.894	642.94	540.302	506.86	506.566	664.53	702.066	539.485	569.124	72.8839
566.383	494.739	538.25	612.653	547.735	527.717	479.256	655.423	672.418	569.801	566.438	63.8421
555.486	496.847	539.607	591.629	539.838	531.12	475.446	626.425	643.222	553.326	555.295	52.6795
570.077	473.388	496.056	632.279	587.65	525.063	518.801	644.263	606.273	614.037	566.789	59.9067
565.12	469.265	519.075	644.785	581.811	551.518	528.686	670.218	594.43	614.972	573.988	60.5983
553.654	511.576	491.024	651.537	571.191	510.503	516.538	603.925	587.81	591.774	558.953	51.3024
574.335	503.227	525.357	636.252	602.102	508.834	482.601	630.927	634.138	612.886	571.066	60.483
573.968	521.598	552.331	656.611	578.275	492.079	506.285	634.008	613.055	636.032	576.424	57.9944
566.302	577.398	548.607	664.839	550.552	572.627	480.975	603.518	576.405	608.746	574.997	47.4308
574.138	553.125	531.959	633.318	535.451	571.021	491.818	604.891	621.352	633.849	575.092	48.0012
565.866	547.493	537.437	668.485	548.768	578.619	474.978	638.309	613.655	671.821	584.543	62.9479
558.693	539.666	542.47	614.014	550.858	592.156	489.351	584.324	623.491	701.511	579.653	58.247
603.618	605.483	589.64	582.528	584.355	635.794	493.546	573.363	663.699	607.596	593.962	44.4403
626.421	622.13	615.534	590.358	575.275	614.14	524.689	655.787	629.814	653.297	610.745	39.0047
654.444	640.861	643.819	660.5	568.922	677.207	542.925	650.96	683.322	597.347	632.031	46.7681
712.565	690.022	703.286	663.435	607.038	779.675	527.681	695.59	731.672	668.677	677.964	69.4718
710.947	660.418	677.348	677.105	589.281	730.987	543.25	656.371	700.849	641.578	658.813	56.6346
604.168	636.374	668.632	647.564	596.011	666.639	533.09	651.361	667.762	582.012	625.361	45.1762
620.612	641.849	652.5	698.842	613.804	653.81	538.313	651.672	633.447	533.319	623.817	51.8075
580.927	610.371	671.955	657.246	570.836	639.11	533.234	580.93	637	630.185	611.179	43.6626
604.358	615.599	626.309	624.804	591.72	633.745	540.399	581.071	640.068	550.489	600.856	34.5399
588.427	618.868	581.765	645.168	637.3	625.958	512.562	624.692	609.182	559.27	600.319	40.7227
619.765	645.779	589.605	677.101	627.8	643.134	510.617	657.116	617.401	561.769	615.009	49.369
668.558	656.696	557.328	661.79	599.241	627.815	517.428	640.68	609.186	572.69	611.141	49.8773
645.606	594.781	555.046	667.586	611.701	663.161	532.902	630.97	654.581	552.281	610.862	49.844
570.033	596.351	548.072	612.458	592.461	627.841	557.099	586.05	635.88	567.279	589.352	29.5418
583.335	565.202	549.722	634.571	593.018	655.363	508.418	614.061	571.204	575.191	585.009	42.3054
602.452	619.411	570.688	666.095	588.802	626.449	504.99	603.446	601.031	576.936	596.03	41.9651
686.379	605.317	573.164	637.728	638.029	648.623	531.954	601.011	601.599	602.199	612.6	42.8104
617.794	569.899	570.062	669.022	596.136	644.639	542.339	611.617	574.326	581.418	597.725	38.4463
748.926	599.02	591.38	653.821	588.938	659.469	558.58	557.291	600.787	585.972	614.418	58.1836
646.113	610.236	589.168	630.142	583.932	688.361	555.915	577.638	651.996	579.091	611.259	41.686
628.079	607.983	569.809	685.151	604.477	677.351	566.685	577.45	629.556	530.831	607.737	49.0977
614.624	602.271	545.807	711.879	616.839	668.297	553.868	604.876	639.736	571.815	613.001	51.051
575.283	573.296	617.718	632.774	634.363	631.728	544.946	630.694	659.17	545.401	604.537	41.027
579.54	576.914	597.986	631.831	623.149	686.146	580.823	607.738	629.182	589.363	610.267	33.7706
624.026	582.825	609.315	647.022	603.325	619.901	533.013	646.022	610.212	677.104	615.277	39.2967
587.671	559.769	590.225	633.5	579.248	600.535	511.354	628.251	613.018	618.53	592.21	36.4867
597.518	555.154	625.105	639.227	584.644	641.263	516.87	662.668	572.684	608.397	600.353	44.4448
598.174	612.249	563.707	663.312	546.06	643.486	494.781	617.567	607.13	597.84	594.431	48.7676
603.921	608.779	591.099	647.947	600.979	637.761	481.954	576.091	596.088	571.971	591.659	45.3494
580.238	592.374	582.331	653.017	645.379	625.042	516.782	612.335	580.026	611.061	599.858	39.2379
557.86	613.187	562.754	657.72	601.506	635.233	509.905	661.204	561.234	570.495	593.11	49.0734
550.709	669.895	559.8	648.732	623.815	600.712	526.594	623.36	633.069	566.86	600.355	47.1382
545.734	684.62	594.224	692.629	568.478	576.675	485.576	634.497	587.251	605.193	597.488	62.0625
604.886	682.785	562.345	676.673	543.619	591.245	508.459	652.943	572.353	601.582	599.689	57.1333
581.186	639.653	525.548	639.631	525.4	598.42	557.91	666.428	579.862	599.835	591.387	47.6745
551.959	578.866	587.694	641.067	543.267	582.967	549.962	643.022	584.576	604.661	586.804	34.9194
576.816	618.614	585.324	656.846	572.294	561.015	564.698	623.628	572.553	590.27	592.206	31.0256
558.142	550.753	598.211	664.007	589.168	577.577	561.92		600.722	582.489
540.272	546.72	583.84	673.104	565.355	552.114	519.315			545.323
557.001	554.955	534.846		598.469	595.843				552.216
	554.742	542.37		568.205	615.221				535.929
	545.771	599.713		598.473	625.848				606.56
	544.365			587.854					642.515
	531.151			594.085					641.778
	539.956			575.058
	594.423			545.905
				574.332
				606.771
				605.307
				606.615
				600.642
				619.329
				591.648
				622.098

## Sheet: control
200311_par6aid_noca1_C_4	200311_par6aid_noca1_C_5	200311_par6aid_noca1_C_8	200311_par6aid_noca1_C_7	200311_par6aid_noca1_C_2	200311_par6aid_noca1_C_1	200311_par6aid_noca1_C_6	200311_par6aid_noca1_C_3	200311_par6aid_noca1_C_9
					564.809
					549.523
					577.86
					526.582
					535.082
					554.171
					565.702
					547.41
					523.813
					494.847
					523.801
					532.1	510.588
				479.228	531.307	524.718
				479.811	557.68	534.49
				481.901	553.379	516.961
			608.205	496.461	543.504	498.872		494.829
			557.251	513.751	564.3	511.326		466.796
			569.734	518.048	534.135	532.51		450.226
494.037			560.129	525.265	514.178	520.103		458.425
510.069		567.953	590.794	493.56	553.367	515.068		480.283
536.029		517.356	601.078	532.732	552.479	526.105		486.954
525.573		587.625	544.561	503.543	587.951	529.032	499.915	504.894	Averages	Stdev
515.424	472.532	555.356	551.752	534.21	562.058	560.244	467.985	489.172	523.193	38.2213
502.029	493.897	533.519	514.557	530.596	556.146	496.667	419.586	468.843	501.76	40.1337
494.636	476.33	503.633	526.126	513.474	528.293	534.57	435.632	466.368	497.674	32.9537
480.625	469.989	491.267	543.065	520.161	561.804	532.203	466.039	472.602	504.195	35.7347
505.777	485.994	523.94	540.334	481.619	520.275	550.164	475.863	489.634	508.178	26.8864
480.713	511.931	520.295	558.46	471.357	508.785	541.357	462.48	477.041	503.602	33.1094
489.388	491.907	541.313	564.427	489.976	533.424	551.978	474.604	486.788	513.756	33.674
526.872	494.458	532.633	554.332	538.875	486.884	537.267	464.337	486.905	513.618	30.8546
512.51	450.7	512.47	548.474	518.953	516.391	516.159	474.663	490.606	504.547	28.5599
512.16	519.673	556.005	569.529	485.171	482.601	532.563	488.94	508.362	517.223	30.8451
546.839	514.854	529.43	565.503	503.133	481.156	505.685	471.055	502.888	513.394	30.0004
551.288	499.56	480.515	541.014	483.867	446.593	513.467	468.177	509.198	499.298	33.6884
524.67	486.951	484.721	546.249	459.741	495.606	482.611	472.72	476.506	492.197	27.0231
507.353	483.843	487.493	558.742	442.029	465.025	505.983	470.858	514.964	492.921	33.8453
498.071	464.749	467.669	552.634	445.68	469.232	474.519	445.527	496.735	479.424	33.1214
509.327	487.114	487.519	563.839	453.776	487.16	467.925	467.083	477.565	489.034	32.2475
482.645	481.34	512.202	505.073	476.862	475.983	457.474	454.695	520.768	485.227	23.0876
495.913	502.927	509.127	568.061	510.509	471.451	470.197	472.822	525.83	502.982	31.3855
522.564	500.576	574.296	550.441	533.653	601.249	485.952	450.658	532.725	528.013	45.5495
514.559	503.21	517.763	504.81	499.15	559.553	477.905	470.46	532.826	508.915	26.9983
497.843	507.14	531.491	551.624	476.443	537.714	464.771	463.907	524.433	506.152	32.5764
501.819	534.056	529.769	537.449	480.752	547.428	455.321	460.166	487.925	503.854	34.7612
480.362	532.726	517.634	515.538	480.647	492.511	485.179	467.35	487.922	495.541	21.4833
491.608	511.004	573.563	532.283	478.695	507.938	503.328	437.837	494.461	503.413	37.0191
503.953	479.632	552.117	537.865	476.399	547.501	544.447	445.083	495.72	509.191	38.1498
494.426	521.313	563.065	520.104	498.572	518.772	500.628	481.29	489.606	509.753	24.5549
472.058	536.26	559.538	485.909	515.047	555.383	485.377	463.192	532.574	511.704	36.2791
523.341	526.903	544.01	523.842	538.819	537.389	483.114	457.505	502.817	515.304	28.8739
495.588	558.984	578.453	531.956	574.769	562.831	497.731	434.09	494.09	525.388	48.4717
506.359	570.29	581.303	532.701	646.085	586.043	524.418	485.759	522.348	550.59	49.5853
577.009	625.803	639.305	547.691	664.509	667.095	536.405	516.064	564.539	593.158	57.0793
764.319	603.643	732.478	620.261	728.35	708.834	547.027	476.819	549.09	636.758	101.06
846.18	607.669	803.612	746.039	760.489	834.001	567.873	491.082	581.182	693.125	131.89
872.027	703.288	833.081	815.474	818.186	811.319	696.895	588.87	590.271	747.712	106.607
883.391	763.24	886.206	916.73	823.864	892.85	859.31	590.342	631.917	805.317	119.386
785.369	743.653	808.708	865.633	751.042	751.304	800.715	551.197	582.857	737.831	104.17
673.527	720.237	738.133	837.948	687.93	689.552	760.98	586.348	591.261	698.435	79.2831
637.698	659.485	674.414	727.415	671.07	646.767	693.856	513.38	575.79	644.431	64.3245
578.559	662.02	599.441	601.441	570.264	645.393	569.223	532.337	537.943	588.513	43.9352
551.288	605.102	590.624	536.905	556.242	627.938	533.766	499.523	521.447	558.093	41.8484
542.45	657.3	583.492	569.837	579.553	615.106	529.778	453.771	557.485	565.419	56.7703
531.506	682.468	567.469	596.851	592.522	536.987	516.019	490.618	562.429	564.097	56.3631
524.276	623.551	607.84	561.891	576.03	531.039	495.144	489.322	516.202	547.255	47.9073
520.003	695.854	581.318	558.635	621.924	567.685	485.531	478.419	527.372	559.638	68.6208
550.115	729.238	606.173	562.642	599.598	591.763	468.513	461.732	534.538	567.146	80.3665
546.252	663.73	626.571	568.241	607.698	553.544	505.173	473.434	492.236	559.653	64.0857
560.592	668.852	661.655	557.329	569.611	526.75	512.453	449.587	469.77	552.955	75.4441
527.19	685.054	659.583	558.85	595.716	561.598	541.169	432.558	498.968	562.298	77.6086
548.268	762.154	581.729	546.922	576.419	563.769	499.583	439.276	515.13	559.25	88.1502
594.424	695.399	587.105	544.845	551.766	525.025	495.619	499.213	492.802	554.022	65.0069
641.644	754.594	612.557	570.563	535.272	530.069	519.584	465.134	492.968	569.154	88.9423
557.691	709.884	602.888	629.837	546.868	505.367	499.82	476.504	535.605	562.718	73.7107
555.405	711.853	620.396	606.276	587.392	523.924	507.786	453.732	510.8	564.174	76.8151
539.436	694.68	643.64	583.894	567.469	533.799	510.643	499.739	485.311	562.068	69.3523
563.735	689.817	610.651	559.952	590.835	547.411	492.666	514.367	482.707	561.349	64.3382
549.599	605.39	647.349	587.76	565.337	545.192	492.733	506.081	465.642	551.676	57.5854
557.59	617.08	674.423	539.388	555.84	524.916	490.23	506.77	475.211	549.05	63.0881
551.082	662.58	710.284	511.154	558.12	530.2	490.917	496.776	490.417	555.726	78.9874
524.044	613.734	734.676	497.827	596.869	556.034	480.709	521.485	453.245	553.18	85.6453
556.291	627.664	656.55	516.852	557.218	538.302	471.973	500.482	470.727	544.007	64.4332
568.096	592.116	657.351	515.256	550.433	537.232	453.931	447.461	494.761	535.182	66.909
536.346	627.971	639.055	505.891	518.821	544.371	460.597	456.111	478.729	529.766	66.4726
540.635	607.741	633.113	531.729	510.921	564.872	457.961	475.074	472.58	532.736	61.0412
538.783	588.171	618.954	531.762	572.188	568.828	475.768	453.106	488.161	537.302	55.665
	595.799	587.009	521.748	591.529	551.931	439.732	458.991	501.774
		604.864	521.804	620.021	567.376	467.858	451.603	499.518
		634.16	520.672	633.042	502.995	497.136	442.459	487.005
		624.336	492.559	612.708	531.208	473.53	451.226	488.958
		567.818	508.779	630.292	539.079	477.374	444.048	489.427
		575.659	552.34	644.832	532.564	529.573	462.388	476.762
		592.415	524.405	646.556	546.375	517.245	461.777	514.356
		583.638	507.484	623.607	634.482	518.21	428.778	494.427
			531.55	620.801	625.809	482.608		492.233
			567.936	596.98	558.907	487.243		482.946
			564.522	589.3	571.742			481.891
			603.796	593.187	578.423			453.678
			573.79	547.586	619.083			469.514
			546.161	553.165	599.891			511.264
			540.813	545.543	574.043			497.528
			532.753		596.869			501.36
					633.834			538.152
					676.923			517.816
					636.379			529.593
					649.856			541.82
					657.966			487.365
					605.36

## Sheet: together
Averages		Stdev				Normalisation value		Distance (um)	Normalised averages
pwrt2_auxin	control	pwrt2_auxin	control
	523.193		38.2213		pwrt2	564.172
	501.76		40.1337		control	512.508
	497.674		32.9537
	504.195		35.7347
	508.178		26.8864
	503.602		33.1094
560.58	513.756	51.2951	33.674					0	-3.59236	1.24853
566.866	513.618	43.3826	30.8546					0.07407	2.69334	1.11053
563.977	504.547	34.2411	28.5599					0.14815	-0.19506	-7.96024
574.461	517.223	27.8583	30.8451					0.22222	10.2887	4.71509
554.978	513.394	40.9417	30.0004					0.2963	-9.19466	0.886089
566.077	499.298	60.6707	33.6884					0.37037	1.90424	-13.2099
562.174	492.197	47.4003	27.0231					0.44444	-1.99856	-20.3104
562.744	492.921	46.0921	33.8453					0.51852	-1.42876	-19.5865
554.211	479.424	48.5879	33.1214					0.59259	-9.96176	-33.0836
552.545	489.034	37.9996	32.2475					0.66667	-11.627	-23.4734
565.82	485.227	47.073	23.0876					0.74074	1.64784	-27.2807
568.568	502.982	51.6255	31.3855					0.81481	4.39594	-9.52569
571.033	528.013	61.9662	45.5495					0.88889	6.86044	15.5051
569.124	508.915	72.8839	26.9983					0.96296	4.95164	-3.59247
566.438	506.152	63.8421	32.5764					1.03704	2.26504	-6.3558
555.295	503.854	52.6795	34.7612					1.11111	-8.87786	-8.65369
566.789	495.541	59.9067	21.4833					1.18519	2.61624	-16.9666
573.988	503.413	60.5983	37.0191					1.25926	9.81554	-9.09458
558.953	509.191	51.3024	38.1498					1.33333	-5.21926	-3.3168
571.066	509.753	60.483	24.5549					1.40741	6.89344	-2.75469
576.424	511.704	57.9944	36.2791					1.48148	12.2517	-0.803356
574.997	515.304	47.4308	28.8739					1.55556	10.8244	2.79687
575.092	525.388	48.0012	48.4717					1.62963	10.9197	12.8804
584.543	550.59	62.9479	49.5853					1.7037	20.3706	38.082
579.653	593.158	58.247	57.0793					1.77778	15.4809	80.6502
593.962	636.758	44.4403	101.06					1.85185	29.7897	124.25
610.745	693.125	39.0047	131.89					1.92593	46.572	180.618
632.031	747.712	46.7681	106.607					2	67.8582	235.205
677.964	805.317	69.4718	119.386					2.07407	113.792	292.809
658.813	737.831	56.6346	104.17					2.14815	94.6409	225.323
625.361	698.435	45.1762	79.2831					2.22222	61.1888	185.928
623.817	644.431	51.8075	64.3245					2.2963	59.6443	131.923
611.179	588.513	43.6626	43.9352					2.37037	47.0069	76.0059
600.856	558.093	34.5399	41.8484					2.44444	36.6837	45.5852
600.319	565.419	40.7227	56.7703					2.51852	36.1467	52.9115
615.009	564.097	49.369	56.3631					2.59259	50.8362	51.589
611.141	547.255	49.8773	47.9073					2.66667	46.9687	34.7474
610.862	559.638	49.844	68.6208					2.74074	46.689	47.1303
589.352	567.146	29.5418	80.3665					2.81481	25.1799	54.6382
585.009	559.653	42.3054	64.0857					2.88889	20.836	47.1456
596.03	552.955	41.9651	75.4441					2.96296	31.8575	40.4479
612.6	562.298	42.8104	77.6086					3.03704	48.4278	49.7909
597.725	559.25	38.4463	88.1502					3.11111	33.5527	46.7424
614.418	554.022	58.1836	65.0069					3.18519	50.2459	41.5144
611.259	569.154	41.686	88.9423					3.25926	47.0867	56.6463
607.737	562.718	49.0977	73.7107					3.33333	43.5647	50.2106
613.001	564.174	51.051	76.8151					3.40741	48.8287	51.6662
604.537	562.068	41.027	69.3523					3.48148	40.3648	49.5603
610.267	561.349	33.7706	64.3382					3.55556	46.0947	48.8414
615.277	551.676	39.2967	57.5854					3.62963	51.104	39.1683
592.21	549.05	36.4867	63.0881					3.7037	28.0376	36.5422
600.353	555.726	44.4448	78.9874					3.77778	36.1805	43.218
594.431	553.18	48.7676	85.6453					3.85185	30.2581	40.6728
591.659	544.007	45.3494	64.4332					3.92593	27.4865	31.499
599.858	535.182	39.2379	66.909					4	35.686	22.6743
593.11	529.766	49.0734	66.4726					4.07407	28.9373	17.2582
600.355	532.736	47.1382	61.0412					4.14815	36.1821	20.2286
597.488	537.302	62.0625	55.665					4.22222	33.3152	24.7948
599.689		57.1333						4.2963
591.387		47.6745						4.37037
586.804		34.9194						4.44444
592.206		31.0256						4.51852
								4.59259
								4.66667
								4.74074
								4.81482
								4.88889
								4.96296
								5.03704
								5.11111
								5.18518
								5.25926
								5.33333
								5.40741
								5.48148
								5.55556
								5.62963
								5.7037
								5.77778
								5.85185
								5.92593
								6
								6.07407
								6.14815
								6.22222
								6.2963
								6.37037
								6.44444
								6.51852
								6.59259
								6.66667
								6.74074
								6.81482
								6.88889
								6.96296
								7.03704
								7.11111
								7.18518
								7.25926
								7.33333
								7.40741
								7.48148
								7.55556
								7.62963
								7.7037
								7.77778
								7.85185
								7.92593
								8
								8.07407
								8.14815
								8.22222
								8.2963
								8.37037
								8.44444
								8.51852
								8.59259
								8.66667
								8.74074
								8.81481
								8.88889
								8.96296
								9.03704
								9.11111
								9.18519
								9.25926
								9.33333
								9.40741
								9.48148
								9.55556
								9.62963
								9.7037
								9.77778
								9.85185
								9.92593
