# Supplementary material for: Epidermal PAR-6 and PKC-3 are essential for larval development of C. elegans and organize non-centrosomal microtubules
Source: eLife journal article supplement (doi:10.7554/elife.62067), 2020-12-10
Supplement: fig6-data1 [file 200526_nocako_gip1_wholecell.xlsx]

## Sheet: 200526_gip1_C_7
200526_gip1_C_7												Background corrected	200526_gip1_C_7
493.126	544.509	525.385	546.803	535.844	530.008	498.373	505.701	551.611	523.468	506.476	556.578		56.828	108.211
490.504	536.448	506.869	522.137	534.938	523.415	509.613	511.727	536.827	522.639	525.785	536.349		54.206	100.15	89.087	110.505			62.075	69.403
492.808	537.689	522.293	520.937	520.322	526.804	518.687	515.508	526.566	525.601	528.405	533.416		56.51	101.391	70.571	85.839	99.546		73.315	75.429	115.313	87.17
497.209	527.053	529.8	531.567	522.358	552.798	500.189	490.015	531.262	527.564	534.409	550.881		60.911	90.755	85.995	84.639	98.64		82.389	79.21	100.529	86.341	70.178	120.28	Average	Stdev
485.175	507.951	498.586	522.149	545.385	536.96	526.634	490.495	544.522	536.396	553.886	555.059		48.877	71.653	93.502	95.269	84.024	93.71	63.891	53.717	90.268	89.303	89.487	100.051	81.146	17.2587
485.182	530.811	481.252	526.151	516.788	533.943	511.827	500.321	497.604	531.979	554.91	563.673		48.884	94.513	62.288	85.851	86.06	87.117	90.336	54.197	94.964	91.266	92.107	97.118	82.0584	16.8587
496.096	529.771	522.189	525.8	513.487	544.357	533.148	505.803	497.653	533.002	600.913	588.122		59.798	93.473	44.954	89.853	109.087	90.506	75.529	64.023	108.224	100.098	98.111	114.583	87.3532	21.7889
482.721	511.672	493.718	524.842	512.347	512.29	530.038	517.767	506.887	525.564	589.104	555.175		46.423	75.374	85.891	89.502	80.49	116.5	96.85	69.505	61.306	95.681	117.588	118.761	87.8226	22.9162
490.998	506.777	497.581	509.926	555.235	486.925	507.719	526.652	496.963	547.444	604.135	562.675		54.7	70.479	57.42	88.544	77.189	100.662	93.74	81.469	61.355	96.704	118.612	127.375	85.6874	23.1853
484.221	503.382	501.619	514.228	540.749	507.975	503.336	533.286	504.055	533.413	553.851	533.97		47.923	67.084	61.283	73.628	76.049	97.645	71.421	90.354	70.589	89.266	164.615	151.824	88.4734	35.324
496.113	506.791	535.391	527.475	529.714	508.943	514.843	520.122	521.638	549.387	538.332	533.92		59.815	70.493	65.321	77.93	118.937	108.059	67.038	96.988	60.665	111.146	152.806	118.877	92.3396	29.8579
515.27	504.603	528.61	516.391	551.978	526.504	491.682	508.908	520.561	520.729	525.763	518.122		78.972	68.305	99.093	91.177	104.451	75.992	78.545	83.824	67.757	97.115	167.837	126.377	94.9537	28.4182
514.439	510.143	528.566	524.253	526.036	544.075	498.138	519.887	528.757	513.16	526.114	536.023		78.141	73.845	92.312	80.093	93.416	50.627	55.384	72.61	85.34	113.089	117.553	97.672	84.1735	20.3004
509.613	500.626	525.458	535.007	537.781	519.146	528.214	495.612	537.4	520.705	517.675	507.357		73.315	64.328	92.268	87.955	115.68	71.677	61.84	83.589	84.263	84.431	102.034	97.622	84.9168	15.7619
511.532	501.851	522.165	554.764	530.298	494.971	540.11	523.179	549.303	509.799	523.086	508.452		75.234	65.553	89.16	98.709	89.738	72.645	91.916	59.314	92.459	76.862	89.465	81.824	81.9066	12.055
512.11	519.186	552.828	532.084	524.848	498.044	547.691	494.346	556.591	514.598	529.339	536.364		75.812	82.888	85.867	118.466	101.483	90.206	103.812	86.881	101.102	84.407	89.816	99.725	93.3721	11.772
471.189	521.238	535.279	533.368	545.981	498.359	543.113	492.419	520.568	498.327	530.561	540.162		34.891	84.94	116.53	95.786	94	107.777	111.393	58.048	113.005	73.501	81.377	71.059	86.8589	24.7289
487.061	543.604	516.963	509.298	562.311	504.063	511.553	491.851	509.066	501.775	515.375	520.617		50.763	107.306	98.981	97.07	88.55	82.848	106.815	56.121	120.293	78.3	86.788	72.154	87.1658	20.7593
498.178	499.486	531.499	525.812	554.565	523.162	519.804	501.216	498.489	539.202	497.824	514.052		61.88	63.188	80.665	73	109.683	58.673	75.255	55.553	84.27	62.029	93.041	100.066	76.4419	17.5253
512.747	501.998	506.859	524.406	517.71	523.737	527.675	518.605	522.844	533.388	494.154	503.886		76.449	65.7	95.201	89.514	126.013	61.746	83.506	64.918	72.768	65.477	94.263	103.864	83.2849	19.3896
502.17	514.645	531.788	508.321	520.124	535.406	522.469	526.529	525.363	529.464	497.34	520.334		65.872	78.347	70.561	88.108	118.267	62.061	91.377	82.307	62.191	102.904	79.077	84.319	82.1159	16.7485
476.417	531.85	513.25	526.27	509.323	540.24	559.851	529.067	531.586	527.252	517.112	518.794		40.119	95.552	95.49	72.023	81.412	67.765	86.171	90.231	86.546	97.09	61.526	77.754	79.3066	16.8033
515.322	517.317	530.519	511.538	521.387	543.208	551.043	544.622	549.569	529.808	552.807	543.581		79.024	81.019	76.952	89.972	83.826	86.864	123.553	92.769	89.065	93.166	57.856	67.588	85.1378	15.9987
516.121	512.255	532.79	530.384	542.266	550.996	526.87	528.553	519.532	512.733	530.657	508.83		79.823	75.957	94.221	75.24	73.025	87.439	114.745	108.324	95.288	90.954	61.042	84.036	86.6745	15.2242
493.286	549.171	524.507	508.156	563.665	539.862	517.846	571.565	549.591	533.616	499.151	533.6		56.988	112.873	96.492	94.086	85.089	99.108	90.572	92.255	113.271	93.51	80.814	82.496	91.4628	14.9337
487.316	511.041	546.181	507.904	571.237	561.502	532.883	569.877	549.33	543.084	517.601	544.65		51.018	74.743	88.209	71.858	105.968	103.942	81.548	135.267	83.234	76.435	116.509	107.283	91.3345	23.0897
507.315	544.965	545.435	504.867	569.521	551.689	548.701	588.382	586.359	531.323	524.425	538.822		71.017	108.667	109.883	71.606	127.367	106.91	96.585	133.579	113.293	97.318	94.359	72.532	100.26	20.724
504.58	544.662	547.334	530.517	577.42	553.018	551.13	604.651	602.215	564.534	519.063	548.257		68.282	108.364	109.137	68.569	134.939	114.698	112.403	152.084	113.032	106.786	62.853	97.302	104.037	26.7279
536.336	559.141	563.636	535.392	584.802	576.687	563.287	593.418	572.116	618.549	534.388	587.465		100.038	122.843	111.036	94.219	133.223	103.564	114.832	168.353	150.061	95.025	81.303	108.352	115.237	24.9539
560.332	549.391	602.101	540.12	578.807	627.801	571.36	598.92	577.328	638.498	538.67	648.307		124.034	113.093	127.338	99.094	141.122	125.204	126.989	157.12	165.917	128.236	88.127	102.524	124.9	22.6921
578.865	532.269	642.73	565.191	652.345	700.541	549.413	615.205	602.628	640.186	556.124	695.117		142.567	95.971	165.803	103.822	148.504	115.391	135.062	162.622	135.818	182.251	82.765	111.959	131.878	30.4616
592.873	544.29	640.954	616.995	745.816	773.481	554.664	633.245	639.89	634.552	571.518	729.227		156.575	107.992	206.432	128.893	142.509	116.72	113.115	178.907	141.03	202.2	98.09	151.167	145.303	35.719
573.554	591.344	614.239	673.246	831.549	792.204	576.82	674.091	725.045	634.007	641.546	773.873		137.256	155.046	204.656	180.697	216.047	140.389	118.366	196.947	166.33	203.888	102.372	212.009	169.5	38.7272
547.613	626.916	657.528	707.044	856.132	725.28	632.35	690.185	727.641	631.411	633.708	764.722		111.315	190.618	177.941	236.948	309.518	191.503	140.522	237.793	203.592	198.254	119.826	258.819	198.054	57.7575
567.736	649.89	667.617	726.984	863.127	699.037	692.843	732.484	743.522	612.855	594.152	751.993		131.438	213.592	221.23	270.746	395.251	264.243	196.052	253.887	288.747	197.709	135.22	292.929	238.42	72.9326
572.444	636.279	686.791	689.582	794.742	693.943	696.185	704.798	703.495	620.993	606.329	700.833		136.146	199.981	231.319	290.686	419.834	337.183	256.545	296.186	291.343	195.113	205.248	337.575	266.43	78.1863
594.174	678.951	627.932	669.395	754.839	624.916	672.67	661.511	746.995	606.684	590.234	649.347		157.876	242.653	250.493	253.284	426.829	355.906	259.887	268.5	307.224	176.557	197.41	328.424	268.754	76.7763
560.733	696.249	571.67	643.453	739.65	612.534	676.738	644.889	671.142	571.68	571.347	662.46		124.435	259.951	191.634	233.097	358.444	288.982	236.372	225.213	267.197	184.695	157.854	315.695	236.964	66.719
573.722	628.333	560.204	632.706	687.221	556.376	661.448	606.51	614.429	556.433	557.169	591.181		137.424	192.035	135.372	207.155	318.541	262.739	240.44	208.591	310.697	170.386	170.031	264.535	218.162	61.8942
577.781	606.503	556.702	594.297	664.424	532.844	636.716	597	582.184	570.868	616.146	560.95		141.483	170.205	123.906	196.408	303.352	257.645	225.15	170.212	234.844	135.382	153.936	213.049	193.798	54.6557
554.645	561.661	554.913	593.351	640.12	543.494	610.322	607.515	548.214	564.746	592.515	544.55		118.347	125.363	120.404	157.999	250.923	188.618	200.418	160.702	178.131	120.135	135.049	226.162	165.188	44.5397
534.117	555.196	544.163	590.579	617.924	541.987	592.729	589.389	557.349	578.243	550.106	553.79		97.819	118.898	118.615	157.053	228.126	176.236	174.024	171.217	145.886	134.57	120.871	154.883	149.85	35.2541
534.31	524.096	569.964	585.921	576.978	537.49	591.562	576.846	550.094	546.293	577.151	570.208		98.012	87.798	107.865	154.281	203.822	120.078	156.431	153.091	111.916	128.448	179.848	124.652	135.52	34.5634
530.713	546.534	551.308	555.559	599.673	531.461	647.933	555.599	531.369	563.269	595.888	520.763		94.415	110.236	133.666	149.623	181.626	96.546	155.264	140.548	121.051	141.945	156.217	108.252	132.449	26.7997
547.208	559.435	543.685	516.973	597.41	538.522	635.081	585.994	514.73	539.523	614.663	533.868		110.91	123.137	115.01	119.261	140.68	107.196	211.635	119.301	113.796	109.995	113.808	117.492	125.185	28.5523
516.664	510.906	548.364	526.308	590.531	547.285	650.118	552.134	512.411	548.64	586.241	575.869		80.366	74.608	107.387	80.675	163.375	105.689	198.783	149.696	95.071	126.971	140.853	133.91	121.449	37.8812
509.424	528.048	551.733	537.843	589.619	541.718	654.098	553.589	522.547	535.705	603.714	580.858		73.126	91.75	112.066	90.01	161.112	101.192	213.82	115.836	78.432	103.225	159.59	84.465	115.385	42.001
517.246	553.145	549.33	533.669	522.617	531.041	671.928	540.014	501.484	553.202	568.448	561.776		80.948	116.847	115.435	101.545	154.233	95.163	217.8	117.291	76.113	112.342	178.365	97.57	121.971	41.6752
543.253	560.547	537.838	535.804	539.28	531.449	622.588	552.539	494.998	557.904	590.364	554.853		106.955	124.249	113.032	97.371	153.321	102.224	235.63	103.716	86.249	99.407	149.943	139.571	125.972	40.7045
525.956	544.174	516.269	514.175	528.408	554.014	596.829	503.456	540.917	547.776	582.545	574.709		89.658	107.876	101.54	99.506	86.319	110.987	186.29	116.241	65.186	116.904	167.416	144.56	116.04	34.5491
495.69	545.788	529.716	550.064	527.048	541.178	580.614	506.507	562.792	529.654	554.089	571.97		59.392	109.49	79.971	77.877	102.982	105.42	160.531	67.158	58.7	121.606	132.15	125.478	100.063	32.0025
515.68	563.451	528.318	553.236	503.562	551.077	575.836	529.844	529.832	542.209	564.507	563.916		79.382	127.153	93.418	113.766	92.11	94.743	144.316	70.209	104.619	111.478	154.066	118.555	108.651	24.9707
515.936	541.116	509.346	544.456	500.263	535.003	563.609	548.886	517.731	533.559	539.284	563.434		79.638	104.818	92.02	116.938	90.75	95.151	139.538	93.546	126.494	93.356	146.247	138.411	109.742	22.8109
517.273	546.797	523.984	577.675	508.641	523.804	560.32	536.343	521.611	520.9	537.714	552.365		80.975	110.499	73.048	108.158	67.264	117.716	127.311	112.588	93.534	105.911	117.791	135.672	104.206	21.3382
511.816	545.824	545.331	559.522	517.019	520.127	583.047	529.76	522.549	523.976	543.92	557.78		75.518	109.526	87.686	141.377	63.965	104.88	124.022	100.045	81.433	97.261	128.209	127.618	103.462	23.7796
516.377	547.282	568.809	555.408	511.649	530.11	559.481	518.936	516.026	524.744	517.522	551.259		80.079	110.984	109.033	123.224	72.343	114.779	146.749	93.462	85.313	84.602	102.986	127.136	104.224	22.0205
537.38	553.667	554.979	543.017	526.919	554.792	541.482	517.099	515.286	521.754	530.022	576.449		101.082	117.369	132.511	119.11	80.721	98.705	123.183	82.638	86.251	87.678	101.416	116.067	103.894	17.4676
520.882	548.042	544.954	551.979	542.376	523.99	524.127	551.989	507.83	506.323	561.568	546.312		84.584	111.744	118.681	106.719	75.351	87.506	105.184	80.801	79.728	88.446	107.622	121.482	97.3207	16.2557
567.609	539.155	563.201	547.244	548.479	556.741	525.574	551.578	514.371	528.12	541.023	565.177		131.311	102.857	108.656	115.681	90.621	83.829	87.829	115.691	78.988	85.456	81.224	114.961	99.7587	17.2729
559.081	542.474	578.564	523.218	538.472	561.63	530.949	592.221	517.908	528.513	535.524	593.991		122.783	106.176	126.903	110.946	106.078	93.812	89.276	115.28	71.532	70.025	93.724	140.151	103.891	21.3271
570.247	558.111	560.831	541.167	543.57	569.531	539.093	612.375	517.579	521.397	535.7	581.202		133.949	121.813	142.266	86.92	112.181	118.494	94.651	155.923	78.073	91.822	125.27	110.014	114.281	23.4933
560.581	544.839	550.236	524.109	524.162	585.987	537.622	602.858	506.713	565.115	560.301	559.46		124.283	108.541	124.533	104.869	102.174	87.692	102.795	176.077	81.61	92.215	104.725	128.879	111.533	25.0436
636.372	541.269	546.39	528.042	520.769	629.947	548.626	626.683	510.784	586.448	594.252	600.981		200.074	104.971	113.938	87.811	107.272	120.443	101.324	166.56	81.281	85.099	99.226	157.693	118.808	36.8559
686.489	531.487	580.829	531.14	516.805	612.339	535.038	643.817	535.166	601.825	603.526	618.163		250.191	95.189	110.092	91.744	87.864	125.332	112.328	190.385	70.415	128.817	99.402	144.904	125.555	50.2236
702.619	543.08	543.619	539.937	541.653	597.841	538.53	634.383	556.615	651.721	583.891	648.324		266.321	106.782	144.531	94.842	84.471	133.233	98.74	207.519	74.486	150.15	124.003	123.162	134.02	54.7856
706.941	541.878	535.136	536.627	563.281	594.059	541.763	737.392	560.134	659.347	614.621	591.414		270.643	105.58	107.321	103.639	80.507	149.689	102.232	198.085	98.868	165.527	157.954	164.683	142.061	54.1883
735.791	542.287	530.125	540.661	541.857	615.442	540.266	730.565	575.582	739.853	578.802	573.987		299.493	105.989	98.838	100.329	105.355	193.649	105.465	301.094	120.317	215.423	167.228	181.865	166.254	74.702
818.145	527.435	527.164	556.375	551.066	612.181	543.429	646.95	604.646	690.508	581.219	574.306		381.847	91.137	93.827	104.363	126.983	176.041	103.968	294.267	123.836	223.049	147.593	212.026	173.245	90.4462
899.106	524.194	526.392	565.612	533.126	613.474	569.632	642.621	562.153	706.768	626.236	579.012		462.808	87.896	90.866	120.077	105.559	161.543	107.131	210.652	139.284	303.555	178.323	155.116	176.901	108.528
															90.094	129.314	114.768	157.761	133.334	206.323	168.348	254.21	142.504	137.689
																	96.828	179.144			125.855	270.47	144.921	138.008
																		175.883					189.938	142.714
																		177.176

## Sheet: 200526_gip1_C_6
200526_gip1_C_6										Background corrected	200526_gip1_C_6
419.068	451.495	475.444	509.078	492.304	490.345	511.822	516.709	475.307	469.829		19.666								75.905		Average	Stdev
443.778	452.167	473.234	503.651	492.236	475.576	497.01	495.578	489.259	510.633		44.376	52.093	76.042	109.676	92.902	90.943	112.42	117.307	89.857	115.769	90.1385	25.8671
452.994	452.76	495.061	482.087	482.686	461.255	487.488	526.914	453.202	515.171		53.592	52.765	73.832	104.249	92.834	76.174	97.608	96.176	53.8	97.038	79.8068	20.528
454.016	455.116	487.042	499.718	507.37	473.221	478.182	492.024	480.986	496.44		54.614	53.358	95.659	82.685	83.284	61.853	88.086	127.512	81.584	98.887	82.7522	22.492
478.213	465.348	493.837	497.204	530.322	499.289	496.18	492.428	480.119	498.289		78.811	55.714	87.64	100.316	107.968	73.819	78.78	92.622	80.717	100.451	85.6838	15.4173
460.418	449.219	482.45	470.005	501.9	461.288	462.333	481.186	477.752	499.853		61.016	65.946	94.435	97.802	130.92	99.887	96.778	93.026	78.35	103.439	92.1599	19.9894
467.867	470.666	454.59	479.934	513.439	482.671	497.832	502.134	479.015	502.841		68.465	49.817	83.048	70.603	102.498	61.886	62.931	81.784	79.613	81.004	74.1649	14.6483
453.1	471.426	448.222	487.666	520.07	478.569	493.484	490.415	459.014	480.406		53.698	71.264	55.188	80.532	114.037	83.269	98.43	102.732	59.612	87.705	80.6467	20.7646
433.499	462.507	489.205	492.183	514.786	474.607	470.767	483.757	474.427	487.107		34.097	72.024	48.82	88.264	120.668	79.167	94.082	91.013	75.025	105.834	80.8994	25.5374
429.103	462.536	459.384	487.7	485.126	446.338	483.56	495.122	487.312	505.236		29.701	63.105	89.803	92.781	115.384	75.205	71.365	84.355	87.91	64.537	77.4146	22.7993
434.002	494.72	463.983	462.411	484.836	464.809	462.369	475.146	464.765	463.939		34.6	63.134	59.982	88.298	85.724	46.936	84.158	95.72	65.363	66.527	69.0442	19.4396
449.714	509.956	468.337	483.702	505.008	480.798	479.238	459.073	464.223	465.929		50.312	95.318	64.581	63.009	85.434	65.407	62.967	75.744	64.821	77.956	70.5549	13.0625
446.704	484.839	469.741	494.48	474.585	481.078	510.074	487.306	464.759	477.358		47.302	110.554	68.935	84.3	105.606	81.396	79.836	59.671	65.357	67.155	77.0112	19.7333
462.99	485.926	470.15	465.293	479.15	474.27	505.404	485.975	478.535	466.557		63.588	85.437	70.339	95.078	75.183	81.676	110.672	87.904	79.133	68.527	81.7537	13.9462
454.336	473.462	480.413	468.874	488.802	490.672	505.259	488.756	490.179	467.929		54.934	86.524	70.748	65.891	79.748	74.868	106.002	86.573	90.777	51.721	76.7786	16.711
455.908	481.635	461.073	479.132	487.85	484.354	466.86	467.009	487.468	451.123		56.506	74.06	81.011	69.472	89.4	91.27	105.857	89.354	88.066	54.058	79.9054	16.3589
457.588	465.465	444.363	467.615	507.555	529.323	475.064	433.915	482.828	453.46		58.186	82.233	61.671	79.73	88.448	84.952	67.458	67.607	83.426	51.146	72.4857	12.9241
456.421	492.387	449.024	481.139	536.341	522.386	462.272	469.46	481.091	450.548		57.019	66.063	44.961	68.213	108.153	129.921	75.662	34.513	81.689	64.794	73.0988	28.3224
449.755	511.329	443.498	466.393	527.78	514.371	485.997	483.146	490.308	464.196		50.353	92.985	49.622	81.737	136.939	122.984	62.87	70.058	90.906	74.338	83.2792	28.8652
450.424	497.257	446.667	466.016	524.172	505.402	507.358	474.549	512.577	473.74		51.022	111.927	44.096	66.991	128.378	114.969	86.595	83.744	113.175	101.786	90.2683	28.7885
443.517	508.888	455.243	466.203	538.722	531.195	500.422	474.575	489.714	501.188		44.115	97.855	47.265	66.614	124.77	106	107.956	75.147	90.312	78.006	83.804	26.475
469.562	499.101	432.364	514.712	504.071	532.934	478.04	470.557	470.389	477.408		70.16	109.486	55.841	66.801	139.32	131.793	101.02	75.173	70.987	64.544	88.5125	29.7884
459.575	502.257	452.952	503.948	507.837	515.02	466.692	515.417	466.702	463.946		60.173	99.699	32.962	115.31	104.669	133.532	78.638	71.155	67.3	94.293	85.7731	29.4904
477.825	510.962	457.014	458.227	532.148	504.423	516.013	467.631	494.929	493.695		78.423	102.855	53.55	104.546	108.435	115.618	67.29	116.015	95.527	117.228	95.9487	22.2265
464.257	496.843	501.598	496.67	504.37	557.408	527.103	458.923	499.851	516.63		64.855	111.56	57.612	58.825	132.746	105.021	116.611	68.229	100.449	116.635	93.2543	28.0191
454.146	489.313	494.791	487.178	510.551	526.947	505.101	464.645	501.976	516.037		54.744	97.441	102.196	97.268	104.968	158.006	127.701	59.521	102.574	101.616	100.604	29.5669
477.776	479.637	532.281	518.18	538.395	539.009	506.557	544.841	511.575	501.018		78.374	89.911	95.389	87.776	111.149	127.545	105.699	65.243	112.173	156.471	102.973	26.0608
459.119	499.045	617.549	610.587	603.393	585.125	592.492	640.095	564.083	555.873		59.717	80.235	132.879	118.778	138.993	139.607	107.155	145.439	164.681	162.762	125.025	34.1768
479.402	492.101	625.177	619.974	653.973	588.073	634.071	709.333	636.504	562.164		80	99.643	218.147	211.185	203.991	185.723	193.09	240.693	237.102	198.237	186.781	54.2439
512.537	517.185	667.325	649.05	691.265	601.15	732.423	747.872	690.85	597.639		113.135	92.699	225.775	220.572	254.571	188.671	234.669	309.931	291.448	247.723	217.919	69.8958
671.99	577.157	692.748	640.655	731.3	603.633	739.291	776.821	699.225	647.125		272.588	117.783	267.923	249.648	291.863	201.748	333.021	348.47	299.823	264.124	264.699	66.2518
711.565	556.85	729.305	640.136	722.149	615.887	714.379	669.222	722.084	663.526		312.163	177.755	293.346	241.253	331.898	204.231	339.889	377.419	322.682	278.5	287.914	63.1376
792.86	533.002	737.998	609.58	733.81	582.133	695.999	623.925	669.395	677.902		393.458	157.448	329.903	240.734	322.747	216.485	314.977	269.82	269.993	250.603	276.617	66.6351
762.373	541.454	655.61	571.478	718.887	612.106	660.768	657.065	693.046	650.005		362.971	133.6	338.596	210.178	334.408	182.731	296.597	224.523	293.644	174.62	255.187	79.9545
685.767	521.493	619.874	531.071	689.571	594.846	642.116	596.735	656.458	574.022		286.365	142.052	256.208	172.076	319.485	212.704	261.366	257.663	257.056	120.407	228.538	64.7482
672.768	516.588	553.934	516.744	678.677	603.276	597.684	565.257	586.213	519.809		273.366	122.091	220.472	131.669	290.169	195.444	242.714	197.333	186.811	91.362	195.143	65.2037
613.008	501.609	542.857	497.634	658.367	551.192	531.941	570.489	552.048	490.764		213.606	117.186	154.532	117.342	279.275	203.874	198.282	165.855	152.646	84.447	168.704	56.9719
557.137	473.861	532.726	512.518	585.83	529.918	566.948	583.14	535.743	483.849		157.735	102.207	143.455	98.232	258.965	151.79	132.539	171.087	136.341	58.187	141.054	53.2382
529.828	493.552	522.199	509.9	588.638	543.619	531.862	588.247	535.716	457.589		130.426	74.459	133.324	113.116	186.428	130.516	167.546	183.738	136.314	108.099	136.397	34.9179
511.406	468.822	545.074	507.086	605.504	520.915	527.591	575.327	526.594	507.501		112.004	94.15	122.797	110.498	189.236	144.217	132.46	188.845	127.192	50.002	127.14	41.5624
500.312	467.866	526.374	464.398	555.343	524.972	504.596	534.43	515.603	449.404		100.91	69.42	145.672	107.684	206.102	121.513	128.189	175.925	116.201	58.388	123	44.8014
476.212	489.647	510.142	478.268	498.568	508.322	505.377	540.917	517.901	457.79		76.81	68.464	126.972	64.996	155.941	125.57	105.194	135.028	118.499	52.857	103.033	34.9522
474.576	498.822	494.958	477.192	517.518	488.585	495.985	525.873	493.572	452.259		75.174	90.245	110.74	78.866	99.166	108.92	105.975	141.515	94.17	65.022	96.9793	21.8051
470.99	485.854	508.685	461.652	499.079	490.696	505.011	511.808	499.879	464.424		71.588	99.42	95.556	77.79	118.116	89.183	96.583	126.471	100.477	59.474	93.4658	20.2589
457.711	503.81	479.714	478.136	505.058	478.793	466.737	497.338	492.178	458.876		58.309	86.452	109.283	62.25	99.677	91.294	105.609	112.406	92.776	68.716	88.6772	19.5591
468.456	506.795	461.942	460.749	506.932	469.662	473.386	486.531	513.431	468.118		69.054	104.408	80.312	78.734	105.656	79.391	67.335	97.936	114.029	53.509	85.0364	19.6188
449.575	520.38	483.407	464.493	527.346	464.845	509.845	487.73	463.69	452.911		50.173	107.393	62.54	61.347	107.53	70.26	73.984	87.129	64.288	75.742	76.0386	19.2662
465.081	526.685	461.165	466.889	498.027	488.142	515.224	462.423	498.718	475.144		65.679	120.978	84.005	65.091	127.944	65.443	110.443	88.328	99.316	78.311	90.5538	23.3129
495.417	514.078	481.416	464.088	486.008	475.464	498.565	481.326	493.281	477.713		96.015	127.283	61.763	67.487	98.625	88.74	115.822	63.021	93.879	92.088	90.4723	21.6491
477.584	521.771	499.184	504.042	467.098	473.364	525.577	472.437	498.319	491.49		78.182	114.676	82.014	64.686	86.606	76.062	99.163	81.924	98.917	78.149	86.0379	14.4187
483.029	511.006	464.124	512.381	489.211	471.405	542.383	480.376	500.146	477.551		83.627	122.369	99.782	104.64	67.696	73.962	126.175	73.035	100.744	86.517	93.8547	20.3538
491.145	511.665	450.674	511.851	476.761	490.705	550.698	494.311	509.336	485.919		91.743	111.604	64.722	112.979	89.809	72.003	142.981	80.974	109.934	93.289	97.0038	23.014
514.083	481.38	456.558	499.826	472.632	469.512	580.791	498.51	495.233	492.691		114.681	112.263	51.272	112.449	77.359	91.303	151.296	94.909	95.831	119.849	102.121	26.8889
487.064	527.292	449.34	526.493	454.749	456.979	588.387	518.525	506.344	519.251		87.662	81.978	57.156	100.424	73.23	70.11	181.389	99.108	106.942	132.043	99.0042	35.921
476.31	513.097	458.614	499.953	478.361	472.127	587.35	525.936	508.644	531.445		76.908	127.89	49.938	127.091	55.347	57.577	188.985	119.123	109.242	100.526	101.263	43.0743
473.844	496.384	458.434	470.238	483.926	478.492	587.036	536.231	532.716	499.928		74.442	113.695	59.212	100.551	78.959	72.725	187.948	126.534	133.314	92.123	103.95	38.2188
468.581	487.305	451.642	472.619	510.578	481.564	569.552	521.891	482.001	491.525		69.179	96.982	59.032	70.836	84.524	79.09	187.634	136.829	82.599	100.031	96.6736	38.5759
456.995	491.805	443.698	486.789	522.749	490.558	571.312	517.778	511.299	499.433		57.593	87.903	52.24	73.217	111.176	82.162	170.15	122.489	111.897	107.609	97.6436	34.8916
457.906	494.537	458.364	472.844	521.514	489.995	557.425	546.826	534.88	507.011		58.504	92.403	44.296	87.387	123.347	91.156	171.91	118.376	135.478	139.559	106.242	38.884
485.385	494.445	501.757	506.706	521.32	483.471	558.361	519.205	538.066	538.961		85.983	95.135	58.962	73.442	122.112	90.593	158.023	147.424	138.664	94.491	106.483	33.1791
469.646	487.127	487.893	557.763	506.037	489.714	555.757	522.119	531.358	493.893		70.244	95.043	102.355	107.304	121.918	84.069	158.959	119.803	131.956	67.922	105.957	28.415
									467.324			87.725	88.491	158.361	106.635	90.312	156.355	122.717		56.694
									456.096											125.177
									524.579											75.839
									475.241											77.019
									476.421

## Sheet: 200526_gip1_C_5
200526_gip1_C_5										Background corrected	200526_gip1_C_5
529.373	528.063	606.261	597.46	571.247	519.248	528.926	549.048	503.921	548.006									112.583
520.432	550.216	561.081	568.194	550.028	547.575	527.737	526.216	493.99	542.268				169.796			82.783	92.461	89.751
518.534	531.992	545.324	578.559	568.55	532.894	533.842	520.6	534.044	520.192		92.908		124.616		134.782	111.11	91.272	84.135		111.541
518.604	525.96	528.917	587.21	575.436	553.459	561.945	527.306	534.489	522.624		83.967		108.859		113.563	96.429	97.377	90.841		105.803	Average	Stdev
519.094	517.549	530.133	564.018	627.525	529.625	561.291	508.826	529.254	536.572		82.069	91.598	92.452	160.995	132.085	116.994	125.48	72.361	67.456	83.727	102.522	30.1131
540.421	530.965	530.668	576.539	602.124	532.881	548.446	513.124	491.133	563.015		82.139	113.751	93.668	131.729	138.971	93.16	124.826	76.659	57.525	86.159	99.8587	26.4094
545	533.592	577.625	583.291	564.67	546.206	554.809	483.539	509.953	521.395		82.629	95.527	94.203	142.094	191.06	96.416	111.981	47.074	97.579	100.107	105.867	38.0619
558.377	539.833	544.931	581.186	545.645	553.595	562.215	497.299	511.452	529.546		103.956	89.495	141.16	150.745	165.659	109.741	118.344	60.834	98.024	126.55	116.451	31.0451
606.569	542.182	545.565	585.684	577.055	551.201	547.675	505.963	519.764	552.727		108.535	81.084	108.466	127.553	128.205	117.13	125.75	69.498	92.789	84.93	104.394	21.1606
597.787	528.339	538.059	572.465	581.081	530.953	530.828	495.356	527.226	545.671		121.912	94.5	109.1	140.074	109.18	114.736	111.21	58.891	54.668	93.081	100.735	26.695
559.176	518.037	555.728	568.398	574.842	528.142	544.989	516.614	530.745	546.148		170.104	97.127	101.594	146.826	140.59	94.488	94.363	80.149	73.488	116.262	111.499	31.388
558.829	522.475	539.476	560.786	580.342	568.625	525.005	506.165	522.853	559.751		161.322	103.368	119.263	144.721	144.616	91.677	108.524	69.7	74.987	109.206	112.738	30.3335
562.994	515.043	555.701	561.619	568.662	584.55	551.453	504.513	548.016	551.81		122.711	105.717	103.011	149.219	138.377	132.16	88.54	68.048	83.299	109.683	110.077	25.8128
541.397	510.296	550.322	553.961	545.299	588.27	586.661	485.993	520.854	528.544		122.364	91.874	119.236	136	143.877	148.085	114.988	49.528	90.761	123.286	114	29.6447
535.419	524.333	533.448	573.233	566.738	589.833	560.901	518.594	549.065	516.074		126.529	81.572	113.857	131.933	132.197	151.805	150.196	82.129	94.28	115.345	117.984	25.4915
511.658	531.942	520.45	568.266	581.256	593.325	568.468	544.629	582.055	524.19		104.932	86.01	96.983	124.321	108.834	153.368	124.436	108.164	86.388	92.079	108.551	20.8895
543.406	541.363	529.696	551.089	578.169	574.957	581.558	519.269	621.514	550.139		98.954	78.578	83.985	125.154	130.273	156.86	132.003	82.804	111.551	79.609	107.977	27.3485
522.325	550.782	543.209	532.27	550.07	555.533	584.388	508.163	599.857	546.513		75.193	73.831	93.231	117.496	144.791	138.492	145.093	71.698	84.389	87.725	103.194	30.3072
515.566	540.51	539.768	550.13	527.733	505.12	557.918	505.869	561.108	545.726		106.941	87.868	106.744	136.768	141.704	119.068	147.923	69.404	112.6	113.674	114.269	24.1243
495.46	569.667	548.419	558.072	519.931	514.257	561.464	524.4	579.113	524.283		85.86	95.477	103.303	131.801	113.605	68.655	121.453	87.935	145.59	110.048	106.373	23.0683
526.101	572.228	528.454	580.536	550.894	507.256	563.365	516.537	580.84	543.259		79.101	104.898	111.954	114.624	91.268	77.792	124.999	80.072	185.049	109.261	107.902	31.8045
527.376	582.776	543.221	616.556	547.774	511.893	552.048	496.88	612.989	538.62		58.995	114.317	91.989	95.805	83.466	70.791	126.9	60.415	163.392	87.818	95.3888	32.2139
530.893	586.328	530.306	623.074	545.714	520.807	543.758	503.831	546.474	556.761		89.636	104.045	106.756	113.665	114.429	75.428	115.583	67.366	124.643	106.794	101.835	18.5464
530.093	593.505	543.793	632.679	554.306	511.876	529.577	504.086	555.44	540.86		90.911	133.202	93.841	121.607	111.309	84.342	107.293	67.621	142.648	102.155	105.493	22.8186
525.466	622.449	547.552	694.797	538.633	501.039	532.608	477.316	613.404	573.99		94.428	135.763	107.328	144.071	109.249	75.411	93.112	40.851	144.375	120.296	106.488	32.4932
526.485	696.843	565.648	784.455	611.448	538.169	517.517	499.551	619.244	563.59		93.628	146.311	111.087	180.091	117.841	64.574	96.143	63.086	176.524	104.395	115.368	41.0787
567.804	700.869	570.018	780.539	666.148	534.079	537.08	533.367	676.025	607.48		89.001	149.863	129.183	186.609	102.168	101.704	81.052	96.902	110.009	137.525	118.402	32.4181
722.427	699.992	600.038	765.009	713.136	578.346	591.791	553.985	742.219	643.782		90.02	157.04	133.553	196.214	174.983	97.614	100.615	117.52	118.975	127.125	131.366	34.8476
874.738	708.01	638.834	766.085	711.167	692.846	712.667	606.105	707.033	652.046		131.339	185.984	163.573	258.332	229.683	141.881	155.326	169.64	176.939	171.015	178.371	38.7451
929.03	661.467	645.017	709.955	731.603	742.489	801.884	652.48	686.979	672.907		285.962	260.378	202.369	347.99	276.671	256.381	276.202	216.015	182.779	207.317	251.206	49.6558
886.349	628.87	665.443	620.129	667.697	761.59	842.168	751.712	661.513	667.112		438.273	264.404	208.552	344.074	274.702	306.024	365.419	315.247	239.56	215.581	297.184	71.9416
799.311	613.442	656.624	602.998	590.842	734.338	831.971	828.865	640.148	647.998		492.565	263.527	228.978	328.544	295.138	325.125	405.703	392.4	305.754	236.442	327.418	82.4565
704.571	605.042	644.882	586.317	568.534	658.475	749.251	798.489	597.113	580.539		449.884	271.545	220.159	329.62	231.232	297.873	395.506	362.024	270.568	230.647	305.906	77.1406
663.818	589.721	584.688	576.8	565.208	647.834	704.769	743.443	581.963	548.787		362.846	225.002	208.417	273.49	154.377	222.01	312.786	306.978	250.514	211.533	252.795	61.606
627.712	556.142	553.026	564.634	561.314	601.96	645.767	666.801	576.556	544.236		268.106	192.405	148.223	183.664	132.069	211.369	268.304	230.336	225.048	144.074	200.36	49.1339
591.574	581.1	538.396	530.185	538.743	593.655	574.32	585.279	544.678	537.232		227.353	176.977	116.561	166.533	128.743	165.495	209.302	148.814	203.683	112.322	165.578	39.7038
579.527	539.151	543.147	541.058	557.83	566.86	582.02	575.592	603.04	544.348		191.247	168.577	101.931	149.852	124.849	157.19	137.855	139.127	160.648	107.771	143.905	27.5524
569.529	516.122	535.705	544.762	545.399	563.651	578.819	552.414	614.765	527.952		155.109	153.256	106.682	140.335	102.278	130.395	145.555	115.949	145.498	100.767	129.582	21.4033
548.788	503.058	524.322	535.811	572.39	547.212	590.132	544.176	569.295	541.631		143.062	119.677	99.24	128.169	121.365	127.186	142.354	107.711	140.091	107.883	123.674	15.4539
591.029	514.994	526.857	540.674	590.66	554.081	582.393	562.005	542.601	552.395		133.064	144.635	87.857	93.72	108.934	110.747	153.667	125.54	108.213	91.487	115.786	22.7254
588.363	514.317	560.639	536.547	565.039	514.31	605.583	652.403	537.554	540.551		112.323	102.686	90.392	104.593	135.925	117.616	145.928	215.938	166.575	105.166	129.714	38.0847
570.432	532.126	540.088	551.836	592.395	543.078	616.801	660.697	591.302	528.438		154.564	79.657	124.174	108.297	154.195	77.845	169.118	224.232	178.3	115.93	138.631	46.1207
554.007	545.369	534.004	558.026	625.279	565.23	592.982	655.166	612.81	549.631		151.898	66.593	103.623	99.346	128.574	106.613	180.336	218.701	132.83	104.086	129.26	44.4222
560.265	548.027	535.037	546.012	607.736	565.186	563.723	628.239	605.682	589.722		133.967	78.529	97.539	104.209	155.93	128.765	156.517	191.774	106.136	91.973	124.534	35.424
575.28	534.759	582.596	570.335	667.571	611.589	551.551	610.215	585.086	623.805		117.542	77.852	98.572	100.082	188.814	128.721	127.258	173.75	101.089	113.166	122.685	34.5186
542.137	537.485	639.655	586.634	659.63	574.935	560.504	561.57	614.083	633.312		123.8	95.661	146.131	115.371	171.271	175.124	115.086	125.105	154.837	153.257	137.564	26.3803
544.73	541.36	633.146	557.083	630.284	592.442	606.813	587.955	612.238	670.618		138.815	108.904	203.19	121.561	231.106	138.47	124.039	151.49	176.345	187.34	158.126	39.8152
567.938	532.425	678.487	603.104	571.675	674.086	587.948	579.478	600.803	668.377		105.672	111.562	196.681	109.547	223.165	155.977	170.348	143.013	169.217	196.847	158.203	40.8259
581.831	528.738	703.138	593.7	579.667	644.961	595.065	584.662	574.743	605.563		108.265	98.294	242.022	133.87	193.819	237.621	151.483	148.197	148.621	234.153	169.635	53.7226
596.635	526.811	654.219	596.056	580.912	600.566	648.762	561.927	549.974	577.726		131.473	101.02	266.673	150.169	135.21	208.496	158.6	125.462	177.618	231.912	168.663	52.3457
595.608	525.564	616.143	605.167	564.603	582.749	626.009	603.417	533.665	563.265		145.366	104.895	217.754	120.618	143.202	164.101	212.297	166.952	175.773	169.098	162.006	35.7628
586.37	526.46	586.764	603.926	561.808	566.962	629.013	567.638	597.125	534.672		160.17	95.96	179.678	166.639	144.447	146.284	189.544	131.173	164.338	141.261	151.949	26.642
556.451	518.949	545.566	616.716	560.477	572.5	640.787	536.35	633.862	530.285		159.143	92.273	150.299	157.235	128.138	130.497	192.548	99.885	138.278	126.8	137.51	29.3715
556.948	518.544	539.759	596.081	553.975	583.034	619.701	526.68	658.444	556.179		149.905	90.346	109.101	159.591	125.343	136.035	204.322	90.215	113.509	98.207	127.657	36.0149
521.903	514.256	550.75	566.213	529.615	549.831	609.729	563.543	615.658	568.315		119.986	89.099	103.294	168.702	124.012	146.569	183.236	127.078	97.2	93.82	125.3	32.1474
529.63	537.575	565.19	553.815	537.947	534.612	608.567	535.584	636.762	547.658		120.483	89.995	114.285	167.461	117.51	113.366	173.264	99.119	160.66	119.714	127.586	29.0343
528.293	522.151	555.213	580.065	560.289	517.772	591.237	537.876	646.401	526.655		85.438	82.484	128.725	180.251	93.15	98.147	172.102	101.411	197.397	131.85	127.096	42.4188
542.793	520.772	528.612	595.704	528.844	550.294	566.604	531.957	577.837	558.589		93.165	82.079	118.748	159.616	101.482	81.307	154.772	95.492	221.979	111.193	121.983	44.4933
544.885	506.706	551.159	590.025	596.375	582.501	586.817	538.145	582.136	549.817		91.828	77.791	92.147	129.748	123.824	113.829	130.139	101.68	179.193	90.19	113.037	29.5236
											106.328	101.11	114.694	117.35	92.379	146.036	150.352		200.297	122.124
											108.42	85.686		143.6	159.91				209.936	113.352
												84.307		159.239					141.372
												70.241		153.56					145.671

## Sheet: 200526_gip1_C_4
200526_gip1_C_4										Background corrected	200526_gip1_C_4
476.066	493.25	527.4	529.05	488.25	472.2	566.75	497.8	512.05	501.4				98.631					69.031	83.281	72.631
503.057	507.192	533.9	519.7	503.6	490.3	537.6	530.85	555.8	502.6			64.481	105.131	100.281	59.481	43.431	137.981	102.081	127.031	73.831
492.044	519.741	532.15	536.35	524.45	492.25	491.1	537	541.45	510.1			78.423	103.381	90.931	74.831	61.531	108.831	108.231	112.681	81.331	Average	Stdev
500.971	523.469	490.05	567.9	518.7	488.1	516.9	522.7	562.3	534.35		47.297	90.972	61.281	107.581	95.681	63.481	62.331	93.931	133.531	105.581	86.1667	26.8032
490.617	511.135	517.2	587.75	490.7	481.65	456.8	580.45	586.8	494.35		74.288	94.7	88.431	139.131	89.931	59.331	88.131	151.681	158.031	65.581	100.924	35.6918
500.36	484.976	510.1	601.9	485.35	472.15	471.5	555.7	603.55	484.05		63.275	82.366	81.331	158.981	61.931	52.881	28.031	126.931	174.781	55.281	88.5789	48.7041
480.986	501.325	486.7	580.05	454.05	514.8	515.4	568.5	620.5	506.9		72.202	56.207	57.931	173.131	56.581	43.381	42.731	139.731	191.731	78.131	91.1757	55.6496
496.381	505.178	531.05	601.65	477.7	493.4	461.1	597.65	596.05	516		61.848	72.556	102.281	151.281	25.281	86.031	86.631	168.881	167.281	87.231	100.93	47.4063
490.026	511.868	497.2	525.6	473.45	470.45	492.25	581	564.5	504.8		71.591	76.409	68.431	172.881	48.931	64.631	32.331	152.231	135.731	76.031	89.9198	46.7537
510.474	516.239	489.5	602.1	439.45	479.3	481.8	563.65	570.6	489		52.217	83.099	60.731	96.831	44.681	41.681	63.481	134.881	141.831	60.231	77.9664	35.9153
507.193	525.176	505.1	550.85	514.9	495.25	495	599.75	603.85	513.65		67.612	87.47	76.331	173.331	10.681	50.531	53.031	170.981	175.081	84.881	94.993	58.1455
528.62	524.161	474.65	522	476.5	485.3	501.6	571	578	528.2		61.257	96.407	45.881	122.081	86.131	66.481	66.231	142.231	149.231	99.431	93.5362	35.2393
517.327	511.678	522.3	518.55	466.4	533.05	479.5	586.65	586.7	520.35		81.705	95.392	93.531	93.231	47.731	56.531	72.831	157.881	157.931	91.581	94.8345	36.9889
538.859	530.898	459.75	482.4	486.55	545.05	475.25	525.35	641.95	500.7		78.424	82.909	30.981	89.781	37.631	104.281	50.731	96.581	213.181	71.931	85.6431	51.1095
552.765	544.858	500.85	485.85	479.1	536.6	473.5	573.65	604.75	519.2		99.851	102.129	72.081	53.631	57.781	116.281	46.481	144.881	175.981	90.431	95.9528	41.5814
542.542	523.202	487.35	524.1	482.75	549.5	444.7	513.85	625.25	518.95		88.558	116.089	58.581	57.081	50.331	107.831	44.731	85.081	196.481	90.181	89.4945	44.7887
549.057	531.99	512.2	527.3	479.95	553.2	485.7	574.5	618	510.95		110.09	94.433	83.431	95.331	53.981	120.731	15.931	145.731	189.231	82.181	99.1071	47.618
590.526	536.966	477.95	476.45	509.3	581.3	488.7	507.8	595.8	529.75		123.996	103.221	49.181	98.531	51.181	124.431	56.931	79.031	167.031	100.981	95.4515	37.6135
604.701	530.862	495.55	479.75	497.5	556.6	482.5	564.1	563.25	507		113.773	108.197	66.781	47.681	80.531	152.531	59.931	135.331	134.481	78.231	97.7468	36.0587
586.767	563.947	494.3	514.3	506.3	562.4	467.45	522.65	566.2	494.35		120.288	102.093	65.531	50.981	68.731	127.831	53.731	93.881	137.431	65.581	88.6079	32.0165
619.585	551.489	525.25	504.6	508.55	549.6	488.85	534	544	551.2		161.757	135.178	96.481	85.531	77.531	133.631	38.681	105.231	115.231	122.431	107.168	34.8293
604.266	572.564	512.75	489.7	519.35	569.9	467.55	509.3	548	514.6		175.932	122.72	83.981	75.831	79.781	120.831	60.081	80.531	119.231	85.831	100.475	34.1667
600.827	550.363	525.1	499	515.5	577.65	509.35	539.3	536.55	498.7		157.998	143.795	96.331	60.931	90.581	141.131	38.781	110.531	107.781	69.931	101.779	38.5772
611.946	575.499	511.4	535	514.9	573.15	485.55	518.6	555.45	518.65		190.816	121.594	82.631	70.231	86.731	148.881	80.581	89.831	126.681	89.881	108.786	37.9912
614.101	552.771	504.45	511.9	551.7	552.6	497.8	506.35	521.1	498.95		175.497	146.73	75.681	106.231	86.131	144.381	56.781	77.581	92.331	70.181	103.153	39.2921
629.505	569.757	535.95	517.6	521.85	614.5	526.3	558.8	518	503.9		172.058	124.002	107.181	83.131	122.931	123.831	69.031	130.031	89.231	75.131	109.656	31.3783
572.444	555.257	519.85	544.4	526.4	595.75	552.65	535.95	531.1	556.8		183.177	140.988	91.081	88.831	93.081	185.731	97.531	107.181	102.331	128.031	121.796	36.9661
581.08	611.361	540.15	568.6	531.6	664.8	556.25	570.95	510.2	558.55		185.332	126.488	111.381	115.631	97.631	166.981	123.881	142.181	81.431	129.781	128.072	30.8222
599.794	598.243	622.15	568.6	571.9	667.9	669.7	644.45	489.55	582.65		200.736	182.592	193.381	139.831	102.831	236.031	127.481	215.681	60.781	153.881	161.323	54.5304
589.333	597.71	638.5	628.1	556.3	725.45	677.6	705.8	543.4	627.85		143.675	169.474	209.731	139.831	143.131	239.131	240.931	277.031	114.631	199.081	187.665	53.708
583.796	630.654	670.1	619.65	532.95	672.8	784.45	684.25	550.35	606.55		152.311	168.941	241.331	199.331	127.531	296.681	248.831	255.481	121.581	177.781	198.98	59.294
588.983	609.584	713.55	586.9	563.65	612.35	712.05	759.9	533.15	601.5		171.025	201.885	284.781	190.881	104.181	244.031	355.681	331.131	104.381	172.731	216.071	86.9034
578.184	636.474	686.65	607.65	587.65	705.15	659.45	752.85	532.2	570.55		160.564	180.815	257.881	158.131	134.881	183.581	283.281	324.081	103.431	141.781	192.843	71.5473
582.084	596.409	650.4	528.25	566.55	620.6	655.75	727.85	530.1	630.9		155.027	207.705	221.631	178.881	158.881	276.381	230.681	299.081	101.331	202.131	203.173	58.6122
590.748	580.349	545.7	535.9	524.35	609.05	630.4	746.1	585.75	636.3		160.214	167.64	116.931	99.481	137.781	191.831	226.981	317.331	156.981	207.531	178.27	62.5856
598.207	628.49	559.2	550.15	513.35	590.7	584.3	703.3	522.7	569.05		149.415	151.58	130.431	107.131	95.581	180.281	201.631	274.531	93.931	140.281	152.479	55.2292
600.742	616.782	573.85	523.3	498	583.8	608.75	669.1	549.45	610.9		153.315	199.721	145.081	121.381	84.581	161.931	155.531	240.331	120.681	182.131	156.468	43.9852
607.763	568.028	544.6	536.9	508.75	557.7	592.35	584.55	616.7	586.95		161.979	188.013	115.831	94.531	69.231	155.031	179.981	155.781	187.931	158.181	146.649	40.4247
583.352	550.796	521.1	524.8	498.25	527.8	600.1	569.65	545.3	590.95		169.438	139.259	92.331	108.131	79.981	128.931	163.581	140.881	116.531	162.181	130.124	30.7396
578.131	554.075	513.25	528.05	523.3	537.25	575	599.85	592.3	540.15		171.973	122.027	84.481	96.031	69.481	99.031	171.331	171.081	163.531	111.381	126.035	39.9756
577.833	545.55	499.15	527.85	513.25	524.6	570.6	580.9	531.8	608.25		178.994	125.306	70.381	99.281	94.531	108.481	146.231	152.131	103.031	179.481	125.785	37.1078
563.8	563.594	521.5	510.95	495.55	542.55	581.3	624.05	551.4	577.85		154.583	116.781	92.731	99.081	84.481	95.831	141.831	195.281	122.631	149.081	125.231	34.8904
573.627	550.429	489.7	520.95	520.65	511	533.35	578.7	569.95	557		149.362	134.825	60.931	82.181	66.781	113.781	152.531	149.931	141.181	128.231	117.973	35.4365
539.106	530.204	479.05	528.8	519.65	484	565.65	608.15	575.25	575.55		149.064	121.66	50.281	92.181	91.881	82.231	104.581	179.381	146.481	146.781	116.452	39.0949
540.645	539.628	491.75	489.7	508.8	543.35	560.35	652.25	555.1	572.45		135.031	101.435	62.981	100.031	90.881	55.231	136.881	223.481	126.331	143.681	117.596	48.0738
560.859	560.961	508.95	569.8	515.35	507	550.65	636.65	602.65	561.8		144.858	110.859	80.181	60.931	80.031	114.581	131.581	207.881	173.881	133.031	123.782	44.957
576.574	574.48	490.35	483.55	490.8	512.75	538.35	626	560.85	572.5		110.337	132.192	61.581	141.031	86.581	78.231	121.881	197.231	132.081	143.731	120.488	38.9208
542.711	579.918	505.15	544.45	516	567.7	530.75	621.3	575.15	560.25		111.876	145.711	76.381	54.781	62.031	83.981	109.581	192.531	146.381	131.481	111.473	43.4754
542.534	617.824	514.65	553.9	503.9	545.5	542.25	557	551.3	570.65		132.09	151.149	85.881	115.681	87.231	138.931	101.981	128.231	122.531	141.881	120.559	22.6222
528.747	623.808	526.55	553.15	492.2	489.35	530.7	547.95	565	562.6		147.805	189.055	97.781	125.131	75.131	116.731	113.481	119.181	136.231	133.831	125.436	30.3463
528.046	646.891	469.95	570.2	506.15	536.25	531.55	561.45	615.85	560.9		113.942	195.039	41.181	124.381	63.431	60.581	101.931	132.681	187.081	132.131	115.238	51.1397
504.27	620.186	516.45	524.45	510	485.9	623.05	552	531.8	567.2		113.765	218.122	87.681	141.431	77.381	107.481	102.781	123.231	103.031	138.431	121.334	39.5257
516.513	627.573	501.8	554.85	532.55	502.05	588.05	551.5	586.05	504.35		99.978	191.417	73.031	95.681	81.231	57.131	194.281	122.731	157.281	75.581	114.834	49.8615
510.599	608.822	490.05	562.7	533	519.85	587.6	540.3	536.6	594.15		99.277	198.804	61.281	126.081	103.781	73.281	159.281	111.531	107.831	165.381	120.653	42.672
518.794	675.286	508.3	558.9	512.4	508.6	607.8	548.8	556.9	551.8		75.501	180.053	79.531	133.931	104.231	91.081	158.831	120.031	128.131	123.031	119.435	33.4718
533.967	677.778	502	560.1	616.8	503.45	606.45	596.4	554.9	537.65		87.744	246.517	73.231	130.131	83.631	79.831	179.031	167.631	126.131	108.881	128.276	55.28
512.933	664.574	565.2	565.35	602.9	485.7	596.9	596.8	557.65	575.7		81.83	249.009	136.431	131.331	188.031	74.681	177.681	168.031	128.881	146.931	148.284	51.2285
564.658	658.562	543.8	567.9	567.4	539.8	614.45	546.5	528.7	548.55		90.025	235.805	115.031	136.581	174.131	56.931	168.131	117.731	99.931	119.781	131.408	50.4865
572.015	624.697	527.75	539.6	611.65	549.7	632.95	578.7	553.6	558.3		105.198	229.793	98.981	139.131	138.631	111.031	185.681	149.931	124.831	129.531	141.274	39.8709
589.596	616.577	583.3	487.45	574.15	601.65	619.55	580.3	564.5	510.4		84.164	195.928	154.531	110.831	182.881	120.931	204.181	151.531	135.731	81.631	142.234	43.6366
		560.9	531.9	544.35	535.8	578.45	513.95	560.5	528.05		135.889	187.808	132.131	58.681	145.381	172.881	190.781	85.181	131.731	99.281	133.974	43.5054
		563.35	525.8	547.6	599.8	554.1	618.45	562.05	558.2		143.246		134.581	103.131	115.581	107.031	149.681	189.681	133.281	129.431
				551	567.3			514.9			160.827			97.031	118.831	171.031	125.331		86.131
															122.231	138.531

## Sheet: 200526_gip1_C_8
200526_gip1_C_4										Background corrected	200526_gip1_C_4
551.378	582.674	534.298	534.538	522.4	550.276	522.563	516.313	516.836	520.991										110.439
517.203	588.887	545.645	539.861	513.377	595.211	535.373	526.975	538.229	517.716										131.832	114.594
546.68	576.437	547.626	521.355	555.289	649.052	503.581	521.486	549.417	525.936			176.277	127.901		116.003	143.879	116.166		143.02	111.319
500.279	532.454	562.389	523.969	575.201	612.756	544.577	491.532	488.309	555.23			182.49	139.248		106.98	188.814	128.976		81.912	119.539
503.347	536.676	578.202	543.34	542.072	588.327	529.353	528.946	541.045	598.006			170.04	141.229		148.892	242.655	97.184	109.916	134.648	148.833	Average	Stdev
547.797	558.725	569.364	520.683	562.746	646.655	547.438	495.377	514.728	555.716		144.981	126.057	155.992	128.141	168.804	206.359	138.18	120.578	108.331	191.609	148.903	31.8033
520.712	526.244	538.845	528.206	533.181	646.711	527.787	514.197	574.804	580.37		110.806	130.279	171.805	133.464	135.675	181.93	122.956	115.089	168.407	149.319	141.973	24.8189
510.174	522.52	569.87	533.83	531.808	581.791	577.464	519.795	612.009	568.848		140.283	152.328	162.967	114.958	156.349	240.258	141.041	85.135	205.612	173.973	157.29	43.5971
540.616	518.313	598.589	580.184	560.675	611.385	608.007	528.066	613.167	544.645		93.882	119.847	132.448	117.572	126.784	240.314	121.39	122.549	206.77	162.451	144.401	45.6437
526.868	560.295	556.514	564.824	583.002	596.844	558.003	554.001	554.68	565.762		96.95	116.123	163.473	136.943	125.411	175.394	171.067	88.98	148.283	138.248	136.087	29.6949
530.078	530.994	546.895	507.996	542.562	611.753	554.434	560.102	557.585	556.941		141.4	111.916	192.192	114.286	154.278	204.988	201.61	107.8	151.188	159.365	153.902	36.5198
500.811	543.635	538.593	517.858	533.716	582.846	603.399	508.89	572.896	561.838		114.315	153.898	150.117	121.809	176.605	190.447	151.606	113.398	166.499	150.544	148.924	25.8851
512.691	551.262	533.409	558.208	521.477	557.244	596.124	531.1	562.05	572.965		103.777	124.597	140.498	127.433	136.165	205.356	148.037	121.669	155.653	155.441	141.863	27.5742
504.798	543.675	544.783	541.902	549.604	540.333	580.295	522.924	588.504	549.83		134.219	137.238	132.196	173.787	127.319	176.449	197.002	147.604	182.107	166.568	157.449	24.6625
475.906	550.37	545.13	540.459	554.927	572.139	588.207	504.279	566.532	573.304		120.471	144.865	127.012	158.427	115.08	150.847	189.727	153.705	160.135	143.433	146.37	21.919
522.207	565.707	534.592	581.412	529.487	568.715	560.945	521.635	576.371	652.456		123.681	137.278	138.386	101.599	143.207	133.936	173.898	102.493	169.974	166.907	139.136	25.7527
483.876	575.505	549.028	552.527	527.693	568.493	546.42	553.673	595.102	619.009		94.414	143.973	138.733	111.461	148.53	165.742	181.81	124.703	188.705	246.059	154.413	43.6791
525.694	528.703	536.713	581.155	513.813	530.057	581.826	523.922	572.938	598.812		106.294	159.31	128.195	151.811	123.09	162.318	154.548	116.527	166.541	212.612	148.125	31.0042
505.81	517.195	535.753	554.501	516.259	579.02	603.701	531.563	579.793	611.609		98.401	169.108	142.631	135.505	121.296	162.096	140.023	97.882	173.396	192.415	143.275	31.5739
510.69	545.229	546.966	538.551	548.821	561.635	582.671	490.673	590.057	634.446		69.509	122.306	130.316	134.062	107.416	123.66	175.429	115.238	183.66	205.212	136.681	40.3551
535.221	555.498	533.106	554.973	512.591	562.521	550.944	494.851	597.824	623.019		115.81	110.798	129.356	175.015	109.862	172.623	197.304	147.276	191.427	228.049	157.752	41.2748
530.169	529.46	520.592	522.843	511.361	576.22	552.715	498.215	564.388	612.628		77.479	138.832	140.569	146.13	142.424	155.238	176.274	117.525	157.991	216.622	146.908	36.0932
557.327	512.952	522.057	527.212	551.435	526.805	550.925	526.175	567.348	608.723		119.297	149.101	126.709	174.758	106.194	156.124	144.547	125.166	160.951	206.231	146.908	29.6049
629.172	508.814	544.356	566.994	537.283	516.334	549.14	524.206	565.614	574.243		99.413	123.063	114.195	148.104	104.964	169.823	146.318	84.276	159.217	202.326	135.17	36.436
700.647	535.585	501.253	566.105	537.26	558.645	517.603	550.708	563.137	574.534		104.293	106.555	115.66	132.154	145.038	120.408	144.528	88.454	156.74	167.846	128.168	25.3637
673.924	550.635	519.067	566.667	546.479	596.222	568.658	536.008	534.879	552.054		128.824	102.417	137.959	148.576	130.886	109.937	142.743	91.818	128.482	168.137	128.978	22.707
688.213	549.881	565.635	598.869	580.293	587.401	574.479	566.66	570.738	524.644		123.772	129.188	94.856	116.446	130.863	152.248	111.206	119.778	164.341	145.657	128.835	20.609
709.258	543.168	568.174	627.13	604.672	589.453	589.183	591.459	604.84	568.374		150.93	144.238	112.67	120.815	140.082	189.825	162.261	117.809	198.443	118.247	145.532	30.3785
726.337	559.252	549.336	621.91	593.461	620.288	615.437	658.175	627.906	544.282		222.775	143.484	159.238	160.597	173.896	181.004	168.082	144.311	221.509	161.977	173.687	28.0357
710.545	506.535	557.737	588.049	604.848	667.567	720.478	695.407	596.545	512.589		294.25	136.772	161.777	159.708	198.275	183.056	182.786	129.611	190.148	137.885	177.427	47.57
695.925	498.721	594.602	606.256	551.159	644.877	737.541	694.235	619.358	543.139		267.527	152.855	142.939	160.27	187.064	213.891	209.04	160.263	212.961	106.192	181.3	46.0786
661.307	545.057	618.979	572.168	587.753	684.381	830.671	674.267	626.5	555.731		281.816	100.138	151.34	192.472	198.451	261.17	314.081	185.062	220.103	136.742	204.138	66.922
657.928	551.064	580.125	562.394	575.796	688.187	810.538	644.295	689.521	567.483		302.861	92.324	188.205	220.733	144.762	238.48	331.144	251.778	283.124	149.334	220.274	76.3917
635.315	528.712	584.743	553.47	580.971	678.23	739.587	637.726	743.799	581.365		319.94	138.66	212.582	215.513	181.356	277.984	424.274	289.01	337.402	161.086	255.781	89.7383
633.825	534.572	569.422	542.803	569.945	660.343	701.223	611.27	744.41	562.983		304.148	144.667	173.728	181.652	169.399	281.79	404.141	287.838	338.013	174.968	246.034	88.464
606.158	555.76	547.162	546.975	534.244	605.578	665.887	604.203	700.094	567.869		289.528	122.315	178.346	199.859	174.574	271.833	333.19	267.87	293.697	156.586	228.78	70.752
579.661	533.676	555.971	525.994	533.417	601.5	658.308	593.044	699.282	542.333		254.91	128.175	163.025	165.771	163.548	253.946	294.826	237.898	292.885	161.472	211.646	61.5862
598.332	537.52	535.609	500.66	552.657	578.101	655.715	595.505	615.705	504.246		251.531	149.363	140.765	155.997	127.847	199.181	259.49	231.329	209.308	135.936	186.075	50.1593
561.816	559.626	538.322	533.684	523.775	588.192	613.403	596.66	643.776	520.476		228.918	127.279	149.574	147.073	127.02	195.103	251.911	204.873	237.379	97.849	176.698	53.6857
553.304	554.904	532.744	532.261	566.833	554.927	601.053	560.425	623.202	526.624		227.428	131.123	129.212	136.406	146.26	171.704	249.318	197.806	216.805	114.079	172.014	47.7376
547.634	588.829	539.713	497.357	528.378	552.604	570.547	555.803	620.073	527.087		199.761	153.229	131.925	140.578	117.378	181.795	207.006	186.647	213.676	120.227	165.222	36.8085
574.242	553.674	505.552	535.228	503.506	538.495	563.659	556.419	616.555	544.918		173.264	148.507	126.347	119.597	160.436	148.53	194.656	189.108	210.158	120.69	159.129	32.1568
566.652	560.228	519.666	515.194	485.691	513.875	573.566	560.663	595.147	551.161		191.935	182.432	133.316	94.263	121.981	146.207	164.15	190.263	188.75	138.521	155.182	33.6335
543.768	549.025	526.663	517.192	533.693	537.952	542.953	525.3	586.751	554.615		155.419	147.277	99.155	127.287	97.109	132.098	157.262	154.028	180.354	144.764	139.475	26.1743
572.099	544.164	519.309	522.194	529.983	541.199	550.525	537.772	591.772	554.379		146.907	153.831	113.269	125.864	79.294	107.478	167.169	149.406	185.375	148.218	137.681	31.2615
512.676	560.195	545.877	552.252	534.189	502.52	569.149	567.692	619.831	530.567		141.237	142.628	120.266	90.96	127.296	131.555	136.556	150.022	213.434	147.982	140.194	30.9187
549.771	589.311	538.832	552.395	539.279	518.004	570.366	513.728	561.645	530.218		167.845	137.767	112.912	128.831	123.586	134.802	144.128	154.266	155.248	124.17	138.355	17.0355
561.091	533.677	577.882	563.573	547.387	553.829	567.412	515.241	551.194	534.615		160.255	153.798	139.48	108.797	127.792	96.123	162.752	118.903	144.797	123.821	133.652	22.344
535.696	550.573	556.793	533.512	587.083	562.899	575.618	514.725	574.826	547.45		137.371	182.914	132.435	110.795	132.882	111.607	163.969	131.375	168.429	128.218	139.999	24.0634
556.288	532.122	551.02	560.981	626.074	554.75	567.24	535.212	566.83	508.98		165.702	127.28	171.485	115.797	140.99	147.432	161.015	161.295	160.433	141.053	149.248	17.9943
532.01	530.919	551.675	582.546	573.641	559.841	537.304	522.262	546.591	509.333		106.279	144.176	150.396	145.855	180.686	156.502	169.221	107.331	140.194	102.583	140.322	26.9665
554.308	536.123	514.839	553.953	601.624	581.04	568.368	547.694	550.457	532.337		143.374	125.725	144.623	145.998	219.677	148.353	160.843	108.844	144.06	102.936	144.443	32.1258
558.621	596.397	528.006	549.162	650.166	574.465	531.556	518.572	561.034	591.788		154.694	124.522	145.278	157.176	167.244	153.444	130.907	108.328	154.637	125.94	142.217	18.708
550.099	552.371	532.631	540.241	636.332	618.414	547.934	548.952	567.047	573.307		129.299	129.726	108.442	127.115	195.227	174.643	161.971	128.815	160.65	185.391	150.128	29.2518
556.335	594.044	536.901	552.222	674.427	616.463	560.765	558.807	610.849	566.61		149.891	190	121.609	154.584	243.769	168.068	125.159	115.865	204.452	166.91	164.031	40.2917
557.859	557.938	565.756	546.74	686.49	606.62	553.99	521.016	632.522	542.64		125.613	145.974	126.234	176.149	229.935	212.017	141.537	141.297	226.125	160.213	168.509	40.4364
548.51	529.361	523.159	565.199	632.304	605.808	554.09	523.301	608.648	588.789		147.911	187.647	130.504	147.556	268.03	210.066	154.368	112.175	202.251	136.243	169.675	46.9573
540.631	534.136	529.149	551.312	610.733	571.914	534.087	542.972	612.643	610.096		152.224	151.541	159.359	142.765	280.093	200.223	147.593	142.555	206.246	182.392	176.499	43.2639
541.994	554.513	503.7	536	629.103	580.385	548.694	553.816	657.419	593.669		143.702	122.964	116.762	133.844	225.907	199.411	147.693	152.41	251.022	203.699	169.741	46.5983
553.159	579.185	527.149	509.005	622.068	598.054	547.492	554.139	603.499	592.501		149.938	127.739	122.752	145.825	204.336	165.517	127.69	114.619	197.102	187.272	154.279	32.6987
563.71	542.316	530.733	535.477	585.117	566.53	547.444	540.114	611.8	586.403		151.462	148.116	97.303	140.343	222.706	173.988	142.297	116.904	205.403	186.104	158.463	38.8001
545.352	552.523	535.675	540.529	599.955	536.91	521.417	532.065	602.673	550.848		142.113	172.788	120.752	158.802	215.671	191.657	141.095	136.575	196.276	180.006	165.574	30.6203
541.009	577.859	533.514	524.323	585.625	553.586	517.209	508.697	558.046	576.974		134.234	135.919	124.336	144.915	178.72	160.133	141.047	147.419	151.649	144.451	146.282	15.059
537.007	533.819	533.17	502.641	562.972	543.572	515.516	505.086	528.912			135.597	146.126	129.278	129.603	193.558	130.513	115.02	147.742	122.515	170.577	142.053	23.8535
											146.762	171.462	127.117	102.608	179.228	147.189	110.812	133.717
											157.313	127.422	126.773	129.08	156.575	137.175	109.119	125.668
											138.955			134.132				102.3
											134.612			117.926				98.689
											130.61			96.244

## Sheet: 200526_gip1_C_9
200526_gip1_C_9										Background corrected	200526_gip1_C_9
526.609	511.838	558.334	534.739	546.45	508.556	501.623	509.177	505.482	484.586			89.36			123.972
516.128	508.474	547.397	557.9	535.074	513.048	525.848	524.434	510.154	478.041			85.996			112.596
516.742	532.501	524.67	532.479	557.869	515.517	527.776	514.465	521.947	494.603			110.023	135.856		135.391
544.202	531.3	533.442	530.993	543.305	526.518	543.12	500.028	495.457	514.922		104.131	108.822	124.919		120.827	86.0782		86.699		62.108
555.194	523.415	542.299	548.335	509.35	517.526	567.309	499.094	511.815	511.198		93.65	100.937	102.192	112.261	86.872	90.5695		101.956	83.004	55.563
548.286	513.988	551.372	518.155	515.196	498.221	562.177	509.19	520.996	496.961		94.264	91.51	110.964	135.422	92.718	93.0392		91.987	87.676	72.125
564.144	514.495	559.209	526.555	513.924	494.018	556.339	518.314	497.215	506.269		121.724	92.017	119.821	110.001	91.446	104.04	79.145	77.55	99.469	92.444	98.7657	15.2721
565.903	535.728	550.387	531.718	527.771	527.177	572.052	513.647	500.195	476.747		132.716	113.25	128.894	108.515	105.293	95.0476	103.37	76.616	72.979	88.72	102.54	19.8797
548.66	514.014	545.648	518.204	524.315	513.924	574.485	506.48	533.519	478.457		125.808	91.536	136.731	125.857	101.837	75.7428	105.298	86.712	89.337	74.483	101.334	21.8553
548.232	503.596	541.016	551.267	511.465	517.544	588.851	524.101	501.57	490.873		141.666	81.118	127.909	95.677	88.987	71.5404	120.642	95.836	98.518	83.791	100.568	22.4265
552.033	510.892	539.112	541.386	521.369	518.663	560.375	523.768	513.803	479.467		143.425	88.414	123.17	104.077	98.891	104.699	144.831	91.169	74.737	54.269	102.768	28.553
584.544	539.592	536.436	533.051	535.746	519.432	540.128	522.236	515.297	462.482		126.182	117.114	118.538	109.24	113.268	91.4464	139.699	84.002	77.717	55.979	103.319	25.414
603.152	562.619	524.231	521.797	547.946	517.592	542.385	516.72	513.238	481.848		125.754	140.141	116.634	95.726	125.468	95.0665	133.861	101.623	111.041	68.395	111.371	21.6525
580.595	550.7	540.234	520.736	539.543	510.498	536.011	513.834	509.238	496.24		129.555	128.222	113.958	128.789	117.065	96.185	149.574	101.29	79.092	56.989	110.072	27.3481
576.145	530.289	525.869	539.993	530.464	498.659	525.213	509.675	510.548	502.666		162.066	107.811	101.753	118.908	107.986	96.9535	152.007	99.758	91.325	40.004	107.857	33.5146
585.531	548.643	515.367	541.406	518.419	530.456	497.069	493.852	519.004	490.389		180.674	126.165	117.756	110.573	95.941	95.1138	166.373	94.242	92.819	59.37	113.903	36.314
577.091	553.925	516.335	527.237	530.404	524.843	485.339	488.642	511.154	495.541		158.117	131.447	103.391	99.319	107.926	88.0199	137.897	91.356	90.76	73.762	108.199	26.2408
589.873	535.857	519.765	519.958	539.142	509.616	496.045	496.839	499.162	480.227		153.667	113.379	92.889	98.258	116.664	76.1806	117.65	87.197	86.76	80.188	102.283	23.4495
566.651	523.438	496	509.427	540.441	508.892	510.899	486.907	513.193	480.148		163.053	100.96	93.857	117.515	117.963	107.978	119.907	71.374	88.07	67.911	104.859	27.6066
559.985	526.142	499.826	514.132	532.08	496.394	510.126	487.288	514.962	477.361		154.613	103.664	97.287	118.928	109.602	102.365	113.533	66.164	96.526	73.063	103.575	24.4889
558.784	524.841	511.735	541.326	518.159	501.122	514.98	506.136	541.989	493.5		167.395	102.363	73.522	104.759	95.681	87.1385	102.735	74.361	88.676	57.749	95.438	29.4874
562.685	543.209	504.719	532.307	517.672	511.034	489.745	510.27	537.694	511.929		144.173	120.731	77.348	97.48	95.194	86.4144	74.591	64.429	76.684	57.67	89.4714	26.3439
544.223	539.065	491.006	516.58	538.89	501.803	487.745	507.863	540.348	523.487		137.507	116.587	89.257	86.949	116.412	73.9155	62.861	64.81	90.715	54.883	89.3897	26.9382
530	544.865	500.529	514.998	541.699	499.223	510.422	498.12	531.013	525.862		136.306	122.387	82.241	91.654	119.221	78.6443	73.567	83.658	92.484	71.022	95.1184	22.7389
539.101	529.949	532.845	526.09	530.93	531.537	508.431	493.206	550.811	507.881		140.207	107.471	68.528	118.848	108.452	88.5558	88.421	87.792	119.511	89.451	101.724	20.9918
540.067	538.601	522.613	524.293	519.323	535.39	496.079	494.816	562.812	538.978		121.745	116.123	78.051	109.829	96.845	79.3246	87.648	85.385	115.216	101.009	99.1176	16.1229
569.864	522.057	523.867	537.898	533.532	534.504	498.829	503.754	558.994	542.747		107.522	99.579	110.367	94.102	111.054	76.7447	92.502	75.642	117.87	103.384	98.8767	14.2584
575.761	529.836	539.403	517.488	543.262	563.377	508.826	511.959	586.26	548.621		116.623	107.358	100.135	92.52	120.784	109.059	67.267	70.728	108.535	85.403	97.8412	18.4634
595.17	524.831	561.77	530.024	583.817	565.297	524.798	503.984	586.786	517.066		117.589	102.353	101.389	103.612	161.339	112.912	65.267	72.338	128.333	116.5	108.163	27.1606
591.149	522.427	552.842	571.969	553.73	559.958	553.665	501.732	598.633	512.124		147.386	99.949	116.925	101.815	131.252	112.026	87.944	81.276	140.334	120.269	113.918	21.7386
573.648	552.108	555.372	592.946	547.427	553.615	569.207	513.668	614.857	522.393		153.283	129.63	139.292	115.42	124.949	140.899	85.953	89.481	136.516	126.143	124.157	21.8155
600.391	562.772	585.926	611.419	609.874	556.387	577.539	555.795	642.058	562.933		172.692	140.294	130.364	95.01	187.396	142.819	73.601	81.506	163.782	94.588	128.205	40.1486
702.976	599.826	620.409	635.238	631.034	570.874	606.965	611.555	673.029	604.507		168.671	177.348	132.894	107.546	208.556	137.48	76.351	79.254	164.308	89.646	134.205	45.4103
798.683	608.751	643.605	680.448	655.082	553.12	599.047	637.297	700.427	636.695		151.17	186.273	163.448	149.491	232.604	131.137	86.348	91.19	176.155	99.915	146.773	46.2794
869.209	626.723	658.798	720.813	663.241	562.158	563.099	682.984	735.479	655.609		177.913	204.245	197.931	170.468	240.763	133.909	102.32	133.317	192.379	140.455	169.37	41.6622
1004.37	635.656	642.703	783.707	702.82	533.853	574.706	704.19	757.333	733.529		280.498	213.178	221.127	188.941	280.342	148.396	131.187	189.077	219.58	182.029	205.435	48.996
1071.24	661.893	663.853	753.191	741.189	566.802	570.171	732.402	667.153	797.221		376.205	239.415	236.32	212.76	318.711	130.642	146.729	214.819	250.551	214.217	234.037	72.4311
1039.99	705.031	682.78	685.149	751.804	554.019	571.257	715.845	602.924	748.335		446.731	282.553	220.225	257.97	329.326	139.68	155.061	260.506	277.949	233.131	260.313	87.1155
838.19	714.177	631.236	587.828	788.422	540.782	538.437	650.54	550.823	665.348		581.895	291.699	241.375	298.335	365.944	111.375	184.487	281.712	313.001	311.051	298.087	123.304
653.852	712.521	567.009	554.15	797.115	519.186	530.419	586.801	532.138	619.503		648.76	290.043	260.302	361.229	374.637	144.324	176.569	309.924	334.855	374.743	327.539	138.008
540.947	753.365	555.236	528.459	727.51	510.287	544.763	535.384	523.17	560.212		617.514	330.887	208.758	330.713	305.032	131.541	140.621	293.367	244.675	325.857	292.896	136.671
529.16	788.306	531.029	524.914	602.685	508.743	541.04	528.451	516.665	524.22		415.712	365.828	144.531	262.671	180.207	118.304	152.228	228.062	180.446	242.87	229.086	97.143
514.821	748.845	531.745	515.071	569.883	505.045	518.197	515.667	527.916	516.574		231.374	326.367	132.758	165.35	147.405	96.7076	147.693	164.323	128.345	197.025	173.735	65.2892
514.794	650.046	543.427	522.114	536.588	498.582	506.875	504.132	522.659	498.975		118.469	227.568	108.551	131.672	114.11	87.8094	148.779	112.906	109.66	137.734	129.726	38.392
493.657	586.653	521.201	520.321	517.156	499.548	519.098	495.672	506.73	509.115		106.682	164.175	109.267	105.981	94.678	86.2645	115.959	105.973	100.692	101.742	109.141	20.9761
501.866	548.867	510.504	506.484	515.056	503.563	490.672	510.123	504.432	514.241		92.343	126.389	120.949	102.436	92.578	82.5672	107.941	93.189	94.187	94.096	100.668	13.8742
520.465	511.484	518.692	519.753	493.442	511.368	487.609	536.04	529.678	519.677		92.316	89.006	98.723	92.593	70.964	76.1042	122.285	81.654	105.438	76.497	90.558	15.5426
521.65	516.212	516.827	514.703	495.444	519.109	505.427	521.233	528.02	515.139		71.179	93.734	88.026	99.636	72.966	77.0704	118.562	73.194	100.181	86.637	88.1185	15.2754
521.393	503.36	503.965	504.189	497.478	527.654	527.216	528.242	493.809	504.358		79.388	80.882	96.214	97.843	75	81.0853	95.719	87.645	84.252	91.763	86.9791	8.05188
525.676	493.329	504.963	525.831	490.634	532.715	518.653	516.713	518.86	512.919		97.987	70.851	94.349	84.006	68.156	88.89	84.397	113.562	81.954	97.199	88.1351	13.4662
524.767	503.107	482.026	531.961	498.155	524.204	512.463	540.655	539.491	528.145		99.172	80.629	81.487	97.275	75.677	96.6313	96.62	98.755	107.2	92.661	92.6107	10.0094
517.992	494.865	501.591	512.023	488.186	514.172	520.467	552.438	534.774	524.084		98.915	72.387	82.485	92.225	65.708	105.176	68.194	105.764	105.542	81.88	87.8276	15.8319
505.387	525.68	528.2	508.199	479.937	525.557	514.294	535.18	526.229	509.955		103.198	103.202	59.548	81.711	57.459	110.237	65.131	94.235	71.331	90.441	83.6493	19.4215
513.116	510.179	506.429	515.616	510.02	552.064	511.839	543.32	523.939	503.985		102.289	87.701	79.113	103.353	87.542	101.726	82.949	118.177	96.382	105.667	96.4899	12.0431
537.762	510.016	496.391	517.029	509.247	550.88	522.671	529.58	518.324	524.676		95.514	87.538	105.722	109.483	86.769	91.6941	104.738	129.96	117.013	101.606	103.004	13.5973
531.698	518.099	515.862	533.907	515.008	560.512	519.042	520.326	507.217	506.492		82.909	95.621	83.951	89.545	92.53	103.079	96.175	112.702	112.296	87.477	95.6285	10.7306
543.047	530.021	534.923	556.476	542.69	565.353	526.113	508.533	489.158	511.86		90.638	107.543	73.913	85.721	120.212	129.586	89.985	120.842	103.751	81.507	100.37	18.8627
535.644	548.364	512.588	538.488	537.054	570.545	528.769	494.157	488.109	517.059		115.284	125.886	93.384	93.138	114.576	128.402	97.989	107.102	101.461	102.198	107.942	12.6683
529.371	524.53	500.124	532.593	550.098	567.427	521.491	497.785	505.916	517.042		109.22	102.052	112.445	94.551	127.62	138.034	91.816	97.848	95.846	84.014	105.345	16.8061
553.456	518.622	509.89	520.734	538.99	560.235	526.278	524.964	515.647	536.968		120.569	96.144	90.11	111.429	116.512	142.875	89.361	86.055	84.739	89.382	102.718	19.3125
534.269	509.56	533.497	494.978	530.182	559.472	527.963	512.805	509.937	527.997		113.166	87.082	77.646	133.998	107.704	148.067	100.193	71.679	66.68	94.581	100.08	26.4728
567.895	529.568	522.867	493.365	568.073	547.79	536.07	510.186	514.785	540.457		106.893	107.09	87.412	116.01	145.595	144.949	96.564	75.307	65.631	94.564	104.002	26.4241
553.805	544.287	527.036	512.772	567.336	566.372	530.59	516.786	522.17	533.521		130.978	121.809	111.019	110.115	144.858	137.757	103.635	102.486	83.438	114.49	116.058	18.3234
528.196	556.27	532.476	502.092	581.196	529.805	528.838	518.499	495.917	524.696		111.791	133.792	100.389	98.256	158.718	136.994	106.291	90.327	93.169	105.519	113.525	22.3149
546.797	555.784	552.68	488.774	613.665	536.365	518.172	534.434	492.199	505.464		145.417	133.306	104.558	72.5	191.187	125.312	99.013	87.708	87.459	117.979	116.444	34.6945
555.51	535.543	561.764	491.311	597.126	575.074	529.425	536.621	516.431	515.045		131.327	113.065	109.998	70.887	174.648	143.894	103.8	94.308	92.307	111.043	114.528	29.2803
531.124	531.752	557.83	489.909	553.876	568.604	527.085	504.459	522.278	532.256		105.718	109.274	130.202	90.294	131.398	107.327	105.485	96.021	99.692	102.218	107.763	13.387
545.198	537.977	550.269	501.847	546.273	565.356	539.76	526.041	516.783	529.359		124.319	115.499	139.286	79.614	123.795	113.887	113.592	111.956	73.439	82.986	107.837	21.7513
587.161	564.293	550.412	520.908	539.335	585.428	520.711	542.56	525.259	508.931		133.032	141.815	135.352	66.296	116.857	152.596	108.112	114.143	69.721	92.567	113.049	29.4598
619.623	577.997	550.746	526.568	539.721	587.757	539.148	544.077	549.915	533.631		108.646	155.519	127.791	68.833	117.243	146.126	106.36	81.981	93.953	109.778	111.623	26.8165
603.461	556.459	568.199	520.017	565.344	573.399	538.756	553.053	527.755	571.226		122.72	133.981	127.934	67.431	142.866	142.877	95.694	103.563	99.8	106.881	114.375	24.0375
589.591	515.837	555.285	505.411	573.036	590.727	560.098	551.106	547.167	558.982		164.683	93.359	128.268	79.369	150.558	162.95	106.947	120.082	94.305	86.453	118.697	31.8731
586.402	532.365	533.276	537.508	596.75	584.205	566.559	529.72	524.648	564.902		197.145	109.887	145.721	98.43	174.272	165.279	104.607	121.599	102.781	111.153	133.087	35.0833
											180.983		132.807	104.09		150.921	117.282	130.575	127.437	148.748
											167.113		110.798	97.539		168.249	98.233	128.628	105.277	136.504
											163.924			82.933		161.727	116.67	107.242	124.689	142.424
														115.03			116.278		102.17
																	137.62
																	144.081

## Sheet: 200526_nocako_gip1_9
200526_nocako_gip1_9										Background corrected	200526_nocako_gip1_9
537.571	502.301	488.177	542.987	525.128	488	506.999	498.147	492.369	483.866								53.155	44.303
518.205	509.978	494.107	543.837	530.766	512.648	515.502	500.333	492.372	538.224								61.658	46.489	38.525	30.022
525.217	499.941	517.734	536.272	540.672	534.672	515.647	522.48	487.537	544.593				34.333		71.284		61.803	68.636	38.528	84.38
559.861	508.491	512.065	530.405	524.734	560.502	520.21	510.093	507.331	504.643				40.263		76.922		66.366	56.249	33.693	90.749
583.516	486.789	541.106	540.977	522.635	561.616	522.053	509.123	489.233	520.08				63.89		86.828	34.156	68.209	55.279	53.487	50.799
578.398	487.106	550.782	524.227	508.87	557.033	512.862	494.143	493.619	541.547		83.727	48.4573	58.221		70.89	58.804	59.018	40.299	35.389	66.236	Average	Stdev
532.557	504.795	532.948	528.429	490.834	580.531	508.579	514.715	514.001	524.482		64.361	56.1337	87.262	89.143	68.791	80.828	54.735	60.871	39.775	87.703	68.9603	16.7985
529.783	521.325	515.895	510.367	511.094	582.554	519.044	519.095	518.106	544.688		71.373	46.0967	96.938	89.993	55.026	106.658	65.2	65.251	60.157	70.638	72.7331	19.2494
534.812	540.74	516.979	524.727	519.22	604.993	522.804	512.418	503.962	550.718		106.017	54.6475	79.104	82.428	36.99	107.772	68.96	58.574	64.262	90.844	74.9599	22.7051
547.957	534.879	506.81	505.501	511.912	610.203	520.972	518.158	533.728	549.349		129.672	32.9455	62.051	76.561	57.25	103.189	67.128	64.314	50.118	96.874	74.0102	28.4827
510.269	527.44	501.555	519.457	539.413	626.507	525.095	528.761	507.202	531.082		124.554	33.2616	63.135	87.133	65.376	126.687	71.251	74.917	79.884	95.505	82.1704	28.2726
507.407	515.656	500.527	523.023	517.645	556.035	520.234	527.148	491.395	513.697		78.713	50.9513	52.966	70.383	58.068	128.71	66.39	73.304	53.358	77.238	71.0081	22.7582
531.74	526.332	495.495	503.11	501.395	545.549	502.152	529.851	505.948	484.901		75.939	67.4808	47.711	74.585	85.569	151.149	48.308	76.007	37.551	59.853	72.4153	31.6073
526.834	551.167	506.767	510.723	514.212	529.055	498.364	549.281	500.686	490.17		80.968	86.8958	46.683	56.523	63.801	156.359	44.52	95.437	52.104	31.057	71.4348	36.1169
538.471	552.489	509.85	519.467	541.49	532.436	487.203	518.949	490.333	524.026		94.113	81.0349	41.651	70.883	47.551	172.663	33.359	65.105	46.842	36.326	68.9528	41.6027
545.107	537.101	517.432	518.016	532.351	514.212	490.689	522.851	496.845	527.911		56.425	73.5959	52.923	51.657	60.368	102.191	36.845	69.007	36.489	70.182	60.9683	19.3272
528.526	532.994	524.354	514.558	541.604	514.882	502.936	494.948	529.232	499.758		53.563	61.8117	56.006	65.613	87.646	91.705	49.092	41.104	43.001	74.067	62.3609	17.5399
520.846	573.288	516.629	520.619	569.89	506.64	534.688	518.731	505.043	482.653		77.896	72.4884	63.588	69.179	78.507	75.211	80.844	64.887	75.388	45.914	70.3902	10.3346
540.606	563.811	510.437	513.943	536.627	504.397	529.509	522.344	489.262	492.919		72.99	97.3228	70.51	49.266	87.76	78.592	75.665	68.5	51.199	28.809	68.0614	20.0605
530.765	531.335	505.786	520.776	541.954	503.87	533.664	524.409	476.962	514.343		84.627	98.6453	62.785	56.879	116.046	60.368	79.82	70.565	35.418	39.075	70.4228	25.2079
516.499	512.073	509.396	528.341	563.486	493.334	522.508	524.227	505.39	500.228		91.263	83.2566	56.593	65.623	82.783	61.038	68.664	70.383	23.118	60.499	66.3221	18.9307
514.28	507.868	506.978	526.569	530.88	514.256	516.918	516.884	510.075	492.65		74.682	79.1499	51.942	64.172	88.11	52.796	63.074	63.04	51.546	46.384	63.4896	13.583
512.208	512.163	494.625	520.451	517.339	524.722	524.274	556.573	507.449	509.642		67.002	119.444	55.552	60.714	109.642	50.553	70.43	102.729	56.231	38.806	73.1103	27.5592
526.595	508.521	501.092	517.435	545.762	546.906	527.52	537.748	493.035	525.951		86.762	109.967	53.134	66.775	77.036	50.026	73.676	83.904	53.605	55.798	71.0683	19.1123
525.388	513.441	523.34	536.443	556.112	494.571	538.3	519.002	485.57	521.352		76.921	77.4913	40.781	60.099	63.495	39.49	84.456	65.158	39.191	72.107	61.9189	16.872
536.451	513.839	508.978	551.584	540.345	510.494	536.88	523.258	496.46	508.726		62.655	58.2294	47.248	66.932	91.918	60.412	83.036	69.414	31.726	67.508	63.9078	16.8725
554.551	525.56	520.158	521.568	562.062	517.773	523.961	522.991	484.021	517.047		60.436	54.024	69.496	74.497	102.268	70.878	70.117	69.147	42.616	54.882	66.8361	15.9452
547.276	536.903	540.456	509.232	532.721	531.475	526.783	526.099	497.536	505.958		58.364	58.3195	55.134	72.725	86.501	93.062	72.939	72.255	30.177	63.203	66.268	17.6727
530.623	535.979	540.951	536.385	525.754	534.635	529.323	536.649	502.002	502.396		72.751	54.6765	66.314	66.607	108.218	40.727	75.479	82.805	43.692	52.114	66.3384	20.1575
549.16	546.719	524.232	526.629	520.376	520.425	529.677	542.05	492.703	507.181		71.544	59.5974	86.612	63.591	78.877	56.65	75.833	88.206	48.158	48.552	67.762	14.671
565.864	527.247	531.527	571.237	523.444	534.023	527.039	563.462	532.253	522.341		82.607	59.9946	87.107	82.599	71.91	63.929	73.195	109.618	38.859	53.337	72.3156	19.7892
597.155	534.116	515.129	587.748	529.862	529.302	496.108	577.612	537.426	524.176		100.707	71.7161	70.388	97.74	66.532	77.631	42.264	123.768	78.409	68.497	79.7652	22.5227
601.982	549.324	515.386	654.089	541.892	544.925	522.023	564.119	529.302	553.786		93.432	83.0591	77.683	67.724	69.6	80.791	68.179	110.275	83.582	70.332	80.4657	13.396
637.709	563.254	527.786	620.141	538.744	617.023	549.015	543.665	520.871	532.491		76.779	82.1345	61.285	55.388	76.018	66.581	95.171	89.821	75.458	99.942	77.8578	14.3987
616.738	544.761	537.607	605.035	590.064	672.958	576.085	561.899	547.24	598.82		95.316	92.8752	61.542	82.541	88.048	80.179	122.241	108.055	67.027	78.647	87.6471	18.163
623.588	560.059	558.451	598.694	659.782	653.162	594.176	562.092	568.031	598.676		112.02	73.4031	73.942	72.785	84.9	75.458	140.332	108.248	93.396	144.976	97.946	27.5294
599.295	557.342	595.22	575.472	698.751	634.088	613.274	585.21	628.07	595.263		143.311	80.2725	83.763	117.393	136.22	91.081	159.43	131.366	114.187	144.832	120.186	27.6385
611.396	543.635	591.73	585.175	674.27	620.09	628.237	575.522	649.553	642.196		148.138	95.4798	104.607	133.904	205.938	163.179	174.393	121.678	174.226	141.419	146.296	34.187
558.453	539.276	577.634	583.42	661.34	619.708	597.734	606.73	608.574	635.42		183.865	109.41	141.376	200.245	244.907	219.114	143.89	152.886	195.709	188.352	177.975	40.7663
577.59	534.238	549.684	547.025	649.404	558.2	557.889	586.456	603.916	568.694		162.894	90.9175	137.886	166.297	220.426	199.318	104.045	132.612	154.73	181.576	155.07	40.3292
585.375	552.316	522.151	545.902	636.444	532.635	563.706	594.872	572.166	600.927		169.744	106.215	123.79	151.191	207.496	180.244	109.862	141.028	150.072	114.85	145.449	33.2262
550.449	532.304	539.953	556.149	600.284	531.533	593.084	581.001	559.78	602.871		145.451	103.498	95.84	144.85	195.56	166.246	139.24	127.157	118.322	147.083	138.325	29.3807
555.099	535.877	542.428	544.529	595.328	563.676	607.614	550.352	566.431	582.261		157.552	89.7914	68.307	121.628	182.6	165.864	153.77	96.508	105.936	149.027	129.098	37.8955
569.329	536.758	521.944	529.69	602.245	537.892	622.122	531.686	572.537	534.678		104.609	85.4319	86.109	131.331	146.44	104.356	168.278	77.842	112.587	128.417	114.54	29.0371
570.47	519.966	498.362	537.336	560.979	543.734	619.783	570.686	536.025	534.842		123.746	80.3943	88.584	129.576	141.484	78.791	165.939	116.842	118.693	80.834	112.488	29.6514
539.994	529.676	517.529	508.774	543.151	545.366	645.194	555.457	532.803	555.838		131.531	98.4719	68.1	93.181	148.401	77.689	191.35	101.613	82.181	80.998	107.352	38.5669
562.638	511.746	510.276	528.029	564.423	528.852	640.355	538.795	567.934	552.203		96.605	78.46	44.518	92.058	107.135	109.832	186.511	84.951	78.959	101.994	98.1023	36.3405
571.887	529.24	524.396	515.462	520.402	535.558	636.88	539.363	567.046	568.6		101.255	82.0332	63.685	102.305	89.307	84.048	183.036	85.519	114.09	98.359	100.364	32.1833
578.791	536.617	544.881	543.066	515.111	532.378	656.474	534.081	582.028	587.846		115.485	82.9142	56.432	90.685	110.579	89.89	202.63	80.237	113.202	114.756	105.681	39.0492
589.06	534.306	547.063	524.904	535.647	562.672	661.617	522.968	592.399	544.915		116.626	66.1222	70.552	75.846	66.558	91.522	207.773	69.124	128.184	134.002	102.631	45.3561
558.584	548.404	533.92	543.094	547.783	567.581	616.27	502.347	592.489	527.027		86.15	75.8315	91.037	83.492	61.267	75.008	162.426	48.503	138.555	91.071	91.3341	34.3476
550.053	538.411	515.65	560.507	558.861	573.225	558.756	510.837	563.315	558.327		108.794	57.9022	93.219	54.93	81.803	81.714	104.912	56.993	138.645	73.183	85.2095	26.8558
586.113	535.352	529.98	555.122	562.593	564.338	542.696	524.073	550.223	559.79		118.043	75.3958	80.076	74.185	93.939	78.534	88.852	70.229	109.471	104.483	89.3208	16.5722
567.814	568.084	543.236	538.845	545.234	573.034	548.644	506.171	569.905	563.085		124.947	82.7728	61.806	61.618	105.017	108.828	94.8	52.327	96.379	105.946	89.4441	24.0096
564.236	553.352	549.117	543.033	526.53	549.058	525.136	557.648	553.503	577.523		135.216	80.462	76.136	89.222	108.749	113.737	71.292	103.804	116.061	109.241	100.392	20.4212
559.645	557.515	553.172	579.27	551.449	595.389	509.584	582.271	547.779	590.324		104.74	94.56	89.392	71.06	91.39	119.381	55.74	128.427	99.659	123.679	97.8028	22.9285
560.183	558.955	569.367	586.309	563.749	568.291	515.722	554.382	527.359	568.31		96.209	84.567	95.273	89.25	72.686	110.494	61.878	100.538	93.935	136.48	94.131	20.3397
543.938	539.142	584.444	592.96	565.832	627.764	535.412	561.833	522.609	547.196		132.269	81.5082	99.328	106.663	97.605	119.19	81.568	107.989	73.515	114.466	101.41	18.5487
552.886	563.917	579.462	574.928	598.374	656.695	544.519	534.778	536.979	502.341		113.97	114.24	115.523	101.278	109.905	95.214	90.675	80.934	68.765	93.352	98.3856	15.6552
543.114	543.869	556.903	543.161	647.64	618.505	569.239	532.577	544.406	521.525		110.392	99.5079	130.6	85.001	111.988	141.545	115.395	78.733	83.135	48.497	100.479	27.413
567.61	549.886	572.581	567.014	677.606	605.766	572.78	507.024	548.465	551.181		105.801	103.671	125.618	89.189	144.53	114.447	118.936	53.18	90.562	67.681	101.362	27.239
596.052	569.907	568.022	565.145	645.454	611.726	571.073	531.863	524.51	532.247		106.339	105.111	103.059	125.426	193.796	173.92	117.229	78.019	94.621	97.337	119.486	36.5195
571.657	540.134	536.852	588.871	633.369	608.733	611.096	527.131	546.365	511.895		90.094	85.2978	118.737	132.465	223.762	202.851	157.252	73.287	70.666	78.403	123.281	55.2899
562.639	540.998	521.832	569.873	635.678	596.505	611.57	502.953	512.938	528.802		99.042	110.073	114.178	139.116	191.61	164.661	157.726	49.109	92.521	58.051	117.609	46.0001
539.427	537.511	525.333	585.276	621.849	560.76	591.686	526.784	521.409	572.245		89.27	90.0249	83.008	121.084	179.525	151.922	137.842	72.94	59.094	74.958	105.967	39.5484
537.385	537.798	530.34	571.288	597.586	566.583	640.005	558.22	534.375	545.606		113.766	96.0416	67.988	89.317	181.834	157.882	186.161	104.376	67.565	118.401	118.333	43.2867
537.198	519.425	557.635	552.123	621.824	565.675	636.451	549.498	523.319	567.107		142.208	116.063	71.489	113.17	168.005	154.889	182.607	95.654	80.531	91.762	121.638	38.4001
523.425	525.236	565.262	560.543	606.355	564.666	596.076	551.477	550.89	567.601		117.813	86.2899	76.496	111.301	143.742	142.661	142.232	97.633	69.475	113.263	110.091	27.4821
517.079	538.683	542.277	591.808	577.028	571.168	588.792	533.858	515.273	552.556		108.795	87.1542	103.791	135.027	167.98	106.916	134.948	80.014	97.046	113.757	113.543	26.1139
	524.063	553.97	543.435	572.529	530.3	594.72	546.672	533.172	569.847		85.583	83.667	111.418	116.029	152.511	112.739	140.876	92.828	61.429	98.712	105.579	27.2478
		564.863					518.564	501.657	568.863		83.541	83.9536	88.433	131.432	123.184	111.831		64.72	79.328	116.003
							523.184	520.05	570.076		83.354	65.5811	100.126	117.444	118.685	110.822		69.34	47.813	115.019
							518.826	548.129	554.33		69.581	71.3925	111.019	98.279		117.324		64.982	66.206	116.232
							536.121	547.211	527.842		63.235	84.8395		106.699		76.456		82.277	94.285	100.486
												70.2193		137.964					93.367	73.998
														89.591

## Sheet: 200526_nocako_gip1_8
200526_nocako_gip1_8													Background corrected	200526_nocako_gip1_8
505.579	525.164	561.5	552.709	568.888	600.316	533.155	515.003	539.496	549.712	549.358	526.115	524.57				112.055		119.443					100.267	99.913	76.67	75.125
525.181	536.781	560.89	554.143	581.141	578.054	573.137	518.641	509.504	565.295	515.061	547.007	492.23				111.445	103.264	131.696	150.871	83.71	65.558	90.051	115.85	65.616	97.562	42.785
519.406	524.905	533.639	569.81	564.368	573.592	572.019	530.024	507.002	538.488	506.148	507.962	506.437				84.194	104.698	114.923	128.609	123.692	69.196	60.059	89.043	56.703	58.517	56.992	Average	Stdev
517.317	577.911	557.061	552	574.382	534.21	573.382	523.075	516.482	518.047	533.376	516.68	466.743		56.134	75.719	107.616	120.365	124.937	124.147	122.574	80.579	57.557	68.602	83.931	67.235	17.298	85.1303	33.1191
538.929	562.218	557.226	516.636	568.351	571.124	591.435	510.009	522.587	525.674	508.867	548.135	512.503		75.736	87.336	107.781	102.555	118.906	84.7653	123.937	73.63	67.037	76.229	59.422	98.69	63.058	87.6217	21.1085
542.829	552.652	557.113	526.139	580.022	585.415	585.036	515.704	515.175	525.286	516.723	524.299	520.558		69.961	75.46	107.668	67.191	130.577	121.679	141.99	60.564	73.142	75.841	67.278	74.854	71.113	87.486	27.6432
508.991	567.303	559.592	538.027	594.301	597.644	573.376	516.996	530.985	516.903	525.585	539.899	530.812		67.872	128.466	110.147	76.694	144.856	135.97	135.591	66.259	65.73	67.458	76.14	90.454	81.367	95.9234	30.5842
517.355	608.118	528.78	529.907	572.733	603.481	571.726	504.018	511.298	542.319	482.433	518.66	535.73		89.484	112.773	79.335	88.582	123.288	148.2	123.931	67.551	81.54	92.874	32.988	69.215	86.285	92.0035	29.5931
541.115	627.714	526.469	561.634	594.571	599.316	554.74	518.628	514.905	563.848	495.067	562.144	527.217		93.384	103.207	77.024	80.462	145.126	154.036	122.281	54.573	61.853	114.403	45.622	112.699	77.772	95.5724	33.5411
552.516	644.902	527.954	602.108	566.367	583.554	583.029	509.995	516.602	537.209	507.333	534.593	539.334		59.546	117.858	78.509	112.189	116.922	149.871	105.295	69.183	65.46	87.764	57.888	85.148	89.889	91.9632	27.2585
506.394	645.893	534.91	603.267	572.006	549.76	582.263	523.127	499.367	537.593	481.678	511.863	510.346		67.91	158.673	85.465	152.663	122.561	134.109	133.584	60.55	67.157	88.148	32.233	62.418	60.901	94.3363	40.9768
535.487	626.508	549.769	610.988	596.94	562.14	584.93	563.91	527.315	538.633	509.28	528.822	510.389		91.67	178.269	100.324	153.822	147.495	100.315	132.818	73.682	49.922	89.188	59.835	79.377	60.944	101.359	40.0858
525.734	607.48	548.889	561.325	610.163	566.333	568.079	548.569	548.018	535.83	502.841	495.102	500.072		103.071	195.457	99.444	161.543	160.718	112.695	135.485	114.465	77.87	86.385	53.396	45.657	50.627	107.447	46.3164
504.065	601.139	514.592	565.289	639.04	527.621	571.968	569.239	539.364	505.57	522.945	500.585	482.997		56.949	196.448	65.147	111.88	189.595	116.888	118.634	99.124	98.573	56.125	73.5	51.14	33.552	97.5042	50.4339
525.972	567.827	522.06	571.953	612.257	506.414	545.335	553.798	547.139	529.851	542.515	496.725	514.61		86.042	177.063	72.615	115.844	162.812	78.1757	122.523	119.794	89.919	80.406	93.07	47.28	65.165	100.824	37.6086
516.669	569.842	506.407	561.797	558.814	515.986	577.271	543.839	564.402	535.238	515.603	510.888	513.348		76.289	158.035	56.962	122.508	109.369	56.9691	95.89	104.353	97.694	85.793	66.158	61.443	63.903	88.8743	29.9963
528.893	542.532	490.27	530.977	568.561	506.099	571.369	556.691	572.928	516.245	514.738	515.932	495.862		54.62	151.694	40.825	112.352	119.116	66.5415	127.826	94.394	114.957	66.8	65.293	66.487	46.417	86.7171	35.2463
550.755	555.92	524.62	588.634	592.142	535	557.623	529.241	590.897	519.294	529.043	508.552	509.693		76.527	118.382	75.175	81.532	142.697	56.6542	121.924	107.246	123.483	69.849	79.598	59.107	60.248	90.1863	28.8076
548.074	545.215	539.913	597.85	566.055	519.04	525.586	543.565	610.274	522.848	510.395	501.278	526.678		67.224	120.397	90.468	139.189	116.61	85.5554	108.178	79.796	141.452	73.403	60.95	51.833	77.233	93.253	29.2599
539.962	543.896	527.214	578.009	566.389	523.531	503.857	522.249	586.798	511.924	513.988	512.174	511.876		79.448	93.087	77.769	148.405	116.944	69.5947	76.141	94.12	160.829	62.479	64.543	62.729	62.431	89.8861	32.8619
589.612	535.582	523.176	593.529	538.683	520.705	524.771	516.058	566.977	491.004	503.835	503.548	508.579		101.31	106.475	73.731	128.564	89.238	74.086	54.412	72.804	137.353	41.559	54.39	54.103	59.134	80.5507	30.1451
584.636	556.495	533.393	561.474	579.895	522.676	543.112	536.813	542.836	493.754	518.67	508.698	493.202		98.629	95.77	83.948	144.084	130.45	71.2601	75.326	66.613	117.532	44.309	69.225	59.253	43.757	84.6274	31.3647
562.067	567.507	553.097	577.896	539.914	515.377	515.279	553.787	553.12	515.388	542.368	529.642	494.296		90.517	94.451	103.652	112.029	90.469	73.2308	93.667	87.368	93.391	65.943	92.923	80.197	44.851	86.3607	17.2111
610.345	542.441	593.743	559.299	542.112	544.79	513.286	505.891	540.698	534.508	551.269	515.739	509.487		140.167	86.137	144.298	128.451	92.667	65.9323	65.834	104.342	103.675	85.063	101.824	66.294	60.042	95.7482	28.454
544.272	540.4	625.155	564.199	548.882	505.002	530.677	511.32	535.575	594.745	540.999	498.746	538.762		135.191	107.05	175.71	109.854	99.437	95.3449	63.841	56.446	91.253	145.3	91.554	49.301	89.317	100.738	35.6148
567.998	575.387	660.598	548.185	543.029	526.473	538.16	539.78	522.362	557.887	542.395	538.683	535.724		112.622	118.062	211.153	114.754	93.584	55.5573	81.232	61.875	86.13	108.442	92.95	89.238	86.279	100.914	38.1738
631.096	534.73	731.697	533.342	553.754	538.25	570.756	524.797	542.916	535.606	531.853	541.625	544.79		160.9	92.996	282.252	98.74	104.309	77.028	88.715	90.335	72.917	86.161	82.408	92.18	95.345	109.56	56.1778
628.585	537.852	702.757	543.457	546.207	574.756	578.882	510.607	554.228	565.665	534.804	536.549	574.255		94.827	90.955	253.312	83.897	96.762	88.8052	121.311	75.352	93.471	116.22	85.359	87.104	124.81	108.63	46.0106
609.537	587.157	660.286	534.472	506.064	598.433	610.029	519.654	574.082	545.412	528.852	560.111	602.612		118.553	125.942	210.841	94.012	56.619	125.311	129.437	61.162	104.783	95.967	79.407	110.666	153.167	112.759	40.3358
661.103	576.026	620.984	546.32	511.444	582.565	562.554	505.239	589.766	569.097	551.923	580.109	648.678		181.651	85.285	171.539	85.027	61.999	148.988	160.584	70.209	124.637	119.652	102.478	130.664	199.233	126.304	44.1773
650.091	575.559	601.235	552.535	542.476	587.037	543.325	522.902	631.682	621.365	547.801	620.09	649.306		179.14	88.407	151.79	96.875	93.031	133.12	113.109	55.794	140.321	171.92	98.356	170.645	199.861	130.182	43.0913
640.662	582.528	600.2	606.308	521.864	587.426	552.024	547.885	602.024	606.465	551.013	601.655	649.216		160.092	137.712	150.755	103.09	72.419	137.592	93.88	73.457	182.237	157.02	101.568	152.21	199.771	132.446	40.3583
603.049	575.49	571.079	552.431	522.43	554.216	562.74	538.329	611.611	590.44	534.414	572.807	613.434		211.658	126.581	121.634	156.863	72.985	137.981	102.579	98.44	152.579	140.995	84.969	123.362	163.989	130.355	36.957
575.944	540.953	578.579	543.683	549.219	542.438	515.198	540.613	561.078	615.226	539.468	527.603	617.582		200.646	126.114	129.134	102.986	99.774	104.771	113.295	88.884	162.166	165.781	90.023	78.158	168.137	125.375	37.6753
576.248	524.267	553.523	533.338	566.244	555.717	535.297	555.737	562.951	634.693	533.989	541.013	640.201		191.217	133.083	104.078	94.238	116.799	92.9928	65.753	91.168	111.633	185.248	84.544	91.568	190.756	119.468	42.8849
592.338	531.431	559.422	541.374	582.364	541.558	543.064	561.715	551.331	682.386	500.514	570.399	605.606		153.604	126.045	109.977	83.893	132.919	106.272	85.852	106.292	113.506	232.941	51.069	120.954	156.161	121.499	43.8824
555.954	535.019	535.719	536.135	552.849	528.188	559.757	541.616	544.372	621.729	527.581	571.13	584.841		126.499	91.508	86.274	91.929	103.404	92.1131	93.619	112.27	101.886	172.284	78.136	121.685	135.396	108.231	25.5634
528.528	573.093	528.3	534.136	548.459	551.795	571.375	533.805	545.403	632.824	541.02	589.187	574.963		126.803	74.822	78.855	86.69	99.014	78.7425	110.312	92.171	94.927	183.379	91.575	139.742	125.518	106.35	30.7575
542.137	532.8	554.628	540.851	558.938	568.691	552.197	553.758	593.46	630.756	532.425	590.57	577.966		142.893	81.986	105.183	84.691	109.493	102.35	121.93	84.36	95.958	181.311	82.98	141.125	128.521	112.522	29.7639
512.323	509.08	535.735	536.616	558.009	528.089	552.969	563.12	612.398	567.663	526.112	556.328	549.546		106.509	85.574	86.29	91.406	108.564	119.246	102.752	104.313	144.015	118.218	76.667	106.883	100.101	103.888	17.4327
529.397	519.001	517.243	544.493	525.753	550.592	552.866	574.627	556.139	599.413	511.943	596.462	616.648		79.083	123.648	67.798	87.171	76.308	78.6441	103.524	113.675	162.953	149.968	62.498	147.017	167.203	109.192	37.5388
553.863	534.522	504.173	499.796	534.777	540.315	558.881	548.796	545.755	598.441	500.813	574.342	607.346		92.692	83.355	54.728	95.048	85.332	101.147	103.421	125.182	106.694	148.996	51.368	124.897	157.901	102.366	31.5924
562.154	556.791	515.894	504.018	567.134	516.004	570.788	588.93	552.431	559.457	522.556	609.394	566.334		62.878	59.635	66.449	50.351	117.689	90.8704	109.436	99.351	96.31	110.012	73.111	159.949	116.889	93.3023	30.5732
571.389	559.148	523.931	524.215	569.905	528.669	558.961	563.523	538.085	559.28	514.462	611.199	558.49		79.952	69.556	74.486	54.573	120.46	66.559	121.343	139.485	102.986	109.835	65.017	161.754	109.045	98.0808	32.6238
553.519	545.476	542.098	511.859	562.625	538.215	558.186	541.282	546.907	561.423	542.524	583.815	539.617		104.418	85.077	92.653	74.77	113.18	79.2241	109.516	114.078	88.64	111.978	93.079	134.37	90.172	99.3196	16.8798
546.759	540.033	524.788	514.755	562.093	515.307	576.898	535.42	569.788	590.183	516.44	551.243	545.286		112.709	107.346	75.343	62.414	112.648	88.77	108.741	91.837	97.462	140.738	66.995	101.798	95.841	97.1263	21.0828
549.008	542.543	510.131	506.372	567.681	537.46	576.759	561.987	558.228	622.305	519.705	571.961	550.101		121.944	109.703	60.686	65.31	118.236	65.8615	127.453	85.975	120.343	172.86	70.26	122.516	100.656	103.216	32.5997
536.997	562.509	509.87	515.812	554.158	544.776	561.886	565.051	566.81	588.639	537.902	553.472	577.688		104.074	96.031	60.425	56.927	104.713	88.015	127.314	112.542	108.783	139.194	88.457	104.027	128.243	101.442	24.2494
546.793	535.824	522.598	548.473	577.223	531.145	538.317	569.152	586.861	591.597	542.947	573.654	555.693		97.314	90.588	73.153	66.367	127.778	95.3311	112.441	115.606	117.365	142.152	93.502	124.209	106.248	104.773	21.5811
594.446	581.141	525.532	535.201	561.882	515.763	589.789	571.458	561.567	573.937	557.891	546.948	538.096		99.563	93.098	76.087	99.028	112.437	81.6996	88.872	119.707	137.416	124.492	108.446	97.503	88.651	102.077	17.7306
603.281	539.111	527.955	515.801	555.787	503.58	558.86	581.944	588.463	560.079	588.373	570.761	535.339		87.552	113.064	78.51	85.756	106.342	66.3181	140.344	122.013	112.122	110.634	138.928	121.316	85.894	105.292	22.9891
538.685	554.207	537.081	515.113	540.744	513.63	532.133	551.445	579.902	588.331	579.697	545.995	541.424		97.348	86.379	87.636	66.356	91.299	54.1355	109.415	132.499	139.018	138.886	130.252	96.55	91.979	101.673	27.0663
	545.604	537.689	536.461	555.142	549.048	575.956	590.048	608.715	581.043	556.722	571.124	558.834		145.001	131.696	88.244	65.668	105.697	64.1849	82.688	102	130.457	131.598	107.277	121.679	109.389	106.583	25.7217
		545.576	520.75	546.491	537.389	566.377	613.798	583.929	596.445	559.431	578.802	582.091		153.836	89.666	96.131	87.016	97.046	99.6034	126.511	140.603	159.27	147	109.986	129.357	132.646	120.667	25.406
		552.832	513.042	534.554	526.883	538.188	576.874	571.118	564.579	553.438	546.032	579.671		89.24	104.762	103.387	71.305	85.109	87.9439	116.932	164.353	134.484	115.134	103.993	96.587	130.226	107.958	24.672
		544.84	511.419	546.312	521.226	558.167	589.373	582.069	551.984	550.054	561.809	598.018			96.159	95.395	63.597	96.867	77.4375	88.743	127.429	121.673	102.539	100.609	112.364	148.573
		563.109		516.725					555.139	567.322	559.085	576.781				113.664	61.974	67.28	71.781	108.722	139.928	132.624	105.694	117.877	109.64	127.336
				501.179							571.888							51.734							122.443

## Sheet: 200526_nocako_gip1_7
200526_nocako_gip1_7														Background corrected	200526_nocako_gip1_7
									679.069	555.774	510.787	533.273	545.306											228.9	105.605	60.618	83.104
									647.36	539.992	505.108	516.105	536.97											197.191	89.823	54.939	65.936	95.137
									696.078	544.196	495.844	509.013	517.249											245.909	94.027	45.675	58.844	86.801
									751.915	552.804	529.7	524.548	521.543											301.746	102.635	79.531	74.379	67.08
									735.897	532.018	534.333	552.177	528.381											285.728	81.849	84.164	102.008	71.374
									691.512	533.782	520.896	568.347	516.992											241.343	83.613	70.727	118.178	78.212
									714.087	538.673	515.925	575.371	533.434					104.866						263.918	88.504	65.756	125.202	66.823
544.488	544.567	509.949	555.035	517.242	529.577	502.018	542.153	626.495	659.519	508.327	540.708	553.988	532.377		94.319	94.3978	59.78	91.1654		79.408	51.8491	91.984	176.326	209.35	58.158	90.539	103.819	83.265	Average	Stdev
543.129	553.309	561.307	541.334	510.428	530.489	518.548	541.377	643.829	620.192	503.907	509.634	525.822	548.591		92.96	103.14	111.138	89.0606	67.073	80.32	68.3789	91.208	193.66	170.023	53.738	59.465	75.653	82.208	95.5733	40.1397
523.018	551.522	579.891	539.23	504.781	527.732	523.126	566.234	610.138	615.226	529.39	499.078	523.552	533.901		72.849	101.353	129.722	103.823	60.259	77.563	72.9571	116.065	159.969	165.057	79.221	48.909	73.383	98.422	97.1109	35.2726
524.906	552.1	539.204	553.992	506.842	563.615	524.352	550.943	575.657	624.09	552.602	516.343	539.399	544.132		74.737	101.931	89.035	92.6346	54.612	113.446	74.1834	100.774	125.488	173.921	102.433	66.174	89.23	83.732	95.8808	29.2621
517.059	533.961	540.123	542.804	504.457	549.553	517.466	557.842	589.739	584.406	518.593	518.725	509.335	529.934		66.89	83.7919	89.954	77.9312	56.673	99.384	67.2972	107.673	139.57	134.237	68.424	68.556	59.166	93.963	86.6793	26.1597
545.435	526.606	523.304	528.1	513.932	526.291	507.757	543.177	554.117	559.679	512.764	510.444	514.465	540.772		95.266	76.4374	73.135	81.7447	54.288	76.122	57.5884	93.008	103.948	109.51	62.595	60.275	64.296	79.765	77.7128	17.4385
520.927	539.065	521.085	531.914	511.329	510.512	530.408	543.43	555.003	555.575	515.372	508.848	528.377	518.844		70.758	88.8958	70.916	58.2362	63.763	60.343	80.239	93.261	104.834	105.406	65.203	58.679	78.208	90.603	77.8104	16.4806
539.858	537.346	548.562	508.405	531.854	510.357	513.074	548.181	558.853	544.875	498.164	533.556	524.157	533.527		89.689	87.1773	98.393	47.9971	61.16	60.188	62.9048	98.012	108.684	94.706	47.995	83.387	73.988	68.675	77.354	19.6375
514.295	529.529	558.902	498.166	554.344	520.794	520.167	530.7	597.235	564.197	502.923	537.824	557.396	559.324		64.126	79.3601	108.733	71.4625	81.685	70.625	69.9979	80.531	147.066	114.028	52.754	87.655	107.227	83.358	87.0435	24.5837
517.252	540.089	532.378	521.631	538.05	546.238	519.774	552.698	565.967	568.243	523.264	524.078	594.286	544.786		67.083	89.9198	82.209	53.9691	104.175	96.069	69.6046	102.529	115.798	118.074	73.095	73.909	144.117	109.155	92.8362	24.6142
506.607	572.604	510.523	504.138	534.806	506.06	542.705	512.599	552.206	569.435	533.41	531.045	564.345	542.411		56.438	122.435	60.354	80.0314	87.881	55.891	92.5357	62.43	102.037	119.266	83.241	80.876	114.176	94.617	86.5864	22.6412
504.06	547.39	530.234	530.2	524.083	530.663	523.211	506.55	562.235	577.637	503.672	518.507	533.62	537.233		53.891	97.2214	80.065	68.023	84.637	80.494	73.0415	56.381	112.066	127.468	53.503	68.338	83.451	92.242	80.773	21.524
499.122	544.272	546.594	518.192	510.122	532.535	506.86	514.07	557.234	554.19	534.067	518.577	537.798	542.865		48.953	94.103	96.425	74.7466	73.914	82.366	56.6911	63.901	107.065	104.021	83.898	68.408	87.629	87.064	80.6561	17.2459
514.593	543.351	523.908	524.916	533.114	518.781	522.512	496.261	557.971	543.045	538.593	539.536	556.054	542.814		64.424	93.1823	73.739	64.202	59.953	68.612	72.3427	46.092	107.802	92.876	88.424	89.367	105.885	92.696	79.9712	18.3424
545.854	521.433	511.484	514.371	522.642	512.53	521.864	500.142	569.611	551.881	518.044	542.319	537.888	548.481		95.685	71.2645	61.315	86.0994	82.945	62.361	71.6954	49.973	119.442	101.712	67.875	92.15	87.719	92.645	81.6344	18.6111
520.105	519.858	543.392	536.268	530.828	518.571	516.653	545.17	591.389	535.121	524.205	539.291	543.207	558.693		69.936	69.6889	93.223	78.0443	72.473	68.402	66.4843	95.001	141.22	84.952	74.036	89.122	93.038	98.312	85.2809	19.5944
513.291	550.067	513.318	528.213	524.302	504.026	510.782	530.146	571.928	546.615	524.129	531.52	565.073	555.429		63.122	99.8976	63.149	78.1633	80.659	53.857	60.6126	79.977	121.759	96.446	73.96	81.351	114.904	108.524	84.0273	21.2771
524.227	549.55	520.919	528.332	535.609	525.799	518.451	516.577	565.098	564.224	522.403	529.731	564.534	576.528		74.058	99.3812	70.75	76.8116	74.133	75.63	68.2817	66.408	114.929	114.055	72.234	79.562	114.365	105.26	86.1328	18.8414
523.454	541.953	524.908	526.981	520.109	547.303	513.121	538.079	567.009	573.744	564.939	522.199	566.176	589.449		73.285	91.7843	74.739	85.3773	85.44	97.134	62.9516	87.91	116.84	123.575	114.77	72.03	116.007	126.359	94.8716	21.1128
535.806	533.544	555.239	535.546	527.766	522.124	503.078	525.28	513.877	542.747	576.887	533.594	554.163	576.726		85.637	83.3753	105.07	71.5109	69.94	71.955	52.9086	75.111	63.708	92.578	126.718	83.425	103.994	139.28	87.5151	24.1543
512.252	545.752	576.364	521.68	533.218	524.449	527.317	546.653	520.311	523.773	580.744	527.927	542.169	582.408		62.083	95.5831	126.195	90.6477	77.597	74.28	77.1475	96.484	70.142	73.604	130.575	77.758	92	126.557	90.761	22.3966
516.189	535.766	525.037	540.817	531.724	534.846	505.45	544.546	530.785	527.21	582.549	518.267	557.342	564.894		66.02	85.5974	74.868	68.9106	83.049	84.677	55.2807	94.377	80.616	77.041	132.38	68.098	107.173	132.239	86.4519	23.2113
504.893	569.668	526.706	519.08	550.066	521.026	520.733	524.523	551.726	543.913	590.441	540.852	558.977	561.357		54.724	119.5	76.537	81.0037	81.555	70.857	70.5639	74.354	101.557	93.744	140.272	90.683	108.808	114.725	91.3488	23.2909
536.695	551.741	536.053	531.173	570.687	531.44	526.155	530.906	577.1	552.947	600.187	512.824	541.375	559.771		86.526	101.572	85.884	82.343	99.897	81.271	75.9858	80.737	126.931	102.778	150.018	62.655	91.206	111.188	95.6423	22.4631
546.173	563.886	536.974	532.512	629.428	536.564	534.734	556.042	585.667	579.096	586.791	549.059	575.874	556.232		96.004	113.717	86.805	107.414	120.518	86.395	84.5653	105.873	135.498	128.927	136.622	98.89	125.705	109.602	109.753	17.9158
552.17	583.036	550.864	557.583	626.622	518.612	503.091	559.951	624.903	608.463	565.115	549.166	595.777	571.268		102.001	132.867	100.695	123.514	179.259	68.443	52.9218	109.782	174.734	158.294	114.946	98.997	145.608	106.063	119.152	36.6029
546.072	597.398	612.26	573.683	649.069	568.006	525.199	593.061	645.751	632.534	536.514	558.869	575.14	603.585		95.903	147.229	162.091	114.275	176.453	117.837	75.0299	142.892	195.582	182.365	86.345	108.7	124.971	121.099	132.198	36.8674
566.341	571.76	598.742	564.444	677.297	608.019	529.952	588.389	645.797	677.557	548.094	569.743	635.796	652.073		116.172	121.591	148.573	126.023	198.9	157.85	79.7831	138.22	195.628	227.388	97.925	119.574	185.627	153.416	147.619	42.026
601.301	587.641	567.262	576.192	649.293	610.337	545.978	583.497	647.802	660.947	562.55	610.513	658.087	641.839		151.132	137.472	117.093	146.422	227.128	160.168	95.8087	133.328	197.633	210.778	112.381	160.344	207.918	201.904	161.394	41.3585
581.545	588.345	555.247	596.591	603.081	602.366	550.88	590.286	629.029	638.492	572	602.819	598.626	596.564		131.376	138.176	105.078	135.734	199.124	152.197	100.711	140.117	178.86	188.323	121.831	152.65	148.457	191.67	148.879	30.9795
571.363	587.102	562.983	585.903	587.031	595.272	535.123	577.536	621.464	604.76	586.586	593.32	567.576	591.451		121.194	136.933	112.814	90.2532	152.912	145.103	84.9539	127.367	171.295	154.591	136.417	143.151	117.407	146.395	131.485	24.3541
569.701	563.065	558.493	540.422	532.395	549.989	550.521	567.449	616.825	573.993	573.2	592.06	536.032	601.484		119.532	112.896	108.324	79.6047	136.862	99.82	100.352	117.28	166.656	123.824	123.031	141.891	85.863	141.282	118.373	23.4763
587.392	583.891	554	529.774	536.584	557.508	549.847	566.011	575.215	551.577	552.272	585.804	538.139	601.813		137.223	133.722	103.831	107.3	82.226	107.339	99.6776	115.842	125.046	101.408	102.103	135.635	87.97	151.315	113.617	20.1859
583.627	594.844	528.594	557.469	516.693	548.506	537.931	543.511	586.643	574.06	520.878	581.861	547.131	581.236		133.458	144.675	78.425	107.542	86.415	98.337	87.7624	93.342	136.474	123.891	70.709	131.692	96.962	151.644	110.095	26.3587
591.375	573.229	537.363	557.711	516.394	536.612	541.676	532.466	574.73	582.461	553.712	578.291	541.337	563.152		141.206	123.06	87.194	101.795	66.524	86.443	91.5068	82.297	124.561	132.292	103.543	128.122	91.168	131.067	106.484	23.1896
561	557.078	564.559	551.964	527.158	536.272	513.611	560.14	542.073	573.823	548.95	561.152	544.765	540.84		110.831	106.909	114.39	86.9649	66.225	86.103	63.4421	109.971	91.904	123.654	98.781	110.983	94.596	112.983	98.4098	18.0199
561.454	571.723	548.901	537.134	532.193	529.634	528.166	563.937	561.609	584.771	533.15	549.45	578.454	552.11		111.285	121.554	98.732	90.5008	76.989	79.465	77.9966	113.768	111.44	134.602	82.981	99.281	128.285	90.671	101.254	19.1995
580.483	571.951	542.754	540.67	536.316	511.721	533.85	530.956	551.476	587.079	539.253	539.958	583.847	572.291		130.314	121.782	92.585	109.96	82.024	61.552	83.6814	80.787	101.307	136.91	89.084	89.789	133.678	101.941	101.1	22.6901
555.497	579.269	565.703	560.129	544.072	520.353	529.984	536.986	548.305	572.75	541.408	546.194	578.726	528.802		105.328	129.1	115.534	110.603	86.147	70.184	79.8154	86.817	98.136	122.581	91.239	96.025	128.557	122.122	103.013	18.9629
557.69	543.323	555.244	560.772	527.706	548.723	517.039	560.299	543.362	593.461	537.993	566.669	570.812	550.957		107.521	93.1542	105.075	107.203	93.903	98.554	66.8696	110.13	93.193	143.292	87.824	116.5	120.643	78.633	101.607	18.8275
524.813	547.687	581.968	557.372	529.557	534.274	545.239	526.244	565.251	585.904	552.425	566.432	578.333	541.198		74.644	97.5178	131.799	125.704	77.537	84.105	95.0696	76.075	115.082	135.735	102.256	116.263	128.164	100.788	104.339	21.4463
518.099	560.536	590.707	575.873	550.589	537.202	562.754	526.209	546.561	580.917	566.285	559.859	558.402	535.303		67.93	110.367	140.538	115.148	79.388	87.033	112.585	76.04	96.392	130.748	116.116	109.69	108.233	91.029	102.945	20.8899
535.138	578.076	553.754	565.317	546.67	537.001	582.056	536.042	547.544	568.218	539.939	571.566	570.585	544.905		84.969	127.907	103.585	95.0761	100.42	86.832	131.887	85.873	97.375	118.049	89.77	121.397	120.416	85.134	103.478	17.0865
549.218	563.396	568.138	545.245	540.317	540.284	568.539	553.426	551.617	572.521	531.158	555.366	558.948	530.487		99.049	113.227	117.969	89.156	96.501	90.115	118.37	103.257	101.448	122.352	80.989	105.197	108.779	94.736	102.939	12.2423
529.283	540.44	559.757	539.325	525.638	575.029	562.879	579.852	537.157	565.647	534.125	564.342	551.476	562.585		79.114	90.2709	109.588	98.8577	90.148	124.86	112.71	129.683	86.988	115.478	83.956	114.173	101.307	80.318	101.247	16.6787
538.998	546.38	556.19	549.027	557.537	560.159	548.793	617.791	555.742	544.919	522.339	548.924	545.836	582.183		88.829	96.211	106.021	115.951	75.469	109.99	98.6242	167.622	105.573	94.75	72.17	98.755	95.667	112.416	102.718	22.5495
516.776	547.604	582.5	566.12	520.689	534.534	546.78	603.239	583.46	554.787	517.517	528.24	523.664	571.29		66.607	97.435	132.331	110.217	107.368	84.365	96.6111	153.07	133.291	104.618	67.348	78.071	73.495	132.014	102.631	27.323
546.639	559.823	557.86	560.386	528.61	541.439	530.988	604.817	557.28	552.728	502.78	548.459	531.168	557.047		96.47	109.654	107.691	132.922	70.52	91.27	80.8189	154.648	107.111	102.559	52.611	98.29	80.999	121.121	100.478	25.8069
564.009	557.252	570.85	583.091	548.632	506.61	521.038	621.459	538.587	543.729	517.074	569.773	555.9	563.115		113.84	107.083	120.681	136.463	78.441	56.441	70.8688	171.29	88.418	93.56	66.905	119.604	105.731	106.878	102.586	30.2982
536.589	544.473	555.99	586.632	531.076	517.813	519.756	626.694	517.65	532.202	527.447	582.898	570.422	540.438		86.42	94.3036	105.821	125.812	98.463	67.644	69.5874	176.525	67.481	82.033	77.278	132.729	120.253	112.946	101.235	30.7239
531.757	543.791	574.082	575.981	538.188	497.529	529.946	644.141	530.996	562.397	540.835	563.376	548.426	574.713		81.588	93.6216	123.913	119.811	80.907	47.36	79.777	193.972	80.827	112.228	90.666	113.207	98.257	90.269	100.457	33.504
515.625	563.952	569.623	569.98	498.496	516.449	545.51	614.01	540.71	524.916	536.862	567.954	556.146	594.286		65.456	113.783	119.454	90.2908	88.019	66.28	95.3414	163.841	90.541	74.747	86.693	117.785	105.977	124.544	100.197	26.446
540.19	563.875	573.698	540.46	496.711	494.792	535.495	606.502	548.621	500.552	523.793	556.44	565.119	583.044		90.021	113.706	123.529	94.5553	48.327	44.623	85.3261	156.333	98.452	50.383	73.624	106.271	114.95	144.117	96.0155	34.1298
540.172	575.68	576.632	544.724	525.911	513.928	524.559	615.168	548.714	539.236	525.052	576.462	563.277	579.832		90.003	125.511	126.463	106.799	46.542	63.759	74.39	164.999	98.545	89.067	74.883	126.293	113.108	132.875	102.374	31.8249
554.892	562.044	531.384	556.968	525.641	526.916	543.177	615.611	538.11	569.177	538.553	580.985	560.339	552.991		104.723	111.875	81.215	94.6704	75.742	76.747	93.0084	165.442	87.941	119.008	88.384	130.816	110.17	129.663	104.957	25.1699
542.233	538.804	537.99	544.839	498.49	556.082	541.712	586.6	567.707	584.698	585.88	581.395	553.133	577.987		92.064	88.6351	87.821		75.472	105.913	91.543	136.431	117.538	134.529	135.711	131.226	102.964	102.822
									598.96	555.258	568.341	571.141	629.024						48.321					148.791	105.089	118.172	120.972	127.818
									613.188	547.431	569.459	562.379	622.324											163.019	97.262	119.29	112.21	178.855
									621.324	551.351	560.542	573.435	623.536											171.155	101.182	110.373	123.266	172.155
									592.217	562.57	542.88	569.013	593.327											142.048	112.401	92.711	118.844	173.367
									628.388	563.556	522.535	554.758	550.729											178.219	113.387	72.366	104.589	143.158
									585.803	593.98	531.869	583.577	555.159											135.634	143.811	81.7	133.408	100.56
									622.445	578.948	539.307	563.953	564.035											172.276	128.779	89.138	113.784	104.99
																												113.866

## Sheet: 200526_nocako_gip1_6
200526_nocako_gip1_6														Background corrected	200526_nocako_gip1_6
	479.772	532.878	497.655	499.473	463.19	460.082	468.244	555.825	498.245	513.51	484.264	474.474	495.28			42.0222	95.1279		61.7232	25.4396	22.3316	30.494	118.075	60.495	75.7601	46.5135	36.7244	57.5304	Average	Stdev
479.409	486.663	525.455	484.551	477.978	463.62	474.506	470.899	544.557	516.472	510.869	498.262	473.455	486.618		41.6589	48.913	87.7051	59.905	40.2281	25.8704	36.7556	33.1491	106.807	78.7222	73.119	60.5118	35.7051	48.8685	55.5657	23.5284
483.131	470.683	540.702	469.665	481.993	461.489	473.953	466.549	496.329	513.371	517.251	493.471	478.685	474.61		45.3806	32.9329	102.952	46.801	44.2432	23.7393	36.203	28.7993	58.579	75.6208	79.5015	55.7215	40.9355	36.8599	50.5907	22.1402
477.729	483.091	556.216	465.88	501.123	468.616	488.397	467.237	482.158	497.693	502.992	473.916	467.699	484.379		39.9786	45.3412	118.466	31.915	63.3735	30.8657	50.6468	29.4869	44.4077	59.9428	65.2422	36.1656	29.9491	46.629	49.4579	23.3141
507.339	472.522	539.812	475.555	502.709	456.726	483.043	460.296	467.054	500.309	502.566	492.151	488.945	488.721		69.5891	34.7724	102.062	28.13	64.9586	18.9758	45.2925	22.5455	29.3043	62.5591	64.8159	54.4014	51.1954	50.9714	49.9695	22.5214
477.908	490.321	521.529	507.292	497.974	462.359	475.639	481.332	495.921	488.877	498.76	493.721	491.265	489.522		40.1584	52.5706	83.7791	37.805	60.2245	24.6093	37.889	43.5823	58.1707	51.1273	61.0098	55.9706	53.5154	51.7724	50.8703	14.0332
477.134	495.198	531.418	501.239	500.193	476.661	482.166	475.592	500.379	506.185	503.939	481.829	501.952	508.686		39.3844	57.4478	93.668	69.542	62.4433	38.9106	44.4164	37.8416	62.6293	68.4352	66.1886	44.0792	64.2023	70.9364	58.5804	15.9797
486.251	481.647	496.084	506.064	517.908	499.902	469.975	469.948	485.082	504.713	500.102	485.219	482.892	491.337		48.5011	43.8969	58.3341	63.489	80.1578	62.1523	32.225	32.1977	47.3315	66.9628	62.3524	47.469	45.1422	53.5869	53.1285	13.3999
480.948	478.047	490.413	511.677	516.9	512.876	487.2	476.363	517.113	483.423	496.731	502.197	475.006	506.377		43.1977	40.2973	52.6626	68.314	79.1497	75.126	49.4495	38.6135	79.3634	45.6735	58.981	64.4469	37.2559	68.6265	57.2255	15.2986
511.606	474.966	487.016	503.129	515.669	545.752	479.25	487.362	516.436	483.149	496.409	488.157	499.926	496.988		73.8557	37.2156	49.2664	73.927	77.9194	108.002	41.4999	49.6116	78.6862	45.3988	58.6593	50.4072	62.1763	59.2382	61.8474	19.0333
501.564	502.639	468.175	489.847	509.714	545.778	493.584	491.18	520.329	499.591	514.611	485.48	507.029	474.775		63.8141	64.8889	30.4249	65.379	71.9641	108.028	55.8344	53.4299	82.5788	61.8409	76.8613	47.7304	69.2795	37.0253	63.5056	19.2999
503.73	505.524	479.374	494.34	490.676	517.757	491.732	484.904	484.944	489.288	489.577	482.293	501.365	460.304		65.9804	67.7742	41.6241	52.097	52.9258	80.0068	53.9823	47.1539	47.1944	51.5385	51.8271	44.5435	63.6152	22.5543	53.0584	13.6715
499.708	494.477	496	505.148	489.853	511.138	477.576	462.699	487.72	478.274	500.856	510.296	468.875	473.813		61.9584	56.7267	58.2495	56.59	52.103	73.3879	39.8256	24.949	49.9698	40.524	63.1059	72.546	31.1254	36.0634	51.2232	14.8884
482.396	502.43	497.085	513.419	510.714	514.902	474.64	471.623	479.009	490.857	513.087	486.386	495.561	490.89		44.646	64.6805	59.3354	67.398	72.9636	77.1517	36.8904	33.8727	41.2591	53.1067	75.3372	48.6359	57.8109	53.1405	56.1592	14.1426
493.352	500.759	490.669	473.665	477.65	511.996	485.495	481.776	483.599	527.607	495.172	494.806	501.4	491.717		55.602	63.0086	52.9194	75.669	39.8998	74.2461	47.7455	44.0261	45.8491	89.8574	57.4217	57.0558	63.6497	53.9666	58.6369	13.7759
497.542	506.878	492.503	473.026	483.092	489.703	490.324	477.471	458.662	527.455	501.633	499.501	495.236	482.627		59.7916	69.1283	54.7527	35.915	45.3424	51.9532	52.5743	39.7208	20.9121	89.705	63.8828	61.7509	57.4856	44.8769	53.4137	16.392
488.817	500.553	499.994	496.473	515.672	487.498	499.091	464.315	476.733	517.332	491.033	498.689	500.745	477.233		51.0665	62.8035	62.2439	35.276	77.9218	49.7481	61.3409	26.5646	38.983	79.5822	53.2825	60.9394	62.9945	39.483	54.445	15.4896
478.571	518.532	493.499	504.575	488.748	508.441	493.082	464.248	480.038	514.396	478.356	501.127	488.401	507.55		40.8206	80.7817	55.7488	58.723	50.9977	70.6911	55.3315	26.4981	42.2882	76.6463	40.6063	63.3765	50.6514	69.8001	55.9258	15.4131
480.028	507.434	474.619	493.47	498.423	507.426	477.847	474.055	490.861	496.251	495.234	490.658	483.703	503.857		42.2784	69.6838	36.8691	66.825	60.6732	69.6759	40.0973	36.3051	53.1106	58.5006	57.4844	52.9077	45.9534	66.1067	54.0337	12.0373
484.804	483.228	493.253	508.964	492.753	519.525	490.114	489.117	533.229	507.473	485.452	509.113	496.251	513.923		47.054	45.4782	55.5034	55.72	55.003	81.7747	52.3636	51.3667	95.4791	69.7231	47.702	71.3634	58.5007	76.1725	61.6575	14.9563
488.288	482.888	489.589	499.274	478.127	521.776	493.724	489.698	507.38	485.131	490.145	481.467	517.345	496.19		50.538	45.1382	51.8385	71.214	40.3775	84.0259	55.974	51.9478	69.6305	47.3806	52.3953	43.7175	79.5947	58.4405	57.3009	13.6027
473.945	481.129	474.864	476.402	475.933	503.767	496.368	469.922	530.604	501.116	498.076	481.663	492.606	479.811		36.1947	43.379	37.114	61.524	38.183	66.0166	58.6184	32.172	92.8539	63.3659	60.3263	43.9129	54.8557	42.0607	52.1841	16.4087
486.413	494.341	478.006	497.62	464.123	495.901	507.742	467.174	529.829	500.523	503.357	473.813	470.808	483.668		48.6626	56.5914	40.2557	38.652	26.3731	58.1508	69.9922	29.4238	92.0793	62.7728	65.6066	36.0635	33.0582	45.9185	50.2572	18.3786
491.76	489.502	500.55	487.925	488.012	484.574	507.865	482.739	505.716	529.692	499.8	487.496	476.016	483.712		54.0097	51.7518	62.7997	59.87	50.2616	46.8239	70.1151	44.9886	67.966	91.942	62.0499	49.7463	38.2659	45.9615	56.8966	13.6877
501.492	497.868	510.93	482.002	481.602	492.595	508.929	494.992	511.998	506.686	500.957	489.502	491.792	488.071		63.7417	60.1184	73.1797	50.175	43.8522	54.8451	71.1792	57.2421	74.2478	68.9363	63.2072	51.7523	54.0423	50.3206	59.7743	9.58281
498.903	495.539	488.75	476.939	482.578	489.234	516.708	494.225	507.275	500.831	513.139	489.407	506.535	459.722		61.1526	57.7892	51	44.252	44.8282	51.4842	78.9576	56.475	69.5248	63.0811	75.389	51.657	68.7849	21.9719	56.882	14.6854
492.928	492.121	483.632	488.114	488.272	467.154	510.843	471.692	531.019	505.773	509.608	506.998	489.706	482.907		55.1781	54.3708	45.8818	39.189	50.522	29.4044	73.0926	33.9425	93.269	68.0233	71.8581	69.2478	51.9563	45.1573	55.7924	17.5372
480.363	492.195	485.881	477.931	480.934	495.38	504.687	493.472	516.269	494.772	501.554	493.055	499.889	478.285		42.6128	54.4448	48.1312	50.364	43.1844	57.6305	66.937	55.7217	78.5191	57.0215	63.8044	55.3053	62.1388	40.5352	55.4536	10.3928
500.505	514.368	485.412	480	477.524	473.139	498.548	498.272	509.759	507.215	508.793	505.701	511.086	481.403		62.7546	76.618	47.6617	40.181	39.7741	35.3885	60.7975	60.5221	72.0085	69.4648	71.043	67.9508	73.3361	43.6532	58.6538	14.3665
494.841	512.462	491.841	486.51	477.383	494.262	507.428	497.348	496.771	504.73	509.777	496.269	507.002	487.784		57.0911	74.7122	54.0913	42.25	39.6331	56.512	69.6777	59.5982	59.0214	66.9796	72.0268	58.5194	69.2515	50.0344	59.2428	10.6304
496.833	494.744	482.059	491.163	483.993	482.934	505.851	496.911	498.349	478.729	504.71	507.257	475.872	495.523		59.0831	56.9941	44.3086	48.76	46.2434	45.1844	68.1011	59.1609	60.5993	40.9795	66.9599	69.5068	38.1219	57.7728	54.4126	10.396
499.786	484.476	475.149	505.653	498.448	484.908	515.635	496.178	505.919	473.777	508.695	506.046	481.683	472.083		62.0359	46.7263	37.3994	53.413	60.6977	47.1584	77.8846	58.4285	68.1687	36.0268	70.9454	68.2955	43.9327	34.3329	54.6747	14.0664
511.257	492.608	479.863	499.74	515.171	478.834	477.385	499.058	494.666	485.679	527.909	491.652	501.622	460.705		73.5074	54.8579	42.113	67.903	77.4208	41.0844	39.6346	61.3081	56.9162	47.9287	90.1591	53.9019	63.8723	22.955	56.683	17.5506
503.679	519.271	483.772	499.475	479.263	472.69	497.287	486.033	492.675	495.185	502.635	498.303	493.011	462.701		65.929	81.5211	46.0224	61.99	41.5134	34.9396	59.5372	48.2826	54.9248	57.4348	64.8849	60.5533	55.2612	24.9511	54.1247	14.2209
498.594	517.836	471.116	502.932	469.725	501.752	522.98	483.838	512.245	490.753	511.991	500.51	473.887	478.154		60.8445	80.0858	33.3657	61.725	31.9749	64.0022	85.2296	46.0876	74.4951	53.0028	74.2411	62.7598	36.1365	40.4044	57.4539	17.7162
519.479	480.751	495.294	499.674	498.098	501.079	504.901	503.481	496.841	501.558	505.962	507.417	487.348	489.489		81.729	43.0006	57.5444	65.182	60.3481	63.3292	67.1507	65.7315	59.0907	63.8076	68.2123	69.6672	49.5979	51.7387	61.8664	9.58004
537.357	500.484	485.908	487.653	488.099	509.061	469.466	498.369	510.333	499.346	500.109	489.056	502.273	497.232		99.6066	62.7337	48.1578	61.924	50.3495	71.3106	31.716	60.6189	72.5826	61.5963	62.3586	51.3059	64.5226	59.4818	61.3046	15.1415
523.362	507.354	499.149	500.302	494.055	490.59	497.858	497.583	515.416	484.849	489.443	500.93	495.757	498.643		85.6119	69.6038	61.3991	49.903	56.3054	52.8401	60.1078	59.8329	77.6664	47.0991	51.6927	63.1799	58.0069	60.8929	61.0101	10.6164
534.364	495.215	499.938	493.16	499.554	528.324	494.446	501.082	506.193	506.054	484.537	490.992	486.96	486.975		96.6141	57.4646	62.1881	62.552	61.8041	90.5743	56.6956	63.332	68.4426	68.3039	46.7874	53.2416	49.2104	49.2251	63.3168	14.5638
507.887	501.437	486.359	513.737	493.335	516.692	496.004	502.335	497.534	504.345	512.872	510.26	492.393	498.154		70.137	63.6867	48.6088	55.41	55.5853	78.942	58.2537	64.585	59.7839	66.5948	75.1225	72.5096	54.6433	60.4042	63.1619	8.71403
490.55	490.962	507.204	530.829	505.942	507.557	490.793	495.488	497.728	513.546	519.073	480.423	479.621	479.304		52.7995	53.2116	69.4539	75.987	68.192	69.8071	53.0434	57.7376	59.9783	75.796	81.3226	42.6725	41.8712	41.5537	60.2447	13.394
497.18	496.278	506.096	507.695	502.243	526.102	493.557	519.414	518.24	501.073	511.743	481.043	478.683	474.711		59.4295	58.5284	68.346	93.079	64.4932	88.3516	55.8067	81.6638	80.49	63.323	73.9933	43.2932	40.9332	36.9611	64.9066	17.4099
481.969	495.105	516.954	532.373	484.349	492.576	511.346	524.676	506.029	498.074	497.152	520.143	490.26	506.038		44.2191	57.3552	79.2039	69.945	46.5988	54.8259	73.5961	86.9263	68.2795	60.3236	59.4024	82.3926	52.51	68.2882	64.5619	13.1379
481.507	509.371	512.351	565.938	476.313	501.077	512.233	490.051	505.975	488.773	480.862	503.534	487.865	496.203		43.7572	71.6208	74.601	94.623	38.5627	63.3268	74.4827	52.3013	68.2252	51.0233	43.1119	65.7836	50.1152	58.4529	60.7134	15.4679
499.505	531.271	500.26	541.095	514.027	491.922	520.842	505.122	491.708	506.244	496.648	486.923	481.551	491.056		61.7545	93.5206	62.5095	128.188	76.2769	54.1723	83.092	67.3721	53.9576	68.4943	58.8982	49.1735	43.801	53.3061	68.1798	21.9557
505.024	518.532	523.752	508.756	516.541	507.519	498.813	524.676	474.479	552.174	490.49	484.753	477.75	503.607		67.2738	80.782	86.0023	103.345	78.7913	69.769	61.0635	86.9262	36.7292	114.424	52.7397	47.0029	40.0001	65.8574	70.7647	22.7892
491.49	532.975	503.31	499.26	500.646	508.954	527.732	498.379	474.135	554.656	502.805	488.695	494.281	499.205		53.7397	95.2247	65.5597	71.006	62.8964	71.2038	89.9822	60.6292	36.3846	116.906	65.0545	50.9447	56.5308	61.4546	68.3941	20.3743
540.515	536.439	502.825	501.645	493.421	510.331	503.336	512.151	496.155	540.588	512.542	503.905	483.567	500.739		102.765	98.6895	65.0745	61.51	55.6709	72.5813	65.5855	74.4011	58.4048	102.838	74.7919	66.1546	45.817	62.9893	71.9481	17.7052
505.837	539.569	517.494	505.77	517.043	513.082	487.511	520.669	496.683	522.698	495.739	505.948	503.818	482.081		68.0872	101.819	79.7443	63.895	79.2931	75.3317	49.7613	82.9188	58.9334	84.9485	57.9891	68.1977	66.0677	44.3313	70.0942	15.2096
500.026	527.92	498.497	507.613	493.057	520.929	491.14	505.537	495.451	511.04	508.184	487.386	479.708	487.339		62.2762	90.1705	60.7467	68.02	55.3066	83.1793	53.3904	67.787	57.7012	73.2899	70.4341	49.6358	41.9577	49.5888	63.106	13.4193
531.46	518.153	515.643	487.039	516.991	506.361	497.914	490.389	495.325	523.609	507.861	501.645	477.978	501.632		93.7097	80.4034	77.8929	69.863	79.2414	68.6106	60.1637	52.6388	57.5747	85.8593	70.1113	63.895	40.2281	63.8821	68.8624	14.0523
522.001	516.285	509.823	482.653	522.882	532.822	483.237	492.467	479.159	530.553	508.728	522.087	482.709	516.857		84.2507	78.5353	72.0733	49.289	85.1319	95.0715	45.4872	54.7167	41.4085	92.8026	70.9778	84.3368	44.9595	79.1071	69.8677	18.9226
510.53	513.965	485.08	492.27	512.96	534.745	518.425	504.469	488.866	505.769	541.903	505.947	474.587	533.44		72.7802	76.2149	47.33	44.903	75.2103	96.9952	80.6746	66.7185	51.1163	68.019	104.153	68.1972	36.8365	95.6903	70.3456	20.3036
507.284	497.289	514.848	519.347	524.685	507.287	519.678	517.804	519.714	528.738	523.211	503.705	510.536	531.557		69.5343	59.5386	77.0981	54.52	86.9347	69.5374	81.9275	80.0545	81.9638	90.9879	85.4608	65.9549	72.7863	93.8071	76.4361	11.6476
514.361	498.395	536.162	509.345	536.561	528.79	510.022	506.315	519.979	507.797	525.799	509.381	502.712	517.851		76.6107	60.6447	98.4123	81.597	98.8113	91.0403	72.2721	68.565	82.2288	70.0467	88.0493	71.6306	64.9622	80.1011	78.9266	11.906
544.844	505.781	532.199	488.33	526.226	518.952	491.15	506.435	533.342	504.168	515.846	523.311	516.163	493.549		107.094	68.0313	94.449	71.595	88.476	81.2023	53.4004	68.6852	95.5919	66.4183	78.0956	85.561	78.4129	55.7987	78.058	15.3502
519.222	503.799	519.834	494.065	524.413	500.355	486.756	510.632	530.559	495.792	518.743	530.948	507.246	485.295		81.4719	66.0493	82.084	50.58	86.6632	62.6051	49.0058	72.8819	92.8095	58.0423	80.9926	93.1977	69.4962	47.545	70.9589	15.8493
501.076	519.982	535.074	512.593	501.155	521.576	490.585	517.811	519.661	504.072	530.911	518.401	515.054	483.615		63.3261	82.2316	97.3241	56.315	63.4053	83.8255	52.8354	80.0609	81.9113	66.3217	93.1613	80.6511	77.3045	45.8655	73.1814	15.3371
490.145	492.168	539.702	510.634	515.101	513.478	514.581	523.048	497.385	501.25	516.86	525.86	505.403	515.211		52.3948	54.4176	101.952	74.843	77.3508	75.728	76.831	85.2975	59.6355	63.5005	79.1096	88.1097	67.6534	77.4611	73.8775	13.5191
502.407	490.588	552.13	498.994	516.6	512.276	506.249	507.785	503.639	501.997	533.685	519.632	509.291	511.238		64.657	52.8384	114.38	72.884	78.8503	74.5262	68.4988	70.0353	65.8887	64.2472	95.935	81.8823	71.5415	73.4885	74.9752	15.0227
499.501	492.105	541.962	501.661	497.445	496.803	509.219	515.462	503.038	496.353	512.468	524.899	502.478	501.909		61.7513	54.3546	104.212	61.244	59.6949	59.0525	71.4685	77.7117	65.2879	58.6028	74.7176	87.1487	64.7279	64.1591	68.8667	13.4735
486.985	536.204	533.294	501.75	494.627	506.095	499.388	505.807	526.445	499.469	525.507	531.679	505.779	517.279		49.2348	98.4539	95.544	63.911	56.8768	68.3451	61.6382	68.0569	88.6948	61.7192	87.7574	93.9288	68.0291	79.529	74.4085	15.9509
506.577	525.922	524.811	519.967	490.961	503.896	504.943	483.242	549.051	496.795	515.036	534.506	521.06	526.975		68.8272	88.1722	87.0612	64	53.2113	66.1455	67.1933	45.4916	111.301	59.0452	77.2857	96.756	83.3104	89.2252	75.5019	18.1483
510.067	522.205	516.489	506.98	537.94	520.643	492.019	509.377	540.149	526.83	522.716	508.358	494.981	501.973		72.3165	84.4553	78.7386	82.217	100.19	82.8926	54.2695	71.6271	102.399	89.0795	84.9655	70.6077	57.2305	64.2225	78.2294	14.2884
484.852	511.817	517.026	476.703	520.567	511.154	509.409	517.791	535.989	493.651	530.305	514.733	512.842	495.698		47.1021	74.0671	79.2756	69.23	82.8173	73.4036	71.6594	80.0411	98.2388	55.9008	92.5551	76.9831	75.0919	57.9478	73.8796	13.647
498.374	500.796	515.05	498.326	516.557	519.645	493.797	508.43	541.582	503.185	531.175	497.618	524.397	526.876		60.6243	63.0465	77.3001	38.953	78.8071	81.8954	56.0468	70.6796	103.832	65.435	93.425	59.8675	86.6468	89.1264	73.2632	17.2724
511.466	501.512	507.847	497.712	514.623	496.915	522.072	491.374	545.329	528.96	511.096	521.576	527.02	530.256		73.7164	63.7621	70.0968	60.576	76.8726	59.1653	84.3217	53.6243	107.579	91.2103	73.3464	83.8257	89.2699	92.5063	77.1338	15.2145
511.175	496.956	508.816	537.585	516.199	520.214	534.274	491.63	534.495	514.507	491.601	524.918	516.123	509.737		73.425	59.2062	71.0663	59.962	78.4489	82.4644	96.5245	53.8795	96.7452	76.7573	53.8515	87.1683	78.3734	71.9874	74.2757	14.019
487.01	498.758	499.702	515.729	506.389	530.467	557.46	503.943	519.454	507.093	472.445	513.866	502.076	522.971		49.26	61.0083	61.9518	99.835	68.6395	92.7168	119.71	66.193	81.7036	69.3429	34.6945	76.1158	64.3257	85.2214	73.6227	21.4311
497.618	488.074	491.798	496.167	491.22	531.184	531.152	515.292	513.6	490.581	496.697	507.401	512.088	516.622		59.8677	50.3243	54.0485	77.979	53.4704	93.4341	93.4022	77.5422	75.8498	52.8311	58.9473	69.6514	74.3385	78.8724	69.3256	14.6164
510.549	494.258	496.244	492.593	492.905	538.377	521.665	501.413	498.47	509.563	528.977	538.373	545.721	514.889		72.7993	56.5082	58.4937	58.417	55.1553	100.627	83.9153	63.6634	60.7196	71.8127	91.2274	100.623	107.971	77.1388	75.6479	18.3397
486.142	469.961	508.653	508.873	502.741	544.118	532.717	501.781	512.577	511.381	511.591	519.817	558.587	505.821		48.3917	32.2111	70.9031	54.843	64.9908	106.368	94.967	64.0315	74.8267	73.6312	73.841	82.0673	120.837	68.0714	73.5701	22.7676
490.131	502.353	510.927	509.816	493.592	520.963	513.474	529.725	505.319	519.888	495.877	506.737	545.944	492.471		52.3806	64.6025	73.1767	71.123	55.842	83.2126	75.7236	91.9751	67.5691	82.1384	58.1275	68.9874	108.194	54.7208	71.9838	15.6254
473.704	491.754	520.876	487.265	487.024	535.607	535.131	523.149	510.89	529.966	509.507	528.1	542.836	534.801		35.9541	54.0043	83.1262	72.066	49.2741	97.8574	97.3812	85.399	73.1396	92.2157	71.7571	90.3504	105.086	97.0508	78.9044	20.6758
527.306	517.533	523.037	490.71	510.963	544.314	512.511	515.569	528.21	523.994	528.884	508.337	503.864	554.466		89.5563	79.783	85.2866	49.515	73.2127	106.564	74.7615	77.8194	90.4601	86.2435	91.1337	70.5865	66.114	116.716	82.6966	16.7162
511.356	500.444	533.371	501.101	510.667	541.202	510.001	496.17	491.585	515.119	533.289	517.47	514.528	536.264		73.606	62.6939	95.6206	52.96	72.9167	103.452	72.2514	58.4199	53.8349	77.3686	95.5394	79.7203	76.778	98.5137	76.6911	16.5817
475.84	508.101	496.338	500.375	529.28	522.019	537.683	487.743	486.931	520.579	506.683	516.199	517.719	554.398		38.0897	70.3508	58.5881	63.351	91.5298	84.2695	99.9334	49.993	49.1809	82.8289	68.9328	78.4494	79.9693	116.648	73.7225	21.3186
502.987	529.15	489.53	510.869	517.649	519.803	522.327	493.791	500.423	524.886	518.932	510.183	512.766	532.846		65.2366	91.4005	51.7797	62.625	79.8992	82.0535	84.5768	56.0406	62.673	87.1362	81.1816	72.4327	75.0159	95.0963	74.7963	13.3845
511.297	514.621	478.763	515.847	507.539	502.494	519.477	524.572	527.969	507.08	503.515	537.451	526.587	526.284		73.547	76.871	41.0129	73.119	69.7894	64.744	81.7267	86.8221	90.2186	69.33	65.765	99.7009	88.8371	88.5338	76.4298	14.6414
485.174	496.078	495.171	505.11	510.651	510.505	527.271	538.818	522.717	528.15	493.63	547.508	520.239	521.51		47.4237	58.3281	57.4215	78.097	72.9014	72.7548	89.5208	101.068	84.9669	90.4005	55.8799	109.758	82.4888	83.7597	77.4834	18.0031
491.223	495.777	528.255	479.549	478.301	520.353	522.576	539.172	509.659	531.532	508.004	528.174	521.562	535.322		53.473	58.0273	90.5052	67.36	40.5507	82.6028	84.8256	101.422	71.9087	93.7821	70.2543	90.4242	83.8123	97.5718	77.6086	17.9832
489.486	486.421	529.268	497.366	486.746	540.686	512.179	535.291	501.82	528.609	530.259	499.55	485.438	510.236		51.736	48.6709	91.5175	41.799	48.9957	102.936	74.4294	97.5407	64.0698	90.8594	92.509	61.7996	47.6879	72.4863	70.5027	21.2956
482.394	488.373	499.241	497.509	514.106	525.801	546.72	556.779	511.2	536.265	519.304	502.654	491.207	504.981		44.6435	50.623	61.4915	59.616	76.3562	88.0513	108.97	119.029	73.4503	98.5146	81.5543	64.9037	53.4568	67.2305	74.8494	22.2296
471.299	496.829	494.349	505.125	521.355	519.983	533.502	556.077	525.652	548.885	495.941	494.797	518.92	510.748		33.5488	59.0791	56.5987	59.759	83.605	82.2333	95.7521	118.327	87.9019	111.135	58.1914	57.0472	81.1705	72.9983	75.5248	23.3568
503.02	491.214	493.513		496.46	517.841	513.422	518.523	520.137	523.575	493.039	513.847	515.583	523.2		65.2702	53.4636	55.7626	67.375	58.7102	80.0914	75.6718	80.7728	82.3871	85.8248	55.2888	76.0972	77.8335	85.4499	71.4285	11.8058
509.579	492.615			507.454		522.548	516.551		514.342			531.698			71.8293	54.8647			69.7045		84.7979	78.8005		76.5918			93.9482

[truncated: 5 more sheets: 200526_nocako_gip1_4, 200526_nocako_gip1_5, nocako_average, gip1_average, together]
