# Supplementary material for: Epidermal PAR-6 and PKC-3 are essential for larval development of C. elegans and organize non-centrosomal microtubules
Source: eLife journal article supplement (doi:10.7554/elife.62067), 2020-12-10
Supplement: fig6-data1 [file 201105_pkc3aid_noca1degfp.xlsx]

## Sheet: Auxin
201105_pkc3aid_noca1degfp_A_1	201105_pkc3aid_noca1degfp_A_2	201105_pkc3aid_noca1degfp_A_3	201105_pkc3aid_noca1degfp_A_4	201105_pkc3aid_noca1degfp_A_5	201105_pkc3aid_noca1degfp_A_6	201105_pkc3aid_noca1degfp_A_7	201105_pkc3aid_noca1degfp_A_8	201105_pkc3aid_noca1degfp_A_9	201105_pkc3aid_noca1degfp_A_10		201105_pkc3aid_noca1degfp_A_1	201105_pkc3aid_noca1degfp_A_2	201105_pkc3aid_noca1degfp_A_3	201105_pkc3aid_noca1degfp_A_4	201105_pkc3aid_noca1degfp_A_5	201105_pkc3aid_noca1degfp_A_6	201105_pkc3aid_noca1degfp_A_7	201105_pkc3aid_noca1degfp_A_8	201105_pkc3aid_noca1degfp_A_9	201105_pkc3aid_noca1degfp_A_10
544.237	532.205	469.202	573.183	591.94	634.57	562.721	582.028	596.161	716.173											60.389
546.006	559.068	463.143	562.915	603.047	684.522	529.466	576.522	624.793	603.318											-52.466					1	561.89
534.6	561.42	445.727	531.299	621.81	643.827	523.562	610.855	627.228	574.543											-81.241					2	542.935
536.148	566.614	483.185	554.503	581.456	661.359	541.672	605.842	614.605	596.509				7.304		16.867		21.554			-59.275					3	496.301
546.583	556.044	502.958	569.852	616.284	691.32	547.515	565.099	571.533	601.666				20.21		-23.487		-11.701			-54.118					4	601.689
536.819	573.311	499.857	570.732	614.646	710.752	575.383	566.288	611.035	632.749			30.376	7.683		11.341		-17.605			-23.035					5	604.943
599.174	577.033	542.293	553.497	614.233	659.008	575.378	550.894	602.597	604.943			34.098	-4.648		9.703	-34.143	0.505			-50.841					6	668.713
564.397	564.832	493.593	592.486	648.686	706.939	570.544	598.139	677.569	637.25			21.897	2.966		9.29	15.809	6.348	-30.167		-18.534					7	541.167
599.687	566.29	491.805	539.77	625.591	657.167	552.972	639.463	668.908	616.636			23.355	7.205		43.743	-24.886	34.216	-35.673		-39.148					8	612.195
555.003	588.829	486.133	581.599	601.342	727.965	601.869	651.924	624.611	583.072		-17.653	45.894	-29.666		20.648	-7.354	34.211	-1.34		-72.712					9	655.961
606.391	635.67	503.605	561.161	631.328	674.242	604.101	635.93	618.684	674.351		-15.884	92.735	19.331	-28.506	-3.601	22.607	29.377	-6.353		18.567					10	655.784
531.107	650.67	516.511	575.92	615.745	681.607	588.277	650.547	604.897	649.204		-27.29	107.735	17.552	-38.774	26.385	42.039	11.805	-47.096	-59.8	-6.58
561.491	596.132	503.984	551.44	584.684	653.362	561.148	652.47	627.368	627.674		-25.742	53.197	-4.837	-70.39	10.802	-9.705	60.702	-45.907	-31.168	-28.11		-9.1158	41.3715
557.142	559.878	491.653	601.247	599.224	642.745	593.519	652.877	657.444	596.988		-15.307	16.943	-18.212	-47.186	-20.259	38.226	62.934	-61.301	-28.733	-58.796		-13.1691	41.1205
557.773	529.85	499.267	514.567	626.982	679.141	519.699	668.49	620.456	608.411		-25.071	-13.085	9.593	-31.837	-5.719	-11.546	47.11	-14.056	-41.356	-47.373		-13.334	27.2129
573.025	528.398	503.506	624.013	606.382	717.901	560.196	599.4	628.178	617.548		37.284	-14.537	26.796	-30.957	22.039	59.252	19.981	27.268	-84.428	-38.236		2.4462	43.394
578.634	526.804	466.635	555.43	636.067	685.984	568.891	591.339	640.597	569.735		2.507	-16.131	17.29	-48.192	1.439	5.529	52.352	39.729	-44.926	-86.049		-7.6452	42.2663
565.874	532.652	515.632	581.976	630.911	724.757	564.789	601.264	647.688	663.199		37.797	-10.283	-16.316	-9.203	31.124	12.894	-21.468	23.735	-53.364	7.415		0.2331	27.7821
615.743	557.307	513.853	560.443	603.284	741.616	588.006	603.097	578.094	645.353		-6.887	14.372	-18.809	-61.919	25.968	-15.351	19.029	38.352	21.608	-10.431		0.5932	29.3577
584.099	571.363	491.464	586.458	599.627	686.813	544.589	612.283	607.996	625.844		44.501	28.428	-5.663	-20.09	-1.659	-25.968	27.724	40.275	12.947	-29.94		7.0555	27.6047
554.682	600.472	478.089	563.549	553.673	699.919	554.254	621.884	605.113	644.67		-30.783	57.537	20.866	-40.528	-5.316	10.428	23.622	40.682	-31.35	-11.114		3.4044	32.7897
567.574	612.717	505.894	576.804	564.479	720.326	579.977	610.094	624.868	635.88		-0.399	69.782	13.51	-25.769	-51.27	49.188	46.839	56.295	-37.277	-19.904		10.0995	43.3245
558.712	606.26	523.097	585.35	582.906	689.695	543.885	595.533	600.084	649.734		-4.748	63.325	11.462	-50.249	-40.464	17.271	3.422	-12.795	-51.064	-6.05		-6.989	34.8898
557.86	569.284	513.591	703.354	658.478	658.781	568.72	578.907	617.332	644.629		-4.117	26.349	7.773	-0.442	-22.037	56.044	13.087	-20.856	-28.593	-11.155		1.6053	25.649
577.778	583.499	479.985	654.762	633.087	669.728	518.545	570.582	650.696	647.664		11.135	40.564	-12.816	-87.122	53.535	72.903	38.81	-10.931	1.483	-8.12		9.9441	45.2275
607.853	623.729	477.492	581.866	649.677	661.543	541.549	583.067	643.607	676.813		16.744	80.794	7.774	22.324	28.144	18.1	2.718	-9.098	-35.505	21.029		15.3024	29.6982
619.451	579.839	490.638	630.814	617.55	697.405	570.244	621.586	632.645	668.087		3.984	36.904	-0.554	-46.259	44.734	31.206	27.553	0.088	-27.783	12.303		8.2176	28.8676
628.796	545.106	517.167	629.812	599.455	690.638	563.497	631.809	657.429	635.701		53.853	2.171	43.661	-19.713	12.607	51.613	-22.622	9.689	-15.364	-20.083		9.5812	30.4587
549.322	536.277	509.811	701.919	613.531	694.981	571.499	600.504	652.179	651.376		22.209	-6.658	41.543	-41.246	-5.488	20.982	0.382	-2.101	-8.273	-4.408		1.6942	22.3575
559.271	573.384	507.763	650.762	629.933	683.416	543.521	659.547	658.959	643.192		-7.208	30.449	26.234	-15.231	8.588	-9.932	29.077	-16.662	-77.867	-12.592		-4.5144	31.9945
567.889	600.152	504.074	678.114	622.854	663.258	613.275	702.183	655.597	666.101		5.684	57.217	-2.513	-38.14	24.99	1.015	22.33	-33.288	-47.965	10.317		-0.0353	32.3288
598.066	547.683	483.485	748.529	611.687	655.69	563.74	632.153	654.344	689.764		-3.178	4.748	30.356	-24.885	17.911	-7.17	30.332	-41.613	-50.848	33.98		-1.0367	30.4169
626.61	572.16	504.075	693.712	618.988	689.523	566.756	617.209	629.971	659.677		-4.03	29.225	43.207	-16.339	6.744	28.692	2.354	-29.128	-31.093	3.893		3.3525	24.9363
574.035	562.315	495.747	756.494	645.063	682.081	589.422	653.877	651.73	656.392		15.888	19.38	61.47	101.665	14.045	21.925	72.108	9.391	-55.877	0.608		26.0603	43.5115
596.587	584.431	539.962	700.922	615.865	678.66	572.192	741.024	678.226	625.588		45.963	41.496	11.694	53.073	40.12	26.268	22.573	19.614	-38.629	-30.196		19.1976	31.092
633.346	559.85	537.844	624.526	620.969	725.393	598.629	805.097	713.618	626.727		57.561	16.915	-29.619	-19.823	10.922	14.703	25.589	-11.691	-5.265	-29.057		3.0235	27.4412
628.799	575.994	522.535	614.662	692.21	858.629	577.909	730.111	689.004	651.696		66.906	33.059	-44.528	29.125	16.026	-5.455	48.255	47.352	-12.354	-4.088		17.4298	33.9755
565.397	614.006	493.788	559.959	682.941	838.324	623.559	705.237	619.601	726.846		-12.568	71.071	-8.743	28.123	87.267	-13.023	31.025	89.988	-23.316	71.062		32.0886	44.9921
560.263	637.442	526.657	583.681	615.18	817.79	661.843	746.202	648.888	789.274		-2.619	94.507	42.793	100.23	77.998	20.81	57.462	19.958	1.468	133.49		54.6097	45.9858
576.54	563.691	539.508	574.212	632.132	752.583	639.278	657.281	689.596	806.873		5.999	20.756	1.005	49.073	10.237	13.368	36.742	5.014	-3.782	151.089		28.9501	45.9416
558.113	572.369	557.771	479.761	613.03	830.677	617.877	712.64	677.087	931.133		36.176	29.434	-11.188	76.425	27.189	9.947	82.392	41.682	2.998	275.349		57.0404	82.1888
599.145	600.568	507.995	509.161	655.481	775.455	621.143	682.479	749.234	1005.12		64.72	57.633	-4.939	146.84	8.087	56.68	120.676	128.829	-0.364	349.341		92.7503	105.17
634.232	584.813	466.682	579.457	634.558	770.633	625.194	673.287	711.792	1013.33		12.145	41.878	14.473	92.023	50.538	189.916	98.111	192.902	-1.617	357.542		104.791	112.578
614.912	613.293	451.773	579.592	665.505	761.142	633.937	633.202	668.618	1044.24		34.697	70.358	16.764	154.805	29.615	169.611	76.71	117.916	-25.99	388.452		103.294	117.713
631.876	649.503	487.558	502.824	717.846	735.608	639.828	714.891	709.408	1059.95		71.456	106.568	15.833	99.233	60.562	149.077	79.976	93.042	-4.231	404.171		107.569	113.121
607.952	648.018	539.094	506.178	756.027	697.656	650.019	640.868	645.077	976.566		66.909	105.083	43.737	22.837	112.903	83.87	84.027	134.007	22.265	320.782		99.642	86.1942
599.209	629.049	497.306	569.313	754.397	695.179	624.122	621.973	696.263	990.98		3.507	86.114	33.235	12.973	151.084	161.964	92.77	45.086	57.657	335.196		97.9586	98.9502
651.121	610.512	485.113	522.971	701.174	739.456	593.524	605.684	733.548	901.302		-1.627	67.577	-0.335	-41.73	149.454	106.742	98.661	100.445	33.043	245.518		75.7748	84.2068
636.941	656.438	491.362	570.377	683.729	737.599	600.61	596.065	718.557	891.225		14.65	113.503	12.097	-18.008	96.231	101.92	108.852	70.284	-36.36	235.441		69.861	80.2453
571.154	705.049	510.774	545.442	652.222	728.734	613.746	624.427	724.746	759.562		-3.777	162.114	21.125	-27.477	78.786	92.429	82.955	61.092	-7.073	103.778		56.3952	59.5131
641.552	661.44	513.065	569.004	647.971	719.717	602.104	639.422	693.806	726.211		37.255	118.505	46.225	-121.928	47.279	66.895	52.357	21.007	33.635	70.427		37.1657	62.0087
616.223	608.686	512.134	562.321	592.997	773.554	611.574	590.669	714.077	728.577		72.342	65.751	-7.564	-92.528	43.028	28.943	59.443	102.696	21.126	72.793		36.603	55.0672
626.063	586.106	540.038	550.385	645.629	789.382	600.843	609.34	675.589	760.581		53.022	43.171	-27.887	-22.232	-11.946	26.466	72.579	28.673	93.273	104.797		35.9916	46.6766
609.378	589.946	529.536	498.382	653.359	766.045	584.016	651.356	663.458	716.872		69.986	47.011	-18.948	-22.097	40.686	70.743	60.937	9.778	55.831	61.088		37.5015	35.2916
599.274	632.845	495.966	515.398	677.839	710.104	599.655	645.778	705.378	757.686		46.062	89.91	45.431	-98.865	48.416	68.886	70.407	-6.511	12.657	101.902		37.8295	58.0863
637.82	611.516	508.398	540.707	632.426	740.679	636.48	655.266	703.93	749.882		37.319	68.581	25.782	-95.511	72.896	60.021	59.676	-16.13	53.447	94.098		36.0179	55.1352
626.366	548.423	517.426	504.511	653.138	746.915	618.233	640.056	678.823	682.318		89.231	5.488	22.178	-32.376	27.483	51.004	42.849	12.232	-10.884	26.534		23.3739	33.7209
591.011	599.706	542.526	502.549	699.282	783.111	563.669	615.299	711.993	767.114		75.051	56.771	11.72	-78.718	48.195	104.841	58.488	27.227	40.302	111.33		45.5207	53.7104
592.664	615.856	488.737	535.299	721.411	768.111	643.665	644.735	711.743	728.351		9.264	72.921	9.581	-31.312	94.339	120.669	95.313	-21.526	77.587	72.567		49.9403	53.5721
552.644	624.894	468.414	513.515	624.871	754.168	632.454	642.268	681.039	698.719		79.662	81.959	45.997	-56.247	116.468	97.332	77.066	-2.855	62.596	42.935		54.4913	50.987
568.126	622.02	477.353	480.515	652.735	790.627	623.68	624.812	713.603	717.426		54.333	79.085	37.184	-32.685	19.928	41.391	22.502	39.161	68.785	61.642		39.1326	31.6671
612.673	654.063	541.732	553.885	684.256	727.545	620.698	586.339	698.884	750.605		64.173	111.128	38.3	-39.368	47.792	71.966	102.498	33.583	37.845	94.821		56.2738	43.8901
634.611	591.449	522.083	506.513	659.91	723.193	632.651	623.151	694.986	706.572		47.488	48.514	0.024	-51.304	79.313	78.202	91.287	43.071	58.116	50.788		44.5499	42.0916
564.611	642.554	518.479	482.681	642.529	752.185	620.069	638.605	760.373	734.174		37.384	99.619	19.161	-103.307	54.967	114.398	82.513	27.861	19.628	78.39		43.0614	61.5009
593.954	653.508	508.021	513.454	689.152	662.18	627.324	647.91	698.966	708.374		75.93	110.573	21.949	-86.291	37.586	99.398	79.531	3.104	7.497	52.59		40.1867	57.9457
619.283	644.684	505.882	530.543	640.844	715.076	661.207	683.727	723.608	711.235		64.476	101.749	27.297	-60.982	84.209	85.455	91.484	32.54	49.417	55.451		53.1096	47.2657
621.343	636.453	542.298	553.084	670.852	683.935	660.201	655.618	706.385	732.722		29.121	93.518	27.142	-97.178	35.901	121.914	78.902	30.073	47.969	76.938		44.43	59.1945
679.687	613.589	533.485		645.728	689.258	672.9	659.235		804.769		30.774	70.654	6.937	-99.14	65.909	58.832	86.157	12.617	22.862	148.985		40.4587	64.5957
672.322	663.701	534.601		724.11	698.082	689.967	622.401		773.062		-9.246	120.766	10.464	-66.39	40.785	54.48	120.04	-25.856	56.032	117.278		41.8353	65.2248
	687.11	496.325		665.069	715.764	653.48	618.347		828.866		6.236	144.175	0.45	-88.174	119.167	83.472	119.034	10.956	55.782	173.082		62.418	80.3925
	593.687	515.462		686.606	700.829	600.912	677.895		891.918		50.783	50.752	31.754	-121.174	60.126	-6.533	131.733	26.41	25.078	236.134		48.5063	91.5391
	629.204	518.25		676.496	730.422	604.773	640.325		867.672		72.721	86.269	7.798	-47.804	81.663	46.363	148.8	35.715	57.642	211.888		70.1055	71.7894
	595.965	523.598		685.748	750.304	606.988	733.727		794.649		2.721	53.03	14.954	-95.176	71.553	15.222	112.313	71.532	42.923	138.865		42.7937	64.9762
	625.195	523.443		680.045	759.691	620.908	741.683		781.061		32.064	82.26	-11.976	-119.008	80.805	20.545	59.745	43.423	39.025	125.277		35.216	66.1004
	658.457	503.238		634.768	788.452	613.447	682.244		739.396		57.393	115.522	-14.357	-88.235	75.102	29.369	63.606	47.04	104.412	83.612		47.3464	60.4319
	636.911	506.765		651.583	772.75	628.722			754.441		59.453	93.976	28.509	-71.146	29.825	47.051	65.821	10.206	43.005	98.657		40.5357	48.226
	643.862	496.751		702.538		656.456			723.194		117.797	100.927	-22.612	-48.605	46.64	32.116	79.741	6.152	67.647	67.41
	696.891	528.055		752.086		601.983			738.471		110.432	153.956	-2.222		97.595	61.709	72.28	65.7	50.424	82.687
	659.478	504.099		702.737		671.07			720.957			116.543	24.416		147.143	81.591	87.555	28.13		65.173
	623.301	511.255		684.824		648.083			724.086			80.366	40.158		97.794	90.978	115.289	121.532		68.302
	618.465	484.325		661.438		620.666			741.582			75.53	39.098		79.881	119.739	60.816	129.488		85.798
	610.372	481.944		715.515		709.288			762.654			67.437	17.596		56.495	104.037	129.903	70.049		106.87
	605.049	524.81		713.35					801.224			62.114	21.691		110.572		106.916			145.44
	655.267	473.689		692.738					887.225			112.332	15.098		108.407		79.499			231.441
	642.02	494.079		697.044					859.758				-23.694		87.795		168.121			203.974
	669.2	520.717		759.717					796.913											141.129
	647.184	536.459		705.912					788.36											132.576
	653.101	535.399							758.663											102.879
	674.669	513.897
		517.992
		511.399
		472.607
		510.612
		534.209
		549.689
		524.24
		534.46
		501.64
		514.341
		518.283
		534.96
		530.586

## Sheet: Control
201105_noca1degfp_C_1	201105_noca1degfp_C_2	201105_noca1degfp_C_3	201105_noca1degfp_C_4	201105_noca1degfp_C_5	201105_noca1degfp_C_6	201105_noca1degfp_C_7	201105_noca1degfp_C_8	201105_noca1degfp_C_9	201105_noca1degfp_C_11		201105_noca1degfp_C_1	201105_noca1degfp_C_2	201105_noca1degfp_C_3	201105_noca1degfp_C_4	201105_noca1degfp_C_5	201105_noca1degfp_C_6	201105_noca1degfp_C_7	201105_noca1degfp_C_8	201105_noca1degfp_C_9	201105_noca1degfp_C_11
556.256	456.606	489.841	500.927	464.024	487.413	529.637	517.595	491.315	495.795			45.32	2.608	-27.959	-21.778
488.294	519.962	510.634	497.931	497.223	546.73	522.704	500.909	491.646	530.253			-7.525	29.656	-36.337	11.421
501.895	467.117	511.544	506.578	466.283	536.999	510.434	469.258	481.271	528.306			-10.324	48.73	-17.217	-19.519	-38.885
593.222	464.318	476.07	478.926	468.544	529.174	491.309	477.548	489.169	533.003			-2.033	26.41	-20.942	-17.258	20.432
571.14	472.609	503.49	470.548	477.938	490.306	505.136	496.027	521.842	552.166		63.579	26.111	37.538	-19.685	-7.864	10.701	30.872
554.139	500.753	488.107	489.668	468.263	501.519	500.496	476.682	483.568	524.444		-4.383	10.004	9.559	10.913	-17.539	2.876	23.939
552.855	484.646	491.127	485.943	485.089	490.304	523.538	465.424	491.165	533.347		9.218	6.975	14.561	37.509	-0.713	-35.992	11.669	34.725		-0.705
565.259	481.617	504.381	487.2	513.268	486.358	499.031	490.654	498.828	517.229		100.545	7.941	20.373	28.421	27.466	-24.779	-7.456	18.039		33.753
576.405	482.583	500.463	517.798	510.179	470.043	485.878	495.453	474.984	504.32		78.463	-16.582	-12.202	32.122	24.377	-35.994	6.371	-13.612		31.806
553.563	458.06	494.337	544.394	531.156	491.877	512.006	484.905	500.067	504.556		61.462	3.571	-12.7	28.852	45.354	-39.94	1.731	-5.322		36.503
533.946	478.213	521.385	535.306	515.12	484.527	526.815	472.702	499.377	514.302		60.178	-28.247	-16.364	30.879	29.318	-56.255	24.773	13.157	20.966	55.666		13.4071	36.8063
608.82	446.395	540.459	539.007	484.889	483.778	491.166	480.931	494.577	516.701		72.582	-13.512	6.678	36.978	-0.913	-34.421	0.266	-6.188	21.297	27.944		11.0711	29.9915
610.192	461.13	518.139	535.737	502.699	467.774	534.106	477.604	510.977	503.437		83.728	-20.647	7.888	27.914	16.897	-41.771	-12.887	-17.446	10.922	36.847		9.1445	35.6209
551.604	453.995	529.267	537.764	472.876	484.39	520.667	453.966	495.248	483.561		60.886	-11.908	24.756	7.29	-12.926	-42.52	13.241	7.784	18.82	20.729		8.6152	27.4217
562.085	462.734	501.288	543.863	460.056	476.366	515.464	460.558	493.757	486.264		41.269	0.394	11.434	12.623	-25.746	-58.524	28.05	12.583	51.493	7.82		8.1396	31.757
527.712	475.036	506.29	534.799	476.445	461.524	483.333	486.108	483.313	479.152		116.143	17.366	1.485	35.889	-9.357	-41.908	-7.599	2.035	13.219	8.056		13.5329	41.3588
497.952	492.008	512.102	514.175	469.847	465.1	491.122	503.011	464.762	490.226		117.515	21.739	-26.385	-1.938	-15.955	-49.932	35.341	-10.168	20.816	17.802		10.8835	45.5194
503.266	496.381	479.527	519.508	464.178	484.411	483.77	503.876	440.788	482.998		58.927	14.581	-21.254	7.568	-21.624	-64.774	21.902	-1.939	28.479	20.201		4.2067	33.9655
517.57	489.223	479.029	542.774	464.517	457.596	481.056	516.058	466.655	513.314		69.408	0.768	5.18	-4.597	-21.285	-61.198	16.699	-5.266	4.635	6.937		1.1281	32.3655
496.042	475.41	475.365	504.947	476.025	460.461	517.298	546.974	479.921	516.652		35.035	-1.71	5.671	32.275	-9.777	-41.887	-15.432	-28.904	29.718	-12.939		-0.795	26.399
509.769	472.932	498.407	514.453	468.797	463.332	484.144	489.863	493.162	525.314		5.275	19.119	5.633	12.452	-17.005	-68.702	-7.643	-22.312	29.028	-10.236		-5.4391	27.4815
471.339	493.761	499.617	502.288	486.274	532.966	494.442	489.948	469.269	538.457		10.589	38.623	-11.205	-7.916	0.472	-65.837	-14.995	3.238	24.228	-17.348		-4.0151	28.0652
541.976	513.265	516.485	539.16	488.099	503.031	499.143	504.581	464.571	539.784		24.893	35.232	6.95	10.844	2.297	-62.966	-17.709	20.141	40.628	-6.274		5.4036	30.0261
524.212	509.874	503.163	519.337	463.244	475.49	472.392	496.489	464.96	538.63		3.365	32.194	-8.838	-12.965	-22.558	6.668	18.533	21.006	24.899	-13.502		4.8802	18.8448
540.025	506.836	493.214	498.969	509.164	495.625	505.015	516.124	486.348	579.481		17.092	13.994	22.94	12.204	23.362	-23.267	-14.621	33.188	23.408	16.814		12.5114	17.7351
519.65	488.636	465.344	517.729	506.949	496.99	514.215	488.744	473.58	562.615		-21.338	36.844	13.861	4.039	21.147	-50.808	-4.323	64.104	12.964	20.152		9.6642	31.3016
549.665	511.486	470.475	493.92	518.638	493.162	489.029	467.625	502.499	532.442		49.299	20.197	-0.455	8.25	32.836	-30.673	0.378	6.993	-5.587	28.814		11.0052	22.6691
507.002	494.839	496.909	519.089	498.735	504.465	470.006	500.517	552.016	514.647		31.535	-10.813	9.253	4.214	12.933	-29.308	-26.373	7.078	-29.561	41.957		1.0915	24.9643
572.25	463.829	497.4	510.924	482.413	529.022	493.445	490.348	592.135	536.752		47.348	-37.807	33.692	13.598	-3.389	-33.136	6.25	21.711	-3.694	43.284		8.7857	29.3
512.875	436.835	497.362	515.135	483.51	518.868	491.883	491.65	659.992	547.157		26.973	-15.006	28.105	-0.233	-2.292	-21.833	15.45	13.619	9.572	42.13		9.6485	19.9566
536.128	459.636	480.524	511.099	476.531	473.541	500.978	496.622	714.263	526.992		56.988	5.511	61.227	-14.558	-9.271	2.724	-9.736	33.254	22.813	82.981		23.1933	34.2534
555.485	480.153	498.679	520.483	468.46	475.968	484.646	478.263	839.961	479.737		14.325	-22.23	24.515	-21.144	-17.342	-7.43	-28.759	5.874	-1.08	66.115		1.2844	28.5206
584.55	452.412	482.891	506.652	480.476	499.031	477.118	553.616	921.183	524.229		79.573	-25.073	12.773	-15.811	-5.326	-52.757	-5.32	-15.245	-5.778	35.942		0.2978	36.1638
568.155	449.569	514.669	492.327	457.601	500.887	470.279	538.016	845.893	564.34		20.198	-4.53	39.537	-34.654	-28.201	-50.33	-6.882	17.647	-5.389	18.147		-3.4457	28.1254
536.48	470.112	505.59	485.741	475.595	473.619	503.18	613.04	754.675	581.266		43.451	-18.071	-0.635	-12.765	-10.207	-27.267	2.213	7.478	15.999	40.252		4.0448	23.5678
550.712	456.571	491.274	491.074	508.968	459.366	494.386	598.288	812.734	592.651		62.808	-6.184	6.536	1.596	23.166	-25.411	-14.119	8.78	3.231	50.657		11.106	27.5486
587.87	468.458	500.982	472.231	470.484	482.767	511.32	601.697	685.895	645.467		91.873	3.37	27.517	-11.065	-15.318	-52.679	-21.647	13.752	32.15	30.492		9.8445	39.4311
558.02	478.012	525.421	494.12	473.937	562.031	535.094	602.21	679.669	654.101		75.478	9.476	42.785	-15.263	-11.865	-66.932	-28.486	-4.607	81.667	-16.763		6.549	46.934
584.837	484.118	519.834	508.481	472.73	557.238	633.252	597.156	624.718	652.32		43.803	8.262	54.012	-15.768	-13.072	-43.531	4.415	70.746	121.786	27.729		25.8382	48.4972
757.399	482.904	552.956	495.82	514.46	578.087	683.101	566.13	606.482	615.992		58.035	56.104	30.138	9.703	28.658	35.733	-4.379	55.146	189.643	67.84		52.6621	53.2398
705.204	530.746	516.244	491.622	570.272	643.341	629.468	574.632	574.948	567.135		95.193	79.973	29.305	66.524	84.47	30.94	12.555	130.17	243.914	84.766		85.781	65.8546
616.42	554.615	504.502	491.117	618.936	616.253	588.105	569.007	571.729	564.42		65.343	167.612	112.577	95.982	133.134	51.789	36.329	115.418	369.612	96.151		124.395	94.5252
626.17	642.254	531.266	516.588	654.884	591.334	570.78	505.799	583.681	604.002		92.16	204.676	155.13	107.044	169.082	117.043	134.487	118.827	450.834	148.967		169.825	104.052
607.393	679.318	491.094	573.409	633.541	587.426	548.403	500.485	517.725	583.751		264.722	235.031	250.724	164.028	147.739	89.955	184.336	119.34	375.544	157.601		198.902	83.982
597.769	709.673	498.265	602.867	655.124	610.956	500.121	498.308	525.372	584.628		212.527	195.295	226.402	128.535	169.322	65.036	130.703	114.286	284.326	155.82		168.225	63.4693
518.533	669.937	519.246	613.929	634.352	537.228	531.266	494.083	507.579	567.573		123.743	177.068	156.634	155.53	148.55	61.128	89.34	83.26	342.385	119.492		145.713	78.3793
536.747	651.71	534.514	670.913	622.528	515.753	492.129	511.638	523.232	571.076		133.493	149.309	147.232	101.646	136.726	84.658	72.015	91.762	215.546	70.635		120.302	45.1089
507.395	623.951	545.741	635.42	530.573	509.522	493.278	514.616	524.793	587.991		114.716	91.286	103.559	35.882	44.771	10.93	49.638	86.137	209.32	67.92		81.4159	55.4324
537.445	565.928	521.867	662.415	539.471	521.785	484.505	514.687	538.494	584.217		105.092	63.552	66.472	29.856	53.669	-10.545	1.356	22.929	154.369	107.502		59.4252	51.6238
553.135	538.194	521.034	608.531	481.641	537.213	490.759	460.148	546.075	555.276		25.856	123.71	99.123	46.679	-4.161	-16.776	32.501	17.615	136.133	87.251		54.7931	53.5043
569.426	598.352	604.306	542.767	487.872	507.535	496.689	483.89	556.083	553.554		44.07	78.746	139.452	-1.165	2.07	-4.513	-6.636	15.438	104.599	88.128		46.0189	53.1543
562.955	553.388	646.859	536.741	514.944	507.447	560	458.84	573.496	531.369		14.718	51.338	112.767	10.553	29.142	10.915	-5.487	11.213	101.38	71.073		40.7612	41.5247
477.58	525.98	742.453	553.564	513.473	545.414	536.352	471.209	566.249	558.332		44.768	79.681	91.884	0.087	27.671	-18.763	-14.26	28.768	113.332	74.576		42.7744	46.0119
536.292	554.323	718.131	505.72	513.211	507.24	539.195	498.859	594.242	559.386		60.458	96.299	75.282	-1.204	27.409	-18.851	-8.006	31.746	47.376	91.491		40.2	41.1376
505.089	570.941	648.363	517.438	531.988	527.193	547.925	482.342	535.662	594.528		76.749	54.642	38.69	38.152	46.186	19.116	-2.076	31.817	55.023	87.717		44.6016	26.1887
473.581	529.284	638.961	506.972	536.863	500.087	553.41	516.158	550.097	630.43		70.278	45.384	11.546	54.029	51.061	-19.058	61.235	-22.722	37.23	58.776		34.7759	33.391
481.596	520.026	595.288	505.681	539.682	496.988	506.086	479.167	559.001	624.017		-15.097	57.499	35.508	15.437	53.88	0.895	37.587	1.02	52.883	57.054		29.6666	27.0833
506.651	532.141	558.201	545.037	533.012	547.513	501.352	519.486	579.655	566.629		43.615	41.618	32.433	-3.489	47.21	-26.211	40.43	-24.03	54.444	34.869		24.0889	30.191
478.388	516.26	590.852	560.914	524.028	489.624	496.083	559.944	532.501	585.928		12.412	53.155	60.611	1.464	38.226	-29.31	49.16	-11.661	68.145	61.832		30.4034	34.5633
481.938	527.797	631.181	522.322	506.675	517.472	513.952	561.267	538.021	574.256		-19.096	45.482	91.354	22.775	20.873	21.215	54.645	15.989	75.726	62.886		39.1849	32.9301
481.604	520.124	604.496	503.396	481.725	537.549	484.916	520.448	503.697	557.147		-11.081	41.269	94.912	35.905	-4.077	-36.674	7.321	-0.528	85.734	98.028		31.0809	48.1184
493.09	515.911	583.613	508.349	479.98	529.344	495.81	511.138	516.953	566.514		13.974	42.877	85.856	8.085	-5.822	-8.826	2.587	33.288	103.147	133.93		40.9096	50.0417
507.727	517.519	567.011	529.66	502.513	551.992	540.155	511.155	516.348	583.982		-14.289	14.385	40.191	-27.576	16.711	11.251	-2.682	-3.703	95.9	127.517		25.7705	49.4748
508.698	489.027	530.419	542.79	518.395	539.269	529.099	535.875	495.176	561.368		-10.739	25.641	53.004	-34.776	32.593	3.046	15.187	36.616	123.893	70.129		31.4594	44.4787
547.44	500.283	503.275	514.97	483.648	546.323	521.511	516.252	518.016	530.683		-11.073	31.512	85.227	-3.435	-2.154	25.694	-13.849	77.074	65.313	89.428		34.3737	41.681
567.244	506.154	527.237	479.309	486.036	561.617	540.822	521.859	535.26	550.802		0.413	44.781	71.352	36.8	0.234	12.971	-2.955	78.397	79.748	77.756		39.9497	35.3081
549.14	519.423	524.162	472.109	524.094	563.854	484.619	510.968		544.389		15.05	17.798	34.947	6.231	38.292	20.025	41.39	37.578	88.652	60.647		36.061	24.3338
540.541	492.44	552.34	503.45	508.482	538.85	529.437	532.498		536.493		16.021	44.477	29.955	-5.575	22.68	35.319	30.334	28.268	109.306	70.014		38.0799	31.611
558.396	519.119	583.083	543.685	495.811	538.537	537.098	507.607		564.861		54.763	51.009	26.157	2.769	10.009	37.556	22.746	28.285	62.152	87.482		38.2928	25.7626
542.862	525.651	586.641	513.116	512.818	524.524	507.134	490.436		549.672		74.567	78.438	34.622	3.53	27.016	12.552	42.057	53.005	67.672	64.868		45.8327	26.1845
502.977	553.08	577.585	501.31	498.019	559.524	512.767	503.231		566.719		56.463	47.034	30.29	33.163	12.217	12.239	-14.146	33.382	33.348	34.183		27.8173	19.9265
501.41	521.676	531.92	509.654	483.632	560.793	496.876	503.909		586.218		47.864	32.814	22.789	4.847	-2.17	-1.774	30.672	38.989	46.604	54.302		27.4937	20.9256
502.079	507.456	544.733	510.415	491.247	584.909	471.27	486.229		552.766		65.719	33.773	31.537	14.919	5.445	33.226	38.333	28.098	45.999	47.889		34.4938	16.9323
496.167	508.415	576.956	540.048	485.753	584.039	524.575			588.267		50.185	17.795	5.3	6.245	-0.049	34.495	8.369	49.628	24.827	39.993		23.6788	18.9565
519.39	492.437	563.081	511.732	498.227	608.194	524.259			581.766		10.3	7.819	20.924	22.17	12.425	58.611	14.002	24.737	47.667	68.361		28.7016	21.6069
537.18	482.461	526.676	521.804	526.015	653.896	501.04			541.299		8.733	-20.104	17.339	25.974	40.213	57.741	-1.889	7.566	64.911	53.172		25.3656	28.0361
460.174	454.538	521.684	513.13	509.823	580.864	518.122			532.064		9.402	-12.972	43.714	-23.524	24.021	81.896	-27.495	20.361		70.219
514.736	461.67	517.886	529.055	502.67	565.352				493.869		3.49	7.704	31.383	-0.544	16.868	127.598	25.81	21.039		89.718
522.486	482.346	526.351	532.859	501.634	531.543				495.209		26.713	1.227	16.27	-0.312	15.832	54.566	25.494	3.359		56.266
554.546	475.869	522.019	483.361	540.541	566.273						44.503	-24.799	37.195	31.122	54.739	39.054	2.275			91.767
	449.843	514.518	506.341	542.691							-32.503	-16.628	38.947	38.795	56.889	5.245	19.357			85.266
	458.014	523.266	506.573	543.116							22.059	-27.105	75.169	60.508	57.314	39.975				44.799
	447.537	497.029	538.007	532.055							29.809	-30.716	102.362	53.29	46.253					35.564
	443.926	512.653	545.68	516.586							61.869	-1.856	95.632	32.553	30.784					-2.631
	472.786	509.068	567.393	540.948								-11.231	123.894	70.203	55.146					-1.291
	463.411	535.443	560.175	566.448										56.713	80.646
		523.112	539.438											59.064
		507.999	577.088											12.831
		528.924	563.598
		530.676	565.949
		566.898	519.716
		594.091
		587.361
		615.623
		578.293
		521.497
		528.702
		560.581
		529.477
		527.505
