# Supplementary material for: Epidermal PAR-6 and PKC-3 are essential for larval development of C. elegans and organize non-centrosomal microtubules
Source: eLife journal article supplement (doi:10.7554/elife.62067), 2020-12-10
Supplement: fig6-data1 [file Ptrn-1 puncta.xlsx]

## Sheet: Sheet1
PAR-6 deg	Puncta	Area (um2)	Puncta/um2		Control	Puncta	Area (um2)	Puncta/um2			Average
190905_P6AID_PTRN_AUXIN_7	211	913.842	0.230893		190905_wow4_NGM_8	200	850.353	0.235196		Auxin	0.17581
190905_P6AID_PTRN_AUXIN_11	226	995.308	0.227065		190905_wow4_NGM_1	273	692.72	0.394099		NGM	0.295821
190905_P6AID_PTRN_AUXIN_14	210	1141.22	0.184014		190905_wow4_NGM_4	347	1141.66	0.303943
190905_P6AID_PTRN_AUXIN_5	215	1221.33	0.176038		190905_wow4_NGM_12	322	1314.31	0.244995
190905_P6AID_PTRN_AUXIN_2	133	939.419	0.141577		190905_wow4_NGM_16	530	1487.49	0.356305
191002_P6AID_JLF15_1	113	1077.81	0.104842		191002_JLF15_4	265	903.848	0.293191
191002_P6AID_JLF15_5	185	840.484	0.220111		191002_JLF15_1	219	1027.72	0.213092
191002_P6AID_JLF15_3	115	835.599	0.137626		191002_JLF15_11	314	821.758	0.382108
191002_P6AID_JLF15_2	145	902.865	0.1606		191002_JLF15_9	247	821.509	0.300666
191002_P6AID_JLF15_4	150	855.502	0.175336		191002_JLF15_7	222	946.242	0.234612
