# Supplementary figures and images for: Epidermal PAR-6 and PKC-3 are essential for larval development of C. elegans and organize non-centrosomal microtubules
Source: eLife journal article supplement (doi:10.7554/elife.62067), 2020-12-10

# EB-2 comet density (comets/100 $\mu\text{m}^2$ )

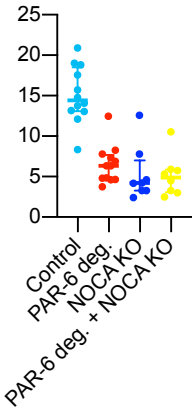

Supplement: fig5-data1 [file 191002 - Comet density hyp7 - L2 - 1 to 2 hours - noca1 - combined.pdf › Fig 5/F/191002 - Comet density hyp7 - L2 - 1 to 2 hours - noca1 - combined.pdf]
